# Supplementary material for: Using population selection and sequencing to characterize natural variation of starvation resistance in Caenorhabditis elegans
Source: eLife. 2022 Jun 21;11:e80204. doi: 10.7554/eLife.80204 (PMC9262388; doi:10.7554/eLife.80204)
Supplement: Figure 2—source data 1. [file elife-80204-fig2-data1.xlsx]

## Sheet: README
Source data is available on each sheet for manual phenotypic assays for survival, recovery, and early fecundity. These correspond to the figure panels below:
Fig 2E
Fig 2F
Fig 2G

## Sheet: Fig_2E
condition	replicate.id	1	3	5	7	9	11	13	15	17	18	19	20	21	22	23	24	25	26	27
DL238	rep1	1	1		0.951807	0.876543	0.84507	0.925926	0.534884		0.425743		0.31		0.195652		0.0449438		0
MY2147	rep1	0.935185	1		0.96748	0.878505	0.766355	0.736434	0.15126		0.152		0.0671642		0.0310078		0
NIC526	rep1	0.92233	0.981982		0.913462	0.942857	0.7	0.586777	0.0186916		0.00980392		0
EG4725	rep1	0.953846	0.930233		0.963636	0.909091	0.744186	0.733333	0.333333		0.25641		0.0816327		0.037037		0
DL238	rep2	0.978947	0.978261	0.941176	1.02913	0.932039		0.763441	0.729167	0.590361		0.242105		0.0340909		0.00819672				0
EG4725	rep2	0.882353	0.95	0.911765	0.920792	0.855556		0.631068	0.388235	0.230769		0.0280374		0.00952381		0
MY2147	rep2	0.936508	0.98	0.933333	0.827586	0.78125		0.0545455	0
NIC526	rep2	0.903846	0.806452	0.868421	0.920792	0.841121		0.386139	0.235294	0.0555556		0
DL238	rep3	0.94382	0.766355	1.06383	0.94186		0.82716	0.682353	0.462687	0.365591		0.0571429		0.0227273				0
EG4725	rep3	0.866667	0.915493	0.973684	0.901099		0.848485	0.666667	0.408451	0.277778		0.0344828		0.0422535				0
MY2147	rep3	1	0.862069	0.319149	0.74026		0.091954	0
NIC526	rep3		0.930233	0.965517	0.666667		0.389831	0.22449	0.0322581	0
DL238	rep4	0.92126	0.912162	1.00787		0.913333	0.947368	0.885057	0.533333	0.183673		0.0208333					0
EG4725	rep4	0.974359	0.93617	0.867647		0.837607	0.698529	0.407767	0.0921053	0.0288462		0
MY2147	rep4	1	0.767241	0.84466		0.838095	0.404762	0.0409836	0.00980392	0
NIC526	rep4	0.989899	0.808	0.8		0.58	0.195122	0.0634921	0

## Sheet: Fig_2F
strain	replicate	day	experimentId	imageFile	id	pass	length
DL238	rep2	d1	tifs	../tifs/Snap-63852-Image Export-08.tif	0	TRUE	885.648
DL238	rep2	d1	tifs	../tifs/Snap-63852-Image Export-08.tif	2	TRUE	905.513
DL238	rep2	d1	tifs	../tifs/Snap-63853-Image Export-09.tif	1	TRUE	904.716
DL238	rep2	d1	tifs	../tifs/Snap-63861-Image Export-17.tif	0	TRUE	919.142
DL238	rep2	d1	tifs	../tifs/Snap-63860-Image Export-16.tif	0	TRUE	942.316
DL238	rep2	d1	tifs	../tifs/Snap-63856-Image Export-12.tif	0	TRUE	960.387
DL238	rep2	d1	tifs	../tifs/Snap-63856-Image Export-12.tif	1	TRUE	890.421
DL238	rep2	d1	tifs	../tifs/Snap-63864-Image Export-20.tif	0	TRUE	886
DL238	rep2	d1	tifs	../tifs/Snap-63863-Image Export-19.tif	0	TRUE	875.735
DL238	rep2	d1	tifs	../tifs/Snap-63863-Image Export-19.tif	1	TRUE	917.127
DL238	rep2	d1	tifs	../tifs/Snap-63862-Image Export-18.tif	0	TRUE	888.015
DL238	rep2	d1	tifs	../tifs/Snap-63865-Image Export-21.tif	1	TRUE	946.368
DL238	rep2	d1	tifs	../tifs/Snap-63857-Image Export-13.tif	2	TRUE	978.345
DL238	rep2	d1	tifs	../tifs/Snap-63854-Image Export-10.tif	0	TRUE	948.383
DL238	rep2	d1	tifs	../tifs/Snap-63854-Image Export-10.tif	1	TRUE	947.755
DL238	rep2	d1	tifs	../tifs/Snap-63866-Image Export-22.tif	1	TRUE	933.421
DL238	rep2	d1	tifs	../tifs/Snap-63867-Image Export-23.tif	0	TRUE	931.644
DL238	rep2	d1	tifs	../tifs/Snap-63867-Image Export-23.tif	1	TRUE	936.455
DL238	rep2	d1	tifs	../tifs/Snap-63855-Image Export-11.tif	0	TRUE	938.822
DL238	rep2	d1	tifs	../tifs/Snap-63855-Image Export-11.tif	1	TRUE	879.895
DL238	rep2	d1	tifs	../tifs/Snap-63850-Image Export-06.tif	0	TRUE	901.314
DL238	rep2	d1	tifs	../tifs/Snap-63851-Image Export-07.tif	0	TRUE	934.272
DL238	rep2	d1	tifs	../tifs/Snap-63848-Image Export-04.tif	0	TRUE	925.967
DL238	rep2	d1	tifs	../tifs/Snap-63849-Image Export-05.tif	0	TRUE	899.76
DL238	rep2	d1	tifs	../tifs/Snap-63849-Image Export-05.tif	1	TRUE	931.774
DL238	rep2	d1	tifs	../tifs/Snap-63858-Image Export-14.tif	0	TRUE	838.135
DL238	rep2	d1	tifs	../tifs/Snap-63858-Image Export-14.tif	1	TRUE	880.025
DL238	rep2	d1	tifs	../tifs/Snap-63858-Image Export-14.tif	2	TRUE	840.557
DL238	rep2	d1	tifs	../tifs/Snap-63859-Image Export-15.tif	0	TRUE	931.146
DL238	rep2	d1	tifs	../tifs/Snap-63868-Image Export-24.tif	0	TRUE	876.754
DL238	rep2	d1	tifs	../tifs/Snap-63868-Image Export-24.tif	1	TRUE	924.044
DL238	rep2	d1	tifs	../tifs/Snap-63869-Image Export-25.tif	1	TRUE	916.812
DL238	rep2	d1	tifs	../tifs/Snap-63845-Image Export-01.tif	0	TRUE	896.634
DL238	rep2	d1	tifs	../tifs/Snap-63847-Image Export-03.tif	0	TRUE	931.46
EG4725	rep2	d1	tifs	../tifs/Snap-63841-Image Export-37.tif	0	TRUE	1048.57
EG4725	rep2	d1	tifs	../tifs/Snap-63813-Image Export-09.tif	0	TRUE	981.508
EG4725	rep2	d1	tifs	../tifs/Snap-63813-Image Export-09.tif	1	TRUE	1011.65
EG4725	rep2	d1	tifs	../tifs/Snap-63840-Image Export-36.tif	3	TRUE	1072.91
EG4725	rep2	d1	tifs	../tifs/Snap-63812-Image Export-08.tif	0	TRUE	1014.02
EG4725	rep2	d1	tifs	../tifs/Snap-63812-Image Export-08.tif	1	TRUE	1013.93
EG4725	rep2	d1	tifs	../tifs/Snap-63820-Image Export-16.tif	0	TRUE	854.614
EG4725	rep2	d1	tifs	../tifs/Snap-63821-Image Export-17.tif	0	TRUE	1037.1
EG4725	rep2	d1	tifs	../tifs/Snap-63833-Image Export-29.tif	0	TRUE	1026.39
EG4725	rep2	d1	tifs	../tifs/Snap-63844-Image Export-40.tif	0	TRUE	854.522
EG4725	rep2	d1	tifs	../tifs/Snap-63832-Image Export-28.tif	0	TRUE	1075.72
EG4725	rep2	d1	tifs	../tifs/Snap-63829-Image Export-25.tif	0	TRUE	1029.87
EG4725	rep2	d1	tifs	../tifs/Snap-63828-Image Export-24.tif	0	TRUE	1037.77
EG4725	rep2	d1	tifs	../tifs/Snap-63819-Image Export-15.tif	0	TRUE	1074.43
EG4725	rep2	d1	tifs	../tifs/Snap-63818-Image Export-14.tif	0	TRUE	1023.08
EG4725	rep2	d1	tifs	../tifs/Snap-63831-Image Export-27.tif	0	TRUE	1020.27
EG4725	rep2	d1	tifs	../tifs/Snap-63830-Image Export-26.tif	0	TRUE	1044.78
EG4725	rep2	d1	tifs	../tifs/Snap-63807-Image Export-03.tif	0	TRUE	1049.51
EG4725	rep2	d1	tifs	../tifs/Snap-63835-Image Export-31.tif	0	TRUE	968.247
EG4725	rep2	d1	tifs	../tifs/Snap-63834-Image Export-30.tif	0	TRUE	954.726
EG4725	rep2	d1	tifs	../tifs/Snap-63806-Image Export-02.tif	0	TRUE	1089.48
EG4725	rep2	d1	tifs	../tifs/Snap-63805-Image Export-01.tif	0	TRUE	1033.53
EG4725	rep2	d1	tifs	../tifs/Snap-63837-Image Export-33.tif	0	TRUE	990.939
EG4725	rep2	d1	tifs	../tifs/Snap-63837-Image Export-33.tif	1	TRUE	1020.09
EG4725	rep2	d1	tifs	../tifs/Snap-63836-Image Export-32.tif	0	TRUE	1093.86
EG4725	rep2	d1	tifs	../tifs/Snap-63836-Image Export-32.tif	1	TRUE	1076.09
EG4725	rep2	d1	tifs	../tifs/Snap-63815-Image Export-11.tif	0	TRUE	1049.83
EG4725	rep2	d1	tifs	../tifs/Snap-63827-Image Export-23.tif	0	TRUE	1073.09
EG4725	rep2	d1	tifs	../tifs/Snap-63826-Image Export-22.tif	0	TRUE	1046.17
EG4725	rep2	d1	tifs	../tifs/Snap-63814-Image Export-10.tif	0	TRUE	807.063
EG4725	rep2	d1	tifs	../tifs/Snap-63825-Image Export-21.tif	0	TRUE	1013.93
EG4725	rep2	d1	tifs	../tifs/Snap-63825-Image Export-21.tif	1	TRUE	1012.67
EG4725	rep2	d1	tifs	../tifs/Snap-63822-Image Export-18.tif	1	TRUE	1057.06
EG4725	rep2	d1	tifs	../tifs/Snap-63823-Image Export-19.tif	0	TRUE	1025.45
EG4725	rep2	d1	tifs	../tifs/Snap-63824-Image Export-20.tif	0	TRUE	1014.02
EG4725	rep2	d1	tifs	../tifs/Snap-63824-Image Export-20.tif	1	TRUE	1034.61
EG4725	rep2	d1	tifs	../tifs/Snap-63816-Image Export-12.tif	0	TRUE	1075.28
EG4725	rep2	d1	tifs	../tifs/Snap-63816-Image Export-12.tif	1	TRUE	1004.2
EG4725	rep2	d1	tifs	../tifs/Snap-63809-Image Export-05.tif	0	TRUE	1050.01
EG4725	rep2	d1	tifs	../tifs/Snap-63809-Image Export-05.tif	1	TRUE	1033.13
EG4725	rep2	d1	tifs	../tifs/Snap-63808-Image Export-04.tif	0	TRUE	1027.95
EG4725	rep2	d1	tifs	../tifs/Snap-63839-Image Export-35.tif	0	TRUE	994.325
EG4725	rep2	d1	tifs	../tifs/Snap-63838-Image Export-34.tif	1	TRUE	1085.91
EG4725	rep2	d1	tifs	../tifs/Snap-63843-Image Export-39.tif	0	TRUE	977.938
EG4725	rep2	d1	tifs	../tifs/Snap-63811-Image Export-07.tif	1	TRUE	1075.81
EG4725	rep2	d1	tifs	../tifs/Snap-63811-Image Export-07.tif	2	TRUE	1012.99
EG4725	rep2	d1	tifs	../tifs/Snap-63842-Image Export-38.tif	0	TRUE	1036.03
EG4725	rep2	d1	tifs	../tifs/Snap-63842-Image Export-38.tif	1	TRUE	1003.26
EG4725	rep2	d1	tifs	../tifs/Snap-63810-Image Export-06.tif	0	TRUE	1069.88
MY2147	rep2	d1	tifs	../tifs/Snap-63882-Image Export-13.tif	0	TRUE	1020.09
MY2147	rep2	d1	tifs	../tifs/Snap-63885-Image Export-16.tif	1	TRUE	975.755
MY2147	rep2	d1	tifs	../tifs/Snap-63873-Image Export-04.tif	0	TRUE	926.151
MY2147	rep2	d1	tifs	../tifs/Snap-63880-Image Export-11.tif	0	TRUE	919.218
MY2147	rep2	d1	tifs	../tifs/Snap-63880-Image Export-11.tif	1	TRUE	1013.48
MY2147	rep2	d1	tifs	../tifs/Snap-63881-Image Export-12.tif	0	TRUE	980.934
MY2147	rep2	d1	tifs	../tifs/Snap-63881-Image Export-12.tif	1	TRUE	912.576
MY2147	rep2	d1	tifs	../tifs/Snap-63886-Image Export-17.tif	0	TRUE	956.151
MY2147	rep2	d1	tifs	../tifs/Snap-63884-Image Export-15.tif	0	TRUE	990.035
MY2147	rep2	d1	tifs	../tifs/Snap-63872-Image Export-03.tif	0	TRUE	984.688
MY2147	rep2	d1	tifs	../tifs/Snap-63875-Image Export-06.tif	0	TRUE	919.18
MY2147	rep2	d1	tifs	../tifs/Snap-63883-Image Export-14.tif	0	TRUE	1007.55
MY2147	rep2	d1	tifs	../tifs/Snap-63870-Image Export-01.tif	0	TRUE	996.118
MY2147	rep2	d1	tifs	../tifs/Snap-63871-Image Export-02.tif	0	TRUE	942.04
MY2147	rep2	d1	tifs	../tifs/Snap-63871-Image Export-02.tif	1	TRUE	995.49
MY2147	rep2	d1	tifs	../tifs/Snap-63876-Image Export-07.tif	0	TRUE	975.701
MY2147	rep2	d1	tifs	../tifs/Snap-63874-Image Export-05.tif	0	TRUE	927.3
MY2147	rep2	d1	tifs	../tifs/Snap-63898-Image Export-29.tif	0	TRUE	1029.11
MY2147	rep2	d1	tifs	../tifs/Snap-63898-Image Export-29.tif	1	TRUE	977.494
MY2147	rep2	d1	tifs	../tifs/Snap-63879-Image Export-10.tif	0	TRUE	977.808
MY2147	rep2	d1	tifs	../tifs/Snap-63879-Image Export-10.tif	1	TRUE	1011.12
MY2147	rep2	d1	tifs	../tifs/Snap-63897-Image Export-28.tif	0	TRUE	984.504
MY2147	rep2	d1	tifs	../tifs/Snap-63893-Image Export-24.tif	0	TRUE	1045.72
MY2147	rep2	d1	tifs	../tifs/Snap-63888-Image Export-19.tif	0	TRUE	856.353
MY2147	rep2	d1	tifs	../tifs/Snap-63888-Image Export-19.tif	1	TRUE	862.88
MY2147	rep2	d1	tifs	../tifs/Snap-63889-Image Export-20.tif	0	TRUE	1015.13
MY2147	rep2	d1	tifs	../tifs/Snap-63889-Image Export-20.tif	1	TRUE	1000.13
MY2147	rep2	d1	tifs	../tifs/Snap-63892-Image Export-23.tif	0	TRUE	937.895
MY2147	rep2	d1	tifs	../tifs/Snap-63890-Image Export-21.tif	0	TRUE	951.823
MY2147	rep2	d1	tifs	../tifs/Snap-63896-Image Export-27.tif	0	TRUE	1018.04
MY2147	rep2	d1	tifs	../tifs/Snap-63896-Image Export-27.tif	1	TRUE	1020.72
MY2147	rep2	d1	tifs	../tifs/Snap-63891-Image Export-22.tif	0	TRUE	1007.23
MY2147	rep2	d1	tifs	../tifs/Snap-63894-Image Export-25.tif	0	TRUE	1054.56
MY2147	rep2	d1	tifs	../tifs/Snap-63878-Image Export-09.tif	1	TRUE	1002.5
MY2147	rep2	d1	tifs	../tifs/Snap-63899-Image Export-30.tif	0	TRUE	972.499
MY2147	rep2	d1	tifs	../tifs/Snap-63899-Image Export-30.tif	1	TRUE	992.808
MY2147	rep2	d1	tifs	../tifs/Snap-63877-Image Export-08.tif	0	TRUE	1054.56
MY2147	rep2	d1	tifs	../tifs/Snap-63902-Image Export-33.tif	0	TRUE	952.489
MY2147	rep2	d1	tifs	../tifs/Snap-63900-Image Export-31.tif	0	TRUE	865.508
MY2147	rep2	d1	tifs	../tifs/Snap-63900-Image Export-31.tif	1	TRUE	981.156
MY2147	rep2	d1	tifs	../tifs/Snap-63901-Image Export-32.tif	0	TRUE	1045.28
MY2147	rep2	d1	tifs	../tifs/Snap-63901-Image Export-32.tif	1	TRUE	955.837
MY2147	rep2	d1	tifs	../tifs/Snap-63887-Image Export-18.tif	0	TRUE	899.89
NIC526	rep2	d1	tifs	../tifs/Snap-63796-Image Export-26.tif	0	TRUE	665.613
NIC526	rep2	d1	tifs	../tifs/Snap-63796-Image Export-26.tif	1	TRUE	819.88
NIC526	rep2	d1	tifs	../tifs/Snap-63797-Image Export-27.tif	0	TRUE	962.939
NIC526	rep2	d1	tifs	../tifs/Snap-63797-Image Export-27.tif	2	TRUE	812.334
NIC526	rep2	d1	tifs	../tifs/Snap-63778-Image Export-08.tif	4	TRUE	851.044
NIC526	rep2	d1	tifs	../tifs/Snap-63778-Image Export-08.tif	6	TRUE	960.793
NIC526	rep2	d1	tifs	../tifs/Snap-63778-Image Export-08.tif	7	TRUE	707.357
NIC526	rep2	d1	tifs	../tifs/Snap-63794-Image Export-24.tif	0	TRUE	971.649
NIC526	rep2	d1	tifs	../tifs/Snap-63779-Image Export-09.tif	0	TRUE	750.227
NIC526	rep2	d1	tifs	../tifs/Snap-63779-Image Export-09.tif	1	TRUE	848.141
NIC526	rep2	d1	tifs	../tifs/Snap-63779-Image Export-09.tif	2	TRUE	826.039
NIC526	rep2	d1	tifs	../tifs/Snap-63795-Image Export-25.tif	0	TRUE	998.967
NIC526	rep2	d1	tifs	../tifs/Snap-63793-Image Export-23.tif	0	TRUE	924.45
NIC526	rep2	d1	tifs	../tifs/Snap-63793-Image Export-23.tif	1	TRUE	848.769
NIC526	rep2	d1	tifs	../tifs/Snap-63790-Image Export-20.tif	0	TRUE	966.784
NIC526	rep2	d1	tifs	../tifs/Snap-63790-Image Export-20.tif	2	TRUE	1000.89
NIC526	rep2	d1	tifs	../tifs/Snap-63791-Image Export-21.tif	0	TRUE	984.818
NIC526	rep2	d1	tifs	../tifs/Snap-63791-Image Export-21.tif	1	TRUE	836.971
NIC526	rep2	d1	tifs	../tifs/Snap-63804-Image Export-34.tif	0	TRUE	878.232
NIC526	rep2	d1	tifs	../tifs/Snap-63804-Image Export-34.tif	1	TRUE	753.981
NIC526	rep2	d1	tifs	../tifs/Snap-63804-Image Export-34.tif	2	TRUE	950.88
NIC526	rep2	d1	tifs	../tifs/Snap-63788-Image Export-18.tif	0	TRUE	747.806
NIC526	rep2	d1	tifs	../tifs/Snap-63788-Image Export-18.tif	1	TRUE	741.739
NIC526	rep2	d1	tifs	../tifs/Snap-63789-Image Export-19.tif	0	TRUE	931.736
NIC526	rep2	d1	tifs	../tifs/Snap-63789-Image Export-19.tif	1	TRUE	987.093
NIC526	rep2	d1	tifs	../tifs/Snap-63800-Image Export-30.tif	2	TRUE	870.594
NIC526	rep2	d1	tifs	../tifs/Snap-63801-Image Export-31.tif	0	TRUE	1019.74
NIC526	rep2	d1	tifs	../tifs/Snap-63801-Image Export-31.tif	2	TRUE	793.672
NIC526	rep2	d1	tifs	../tifs/Snap-63802-Image Export-32.tif	1	TRUE	679.985
NIC526	rep2	d1	tifs	../tifs/Snap-63802-Image Export-32.tif	4	TRUE	813.314
NIC526	rep2	d1	tifs	../tifs/Snap-63802-Image Export-32.tif	5	TRUE	922.175
NIC526	rep2	d1	tifs	../tifs/Snap-63803-Image Export-33.tif	0	TRUE	719.415
NIC526	rep2	d1	tifs	../tifs/Snap-63777-Image Export-07.tif	0	TRUE	822.193
NIC526	rep2	d1	tifs	../tifs/Snap-63776-Image Export-06.tif	0	TRUE	889.624
NIC526	rep2	d1	tifs	../tifs/Snap-63799-Image Export-29.tif	0	TRUE	1013.3
NIC526	rep2	d1	tifs	../tifs/Snap-63799-Image Export-29.tif	1	TRUE	817.421
NIC526	rep2	d1	tifs	../tifs/Snap-63799-Image Export-29.tif	2	TRUE	619.395
NIC526	rep2	d1	tifs	../tifs/Snap-63775-Image Export-05.tif	0	TRUE	910.875
NIC526	rep2	d1	tifs	../tifs/Snap-63798-Image Export-28.tif	0	TRUE	853.818
NIC526	rep2	d1	tifs	../tifs/Snap-63774-Image Export-04.tif	0	TRUE	808.58
NIC526	rep2	d1	tifs	../tifs/Snap-63773-Image Export-03.tif	0	TRUE	968.654
NIC526	rep2	d1	tifs	../tifs/Snap-63772-Image Export-02.tif	0	TRUE	963.291
NIC526	rep2	d1	tifs	../tifs/Snap-63771-Image Export-01.tif	0	TRUE	891.049
NIC526	rep2	d1	tifs	../tifs/Snap-63787-Image Export-17.tif	0	TRUE	930.48
NIC526	rep2	d1	tifs	../tifs/Snap-63787-Image Export-17.tif	1	TRUE	955.209
NIC526	rep2	d1	tifs	../tifs/Snap-63787-Image Export-17.tif	3	TRUE	845.551
NIC526	rep2	d1	tifs	../tifs/Snap-63787-Image Export-17.tif	4	TRUE	772.497
NIC526	rep2	d1	tifs	../tifs/Snap-63786-Image Export-16.tif	0	TRUE	989.905
NIC526	rep2	d1	tifs	../tifs/Snap-63786-Image Export-16.tif	1	TRUE	946.146
NIC526	rep2	d1	tifs	../tifs/Snap-63786-Image Export-16.tif	2	TRUE	667.797
NIC526	rep2	d1	tifs	../tifs/Snap-63786-Image Export-16.tif	3	TRUE	696.463
NIC526	rep2	d1	tifs	../tifs/Snap-63785-Image Export-15.tif	0	TRUE	889.884
NIC526	rep2	d1	tifs	../tifs/Snap-63785-Image Export-15.tif	1	TRUE	852.745
NIC526	rep2	d1	tifs	../tifs/Snap-63784-Image Export-14.tif	0	TRUE	973.832
NIC526	rep2	d1	tifs	../tifs/Snap-63784-Image Export-14.tif	1	TRUE	793.58
NIC526	rep2	d1	tifs	../tifs/Snap-63783-Image Export-13.tif	0	TRUE	908.416
NIC526	rep2	d1	tifs	../tifs/Snap-63782-Image Export-12.tif	0	TRUE	942.798
NIC526	rep2	d1	tifs	../tifs/Snap-63782-Image Export-12.tif	1	TRUE	990.533
NIC526	rep2	d1	tifs	../tifs/Snap-63781-Image Export-11.tif	0	TRUE	799.609
NIC526	rep2	d1	tifs	../tifs/Snap-63781-Image Export-11.tif	1	TRUE	710.299
NIC526	rep2	d1	tifs	../tifs/Snap-63781-Image Export-11.tif	2	TRUE	918.161
NIC526	rep2	d1	tifs	../tifs/Snap-63781-Image Export-11.tif	3	TRUE	713.831
NIC526	rep2	d1	tifs	../tifs/Snap-63781-Image Export-11.tif	4	TRUE	1008.97
NIC526	rep2	d1	tifs	../tifs/Snap-63780-Image Export-10.tif	0	TRUE	957.316
DL238	rep4	d1	tifs	../tifs/Snap-64151-Image Export-03.tif	0	TRUE	897.262
DL238	rep4	d1	tifs	../tifs/Snap-64151-Image Export-03.tif	1	TRUE	922.083
DL238	rep4	d1	tifs	../tifs/Snap-64150-Image Export-02.tif	1	TRUE	929.277
DL238	rep4	d1	tifs	../tifs/Snap-64150-Image Export-02.tif	3	TRUE	906.547
DL238	rep4	d1	tifs	../tifs/Snap-64150-Image Export-02.tif	4	TRUE	891.363
DL238	rep4	d1	tifs	../tifs/Snap-64150-Image Export-02.tif	5	TRUE	901.46
DL238	rep4	d1	tifs	../tifs/Snap-64149-Image Export-01.tif	0	TRUE	926.596
DL238	rep4	d1	tifs	../tifs/Snap-64155-Image Export-07.tif	1	TRUE	893.01
DL238	rep4	d1	tifs	../tifs/Snap-64154-Image Export-06.tif	0	TRUE	865.378
DL238	rep4	d1	tifs	../tifs/Snap-64154-Image Export-06.tif	1	TRUE	911.948
DL238	rep4	d1	tifs	../tifs/Snap-64154-Image Export-06.tif	2	TRUE	927.04
DL238	rep4	d1	tifs	../tifs/Snap-64154-Image Export-06.tif	3	TRUE	891.585
DL238	rep4	d1	tifs	../tifs/Snap-64154-Image Export-06.tif	4	TRUE	885.556
DL238	rep4	d1	tifs	../tifs/Snap-64179-Image Export-31.tif	0	TRUE	957.446
DL238	rep4	d1	tifs	../tifs/Snap-64179-Image Export-31.tif	1	TRUE	881.228
DL238	rep4	d1	tifs	../tifs/Snap-64178-Image Export-30.tif	0	TRUE	972.982
DL238	rep4	d1	tifs	../tifs/Snap-64178-Image Export-30.tif	1	TRUE	921.233
DL238	rep4	d1	tifs	../tifs/Snap-64166-Image Export-18.tif	0	TRUE	835.01
DL238	rep4	d1	tifs	../tifs/Snap-64166-Image Export-18.tif	1	TRUE	921.547
DL238	rep4	d1	tifs	../tifs/Snap-64167-Image Export-19.tif	1	TRUE	942.89
DL238	rep4	d1	tifs	../tifs/Snap-64152-Image Export-04.tif	0	TRUE	959.407
DL238	rep4	d1	tifs	../tifs/Snap-64152-Image Export-04.tif	1	TRUE	903.736
DL238	rep4	d1	tifs	../tifs/Snap-64152-Image Export-04.tif	2	TRUE	906.233
DL238	rep4	d1	tifs	../tifs/Snap-64153-Image Export-05.tif	0	TRUE	938.47
DL238	rep4	d1	tifs	../tifs/Snap-64153-Image Export-05.tif	2	TRUE	911.098
DL238	rep4	d1	tifs	../tifs/Snap-64153-Image Export-05.tif	3	TRUE	919.624
DL238	rep4	d1	tifs	../tifs/Snap-64181-Image Export-33.tif	0	TRUE	910.875
DL238	rep4	d1	tifs	../tifs/Snap-64181-Image Export-33.tif	1	TRUE	924.45
DL238	rep4	d1	tifs	../tifs/Snap-64181-Image Export-33.tif	2	TRUE	885.242
DL238	rep4	d1	tifs	../tifs/Snap-64180-Image Export-32.tif	0	TRUE	839.392
DL238	rep4	d1	tifs	../tifs/Snap-64180-Image Export-32.tif	1	TRUE	888.682
DL238	rep4	d1	tifs	../tifs/Snap-64192-Image Export-44.tif	0	TRUE	957.093
DL238	rep4	d1	tifs	../tifs/Snap-64192-Image Export-44.tif	1	TRUE	803.049
DL238	rep4	d1	tifs	../tifs/Snap-64192-Image Export-44.tif	2	TRUE	923.378
DL238	rep4	d1	tifs	../tifs/Snap-64172-Image Export-24.tif	0	TRUE	924.895
DL238	rep4	d1	tifs	../tifs/Snap-64172-Image Export-24.tif	1	TRUE	949.103
DL238	rep4	d1	tifs	../tifs/Snap-64185-Image Export-37.tif	0	TRUE	878.01
DL238	rep4	d1	tifs	../tifs/Snap-64173-Image Export-25.tif	0	TRUE	933.605
DL238	rep4	d1	tifs	../tifs/Snap-64173-Image Export-25.tif	1	TRUE	963.291
DL238	rep4	d1	tifs	../tifs/Snap-64184-Image Export-36.tif	0	TRUE	907.397
DL238	rep4	d1	tifs	../tifs/Snap-64184-Image Export-36.tif	1	TRUE	910.913
DL238	rep4	d1	tifs	../tifs/Snap-64184-Image Export-36.tif	2	TRUE	967.489
DL238	rep4	d1	tifs	../tifs/Snap-64171-Image Export-23.tif	0	TRUE	897.745
DL238	rep4	d1	tifs	../tifs/Snap-64171-Image Export-23.tif	2	TRUE	820.102
DL238	rep4	d1	tifs	../tifs/Snap-64170-Image Export-22.tif	1	TRUE	915.388
DL238	rep4	d1	tifs	../tifs/Snap-64170-Image Export-22.tif	2	TRUE	930.204
DL238	rep4	d1	tifs	../tifs/Snap-64188-Image Export-40.tif	0	TRUE	884.484
DL238	rep4	d1	tifs	../tifs/Snap-64188-Image Export-40.tif	1	TRUE	896.986
DL238	rep4	d1	tifs	../tifs/Snap-64188-Image Export-40.tif	2	TRUE	965.528
DL238	rep4	d1	tifs	../tifs/Snap-64175-Image Export-27.tif	0	TRUE	928.204
DL238	rep4	d1	tifs	../tifs/Snap-64175-Image Export-27.tif	1	TRUE	939.895
DL238	rep4	d1	tifs	../tifs/Snap-64169-Image Export-21.tif	0	TRUE	952.007
DL238	rep4	d1	tifs	../tifs/Snap-64169-Image Export-21.tif	1	TRUE	803.846
DL238	rep4	d1	tifs	../tifs/Snap-64182-Image Export-34.tif	0	TRUE	910.431
DL238	rep4	d1	tifs	../tifs/Snap-64182-Image Export-34.tif	1	TRUE	929.407
DL238	rep4	d1	tifs	../tifs/Snap-64174-Image Export-26.tif	0	TRUE	960.977
DL238	rep4	d1	tifs	../tifs/Snap-64174-Image Export-26.tif	2	TRUE	910.377
DL238	rep4	d1	tifs	../tifs/Snap-64168-Image Export-20.tif	0	TRUE	931.682
DL238	rep4	d1	tifs	../tifs/Snap-64168-Image Export-20.tif	1	TRUE	947.755
DL238	rep4	d1	tifs	../tifs/Snap-64183-Image Export-35.tif	0	TRUE	911.282
DL238	rep4	d1	tifs	../tifs/Snap-64159-Image Export-11.tif	0	TRUE	904.31
DL238	rep4	d1	tifs	../tifs/Snap-64159-Image Export-11.tif	1	TRUE	910.025
DL238	rep4	d1	tifs	../tifs/Snap-64191-Image Export-43.tif	0	TRUE	895.653
DL238	rep4	d1	tifs	../tifs/Snap-64191-Image Export-43.tif	1	TRUE	917.311
DL238	rep4	d1	tifs	../tifs/Snap-64191-Image Export-43.tif	2	TRUE	912.89
DL238	rep4	d1	tifs	../tifs/Snap-64191-Image Export-43.tif	3	TRUE	914.185
DL238	rep4	d1	tifs	../tifs/Snap-64158-Image Export-10.tif	0	TRUE	917.663
DL238	rep4	d1	tifs	../tifs/Snap-64158-Image Export-10.tif	1	TRUE	914.407
DL238	rep4	d1	tifs	../tifs/Snap-64190-Image Export-42.tif	0	TRUE	899.76
DL238	rep4	d1	tifs	../tifs/Snap-64190-Image Export-42.tif	1	TRUE	878.455
DL238	rep4	d1	tifs	../tifs/Snap-64177-Image Export-29.tif	1	TRUE	925.431
DL238	rep4	d1	tifs	../tifs/Snap-64176-Image Export-28.tif	0	TRUE	945.702
DL238	rep4	d1	tifs	../tifs/Snap-64176-Image Export-28.tif	2	TRUE	908.286
DL238	rep4	d1	tifs	../tifs/Snap-64176-Image Export-28.tif	3	TRUE	851.672
DL238	rep4	d1	tifs	../tifs/Snap-64187-Image Export-39.tif	0	TRUE	876.992
DL238	rep4	d1	tifs	../tifs/Snap-64186-Image Export-38.tif	0	TRUE	706.062
DL238	rep4	d1	tifs	../tifs/Snap-64160-Image Export-12.tif	0	TRUE	907.842
DL238	rep4	d1	tifs	../tifs/Snap-64160-Image Export-12.tif	1	TRUE	920.03
DL238	rep4	d1	tifs	../tifs/Snap-64161-Image Export-13.tif	0	TRUE	907.305
DL238	rep4	d1	tifs	../tifs/Snap-64165-Image Export-17.tif	0	TRUE	933.735
DL238	rep4	d1	tifs	../tifs/Snap-64157-Image Export-09.tif	0	TRUE	911.098
DL238	rep4	d1	tifs	../tifs/Snap-64157-Image Export-09.tif	2	TRUE	950.03
DL238	rep4	d1	tifs	../tifs/Snap-64156-Image Export-08.tif	0	TRUE	938.654
DL238	rep4	d1	tifs	../tifs/Snap-64156-Image Export-08.tif	2	TRUE	929.499
DL238	rep4	d1	tifs	../tifs/Snap-64163-Image Export-15.tif	2	TRUE	871.093
DL238	rep4	d1	tifs	../tifs/Snap-64162-Image Export-14.tif	0	TRUE	920.658
DL238	rep4	d1	tifs	../tifs/Snap-64162-Image Export-14.tif	1	TRUE	931.866
EG4725	rep4	d1	tifs	../tifs/Snap-64220-Image Export-28.tif	0	TRUE	999.282
EG4725	rep4	d1	tifs	../tifs/Snap-64215-Image Export-23.tif	0	TRUE	1047.11
EG4725	rep4	d1	tifs	../tifs/Snap-64214-Image Export-22.tif	0	TRUE	1041.88
EG4725	rep4	d1	tifs	../tifs/Snap-64214-Image Export-22.tif	1	TRUE	1035.31
EG4725	rep4	d1	tifs	../tifs/Snap-64214-Image Export-22.tif	2	TRUE	967.045
EG4725	rep4	d1	tifs	../tifs/Snap-64221-Image Export-29.tif	0	TRUE	1044.11
EG4725	rep4	d1	tifs	../tifs/Snap-64210-Image Export-18.tif	0	TRUE	1054.43
EG4725	rep4	d1	tifs	../tifs/Snap-64210-Image Export-18.tif	1	TRUE	1032.91
EG4725	rep4	d1	tifs	../tifs/Snap-64210-Image Export-18.tif	2	TRUE	1115.34
EG4725	rep4	d1	tifs	../tifs/Snap-64211-Image Export-19.tif	0	TRUE	1041.97
EG4725	rep4	d1	tifs	../tifs/Snap-64211-Image Export-19.tif	1	TRUE	1085.63
EG4725	rep4	d1	tifs	../tifs/Snap-64211-Image Export-19.tif	3	TRUE	1061.04
EG4725	rep4	d1	tifs	../tifs/Snap-64211-Image Export-19.tif	4	TRUE	1046.83
EG4725	rep4	d1	tifs	../tifs/Snap-64212-Image Export-20.tif	1	TRUE	1091.94
EG4725	rep4	d1	tifs	../tifs/Snap-64212-Image Export-20.tif	2	TRUE	1060.81
EG4725	rep4	d1	tifs	../tifs/Snap-64213-Image Export-21.tif	0	TRUE	1066.66
EG4725	rep4	d1	tifs	../tifs/Snap-64213-Image Export-21.tif	2	TRUE	1060.94
EG4725	rep4	d1	tifs	../tifs/Snap-64216-Image Export-24.tif	0	TRUE	1092.51
EG4725	rep4	d1	tifs	../tifs/Snap-64216-Image Export-24.tif	1	TRUE	1053.05
EG4725	rep4	d1	tifs	../tifs/Snap-64217-Image Export-25.tif	0	TRUE	1006.44
EG4725	rep4	d1	tifs	../tifs/Snap-64217-Image Export-25.tif	1	TRUE	1070.41
EG4725	rep4	d1	tifs	../tifs/Snap-64219-Image Export-27.tif	0	TRUE	1023.08
EG4725	rep4	d1	tifs	../tifs/Snap-64218-Image Export-26.tif	0	TRUE	1069.3
EG4725	rep4	d1	tifs	../tifs/Snap-64200-Image Export-08.tif	0	TRUE	1035.27
EG4725	rep4	d1	tifs	../tifs/Snap-64200-Image Export-08.tif	1	TRUE	1012.91
EG4725	rep4	d1	tifs	../tifs/Snap-64201-Image Export-09.tif	0	TRUE	1067.29
EG4725	rep4	d1	tifs	../tifs/Snap-64230-Image Export-38.tif	1	TRUE	1085.82
EG4725	rep4	d1	tifs	../tifs/Snap-64230-Image Export-38.tif	2	TRUE	1100.82
EG4725	rep4	d1	tifs	../tifs/Snap-64230-Image Export-38.tif	3	TRUE	1016.65
EG4725	rep4	d1	tifs	../tifs/Snap-64231-Image Export-39.tif	3	TRUE	1083.23
EG4725	rep4	d1	tifs	../tifs/Snap-64231-Image Export-39.tif	4	TRUE	1062.42
EG4725	rep4	d1	tifs	../tifs/Snap-64231-Image Export-39.tif	5	TRUE	1046.57
EG4725	rep4	d1	tifs	../tifs/Snap-64199-Image Export-07.tif	0	TRUE	1050.9
EG4725	rep4	d1	tifs	../tifs/Snap-64199-Image Export-07.tif	1	TRUE	1056.49
EG4725	rep4	d1	tifs	../tifs/Snap-64203-Image Export-11.tif	2	TRUE	1067.01
EG4725	rep4	d1	tifs	../tifs/Snap-64203-Image Export-11.tif	3	TRUE	1021.25
EG4725	rep4	d1	tifs	../tifs/Snap-64198-Image Export-06.tif	1	TRUE	1037.55
EG4725	rep4	d1	tifs	../tifs/Snap-64198-Image Export-06.tif	3	TRUE	1076.13
EG4725	rep4	d1	tifs	../tifs/Snap-64202-Image Export-10.tif	2	TRUE	1037.55
EG4725	rep4	d1	tifs	../tifs/Snap-64228-Image Export-36.tif	1	TRUE	986.649
EG4725	rep4	d1	tifs	../tifs/Snap-64228-Image Export-36.tif	3	TRUE	1033.44
EG4725	rep4	d1	tifs	../tifs/Snap-64229-Image Export-37.tif	1	TRUE	1063
EG4725	rep4	d1	tifs	../tifs/Snap-64207-Image Export-15.tif	0	TRUE	1050.49
EG4725	rep4	d1	tifs	../tifs/Snap-64206-Image Export-14.tif	0	TRUE	1058.19
EG4725	rep4	d1	tifs	../tifs/Snap-64206-Image Export-14.tif	1	TRUE	1076.26
EG4725	rep4	d1	tifs	../tifs/Snap-64206-Image Export-14.tif	2	TRUE	1104.22
EG4725	rep4	d1	tifs	../tifs/Snap-64206-Image Export-14.tif	3	TRUE	1073.32
EG4725	rep4	d1	tifs	../tifs/Snap-64204-Image Export-12.tif	0	TRUE	1078.18
EG4725	rep4	d1	tifs	../tifs/Snap-64204-Image Export-12.tif	2	TRUE	1057.95
EG4725	rep4	d1	tifs	../tifs/Snap-64204-Image Export-12.tif	3	TRUE	946.422
EG4725	rep4	d1	tifs	../tifs/Snap-64205-Image Export-13.tif	0	TRUE	1040.58
EG4725	rep4	d1	tifs	../tifs/Snap-64205-Image Export-13.tif	1	TRUE	1048.44
EG4725	rep4	d1	tifs	../tifs/Snap-64224-Image Export-32.tif	0	TRUE	1133.81
EG4725	rep4	d1	tifs	../tifs/Snap-64224-Image Export-32.tif	1	TRUE	1080.64
EG4725	rep4	d1	tifs	../tifs/Snap-64224-Image Export-32.tif	2	TRUE	1105.46
EG4725	rep4	d1	tifs	../tifs/Snap-64225-Image Export-33.tif	0	TRUE	1030.63
EG4725	rep4	d1	tifs	../tifs/Snap-64225-Image Export-33.tif	1	TRUE	1063.49
EG4725	rep4	d1	tifs	../tifs/Snap-64195-Image Export-03.tif	0	TRUE	1049.51
EG4725	rep4	d1	tifs	../tifs/Snap-64194-Image Export-02.tif	0	TRUE	1070.06
EG4725	rep4	d1	tifs	../tifs/Snap-64194-Image Export-02.tif	1	TRUE	984.634
EG4725	rep4	d1	tifs	../tifs/Snap-64223-Image Export-31.tif	0	TRUE	1085.99
EG4725	rep4	d1	tifs	../tifs/Snap-64222-Image Export-30.tif	1	TRUE	1043.71
EG4725	rep4	d1	tifs	../tifs/Snap-64208-Image Export-16.tif	1	TRUE	1083.36
EG4725	rep4	d1	tifs	../tifs/Snap-64208-Image Export-16.tif	3	TRUE	1049.42
EG4725	rep4	d1	tifs	../tifs/Snap-64209-Image Export-17.tif	1	TRUE	1051.75
EG4725	rep4	d1	tifs	../tifs/Snap-64193-Image Export-01.tif	0	TRUE	1011.12
EG4725	rep4	d1	tifs	../tifs/Snap-64193-Image Export-01.tif	1	TRUE	1066.08
EG4725	rep4	d1	tifs	../tifs/Snap-64227-Image Export-35.tif	0	TRUE	1050.27
EG4725	rep4	d1	tifs	../tifs/Snap-64226-Image Export-34.tif	0	TRUE	1090.28
EG4725	rep4	d1	tifs	../tifs/Snap-64196-Image Export-04.tif	0	TRUE	1049.35
EG4725	rep4	d1	tifs	../tifs/Snap-64197-Image Export-05.tif	1	TRUE	842.426
EG4725	rep4	d1	tifs	../tifs/Snap-64197-Image Export-05.tif	2	TRUE	1008.44
MY2147	rep4	d1	tifs	../tifs/Snap-64258-Image Export-26.tif	1	TRUE	992.64
MY2147	rep4	d1	tifs	../tifs/Snap-64258-Image Export-26.tif	2	TRUE	948.291
MY2147	rep4	d1	tifs	../tifs/Snap-64259-Image Export-27.tif	0	TRUE	1012.5
MY2147	rep4	d1	tifs	../tifs/Snap-64239-Image Export-07.tif	0	TRUE	1014.24
MY2147	rep4	d1	tifs	../tifs/Snap-64238-Image Export-06.tif	0	TRUE	1028.26
MY2147	rep4	d1	tifs	../tifs/Snap-64241-Image Export-09.tif	0	TRUE	1013.08
MY2147	rep4	d1	tifs	../tifs/Snap-64240-Image Export-08.tif	0	TRUE	1082.92
MY2147	rep4	d1	tifs	../tifs/Snap-64240-Image Export-08.tif	1	TRUE	957.316
MY2147	rep4	d1	tifs	../tifs/Snap-64232-Image Export-01.tif	0	TRUE	973.388
MY2147	rep4	d1	tifs	../tifs/Snap-64251-Image Export-19.tif	0	TRUE	963.161
MY2147	rep4	d1	tifs	../tifs/Snap-64236-Image Export-04.tif	0	TRUE	991.291
MY2147	rep4	d1	tifs	../tifs/Snap-64250-Image Export-18.tif	0	TRUE	1046.04
MY2147	rep4	d1	tifs	../tifs/Snap-64250-Image Export-18.tif	2	TRUE	977.18
MY2147	rep4	d1	tifs	../tifs/Snap-64250-Image Export-18.tif	3	TRUE	1004.55
MY2147	rep4	d1	tifs	../tifs/Snap-64237-Image Export-05.tif	0	TRUE	1040.8
MY2147	rep4	d1	tifs	../tifs/Snap-64261-Image Export-29.tif	1	TRUE	964.049
MY2147	rep4	d1	tifs	../tifs/Snap-64261-Image Export-29.tif	2	TRUE	1025.14
MY2147	rep4	d1	tifs	../tifs/Snap-64261-Image Export-29.tif	3	TRUE	986.243
MY2147	rep4	d1	tifs	../tifs/Snap-64254-Image Export-22.tif	1	TRUE	972.407
MY2147	rep4	d1	tifs	../tifs/Snap-64254-Image Export-22.tif	2	TRUE	903.237
MY2147	rep4	d1	tifs	../tifs/Snap-64255-Image Export-23.tif	1	TRUE	1031.61
MY2147	rep4	d1	tifs	../tifs/Snap-64255-Image Export-23.tif	2	TRUE	1029.61
MY2147	rep4	d1	tifs	../tifs/Snap-64255-Image Export-23.tif	3	TRUE	1010.21
MY2147	rep4	d1	tifs	../tifs/Snap-64260-Image Export-28.tif	0	TRUE	1048.4
MY2147	rep4	d1	tifs	../tifs/Snap-64260-Image Export-28.tif	1	TRUE	1015.63
MY2147	rep4	d1	tifs	../tifs/Snap-64260-Image Export-28.tif	2	TRUE	1029.61
MY2147	rep4	d1	tifs	../tifs/Snap-64235-Image Export-03.tif	0	TRUE	1028.08
MY2147	rep4	d1	tifs	../tifs/Snap-64234-Image Export-02.tif	1	TRUE	1012.06
MY2147	rep4	d1	tifs	../tifs/Snap-64257-Image Export-25.tif	2	TRUE	1010.14
MY2147	rep4	d1	tifs	../tifs/Snap-64257-Image Export-25.tif	3	TRUE	969.098
MY2147	rep4	d1	tifs	../tifs/Snap-64257-Image Export-25.tif	4	TRUE	976.996
MY2147	rep4	d1	tifs	../tifs/Snap-64256-Image Export-24.tif	1	TRUE	1047.33
MY2147	rep4	d1	tifs	../tifs/Snap-64256-Image Export-24.tif	2	TRUE	997.857
MY2147	rep4	d1	tifs	../tifs/Snap-64256-Image Export-24.tif	5	TRUE	985.668
MY2147	rep4	d1	tifs	../tifs/Snap-64253-Image Export-21.tif	0	TRUE	1002.81
MY2147	rep4	d1	tifs	../tifs/Snap-64253-Image Export-21.tif	1	TRUE	982.451
MY2147	rep4	d1	tifs	../tifs/Snap-64253-Image Export-21.tif	2	TRUE	994.287
MY2147	rep4	d1	tifs	../tifs/Snap-64252-Image Export-20.tif	0	TRUE	992.808
MY2147	rep4	d1	tifs	../tifs/Snap-64252-Image Export-20.tif	3	TRUE	1038.53
MY2147	rep4	d1	tifs	../tifs/Snap-64265-Image Export-33.tif	0	TRUE	981.47
MY2147	rep4	d1	tifs	../tifs/Snap-64265-Image Export-33.tif	1	TRUE	1019.15
MY2147	rep4	d1	tifs	../tifs/Snap-64265-Image Export-33.tif	2	TRUE	955.653
MY2147	rep4	d1	tifs	../tifs/Snap-64264-Image Export-32.tif	0	TRUE	1062.55
MY2147	rep4	d1	tifs	../tifs/Snap-64266-Image Export-34.tif	0	TRUE	1009.51
MY2147	rep4	d1	tifs	../tifs/Snap-64249-Image Export-17.tif	1	TRUE	1071.71
MY2147	rep4	d1	tifs	../tifs/Snap-64249-Image Export-17.tif	2	TRUE	1047.15
MY2147	rep4	d1	tifs	../tifs/Snap-64248-Image Export-16.tif	0	TRUE	1025.77
MY2147	rep4	d1	tifs	../tifs/Snap-64248-Image Export-16.tif	1	TRUE	982.987
MY2147	rep4	d1	tifs	../tifs/Snap-64262-Image Export-30.tif	0	TRUE	984.726
MY2147	rep4	d1	tifs	../tifs/Snap-64262-Image Export-30.tif	1	TRUE	988.074
MY2147	rep4	d1	tifs	../tifs/Snap-64263-Image Export-31.tif	0	TRUE	1022.33
MY2147	rep4	d1	tifs	../tifs/Snap-64246-Image Export-14.tif	0	TRUE	1016.11
MY2147	rep4	d1	tifs	../tifs/Snap-64246-Image Export-14.tif	1	TRUE	935.919
MY2147	rep4	d1	tifs	../tifs/Snap-64247-Image Export-15.tif	0	TRUE	1029.74
MY2147	rep4	d1	tifs	../tifs/Snap-64247-Image Export-15.tif	2	TRUE	1026.21
MY2147	rep4	d1	tifs	../tifs/Snap-64243-Image Export-11.tif	0	TRUE	1038.8
MY2147	rep4	d1	tifs	../tifs/Snap-64243-Image Export-11.tif	2	TRUE	1022.1
MY2147	rep4	d1	tifs	../tifs/Snap-64245-Image Export-13.tif	0	TRUE	1032.02
MY2147	rep4	d1	tifs	../tifs/Snap-64245-Image Export-13.tif	1	TRUE	1024.69
MY2147	rep4	d1	tifs	../tifs/Snap-64244-Image Export-12.tif	0	TRUE	1030.98
MY2147	rep4	d1	tifs	../tifs/Snap-64244-Image Export-12.tif	2	TRUE	817.29
NIC526	rep4	d1	tifs	../tifs/Snap-64135-Image Export-08.tif	2	TRUE	1026.43
NIC526	rep4	d1	tifs	../tifs/Snap-64135-Image Export-08.tif	5	TRUE	947.939
NIC526	rep4	d1	tifs	../tifs/Snap-64136-Image Export-09.tif	1	TRUE	963.345
NIC526	rep4	d1	tifs	../tifs/Snap-64136-Image Export-09.tif	2	TRUE	807.822
NIC526	rep4	d1	tifs	../tifs/Snap-64141-Image Export-14.tif	2	TRUE	813.981
NIC526	rep4	d1	tifs	../tifs/Snap-64141-Image Export-14.tif	3	TRUE	927.576
NIC526	rep4	d1	tifs	../tifs/Snap-64143-Image Export-16.tif	0	TRUE	960.924
NIC526	rep4	d1	tifs	../tifs/Snap-64143-Image Export-16.tif	1	TRUE	916.44
NIC526	rep4	d1	tifs	../tifs/Snap-64142-Image Export-15.tif	1	TRUE	994.953
NIC526	rep4	d1	tifs	../tifs/Snap-64140-Image Export-13.tif	0	TRUE	937.619
NIC526	rep4	d1	tifs	../tifs/Snap-64144-Image Export-17.tif	0	TRUE	825.151
NIC526	rep4	d1	tifs	../tifs/Snap-64144-Image Export-17.tif	1	TRUE	811.131
NIC526	rep4	d1	tifs	../tifs/Snap-64144-Image Export-17.tif	3	TRUE	786.072
NIC526	rep4	d1	tifs	../tifs/Snap-64144-Image Export-17.tif	4	TRUE	837.691
NIC526	rep4	d1	tifs	../tifs/Snap-64138-Image Export-11.tif	0	TRUE	984.152
NIC526	rep4	d1	tifs	../tifs/Snap-64146-Image Export-19.tif	0	TRUE	955.078
NIC526	rep4	d1	tifs	../tifs/Snap-64145-Image Export-18.tif	0	TRUE	934.233
NIC526	rep4	d1	tifs	../tifs/Snap-64139-Image Export-12.tif	0	TRUE	996.156
NIC526	rep4	d1	tifs	../tifs/Snap-64147-Image Export-20.tif	0	TRUE	834.213
NIC526	rep4	d1	tifs	../tifs/Snap-64147-Image Export-20.tif	1	TRUE	919.586
NIC526	rep4	d1	tifs	../tifs/Snap-64132-Image Export-05.tif	1	TRUE	932.441
NIC526	rep4	d1	tifs	../tifs/Snap-64132-Image Export-05.tif	3	TRUE	879.527
NIC526	rep4	d1	tifs	../tifs/Snap-64132-Image Export-05.tif	5	TRUE	796.43
NIC526	rep4	d1	tifs	../tifs/Snap-64132-Image Export-05.tif	6	TRUE	842.426
NIC526	rep4	d1	tifs	../tifs/Snap-64148-Image Export-21.tif	0	TRUE	917.977
NIC526	rep4	d1	tifs	../tifs/Snap-64148-Image Export-21.tif	1	TRUE	861.846
NIC526	rep4	d1	tifs	../tifs/Snap-64133-Image Export-06.tif	6	TRUE	943.426
NIC526	rep4	d1	tifs	../tifs/Snap-64133-Image Export-06.tif	7	TRUE	958.426
NIC526	rep4	d1	tifs	../tifs/Snap-64133-Image Export-06.tif	9	TRUE	972.223
NIC526	rep4	d1	tifs	../tifs/Snap-64133-Image Export-06.tif	11	TRUE	819.972
NIC526	rep4	d1	tifs	../tifs/Snap-64131-Image Export-04.tif	0	TRUE	966.731
NIC526	rep4	d1	tifs	../tifs/Snap-64131-Image Export-04.tif	1	TRUE	820.232
NIC526	rep4	d1	tifs	../tifs/Snap-64131-Image Export-04.tif	2	TRUE	919.364
NIC526	rep4	d1	tifs	../tifs/Snap-64137-Image Export-10.tif	0	TRUE	1002.54
NIC526	rep4	d1	tifs	../tifs/Snap-64137-Image Export-10.tif	1	TRUE	988.648
NIC526	rep4	d1	tifs	../tifs/Snap-64137-Image Export-10.tif	5	TRUE	978.659
NIC526	rep4	d1	tifs	../tifs/Snap-64134-Image Export-07.tif	0	TRUE	959.461
NIC526	rep4	d1	tifs	../tifs/Snap-64134-Image Export-07.tif	1	TRUE	960.035
NIC526	rep4	d1	tifs	../tifs/Snap-64134-Image Export-07.tif	4	TRUE	919.532
NIC526	rep4	d1	tifs	../tifs/Snap-64134-Image Export-07.tif	6	TRUE	826.039
NIC526	rep4	d1	tifs	../tifs/Snap-64134-Image Export-07.tif	8	TRUE	931.996
NIC526	rep4	d1	tifs	../tifs/Snap-64128-Image Export-01.tif	0	TRUE	920.566
NIC526	rep4	d1	tifs	../tifs/Snap-64128-Image Export-01.tif	1	TRUE	919.18
NIC526	rep4	d1	tifs	../tifs/Snap-64129-Image Export-02.tif	0	TRUE	949.992
NIC526	rep4	d1	tifs	../tifs/Snap-64130-Image Export-03.tif	1	TRUE	954.948
NIC526	rep4	d1	tifs	../tifs/Snap-64130-Image Export-03.tif	2	TRUE	835.638
DL238	rep2	d12	tifs	../tifs/Snap-65325-Image Export-23.tif	0	TRUE	278.655
DL238	rep2	d12	tifs	../tifs/Snap-65325-Image Export-23.tif	1	TRUE	686.153
DL238	rep2	d12	tifs	../tifs/Snap-65325-Image Export-23.tif	3	TRUE	493.787
DL238	rep2	d12	tifs	../tifs/Snap-65324-Image Export-22.tif	2	TRUE	452.225
DL238	rep2	d12	tifs	../tifs/Snap-65324-Image Export-22.tif	3	TRUE	261.335
DL238	rep2	d12	tifs	../tifs/Snap-65351-Image Export-49.tif	0	TRUE	652.341
DL238	rep2	d12	tifs	../tifs/Snap-65320-Image Export-18.tif	0	TRUE	507.524
DL238	rep2	d12	tifs	../tifs/Snap-65315-Image Export-13.tif	0	TRUE	624.98
DL238	rep2	d12	tifs	../tifs/Snap-65315-Image Export-13.tif	1	TRUE	653.167
DL238	rep2	d12	tifs	../tifs/Snap-65314-Image Export-12.tif	0	TRUE	619.94
DL238	rep2	d12	tifs	../tifs/Snap-65321-Image Export-19.tif	0	TRUE	609.86
DL238	rep2	d12	tifs	../tifs/Snap-65341-Image Export-39.tif	0	TRUE	548.676
DL238	rep2	d12	tifs	../tifs/Snap-65341-Image Export-39.tif	2	TRUE	608.199
DL238	rep2	d12	tifs	../tifs/Snap-65340-Image Export-38.tif	0	TRUE	709.431
DL238	rep2	d12	tifs	../tifs/Snap-65327-Image Export-25.tif	0	TRUE	575.129
DL238	rep2	d12	tifs	../tifs/Snap-65316-Image Export-14.tif	0	TRUE	631.95
DL238	rep2	d12	tifs	../tifs/Snap-65317-Image Export-15.tif	0	TRUE	590.184
DL238	rep2	d12	tifs	../tifs/Snap-65322-Image Export-20.tif	0	TRUE	655.57
DL238	rep2	d12	tifs	../tifs/Snap-65339-Image Export-37.tif	0	TRUE	623.996
DL238	rep2	d12	tifs	../tifs/Snap-65323-Image Export-21.tif	0	TRUE	703.813
DL238	rep2	d12	tifs	../tifs/Snap-65338-Image Export-36.tif	3	TRUE	710.331
DL238	rep2	d12	tifs	../tifs/Snap-65338-Image Export-36.tif	4	TRUE	479.893
DL238	rep2	d12	tifs	../tifs/Snap-65338-Image Export-36.tif	5	TRUE	456.523
DL238	rep2	d12	tifs	../tifs/Snap-65338-Image Export-36.tif	6	TRUE	641.723
DL238	rep2	d12	tifs	../tifs/Snap-65338-Image Export-36.tif	7	TRUE	558.367
DL238	rep2	d12	tifs	../tifs/Snap-65309-Image Export-07.tif	0	TRUE	672.621
DL238	rep2	d12	tifs	../tifs/Snap-65309-Image Export-07.tif	1	TRUE	293.848
DL238	rep2	d12	tifs	../tifs/Snap-65308-Image Export-06.tif	3	TRUE	673.855
DL238	rep2	d12	tifs	../tifs/Snap-65313-Image Export-11.tif	0	TRUE	654.002
DL238	rep2	d12	tifs	../tifs/Snap-65306-Image Export-04.tif	0	TRUE	452.448
DL238	rep2	d12	tifs	../tifs/Snap-65307-Image Export-05.tif	1	TRUE	543.396
DL238	rep2	d12	tifs	../tifs/Snap-65307-Image Export-05.tif	2	TRUE	713.468
DL238	rep2	d12	tifs	../tifs/Snap-65336-Image Export-34.tif	1	TRUE	621.174
DL238	rep2	d12	tifs	../tifs/Snap-65336-Image Export-34.tif	3	TRUE	660.814
DL238	rep2	d12	tifs	../tifs/Snap-65319-Image Export-17.tif	0	TRUE	593.655
DL238	rep2	d12	tifs	../tifs/Snap-65318-Image Export-16.tif	0	TRUE	634.753
DL238	rep2	d12	tifs	../tifs/Snap-65303-Image Export-01.tif	0	TRUE	508.758
DL238	rep2	d12	tifs	../tifs/Snap-65332-Image Export-30.tif	0	TRUE	598.945
DL238	rep2	d12	tifs	../tifs/Snap-65329-Image Export-27.tif	0	TRUE	613.331
DL238	rep2	d12	tifs	../tifs/Snap-65333-Image Export-31.tif	0	TRUE	662.56
DL238	rep2	d12	tifs	../tifs/Snap-65333-Image Export-31.tif	1	TRUE	677.326
DL238	rep2	d12	tifs	../tifs/Snap-65328-Image Export-26.tif	0	TRUE	666.366
DL238	rep2	d12	tifs	../tifs/Snap-65305-Image Export-03.tif	0	TRUE	587.093
DL238	rep2	d12	tifs	../tifs/Snap-65304-Image Export-02.tif	0	TRUE	488.144
DL238	rep2	d12	tifs	../tifs/Snap-65335-Image Export-33.tif	1	TRUE	650.772
DL238	rep2	d12	tifs	../tifs/Snap-65334-Image Export-32.tif	0	TRUE	655.394
DL238	rep2	d12	tifs	../tifs/Snap-65334-Image Export-32.tif	1	TRUE	754.027
DL238	rep2	d12	tifs	../tifs/Snap-65347-Image Export-45.tif	0	TRUE	563.991
DL238	rep2	d12	tifs	../tifs/Snap-65342-Image Export-40.tif	1	TRUE	406.264
DL238	rep2	d12	tifs	../tifs/Snap-65342-Image Export-40.tif	2	TRUE	644.21
DL238	rep2	d12	tifs	../tifs/Snap-65343-Image Export-41.tif	0	TRUE	622.047
DL238	rep2	d12	tifs	../tifs/Snap-65343-Image Export-41.tif	1	TRUE	688.464
DL238	rep2	d12	tifs	../tifs/Snap-65345-Image Export-43.tif	0	TRUE	466.073
DL238	rep2	d12	tifs	../tifs/Snap-65344-Image Export-42.tif	1	TRUE	691.378
DL238	rep2	d12	tifs	../tifs/Snap-65331-Image Export-29.tif	0	TRUE	579.427
DL238	rep2	d12	tifs	../tifs/Snap-65330-Image Export-28.tif	0	TRUE	608.226
DL238	rep2	d12	tifs	../tifs/Snap-65311-Image Export-09.tif	0	TRUE	656.62
DL238	rep2	d12	tifs	../tifs/Snap-65349-Image Export-47.tif	0	TRUE	469.702
DL238	rep2	d12	tifs	../tifs/Snap-65349-Image Export-47.tif	1	TRUE	616.691
DL238	rep2	d12	tifs	../tifs/Snap-65348-Image Export-46.tif	0	TRUE	606.63
EG4725	rep2	d12	tifs	../tifs/Snap-65186-Image Export-26.tif	0	TRUE	635.894
EG4725	rep2	d12	tifs	../tifs/Snap-65184-Image Export-24.tif	0	TRUE	711.25
EG4725	rep2	d12	tifs	../tifs/Snap-65169-Image Export-09.tif	0	TRUE	313.163
EG4725	rep2	d12	tifs	../tifs/Snap-65169-Image Export-09.tif	3	TRUE	731.01
EG4725	rep2	d12	tifs	../tifs/Snap-65185-Image Export-25.tif	1	TRUE	686.311
EG4725	rep2	d12	tifs	../tifs/Snap-65185-Image Export-25.tif	2	TRUE	663.505
EG4725	rep2	d12	tifs	../tifs/Snap-65182-Image Export-22.tif	0	TRUE	746.992
EG4725	rep2	d12	tifs	../tifs/Snap-65181-Image Export-21.tif	0	TRUE	672.732
EG4725	rep2	d12	tifs	../tifs/Snap-65181-Image Export-21.tif	1	TRUE	563.676
EG4725	rep2	d12	tifs	../tifs/Snap-65203-Image Export-43.tif	0	TRUE	645.194
EG4725	rep2	d12	tifs	../tifs/Snap-65201-Image Export-41.tif	0	TRUE	564.437
EG4725	rep2	d12	tifs	../tifs/Snap-65205-Image Export-45.tif	0	TRUE	681.586
EG4725	rep2	d12	tifs	../tifs/Snap-65204-Image Export-44.tif	0	TRUE	726.555
EG4725	rep2	d12	tifs	../tifs/Snap-65179-Image Export-19.tif	0	TRUE	554.98
EG4725	rep2	d12	tifs	../tifs/Snap-65197-Image Export-37.tif	0	TRUE	715.083
EG4725	rep2	d12	tifs	../tifs/Snap-65191-Image Export-31.tif	0	TRUE	740.737
EG4725	rep2	d12	tifs	../tifs/Snap-65192-Image Export-32.tif	0	TRUE	551.777
EG4725	rep2	d12	tifs	../tifs/Snap-65166-Image Export-06.tif	0	TRUE	700.678
EG4725	rep2	d12	tifs	../tifs/Snap-65189-Image Export-29.tif	0	TRUE	545.438
EG4725	rep2	d12	tifs	../tifs/Snap-65189-Image Export-29.tif	1	TRUE	488.701
EG4725	rep2	d12	tifs	../tifs/Snap-65189-Image Export-29.tif	2	TRUE	763.012
EG4725	rep2	d12	tifs	../tifs/Snap-65188-Image Export-28.tif	0	TRUE	649.761
EG4725	rep2	d12	tifs	../tifs/Snap-65188-Image Export-28.tif	3	TRUE	736.792
EG4725	rep2	d12	tifs	../tifs/Snap-65188-Image Export-28.tif	4	TRUE	708.132
EG4725	rep2	d12	tifs	../tifs/Snap-65164-Image Export-04.tif	0	TRUE	702.711
EG4725	rep2	d12	tifs	../tifs/Snap-65162-Image Export-02.tif	0	TRUE	461.525
EG4725	rep2	d12	tifs	../tifs/Snap-65162-Image Export-02.tif	3	TRUE	429.189
EG4725	rep2	d12	tifs	../tifs/Snap-65162-Image Export-02.tif	4	TRUE	737.108
EG4725	rep2	d12	tifs	../tifs/Snap-65175-Image Export-15.tif	0	TRUE	532.036
EG4725	rep2	d12	tifs	../tifs/Snap-65175-Image Export-15.tif	1	TRUE	530.69
EG4725	rep2	d12	tifs	../tifs/Snap-65174-Image Export-14.tif	0	TRUE	700.27
EG4725	rep2	d12	tifs	../tifs/Snap-65171-Image Export-11.tif	0	TRUE	565.402
EG4725	rep2	d12	tifs	../tifs/Snap-65171-Image Export-11.tif	1	TRUE	526.458
EG4725	rep2	d12	tifs	../tifs/Snap-65172-Image Export-12.tif	0	TRUE	461.655
MY2147	rep2	d12	tifs	../tifs/Snap-65211-Image Export-06.tif	0	TRUE	362.772
NIC526	rep2	d12	tifs	../tifs/Snap-65261-Image Export-01.tif	0	TRUE	677.595
NIC526	rep2	d12	tifs	../tifs/Snap-65263-Image Export-03.tif	1	TRUE	680.909
NIC526	rep2	d12	tifs	../tifs/Snap-65288-Image Export-28.tif	1	TRUE	677.911
NIC526	rep2	d12	tifs	../tifs/Snap-65264-Image Export-04.tif	0	TRUE	601.971
NIC526	rep2	d12	tifs	../tifs/Snap-65264-Image Export-04.tif	1	TRUE	651.357
NIC526	rep2	d12	tifs	../tifs/Snap-65267-Image Export-07.tif	1	TRUE	660.646
NIC526	rep2	d12	tifs	../tifs/Snap-65270-Image Export-10.tif	1	TRUE	717.459
NIC526	rep2	d12	tifs	../tifs/Snap-65270-Image Export-10.tif	2	TRUE	680.482
NIC526	rep2	d12	tifs	../tifs/Snap-65276-Image Export-16.tif	0	TRUE	665.697
NIC526	rep2	d12	tifs	../tifs/Snap-65277-Image Export-17.tif	0	TRUE	611.113
NIC526	rep2	d12	tifs	../tifs/Snap-65298-Image Export-38.tif	0	TRUE	489.351
NIC526	rep2	d12	tifs	../tifs/Snap-65274-Image Export-14.tif	0	TRUE	442.229
NIC526	rep2	d12	tifs	../tifs/Snap-65299-Image Export-39.tif	0	TRUE	444.244
NIC526	rep2	d12	tifs	../tifs/Snap-65282-Image Export-22.tif	0	TRUE	340.589
NIC526	rep2	d12	tifs	../tifs/Snap-65282-Image Export-22.tif	1	TRUE	629.889
NIC526	rep2	d12	tifs	../tifs/Snap-65285-Image Export-25.tif	0	TRUE	578.842
NIC526	rep2	d12	tifs	../tifs/Snap-65287-Image Export-27.tif	0	TRUE	628.478
NIC526	rep2	d12	tifs	../tifs/Snap-65293-Image Export-33.tif	0	TRUE	670.133
NIC526	rep2	d12	tifs	../tifs/Snap-65292-Image Export-32.tif	0	TRUE	665.539
NIC526	rep2	d12	tifs	../tifs/Snap-65291-Image Export-31.tif	2	TRUE	488.071
NIC526	rep2	d12	tifs	../tifs/Snap-65291-Image Export-31.tif	4	TRUE	492.107
NIC526	rep2	d12	tifs	../tifs/Snap-65290-Image Export-30.tif	0	TRUE	456.188
NIC526	rep2	d12	tifs	../tifs/Snap-65296-Image Export-36.tif	0	TRUE	721.061
NIC526	rep2	d12	tifs	../tifs/Snap-65300-Image Export-40.tif	0	TRUE	661.575
NIC526	rep2	d12	tifs	../tifs/Snap-65300-Image Export-40.tif	1	TRUE	629.017
NIC526	rep2	d12	tifs	../tifs/Snap-65279-Image Export-19.tif	1	TRUE	605.665
NIC526	rep2	d12	tifs	../tifs/Snap-65279-Image Export-19.tif	3	TRUE	653.194
NIC526	rep2	d12	tifs	../tifs/Snap-65295-Image Export-35.tif	0	TRUE	393.966
NIC526	rep2	d12	tifs	../tifs/Snap-65301-Image Export-41.tif	0	TRUE	667.108
NIC526	rep2	d12	tifs	../tifs/Snap-65294-Image Export-34.tif	0	TRUE	651.737
DL238	rep4	d12	tifs	../tifs/Snap-65723-Image Export-50.tif	1	TRUE	710.089
DL238	rep4	d12	tifs	../tifs/Snap-65687-Image Export-14.tif	0	TRUE	663.209
DL238	rep4	d12	tifs	../tifs/Snap-65702-Image Export-29.tif	0	TRUE	656.99
DL238	rep4	d12	tifs	../tifs/Snap-65676-Image Export-03.tif	0	TRUE	651.218
DL238	rep4	d12	tifs	../tifs/Snap-65680-Image Export-07.tif	0	TRUE	646.809
DL238	rep4	d12	tifs	../tifs/Snap-65675-Image Export-02.tif	0	TRUE	498.474
DL238	rep4	d12	tifs	../tifs/Snap-65725-Image Export-52.tif	2	TRUE	621.174
DL238	rep4	d12	tifs	../tifs/Snap-65684-Image Export-11.tif	0	TRUE	482.538
DL238	rep4	d12	tifs	../tifs/Snap-65684-Image Export-11.tif	1	TRUE	647.366
DL238	rep4	d12	tifs	../tifs/Snap-65677-Image Export-04.tif	2	TRUE	614.204
DL238	rep4	d12	tifs	../tifs/Snap-65686-Image Export-13.tif	0	TRUE	569.616
DL238	rep4	d12	tifs	../tifs/Snap-65679-Image Export-06.tif	0	TRUE	640.173
DL238	rep4	d12	tifs	../tifs/Snap-65679-Image Export-06.tif	1	TRUE	647.393
DL238	rep4	d12	tifs	../tifs/Snap-65729-Image Export-56.tif	0	TRUE	696.752
DL238	rep4	d12	tifs	../tifs/Snap-65728-Image Export-55.tif	1	TRUE	682.579
DL238	rep4	d12	tifs	../tifs/Snap-65689-Image Export-16.tif	0	TRUE	684.269
DL238	rep4	d12	tifs	../tifs/Snap-65711-Image Export-38.tif	0	TRUE	542.347
DL238	rep4	d12	tifs	../tifs/Snap-65690-Image Export-17.tif	0	TRUE	413.011
DL238	rep4	d12	tifs	../tifs/Snap-65694-Image Export-21.tif	0	TRUE	582.341
DL238	rep4	d12	tifs	../tifs/Snap-65692-Image Export-19.tif	0	TRUE	730.657
DL238	rep4	d12	tifs	../tifs/Snap-65696-Image Export-23.tif	0	TRUE	550.97
DL238	rep4	d12	tifs	../tifs/Snap-65708-Image Export-35.tif	0	TRUE	712.966
DL238	rep4	d12	tifs	../tifs/Snap-65691-Image Export-18.tif	0	TRUE	678.672
DL238	rep4	d12	tifs	../tifs/Snap-65695-Image Export-22.tif	0	TRUE	527.961
DL238	rep4	d12	tifs	../tifs/Snap-65710-Image Export-37.tif	0	TRUE	563.453
DL238	rep4	d12	tifs	../tifs/Snap-65710-Image Export-37.tif	1	TRUE	555.118
DL238	rep4	d12	tifs	../tifs/Snap-65719-Image Export-46.tif	0	TRUE	373.306
DL238	rep4	d12	tifs	../tifs/Snap-65719-Image Export-46.tif	1	TRUE	656.555
DL238	rep4	d12	tifs	../tifs/Snap-65697-Image Export-24.tif	0	TRUE	814.235
DL238	rep4	d12	tifs	../tifs/Snap-65697-Image Export-24.tif	1	TRUE	642.949
DL238	rep4	d12	tifs	../tifs/Snap-65718-Image Export-45.tif	0	TRUE	687.945
DL238	rep4	d12	tifs	../tifs/Snap-65718-Image Export-45.tif	1	TRUE	653.64
DL238	rep4	d12	tifs	../tifs/Snap-65693-Image Export-20.tif	0	TRUE	420.223
DL238	rep4	d12	tifs	../tifs/Snap-65693-Image Export-20.tif	1	TRUE	673.178
DL238	rep4	d12	tifs	../tifs/Snap-65713-Image Export-40.tif	0	TRUE	674.839
DL238	rep4	d12	tifs	../tifs/Snap-65704-Image Export-31.tif	0	TRUE	464.95
DL238	rep4	d12	tifs	../tifs/Snap-65698-Image Export-25.tif	0	TRUE	418.97
DL238	rep4	d12	tifs	../tifs/Snap-65706-Image Export-33.tif	0	TRUE	686.042
DL238	rep4	d12	tifs	../tifs/Snap-65699-Image Export-26.tif	0	TRUE	601.683
DL238	rep4	d12	tifs	../tifs/Snap-65717-Image Export-44.tif	0	TRUE	659.757
DL238	rep4	d12	tifs	../tifs/Snap-65705-Image Export-32.tif	0	TRUE	485.787
DL238	rep4	d12	tifs	../tifs/Snap-65721-Image Export-48.tif	0	TRUE	660.591
DL238	rep4	d12	tifs	../tifs/Snap-65715-Image Export-42.tif	1	TRUE	666.189
DL238	rep4	d12	tifs	../tifs/Snap-65682-Image Export-09.tif	0	TRUE	678.495
DL238	rep4	d12	tifs	../tifs/Snap-65703-Image Export-30.tif	1	TRUE	689.848
DL238	rep4	d12	tifs	../tifs/Snap-65703-Image Export-30.tif	2	TRUE	492.442
DL238	rep4	d12	tifs	../tifs/Snap-65714-Image Export-41.tif	0	TRUE	673.743
DL238	rep4	d12	tifs	../tifs/Snap-65714-Image Export-41.tif	1	TRUE	643.599
EG4725	rep4	d12	tifs	../tifs/Snap-65766-Image Export-37.tif	0	TRUE	811.498
EG4725	rep4	d12	tifs	../tifs/Snap-65764-Image Export-35.tif	0	TRUE	612.728
EG4725	rep4	d12	tifs	../tifs/Snap-65764-Image Export-35.tif	1	TRUE	757.583
EG4725	rep4	d12	tifs	../tifs/Snap-65773-Image Export-44.tif	0	TRUE	706.563
EG4725	rep4	d12	tifs	../tifs/Snap-65773-Image Export-44.tif	1	TRUE	741.775
EG4725	rep4	d12	tifs	../tifs/Snap-65765-Image Export-36.tif	0	TRUE	527.042
EG4725	rep4	d12	tifs	../tifs/Snap-65765-Image Export-36.tif	1	TRUE	597.869
EG4725	rep4	d12	tifs	../tifs/Snap-65737-Image Export-08.tif	1	TRUE	685.772
EG4725	rep4	d12	tifs	../tifs/Snap-65760-Image Export-31.tif	0	TRUE	517.316
EG4725	rep4	d12	tifs	../tifs/Snap-65760-Image Export-31.tif	1	TRUE	709.254
EG4725	rep4	d12	tifs	../tifs/Snap-65770-Image Export-41.tif	0	TRUE	671.229
EG4725	rep4	d12	tifs	../tifs/Snap-65770-Image Export-41.tif	2	TRUE	665.789
EG4725	rep4	d12	tifs	../tifs/Snap-65772-Image Export-43.tif	0	TRUE	878.054
EG4725	rep4	d12	tifs	../tifs/Snap-65769-Image Export-40.tif	0	TRUE	760.663
EG4725	rep4	d12	tifs	../tifs/Snap-65757-Image Export-28.tif	1	TRUE	675.062
EG4725	rep4	d12	tifs	../tifs/Snap-65774-Image Export-45.tif	0	TRUE	661.929
EG4725	rep4	d12	tifs	../tifs/Snap-65763-Image Export-34.tif	0	TRUE	746.761
EG4725	rep4	d12	tifs	../tifs/Snap-65763-Image Export-34.tif	1	TRUE	634.057
EG4725	rep4	d12	tifs	../tifs/Snap-65771-Image Export-42.tif	0	TRUE	744.97
EG4725	rep4	d12	tifs	../tifs/Snap-65758-Image Export-29.tif	0	TRUE	730.833
EG4725	rep4	d12	tifs	../tifs/Snap-65741-Image Export-12.tif	0	TRUE	681.651
EG4725	rep4	d12	tifs	../tifs/Snap-65746-Image Export-17.tif	0	TRUE	750.24
EG4725	rep4	d12	tifs	../tifs/Snap-65744-Image Export-15.tif	0	TRUE	796.536
EG4725	rep4	d12	tifs	../tifs/Snap-65745-Image Export-16.tif	0	TRUE	744.904
EG4725	rep4	d12	tifs	../tifs/Snap-65738-Image Export-09.tif	0	TRUE	705.802
EG4725	rep4	d12	tifs	../tifs/Snap-65739-Image Export-10.tif	1	TRUE	610.286
EG4725	rep4	d12	tifs	../tifs/Snap-65768-Image Export-39.tif	0	TRUE	664.351
EG4725	rep4	d12	tifs	../tifs/Snap-65768-Image Export-39.tif	1	TRUE	805.874
EG4725	rep4	d12	tifs	../tifs/Snap-65768-Image Export-39.tif	2	TRUE	692.446
EG4725	rep4	d12	tifs	../tifs/Snap-65759-Image Export-30.tif	0	TRUE	773.657
EG4725	rep4	d12	tifs	../tifs/Snap-65756-Image Export-27.tif	2	TRUE	712.949
EG4725	rep4	d12	tifs	../tifs/Snap-65733-Image Export-04.tif	0	TRUE	711.657
EG4725	rep4	d12	tifs	../tifs/Snap-65755-Image Export-26.tif	1	TRUE	656.332
EG4725	rep4	d12	tifs	../tifs/Snap-65749-Image Export-20.tif	0	TRUE	832.047
EG4725	rep4	d12	tifs	../tifs/Snap-65732-Image Export-03.tif	3	TRUE	697.291
EG4725	rep4	d12	tifs	../tifs/Snap-65748-Image Export-19.tif	0	TRUE	811.702
EG4725	rep4	d12	tifs	../tifs/Snap-65748-Image Export-19.tif	1	TRUE	199.828
EG4725	rep4	d12	tifs	../tifs/Snap-65736-Image Export-07.tif	0	TRUE	629.908
EG4725	rep4	d12	tifs	../tifs/Snap-65731-Image Export-02.tif	6	TRUE	622.362
EG4725	rep4	d12	tifs	../tifs/Snap-65731-Image Export-02.tif	7	TRUE	679.656
MY2147	rep4	d12	tifs	../tifs/Snap-65658-Image Export-08.tif	2	TRUE	290.6
MY2147	rep4	d12	tifs	../tifs/Snap-65661-Image Export-11.tif	0	TRUE	236.99
MY2147	rep4	d12	tifs	../tifs/Snap-65665-Image Export-15.tif	0	TRUE	304.29
MY2147	rep4	d12	tifs	../tifs/Snap-65654-Image Export-04.tif	0	TRUE	316.95
MY2147	rep4	d12	tifs	../tifs/Snap-65655-Image Export-05.tif	2	TRUE	187.391
MY2147	rep4	d12	tifs	../tifs/Snap-65669-Image Export-19.tif	0	TRUE	207.29
MY2147	rep4	d12	tifs	../tifs/Snap-65673-Image Export-23.tif	1	TRUE	192.254
MY2147	rep4	d12	tifs	../tifs/Snap-65673-Image Export-23.tif	2	TRUE	303.371
NIC526	rep4	d12	tifs	../tifs/Snap-65644-Image Export-24.tif	0	TRUE	413.011
NIC526	rep4	d12	tifs	../tifs/Snap-65645-Image Export-25.tif	0	TRUE	624.143
NIC526	rep4	d12	tifs	../tifs/Snap-65640-Image Export-20.tif	0	TRUE	630.539
NIC526	rep4	d12	tifs	../tifs/Snap-65642-Image Export-22.tif	0	TRUE	329.321
NIC526	rep4	d12	tifs	../tifs/Snap-65643-Image Export-23.tif	0	TRUE	550.402
NIC526	rep4	d12	tifs	../tifs/Snap-65623-Image Export-03.tif	0	TRUE	523.97
NIC526	rep4	d12	tifs	../tifs/Snap-65622-Image Export-02.tif	0	TRUE	449.107
NIC526	rep4	d12	tifs	../tifs/Snap-65621-Image Export-01.tif	0	TRUE	326.092
NIC526	rep4	d12	tifs	../tifs/Snap-65626-Image Export-06.tif	0	TRUE	591.168
NIC526	rep4	d12	tifs	../tifs/Snap-65625-Image Export-05.tif	0	TRUE	500.934
NIC526	rep4	d12	tifs	../tifs/Snap-65624-Image Export-04.tif	0	TRUE	559.509
NIC526	rep4	d12	tifs	../tifs/Snap-65631-Image Export-11.tif	1	TRUE	476.737
NIC526	rep4	d12	tifs	../tifs/Snap-65631-Image Export-11.tif	2	TRUE	257.437
NIC526	rep4	d12	tifs	../tifs/Snap-65630-Image Export-10.tif	2	TRUE	370.438
NIC526	rep4	d12	tifs	../tifs/Snap-65633-Image Export-13.tif	0	TRUE	316.346
NIC526	rep4	d12	tifs	../tifs/Snap-65635-Image Export-15.tif	0	TRUE	380.722
NIC526	rep4	d12	tifs	../tifs/Snap-65649-Image Export-29.tif	0	TRUE	497.128

## Sheet: Fig_2G
day	replicate	worm_number	strain	brood
d1	rep1	1	DL238	0
d1	rep1	2	DL238	83
d1	rep1	3	DL238	140
d1	rep1	4	DL238	116
d1	rep1	5	DL238	119
d1	rep1	6	DL238	118
d1	rep1	7	DL238	52
d1	rep1	8	DL238	73
d1	rep1	9	DL238	115
d1	rep1	10	DL238	97
d1	rep1	11	DL238	82
d1	rep1	12	DL238	109
d1	rep1	1	EG4725	80
d1	rep1	2	EG4725	82
d1	rep1	3	EG4725	108
d1	rep1	4	EG4725	83
d1	rep1	5	EG4725	0
d1	rep1	6	EG4725	0
d1	rep1	7	EG4725	0
d1	rep1	8	EG4725	107
d1	rep1	9	EG4725	0
d1	rep1	10	EG4725	8
d1	rep1	11	EG4725	110
d1	rep1	12	EG4725	14
d1	rep1	1	MY2147	96
d1	rep1	2	MY2147	6
d1	rep1	3	MY2147	98
d1	rep1	4	MY2147	100
d1	rep1	5	MY2147	98
d1	rep1	6	MY2147	108
d1	rep1	7	MY2147	106
d1	rep1	8	MY2147	100
d1	rep1	9	MY2147	83
d1	rep1	10	MY2147	81
d1	rep1	11	MY2147	76
d1	rep1	12	MY2147	73
d1	rep1	1	NIC526	46
d1	rep1	2	NIC526	44
d1	rep1	3	NIC526	48
d1	rep1	4	NIC526	35
d1	rep1	5	NIC526	58
d1	rep1	6	NIC526	36
d1	rep1	7	NIC526	39
d1	rep1	8	NIC526	0
d1	rep1	9	NIC526	9
d1	rep1	10	NIC526	0
d1	rep1	11	NIC526	63
d1	rep1	12	NIC526	60
d1	rep1	1	QX1430	86
d1	rep1	2	QX1430	85
d1	rep1	3	QX1430	88
d1	rep1	4	QX1430	83
d1	rep1	5	QX1430	82
d1	rep1	6	QX1430	81
d1	rep1	7	QX1430	79
d1	rep1	8	QX1430	70
d1	rep1	9	QX1430	73
d1	rep1	10	QX1430	63
d1	rep1	11	QX1430	83
d1	rep1	12	QX1430	72
d8	rep1	1	DL238	113
d8	rep1	2	DL238	100
d8	rep1	3	DL238	106
d8	rep1	4	DL238	21
d8	rep1	5	DL238	115
d8	rep1	6	DL238	76
d8	rep1	7	DL238	84
d8	rep1	8	DL238	124
d8	rep1	9	DL238	56
d8	rep1	10	DL238	95
d8	rep1	11	DL238	19
d8	rep1	12	DL238	91
d8	rep1	1	EG4725	0
d8	rep1	2	EG4725	57
d8	rep1	3	EG4725	75
d8	rep1	4	EG4725	0
d8	rep1	5	EG4725	103
d8	rep1	6	EG4725	67
d8	rep1	7	EG4725	0
d8	rep1	8	EG4725	0
d8	rep1	9	EG4725	0
d8	rep1	10	EG4725	116
d8	rep1	11	EG4725	113
d8	rep1	12	EG4725	0
d8	rep1	1	MY2147	12
d8	rep1	2	MY2147	0
d8	rep1	3	MY2147	33
d8	rep1	4	MY2147	0
d8	rep1	5	MY2147	83
d8	rep1	6	MY2147	0
d8	rep1	7	MY2147	43
d8	rep1	8	MY2147	52
d8	rep1	9	MY2147	13
d8	rep1	10	MY2147	60
d8	rep1	11	MY2147	93
d8	rep1	12	MY2147	44
d8	rep1	1	NIC526	68
d8	rep1	2	NIC526	0
d8	rep1	1	QX1430	0
d8	rep1	3	QX1430	0
d8	rep1	4	QX1430	0
d8	rep1	5	QX1430	12
d8	rep1	6	QX1430	0
d8	rep1	7	QX1430	0
d8	rep1	8	QX1430	0
d8	rep1	9	QX1430	0
d8	rep1	10	QX1430	105
d8	rep1	11	QX1430	0
d8	rep1	12	QX1430	0
d1	rep2	1	DL238	135
d1	rep2	2	DL238	129
d1	rep2	3	DL238	151
d1	rep2	4	DL238	135
d1	rep2	5	DL238	154
d1	rep2	6	DL238	133
d1	rep2	7	DL238	112
d1	rep2	8	DL238	126
d1	rep2	9	DL238	144
d1	rep2	10	DL238	124
d1	rep2	11	DL238	131
d1	rep2	12	DL238	131
d1	rep2	1	EG4725	198	?
d1	rep2	2	EG4725	168	?
d1	rep2	3	EG4725	161
d1	rep2	4	EG4725	204	?
d1	rep2	1	MY2147	145
d1	rep2	2	MY2147	170
d1	rep2	3	MY2147	153
d1	rep2	4	MY2147	51
d1	rep2	5	MY2147	161
d1	rep2	1	NIC526	159
d1	rep2	2	NIC526	190	?
d1	rep2	3	NIC526	157
d1	rep2	4	NIC526	163
d1	rep2	1	QX1430	123
d1	rep2	2	QX1430	159
d1	rep2	3	QX1430	29
d1	rep2	4	QX1430	134
d1	rep2	5	QX1430	142
d1	rep2	6	QX1430	171	?
d1	rep2	7	QX1430	151
d1	rep2	8	QX1430	153
d1	rep2	9	QX1430	152
d1	rep2	10	QX1430	129
d1	rep2	11	QX1430	140
d1	rep2	12	QX1430	127
d8	rep2	1	DL238	55
d8	rep2	2	DL238	68
d8	rep2	3	DL238	0
d8	rep2	4	DL238	75
d8	rep2	5	DL238	0
d8	rep2	6	DL238	61
d8	rep2	7	DL238	50
d8	rep2	8	DL238	19
d8	rep2	9	DL238	9
d8	rep2	10	DL238	58
d8	rep2	11	DL238	69
d8	rep2	12	DL238	70
d8	rep2	1	EG4725	68
d8	rep2	2	EG4725	63
d8	rep2	3	EG4725	85
d8	rep2	4	EG4725	87
d8	rep2	5	EG4725	0
d8	rep2	6	EG4725	0
d8	rep2	7	EG4725	101
d8	rep2	8	EG4725	68
d8	rep2	9	EG4725	89
d8	rep2	10	EG4725	90
d8	rep2	11	EG4725	0
d8	rep2	12	EG4725	49
d8	rep2	1	MY2147	0
d8	rep2	2	MY2147	0
d8	rep2	3	MY2147	0
d8	rep2	4	MY2147	0
d8	rep2	5	MY2147	0
d8	rep2	6	MY2147	0
d8	rep2	7	MY2147	53
d8	rep2	8	MY2147	0
d8	rep2	9	MY2147	0
d8	rep2	10	MY2147	0	0-1 (embryos on plate)
d8	rep2	11	MY2147	0
d8	rep2	12	MY2147	0
d8	rep2	2	NIC526	0
d8	rep2	3	NIC526	0
d8	rep2	4	NIC526	0
d8	rep2	6	NIC526	0
d8	rep2	7	NIC526	0
d8	rep2	8	NIC526	21
d8	rep2	9	NIC526	7
d8	rep2	10	NIC526	0
d8	rep2	11	NIC526	0
d8	rep2	12	NIC526	5
d8	rep2	1	QX1430	50
d8	rep2	2	QX1430	59
d8	rep2	3	QX1430	3
d8	rep2	4	QX1430	0
d8	rep2	5	QX1430	0
d8	rep2	6	QX1430	20
d8	rep2	7	QX1430	0
d8	rep2	8	QX1430	6
d8	rep2	9	QX1430	30
d8	rep2	10	QX1430	36
d8	rep2	11	QX1430	0
d8	rep2	12	QX1430	0
d1	rep3	1	DL238	80
d1	rep3	2	DL238	58
d1	rep3	3	DL238	193
d1	rep3	4	DL238	167
d1	rep3	5	DL238	102
d1	rep3	6	DL238	172
d1	rep3	7	DL238	172
d1	rep3	8	DL238	135
d1	rep3	9	DL238	109
d1	rep3	10	DL238	126
d1	rep3	11	DL238	117
d1	rep3	12	DL238	150
d1	rep3	1	EG4725	234
d1	rep3	2	EG4725	221
d1	rep3	3	EG4725	220
d1	rep3	4	EG4725	159
d1	rep3	5	EG4725	168
d1	rep3	6	EG4725	100
d1	rep3	7	EG4725	219
d1	rep3	8	EG4725	17
d1	rep3	9	EG4725	187
d1	rep3	10	EG4725	168
d1	rep3	11	EG4725	191
d1	rep3	12	EG4725	197
d1	rep3	1	MY2147	216
d1	rep3	2	MY2147	0
d1	rep3	3	MY2147	171
d1	rep3	4	MY2147	86
d1	rep3	5	MY2147	59
d1	rep3	6	MY2147	156
d1	rep3	7	MY2147	195
d1	rep3	8	MY2147	189
d1	rep3	9	MY2147	205
d1	rep3	10	MY2147	215
d1	rep3	11	MY2147	215
d1	rep3	12	MY2147	188
d1	rep3	1	NIC526	214
d1	rep3	2	NIC526	222
d1	rep3	3	NIC526	236
d1	rep3	4	NIC526	231
d1	rep3	5	NIC526	160
d1	rep3	6	NIC526	163
d1	rep3	7	NIC526	189
d1	rep3	8	NIC526	238
d1	rep3	9	NIC526	231
d1	rep3	10	NIC526	217
d1	rep3	11	NIC526	214
d1	rep3	12	NIC526	16
d1	rep3	1	QX1430	203
d1	rep3	2	QX1430	198
d1	rep3	3	QX1430	228
d1	rep3	4	QX1430	214
d1	rep3	5	QX1430	180
d1	rep3	6	QX1430	171
d1	rep3	7	QX1430	207
d1	rep3	8	QX1430	175
d1	rep3	9	QX1430	216
d1	rep3	10	QX1430	197
d1	rep3	11	QX1430	212
d1	rep3	12	QX1430	202
d8	rep3	1	DL238	222
d8	rep3	2	DL238	191
d8	rep3	3	DL238	11
d8	rep3	4	DL238	162
d8	rep3	5	DL238	145
d8	rep3	6	DL238	150
d8	rep3	7	DL238	154
d8	rep3	8	DL238	97
d8	rep3	9	DL238	204
d8	rep3	10	DL238	149
d8	rep3	11	DL238	0
d8	rep3	12	DL238	157
d8	rep3	1	EG4725	210
d8	rep3	2	EG4725	211
d8	rep3	3	EG4725	58
d8	rep3	4	EG4725	187
d8	rep3	5	EG4725	232
d8	rep3	6	EG4725	223
d8	rep3	7	EG4725	31
d8	rep3	8	EG4725	244
d8	rep3	9	EG4725	215
d8	rep3	10	EG4725	163
d8	rep3	11	EG4725	36
d8	rep3	12	EG4725	39
d8	rep3	1	MY2147	0
d8	rep3	2	MY2147	28
d8	rep3	3	MY2147	0
d8	rep3	4	MY2147	54
d8	rep3	5	MY2147	0
d8	rep3	6	MY2147	120
d8	rep3	7	MY2147	0
d8	rep3	8	MY2147	0
d8	rep3	9	MY2147	15
d8	rep3	10	MY2147	0
d8	rep3	11	MY2147	152
d8	rep3	12	MY2147	105
d8	rep3	1	NIC526	0
d8	rep3	2	NIC526	0
d8	rep3	3	NIC526	179
d8	rep3	4	NIC526	32
d8	rep3	5	NIC526	0
d8	rep3	6	NIC526	0
d8	rep3	7	NIC526	203
d8	rep3	8	NIC526	0
d8	rep3	9	NIC526	118
d8	rep3	10	NIC526	131
d8	rep3	11	NIC526	215
d8	rep3	12	NIC526	195
d8	rep3	1	QX1430	72
d8	rep3	2	QX1430	0
d8	rep3	3	QX1430	130
d8	rep3	4	QX1430	0
d8	rep3	5	QX1430	51
d8	rep3	6	QX1430	38
d8	rep3	7	QX1430	140
d8	rep3	8	QX1430	5
d8	rep3	9	QX1430	33
d8	rep3	10	QX1430	165
d8	rep3	11	QX1430	59
d8	rep3	12	QX1430	0
