# Supplementary material for: Using population selection and sequencing to characterize natural variation of starvation resistance in Caenorhabditis elegans
Source: eLife. 2022 Jun 21;11:e80204. doi: 10.7554/eLife.80204 (PMC9262388; doi:10.7554/eLife.80204)
Supplement: Figure 3—figure supplement 1—source data 1. [file elife-80204-fig3-figsupp1-data1.xlsx]

## Sheet: README
Source data is available on each sheet for manual phenotypic assays for survival, recovery, and early fecundity. These correspond to the figure panels below:
Fig3-supp1C
Fig3-supp1D

## Sheet: Fig3-supp1C
strain	strain_combine	replicate	day	imageFile	id	pass	length
DL238	DL238	1	d1	../DL238_d1_r1/Snap-83766-Image Export-14.tif	0	TRUE	866.439
DL238	DL238	1	d1	../DL238_d1_r1/Snap-83767-Image Export-15.tif	1	TRUE	860.43
DL238	DL238	1	d1	../DL238_d1_r1/Snap-83767-Image Export-15.tif	2	TRUE	916.226
DL238	DL238	1	d1	../DL238_d1_r1/Snap-83767-Image Export-15.tif	3	TRUE	837.902
DL238	DL238	1	d1	../DL238_d1_r1/Snap-83767-Image Export-15.tif	4	TRUE	812.581
DL238	DL238	1	d1	../DL238_d1_r1/Snap-83763-Image Export-11.tif	1	TRUE	829.169
DL238	DL238	1	d1	../DL238_d1_r1/Snap-83763-Image Export-11.tif	2	TRUE	878.699
DL238	DL238	1	d1	../DL238_d1_r1/Snap-83765-Image Export-13.tif	0	TRUE	826.301
DL238	DL238	1	d1	../DL238_d1_r1/Snap-83765-Image Export-13.tif	2	TRUE	724.283
DL238	DL238	1	d1	../DL238_d1_r1/Snap-83764-Image Export-12.tif	0	TRUE	900.66
DL238	DL238	1	d1	../DL238_d1_r1/Snap-83764-Image Export-12.tif	1	TRUE	878.699
DL238	DL238	1	d1	../DL238_d1_r1/Snap-83764-Image Export-12.tif	2	TRUE	874.241
DL238	DL238	1	d1	../DL238_d1_r1/Snap-83764-Image Export-12.tif	3	TRUE	864.32
DL238	DL238	1	d1	../DL238_d1_r1/Snap-83780-Image Export-28.tif	0	TRUE	843.547
DL238	DL238	1	d1	../DL238_d1_r1/Snap-83780-Image Export-28.tif	1	TRUE	840.46
DL238	DL238	1	d1	../DL238_d1_r1/Snap-83769-Image Export-17.tif	1	TRUE	792.557
DL238	DL238	1	d1	../DL238_d1_r1/Snap-83768-Image Export-16.tif	0	TRUE	822.154
DL238	DL238	1	d1	../DL238_d1_r1/Snap-83787-Image Export-35.tif	0	TRUE	821.185
DL238	DL238	1	d1	../DL238_d1_r1/Snap-83786-Image Export-34.tif	0	TRUE	873.364
DL238	DL238	1	d1	../DL238_d1_r1/Snap-83786-Image Export-34.tif	1	TRUE	833.793
DL238	DL238	1	d1	../DL238_d1_r1/Snap-83786-Image Export-34.tif	2	TRUE	790.62
DL238	DL238	1	d1	../DL238_d1_r1/Snap-83774-Image Export-22.tif	0	TRUE	851.622
DL238	DL238	1	d1	../DL238_d1_r1/Snap-83783-Image Export-31.tif	0	TRUE	817.568
DL238	DL238	1	d1	../DL238_d1_r1/Snap-83782-Image Export-30.tif	1	TRUE	810.772
DL238	DL238	1	d1	../DL238_d1_r1/Snap-83782-Image Export-30.tif	6	TRUE	858.675
DL238	DL238	1	d1	../DL238_d1_r1/Snap-83771-Image Export-19.tif	0	TRUE	809.145
DL238	DL238	1	d1	../DL238_d1_r1/Snap-83776-Image Export-24.tif	0	TRUE	753.569
DL238	DL238	1	d1	../DL238_d1_r1/Snap-83784-Image Export-32.tif	0	TRUE	900.312
DL238	DL238	1	d1	../DL238_d1_r1/Snap-83784-Image Export-32.tif	1	TRUE	832.385
DL238	DL238	1	d1	../DL238_d1_r1/Snap-83758-Image Export-06.tif	0	TRUE	866.878
DL238	DL238	1	d1	../DL238_d1_r1/Snap-83759-Image Export-07.tif	0	TRUE	894.336
DL238	DL238	1	d1	../DL238_d1_r1/Snap-83759-Image Export-07.tif	7	TRUE	804.067
DL238	DL238	1	d1	../DL238_d1_r1/Snap-83759-Image Export-07.tif	10	TRUE	877.072
DL238	DL238	1	d1	../DL238_d1_r1/Snap-83759-Image Export-07.tif	11	TRUE	855.716
DL238	DL238	1	d1	../DL238_d1_r1/Snap-83757-Image Export-05.tif	0	TRUE	803.757
DL238	DL238	1	d1	../DL238_d1_r1/Snap-83756-Image Export-04.tif	0	TRUE	902.96
DL238	DL238	1	d1	../DL238_d1_r1/Snap-83753-Image Export-01.tif	5	TRUE	888.181
DL238	DL238	1	d1	../DL238_d1_r1/Snap-83753-Image Export-01.tif	8	TRUE	823.524
DL238	DL238	1	d1	../DL238_d1_r1/Snap-83778-Image Export-26.tif	0	TRUE	894.757
DL238	DL238	1	d1	../DL238_d1_r1/Snap-83779-Image Export-27.tif	1	TRUE	909.045
DL238	DL238	1	d1	../DL238_d1_r1/Snap-83779-Image Export-27.tif	2	TRUE	867.098
DL238	DL238	1	d1	../DL238_d1_r1/Snap-83761-Image Export-09.tif	0	TRUE	853.03
DL238	DL238	1	d1	../DL238_d1_r1/Snap-83755-Image Export-03.tif	1	TRUE	839.181
DL238	DL238	1	d1	../DL238_d1_r1/Snap-83760-Image Export-08.tif	2	TRUE	835.601
DL238	DL238	1	d1	../DL238_d1_r1/Snap-83760-Image Export-08.tif	7	TRUE	858.985
DL238	DL238	1	d1	../DL238_d1_r1/Snap-83760-Image Export-08.tif	8	TRUE	839.62
DL238	DL238	1	d1	../DL238_d1_r1/Snap-83788-Image Export-36.tif	0	TRUE	738.699
DL238	DL238	2	d1	../DL238_d1_r2/Snap-84029-Image Export-09.tif	0	TRUE	793.71
DL238	DL238	2	d1	../DL238_d1_r2/Snap-84029-Image Export-09.tif	3	TRUE	754.15
DL238	DL238	2	d1	../DL238_d1_r2/Snap-84028-Image Export-08.tif	1	TRUE	845.551
DL238	DL238	2	d1	../DL238_d1_r2/Snap-84028-Image Export-08.tif	2	TRUE	862.474
DL238	DL238	2	d1	../DL238_d1_r2/Snap-84074-Image Export-54.tif	0	TRUE	824.967
DL238	DL238	2	d1	../DL238_d1_r2/Snap-84074-Image Export-54.tif	1	TRUE	835.01
DL238	DL238	2	d1	../DL238_d1_r2/Snap-84077-Image Export-57.tif	0	TRUE	785.184
DL238	DL238	2	d1	../DL238_d1_r2/Snap-84077-Image Export-57.tif	1	TRUE	846.18
DL238	DL238	2	d1	../DL238_d1_r2/Snap-84048-Image Export-28.tif	2	TRUE	810.189
DL238	DL238	2	d1	../DL238_d1_r2/Snap-84048-Image Export-28.tif	3	TRUE	814.073
DL238	DL238	2	d1	../DL238_d1_r2/Snap-84070-Image Export-50.tif	0	TRUE	792.6
DL238	DL238	2	d1	../DL238_d1_r2/Snap-84070-Image Export-50.tif	6	TRUE	822.247
DL238	DL238	2	d1	../DL238_d1_r2/Snap-84049-Image Export-29.tif	0	TRUE	785.536
DL238	DL238	2	d1	../DL238_d1_r2/Snap-84071-Image Export-51.tif	0	TRUE	773.846
DL238	DL238	2	d1	../DL238_d1_r2/Snap-84071-Image Export-51.tif	1	TRUE	843.184
DL238	DL238	2	d1	../DL238_d1_r2/Snap-84072-Image Export-52.tif	0	TRUE	782.28
DL238	DL238	2	d1	../DL238_d1_r2/Snap-84073-Image Export-53.tif	0	TRUE	853.097
DL238	DL238	2	d1	../DL238_d1_r2/Snap-84066-Image Export-46.tif	2	TRUE	867.431
DL238	DL238	2	d1	../DL238_d1_r2/Snap-84066-Image Export-46.tif	3	TRUE	783.261
DL238	DL238	2	d1	../DL238_d1_r2/Snap-84067-Image Export-47.tif	1	TRUE	821.267
DL238	DL238	2	d1	../DL238_d1_r2/Snap-84067-Image Export-47.tif	2	TRUE	854.928
DL238	DL238	2	d1	../DL238_d1_r2/Snap-84064-Image Export-44.tif	0	TRUE	836.527
DL238	DL238	2	d1	../DL238_d1_r2/Snap-84064-Image Export-44.tif	1	TRUE	787.865
DL238	DL238	2	d1	../DL238_d1_r2/Snap-84065-Image Export-45.tif	0	TRUE	819.918
DL238	DL238	2	d1	../DL238_d1_r2/Snap-84065-Image Export-45.tif	1	TRUE	818.493
DL238	DL238	2	d1	../DL238_d1_r2/Snap-84089-Image Export-69.tif	0	TRUE	861.087
DL238	DL238	2	d1	../DL238_d1_r2/Snap-84062-Image Export-42.tif	0	TRUE	852.875
DL238	DL238	2	d1	../DL238_d1_r2/Snap-84063-Image Export-43.tif	0	TRUE	831.31
DL238	DL238	2	d1	../DL238_d1_r2/Snap-84063-Image Export-43.tif	1	TRUE	780.097
DL238	DL238	2	d1	../DL238_d1_r2/Snap-84058-Image Export-38.tif	1	TRUE	821.083
DL238	DL238	2	d1	../DL238_d1_r2/Snap-84060-Image Export-40.tif	0	TRUE	827.204
DL238	DL238	2	d1	../DL238_d1_r2/Snap-84060-Image Export-40.tif	1	TRUE	787.015
DL238	DL238	2	d1	../DL238_d1_r2/Snap-84059-Image Export-39.tif	0	TRUE	818.401
DL238	DL238	2	d1	../DL238_d1_r2/Snap-84061-Image Export-41.tif	1	TRUE	853.856
DL238	DL238	2	d1	../DL238_d1_r2/Snap-84061-Image Export-41.tif	2	TRUE	545.231
DL238	DL238	2	d1	../DL238_d1_r2/Snap-84061-Image Export-41.tif	6	TRUE	803.938
DL238	DL238	2	d1	../DL238_d1_r2/Snap-84061-Image Export-41.tif	8	TRUE	839.116
DL238	DL238	2	d1	../DL238_d1_r2/Snap-84038-Image Export-18.tif	0	TRUE	805.991
DL238	DL238	2	d1	../DL238_d1_r2/Snap-84026-Image Export-06.tif	0	TRUE	760.401
DL238	DL238	2	d1	../DL238_d1_r2/Snap-84026-Image Export-06.tif	1	TRUE	829.073
DL238	DL238	2	d1	../DL238_d1_r2/Snap-84026-Image Export-06.tif	3	TRUE	826.928
DL238	DL238	2	d1	../DL238_d1_r2/Snap-84027-Image Export-07.tif	0	TRUE	809.561
DL238	DL238	2	d1	../DL238_d1_r2/Snap-84027-Image Export-07.tif	1	TRUE	866.542
DL238	DL238	2	d1	../DL238_d1_r2/Snap-84024-Image Export-04.tif	0	TRUE	831.624
DL238	DL238	2	d1	../DL238_d1_r2/Snap-84025-Image Export-05.tif	0	TRUE	831.716
DL238	DL238	2	d1	../DL238_d1_r2/Snap-84025-Image Export-05.tif	3	TRUE	884.039
DL238	DL238	2	d1	../DL238_d1_r2/Snap-84025-Image Export-05.tif	6	TRUE	871.851
DL238	DL238	2	d1	../DL238_d1_r2/Snap-84025-Image Export-05.tif	8	TRUE	773.846
DL238	DL238	2	d1	../DL238_d1_r2/Snap-84022-Image Export-02.tif	0	TRUE	861.402
DL238	DL238	2	d1	../DL238_d1_r2/Snap-84022-Image Export-02.tif	4	TRUE	775.363
DL238	DL238	2	d1	../DL238_d1_r2/Snap-84022-Image Export-02.tif	5	TRUE	862.362
DL238	DL238	2	d1	../DL238_d1_r2/Snap-84023-Image Export-03.tif	0	TRUE	830.59
DL238	DL238	2	d1	../DL238_d1_r2/Snap-84023-Image Export-03.tif	1	TRUE	809.024
DL238	DL238	2	d1	../DL238_d1_r2/Snap-84021-Image Export-01.tif	1	TRUE	827.112
DL238	DL238	2	d1	../DL238_d1_r2/Snap-84021-Image Export-01.tif	2	TRUE	817.198
DL238	DL238	2	d1	../DL238_d1_r2/Snap-84021-Image Export-01.tif	3	TRUE	815.053
DL238	DL238	2	d1	../DL238_d1_r2/Snap-84041-Image Export-21.tif	0	TRUE	798.537
DL238	DL238	2	d1	../DL238_d1_r2/Snap-84095-Image Export-75.tif	0	TRUE	803.623
DL238	DL238	2	d1	../DL238_d1_r2/Snap-84079-Image Export-59.tif	0	TRUE	799.073
DL238	DL238	2	d1	../DL238_d1_r2/Snap-84079-Image Export-59.tif	1	TRUE	781.928
DL238	DL238	2	d1	../DL238_d1_r2/Snap-84079-Image Export-59.tif	2	TRUE	834.121
DL238	DL238	2	d1	../DL238_d1_r2/Snap-84040-Image Export-20.tif	0	TRUE	738.391
DL238	DL238	2	d1	../DL238_d1_r2/Snap-84094-Image Export-74.tif	0	TRUE	754.908
DL238	DL238	2	d1	../DL238_d1_r2/Snap-84078-Image Export-58.tif	0	TRUE	844.977
DL238	DL238	2	d1	../DL238_d1_r2/Snap-84043-Image Export-23.tif	0	TRUE	850.416
DL238	DL238	2	d1	../DL238_d1_r2/Snap-84043-Image Export-23.tif	1	TRUE	791.213
DL238	DL238	2	d1	../DL238_d1_r2/Snap-84043-Image Export-23.tif	2	TRUE	831.218
DL238	DL238	2	d1	../DL238_d1_r2/Snap-84043-Image Export-23.tif	6	TRUE	868.189
DL238	DL238	2	d1	../DL238_d1_r2/Snap-84096-Image Export-76.tif	0	TRUE	697.222
DL238	DL238	2	d1	../DL238_d1_r2/Snap-84045-Image Export-25.tif	0	TRUE	849.083
DL238	DL238	2	d1	../DL238_d1_r2/Snap-84093-Image Export-73.tif	0	TRUE	846.348
DL238	DL238	2	d1	../DL238_d1_r2/Snap-84093-Image Export-73.tif	1	TRUE	833.363
DL238	DL238	2	d1	../DL238_d1_r2/Snap-84046-Image Export-26.tif	0	TRUE	842.962
DL238	DL238	2	d1	../DL238_d1_r2/Snap-84046-Image Export-26.tif	1	TRUE	838.764
DL238	DL238	2	d1	../DL238_d1_r2/Snap-84092-Image Export-72.tif	0	TRUE	813.222
DL238	DL238	2	d1	../DL238_d1_r2/Snap-84092-Image Export-72.tif	1	TRUE	798.629
DL238	DL238	2	d1	../DL238_d1_r2/Snap-84087-Image Export-67.tif	1	TRUE	802.957
DL238	DL238	2	d1	../DL238_d1_r2/Snap-84087-Image Export-67.tif	4	TRUE	835.768
DL238	DL238	2	d1	../DL238_d1_r2/Snap-84087-Image Export-67.tif	5	TRUE	824.652
DL238	DL238	2	d1	../DL238_d1_r2/Snap-84086-Image Export-66.tif	5	TRUE	839.392
DL238	DL238	2	d1	../DL238_d1_r2/Snap-84086-Image Export-66.tif	6	TRUE	867.967
DL238	DL238	2	d1	../DL238_d1_r2/Snap-84052-Image Export-32.tif	0	TRUE	887.257
DL238	DL238	2	d1	../DL238_d1_r2/Snap-84052-Image Export-32.tif	3	TRUE	771.256
DL238	DL238	2	d1	../DL238_d1_r2/Snap-84052-Image Export-32.tif	5	TRUE	782.909
DL238	DL238	2	d1	../DL238_d1_r2/Snap-84051-Image Export-31.tif	2	TRUE	809.469
DL238	DL238	2	d1	../DL238_d1_r2/Snap-84051-Image Export-31.tif	3	TRUE	786.662
DL238	DL238	2	d1	../DL238_d1_r2/Snap-84085-Image Export-65.tif	0	TRUE	857.702
DL238	DL238	2	d1	../DL238_d1_r2/Snap-84069-Image Export-49.tif	0	TRUE	770.498
DL238	DL238	2	d1	../DL238_d1_r2/Snap-84084-Image Export-64.tif	1	TRUE	810.281
DL238	DL238	2	d1	../DL238_d1_r2/Snap-84084-Image Export-64.tif	2	TRUE	852.875
DL238	DL238	2	d1	../DL238_d1_r2/Snap-84084-Image Export-64.tif	3	TRUE	832.29
DL238	DL238	2	d1	../DL238_d1_r2/Snap-84084-Image Export-64.tif	4	TRUE	832.697
DL238	DL238	2	d1	../DL238_d1_r2/Snap-84057-Image Export-37.tif	4	TRUE	827.334
DL238	DL238	2	d1	../DL238_d1_r2/Snap-84083-Image Export-63.tif	0	TRUE	833.493
DL238	DL238	2	d1	../DL238_d1_r2/Snap-84083-Image Export-63.tif	1	TRUE	827.74
DL238	DL238	2	d1	../DL238_d1_r2/Snap-84056-Image Export-36.tif	1	TRUE	788.309
DL238	DL238	2	d1	../DL238_d1_r2/Snap-84056-Image Export-36.tif	2	TRUE	840.242
DL238	DL238	2	d1	../DL238_d1_r2/Snap-84082-Image Export-62.tif	0	TRUE	806.305
DL238	DL238	2	d1	../DL238_d1_r2/Snap-84082-Image Export-62.tif	1	TRUE	847.03
DL238	DL238	2	d1	../DL238_d1_r2/Snap-84082-Image Export-62.tif	2	TRUE	780.541
DL238	DL238	2	d1	../DL238_d1_r2/Snap-84081-Image Export-61.tif	0	TRUE	782.28
DL238	DL238	2	d1	../DL238_d1_r2/Snap-84081-Image Export-61.tif	8	TRUE	855.909
DL238	DL238	2	d1	../DL238_d1_r2/Snap-84055-Image Export-35.tif	0	TRUE	767.188
DL238	DL238	2	d1	../DL238_d1_r2/Snap-84055-Image Export-35.tif	1	TRUE	834.213
DL238	DL238	2	d1	../DL238_d1_r2/Snap-84055-Image Export-35.tif	3	TRUE	814.609
DL238	DL238	2	d1	../DL238_d1_r2/Snap-84080-Image Export-60.tif	6	TRUE	427.621
DL238	DL238	2	d1	../DL238_d1_r2/Snap-84080-Image Export-60.tif	7	TRUE	856.889
DL238	DL238	2	d1	../DL238_d1_r2/Snap-84080-Image Export-60.tif	9	TRUE	804.382
DL238	DL238	2	d1	../DL238_d1_r2/Snap-84080-Image Export-60.tif	10	TRUE	834.88
DL238	DL238	2	d1	../DL238_d1_r2/Snap-84054-Image Export-34.tif	2	TRUE	805.324
DL238	DL238	2	d1	../DL238_d1_r2/Snap-84034-Image Export-14.tif	0	TRUE	829.831
DL238	DL238	2	d1	../DL238_d1_r2/Snap-84034-Image Export-14.tif	2	TRUE	648.284
DL238	DL238	2	d1	../DL238_d1_r2/Snap-84035-Image Export-15.tif	2	TRUE	779.025
DL238	DL238	2	d1	../DL238_d1_r2/Snap-84035-Image Export-15.tif	6	TRUE	829.203
DL238	DL238	2	d1	../DL238_d1_r2/Snap-84036-Image Export-16.tif	2	TRUE	750.45
DL238	DL238	2	d1	../DL238_d1_r2/Snap-84030-Image Export-10.tif	0	TRUE	864.213
DL238	DL238	2	d1	../DL238_d1_r2/Snap-84030-Image Export-10.tif	1	TRUE	890.605
DL238	DL238	2	d1	../DL238_d1_r2/Snap-84030-Image Export-10.tif	2	TRUE	814.073
DL238	DL238	2	d1	../DL238_d1_r2/Snap-84031-Image Export-11.tif	0	TRUE	782.686
DL238	DL238	2	d1	../DL238_d1_r2/Snap-84032-Image Export-12.tif	0	TRUE	827.204
DL238	DL238	2	d1	../DL238_d1_r2/Snap-84032-Image Export-12.tif	1	TRUE	866.358
LRB410	LRB410/411	1	d1	../LRB410_d1_r1/Snap-83734-Image Export-29.tif	0	TRUE	900.713
LRB410	LRB410/411	1	d1	../LRB410_d1_r1/Snap-83747-Image Export-42.tif	0	TRUE	926.73
LRB410	LRB410/411	1	d1	../LRB410_d1_r1/Snap-83747-Image Export-42.tif	1	TRUE	912.132
LRB410	LRB410/411	1	d1	../LRB410_d1_r1/Snap-83747-Image Export-42.tif	2	TRUE	696.495
LRB410	LRB410/411	1	d1	../LRB410_d1_r1/Snap-83733-Image Export-28.tif	1	TRUE	733.984
LRB410	LRB410/411	1	d1	../LRB410_d1_r1/Snap-83745-Image Export-40.tif	0	TRUE	852.28
LRB410	LRB410/411	1	d1	../LRB410_d1_r1/Snap-83745-Image Export-40.tif	1	TRUE	591.298
LRB410	LRB410/411	1	d1	../LRB410_d1_r1/Snap-83746-Image Export-41.tif	0	TRUE	834.815
LRB410	LRB410/411	1	d1	../LRB410_d1_r1/Snap-83746-Image Export-41.tif	1	TRUE	926.291
LRB410	LRB410/411	1	d1	../LRB410_d1_r1/Snap-83748-Image Export-43.tif	3	TRUE	890.08
LRB410	LRB410/411	1	d1	../LRB410_d1_r1/Snap-83713-Image Export-08.tif	2	TRUE	866.129
LRB410	LRB410/411	1	d1	../LRB410_d1_r1/Snap-83713-Image Export-08.tif	6	TRUE	841.428
LRB410	LRB410/411	1	d1	../LRB410_d1_r1/Snap-83713-Image Export-08.tif	8	TRUE	652.83
LRB410	LRB410/411	1	d1	../LRB410_d1_r1/Snap-83741-Image Export-36.tif	2	TRUE	858.017
LRB410	LRB410/411	1	d1	../LRB410_d1_r1/Snap-83742-Image Export-37.tif	6	TRUE	743.467
LRB410	LRB410/411	1	d1	../LRB410_d1_r1/Snap-83722-Image Export-17.tif	0	TRUE	915.568
LRB410	LRB410/411	1	d1	../LRB410_d1_r1/Snap-83749-Image Export-44.tif	4	TRUE	804.779
LRB410	LRB410/411	1	d1	../LRB410_d1_r1/Snap-83749-Image Export-44.tif	5	TRUE	809.584
LRB410	LRB410/411	1	d1	../LRB410_d1_r1/Snap-83749-Image Export-44.tif	6	TRUE	846.764
LRB410	LRB410/411	1	d1	../LRB410_d1_r1/Snap-83752-Image Export-47.tif	0	TRUE	916.937
LRB410	LRB410/411	1	d1	../LRB410_d1_r1/Snap-83714-Image Export-09.tif	0	TRUE	672.763
LRB410	LRB410/411	1	d1	../LRB410_d1_r1/Snap-83714-Image Export-09.tif	2	TRUE	936.212
LRB410	LRB410/411	1	d1	../LRB410_d1_r1/Snap-83714-Image Export-09.tif	3	TRUE	901.901
LRB410	LRB410/411	1	d1	../LRB410_d1_r1/Snap-83721-Image Export-16.tif	0	TRUE	890.391
LRB410	LRB410/411	1	d1	../LRB410_d1_r1/Snap-83721-Image Export-16.tif	1	TRUE	945.967
LRB410	LRB410/411	1	d1	../LRB410_d1_r1/Snap-83708-Image Export-03.tif	0	TRUE	882.134
LRB410	LRB410/411	1	d1	../LRB410_d1_r1/Snap-83708-Image Export-03.tif	1	TRUE	704.259
LRB410	LRB410/411	1	d1	../LRB410_d1_r1/Snap-83727-Image Export-22.tif	1	TRUE	774.214
LRB410	LRB410/411	1	d1	../LRB410_d1_r1/Snap-83715-Image Export-10.tif	1	TRUE	954.208
LRB410	LRB410/411	1	d1	../LRB410_d1_r1/Snap-83715-Image Export-10.tif	4	TRUE	826.702
LRB410	LRB410/411	1	d1	../LRB410_d1_r1/Snap-83744-Image Export-39.tif	0	TRUE	823.963
LRB410	LRB410/411	1	d1	../LRB410_d1_r1/Snap-83744-Image Export-39.tif	1	TRUE	896.694
LRB410	LRB410/411	1	d1	../LRB410_d1_r1/Snap-83744-Image Export-39.tif	2	TRUE	912.881
LRB410	LRB410/411	1	d1	../LRB410_d1_r1/Snap-83744-Image Export-39.tif	3	TRUE	841.557
LRB410	LRB410/411	1	d1	../LRB410_d1_r1/Snap-83738-Image Export-33.tif	1	TRUE	899.252
LRB410	LRB410/411	1	d1	../LRB410_d1_r1/Snap-83738-Image Export-33.tif	2	TRUE	934.055
LRB410	LRB410/411	1	d1	../LRB410_d1_r1/Snap-83738-Image Export-33.tif	3	TRUE	612.253
LRB410	LRB410/411	1	d1	../LRB410_d1_r1/Snap-83716-Image Export-11.tif	0	TRUE	864.85
LRB410	LRB410/411	1	d1	../LRB410_d1_r1/Snap-83716-Image Export-11.tif	1	TRUE	804.287
LRB410	LRB410/411	1	d1	../LRB410_d1_r1/Snap-83726-Image Export-21.tif	0	TRUE	876.981
LRB410	LRB410/411	1	d1	../LRB410_d1_r1/Snap-83726-Image Export-21.tif	1	TRUE	862.073
LRB410	LRB410/411	1	d1	../LRB410_d1_r1/Snap-83712-Image Export-07.tif	3	TRUE	893.077
LRB410	LRB410/411	1	d1	../LRB410_d1_r1/Snap-83712-Image Export-07.tif	5	TRUE	911.784
LRB410	LRB410/411	1	d1	../LRB410_d1_r1/Snap-83712-Image Export-07.tif	7	TRUE	878.297
LRB410	LRB410/411	1	d1	../LRB410_d1_r1/Snap-83712-Image Export-07.tif	8	TRUE	915.787
LRB410	LRB410/411	1	d1	../LRB410_d1_r1/Snap-83709-Image Export-04.tif	1	TRUE	884.473
LRB410	LRB410/411	1	d1	../LRB410_d1_r1/Snap-83710-Image Export-05.tif	2	TRUE	901.772
LRB410	LRB410/411	1	d1	../LRB410_d1_r1/Snap-83710-Image Export-05.tif	4	TRUE	924.081
LRB410	LRB410/411	1	d1	../LRB410_d1_r1/Snap-83710-Image Export-05.tif	5	TRUE	767.509
LRB410	LRB410/411	1	d1	../LRB410_d1_r1/Snap-83724-Image Export-19.tif	2	TRUE	857.177
LRB410	LRB410/411	1	d1	../LRB410_d1_r1/Snap-83724-Image Export-19.tif	3	TRUE	883.156
LRB410	LRB410/411	1	d1	../LRB410_d1_r1/Snap-83711-Image Export-06.tif	0	TRUE	877.109
LRB410	LRB410/411	1	d1	../LRB410_d1_r1/Snap-83711-Image Export-06.tif	2	TRUE	908.386
LRB410	LRB410/411	1	d1	../LRB410_d1_r1/Snap-83743-Image Export-38.tif	0	TRUE	679.778
LRB410	LRB410/411	1	d1	../LRB410_d1_r1/Snap-83743-Image Export-38.tif	1	TRUE	764.277
LRB410	LRB410/411	1	d1	../LRB410_d1_r1/Snap-83732-Image Export-27.tif	0	TRUE	862.512
LRB410	LRB410/411	1	d1	../LRB410_d1_r1/Snap-83730-Image Export-25.tif	0	TRUE	736.542
LRB410	LRB410/411	1	d1	../LRB410_d1_r1/Snap-83730-Image Export-25.tif	1	TRUE	932.776
LRB410	LRB410/411	1	d1	../LRB410_d1_r1/Snap-83719-Image Export-14.tif	0	TRUE	879.849
LRB410	LRB410/411	1	d1	../LRB410_d1_r1/Snap-83719-Image Export-14.tif	1	TRUE	922.235
LRB410	LRB410/411	1	d1	../LRB410_d1_r1/Snap-83731-Image Export-26.tif	5	TRUE	870.405
LRB410	LRB410/411	1	d1	../LRB410_d1_r1/Snap-83728-Image Export-23.tif	0	TRUE	844.425
LRB410	LRB410/411	1	d1	../LRB410_d1_r1/Snap-83728-Image Export-23.tif	1	TRUE	685.862
LRB410	LRB410/411	1	d1	../LRB410_d1_r1/Snap-83707-Image Export-02.tif	1	TRUE	871.025
LRB410	LRB410/411	1	d1	../LRB410_d1_r1/Snap-83718-Image Export-13.tif	1	TRUE	799.92
LRB410	LRB410/411	1	d1	../LRB410_d1_r1/Snap-83737-Image Export-32.tif	1	TRUE	723.662
LRB410	LRB410/411	1	d1	../LRB410_d1_r1/Snap-83706-Image Export-01.tif	2	TRUE	471.194
LRB410	LRB410/411	1	d1	../LRB410_d1_r1/Snap-83706-Image Export-01.tif	3	TRUE	801.05
LRB410	LRB410/411	1	d1	../LRB410_d1_r1/Snap-83706-Image Export-01.tif	4	TRUE	704.698
LRB410	LRB410/411	1	d1	../LRB410_d1_r1/Snap-83706-Image Export-01.tif	5	TRUE	558.924
LRB410	LRB410/411	1	d1	../LRB410_d1_r1/Snap-83706-Image Export-01.tif	6	TRUE	948.744
LRB410	LRB410/411	1	d1	../LRB410_d1_r1/Snap-83706-Image Export-01.tif	7	TRUE	819.944
LRB410	LRB410/411	1	d1	../LRB410_d1_r1/Snap-83706-Image Export-01.tif	8	TRUE	706.726
LRB410	LRB410/411	1	d1	../LRB410_d1_r1/Snap-83706-Image Export-01.tif	11	TRUE	902.249
LRB410	LRB410/411	2	d1	../LRB410_d1_r2/Snap-84116-Image Export-20.tif	0	TRUE	890.513
LRB410	LRB410/411	2	d1	../LRB410_d1_r2/Snap-84117-Image Export-21.tif	2	TRUE	789.826
LRB410	LRB410/411	2	d1	../LRB410_d1_r2/Snap-84148-Image Export-52.tif	0	TRUE	863.861
LRB410	LRB410/411	2	d1	../LRB410_d1_r2/Snap-84124-Image Export-28.tif	2	TRUE	874.44
LRB410	LRB410/411	2	d1	../LRB410_d1_r2/Snap-84125-Image Export-29.tif	0	TRUE	879.933
LRB410	LRB410/411	2	d1	../LRB410_d1_r2/Snap-84114-Image Export-18.tif	1	TRUE	761.159
LRB410	LRB410/411	2	d1	../LRB410_d1_r2/Snap-84114-Image Export-18.tif	5	TRUE	863.01
LRB410	LRB410/411	2	d1	../LRB410_d1_r2/Snap-84105-Image Export-09.tif	0	TRUE	858.184
LRB410	LRB410/411	2	d1	../LRB410_d1_r2/Snap-84134-Image Export-38.tif	1	TRUE	895.691
LRB410	LRB410/411	2	d1	../LRB410_d1_r2/Snap-84135-Image Export-39.tif	0	TRUE	868.503
LRB410	LRB410/411	2	d1	../LRB410_d1_r2/Snap-84135-Image Export-39.tif	1	TRUE	861.624
LRB410	LRB410/411	2	d1	../LRB410_d1_r2/Snap-84143-Image Export-47.tif	0	TRUE	711.777
LRB410	LRB410/411	2	d1	../LRB410_d1_r2/Snap-84142-Image Export-46.tif	0	TRUE	757.275
LRB410	LRB410/411	2	d1	../LRB410_d1_r2/Snap-84142-Image Export-46.tif	1	TRUE	813.537
LRB410	LRB410/411	2	d1	../LRB410_d1_r2/Snap-84140-Image Export-44.tif	0	TRUE	880.063
LRB410	LRB410/411	2	d1	../LRB410_d1_r2/Snap-84147-Image Export-51.tif	0	TRUE	914.943
LRB410	LRB410/411	2	d1	../LRB410_d1_r2/Snap-84147-Image Export-51.tif	1	TRUE	874.662
LRB410	LRB410/411	2	d1	../LRB410_d1_r2/Snap-84146-Image Export-50.tif	0	TRUE	869.798
LRB410	LRB410/411	2	d1	../LRB410_d1_r2/Snap-84146-Image Export-50.tif	1	TRUE	834.029
LRB410	LRB410/411	2	d1	../LRB410_d1_r2/Snap-84119-Image Export-23.tif	0	TRUE	853.411
LRB410	LRB410/411	2	d1	../LRB410_d1_r2/Snap-84119-Image Export-23.tif	4	TRUE	852.561
LRB410	LRB410/411	2	d1	../LRB410_d1_r2/Snap-84119-Image Export-23.tif	6	TRUE	867.209
LRB410	LRB410/411	2	d1	../LRB410_d1_r2/Snap-84138-Image Export-42.tif	0	TRUE	801.256
LRB410	LRB410/411	2	d1	../LRB410_d1_r2/Snap-84139-Image Export-43.tif	0	TRUE	802.643
LRB410	LRB410/411	2	d1	../LRB410_d1_r2/Snap-84139-Image Export-43.tif	1	TRUE	892.658
LRB410	LRB410/411	2	d1	../LRB410_d1_r2/Snap-84131-Image Export-35.tif	1	TRUE	739.908
LRB410	LRB410/411	2	d1	../LRB410_d1_r2/Snap-84130-Image Export-34.tif	5	TRUE	820.232
LRB410	LRB410/411	2	d1	../LRB410_d1_r2/Snap-84130-Image Export-34.tif	7	TRUE	857.111
LRB410	LRB410/411	2	d1	../LRB410_d1_r2/Snap-84099-Image Export-03.tif	1	TRUE	655.072
LRB410	LRB410/411	2	d1	../LRB410_d1_r2/Snap-84101-Image Export-05.tif	0	TRUE	799.517
LRB410	LRB410/411	2	d1	../LRB410_d1_r2/Snap-84101-Image Export-05.tif	1	TRUE	961.644
LRB410	LRB410/411	2	d1	../LRB410_d1_r2/Snap-84133-Image Export-37.tif	2	TRUE	758.532
LRB410	LRB410/411	2	d1	../LRB410_d1_r2/Snap-84133-Image Export-37.tif	3	TRUE	875.513
LRB410	LRB410/411	2	d1	../LRB410_d1_r2/Snap-84133-Image Export-37.tif	5	TRUE	725.445
LRB410	LRB410/411	2	d1	../LRB410_d1_r2/Snap-84098-Image Export-02.tif	0	TRUE	961.606
LRB410	LRB410/411	2	d1	../LRB410_d1_r2/Snap-84098-Image Export-02.tif	2	TRUE	735.932
LRB410	LRB410/411	2	d1	../LRB410_d1_r2/Snap-84098-Image Export-02.tif	3	TRUE	796.836
LRB410	LRB410/411	2	d1	../LRB410_d1_r2/Snap-84132-Image Export-36.tif	0	TRUE	810.595
LRB410	LRB410/411	2	d1	../LRB410_d1_r2/Snap-84132-Image Export-36.tif	1	TRUE	874.31
LRB410	LRB410/411	2	d1	../LRB410_d1_r2/Snap-84132-Image Export-36.tif	2	TRUE	780.227
LRB410	LRB410/411	2	d1	../LRB410_d1_r2/Snap-84132-Image Export-36.tif	4	TRUE	747.99
LRB410	LRB410/411	2	d1	../LRB410_d1_r2/Snap-84107-Image Export-11.tif	3	TRUE	747.86
LRB410	LRB410/411	2	d1	../LRB410_d1_r2/Snap-84107-Image Export-11.tif	4	TRUE	825.503
LRB410	LRB410/411	2	d1	../LRB410_d1_r2/Snap-84128-Image Export-32.tif	2	TRUE	788.938
LRB410	LRB410/411	2	d1	../LRB410_d1_r2/Snap-84128-Image Export-32.tif	3	TRUE	948.161
LRB410	LRB410/411	2	d1	../LRB410_d1_r2/Snap-84129-Image Export-33.tif	0	TRUE	876.271
LRB410	LRB410/411	2	d1	../LRB410_d1_r2/Snap-84108-Image Export-12.tif	4	TRUE	795.671
LRB410	LRB410/411	2	d1	../LRB410_d1_r2/Snap-84109-Image Export-13.tif	0	TRUE	900.74
LRB410	LRB410/411	2	d1	../LRB410_d1_r2/Snap-84097-Image Export-01.tif	2	TRUE	859.126
LRB410	LRB410/411	2	d1	../LRB410_d1_r2/Snap-84097-Image Export-01.tif	3	TRUE	720.174
LRB410	LRB410/411	2	d1	../LRB410_d1_r2/Snap-84111-Image Export-15.tif	2	TRUE	745.845
LRB410	LRB410/411	2	d1	../LRB410_d1_r2/Snap-84111-Image Export-15.tif	3	TRUE	826.798
LRB410	LRB410/411	2	d1	../LRB410_d1_r2/Snap-84111-Image Export-15.tif	7	TRUE	758.884
LRB410	LRB410/411	2	d1	../LRB410_d1_r2/Snap-84111-Image Export-15.tif	8	TRUE	859.755
LRB410	LRB410/411	2	d1	../LRB410_d1_r2/Snap-84123-Image Export-27.tif	2	TRUE	892.566
LRB410	LRB410/411	2	d1	../LRB410_d1_r2/Snap-84123-Image Export-27.tif	3	TRUE	905.383
LRB410	LRB410/411	2	d1	../LRB410_d1_r2/Snap-84122-Image Export-26.tif	2	TRUE	851.58
LRB410	LRB410/411	2	d1	../LRB410_d1_r2/Snap-84110-Image Export-14.tif	4	TRUE	902.257
LRB410	LRB410/411	2	d1	../LRB410_d1_r2/Snap-84110-Image Export-14.tif	6	TRUE	753.927
LRB410	LRB410/411	2	d1	../LRB410_d1_r2/Snap-84113-Image Export-17.tif	2	TRUE	893.286
LRB410	LRB410/411	2	d1	../LRB410_d1_r2/Snap-84121-Image Export-25.tif	9	TRUE	916.498
LRB410	LRB410/411	2	d1	../LRB410_d1_r2/Snap-84121-Image Export-25.tif	10	TRUE	806.933
LRB410	LRB410/411	2	d1	../LRB410_d1_r2/Snap-84121-Image Export-25.tif	11	TRUE	682.666
LRB410	LRB410/411	2	d1	../LRB410_d1_r2/Snap-84137-Image Export-41.tif	1	TRUE	768.077
LRB410	LRB410/411	2	d1	../LRB410_d1_r2/Snap-84137-Image Export-41.tif	3	TRUE	921.103
LRB410	LRB410/411	2	d1	../LRB410_d1_r2/Snap-84137-Image Export-41.tif	4	TRUE	759.642
LRB410	LRB410/411	2	d1	../LRB410_d1_r2/Snap-84120-Image Export-24.tif	7	TRUE	798.315
LRB410	LRB410/411	2	d1	../LRB410_d1_r2/Snap-84120-Image Export-24.tif	8	TRUE	679.449
LRB410	LRB410/411	2	d1	../LRB410_d1_r2/Snap-84112-Image Export-16.tif	2	TRUE	699.681
LRB410	LRB410/411	2	d1	../LRB410_d1_r2/Snap-84112-Image Export-16.tif	3	TRUE	746.566
LRB410	LRB410/411	2	d1	../LRB410_d1_r2/Snap-84112-Image Export-16.tif	4	TRUE	880.6
LRB410	LRB410/411	2	d1	../LRB410_d1_r2/Snap-84112-Image Export-16.tif	5	TRUE	867.967
LRB410	LRB410/411	2	d1	../LRB410_d1_r2/Snap-84112-Image Export-16.tif	6	TRUE	875.957
LRB411	LRB410/411	1	d1	../LRB411_d1_r1/Snap-83687-Image Export-22.tif	6	TRUE	820.565
LRB411	LRB410/411	1	d1	../LRB411_d1_r1/Snap-83687-Image Export-22.tif	7	TRUE	821.314
LRB411	LRB410/411	1	d1	../LRB411_d1_r1/Snap-83700-Image Export-35.tif	0	TRUE	832.733
LRB411	LRB410/411	1	d1	../LRB411_d1_r1/Snap-83701-Image Export-36.tif	0	TRUE	641.229
LRB411	LRB410/411	1	d1	../LRB411_d1_r1/Snap-83674-Image Export-09.tif	0	TRUE	679.559
LRB411	LRB410/411	1	d1	../LRB411_d1_r1/Snap-83674-Image Export-09.tif	1	TRUE	812.362
LRB411	LRB410/411	1	d1	../LRB411_d1_r1/Snap-83673-Image Export-08.tif	0	TRUE	686.264
LRB411	LRB410/411	1	d1	../LRB411_d1_r1/Snap-83699-Image Export-34.tif	0	TRUE	812.8
LRB411	LRB410/411	1	d1	../LRB411_d1_r1/Snap-83684-Image Export-19.tif	2	TRUE	711.842
LRB411	LRB410/411	1	d1	../LRB411_d1_r1/Snap-83684-Image Export-19.tif	3	TRUE	539.339
LRB411	LRB410/411	1	d1	../LRB411_d1_r1/Snap-83692-Image Export-27.tif	0	TRUE	819.725
LRB411	LRB410/411	1	d1	../LRB411_d1_r1/Snap-83689-Image Export-24.tif	1	TRUE	795.334
LRB411	LRB410/411	1	d1	../LRB411_d1_r1/Snap-83689-Image Export-24.tif	2	TRUE	814.791
LRB411	LRB410/411	1	d1	../LRB411_d1_r1/Snap-83689-Image Export-24.tif	10	TRUE	753.441
LRB411	LRB410/411	1	d1	../LRB411_d1_r1/Snap-83691-Image Export-26.tif	1	TRUE	620.146
LRB411	LRB410/411	1	d1	../LRB411_d1_r1/Snap-83691-Image Export-26.tif	2	TRUE	887.394
LRB411	LRB410/411	1	d1	../LRB411_d1_r1/Snap-83691-Image Export-26.tif	3	TRUE	670.515
LRB411	LRB410/411	1	d1	../LRB411_d1_r1/Snap-83688-Image Export-23.tif	0	TRUE	679.248
LRB411	LRB410/411	1	d1	../LRB411_d1_r1/Snap-83705-Image Export-40.tif	0	TRUE	528.268
LRB411	LRB410/411	1	d1	../LRB411_d1_r1/Snap-83705-Image Export-40.tif	1	TRUE	590.11
LRB411	LRB410/411	1	d1	../LRB411_d1_r1/Snap-83667-Image Export-02.tif	0	TRUE	792.247
LRB411	LRB410/411	1	d1	../LRB411_d1_r1/Snap-83667-Image Export-02.tif	4	TRUE	927.479
LRB411	LRB410/411	1	d1	../LRB411_d1_r1/Snap-83678-Image Export-13.tif	0	TRUE	631.126
LRB411	LRB410/411	1	d1	../LRB411_d1_r1/Snap-83678-Image Export-13.tif	1	TRUE	686.483
LRB411	LRB410/411	1	d1	../LRB411_d1_r1/Snap-83694-Image Export-29.tif	3	TRUE	840.99
LRB411	LRB410/411	1	d1	../LRB411_d1_r1/Snap-83666-Image Export-01.tif	2	TRUE	863.791
LRB411	LRB410/411	1	d1	../LRB411_d1_r1/Snap-83666-Image Export-01.tif	3	TRUE	858.327
LRB411	LRB410/411	1	d1	../LRB411_d1_r1/Snap-83672-Image Export-07.tif	0	TRUE	803.008
LRB411	LRB410/411	1	d1	../LRB411_d1_r1/Snap-83670-Image Export-05.tif	0	TRUE	794.896
LRB411	LRB410/411	1	d1	../LRB411_d1_r1/Snap-83671-Image Export-06.tif	0	TRUE	682.207
LRB411	LRB410/411	1	d1	../LRB411_d1_r1/Snap-83704-Image Export-39.tif	0	TRUE	761.682
LRB411	LRB410/411	1	d1	../LRB411_d1_r1/Snap-83675-Image Export-10.tif	5	TRUE	770.596
LRB411	LRB410/411	1	d1	../LRB411_d1_r1/Snap-83682-Image Export-17.tif	0	TRUE	865.16
LRB411	LRB410/411	1	d1	../LRB411_d1_r1/Snap-83682-Image Export-17.tif	8	TRUE	544.856
LRB411	LRB410/411	1	d1	../LRB411_d1_r1/Snap-83682-Image Export-17.tif	12	TRUE	807.647
LRB411	LRB410/411	1	d1	../LRB411_d1_r1/Snap-83682-Image Export-17.tif	14	TRUE	812.891
LRB411	LRB410/411	1	d1	../LRB411_d1_r1/Snap-83668-Image Export-03.tif	0	TRUE	843.986
LRB411	LRB410/411	1	d1	../LRB411_d1_r1/Snap-83668-Image Export-03.tif	1	TRUE	914.16
LRB411	LRB410/411	1	d1	../LRB411_d1_r1/Snap-83703-Image Export-38.tif	1	TRUE	575.86
LRB411	LRB410/411	1	d1	../LRB411_d1_r1/Snap-83681-Image Export-16.tif	0	TRUE	762.431
LRB411	LRB410/411	1	d1	../LRB411_d1_r1/Snap-83681-Image Export-16.tif	1	TRUE	863.17
LRB411	LRB410/411	2	d1	../LRB411_d1_r2/Snap-84187-Image Export-38.tif	1	TRUE	856.889
LRB411	LRB410/411	2	d1	../LRB411_d1_r2/Snap-84187-Image Export-38.tif	6	TRUE	912.392
LRB411	LRB410/411	2	d1	../LRB411_d1_r2/Snap-84208-Image Export-59.tif	1	TRUE	865.063
LRB411	LRB410/411	2	d1	../LRB411_d1_r2/Snap-84197-Image Export-48.tif	0	TRUE	862.16
LRB411	LRB410/411	2	d1	../LRB411_d1_r2/Snap-84158-Image Export-09.tif	2	TRUE	894.895
LRB411	LRB410/411	2	d1	../LRB411_d1_r2/Snap-84177-Image Export-28.tif	0	TRUE	762.102
LRB411	LRB410/411	2	d1	../LRB411_d1_r2/Snap-84177-Image Export-28.tif	1	TRUE	909.895
LRB411	LRB410/411	2	d1	../LRB411_d1_r2/Snap-84177-Image Export-28.tif	3	TRUE	696.686
LRB411	LRB410/411	2	d1	../LRB411_d1_r2/Snap-84207-Image Export-58.tif	1	TRUE	813.759
LRB411	LRB410/411	2	d1	../LRB411_d1_r2/Snap-84198-Image Export-49.tif	0	TRUE	631.584
LRB411	LRB410/411	2	d1	../LRB411_d1_r2/Snap-84163-Image Export-14.tif	1	TRUE	792.822
LRB411	LRB410/411	2	d1	../LRB411_d1_r2/Snap-84157-Image Export-08.tif	0	TRUE	923.914
LRB411	LRB410/411	2	d1	../LRB411_d1_r2/Snap-84157-Image Export-08.tif	2	TRUE	908.6
LRB411	LRB410/411	2	d1	../LRB411_d1_r2/Snap-84160-Image Export-11.tif	2	TRUE	956.151
LRB411	LRB410/411	2	d1	../LRB411_d1_r2/Snap-84160-Image Export-11.tif	9	TRUE	942.132
LRB411	LRB410/411	2	d1	../LRB411_d1_r2/Snap-84165-Image Export-16.tif	0	TRUE	904.31
LRB411	LRB410/411	2	d1	../LRB411_d1_r2/Snap-84188-Image Export-39.tif	0	TRUE	828.943
LRB411	LRB410/411	2	d1	../LRB411_d1_r2/Snap-84164-Image Export-15.tif	1	TRUE	952.673
LRB411	LRB410/411	2	d1	../LRB411_d1_r2/Snap-84166-Image Export-17.tif	1	TRUE	885.556
LRB411	LRB410/411	2	d1	../LRB411_d1_r2/Snap-84166-Image Export-17.tif	6	TRUE	936.953
LRB411	LRB410/411	2	d1	../LRB411_d1_r2/Snap-84153-Image Export-04.tif	4	TRUE	953.784
LRB411	LRB410/411	2	d1	../LRB411_d1_r2/Snap-84167-Image Export-18.tif	1	TRUE	813.629
LRB411	LRB410/411	2	d1	../LRB411_d1_r2/Snap-84167-Image Export-18.tif	6	TRUE	782.594
LRB411	LRB410/411	2	d1	../LRB411_d1_r2/Snap-84203-Image Export-54.tif	0	TRUE	898.281
LRB411	LRB410/411	2	d1	../LRB411_d1_r2/Snap-84179-Image Export-30.tif	2	TRUE	856.223
LRB411	LRB410/411	2	d1	../LRB411_d1_r2/Snap-84206-Image Export-57.tif	0	TRUE	943.963
LRB411	LRB410/411	2	d1	../LRB411_d1_r2/Snap-84206-Image Export-57.tif	1	TRUE	785.85
LRB411	LRB410/411	2	d1	../LRB411_d1_r2/Snap-84201-Image Export-52.tif	1	TRUE	906.011
LRB411	LRB410/411	2	d1	../LRB411_d1_r2/Snap-84201-Image Export-52.tif	3	TRUE	893.638
LRB411	LRB410/411	2	d1	../LRB411_d1_r2/Snap-84155-Image Export-06.tif	0	TRUE	948.291
LRB411	LRB410/411	2	d1	../LRB411_d1_r2/Snap-84152-Image Export-03.tif	1	TRUE	909.933
LRB411	LRB410/411	2	d1	../LRB411_d1_r2/Snap-84200-Image Export-51.tif	0	TRUE	957.224
LRB411	LRB410/411	2	d1	../LRB411_d1_r2/Snap-84200-Image Export-51.tif	1	TRUE	878.286
LRB411	LRB410/411	2	d1	../LRB411_d1_r2/Snap-84200-Image Export-51.tif	2	TRUE	845.107
LRB411	LRB410/411	2	d1	../LRB411_d1_r2/Snap-84200-Image Export-51.tif	3	TRUE	802.237
LRB411	LRB410/411	2	d1	../LRB411_d1_r2/Snap-84205-Image Export-56.tif	1	TRUE	928.871
LRB411	LRB410/411	2	d1	../LRB411_d1_r2/Snap-84205-Image Export-56.tif	4	TRUE	871.445
LRB411	LRB410/411	2	d1	../LRB411_d1_r2/Snap-84202-Image Export-53.tif	1	TRUE	742.183
LRB411	LRB410/411	2	d1	../LRB411_d1_r2/Snap-84202-Image Export-53.tif	8	TRUE	809.318
LRB411	LRB410/411	2	d1	../LRB411_d1_r2/Snap-84199-Image Export-50.tif	0	TRUE	790.362
LRB411	LRB410/411	2	d1	../LRB411_d1_r2/Snap-84156-Image Export-07.tif	0	TRUE	901.276
LRB411	LRB410/411	2	d1	../LRB411_d1_r2/Snap-84151-Image Export-02.tif	1	TRUE	954.504
LRB411	LRB410/411	2	d1	../LRB411_d1_r2/Snap-84151-Image Export-02.tif	2	TRUE	942.262
LRB411	LRB410/411	2	d1	../LRB411_d1_r2/Snap-84159-Image Export-10.tif	2	TRUE	894.305
LRB411	LRB410/411	2	d1	../LRB411_d1_r2/Snap-84170-Image Export-21.tif	2	TRUE	898.151
LRB411	LRB410/411	2	d1	../LRB411_d1_r2/Snap-84170-Image Export-21.tif	3	TRUE	877.436
LRB411	LRB410/411	2	d1	../LRB411_d1_r2/Snap-84191-Image Export-42.tif	2	TRUE	765.357
LRB411	LRB410/411	2	d1	../LRB411_d1_r2/Snap-84196-Image Export-47.tif	3	TRUE	870.02
LRB411	LRB410/411	2	d1	../LRB411_d1_r2/Snap-84196-Image Export-47.tif	11	TRUE	746.918
LRB411	LRB410/411	2	d1	../LRB411_d1_r2/Snap-84172-Image Export-23.tif	0	TRUE	822.561
LRB411	LRB410/411	2	d1	../LRB411_d1_r2/Snap-84194-Image Export-45.tif	0	TRUE	981.248
LRB411	LRB410/411	2	d1	../LRB411_d1_r2/Snap-84194-Image Export-45.tif	1	TRUE	887.479
LRB411	LRB410/411	2	d1	../LRB411_d1_r2/Snap-84194-Image Export-45.tif	3	TRUE	962.088
LRB411	LRB410/411	2	d1	../LRB411_d1_r2/Snap-84175-Image Export-26.tif	1	TRUE	855.648
LRB411	LRB410/411	2	d1	../LRB411_d1_r2/Snap-84175-Image Export-26.tif	4	TRUE	964.455
LRB411	LRB410/411	2	d1	../LRB411_d1_r2/Snap-84169-Image Export-20.tif	1	TRUE	894.267
LRB411	LRB410/411	2	d1	../LRB411_d1_r2/Snap-84189-Image Export-40.tif	1	TRUE	723.207
LRB411	LRB410/411	2	d1	../LRB411_d1_r2/Snap-84189-Image Export-40.tif	2	TRUE	895.117
LRB411	LRB410/411	2	d1	../LRB411_d1_r2/Snap-84195-Image Export-46.tif	0	TRUE	844.295
LRB411	LRB410/411	2	d1	../LRB411_d1_r2/Snap-84195-Image Export-46.tif	1	TRUE	786.701
LRB411	LRB410/411	2	d1	../LRB411_d1_r2/Snap-84171-Image Export-22.tif	2	TRUE	820.324
LRB411	LRB410/411	2	d1	../LRB411_d1_r2/Snap-84171-Image Export-22.tif	3	TRUE	862.566
LRB411	LRB410/411	2	d1	../LRB411_d1_r2/Snap-84190-Image Export-41.tif	0	TRUE	926.634
LRB411	LRB410/411	2	d1	../LRB411_d1_r2/Snap-84190-Image Export-41.tif	2	TRUE	833.899
LRB411	LRB410/411	2	d1	../LRB411_d1_r2/Snap-84176-Image Export-27.tif	1	TRUE	920.789
LRB411	LRB410/411	2	d1	../LRB411_d1_r2/Snap-84182-Image Export-33.tif	0	TRUE	712.628
LRB411	LRB410/411	2	d1	../LRB411_d1_r2/Snap-84185-Image Export-36.tif	0	TRUE	922.527
LRB411	LRB410/411	2	d1	../LRB411_d1_r2/Snap-84185-Image Export-36.tif	1	TRUE	897.43
LRB411	LRB410/411	2	d1	../LRB411_d1_r2/Snap-84185-Image Export-36.tif	4	TRUE	799.517
LRB411	LRB410/411	2	d1	../LRB411_d1_r2/Snap-84193-Image Export-44.tif	0	TRUE	851.58
LRB411	LRB410/411	2	d1	../LRB411_d1_r2/Snap-84184-Image Export-35.tif	2	TRUE	791.841
LRB411	LRB410/411	2	d1	../LRB411_d1_r2/Snap-84184-Image Export-35.tif	3	TRUE	880.377
LRB411	LRB410/411	2	d1	../LRB411_d1_r2/Snap-84181-Image Export-32.tif	0	TRUE	902.257
LRB411	LRB410/411	2	d1	../LRB411_d1_r2/Snap-84186-Image Export-37.tif	0	TRUE	898.779
N2	N2	1	d1	../N2_d1_r1/Snap-83640-Image Export-15.tif	0	TRUE	871.537
N2	N2	1	d1	../N2_d1_r1/Snap-83640-Image Export-15.tif	1	TRUE	895.561
N2	N2	1	d1	../N2_d1_r1/Snap-83641-Image Export-16.tif	1	TRUE	891.585
N2	N2	1	d1	../N2_d1_r1/Snap-83641-Image Export-16.tif	2	TRUE	874.793
N2	N2	1	d1	../N2_d1_r1/Snap-83665-Image Export-40.tif	0	TRUE	890.697
N2	N2	1	d1	../N2_d1_r1/Snap-83634-Image Export-09.tif	1	TRUE	832.42
N2	N2	1	d1	../N2_d1_r1/Snap-83634-Image Export-09.tif	2	TRUE	866.136
N2	N2	1	d1	../N2_d1_r1/Snap-83662-Image Export-37.tif	0	TRUE	859.256
N2	N2	1	d1	../N2_d1_r1/Snap-83660-Image Export-35.tif	0	TRUE	897.929
N2	N2	1	d1	../N2_d1_r1/Snap-83660-Image Export-35.tif	1	TRUE	944.407
N2	N2	1	d1	../N2_d1_r1/Snap-83661-Image Export-36.tif	0	TRUE	839.522
N2	N2	1	d1	../N2_d1_r1/Snap-83654-Image Export-29.tif	0	TRUE	834.121
N2	N2	1	d1	../N2_d1_r1/Snap-83633-Image Export-08.tif	0	TRUE	883.503
N2	N2	1	d1	../N2_d1_r1/Snap-83655-Image Export-30.tif	0	TRUE	906.861
N2	N2	1	d1	../N2_d1_r1/Snap-83648-Image Export-23.tif	0	TRUE	839.744
N2	N2	1	d1	../N2_d1_r1/Snap-83657-Image Export-32.tif	0	TRUE	851.396
N2	N2	1	d1	../N2_d1_r1/Snap-83657-Image Export-32.tif	2	TRUE	835.73
N2	N2	1	d1	../N2_d1_r1/Snap-83657-Image Export-32.tif	5	TRUE	859.218
N2	N2	1	d1	../N2_d1_r1/Snap-83663-Image Export-38.tif	0	TRUE	877.696
N2	N2	1	d1	../N2_d1_r1/Snap-83631-Image Export-06.tif	1	TRUE	922.397
N2	N2	1	d1	../N2_d1_r1/Snap-83656-Image Export-31.tif	0	TRUE	888.46
N2	N2	1	d1	../N2_d1_r1/Snap-83656-Image Export-31.tif	2	TRUE	891.049
N2	N2	1	d1	../N2_d1_r1/Snap-83656-Image Export-31.tif	3	TRUE	866.136
N2	N2	1	d1	../N2_d1_r1/Snap-83656-Image Export-31.tif	5	TRUE	929.407
N2	N2	1	d1	../N2_d1_r1/Snap-83630-Image Export-05.tif	0	TRUE	899.982
N2	N2	1	d1	../N2_d1_r1/Snap-83630-Image Export-05.tif	2	TRUE	920.789
N2	N2	1	d1	../N2_d1_r1/Snap-83630-Image Export-05.tif	3	TRUE	919.272
N2	N2	1	d1	../N2_d1_r1/Snap-83632-Image Export-07.tif	0	TRUE	891.011
N2	N2	1	d1	../N2_d1_r1/Snap-83629-Image Export-04.tif	1	TRUE	887.257
N2	N2	1	d1	../N2_d1_r1/Snap-83629-Image Export-04.tif	3	TRUE	862.99
N2	N2	1	d1	../N2_d1_r1/Snap-83629-Image Export-04.tif	6	TRUE	895.155
N2	N2	1	d1	../N2_d1_r1/Snap-83629-Image Export-04.tif	7	TRUE	911.948
N2	N2	1	d1	../N2_d1_r1/Snap-83652-Image Export-27.tif	0	TRUE	857.962
N2	N2	1	d1	../N2_d1_r1/Snap-83636-Image Export-11.tif	0	TRUE	902.127
N2	N2	1	d1	../N2_d1_r1/Snap-83636-Image Export-11.tif	1	TRUE	856.575
N2	N2	1	d1	../N2_d1_r1/Snap-83664-Image Export-39.tif	0	TRUE	777.102
N2	N2	1	d1	../N2_d1_r1/Snap-83664-Image Export-39.tif	1	TRUE	860.957
N2	N2	1	d1	../N2_d1_r1/Snap-83637-Image Export-12.tif	0	TRUE	875.329
N2	N2	1	d1	../N2_d1_r1/Snap-83628-Image Export-03.tif	0	TRUE	918.459
N2	N2	1	d1	../N2_d1_r1/Snap-83628-Image Export-03.tif	1	TRUE	882.837
N2	N2	1	d1	../N2_d1_r1/Snap-83635-Image Export-10.tif	2	TRUE	830.774
N2	N2	1	d1	../N2_d1_r1/Snap-83635-Image Export-10.tif	5	TRUE	830.107
N2	N2	1	d1	../N2_d1_r1/Snap-83635-Image Export-10.tif	6	TRUE	799.073
N2	N2	1	d1	../N2_d1_r1/Snap-83635-Image Export-10.tif	7	TRUE	844.034
N2	N2	1	d1	../N2_d1_r1/Snap-83626-Image Export-01.tif	0	TRUE	920.566
N2	N2	1	d1	../N2_d1_r1/Snap-83626-Image Export-01.tif	1	TRUE	874.662
N2	N2	1	d1	../N2_d1_r1/Snap-83659-Image Export-34.tif	3	TRUE	867.469
N2	N2	1	d1	../N2_d1_r1/Snap-83659-Image Export-34.tif	4	TRUE	828.628
N2	N2	1	d1	../N2_d1_r1/Snap-83659-Image Export-34.tif	7	TRUE	801.884
N2	N2	1	d1	../N2_d1_r1/Snap-83659-Image Export-34.tif	8	TRUE	917.755
N2	N2	1	d1	../N2_d1_r1/Snap-83638-Image Export-13.tif	0	TRUE	880.876
N2	N2	1	d1	../N2_d1_r1/Snap-83644-Image Export-19.tif	2	TRUE	878.508
N2	N2	1	d1	../N2_d1_r1/Snap-83644-Image Export-19.tif	3	TRUE	882.431
N2	N2	1	d1	../N2_d1_r1/Snap-83644-Image Export-19.tif	5	TRUE	868.281
N2	N2	1	d1	../N2_d1_r1/Snap-83627-Image Export-02.tif	0	TRUE	941.151
N2	N2	1	d1	../N2_d1_r1/Snap-83627-Image Export-02.tif	1	TRUE	895.561
N2	N2	1	d1	../N2_d1_r1/Snap-83645-Image Export-20.tif	0	TRUE	894.489
N2	N2	1	d1	../N2_d1_r1/Snap-83645-Image Export-20.tif	1	TRUE	910.431
N2	N2	1	d1	../N2_d1_r1/Snap-83645-Image Export-20.tif	4	TRUE	842.073
N2	N2	1	d1	../N2_d1_r1/Snap-83658-Image Export-33.tif	1	TRUE	883.817
N2	N2	1	d1	../N2_d1_r1/Snap-83658-Image Export-33.tif	2	TRUE	855.779
N2	N2	1	d1	../N2_d1_r1/Snap-83658-Image Export-33.tif	13	TRUE	847.696
N2	N2	1	d1	../N2_d1_r1/Snap-83658-Image Export-33.tif	14	TRUE	903.644
N2	N2	1	d1	../N2_d1_r1/Snap-83643-Image Export-18.tif	0	TRUE	903.107
N2	N2	1	d1	../N2_d1_r1/Snap-83646-Image Export-21.tif	1	TRUE	892.88
N2	N2	1	d1	../N2_d1_r1/Snap-83646-Image Export-21.tif	2	TRUE	860.329
N2	N2	1	d1	../N2_d1_r1/Snap-83646-Image Export-21.tif	3	TRUE	903.107
N2	N2	1	d1	../N2_d1_r1/Snap-83646-Image Export-21.tif	4	TRUE	891.807
N2	N2	2	d1	../N2_d1_r2/Snap-83983-Image Export-28.tif	0	TRUE	914.851
N2	N2	2	d1	../N2_d1_r2/Snap-83983-Image Export-28.tif	2	TRUE	854.614
N2	N2	2	d1	../N2_d1_r2/Snap-84016-Image Export-61.tif	0	TRUE	825.189
N2	N2	2	d1	../N2_d1_r2/Snap-83969-Image Export-14.tif	0	TRUE	913.595
N2	N2	2	d1	../N2_d1_r2/Snap-83969-Image Export-14.tif	3	TRUE	872.165
N2	N2	2	d1	../N2_d1_r2/Snap-83970-Image Export-15.tif	0	TRUE	918.866
N2	N2	2	d1	../N2_d1_r2/Snap-83970-Image Export-15.tif	1	TRUE	853.503
N2	N2	2	d1	../N2_d1_r2/Snap-84013-Image Export-58.tif	0	TRUE	940.523
N2	N2	2	d1	../N2_d1_r2/Snap-83971-Image Export-16.tif	5	TRUE	897.837
N2	N2	2	d1	../N2_d1_r2/Snap-83971-Image Export-16.tif	7	TRUE	799.923
N2	N2	2	d1	../N2_d1_r2/Snap-83971-Image Export-16.tif	8	TRUE	858.904
N2	N2	2	d1	../N2_d1_r2/Snap-84015-Image Export-60.tif	0	TRUE	877.122
N2	N2	2	d1	../N2_d1_r2/Snap-84014-Image Export-59.tif	0	TRUE	909.581
N2	N2	2	d1	../N2_d1_r2/Snap-83984-Image Export-29.tif	1	TRUE	860.459
N2	N2	2	d1	../N2_d1_r2/Snap-84004-Image Export-49.tif	2	TRUE	892.474
N2	N2	2	d1	../N2_d1_r2/Snap-83965-Image Export-10.tif	0	TRUE	864.397
N2	N2	2	d1	../N2_d1_r2/Snap-83965-Image Export-10.tif	2	TRUE	836.174
N2	N2	2	d1	../N2_d1_r2/Snap-83994-Image Export-39.tif	1	TRUE	879.489
N2	N2	2	d1	../N2_d1_r2/Snap-83994-Image Export-39.tif	2	TRUE	892.474
N2	N2	2	d1	../N2_d1_r2/Snap-83966-Image Export-11.tif	0	TRUE	861.846
N2	N2	2	d1	../N2_d1_r2/Snap-84019-Image Export-64.tif	0	TRUE	818.899
N2	N2	2	d1	../N2_d1_r2/Snap-84019-Image Export-64.tif	1	TRUE	874.57
N2	N2	2	d1	../N2_d1_r2/Snap-83993-Image Export-38.tif	0	TRUE	815.46
N2	N2	2	d1	../N2_d1_r2/Snap-83962-Image Export-07.tif	0	TRUE	886.943
N2	N2	2	d1	../N2_d1_r2/Snap-84003-Image Export-48.tif	0	TRUE	943.296
N2	N2	2	d1	../N2_d1_r2/Snap-83961-Image Export-06.tif	0	TRUE	938.248
N2	N2	2	d1	../N2_d1_r2/Snap-83957-Image Export-02.tif	0	TRUE	873.146
N2	N2	2	d1	../N2_d1_r2/Snap-84001-Image Export-46.tif	0	TRUE	861.624
N2	N2	2	d1	../N2_d1_r2/Snap-83992-Image Export-37.tif	0	TRUE	928.871
N2	N2	2	d1	../N2_d1_r2/Snap-83989-Image Export-34.tif	0	TRUE	877.658
N2	N2	2	d1	../N2_d1_r2/Snap-83978-Image Export-23.tif	0	TRUE	873.812
N2	N2	2	d1	../N2_d1_r2/Snap-83991-Image Export-36.tif	0	TRUE	882.967
N2	N2	2	d1	../N2_d1_r2/Snap-83991-Image Export-36.tif	1	TRUE	912.484
N2	N2	2	d1	../N2_d1_r2/Snap-83956-Image Export-01.tif	0	TRUE	883.595
N2	N2	2	d1	../N2_d1_r2/Snap-83956-Image Export-01.tif	2	TRUE	819.029
N2	N2	2	d1	../N2_d1_r2/Snap-83998-Image Export-43.tif	0	TRUE	917.755
N2	N2	2	d1	../N2_d1_r2/Snap-84006-Image Export-51.tif	0	TRUE	916.813
N2	N2	2	d1	../N2_d1_r2/Snap-84007-Image Export-52.tif	0	TRUE	887.387
N2	N2	2	d1	../N2_d1_r2/Snap-83964-Image Export-09.tif	0	TRUE	928.15
N2	N2	2	d1	../N2_d1_r2/Snap-83964-Image Export-09.tif	1	TRUE	877.788
N2	N2	2	d1	../N2_d1_r2/Snap-83999-Image Export-44.tif	0	TRUE	935.252
N2	N2	2	d1	../N2_d1_r2/Snap-83987-Image Export-32.tif	0	TRUE	953.562
N2	N2	2	d1	../N2_d1_r2/Snap-83987-Image Export-32.tif	1	TRUE	907.436
N2	N2	2	d1	../N2_d1_r2/Snap-83985-Image Export-30.tif	0	TRUE	915.296
N2	N2	2	d1	../N2_d1_r2/Snap-84008-Image Export-53.tif	0	TRUE	930.035
N2	N2	2	d1	../N2_d1_r2/Snap-83996-Image Export-41.tif	2	TRUE	891.233
N2	N2	2	d1	../N2_d1_r2/Snap-83996-Image Export-41.tif	3	TRUE	902.349
N2	N2	2	d1	../N2_d1_r2/Snap-83996-Image Export-41.tif	4	TRUE	777.01
N2	N2	2	d1	../N2_d1_r2/Snap-83980-Image Export-25.tif	0	TRUE	881.098
N2	N2	2	d1	../N2_d1_r2/Snap-83958-Image Export-03.tif	0	TRUE	919.938
N2	N2	2	d1	../N2_d1_r2/Snap-83975-Image Export-20.tif	1	TRUE	854.966
N2	N2	2	d1	../N2_d1_r2/Snap-84011-Image Export-56.tif	0	TRUE	855.334
N2	N2	2	d1	../N2_d1_r2/Snap-83973-Image Export-18.tif	0	TRUE	957.76
N2	N2	2	d1	../N2_d1_r2/Snap-84010-Image Export-55.tif	0	TRUE	875.735
N2	N2	2	d1	../N2_d1_r2/Snap-83995-Image Export-40.tif	3	TRUE	447.355
N2	N2	2	d1	../N2_d1_r2/Snap-83995-Image Export-40.tif	4	TRUE	788.938
N2	N2	2	d1	../N2_d1_r2/Snap-83995-Image Export-40.tif	6	TRUE	928.779
N2	N2	2	d1	../N2_d1_r2/Snap-84012-Image Export-57.tif	0	TRUE	872.165
N2	N2	2	d1	../N2_d1_r2/Snap-84020-Image Export-65.tif	0	TRUE	940.393
N2	N2	2	d1	../N2_d1_r2/Snap-84009-Image Export-54.tif	0	TRUE	853.319
N2	N2	2	d1	../N2_d1_r2/Snap-84009-Image Export-54.tif	1	TRUE	911.412
N2	N2	2	d1	../N2_d1_r2/Snap-83976-Image Export-21.tif	0	TRUE	900.648
N2	N2	4	d1	../N2_d1_r4/Snap-86031-Image Export-80.tif	0	TRUE	798.445
N2	N2	4	d1	../N2_d1_r4/Snap-86031-Image Export-80.tif	1	TRUE	892.214
N2	N2	4	d1	../N2_d1_r4/Snap-86036-Image Export-85.tif	0	TRUE	883.373
N2	N2	4	d1	../N2_d1_r4/Snap-86036-Image Export-85.tif	1	TRUE	869.706
N2	N2	4	d1	../N2_d1_r4/Snap-85963-Image Export-12.tif	0	TRUE	841.445
N2	N2	4	d1	../N2_d1_r4/Snap-86033-Image Export-82.tif	0	TRUE	912.836
N2	N2	4	d1	../N2_d1_r4/Snap-86033-Image Export-82.tif	2	TRUE	865.286
N2	N2	4	d1	../N2_d1_r4/Snap-85961-Image Export-10.tif	0	TRUE	916.184
N2	N2	4	d1	../N2_d1_r4/Snap-85961-Image Export-10.tif	1	TRUE	903.958
N2	N2	4	d1	../N2_d1_r4/Snap-86018-Image Export-67.tif	0	TRUE	869.078
N2	N2	4	d1	../N2_d1_r4/Snap-85966-Image Export-15.tif	0	TRUE	876.677
N2	N2	4	d1	../N2_d1_r4/Snap-86032-Image Export-81.tif	0	TRUE	901.591
N2	N2	4	d1	../N2_d1_r4/Snap-86032-Image Export-81.tif	1	TRUE	889.126
N2	N2	4	d1	../N2_d1_r4/Snap-86035-Image Export-84.tif	0	TRUE	862.604
N2	N2	4	d1	../N2_d1_r4/Snap-85967-Image Export-16.tif	1	TRUE	877.788
N2	N2	4	d1	../N2_d1_r4/Snap-85967-Image Export-16.tif	2	TRUE	926.596
N2	N2	4	d1	../N2_d1_r4/Snap-85967-Image Export-16.tif	3	TRUE	869.76
N2	N2	4	d1	../N2_d1_r4/Snap-86037-Image Export-86.tif	0	TRUE	848.363
N2	N2	4	d1	../N2_d1_r4/Snap-86037-Image Export-86.tif	1	TRUE	871.721
N2	N2	4	d1	../N2_d1_r4/Snap-85962-Image Export-11.tif	0	TRUE	879.397
N2	N2	4	d1	../N2_d1_r4/Snap-85962-Image Export-11.tif	1	TRUE	897.614
N2	N2	4	d1	../N2_d1_r4/Snap-85965-Image Export-14.tif	0	TRUE	832.957
N2	N2	4	d1	../N2_d1_r4/Snap-85989-Image Export-38.tif	0	TRUE	866.266
N2	N2	4	d1	../N2_d1_r4/Snap-85989-Image Export-38.tif	1	TRUE	856.093
N2	N2	4	d1	../N2_d1_r4/Snap-86000-Image Export-49.tif	0	TRUE	860.551
N2	N2	4	d1	../N2_d1_r4/Snap-86000-Image Export-49.tif	1	TRUE	888.774
N2	N2	4	d1	../N2_d1_r4/Snap-85999-Image Export-48.tif	1	TRUE	854.392
N2	N2	4	d1	../N2_d1_r4/Snap-85999-Image Export-48.tif	2	TRUE	859.923
N2	N2	4	d1	../N2_d1_r4/Snap-86030-Image Export-79.tif	0	TRUE	839.836
N2	N2	4	d1	../N2_d1_r4/Snap-85964-Image Export-13.tif	0	TRUE	909.987
N2	N2	4	d1	../N2_d1_r4/Snap-85979-Image Export-28.tif	0	TRUE	874.126
N2	N2	4	d1	../N2_d1_r4/Snap-86009-Image Export-58.tif	0	TRUE	933.513
N2	N2	4	d1	../N2_d1_r4/Snap-86020-Image Export-69.tif	0	TRUE	867.653
N2	N2	4	d1	../N2_d1_r4/Snap-86014-Image Export-63.tif	0	TRUE	906.677
N2	N2	4	d1	../N2_d1_r4/Snap-86010-Image Export-59.tif	0	TRUE	885.87
N2	N2	4	d1	../N2_d1_r4/Snap-86010-Image Export-59.tif	1	TRUE	839.078
N2	N2	4	d1	../N2_d1_r4/Snap-86010-Image Export-59.tif	2	TRUE	888.904
N2	N2	4	d1	../N2_d1_r4/Snap-85959-Image Export-08.tif	0	TRUE	909.267
N2	N2	4	d1	../N2_d1_r4/Snap-86015-Image Export-64.tif	0	TRUE	861.624
N2	N2	4	d1	../N2_d1_r4/Snap-86012-Image Export-61.tif	0	TRUE	899.039
N2	N2	4	d1	../N2_d1_r4/Snap-86017-Image Export-66.tif	0	TRUE	887.793
N2	N2	4	d1	../N2_d1_r4/Snap-86016-Image Export-65.tif	0	TRUE	879.749
N2	N2	4	d1	../N2_d1_r4/Snap-86011-Image Export-60.tif	0	TRUE	877.658
N2	N2	4	d1	../N2_d1_r4/Snap-86011-Image Export-60.tif	1	TRUE	858.682
N2	N2	4	d1	../N2_d1_r4/Snap-86013-Image Export-62.tif	0	TRUE	859.348
N2	N2	4	d1	../N2_d1_r4/Snap-86038-Image Export-87.tif	0	TRUE	852.783
N2	N2	4	d1	../N2_d1_r4/Snap-86038-Image Export-87.tif	1	TRUE	894.933
N2	N2	4	d1	../N2_d1_r4/Snap-85980-Image Export-29.tif	0	TRUE	886.499
N2	N2	4	d1	../N2_d1_r4/Snap-86024-Image Export-73.tif	0	TRUE	845.735
N2	N2	4	d1	../N2_d1_r4/Snap-85983-Image Export-32.tif	0	TRUE	850.286
N2	N2	4	d1	../N2_d1_r4/Snap-85994-Image Export-43.tif	0	TRUE	884.928
N2	N2	4	d1	../N2_d1_r4/Snap-85986-Image Export-35.tif	0	TRUE	938.822
N2	N2	4	d1	../N2_d1_r4/Snap-85981-Image Export-30.tif	0	TRUE	841.537
N2	N2	4	d1	../N2_d1_r4/Snap-85981-Image Export-30.tif	1	TRUE	885.648
N2	N2	4	d1	../N2_d1_r4/Snap-85987-Image Export-36.tif	0	TRUE	880.469
N2	N2	4	d1	../N2_d1_r4/Snap-85970-Image Export-19.tif	0	TRUE	857.111
N2	N2	4	d1	../N2_d1_r4/Snap-86039-Image Export-88.tif	0	TRUE	953.784
N2	N2	4	d1	../N2_d1_r4/Snap-86039-Image Export-88.tif	1	TRUE	855.817
N2	N2	4	d1	../N2_d1_r4/Snap-85985-Image Export-34.tif	0	TRUE	837.561
N2	N2	4	d1	../N2_d1_r4/Snap-85982-Image Export-31.tif	0	TRUE	860.015
N2	N2	4	d1	../N2_d1_r4/Snap-85969-Image Export-18.tif	0	TRUE	901.498
N2	N2	4	d1	../N2_d1_r4/Snap-85969-Image Export-18.tif	1	TRUE	888.46
N2	N2	4	d1	../N2_d1_r4/Snap-85969-Image Export-18.tif	2	TRUE	912.484
N2	N2	4	d1	../N2_d1_r4/Snap-85974-Image Export-23.tif	0	TRUE	850.86
N2	N2	4	d1	../N2_d1_r4/Snap-85974-Image Export-23.tif	1	TRUE	853.818
N2	N2	4	d1	../N2_d1_r4/Snap-85974-Image Export-23.tif	2	TRUE	830.145
N2	N2	4	d1	../N2_d1_r4/Snap-85995-Image Export-44.tif	0	TRUE	868.281
N2	N2	4	d1	../N2_d1_r4/Snap-85973-Image Export-22.tif	0	TRUE	881.45
N2	N2	4	d1	../N2_d1_r4/Snap-85992-Image Export-41.tif	0	TRUE	872.701
N2	N2	4	d1	../N2_d1_r4/Snap-85976-Image Export-25.tif	0	TRUE	880.508
N2	N2	4	d1	../N2_d1_r4/Snap-86008-Image Export-57.tif	0	TRUE	873.146
N2	N2	4	d1	../N2_d1_r4/Snap-85971-Image Export-20.tif	0	TRUE	894.137
N2	N2	4	d1	../N2_d1_r4/Snap-86027-Image Export-76.tif	0	TRUE	912.576
N2	N2	4	d1	../N2_d1_r4/Snap-85996-Image Export-45.tif	0	TRUE	842.204
N2	N2	4	d1	../N2_d1_r4/Snap-85977-Image Export-26.tif	0	TRUE	905.383
N2	N2	4	d1	../N2_d1_r4/Snap-85977-Image Export-26.tif	3	TRUE	882.615
N2	N2	4	d1	../N2_d1_r4/Snap-85958-Image Export-07.tif	0	TRUE	883.779
N2	N2	4	d1	../N2_d1_r4/Snap-86026-Image Export-75.tif	0	TRUE	884.798
N2	N2	4	d1	../N2_d1_r4/Snap-85975-Image Export-24.tif	0	TRUE	838.634
N2	N2	4	d1	../N2_d1_r4/Snap-85975-Image Export-24.tif	1	TRUE	861.938
N2	N2	4	d1	../N2_d1_r4/Snap-85972-Image Export-21.tif	0	TRUE	850.064
N2	N2	4	d1	../N2_d1_r4/Snap-85972-Image Export-21.tif	1	TRUE	886.629
N2	N2	4	d1	../N2_d1_r4/Snap-85993-Image Export-42.tif	0	TRUE	879.841
N2	N2	4	d1	../N2_d1_r4/Snap-85984-Image Export-33.tif	0	TRUE	907.75
N2	N2	4	d1	../N2_d1_r4/Snap-86023-Image Export-72.tif	0	TRUE	873.774
N2	N2	4	d1	../N2_d1_r4/Snap-85953-Image Export-02.tif	0	TRUE	869.354
N2	N2	4	d1	../N2_d1_r4/Snap-86002-Image Export-51.tif	0	TRUE	901.721
N2	N2	4	d1	../N2_d1_r4/Snap-86005-Image Export-54.tif	0	TRUE	904.846
N2	N2	4	d1	../N2_d1_r4/Snap-86028-Image Export-77.tif	0	TRUE	863.417
N2	N2	4	d1	../N2_d1_r4/Snap-86007-Image Export-56.tif	0	TRUE	852.431
N2	N2	4	d1	../N2_d1_r4/Snap-85957-Image Export-06.tif	0	TRUE	901.629
N2	N2	4	d1	../N2_d1_r4/Snap-85978-Image Export-27.tif	0	TRUE	932.755
N2	N2	4	d1	../N2_d1_r4/Snap-85978-Image Export-27.tif	1	TRUE	824.3
N2	N2	4	d1	../N2_d1_r4/Snap-85978-Image Export-27.tif	3	TRUE	912.078
N2	N2	4	d1	../N2_d1_r4/Snap-86006-Image Export-55.tif	0	TRUE	883.779
N2	N2	4	d1	../N2_d1_r4/Snap-85955-Image Export-04.tif	0	TRUE	841.667
N2	N2	4	d1	../N2_d1_r4/Snap-86003-Image Export-52.tif	0	TRUE	935.436
N2	N2	4	d1	../N2_d1_r4/Snap-86004-Image Export-53.tif	0	TRUE	871.537
N2	N2	4	d1	../N2_d1_r4/Snap-86004-Image Export-53.tif	1	TRUE	882.392
N2	N2	4	d1	../N2_d1_r4/Snap-85988-Image Export-37.tif	0	TRUE	899.982
N2	N2	4	d1	../N2_d1_r4/Snap-85988-Image Export-37.tif	1	TRUE	900.832
N2	N2	4	d1	../N2_d1_r4/Snap-85954-Image Export-03.tif	1	TRUE	753.483
DL238	DL238	4	d1	../DL238_d1_r4/Snap-86073-Image Export-34.tif	0	TRUE	778.488
DL238	DL238	4	d1	../DL238_d1_r4/Snap-86093-Image Export-54.tif	0	TRUE	774.956
DL238	DL238	4	d1	../DL238_d1_r4/Snap-86079-Image Export-40.tif	0	TRUE	828.406
DL238	DL238	4	d1	../DL238_d1_r4/Snap-86079-Image Export-40.tif	1	TRUE	876.938
DL238	DL238	4	d1	../DL238_d1_r4/Snap-86091-Image Export-52.tif	0	TRUE	803.846
DL238	DL238	4	d1	../DL238_d1_r4/Snap-86045-Image Export-06.tif	0	TRUE	849.435
DL238	DL238	4	d1	../DL238_d1_r4/Snap-86045-Image Export-06.tif	1	TRUE	744.42
DL238	DL238	4	d1	../DL238_d1_r4/Snap-86096-Image Export-57.tif	1	TRUE	823.005
DL238	DL238	4	d1	../DL238_d1_r4/Snap-86096-Image Export-57.tif	2	TRUE	756.295
DL238	DL238	4	d1	../DL238_d1_r4/Snap-86042-Image Export-03.tif	0	TRUE	766.078
DL238	DL238	4	d1	../DL238_d1_r4/Snap-86072-Image Export-33.tif	0	TRUE	850.064
DL238	DL238	4	d1	../DL238_d1_r4/Snap-86040-Image Export-01.tif	0	TRUE	834.474
DL238	DL238	4	d1	../DL238_d1_r4/Snap-86094-Image Export-55.tif	0	TRUE	824.967
DL238	DL238	4	d1	../DL238_d1_r4/Snap-86094-Image Export-55.tif	1	TRUE	865.508
DL238	DL238	4	d1	../DL238_d1_r4/Snap-86075-Image Export-36.tif	0	TRUE	820.416
DL238	DL238	4	d1	../DL238_d1_r4/Snap-86069-Image Export-30.tif	0	TRUE	825.189
DL238	DL238	4	d1	../DL238_d1_r4/Snap-86089-Image Export-50.tif	0	TRUE	843.942
DL238	DL238	4	d1	../DL238_d1_r4/Snap-86046-Image Export-07.tif	0	TRUE	800.184
DL238	DL238	4	d1	../DL238_d1_r4/Snap-86092-Image Export-53.tif	0	TRUE	851.266
DL238	DL238	4	d1	../DL238_d1_r4/Snap-86041-Image Export-02.tif	0	TRUE	831.754
DL238	DL238	4	d1	../DL238_d1_r4/Snap-86095-Image Export-56.tif	0	TRUE	857.87
DL238	DL238	4	d1	../DL238_d1_r4/Snap-86074-Image Export-35.tif	0	TRUE	820.232
DL238	DL238	4	d1	../DL238_d1_r4/Snap-86090-Image Export-51.tif	0	TRUE	829.165
DL238	DL238	4	d1	../DL238_d1_r4/Snap-86044-Image Export-05.tif	0	TRUE	814.609
DL238	DL238	4	d1	../DL238_d1_r4/Snap-86076-Image Export-37.tif	0	TRUE	847.788
DL238	DL238	4	d1	../DL238_d1_r4/Snap-86062-Image Export-23.tif	1	TRUE	873.552
DL238	DL238	4	d1	../DL238_d1_r4/Snap-86062-Image Export-23.tif	2	TRUE	780.671
DL238	DL238	4	d1	../DL238_d1_r4/Snap-86062-Image Export-23.tif	3	TRUE	619.617
DL238	DL238	4	d1	../DL238_d1_r4/Snap-86050-Image Export-11.tif	0	TRUE	804.068
DL238	DL238	4	d1	../DL238_d1_r4/Snap-86084-Image Export-45.tif	0	TRUE	779.783
DL238	DL238	4	d1	../DL238_d1_r4/Snap-86065-Image Export-26.tif	1	TRUE	862.566
DL238	DL238	4	d1	../DL238_d1_r4/Snap-86049-Image Export-10.tif	0	TRUE	820.546
DL238	DL238	4	d1	../DL238_d1_r4/Snap-86060-Image Export-21.tif	0	TRUE	797.372
DL238	DL238	4	d1	../DL238_d1_r4/Snap-86081-Image Export-42.tif	0	TRUE	834.305
DL238	DL238	4	d1	../DL238_d1_r4/Snap-86055-Image Export-16.tif	0	TRUE	812.112
DL238	DL238	4	d1	../DL238_d1_r4/Snap-86086-Image Export-47.tif	0	TRUE	853.411
DL238	DL238	4	d1	../DL238_d1_r4/Snap-86052-Image Export-13.tif	0	TRUE	792.416
DL238	DL238	4	d1	../DL238_d1_r4/Snap-86061-Image Export-22.tif	0	TRUE	845.015
DL238	DL238	4	d1	../DL238_d1_r4/Snap-86080-Image Export-41.tif	1	TRUE	870.242
DL238	DL238	4	d1	../DL238_d1_r4/Snap-86054-Image Export-15.tif	0	TRUE	533.264
DL238	DL238	4	d1	../DL238_d1_r4/Snap-86056-Image Export-17.tif	0	TRUE	782.058
DL238	DL238	4	d1	../DL238_d1_r4/Snap-86056-Image Export-17.tif	1	TRUE	872.609
DL238	DL238	4	d1	../DL238_d1_r4/Snap-86056-Image Export-17.tif	2	TRUE	839.798
DL238	DL238	4	d1	../DL238_d1_r4/Snap-86082-Image Export-43.tif	0	TRUE	770.314
DL238	DL238	4	d1	../DL238_d1_r4/Snap-86051-Image Export-12.tif	0	TRUE	858.146
DL238	DL238	4	d1	../DL238_d1_r4/Snap-86064-Image Export-25.tif	4	TRUE	807.247
DL238	DL238	4	d1	../DL238_d1_r4/Snap-86063-Image Export-24.tif	0	TRUE	750.45
DL238	DL238	4	d1	../DL238_d1_r4/Snap-86053-Image Export-14.tif	0	TRUE	868.909
DL238	DL238	4	d1	../DL238_d1_r4/Snap-86083-Image Export-44.tif	0	TRUE	837.913
DL238	DL238	4	d1	../DL238_d1_r4/Snap-86099-Image Export-60.tif	0	TRUE	801.256
DL238	DL238	4	d1	../DL238_d1_r4/Snap-86099-Image Export-60.tif	1	TRUE	809.653
DL238	DL238	4	d1	../DL238_d1_r4/Snap-86087-Image Export-48.tif	0	TRUE	797.778
DL238	DL238	4	d1	../DL238_d1_r4/Snap-86098-Image Export-59.tif	0	TRUE	895.691
DL238	DL238	4	d1	../DL238_d1_r4/Snap-86098-Image Export-59.tif	2	TRUE	788.846
DL238	DL238	4	d1	../DL238_d1_r4/Snap-86101-Image Export-62.tif	0	TRUE	814.961
DL238	DL238	4	d1	../DL238_d1_r4/Snap-86078-Image Export-39.tif	0	TRUE	806.397
DL238	DL238	4	d1	../DL238_d1_r4/Snap-86057-Image Export-18.tif	0	TRUE	852.377
DL238	DL238	4	d1	../DL238_d1_r4/Snap-86100-Image Export-61.tif	0	TRUE	847.068
DL238	DL238	4	d1	../DL238_d1_r4/Snap-86100-Image Export-61.tif	1	TRUE	803.938
DL238	DL238	4	d1	../DL238_d1_r4/Snap-86102-Image Export-63.tif	0	TRUE	788.087
DL238	DL238	4	d1	../DL238_d1_r4/Snap-86067-Image Export-28.tif	0	TRUE	860.421
DL238	DL238	4	d1	../DL238_d1_r4/Snap-86088-Image Export-49.tif	0	TRUE	841.537
DL238	DL238	4	d1	../DL238_d1_r4/Snap-86088-Image Export-49.tif	1	TRUE	809.653
DL238	DL238	4	d1	../DL238_d1_r4/Snap-86097-Image Export-58.tif	0	TRUE	846.716
DL238	DL238	4	d1	../DL238_d1_r4/Snap-86058-Image Export-19.tif	0	TRUE	420.297
DL238	DL238	4	d1	../DL238_d1_r4/Snap-86058-Image Export-19.tif	1	TRUE	829.571
DL238	DL238	4	d1	../DL238_d1_r4/Snap-86077-Image Export-38.tif	0	TRUE	830.682
DL238	DL238	4	d1	../DL238_d1_r4/Snap-86068-Image Export-29.tif	1	TRUE	775.179
DL238	DL238	4	d1	../DL238_d1_r4/Snap-86047-Image Export-08.tif	0	TRUE	850.064
DL238	DL238	4	d1	../DL238_d1_r4/Snap-86059-Image Export-20.tif	1	TRUE	795.319
DL238	DL238	4	d1	../DL238_d1_r4/Snap-86059-Image Export-20.tif	2	TRUE	445.08
DL238	DL238	4	d1	../DL238_d1_r4/Snap-86059-Image Export-20.tif	3	TRUE	821.841
LRB410	LRB410/411	4	d1	../LRB410_d1_r4/Snap-86130-Image Export-28.tif	2	TRUE	848.991
LRB410	LRB410/411	4	d1	../LRB410_d1_r4/Snap-86174-Image Export-72.tif	0	TRUE	787.865
LRB410	LRB410/411	4	d1	../LRB410_d1_r4/Snap-86131-Image Export-29.tif	0	TRUE	786.386
LRB410	LRB410/411	4	d1	../LRB410_d1_r4/Snap-86131-Image Export-29.tif	1	TRUE	830.774
LRB410	LRB410/411	4	d1	../LRB410_d1_r4/Snap-86131-Image Export-29.tif	2	TRUE	782.541
LRB410	LRB410/411	4	d1	../LRB410_d1_r4/Snap-86131-Image Export-29.tif	3	TRUE	883.503
LRB410	LRB410/411	4	d1	../LRB410_d1_r4/Snap-86175-Image Export-73.tif	0	TRUE	797.594
LRB410	LRB410/411	4	d1	../LRB410_d1_r4/Snap-86144-Image Export-42.tif	0	TRUE	924.358
LRB410	LRB410/411	4	d1	../LRB410_d1_r4/Snap-86145-Image Export-43.tif	0	TRUE	737.725
LRB410	LRB410/411	4	d1	../LRB410_d1_r4/Snap-86177-Image Export-75.tif	0	TRUE	626.183
LRB410	LRB410/411	4	d1	../LRB410_d1_r4/Snap-86176-Image Export-74.tif	0	TRUE	867.078
LRB410	LRB410/411	4	d1	../LRB410_d1_r4/Snap-86176-Image Export-74.tif	1	TRUE	913.151
LRB410	LRB410/411	4	d1	../LRB410_d1_r4/Snap-86147-Image Export-45.tif	0	TRUE	873.774
LRB410	LRB410/411	4	d1	../LRB410_d1_r4/Snap-86147-Image Export-45.tif	1	TRUE	901.406
LRB410	LRB410/411	4	d1	../LRB410_d1_r4/Snap-86146-Image Export-44.tif	1	TRUE	721.913
LRB410	LRB410/411	4	d1	../LRB410_d1_r4/Snap-86146-Image Export-44.tif	2	TRUE	791.343
LRB410	LRB410/411	4	d1	../LRB410_d1_r4/Snap-86168-Image Export-66.tif	1	TRUE	790.677
LRB410	LRB410/411	4	d1	../LRB410_d1_r4/Snap-86173-Image Export-71.tif	1	TRUE	847.827
LRB410	LRB410/411	4	d1	../LRB410_d1_r4/Snap-86169-Image Export-67.tif	0	TRUE	801.348
LRB410	LRB410/411	4	d1	../LRB410_d1_r4/Snap-86143-Image Export-41.tif	0	TRUE	836.489
LRB410	LRB410/411	4	d1	../LRB410_d1_r4/Snap-86143-Image Export-41.tif	1	TRUE	731.604
LRB410	LRB410/411	4	d1	../LRB410_d1_r4/Snap-86143-Image Export-41.tif	2	TRUE	849.657
LRB410	LRB410/411	4	d1	../LRB410_d1_r4/Snap-86158-Image Export-56.tif	0	TRUE	868.189
LRB410	LRB410/411	4	d1	../LRB410_d1_r4/Snap-86158-Image Export-56.tif	1	TRUE	886.499
LRB410	LRB410/411	4	d1	../LRB410_d1_r4/Snap-86142-Image Export-40.tif	0	TRUE	812.334
LRB410	LRB410/411	4	d1	../LRB410_d1_r4/Snap-86142-Image Export-40.tif	1	TRUE	715.662
LRB410	LRB410/411	4	d1	../LRB410_d1_r4/Snap-86159-Image Export-57.tif	0	TRUE	819.918
LRB410	LRB410/411	4	d1	../LRB410_d1_r4/Snap-86157-Image Export-55.tif	1	TRUE	863.769
LRB410	LRB410/411	4	d1	../LRB410_d1_r4/Snap-86157-Image Export-55.tif	2	TRUE	853.319
LRB410	LRB410/411	4	d1	../LRB410_d1_r4/Snap-86156-Image Export-54.tif	0	TRUE	781.522
LRB410	LRB410/411	4	d1	../LRB410_d1_r4/Snap-86156-Image Export-54.tif	1	TRUE	883.817
LRB410	LRB410/411	4	d1	../LRB410_d1_r4/Snap-86167-Image Export-65.tif	0	TRUE	853.948
LRB410	LRB410/411	4	d1	../LRB410_d1_r4/Snap-86167-Image Export-65.tif	1	TRUE	709.372
LRB410	LRB410/411	4	d1	../LRB410_d1_r4/Snap-86166-Image Export-64.tif	0	TRUE	834.121
LRB410	LRB410/411	4	d1	../LRB410_d1_r4/Snap-86148-Image Export-46.tif	1	TRUE	901.591
LRB410	LRB410/411	4	d1	../LRB410_d1_r4/Snap-86148-Image Export-46.tif	2	TRUE	785.498
LRB410	LRB410/411	4	d1	../LRB410_d1_r4/Snap-86148-Image Export-46.tif	3	TRUE	877.788
LRB410	LRB410/411	4	d1	../LRB410_d1_r4/Snap-86148-Image Export-46.tif	4	TRUE	745.623
LRB410	LRB410/411	4	d1	../LRB410_d1_r4/Snap-86152-Image Export-50.tif	0	TRUE	874.662
LRB410	LRB410/411	4	d1	../LRB410_d1_r4/Snap-86152-Image Export-50.tif	1	TRUE	853.948
LRB410	LRB410/411	4	d1	../LRB410_d1_r4/Snap-86152-Image Export-50.tif	2	TRUE	757.904
LRB410	LRB410/411	4	d1	../LRB410_d1_r4/Snap-86152-Image Export-50.tif	3	TRUE	771.701
LRB410	LRB410/411	4	d1	../LRB410_d1_r4/Snap-86149-Image Export-47.tif	0	TRUE	874.126
LRB410	LRB410/411	4	d1	../LRB410_d1_r4/Snap-86149-Image Export-47.tif	1	TRUE	625.332
LRB410	LRB410/411	4	d1	../LRB410_d1_r4/Snap-86149-Image Export-47.tif	2	TRUE	801.44
LRB410	LRB410/411	4	d1	../LRB410_d1_r4/Snap-86178-Image Export-76.tif	0	TRUE	873.368
LRB410	LRB410/411	4	d1	../LRB410_d1_r4/Snap-86179-Image Export-77.tif	0	TRUE	840.687
LRB410	LRB410/411	4	d1	../LRB410_d1_r4/Snap-86179-Image Export-77.tif	1	TRUE	692.71
LRB410	LRB410/411	4	d1	../LRB410_d1_r4/Snap-86162-Image Export-60.tif	1	TRUE	886.813
LRB410	LRB410/411	4	d1	../LRB410_d1_r4/Snap-86154-Image Export-52.tif	0	TRUE	912.928
LRB410	LRB410/411	4	d1	../LRB410_d1_r4/Snap-86161-Image Export-59.tif	0	TRUE	921.011
LRB410	LRB410/411	4	d1	../LRB410_d1_r4/Snap-86110-Image Export-08.tif	0	TRUE	852.561
LRB410	LRB410/411	4	d1	../LRB410_d1_r4/Snap-86110-Image Export-08.tif	4	TRUE	740.667
LRB410	LRB410/411	4	d1	../LRB410_d1_r4/Snap-86110-Image Export-08.tif	5	TRUE	906.585
LRB410	LRB410/411	4	d1	../LRB410_d1_r4/Snap-86160-Image Export-58.tif	0	TRUE	887.349
LRB410	LRB410/411	4	d1	../LRB410_d1_r4/Snap-86155-Image Export-53.tif	0	TRUE	830.904
LRB410	LRB410/411	4	d1	../LRB410_d1_r4/Snap-86155-Image Export-53.tif	1	TRUE	780.319
LRB410	LRB410/411	4	d1	../LRB410_d1_r4/Snap-86155-Image Export-53.tif	2	TRUE	841.223
LRB410	LRB410/411	4	d1	../LRB410_d1_r4/Snap-86111-Image Export-09.tif	2	TRUE	804.696
LRB410	LRB410/411	4	d1	../LRB410_d1_r4/Snap-86164-Image Export-62.tif	0	TRUE	882.615
LRB410	LRB410/411	4	d1	../LRB410_d1_r4/Snap-86165-Image Export-63.tif	0	TRUE	802.735
LRB410	LRB410/411	4	d1	../LRB410_d1_r4/Snap-86117-Image Export-15.tif	0	TRUE	788.493
LRB410	LRB410/411	4	d1	../LRB410_d1_r4/Snap-86116-Image Export-14.tif	0	TRUE	692.357
LRB410	LRB410/411	4	d1	../LRB410_d1_r4/Snap-86116-Image Export-14.tif	1	TRUE	733.657
LRB410	LRB410/411	4	d1	../LRB410_d1_r4/Snap-86127-Image Export-25.tif	2	TRUE	870.556
LRB410	LRB410/411	4	d1	../LRB410_d1_r4/Snap-86127-Image Export-25.tif	4	TRUE	861.808
LRB410	LRB410/411	4	d1	../LRB410_d1_r4/Snap-86140-Image Export-38.tif	0	TRUE	793.71
LRB410	LRB410/411	4	d1	../LRB410_d1_r4/Snap-86140-Image Export-38.tif	1	TRUE	771.072
LRB410	LRB410/411	4	d1	../LRB410_d1_r4/Snap-86140-Image Export-38.tif	2	TRUE	805.584
LRB410	LRB410/411	4	d1	../LRB410_d1_r4/Snap-86126-Image Export-24.tif	1	TRUE	477.761
LRB410	LRB410/411	4	d1	../LRB410_d1_r4/Snap-86126-Image Export-24.tif	2	TRUE	889.716
LRB410	LRB410/411	4	d1	../LRB410_d1_r4/Snap-86141-Image Export-39.tif	0	TRUE	706.913
LRB410	LRB410/411	4	d1	../LRB410_d1_r4/Snap-86141-Image Export-39.tif	1	TRUE	896.764
LRB410	LRB410/411	4	d1	../LRB410_d1_r4/Snap-86108-Image Export-06.tif	4	TRUE	555.772
LRB410	LRB410/411	4	d1	../LRB410_d1_r4/Snap-86113-Image Export-11.tif	0	TRUE	807.101
LRB410	LRB410/411	4	d1	../LRB410_d1_r4/Snap-86113-Image Export-11.tif	5	TRUE	852.247
LRB410	LRB410/411	4	d1	../LRB410_d1_r4/Snap-86112-Image Export-10.tif	0	TRUE	850.508
LRB410	LRB410/411	4	d1	../LRB410_d1_r4/Snap-86112-Image Export-10.tif	1	TRUE	816.57
LRB410	LRB410/411	4	d1	../LRB410_d1_r4/Snap-86112-Image Export-10.tif	3	TRUE	851.711
LRB410	LRB410/411	4	d1	../LRB410_d1_r4/Snap-86123-Image Export-21.tif	1	TRUE	667.666
LRB410	LRB410/411	4	d1	../LRB410_d1_r4/Snap-86138-Image Export-36.tif	1	TRUE	827.112
LRB410	LRB410/411	4	d1	../LRB410_d1_r4/Snap-86122-Image Export-20.tif	0	TRUE	646.101
LRB410	LRB410/411	4	d1	../LRB410_d1_r4/Snap-86122-Image Export-20.tif	2	TRUE	791.971
LRB410	LRB410/411	4	d1	../LRB410_d1_r4/Snap-86122-Image Export-20.tif	3	TRUE	805.324
LRB410	LRB410/411	4	d1	../LRB410_d1_r4/Snap-86114-Image Export-12.tif	1	TRUE	801.348
LRB410	LRB410/411	4	d1	../LRB410_d1_r4/Snap-86114-Image Export-12.tif	3	TRUE	729.643
LRB410	LRB410/411	4	d1	../LRB410_d1_r4/Snap-86121-Image Export-19.tif	2	TRUE	777.01
LRB410	LRB410/411	4	d1	../LRB410_d1_r4/Snap-86151-Image Export-49.tif	0	TRUE	843.054
LRB410	LRB410/411	4	d1	../LRB410_d1_r4/Snap-86151-Image Export-49.tif	2	TRUE	832.198
LRB410	LRB410/411	4	d1	../LRB410_d1_r4/Snap-86151-Image Export-49.tif	3	TRUE	770.85
LRB410	LRB410/411	4	d1	../LRB410_d1_r4/Snap-86120-Image Export-18.tif	0	TRUE	830.329
LRB410	LRB410/411	4	d1	../LRB410_d1_r4/Snap-86115-Image Export-13.tif	0	TRUE	785.942
LRB410	LRB410/411	4	d1	../LRB410_d1_r4/Snap-86124-Image Export-22.tif	0	TRUE	837.469
LRB410	LRB410/411	4	d1	../LRB410_d1_r4/Snap-86125-Image Export-23.tif	1	TRUE	856.851
LRB410	LRB410/411	4	d1	../LRB410_d1_r4/Snap-86182-Image Export-80.tif	0	TRUE	865.508
LRB410	LRB410/411	4	d1	../LRB410_d1_r4/Snap-86183-Image Export-81.tif	0	TRUE	875.735
LRB410	LRB410/411	4	d1	../LRB410_d1_r4/Snap-86183-Image Export-81.tif	1	TRUE	766.836
LRB410	LRB410/411	4	d1	../LRB410_d1_r4/Snap-86183-Image Export-81.tif	2	TRUE	796.928
LRB410	LRB410/411	4	d1	../LRB410_d1_r4/Snap-86134-Image Export-32.tif	0	TRUE	791.657
LRB410	LRB410/411	4	d1	../LRB410_d1_r4/Snap-86170-Image Export-68.tif	0	TRUE	852.875
LRB410	LRB410/411	4	d1	../LRB410_d1_r4/Snap-86170-Image Export-68.tif	1	TRUE	698.333
LRB410	LRB410/411	4	d1	../LRB410_d1_r4/Snap-86135-Image Export-33.tif	3	TRUE	664.227
LRB410	LRB410/411	4	d1	../LRB410_d1_r4/Snap-86171-Image Export-69.tif	0	TRUE	767.595
LRB410	LRB410/411	4	d1	../LRB410_d1_r4/Snap-86171-Image Export-69.tif	1	TRUE	829.295
LRB410	LRB410/411	4	d1	../LRB410_d1_r4/Snap-86105-Image Export-03.tif	0	TRUE	836.803
LRB410	LRB410/411	4	d1	../LRB410_d1_r4/Snap-86105-Image Export-03.tif	1	TRUE	892.344
LRB410	LRB410/411	4	d1	../LRB410_d1_r4/Snap-86105-Image Export-03.tif	2	TRUE	764.599
LRB410	LRB410/411	4	d1	../LRB410_d1_r4/Snap-86136-Image Export-34.tif	0	TRUE	805.991
LRB410	LRB410/411	4	d1	../LRB410_d1_r4/Snap-86136-Image Export-34.tif	1	TRUE	855.817
LRB410	LRB410/411	4	d1	../LRB410_d1_r4/Snap-86136-Image Export-34.tif	2	TRUE	946.774
LRB410	LRB410/411	4	d1	../LRB410_d1_r4/Snap-86107-Image Export-05.tif	0	TRUE	917.127
LRB410	LRB410/411	4	d1	../LRB410_d1_r4/Snap-86106-Image Export-04.tif	0	TRUE	949.938
LRB410	LRB410/411	4	d1	../LRB410_d1_r4/Snap-86180-Image Export-78.tif	0	TRUE	677.357
LRB410	LRB410/411	4	d1	../LRB410_d1_r4/Snap-86180-Image Export-78.tif	1	TRUE	782.594
LRB410	LRB410/411	4	d1	../LRB410_d1_r4/Snap-86133-Image Export-31.tif	0	TRUE	825.189
LRB410	LRB410/411	4	d1	../LRB410_d1_r4/Snap-86133-Image Export-31.tif	2	TRUE	746.067
LRB410	LRB410/411	4	d1	../LRB410_d1_r4/Snap-86133-Image Export-31.tif	3	TRUE	918.643
LRB410	LRB410/411	4	d1	../LRB410_d1_r4/Snap-86128-Image Export-26.tif	2	TRUE	823.358
LRB410	LRB410/411	4	d1	../LRB410_d1_r4/Snap-86181-Image Export-79.tif	0	TRUE	849.972
LRB410	LRB410/411	4	d1	../LRB410_d1_r4/Snap-86132-Image Export-30.tif	0	TRUE	834.88
LRB410	LRB410/411	4	d1	../LRB410_d1_r4/Snap-86118-Image Export-16.tif	0	TRUE	835.86
LRB410	LRB410/411	4	d1	../LRB410_d1_r4/Snap-86118-Image Export-16.tif	1	TRUE	839.078
LRB410	LRB410/411	4	d1	../LRB410_d1_r4/Snap-86103-Image Export-01.tif	0	TRUE	900.962
LRB410	LRB410/411	4	d1	../LRB410_d1_r4/Snap-86119-Image Export-17.tif	1	TRUE	916.368
LRB411	LRB410/411	4	d1	../LRB411_d1_r4/Snap-86195-Image Export-12.tif	0	TRUE	774.734
LRB411	LRB410/411	4	d1	../LRB411_d1_r4/Snap-86195-Image Export-12.tif	1	TRUE	763.933
LRB411	LRB410/411	4	d1	../LRB411_d1_r4/Snap-86228-Image Export-45.tif	1	TRUE	776.657
LRB411	LRB410/411	4	d1	../LRB411_d1_r4/Snap-86228-Image Export-45.tif	2	TRUE	672.753
LRB411	LRB410/411	4	d1	../LRB411_d1_r4/Snap-86233-Image Export-50.tif	0	TRUE	821.527
LRB411	LRB410/411	4	d1	../LRB411_d1_r4/Snap-86254-Image Export-71.tif	0	TRUE	874.847
LRB411	LRB410/411	4	d1	../LRB411_d1_r4/Snap-86196-Image Export-13.tif	2	TRUE	820.508
LRB411	LRB410/411	4	d1	../LRB411_d1_r4/Snap-86196-Image Export-13.tif	3	TRUE	845.643
LRB411	LRB410/411	4	d1	../LRB411_d1_r4/Snap-86196-Image Export-13.tif	4	TRUE	773.532
LRB411	LRB410/411	4	d1	../LRB411_d1_r4/Snap-86194-Image Export-11.tif	0	TRUE	752.411
LRB411	LRB410/411	4	d1	../LRB411_d1_r4/Snap-86230-Image Export-47.tif	0	TRUE	680.613
LRB411	LRB410/411	4	d1	../LRB411_d1_r4/Snap-86189-Image Export-06.tif	1	TRUE	731.068
LRB411	LRB410/411	4	d1	../LRB411_d1_r4/Snap-86189-Image Export-06.tif	2	TRUE	861.402
LRB411	LRB410/411	4	d1	../LRB411_d1_r4/Snap-86250-Image Export-67.tif	0	TRUE	865.378
LRB411	LRB410/411	4	d1	../LRB411_d1_r4/Snap-86193-Image Export-10.tif	0	TRUE	898.243
LRB411	LRB410/411	4	d1	../LRB411_d1_r4/Snap-86193-Image Export-10.tif	1	TRUE	693.874
LRB411	LRB410/411	4	d1	../LRB411_d1_r4/Snap-86220-Image Export-37.tif	0	TRUE	775.363
LRB411	LRB410/411	4	d1	../LRB411_d1_r4/Snap-86236-Image Export-53.tif	0	TRUE	776.879
LRB411	LRB410/411	4	d1	../LRB411_d1_r4/Snap-86236-Image Export-53.tif	1	TRUE	860.329
LRB411	LRB410/411	4	d1	../LRB411_d1_r4/Snap-86249-Image Export-66.tif	0	TRUE	841.131
LRB411	LRB410/411	4	d1	../LRB411_d1_r4/Snap-86249-Image Export-66.tif	1	TRUE	839.836
LRB411	LRB410/411	4	d1	../LRB411_d1_r4/Snap-86190-Image Export-07.tif	0	TRUE	810.059
LRB411	LRB410/411	4	d1	../LRB411_d1_r4/Snap-86190-Image Export-07.tif	1	TRUE	771.164
LRB411	LRB410/411	4	d1	../LRB411_d1_r4/Snap-86253-Image Export-70.tif	0	TRUE	863.991
LRB411	LRB410/411	4	d1	../LRB411_d1_r4/Snap-86253-Image Export-70.tif	1	TRUE	728.256
LRB411	LRB410/411	4	d1	../LRB411_d1_r4/Snap-86253-Image Export-70.tif	2	TRUE	805.454
LRB411	LRB410/411	4	d1	../LRB411_d1_r4/Snap-86234-Image Export-51.tif	0	TRUE	582.202
LRB411	LRB410/411	4	d1	../LRB411_d1_r4/Snap-86248-Image Export-65.tif	0	TRUE	818.271
LRB411	LRB410/411	4	d1	../LRB411_d1_r4/Snap-86235-Image Export-52.tif	0	TRUE	829.257
LRB411	LRB410/411	4	d1	../LRB411_d1_r4/Snap-86197-Image Export-14.tif	0	TRUE	830.774
LRB411	LRB410/411	4	d1	../LRB411_d1_r4/Snap-86188-Image Export-05.tif	0	TRUE	858.498
LRB411	LRB410/411	4	d1	../LRB411_d1_r4/Snap-86257-Image Export-74.tif	0	TRUE	648.062
LRB411	LRB410/411	4	d1	../LRB411_d1_r4/Snap-86257-Image Export-74.tif	1	TRUE	682.482
LRB411	LRB410/411	4	d1	../LRB411_d1_r4/Snap-86257-Image Export-74.tif	2	TRUE	742.942
LRB411	LRB410/411	4	d1	../LRB411_d1_r4/Snap-86257-Image Export-74.tif	3	TRUE	873.016
LRB411	LRB410/411	4	d1	../LRB411_d1_r4/Snap-86200-Image Export-17.tif	2	TRUE	621.854
LRB411	LRB410/411	4	d1	../LRB411_d1_r4/Snap-86243-Image Export-60.tif	0	TRUE	794.377
LRB411	LRB410/411	4	d1	../LRB411_d1_r4/Snap-86224-Image Export-41.tif	1	TRUE	848.233
LRB411	LRB410/411	4	d1	../LRB411_d1_r4/Snap-86224-Image Export-41.tif	2	TRUE	848.049
LRB411	LRB410/411	4	d1	../LRB411_d1_r4/Snap-86199-Image Export-16.tif	3	TRUE	887.295
LRB411	LRB410/411	4	d1	../LRB411_d1_r4/Snap-86226-Image Export-43.tif	0	TRUE	758.662
LRB411	LRB410/411	4	d1	../LRB411_d1_r4/Snap-86198-Image Export-15.tif	0	TRUE	684.053
LRB411	LRB410/411	4	d1	../LRB411_d1_r4/Snap-86198-Image Export-15.tif	1	TRUE	739.724
LRB411	LRB410/411	4	d1	../LRB411_d1_r4/Snap-86198-Image Export-15.tif	2	TRUE	481.515
LRB411	LRB410/411	4	d1	../LRB411_d1_r4/Snap-86247-Image Export-64.tif	0	TRUE	820.102
LRB411	LRB410/411	4	d1	../LRB411_d1_r4/Snap-86258-Image Export-75.tif	0	TRUE	642.791
LRB411	LRB410/411	4	d1	../LRB411_d1_r4/Snap-86258-Image Export-75.tif	1	TRUE	804.88
LRB411	LRB410/411	4	d1	../LRB411_d1_r4/Snap-86225-Image Export-42.tif	0	TRUE	877.436
LRB411	LRB410/411	4	d1	../LRB411_d1_r4/Snap-86225-Image Export-42.tif	1	TRUE	606.318
LRB411	LRB410/411	4	d1	../LRB411_d1_r4/Snap-86187-Image Export-04.tif	0	TRUE	863.861
LRB411	LRB410/411	4	d1	../LRB411_d1_r4/Snap-86187-Image Export-04.tif	2	TRUE	855.687
LRB411	LRB410/411	4	d1	../LRB411_d1_r4/Snap-86245-Image Export-62.tif	0	TRUE	887.793
LRB411	LRB410/411	4	d1	../LRB411_d1_r4/Snap-86245-Image Export-62.tif	1	TRUE	805.991
LRB411	LRB410/411	4	d1	../LRB411_d1_r4/Snap-86238-Image Export-55.tif	0	TRUE	838.764
LRB411	LRB410/411	4	d1	../LRB411_d1_r4/Snap-86185-Image Export-02.tif	0	TRUE	822.247
LRB411	LRB410/411	4	d1	../LRB411_d1_r4/Snap-86227-Image Export-44.tif	0	TRUE	819.566
LRB411	LRB410/411	4	d1	../LRB411_d1_r4/Snap-86246-Image Export-63.tif	0	TRUE	862.474
LRB411	LRB410/411	4	d1	../LRB411_d1_r4/Snap-86246-Image Export-63.tif	1	TRUE	892.658
LRB411	LRB410/411	4	d1	../LRB411_d1_r4/Snap-86223-Image Export-40.tif	0	TRUE	814.609
LRB411	LRB410/411	4	d1	../LRB411_d1_r4/Snap-86223-Image Export-40.tif	1	TRUE	677.526
LRB411	LRB410/411	4	d1	../LRB411_d1_r4/Snap-86223-Image Export-40.tif	3	TRUE	708.522
LRB411	LRB410/411	4	d1	../LRB411_d1_r4/Snap-86244-Image Export-61.tif	0	TRUE	721.154
LRB411	LRB410/411	4	d1	../LRB411_d1_r4/Snap-86239-Image Export-56.tif	0	TRUE	819.788
LRB411	LRB410/411	4	d1	../LRB411_d1_r4/Snap-86242-Image Export-59.tif	0	TRUE	817.513
LRB411	LRB410/411	4	d1	../LRB411_d1_r4/Snap-86219-Image Export-36.tif	1	TRUE	874.126
LRB411	LRB410/411	4	d1	../LRB411_d1_r4/Snap-86219-Image Export-36.tif	2	TRUE	639.444
LRB411	LRB410/411	4	d1	../LRB411_d1_r4/Snap-86203-Image Export-20.tif	0	TRUE	824.078
LRB411	LRB410/411	4	d1	../LRB411_d1_r4/Snap-86203-Image Export-20.tif	1	TRUE	797.372
LRB411	LRB410/411	4	d1	../LRB411_d1_r4/Snap-86240-Image Export-57.tif	0	TRUE	780.449
LRB411	LRB410/411	4	d1	../LRB411_d1_r4/Snap-86207-Image Export-24.tif	0	TRUE	759.328
LRB411	LRB410/411	4	d1	../LRB411_d1_r4/Snap-86207-Image Export-24.tif	1	TRUE	703.381
LRB411	LRB410/411	4	d1	../LRB411_d1_r4/Snap-86207-Image Export-24.tif	2	TRUE	560.322
LRB411	LRB410/411	4	d1	../LRB411_d1_r4/Snap-86218-Image Export-35.tif	1	TRUE	621.54
LRB411	LRB410/411	4	d1	../LRB411_d1_r4/Snap-86205-Image Export-22.tif	0	TRUE	627.569
LRB411	LRB410/411	4	d1	../LRB411_d1_r4/Snap-86205-Image Export-22.tif	1	TRUE	762.324
LRB411	LRB410/411	4	d1	../LRB411_d1_r4/Snap-86205-Image Export-22.tif	3	TRUE	823.228
LRB411	LRB410/411	4	d1	../LRB411_d1_r4/Snap-86201-Image Export-18.tif	0	TRUE	857.832
LRB411	LRB410/411	4	d1	../LRB411_d1_r4/Snap-86201-Image Export-18.tif	1	TRUE	631.768
LRB411	LRB410/411	4	d1	../LRB411_d1_r4/Snap-86201-Image Export-18.tif	2	TRUE	741.869
LRB411	LRB410/411	4	d1	../LRB411_d1_r4/Snap-86206-Image Export-23.tif	1	TRUE	629.845
LRB411	LRB410/411	4	d1	../LRB411_d1_r4/Snap-86204-Image Export-21.tif	0	TRUE	674.584
LRB411	LRB410/411	4	d1	../LRB411_d1_r4/Snap-86204-Image Export-21.tif	1	TRUE	680.521
LRB411	LRB410/411	4	d1	../LRB411_d1_r4/Snap-86202-Image Export-19.tif	1	TRUE	875.773
LRB411	LRB410/411	4	d1	../LRB411_d1_r4/Snap-86202-Image Export-19.tif	2	TRUE	732.454
LRB411	LRB410/411	4	d1	../LRB411_d1_r4/Snap-86202-Image Export-19.tif	3	TRUE	755.889
LRB411	LRB410/411	4	d1	../LRB411_d1_r4/Snap-86191-Image Export-08.tif	0	TRUE	868.005
LRB411	LRB410/411	4	d1	../LRB411_d1_r4/Snap-86215-Image Export-32.tif	1	TRUE	903.774
LRB411	LRB410/411	4	d1	../LRB411_d1_r4/Snap-86221-Image Export-38.tif	0	TRUE	658.29
LRB411	LRB410/411	4	d1	../LRB411_d1_r4/Snap-86221-Image Export-38.tif	1	TRUE	773.218
LRB411	LRB410/411	4	d1	../LRB411_d1_r4/Snap-86221-Image Export-38.tif	2	TRUE	782.28
LRB411	LRB410/411	4	d1	../LRB411_d1_r4/Snap-86192-Image Export-09.tif	0	TRUE	801.57
LRB411	LRB410/411	4	d1	../LRB411_d1_r4/Snap-86214-Image Export-31.tif	0	TRUE	795.097
LRB411	LRB410/411	4	d1	../LRB411_d1_r4/Snap-86214-Image Export-31.tif	1	TRUE	859.571
LRB411	LRB410/411	4	d1	../LRB411_d1_r4/Snap-86214-Image Export-31.tif	2	TRUE	895.784
LRB411	LRB410/411	4	d1	../LRB411_d1_r4/Snap-86216-Image Export-33.tif	0	TRUE	857.203
LRB411	LRB410/411	4	d1	../LRB411_d1_r4/Snap-86252-Image Export-69.tif	0	TRUE	784.517
LRB411	LRB410/411	4	d1	../LRB411_d1_r4/Snap-86222-Image Export-39.tif	3	TRUE	877.88
LRB411	LRB410/411	4	d1	../LRB411_d1_r4/Snap-86222-Image Export-39.tif	4	TRUE	764.691
LRB411	LRB410/411	4	d1	../LRB411_d1_r4/Snap-86210-Image Export-27.tif	0	TRUE	807.155
LRB411	LRB410/411	4	d1	../LRB411_d1_r4/Snap-86210-Image Export-27.tif	1	TRUE	909.803
LRB411	LRB410/411	4	d1	../LRB411_d1_r4/Snap-86232-Image Export-49.tif	0	TRUE	532.506
LRB411	LRB410/411	4	d1	../LRB411_d1_r4/Snap-86209-Image Export-26.tif	1	TRUE	619.487
LRB411	LRB410/411	4	d1	../LRB411_d1_r4/Snap-86213-Image Export-30.tif	0	TRUE	881.358
LRB411	LRB410/411	4	d1	../LRB411_d1_r4/Snap-86213-Image Export-30.tif	1	TRUE	816.57
LRB411	LRB410/411	4	d1	../LRB411_d1_r4/Snap-86208-Image Export-25.tif	1	TRUE	618.193
LRB411	LRB410/411	4	d1	../LRB411_d1_r4/Snap-86231-Image Export-48.tif	0	TRUE	734.86
LRB411	LRB410/411	4	d1	../LRB411_d1_r4/Snap-86217-Image Export-34.tif	1	TRUE	559.786
N2	N2	4	d11	../N2_d11_r4/Snap-88055-Image Export-72.tif	0	TRUE	470.819
N2	N2	4	d11	../N2_d11_r4/Snap-87986-Image Export-03.tif	0	TRUE	470.974
N2	N2	4	d11	../N2_d11_r4/Snap-88056-Image Export-73.tif	0	TRUE	655.187
N2	N2	4	d11	../N2_d11_r4/Snap-88030-Image Export-47.tif	0	TRUE	644.381
N2	N2	4	d11	../N2_d11_r4/Snap-88054-Image Export-71.tif	0	TRUE	737.621
N2	N2	4	d11	../N2_d11_r4/Snap-88029-Image Export-46.tif	0	TRUE	685.927
N2	N2	4	d11	../N2_d11_r4/Snap-88049-Image Export-66.tif	0	TRUE	556.34
N2	N2	4	d11	../N2_d11_r4/Snap-87987-Image Export-04.tif	0	TRUE	596.614
N2	N2	4	d11	../N2_d11_r4/Snap-88057-Image Export-74.tif	0	TRUE	408.784
N2	N2	4	d11	../N2_d11_r4/Snap-88048-Image Export-65.tif	0	TRUE	598.038
N2	N2	4	d11	../N2_d11_r4/Snap-87990-Image Export-07.tif	0	TRUE	505.202
N2	N2	4	d11	../N2_d11_r4/Snap-88059-Image Export-76.tif	0	TRUE	337.286
N2	N2	4	d11	../N2_d11_r4/Snap-87989-Image Export-06.tif	0	TRUE	483.854
N2	N2	4	d11	../N2_d11_r4/Snap-88000-Image Export-17.tif	0	TRUE	612.491
N2	N2	4	d11	../N2_d11_r4/Snap-87988-Image Export-05.tif	0	TRUE	684.948
N2	N2	4	d11	../N2_d11_r4/Snap-88058-Image Export-75.tif	0	TRUE	436.508
N2	N2	4	d11	../N2_d11_r4/Snap-87997-Image Export-14.tif	0	TRUE	474.985
N2	N2	4	d11	../N2_d11_r4/Snap-88047-Image Export-64.tif	0	TRUE	619.132
N2	N2	4	d11	../N2_d11_r4/Snap-88041-Image Export-58.tif	0	TRUE	451.635
N2	N2	4	d11	../N2_d11_r4/Snap-88045-Image Export-62.tif	1	TRUE	435.293
N2	N2	4	d11	../N2_d11_r4/Snap-88038-Image Export-55.tif	0	TRUE	484.914
N2	N2	4	d11	../N2_d11_r4/Snap-88038-Image Export-55.tif	1	TRUE	238.593
N2	N2	4	d11	../N2_d11_r4/Snap-88039-Image Export-56.tif	0	TRUE	612.007
N2	N2	4	d11	../N2_d11_r4/Snap-88042-Image Export-59.tif	0	TRUE	463.255
N2	N2	4	d11	../N2_d11_r4/Snap-88042-Image Export-59.tif	2	TRUE	332.7
N2	N2	4	d11	../N2_d11_r4/Snap-88019-Image Export-36.tif	1	TRUE	220.844
N2	N2	4	d11	../N2_d11_r4/Snap-88019-Image Export-36.tif	2	TRUE	488.815
N2	N2	4	d11	../N2_d11_r4/Snap-88019-Image Export-36.tif	3	TRUE	472.719
N2	N2	4	d11	../N2_d11_r4/Snap-88040-Image Export-57.tif	0	TRUE	493.181
N2	N2	4	d11	../N2_d11_r4/Snap-88040-Image Export-57.tif	1	TRUE	493.026
N2	N2	4	d11	../N2_d11_r4/Snap-88001-Image Export-18.tif	0	TRUE	449.251
N2	N2	4	d11	../N2_d11_r4/Snap-88005-Image Export-22.tif	0	TRUE	623.097
N2	N2	4	d11	../N2_d11_r4/Snap-88004-Image Export-21.tif	0	TRUE	705.776
N2	N2	4	d11	../N2_d11_r4/Snap-88051-Image Export-68.tif	0	TRUE	515.388
N2	N2	4	d11	../N2_d11_r4/Snap-88015-Image Export-32.tif	0	TRUE	347.142
N2	N2	4	d11	../N2_d11_r4/Snap-88015-Image Export-32.tif	1	TRUE	611.587
N2	N2	4	d11	../N2_d11_r4/Snap-88015-Image Export-32.tif	2	TRUE	309.808
N2	N2	4	d11	../N2_d11_r4/Snap-88052-Image Export-69.tif	0	TRUE	626.294
N2	N2	4	d11	../N2_d11_r4/Snap-88014-Image Export-31.tif	0	TRUE	493.491
N2	N2	4	d11	../N2_d11_r4/Snap-88013-Image Export-30.tif	0	TRUE	600.432
N2	N2	4	d11	../N2_d11_r4/Snap-88032-Image Export-49.tif	0	TRUE	296.883
N2	N2	4	d11	../N2_d11_r4/Snap-88060-Image Export-77.tif	0	TRUE	522.339
DL238	DL238	4	d11	../DL238_d11_r4/Snap-88125-Image Export-65.tif	1	TRUE	614.555
DL238	DL238	4	d11	../DL238_d11_r4/Snap-88117-Image Export-57.tif	0	TRUE	633.465
DL238	DL238	4	d11	../DL238_d11_r4/Snap-88117-Image Export-57.tif	1	TRUE	514.155
DL238	DL238	4	d11	../DL238_d11_r4/Snap-88082-Image Export-22.tif	0	TRUE	661.116
DL238	DL238	4	d11	../DL238_d11_r4/Snap-88124-Image Export-64.tif	0	TRUE	639.42
DL238	DL238	4	d11	../DL238_d11_r4/Snap-88115-Image Export-55.tif	1	TRUE	655.407
DL238	DL238	4	d11	../DL238_d11_r4/Snap-88080-Image Export-20.tif	0	TRUE	469.76
DL238	DL238	4	d11	../DL238_d11_r4/Snap-88114-Image Export-54.tif	0	TRUE	694.33
DL238	DL238	4	d11	../DL238_d11_r4/Snap-88114-Image Export-54.tif	1	TRUE	633.922
DL238	DL238	4	d11	../DL238_d11_r4/Snap-88081-Image Export-21.tif	0	TRUE	524.431
DL238	DL238	4	d11	../DL238_d11_r4/Snap-88081-Image Export-21.tif	1	TRUE	667.008
DL238	DL238	4	d11	../DL238_d11_r4/Snap-88086-Image Export-26.tif	0	TRUE	634.843
DL238	DL238	4	d11	../DL238_d11_r4/Snap-88113-Image Export-53.tif	0	TRUE	508.509
DL238	DL238	4	d11	../DL238_d11_r4/Snap-88087-Image Export-27.tif	0	TRUE	504.426
DL238	DL238	4	d11	../DL238_d11_r4/Snap-88120-Image Export-60.tif	0	TRUE	548.447
DL238	DL238	4	d11	../DL238_d11_r4/Snap-88120-Image Export-60.tif	1	TRUE	671.968
DL238	DL238	4	d11	../DL238_d11_r4/Snap-88112-Image Export-52.tif	0	TRUE	644.884
DL238	DL238	4	d11	../DL238_d11_r4/Snap-88084-Image Export-24.tif	0	TRUE	633.483
DL238	DL238	4	d11	../DL238_d11_r4/Snap-88084-Image Export-24.tif	1	TRUE	647.624
DL238	DL238	4	d11	../DL238_d11_r4/Snap-88111-Image Export-51.tif	0	TRUE	407.944
DL238	DL238	4	d11	../DL238_d11_r4/Snap-88123-Image Export-63.tif	0	TRUE	630.661
DL238	DL238	4	d11	../DL238_d11_r4/Snap-88068-Image Export-08.tif	1	TRUE	730.367
DL238	DL238	4	d11	../DL238_d11_r4/Snap-88110-Image Export-50.tif	0	TRUE	562.368
DL238	DL238	4	d11	../DL238_d11_r4/Snap-88110-Image Export-50.tif	1	TRUE	687.981
DL238	DL238	4	d11	../DL238_d11_r4/Snap-88069-Image Export-09.tif	0	TRUE	611.322
DL238	DL238	4	d11	../DL238_d11_r4/Snap-88104-Image Export-44.tif	0	TRUE	595.381
DL238	DL238	4	d11	../DL238_d11_r4/Snap-88091-Image Export-31.tif	0	TRUE	629.427
DL238	DL238	4	d11	../DL238_d11_r4/Snap-88091-Image Export-31.tif	1	TRUE	359.292
DL238	DL238	4	d11	../DL238_d11_r4/Snap-88107-Image Export-47.tif	0	TRUE	658.339
DL238	DL238	4	d11	../DL238_d11_r4/Snap-88092-Image Export-32.tif	0	TRUE	618.602
DL238	DL238	4	d11	../DL238_d11_r4/Snap-88106-Image Export-46.tif	0	TRUE	410.282
DL238	DL238	4	d11	../DL238_d11_r4/Snap-88093-Image Export-33.tif	0	TRUE	669.52
DL238	DL238	4	d11	../DL238_d11_r4/Snap-88094-Image Export-34.tif	0	TRUE	454.257
DL238	DL238	4	d11	../DL238_d11_r4/Snap-88101-Image Export-41.tif	0	TRUE	673.868
DL238	DL238	4	d11	../DL238_d11_r4/Snap-88078-Image Export-18.tif	0	TRUE	650.427
DL238	DL238	4	d11	../DL238_d11_r4/Snap-88095-Image Export-35.tif	0	TRUE	623.252
DL238	DL238	4	d11	../DL238_d11_r4/Snap-88079-Image Export-19.tif	0	TRUE	650.227
DL238	DL238	4	d11	../DL238_d11_r4/Snap-88096-Image Export-36.tif	0	TRUE	667.492
DL238	DL238	4	d11	../DL238_d11_r4/Snap-88096-Image Export-36.tif	1	TRUE	607.814
DL238	DL238	4	d11	../DL238_d11_r4/Snap-88103-Image Export-43.tif	0	TRUE	675.586
DL238	DL238	4	d11	../DL238_d11_r4/Snap-88097-Image Export-37.tif	0	TRUE	507.075
DL238	DL238	4	d11	../DL238_d11_r4/Snap-88097-Image Export-37.tif	2	TRUE	615.579
DL238	DL238	4	d11	../DL238_d11_r4/Snap-88102-Image Export-42.tif	0	TRUE	379.982
DL238	DL238	4	d11	../DL238_d11_r4/Snap-88119-Image Export-59.tif	0	TRUE	659.864
DL238	DL238	4	d11	../DL238_d11_r4/Snap-88065-Image Export-05.tif	0	TRUE	588.229
DL238	DL238	4	d11	../DL238_d11_r4/Snap-88089-Image Export-29.tif	0	TRUE	484.494
DL238	DL238	4	d11	../DL238_d11_r4/Snap-88064-Image Export-04.tif	0	TRUE	642.097
DL238	DL238	4	d11	../DL238_d11_r4/Snap-88088-Image Export-28.tif	0	TRUE	662.267
DL238	DL238	4	d11	../DL238_d11_r4/Snap-88108-Image Export-48.tif	0	TRUE	664.166
DL238	DL238	4	d11	../DL238_d11_r4/Snap-88108-Image Export-48.tif	1	TRUE	658.54
DL238	DL238	4	d11	../DL238_d11_r4/Snap-88071-Image Export-11.tif	0	TRUE	604.663
DL238	DL238	4	d11	../DL238_d11_r4/Snap-88109-Image Export-49.tif	2	TRUE	686.173
DL238	DL238	4	d11	../DL238_d11_r4/Snap-88070-Image Export-10.tif	1	TRUE	573.923
DL238	DL238	4	d11	../DL238_d11_r4/Snap-88072-Image Export-12.tif	0	TRUE	642.498
DL238	DL238	4	d11	../DL238_d11_r4/Snap-88075-Image Export-15.tif	0	TRUE	619.386
DL238	DL238	4	d11	../DL238_d11_r4/Snap-88099-Image Export-39.tif	0	TRUE	629.912
DL238	DL238	4	d11	../DL238_d11_r4/Snap-88074-Image Export-14.tif	0	TRUE	676.554
DL238	DL238	4	d11	../DL238_d11_r4/Snap-88074-Image Export-14.tif	1	TRUE	563.491
DL238	DL238	4	d11	../DL238_d11_r4/Snap-88077-Image Export-17.tif	0	TRUE	631.875
DL238	DL238	4	d11	../DL238_d11_r4/Snap-88076-Image Export-16.tif	0	TRUE	560.468
DL238	DL238	4	d11	../DL238_d11_r4/Snap-88076-Image Export-16.tif	1	TRUE	607.595
LRB410	LRB410/411	4	d11	../LRB410_d11_r4/Snap-88130-Image Export-05.tif	0	TRUE	480.082
LRB410	LRB410/411	4	d11	../LRB410_d11_r4/Snap-88148-Image Export-23.tif	0	TRUE	519.142
LRB410	LRB410/411	4	d11	../LRB410_d11_r4/Snap-88148-Image Export-23.tif	1	TRUE	553.544
LRB410	LRB410/411	4	d11	../LRB410_d11_r4/Snap-88148-Image Export-23.tif	2	TRUE	451.37
LRB410	LRB410/411	4	d11	../LRB410_d11_r4/Snap-88137-Image Export-12.tif	0	TRUE	615.734
LRB410	LRB410/411	4	d11	../LRB410_d11_r4/Snap-88137-Image Export-12.tif	1	TRUE	622.613
LRB410	LRB410/411	4	d11	../LRB410_d11_r4/Snap-88151-Image Export-26.tif	0	TRUE	607.97
LRB410	LRB410/411	4	d11	../LRB410_d11_r4/Snap-88128-Image Export-03.tif	0	TRUE	519.891
LRB410	LRB410/411	4	d11	../LRB410_d11_r4/Snap-88136-Image Export-11.tif	0	TRUE	596.459
LRB410	LRB410/411	4	d11	../LRB410_d11_r4/Snap-88150-Image Export-25.tif	0	TRUE	587.397
LRB410	LRB410/411	4	d11	../LRB410_d11_r4/Snap-88138-Image Export-13.tif	1	TRUE	483.809
LRB410	LRB410/411	4	d11	../LRB410_d11_r4/Snap-88126-Image Export-01.tif	0	TRUE	493.291
LRB410	LRB410/411	4	d11	../LRB410_d11_r4/Snap-88167-Image Export-42.tif	0	TRUE	531.556
LRB410	LRB410/411	4	d11	../LRB410_d11_r4/Snap-88166-Image Export-41.tif	0	TRUE	460.122
LRB410	LRB410/411	4	d11	../LRB410_d11_r4/Snap-88140-Image Export-15.tif	0	TRUE	635.867
LRB410	LRB410/411	4	d11	../LRB410_d11_r4/Snap-88140-Image Export-15.tif	1	TRUE	449.051
LRB410	LRB410/411	4	d11	../LRB410_d11_r4/Snap-88134-Image Export-09.tif	0	TRUE	629.408
LRB410	LRB410/411	4	d11	../LRB410_d11_r4/Snap-88153-Image Export-28.tif	0	TRUE	401.595
LRB410	LRB410/411	4	d11	../LRB410_d11_r4/Snap-88154-Image Export-29.tif	0	TRUE	560.377
LRB410	LRB410/411	4	d11	../LRB410_d11_r4/Snap-88161-Image Export-36.tif	0	TRUE	681.841
LRB411	LRB410/411	4	d11	../LRB411_d11_r4/Snap-88216-Image Export-48.tif	0	TRUE	279.307
LRB411	LRB410/411	4	d11	../LRB411_d11_r4/Snap-88181-Image Export-13.tif	0	TRUE	510.272
LRB411	LRB410/411	4	d11	../LRB411_d11_r4/Snap-88181-Image Export-13.tif	1	TRUE	484.932
LRB411	LRB410/411	4	d11	../LRB411_d11_r4/Snap-88182-Image Export-14.tif	0	TRUE	496.598
LRB411	LRB410/411	4	d11	../LRB411_d11_r4/Snap-88206-Image Export-38.tif	0	TRUE	306.565
LRB411	LRB410/411	4	d11	../LRB411_d11_r4/Snap-88170-Image Export-02.tif	0	TRUE	681.696
LRB411	LRB410/411	4	d11	../LRB411_d11_r4/Snap-88224-Image Export-56.tif	0	TRUE	621.663
LRB411	LRB410/411	4	d11	../LRB411_d11_r4/Snap-88199-Image Export-31.tif	0	TRUE	601.904
LRB411	LRB410/411	4	d11	../LRB411_d11_r4/Snap-88226-Image Export-58.tif	1	TRUE	731.801
LRB411	LRB410/411	4	d11	../LRB411_d11_r4/Snap-88213-Image Export-45.tif	1	TRUE	569.75
LRB411	LRB410/411	4	d11	../LRB411_d11_r4/Snap-88176-Image Export-08.tif	0	TRUE	233.898
LRB411	LRB410/411	4	d11	../LRB411_d11_r4/Snap-88214-Image Export-46.tif	0	TRUE	520.924
LRB411	LRB410/411	4	d11	../LRB411_d11_r4/Snap-88186-Image Export-18.tif	0	TRUE	463.036
LRB411	LRB410/411	4	d11	../LRB411_d11_r4/Snap-88192-Image Export-24.tif	0	TRUE	617.232
LRB411	LRB410/411	4	d11	../LRB411_d11_r4/Snap-88189-Image Export-21.tif	0	TRUE	310.402
LRB411	LRB410/411	4	d11	../LRB411_d11_r4/Snap-88189-Image Export-21.tif	1	TRUE	415.708
LRB411	LRB410/411	4	d11	../LRB411_d11_r4/Snap-88194-Image Export-26.tif	0	TRUE	582.3
LRB411	LRB410/411	4	d11	../LRB411_d11_r4/Snap-88190-Image Export-22.tif	0	TRUE	633.355
N2	N2	7	d1	../N2_d1_r7/Snap-92882-Image Export-49.tif	0	TRUE	837.469
N2	N2	7	d1	../N2_d1_r7/Snap-92882-Image Export-49.tif	1	TRUE	833.363
N2	N2	7	d1	../N2_d1_r7/Snap-92851-Image Export-18.tif	0	TRUE	832.198
N2	N2	7	d1	../N2_d1_r7/Snap-92851-Image Export-18.tif	1	TRUE	784.609
N2	N2	7	d1	../N2_d1_r7/Snap-92851-Image Export-18.tif	3	TRUE	846.754
N2	N2	7	d1	../N2_d1_r7/Snap-92837-Image Export-04.tif	0	TRUE	853.856
N2	N2	7	d1	../N2_d1_r7/Snap-92837-Image Export-04.tif	1	TRUE	865.914
N2	N2	7	d1	../N2_d1_r7/Snap-92861-Image Export-28.tif	1	TRUE	838.764
N2	N2	7	d1	../N2_d1_r7/Snap-92861-Image Export-28.tif	3	TRUE	855.242
N2	N2	7	d1	../N2_d1_r7/Snap-92861-Image Export-28.tif	4	TRUE	811.039
N2	N2	7	d1	../N2_d1_r7/Snap-92861-Image Export-28.tif	5	TRUE	758.348
N2	N2	7	d1	../N2_d1_r7/Snap-92861-Image Export-28.tif	6	TRUE	851.933
N2	N2	7	d1	../N2_d1_r7/Snap-92861-Image Export-28.tif	7	TRUE	770.406
N2	N2	7	d1	../N2_d1_r7/Snap-92855-Image Export-22.tif	0	TRUE	753.613
N2	N2	7	d1	../N2_d1_r7/Snap-92855-Image Export-22.tif	2	TRUE	858.146
N2	N2	7	d1	../N2_d1_r7/Snap-92855-Image Export-22.tif	3	TRUE	843.942
N2	N2	7	d1	../N2_d1_r7/Snap-92855-Image Export-22.tif	4	TRUE	854.836
N2	N2	7	d1	../N2_d1_r7/Snap-92855-Image Export-22.tif	5	TRUE	790.715
N2	N2	7	d1	../N2_d1_r7/Snap-92881-Image Export-48.tif	0	TRUE	740.483
N2	N2	7	d1	../N2_d1_r7/Snap-92881-Image Export-48.tif	1	TRUE	775.585
N2	N2	7	d1	../N2_d1_r7/Snap-92881-Image Export-48.tif	3	TRUE	838.542
N2	N2	7	d1	../N2_d1_r7/Snap-92852-Image Export-19.tif	0	TRUE	793.58
N2	N2	7	d1	../N2_d1_r7/Snap-92852-Image Export-19.tif	1	TRUE	835.952
N2	N2	7	d1	../N2_d1_r7/Snap-92852-Image Export-19.tif	2	TRUE	842.778
N2	N2	7	d1	../N2_d1_r7/Snap-92852-Image Export-19.tif	3	TRUE	814.517
N2	N2	7	d1	../N2_d1_r7/Snap-92854-Image Export-21.tif	0	TRUE	832.29
N2	N2	7	d1	../N2_d1_r7/Snap-92854-Image Export-21.tif	1	TRUE	818.493
N2	N2	7	d1	../N2_d1_r7/Snap-92854-Image Export-21.tif	3	TRUE	815.053
N2	N2	7	d1	../N2_d1_r7/Snap-92854-Image Export-21.tif	4	TRUE	845.996
N2	N2	7	d1	../N2_d1_r7/Snap-92854-Image Export-21.tif	5	TRUE	867.653
N2	N2	7	d1	../N2_d1_r7/Snap-92854-Image Export-21.tif	6	TRUE	822.599
N2	N2	7	d1	../N2_d1_r7/Snap-92854-Image Export-21.tif	7	TRUE	712
N2	N2	7	d1	../N2_d1_r7/Snap-92854-Image Export-21.tif	8	TRUE	813.314
N2	N2	7	d1	../N2_d1_r7/Snap-92862-Image Export-29.tif	0	TRUE	807.155
N2	N2	7	d1	../N2_d1_r7/Snap-92862-Image Export-29.tif	2	TRUE	769.241
N2	N2	7	d1	../N2_d1_r7/Snap-92862-Image Export-29.tif	4	TRUE	821.397
N2	N2	7	d1	../N2_d1_r7/Snap-92862-Image Export-29.tif	5	TRUE	809.875
N2	N2	7	d1	../N2_d1_r7/Snap-92856-Image Export-23.tif	1	TRUE	735.174
N2	N2	7	d1	../N2_d1_r7/Snap-92856-Image Export-23.tif	4	TRUE	813
N2	N2	7	d1	../N2_d1_r7/Snap-92856-Image Export-23.tif	5	TRUE	856.093
N2	N2	7	d1	../N2_d1_r7/Snap-92856-Image Export-23.tif	6	TRUE	874.126
N2	N2	7	d1	../N2_d1_r7/Snap-92836-Image Export-03.tif	1	TRUE	857.203
N2	N2	7	d1	../N2_d1_r7/Snap-92834-Image Export-01.tif	1	TRUE	802.199
N2	N2	7	d1	../N2_d1_r7/Snap-92834-Image Export-01.tif	2	TRUE	849.565
N2	N2	7	d1	../N2_d1_r7/Snap-92853-Image Export-20.tif	0	TRUE	815.812
N2	N2	7	d1	../N2_d1_r7/Snap-92853-Image Export-20.tif	1	TRUE	771.923
N2	N2	7	d1	../N2_d1_r7/Snap-92853-Image Export-20.tif	2	TRUE	842.204
N2	N2	7	d1	../N2_d1_r7/Snap-92853-Image Export-20.tif	3	TRUE	814.831
N2	N2	7	d1	../N2_d1_r7/Snap-92853-Image Export-20.tif	5	TRUE	823.044
N2	N2	7	d1	../N2_d1_r7/Snap-92835-Image Export-02.tif	0	TRUE	851.58
N2	N2	7	d1	../N2_d1_r7/Snap-92857-Image Export-24.tif	3	TRUE	779.247
N2	N2	7	d1	../N2_d1_r7/Snap-92857-Image Export-24.tif	4	TRUE	823.672
N2	N2	7	d1	../N2_d1_r7/Snap-92857-Image Export-24.tif	5	TRUE	866.672
N2	N2	7	d1	../N2_d1_r7/Snap-92857-Image Export-24.tif	7	TRUE	825.189
N2	N2	7	d1	../N2_d1_r7/Snap-92857-Image Export-24.tif	8	TRUE	708.744
N2	N2	7	d1	../N2_d1_r7/Snap-92859-Image Export-26.tif	5	TRUE	845.865
N2	N2	7	d1	../N2_d1_r7/Snap-92859-Image Export-26.tif	6	TRUE	877.344
N2	N2	7	d1	../N2_d1_r7/Snap-92858-Image Export-25.tif	0	TRUE	811.261
N2	N2	7	d1	../N2_d1_r7/Snap-92858-Image Export-25.tif	1	TRUE	805.991
N2	N2	7	d1	../N2_d1_r7/Snap-92858-Image Export-25.tif	2	TRUE	811.039
N2	N2	7	d1	../N2_d1_r7/Snap-92858-Image Export-25.tif	3	TRUE	794.653
N2	N2	7	d1	../N2_d1_r7/Snap-92858-Image Export-25.tif	4	TRUE	817.16
N2	N2	7	d1	../N2_d1_r7/Snap-92858-Image Export-25.tif	6	TRUE	851.895
N2	N2	7	d1	../N2_d1_r7/Snap-92838-Image Export-05.tif	0	TRUE	844.349
N2	N2	7	d1	../N2_d1_r7/Snap-92838-Image Export-05.tif	1	TRUE	879.083
N2	N2	7	d1	../N2_d1_r7/Snap-92838-Image Export-05.tif	2	TRUE	825.503
N2	N2	7	d1	../N2_d1_r7/Snap-92871-Image Export-38.tif	2	TRUE	825.725
N2	N2	7	d1	../N2_d1_r7/Snap-92871-Image Export-38.tif	3	TRUE	792.508
N2	N2	7	d1	../N2_d1_r7/Snap-92871-Image Export-38.tif	5	TRUE	801.256
N2	N2	7	d1	../N2_d1_r7/Snap-92871-Image Export-38.tif	6	TRUE	801.126
N2	N2	7	d1	../N2_d1_r7/Snap-92871-Image Export-38.tif	8	TRUE	826.131
N2	N2	7	d1	../N2_d1_r7/Snap-92841-Image Export-08.tif	1	TRUE	792.914
N2	N2	7	d1	../N2_d1_r7/Snap-92841-Image Export-08.tif	2	TRUE	862.696
N2	N2	7	d1	../N2_d1_r7/Snap-92841-Image Export-08.tif	4	TRUE	830.237
N2	N2	7	d1	../N2_d1_r7/Snap-92872-Image Export-39.tif	0	TRUE	744.773
N2	N2	7	d1	../N2_d1_r7/Snap-92872-Image Export-39.tif	2	TRUE	827.962
N2	N2	7	d1	../N2_d1_r7/Snap-92872-Image Export-39.tif	6	TRUE	828.314
N2	N2	7	d1	../N2_d1_r7/Snap-92842-Image Export-09.tif	1	TRUE	833.715
N2	N2	7	d1	../N2_d1_r7/Snap-92842-Image Export-09.tif	2	TRUE	820.638
N2	N2	7	d1	../N2_d1_r7/Snap-92842-Image Export-09.tif	3	TRUE	821.175
N2	N2	7	d1	../N2_d1_r7/Snap-92839-Image Export-06.tif	1	TRUE	841.131
N2	N2	7	d1	../N2_d1_r7/Snap-92839-Image Export-06.tif	2	TRUE	853.856
N2	N2	7	d1	../N2_d1_r7/Snap-92839-Image Export-06.tif	3	TRUE	887.479
N2	N2	7	d1	../N2_d1_r7/Snap-92839-Image Export-06.tif	4	TRUE	842.832
N2	N2	7	d1	../N2_d1_r7/Snap-92869-Image Export-36.tif	0	TRUE	834.658
N2	N2	7	d1	../N2_d1_r7/Snap-92869-Image Export-36.tif	2	TRUE	830.551
N2	N2	7	d1	../N2_d1_r7/Snap-92869-Image Export-36.tif	5	TRUE	763.082
N2	N2	7	d1	../N2_d1_r7/Snap-92869-Image Export-36.tif	8	TRUE	825.281
N2	N2	7	d1	../N2_d1_r7/Snap-92869-Image Export-36.tif	9	TRUE	874.44
N2	N2	7	d1	../N2_d1_r7/Snap-92840-Image Export-07.tif	0	TRUE	813.314
N2	N2	7	d1	../N2_d1_r7/Snap-92840-Image Export-07.tif	1	TRUE	803.493
N2	N2	7	d1	../N2_d1_r7/Snap-92870-Image Export-37.tif	0	TRUE	848.585
N2	N2	7	d1	../N2_d1_r7/Snap-92870-Image Export-37.tif	2	TRUE	838.856
N2	N2	7	d1	../N2_d1_r7/Snap-92870-Image Export-37.tif	4	TRUE	825.281
N2	N2	7	d1	../N2_d1_r7/Snap-92843-Image Export-10.tif	1	TRUE	832.068
N2	N2	7	d1	../N2_d1_r7/Snap-92843-Image Export-10.tif	2	TRUE	848.271
N2	N2	7	d1	../N2_d1_r7/Snap-92843-Image Export-10.tif	4	TRUE	851.266
N2	N2	7	d1	../N2_d1_r7/Snap-92843-Image Export-10.tif	5	TRUE	855.02
N2	N2	7	d1	../N2_d1_r7/Snap-92843-Image Export-10.tif	6	TRUE	813.092
N2	N2	7	d1	../N2_d1_r7/Snap-92843-Image Export-10.tif	7	TRUE	798
N2	N2	7	d1	../N2_d1_r7/Snap-92868-Image Export-35.tif	0	TRUE	820.546
N2	N2	7	d1	../N2_d1_r7/Snap-92868-Image Export-35.tif	2	TRUE	871.629
N2	N2	7	d1	../N2_d1_r7/Snap-92868-Image Export-35.tif	3	TRUE	847.382
N2	N2	7	d1	../N2_d1_r7/Snap-92847-Image Export-14.tif	0	TRUE	873.59
N2	N2	7	d1	../N2_d1_r7/Snap-92847-Image Export-14.tif	1	TRUE	877.788
N2	N2	7	d1	../N2_d1_r7/Snap-92847-Image Export-14.tif	2	TRUE	873.238
N2	N2	7	d1	../N2_d1_r7/Snap-92847-Image Export-14.tif	5	TRUE	775.271
N2	N2	7	d1	../N2_d1_r7/Snap-92847-Image Export-14.tif	6	TRUE	800.054
N2	N2	7	d1	../N2_d1_r7/Snap-92878-Image Export-45.tif	0	TRUE	842.556
N2	N2	7	d1	../N2_d1_r7/Snap-92845-Image Export-12.tif	2	TRUE	836.711
N2	N2	7	d1	../N2_d1_r7/Snap-92845-Image Export-12.tif	3	TRUE	823.136
N2	N2	7	d1	../N2_d1_r7/Snap-92844-Image Export-11.tif	0	TRUE	796.836
N2	N2	7	d1	../N2_d1_r7/Snap-92844-Image Export-11.tif	2	TRUE	812.464
N2	N2	7	d1	../N2_d1_r7/Snap-92844-Image Export-11.tif	3	TRUE	827.112
N2	N2	7	d1	../N2_d1_r7/Snap-92844-Image Export-11.tif	4	TRUE	832.512
N2	N2	7	d1	../N2_d1_r7/Snap-92844-Image Export-11.tif	5	TRUE	853.541
N2	N2	7	d1	../N2_d1_r7/Snap-92844-Image Export-11.tif	6	TRUE	847.512
N2	N2	7	d1	../N2_d1_r7/Snap-92879-Image Export-46.tif	0	TRUE	895.155
N2	N2	7	d1	../N2_d1_r7/Snap-92879-Image Export-46.tif	1	TRUE	805.454
N2	N2	7	d1	../N2_d1_r7/Snap-92846-Image Export-13.tif	0	TRUE	834.121
N2	N2	7	d1	../N2_d1_r7/Snap-92846-Image Export-13.tif	1	TRUE	857.203
N2	N2	7	d1	../N2_d1_r7/Snap-92877-Image Export-44.tif	0	TRUE	848.455
N2	N2	7	d1	../N2_d1_r7/Snap-92877-Image Export-44.tif	1	TRUE	803.938
N2	N2	7	d1	../N2_d1_r7/Snap-92884-Image Export-51.tif	0	TRUE	828.628
N2	N2	7	d1	../N2_d1_r7/Snap-92884-Image Export-51.tif	1	TRUE	811.484
N2	N2	7	d1	../N2_d1_r7/Snap-92865-Image Export-32.tif	0	TRUE	867.875
N2	N2	7	d1	../N2_d1_r7/Snap-92865-Image Export-32.tif	1	TRUE	806.213
N2	N2	7	d1	../N2_d1_r7/Snap-92865-Image Export-32.tif	4	TRUE	857.74
N2	N2	7	d1	../N2_d1_r7/Snap-92885-Image Export-52.tif	0	TRUE	816.348
N2	N2	7	d1	../N2_d1_r7/Snap-92885-Image Export-52.tif	1	TRUE	831.754
N2	N2	7	d1	../N2_d1_r7/Snap-92864-Image Export-31.tif	0	TRUE	736.913
N2	N2	7	d1	../N2_d1_r7/Snap-92864-Image Export-31.tif	1	TRUE	809.024
N2	N2	7	d1	../N2_d1_r7/Snap-92864-Image Export-31.tif	2	TRUE	898.151
N2	N2	7	d1	../N2_d1_r7/Snap-92864-Image Export-31.tif	3	TRUE	835.952
N2	N2	7	d1	../N2_d1_r7/Snap-92873-Image Export-40.tif	0	TRUE	830.682
N2	N2	7	d1	../N2_d1_r7/Snap-92873-Image Export-40.tif	2	TRUE	816.348
N2	N2	7	d1	../N2_d1_r7/Snap-92873-Image Export-40.tif	3	TRUE	856.981
N2	N2	7	d1	../N2_d1_r7/Snap-92873-Image Export-40.tif	5	TRUE	817.865
N2	N2	7	d1	../N2_d1_r7/Snap-92866-Image Export-33.tif	0	TRUE	849.841
N2	N2	7	d1	../N2_d1_r7/Snap-92866-Image Export-33.tif	1	TRUE	826.575
N2	N2	7	d1	../N2_d1_r7/Snap-92866-Image Export-33.tif	2	TRUE	803.271
N2	N2	7	d1	../N2_d1_r7/Snap-92866-Image Export-33.tif	3	TRUE	826.667
N2	N2	7	d1	../N2_d1_r7/Snap-92860-Image Export-27.tif	0	TRUE	830.237
N2	N2	7	d1	../N2_d1_r7/Snap-92860-Image Export-27.tif	1	TRUE	830.904
N2	N2	7	d1	../N2_d1_r7/Snap-92860-Image Export-27.tif	4	TRUE	850.416
N2	N2	7	d1	../N2_d1_r7/Snap-92860-Image Export-27.tif	5	TRUE	822.377
N2	N2	7	d1	../N2_d1_r7/Snap-92849-Image Export-16.tif	1	TRUE	834.75
N2	N2	7	d1	../N2_d1_r7/Snap-92849-Image Export-16.tif	3	TRUE	794.155
N2	N2	7	d1	../N2_d1_r7/Snap-92849-Image Export-16.tif	4	TRUE	890.919
N2	N2	7	d1	../N2_d1_r7/Snap-92876-Image Export-43.tif	0	TRUE	836.895
N2	N2	7	d1	../N2_d1_r7/Snap-92876-Image Export-43.tif	1	TRUE	827.518
N2	N2	7	d1	../N2_d1_r7/Snap-92850-Image Export-17.tif	0	TRUE	803.531
N2	N2	7	d1	../N2_d1_r7/Snap-92850-Image Export-17.tif	1	TRUE	854.614
N2	N2	7	d1	../N2_d1_r7/Snap-92874-Image Export-41.tif	0	TRUE	812.686
N2	N2	7	d1	../N2_d1_r7/Snap-92874-Image Export-41.tif	1	TRUE	833.011
N2	N2	7	d1	../N2_d1_r7/Snap-92874-Image Export-41.tif	2	TRUE	777.102
N2	N2	7	d1	../N2_d1_r7/Snap-92863-Image Export-30.tif	0	TRUE	841.889
N2	N2	7	d1	../N2_d1_r7/Snap-92863-Image Export-30.tif	1	TRUE	802.551
N2	N2	7	d1	../N2_d1_r7/Snap-92863-Image Export-30.tif	2	TRUE	936.953
N2	N2	7	d1	../N2_d1_r7/Snap-92875-Image Export-42.tif	0	TRUE	836.581
N2	N2	7	d1	../N2_d1_r7/Snap-92875-Image Export-42.tif	1	TRUE	804.252
N2	N2	7	d1	../N2_d1_r7/Snap-92883-Image Export-50.tif	0	TRUE	818.049
N2	N2	7	d1	../N2_d1_r7/Snap-92883-Image Export-50.tif	1	TRUE	858.276
N2	N2	7	d1	../N2_d1_r7/Snap-92883-Image Export-50.tif	3	TRUE	794.653
N2	N2	7	d1	../N2_d1_r7/Snap-92848-Image Export-15.tif	0	TRUE	839.744
N2	N2	7	d1	../N2_d1_r7/Snap-92848-Image Export-15.tif	1	TRUE	824.078
N2	N2	7	d1	../N2_d1_r7/Snap-92848-Image Export-15.tif	2	TRUE	827.87
N2	N2	7	d1	../N2_d1_r7/Snap-92848-Image Export-15.tif	4	TRUE	845.957
N2	N2	7	d1	../N2_d1_r7/Snap-92880-Image Export-47.tif	0	TRUE	800.72
N2	N2	7	d1	../N2_d1_r7/Snap-92880-Image Export-47.tif	2	TRUE	814.203
N2	N2	7	d1	../N2_d1_r7/Snap-92867-Image Export-34.tif	0	TRUE	828.498
N2	N2	7	d1	../N2_d1_r7/Snap-92867-Image Export-34.tif	1	TRUE	805.769
N2	N2	7	d1	../N2_d1_r7/Snap-92867-Image Export-34.tif	3	TRUE	859.44
N2	N2	7	d1	../N2_d1_r7/Snap-92867-Image Export-34.tif	5	TRUE	881.764
N2	N2	7	d1	../N2_d1_r7/Snap-92867-Image Export-34.tif	6	TRUE	808.358
DL238	DL238	7	d1	../DL238_d1_r7/Snap-92888-Image Export-03.tif	0	TRUE	759.198
DL238	DL238	7	d1	../DL238_d1_r7/Snap-92888-Image Export-03.tif	1	TRUE	809.116
DL238	DL238	7	d1	../DL238_d1_r7/Snap-92888-Image Export-03.tif	2	TRUE	793.45
DL238	DL238	7	d1	../DL238_d1_r7/Snap-92922-Image Export-37.tif	0	TRUE	773.846
DL238	DL238	7	d1	../DL238_d1_r7/Snap-92922-Image Export-37.tif	1	TRUE	783.261
DL238	DL238	7	d1	../DL238_d1_r7/Snap-92922-Image Export-37.tif	2	TRUE	797.28
DL238	DL238	7	d1	../DL238_d1_r7/Snap-92922-Image Export-37.tif	3	TRUE	821.527
DL238	DL238	7	d1	../DL238_d1_r7/Snap-92922-Image Export-37.tif	4	TRUE	851.488
DL238	DL238	7	d1	../DL238_d1_r7/Snap-92922-Image Export-37.tif	5	TRUE	771.923
DL238	DL238	7	d1	../DL238_d1_r7/Snap-92895-Image Export-10.tif	0	TRUE	821.527
DL238	DL238	7	d1	../DL238_d1_r7/Snap-92920-Image Export-35.tif	3	TRUE	830.367
DL238	DL238	7	d1	../DL238_d1_r7/Snap-92920-Image Export-35.tif	8	TRUE	825.595
DL238	DL238	7	d1	../DL238_d1_r7/Snap-92920-Image Export-35.tif	10	TRUE	803.309
DL238	DL238	7	d1	../DL238_d1_r7/Snap-92920-Image Export-35.tif	11	TRUE	794.875
DL238	DL238	7	d1	../DL238_d1_r7/Snap-92920-Image Export-35.tif	12	TRUE	801.034
DL238	DL238	7	d1	../DL238_d1_r7/Snap-92897-Image Export-12.tif	0	TRUE	729.014
DL238	DL238	7	d1	../DL238_d1_r7/Snap-92897-Image Export-12.tif	1	TRUE	802.643
DL238	DL238	7	d1	../DL238_d1_r7/Snap-92914-Image Export-29.tif	0	TRUE	825.725
DL238	DL238	7	d1	../DL238_d1_r7/Snap-92914-Image Export-29.tif	1	TRUE	633.507
DL238	DL238	7	d1	../DL238_d1_r7/Snap-92914-Image Export-29.tif	2	TRUE	820.102
DL238	DL238	7	d1	../DL238_d1_r7/Snap-92914-Image Export-29.tif	3	TRUE	766.652
DL238	DL238	7	d1	../DL238_d1_r7/Snap-92921-Image Export-36.tif	0	TRUE	833.807
DL238	DL238	7	d1	../DL238_d1_r7/Snap-92921-Image Export-36.tif	2	TRUE	775.179
DL238	DL238	7	d1	../DL238_d1_r7/Snap-92921-Image Export-36.tif	3	TRUE	746.251
DL238	DL238	7	d1	../DL238_d1_r7/Snap-92921-Image Export-36.tif	4	TRUE	855.372
DL238	DL238	7	d1	../DL238_d1_r7/Snap-92921-Image Export-36.tif	6	TRUE	781.43
DL238	DL238	7	d1	../DL238_d1_r7/Snap-92896-Image Export-11.tif	0	TRUE	863.639
DL238	DL238	7	d1	../DL238_d1_r7/Snap-92896-Image Export-11.tif	1	TRUE	433.114
DL238	DL238	7	d1	../DL238_d1_r7/Snap-92896-Image Export-11.tif	2	TRUE	798.537
DL238	DL238	7	d1	../DL238_d1_r7/Snap-92928-Image Export-43.tif	0	TRUE	775.585
DL238	DL238	7	d1	../DL238_d1_r7/Snap-92928-Image Export-43.tif	1	TRUE	842.61
DL238	DL238	7	d1	../DL238_d1_r7/Snap-92928-Image Export-43.tif	3	TRUE	703.473
DL238	DL238	7	d1	../DL238_d1_r7/Snap-92889-Image Export-04.tif	0	TRUE	839.836
DL238	DL238	7	d1	../DL238_d1_r7/Snap-92889-Image Export-04.tif	1	TRUE	739.464
DL238	DL238	7	d1	../DL238_d1_r7/Snap-92892-Image Export-07.tif	0	TRUE	803.938
DL238	DL238	7	d1	../DL238_d1_r7/Snap-92892-Image Export-07.tif	1	TRUE	792.86
DL238	DL238	7	d1	../DL238_d1_r7/Snap-92931-Image Export-46.tif	2	TRUE	808.228
DL238	DL238	7	d1	../DL238_d1_r7/Snap-92931-Image Export-46.tif	3	TRUE	776.343
DL238	DL238	7	d1	../DL238_d1_r7/Snap-92890-Image Export-05.tif	0	TRUE	835.416
DL238	DL238	7	d1	../DL238_d1_r7/Snap-92890-Image Export-05.tif	1	TRUE	814.387
DL238	DL238	7	d1	../DL238_d1_r7/Snap-92913-Image Export-28.tif	0	TRUE	833.455
DL238	DL238	7	d1	../DL238_d1_r7/Snap-92913-Image Export-28.tif	1	TRUE	833.899
DL238	DL238	7	d1	../DL238_d1_r7/Snap-92913-Image Export-28.tif	2	TRUE	810.947
DL238	DL238	7	d1	../DL238_d1_r7/Snap-92913-Image Export-28.tif	3	TRUE	773.218
DL238	DL238	7	d1	../DL238_d1_r7/Snap-92913-Image Export-28.tif	6	TRUE	816.034
DL238	DL238	7	d1	../DL238_d1_r7/Snap-92913-Image Export-28.tif	8	TRUE	781.522
DL238	DL238	7	d1	../DL238_d1_r7/Snap-92930-Image Export-45.tif	0	TRUE	746.474
DL238	DL238	7	d1	../DL238_d1_r7/Snap-92930-Image Export-45.tif	1	TRUE	800.904
DL238	DL238	7	d1	../DL238_d1_r7/Snap-92930-Image Export-45.tif	2	TRUE	724.464
DL238	DL238	7	d1	../DL238_d1_r7/Snap-92930-Image Export-45.tif	3	TRUE	787.681
DL238	DL238	7	d1	../DL238_d1_r7/Snap-92891-Image Export-06.tif	0	TRUE	761.788
DL238	DL238	7	d1	../DL238_d1_r7/Snap-92929-Image Export-44.tif	1	TRUE	797.15
DL238	DL238	7	d1	../DL238_d1_r7/Snap-92929-Image Export-44.tif	2	TRUE	287.374
DL238	DL238	7	d1	../DL238_d1_r7/Snap-92929-Image Export-44.tif	3	TRUE	812.372
DL238	DL238	7	d1	../DL238_d1_r7/Snap-92932-Image Export-47.tif	0	TRUE	817.068
DL238	DL238	7	d1	../DL238_d1_r7/Snap-92932-Image Export-47.tif	1	TRUE	809.653
DL238	DL238	7	d1	../DL238_d1_r7/Snap-92899-Image Export-14.tif	0	TRUE	840.15
DL238	DL238	7	d1	../DL238_d1_r7/Snap-92899-Image Export-14.tif	2	TRUE	760.845
DL238	DL238	7	d1	../DL238_d1_r7/Snap-92902-Image Export-17.tif	1	TRUE	749.415
DL238	DL238	7	d1	../DL238_d1_r7/Snap-92902-Image Export-17.tif	2	TRUE	773.126
DL238	DL238	7	d1	../DL238_d1_r7/Snap-92926-Image Export-41.tif	0	TRUE	738.836
DL238	DL238	7	d1	../DL238_d1_r7/Snap-92926-Image Export-41.tif	1	TRUE	749.155
DL238	DL238	7	d1	../DL238_d1_r7/Snap-92887-Image Export-02.tif	0	TRUE	837.875
DL238	DL238	7	d1	../DL238_d1_r7/Snap-92887-Image Export-02.tif	1	TRUE	794.653
DL238	DL238	7	d1	../DL238_d1_r7/Snap-92898-Image Export-13.tif	0	TRUE	828.406
DL238	DL238	7	d1	../DL238_d1_r7/Snap-92898-Image Export-13.tif	1	TRUE	798.981
DL238	DL238	7	d1	../DL238_d1_r7/Snap-92900-Image Export-15.tif	0	TRUE	835.416
DL238	DL238	7	d1	../DL238_d1_r7/Snap-92900-Image Export-15.tif	1	TRUE	850.286
DL238	DL238	7	d1	../DL238_d1_r7/Snap-92925-Image Export-40.tif	5	TRUE	824.3
DL238	DL238	7	d1	../DL238_d1_r7/Snap-92925-Image Export-40.tif	6	TRUE	821.933
DL238	DL238	7	d1	../DL238_d1_r7/Snap-92925-Image Export-40.tif	9	TRUE	816.218
DL238	DL238	7	d1	../DL238_d1_r7/Snap-92925-Image Export-40.tif	10	TRUE	851.396
DL238	DL238	7	d1	../DL238_d1_r7/Snap-92925-Image Export-40.tif	11	TRUE	808.266
DL238	DL238	7	d1	../DL238_d1_r7/Snap-92901-Image Export-16.tif	0	TRUE	839.3
DL238	DL238	7	d1	../DL238_d1_r7/Snap-92901-Image Export-16.tif	1	TRUE	814.923
DL238	DL238	7	d1	../DL238_d1_r7/Snap-92927-Image Export-42.tif	0	TRUE	814.517
DL238	DL238	7	d1	../DL238_d1_r7/Snap-92927-Image Export-42.tif	1	TRUE	808.856
DL238	DL238	7	d1	../DL238_d1_r7/Snap-92927-Image Export-42.tif	2	TRUE	836.082
DL238	DL238	7	d1	../DL238_d1_r7/Snap-92927-Image Export-42.tif	3	TRUE	824.024
DL238	DL238	7	d1	../DL238_d1_r7/Snap-92886-Image Export-01.tif	1	TRUE	785.092
DL238	DL238	7	d1	../DL238_d1_r7/Snap-92886-Image Export-01.tif	2	TRUE	829.387
DL238	DL238	7	d1	../DL238_d1_r7/Snap-92907-Image Export-22.tif	0	TRUE	790.677
DL238	DL238	7	d1	../DL238_d1_r7/Snap-92907-Image Export-22.tif	2	TRUE	793.802
DL238	DL238	7	d1	../DL238_d1_r7/Snap-92907-Image Export-22.tif	3	TRUE	809.875
DL238	DL238	7	d1	../DL238_d1_r7/Snap-92907-Image Export-22.tif	5	TRUE	847.788
DL238	DL238	7	d1	../DL238_d1_r7/Snap-92918-Image Export-33.tif	0	TRUE	817.513
DL238	DL238	7	d1	../DL238_d1_r7/Snap-92918-Image Export-33.tif	1	TRUE	840.557
DL238	DL238	7	d1	../DL238_d1_r7/Snap-92918-Image Export-33.tif	4	TRUE	824.744
DL238	DL238	7	d1	../DL238_d1_r7/Snap-92903-Image Export-18.tif	0	TRUE	827.204
DL238	DL238	7	d1	../DL238_d1_r7/Snap-92903-Image Export-18.tif	1	TRUE	772.367
DL238	DL238	7	d1	../DL238_d1_r7/Snap-92903-Image Export-18.tif	4	TRUE	767.411
DL238	DL238	7	d1	../DL238_d1_r7/Snap-92905-Image Export-20.tif	0	TRUE	783.131
DL238	DL238	7	d1	../DL238_d1_r7/Snap-92905-Image Export-20.tif	1	TRUE	801.478
DL238	DL238	7	d1	../DL238_d1_r7/Snap-92905-Image Export-20.tif	2	TRUE	788.217
DL238	DL238	7	d1	../DL238_d1_r7/Snap-92905-Image Export-20.tif	3	TRUE	848.011
DL238	DL238	7	d1	../DL238_d1_r7/Snap-92905-Image Export-20.tif	4	TRUE	828.759
DL238	DL238	7	d1	../DL238_d1_r7/Snap-92906-Image Export-21.tif	1	TRUE	788.976
DL238	DL238	7	d1	../DL238_d1_r7/Snap-92906-Image Export-21.tif	2	TRUE	844.257
DL238	DL238	7	d1	../DL238_d1_r7/Snap-92906-Image Export-21.tif	3	TRUE	844.885
DL238	DL238	7	d1	../DL238_d1_r7/Snap-92906-Image Export-21.tif	4	TRUE	779.65
DL238	DL238	7	d1	../DL238_d1_r7/Snap-92906-Image Export-21.tif	5	TRUE	784.87
DL238	DL238	7	d1	../DL238_d1_r7/Snap-92919-Image Export-34.tif	0	TRUE	776.159
DL238	DL238	7	d1	../DL238_d1_r7/Snap-92919-Image Export-34.tif	1	TRUE	832.382
DL238	DL238	7	d1	../DL238_d1_r7/Snap-92919-Image Export-34.tif	2	TRUE	782.372
DL238	DL238	7	d1	../DL238_d1_r7/Snap-92919-Image Export-34.tif	3	TRUE	761.565
DL238	DL238	7	d1	../DL238_d1_r7/Snap-92919-Image Export-34.tif	4	TRUE	822.063
DL238	DL238	7	d1	../DL238_d1_r7/Snap-92919-Image Export-34.tif	6	TRUE	773.532
DL238	DL238	7	d1	../DL238_d1_r7/Snap-92919-Image Export-34.tif	8	TRUE	788.217
DL238	DL238	7	d1	../DL238_d1_r7/Snap-92919-Image Export-34.tif	12	TRUE	816.126
DL238	DL238	7	d1	../DL238_d1_r7/Snap-92904-Image Export-19.tif	0	TRUE	839.484
DL238	DL238	7	d1	../DL238_d1_r7/Snap-92904-Image Export-19.tif	1	TRUE	792.86
DL238	DL238	7	d1	../DL238_d1_r7/Snap-92904-Image Export-19.tif	2	TRUE	762.99
DL238	DL238	7	d1	../DL238_d1_r7/Snap-92904-Image Export-19.tif	4	TRUE	835.416
DL238	DL238	7	d1	../DL238_d1_r7/Snap-92909-Image Export-24.tif	1	TRUE	813.667
DL238	DL238	7	d1	../DL238_d1_r7/Snap-92909-Image Export-24.tif	3	TRUE	839.208
DL238	DL238	7	d1	../DL238_d1_r7/Snap-92909-Image Export-24.tif	4	TRUE	832.957
DL238	DL238	7	d1	../DL238_d1_r7/Snap-92912-Image Export-27.tif	5	TRUE	826.798
DL238	DL238	7	d1	../DL238_d1_r7/Snap-92912-Image Export-27.tif	6	TRUE	838.672
DL238	DL238	7	d1	../DL238_d1_r7/Snap-92893-Image Export-08.tif	0	TRUE	813.537
DL238	DL238	7	d1	../DL238_d1_r7/Snap-92893-Image Export-08.tif	1	TRUE	803.179
DL238	DL238	7	d1	../DL238_d1_r7/Snap-92910-Image Export-25.tif	0	TRUE	777.638
DL238	DL238	7	d1	../DL238_d1_r7/Snap-92910-Image Export-25.tif	1	TRUE	794.875
DL238	DL238	7	d1	../DL238_d1_r7/Snap-92910-Image Export-25.tif	2	TRUE	736.56
DL238	DL238	7	d1	../DL238_d1_r7/Snap-92910-Image Export-25.tif	3	TRUE	839.3
DL238	DL238	7	d1	../DL238_d1_r7/Snap-92933-Image Export-48.tif	1	TRUE	740.981
DL238	DL238	7	d1	../DL238_d1_r7/Snap-92924-Image Export-39.tif	4	TRUE	797.908
DL238	DL238	7	d1	../DL238_d1_r7/Snap-92924-Image Export-39.tif	7	TRUE	760.715
DL238	DL238	7	d1	../DL238_d1_r7/Snap-92924-Image Export-39.tif	9	TRUE	784.111
DL238	DL238	7	d1	../DL238_d1_r7/Snap-92924-Image Export-39.tif	10	TRUE	832.605
DL238	DL238	7	d1	../DL238_d1_r7/Snap-92911-Image Export-26.tif	2	TRUE	807.507
DL238	DL238	7	d1	../DL238_d1_r7/Snap-92911-Image Export-26.tif	3	TRUE	828.276
DL238	DL238	7	d1	../DL238_d1_r7/Snap-92911-Image Export-26.tif	4	TRUE	858.092
DL238	DL238	7	d1	../DL238_d1_r7/Snap-92911-Image Export-26.tif	6	TRUE	845.865
DL238	DL238	7	d1	../DL238_d1_r7/Snap-92911-Image Export-26.tif	7	TRUE	771.256
DL238	DL238	7	d1	../DL238_d1_r7/Snap-92908-Image Export-23.tif	2	TRUE	691.323
DL238	DL238	7	d1	../DL238_d1_r7/Snap-92908-Image Export-23.tif	4	TRUE	783.261
DL238	DL238	7	d1	../DL238_d1_r7/Snap-92908-Image Export-23.tif	5	TRUE	787.643
DL238	DL238	7	d1	../DL238_d1_r7/Snap-92908-Image Export-23.tif	6	TRUE	849.88
DL238	DL238	7	d1	../DL238_d1_r7/Snap-92915-Image Export-30.tif	1	TRUE	798.092
DL238	DL238	7	d1	../DL238_d1_r7/Snap-92915-Image Export-30.tif	2	TRUE	764.285
DL238	DL238	7	d1	../DL238_d1_r7/Snap-92915-Image Export-30.tif	3	TRUE	631.454
DL238	DL238	7	d1	../DL238_d1_r7/Snap-92915-Image Export-30.tif	5	TRUE	795.005
DL238	DL238	7	d1	../DL238_d1_r7/Snap-92915-Image Export-30.tif	6	TRUE	774.42
DL238	DL238	7	d1	../DL238_d1_r7/Snap-92915-Image Export-30.tif	7	TRUE	819.121
DL238	DL238	7	d1	../DL238_d1_r7/Snap-92923-Image Export-38.tif	2	TRUE	793.174
DL238	DL238	7	d1	../DL238_d1_r7/Snap-92923-Image Export-38.tif	3	TRUE	742.275
DL238	DL238	7	d1	../DL238_d1_r7/Snap-92923-Image Export-38.tif	4	TRUE	826.613
DL238	DL238	7	d1	../DL238_d1_r7/Snap-92923-Image Export-38.tif	5	TRUE	822.913
DL238	DL238	7	d1	../DL238_d1_r7/Snap-92923-Image Export-38.tif	6	TRUE	790.455
DL238	DL238	7	d1	../DL238_d1_r7/Snap-92923-Image Export-38.tif	7	TRUE	846.44
DL238	DL238	7	d1	../DL238_d1_r7/Snap-92934-Image Export-49.tif	1	TRUE	832.605
DL238	DL238	7	d1	../DL238_d1_r7/Snap-92917-Image Export-32.tif	2	TRUE	798.537
DL238	DL238	7	d1	../DL238_d1_r7/Snap-92917-Image Export-32.tif	3	TRUE	828.406
DL238	DL238	7	d1	../DL238_d1_r7/Snap-92917-Image Export-32.tif	4	TRUE	835.286
DL238	DL238	7	d1	../DL238_d1_r7/Snap-92917-Image Export-32.tif	6	TRUE	780.633
DL238	DL238	7	d1	../DL238_d1_r7/Snap-92917-Image Export-32.tif	7	TRUE	818.807
DL238	DL238	7	d1	../DL238_d1_r7/Snap-92917-Image Export-32.tif	8	TRUE	874.256
DL238	DL238	7	d1	../DL238_d1_r7/Snap-92917-Image Export-32.tif	10	TRUE	800.942
DL238	DL238	7	d1	../DL238_d1_r7/Snap-92917-Image Export-32.tif	14	TRUE	813.629
DL238	DL238	7	d1	../DL238_d1_r7/Snap-92917-Image Export-32.tif	16	TRUE	834.435
DL238	DL238	7	d1	../DL238_d1_r7/Snap-92917-Image Export-32.tif	17	TRUE	810.633
DL238	DL238	7	d1	../DL238_d1_r7/Snap-92917-Image Export-32.tif	18	TRUE	797.594
DL238	DL238	7	d1	../DL238_d1_r7/Snap-92894-Image Export-09.tif	0	TRUE	804.604
DL238	DL238	7	d1	../DL238_d1_r7/Snap-92916-Image Export-31.tif	0	TRUE	840.687
DL238	DL238	7	d1	../DL238_d1_r7/Snap-92916-Image Export-31.tif	1	TRUE	832.735
DL238	DL238	7	d1	../DL238_d1_r7/Snap-92916-Image Export-31.tif	3	TRUE	820.952
DL238	DL238	7	d1	../DL238_d1_r7/Snap-92916-Image Export-31.tif	4	TRUE	797.372
DL238	DL238	7	d1	../DL238_d1_r7/Snap-92916-Image Export-31.tif	5	TRUE	832.605
DL238	DL238	7	d1	../DL238_d1_r7/Snap-92916-Image Export-31.tif	6	TRUE	829.073
DL238	DL238	7	d1	../DL238_d1_r7/Snap-92916-Image Export-31.tif	7	TRUE	763.711
LRB410	LRB410/411	7	d1	../LRB410_d1_r7/Snap-92968-Image Export-34.tif	0	TRUE	903.199
LRB410	LRB410/411	7	d1	../LRB410_d1_r7/Snap-92968-Image Export-34.tif	1	TRUE	899.353
LRB410	LRB410/411	7	d1	../LRB410_d1_r7/Snap-92968-Image Export-34.tif	2	TRUE	904.31
LRB410	LRB410/411	7	d1	../LRB410_d1_r7/Snap-92968-Image Export-34.tif	3	TRUE	595.463
LRB410	LRB410/411	7	d1	../LRB410_d1_r7/Snap-92968-Image Export-34.tif	4	TRUE	842.112
LRB410	LRB410/411	7	d1	../LRB410_d1_r7/Snap-92969-Image Export-35.tif	0	TRUE	680.299
LRB410	LRB410/411	7	d1	../LRB410_d1_r7/Snap-92969-Image Export-35.tif	1	TRUE	943.648
LRB410	LRB410/411	7	d1	../LRB410_d1_r7/Snap-92969-Image Export-35.tif	3	TRUE	956.243
LRB410	LRB410/411	7	d1	../LRB410_d1_r7/Snap-92940-Image Export-06.tif	0	TRUE	716.826
LRB410	LRB410/411	7	d1	../LRB410_d1_r7/Snap-92940-Image Export-06.tif	1	TRUE	848.899
LRB410	LRB410/411	7	d1	../LRB410_d1_r7/Snap-92940-Image Export-06.tif	4	TRUE	909.006
LRB410	LRB410/411	7	d1	../LRB410_d1_r7/Snap-92940-Image Export-06.tif	6	TRUE	819.068
LRB410	LRB410/411	7	d1	../LRB410_d1_r7/Snap-92941-Image Export-07.tif	1	TRUE	834.788
LRB410	LRB410/411	7	d1	../LRB410_d1_r7/Snap-92941-Image Export-07.tif	2	TRUE	833.141
LRB410	LRB410/411	7	d1	../LRB410_d1_r7/Snap-92946-Image Export-12.tif	0	TRUE	900.204
LRB410	LRB410/411	7	d1	../LRB410_d1_r7/Snap-92946-Image Export-12.tif	1	TRUE	887.387
LRB410	LRB410/411	7	d1	../LRB410_d1_r7/Snap-92946-Image Export-12.tif	2	TRUE	890.161
LRB410	LRB410/411	7	d1	../LRB410_d1_r7/Snap-92947-Image Export-13.tif	1	TRUE	754.464
LRB410	LRB410/411	7	d1	../LRB410_d1_r7/Snap-92947-Image Export-13.tif	2	TRUE	862.918
LRB410	LRB410/411	7	d1	../LRB410_d1_r7/Snap-92947-Image Export-13.tif	4	TRUE	925.745
LRB410	LRB410/411	7	d1	../LRB410_d1_r7/Snap-92947-Image Export-13.tif	5	TRUE	589.434
LRB410	LRB410/411	7	d1	../LRB410_d1_r7/Snap-92947-Image Export-13.tif	7	TRUE	882.615
LRB410	LRB410/411	7	d1	../LRB410_d1_r7/Snap-92944-Image Export-10.tif	1	TRUE	640.516
LRB410	LRB410/411	7	d1	../LRB410_d1_r7/Snap-92944-Image Export-10.tif	2	TRUE	834.251
LRB410	LRB410/411	7	d1	../LRB410_d1_r7/Snap-92944-Image Export-10.tif	3	TRUE	825.411
LRB410	LRB410/411	7	d1	../LRB410_d1_r7/Snap-92944-Image Export-10.tif	4	TRUE	626.313
LRB410	LRB410/411	7	d1	../LRB410_d1_r7/Snap-92944-Image Export-10.tif	5	TRUE	859.126
LRB410	LRB410/411	7	d1	../LRB410_d1_r7/Snap-92945-Image Export-11.tif	0	TRUE	783.797
LRB410	LRB410/411	7	d1	../LRB410_d1_r7/Snap-92945-Image Export-11.tif	1	TRUE	833.455
LRB410	LRB410/411	7	d1	../LRB410_d1_r7/Snap-92945-Image Export-11.tif	2	TRUE	892.788
LRB410	LRB410/411	7	d1	../LRB410_d1_r7/Snap-92945-Image Export-11.tif	3	TRUE	870.909
LRB410	LRB410/411	7	d1	../LRB410_d1_r7/Snap-92966-Image Export-32.tif	0	TRUE	899.353
LRB410	LRB410/411	7	d1	../LRB410_d1_r7/Snap-92966-Image Export-32.tif	1	TRUE	859.218
LRB410	LRB410/411	7	d1	../LRB410_d1_r7/Snap-92966-Image Export-32.tif	3	TRUE	860.735
LRB410	LRB410/411	7	d1	../LRB410_d1_r7/Snap-92966-Image Export-32.tif	4	TRUE	755.406
LRB410	LRB410/411	7	d1	../LRB410_d1_r7/Snap-92966-Image Export-32.tif	6	TRUE	739.15
LRB410	LRB410/411	7	d1	../LRB410_d1_r7/Snap-92966-Image Export-32.tif	7	TRUE	711.111
LRB410	LRB410/411	7	d1	../LRB410_d1_r7/Snap-92967-Image Export-33.tif	0	TRUE	925.875
LRB410	LRB410/411	7	d1	../LRB410_d1_r7/Snap-92967-Image Export-33.tif	1	TRUE	679.725
LRB410	LRB410/411	7	d1	../LRB410_d1_r7/Snap-92967-Image Export-33.tif	2	TRUE	881.45
LRB410	LRB410/411	7	d1	../LRB410_d1_r7/Snap-92967-Image Export-33.tif	3	TRUE	970.17
LRB410	LRB410/411	7	d1	../LRB410_d1_r7/Snap-92967-Image Export-33.tif	5	TRUE	856.981
LRB410	LRB410/411	7	d1	../LRB410_d1_r7/Snap-92964-Image Export-30.tif	0	TRUE	821.803
LRB410	LRB410/411	7	d1	../LRB410_d1_r7/Snap-92964-Image Export-30.tif	1	TRUE	767.319
LRB410	LRB410/411	7	d1	../LRB410_d1_r7/Snap-92964-Image Export-30.tif	2	TRUE	863.953
LRB410	LRB410/411	7	d1	../LRB410_d1_r7/Snap-92965-Image Export-31.tif	2	TRUE	823.672
LRB410	LRB410/411	7	d1	../LRB410_d1_r7/Snap-92965-Image Export-31.tif	3	TRUE	744.236
LRB410	LRB410/411	7	d1	../LRB410_d1_r7/Snap-92965-Image Export-31.tif	5	TRUE	866.58
LRB410	LRB410/411	7	d1	../LRB410_d1_r7/Snap-92965-Image Export-31.tif	6	TRUE	795.189
LRB410	LRB410/411	7	d1	../LRB410_d1_r7/Snap-92965-Image Export-31.tif	8	TRUE	847.827
LRB410	LRB410/411	7	d1	../LRB410_d1_r7/Snap-92948-Image Export-14.tif	2	TRUE	916.997
LRB410	LRB410/411	7	d1	../LRB410_d1_r7/Snap-92948-Image Export-14.tif	4	TRUE	868.817
LRB410	LRB410/411	7	d1	../LRB410_d1_r7/Snap-92948-Image Export-14.tif	6	TRUE	886.851
LRB410	LRB410/411	7	d1	../LRB410_d1_r7/Snap-92949-Image Export-15.tif	0	TRUE	808.044
LRB410	LRB410/411	7	d1	../LRB410_d1_r7/Snap-92949-Image Export-15.tif	2	TRUE	888.199
LRB410	LRB410/411	7	d1	../LRB410_d1_r7/Snap-92949-Image Export-15.tif	3	TRUE	839.836
LRB410	LRB410/411	7	d1	../LRB410_d1_r7/Snap-92949-Image Export-15.tif	5	TRUE	973.74
LRB410	LRB410/411	7	d1	../LRB410_d1_r7/Snap-92950-Image Export-16.tif	0	TRUE	939.32
LRB410	LRB410/411	7	d1	../LRB410_d1_r7/Snap-92950-Image Export-16.tif	1	TRUE	892.344
LRB410	LRB410/411	7	d1	../LRB410_d1_r7/Snap-92950-Image Export-16.tif	3	TRUE	755.666
LRB410	LRB410/411	7	d1	../LRB410_d1_r7/Snap-92950-Image Export-16.tif	5	TRUE	900.832
LRB410	LRB410/411	7	d1	../LRB410_d1_r7/Snap-92950-Image Export-16.tif	6	TRUE	894.267
LRB410	LRB410/411	7	d1	../LRB410_d1_r7/Snap-92951-Image Export-17.tif	0	TRUE	644.492
LRB410	LRB410/411	7	d1	../LRB410_d1_r7/Snap-92951-Image Export-17.tif	2	TRUE	679.541
LRB410	LRB410/411	7	d1	../LRB410_d1_r7/Snap-92951-Image Export-17.tif	4	TRUE	869.392
LRB410	LRB410/411	7	d1	../LRB410_d1_r7/Snap-92951-Image Export-17.tif	5	TRUE	913.243
LRB410	LRB410/411	7	d1	../LRB410_d1_r7/Snap-92951-Image Export-17.tif	6	TRUE	591.265
LRB410	LRB410/411	7	d1	../LRB410_d1_r7/Snap-92960-Image Export-26.tif	1	TRUE	745.937
LRB410	LRB410/411	7	d1	../LRB410_d1_r7/Snap-92960-Image Export-26.tif	2	TRUE	845.773
LRB410	LRB410/411	7	d1	../LRB410_d1_r7/Snap-92960-Image Export-26.tif	3	TRUE	741.777
LRB410	LRB410/411	7	d1	../LRB410_d1_r7/Snap-92960-Image Export-26.tif	4	TRUE	626.849
LRB410	LRB410/411	7	d1	../LRB410_d1_r7/Snap-92960-Image Export-26.tif	6	TRUE	852.339
LRB410	LRB410/411	7	d1	../LRB410_d1_r7/Snap-92961-Image Export-27.tif	1	TRUE	865.73
LRB410	LRB410/411	7	d1	../LRB410_d1_r7/Snap-92961-Image Export-27.tif	2	TRUE	505.356
LRB410	LRB410/411	7	d1	../LRB410_d1_r7/Snap-92961-Image Export-27.tif	3	TRUE	901.498
LRB410	LRB410/411	7	d1	../LRB410_d1_r7/Snap-92961-Image Export-27.tif	5	TRUE	874.885
LRB410	LRB410/411	7	d1	../LRB410_d1_r7/Snap-92962-Image Export-28.tif	2	TRUE	787.773
LRB410	LRB410/411	7	d1	../LRB410_d1_r7/Snap-92962-Image Export-28.tif	3	TRUE	776.343
LRB410	LRB410/411	7	d1	../LRB410_d1_r7/Snap-92962-Image Export-28.tif	4	TRUE	887.885
LRB410	LRB410/411	7	d1	../LRB410_d1_r7/Snap-92962-Image Export-28.tif	5	TRUE	757.72
LRB410	LRB410/411	7	d1	../LRB410_d1_r7/Snap-92957-Image Export-23.tif	2	TRUE	900.61
LRB410	LRB410/411	7	d1	../LRB410_d1_r7/Snap-92957-Image Export-23.tif	3	TRUE	887.923
LRB410	LRB410/411	7	d1	../LRB410_d1_r7/Snap-92957-Image Export-23.tif	4	TRUE	842.296
LRB410	LRB410/411	7	d1	../LRB410_d1_r7/Snap-92957-Image Export-23.tif	5	TRUE	913.779
LRB410	LRB410/411	7	d1	../LRB410_d1_r7/Snap-92957-Image Export-23.tif	6	TRUE	641.053
LRB410	LRB410/411	7	d1	../LRB410_d1_r7/Snap-92956-Image Export-22.tif	2	TRUE	790.01
LRB410	LRB410/411	7	d1	../LRB410_d1_r7/Snap-92956-Image Export-22.tif	3	TRUE	695.077
LRB410	LRB410/411	7	d1	../LRB410_d1_r7/Snap-92956-Image Export-22.tif	4	TRUE	563.762
LRB410	LRB410/411	7	d1	../LRB410_d1_r7/Snap-92956-Image Export-22.tif	5	TRUE	931.904
LRB410	LRB410/411	7	d1	../LRB410_d1_r7/Snap-92956-Image Export-22.tif	9	TRUE	877.436
LRB410	LRB410/411	7	d1	../LRB410_d1_r7/Snap-92956-Image Export-22.tif	10	TRUE	793.396
LRB410	LRB410/411	7	d1	../LRB410_d1_r7/Snap-92956-Image Export-22.tif	11	TRUE	873.016
LRB410	LRB410/411	7	d1	../LRB410_d1_r7/Snap-92956-Image Export-22.tif	12	TRUE	871.759
LRB410	LRB410/411	7	d1	../LRB410_d1_r7/Snap-92963-Image Export-29.tif	0	TRUE	703.251
LRB410	LRB410/411	7	d1	../LRB410_d1_r7/Snap-92963-Image Export-29.tif	1	TRUE	723.43
LRB410	LRB410/411	7	d1	../LRB410_d1_r7/Snap-92963-Image Export-29.tif	2	TRUE	940.967
LRB410	LRB410/411	7	d1	../LRB410_d1_r7/Snap-92963-Image Export-29.tif	3	TRUE	828.406
LRB410	LRB410/411	7	d1	../LRB410_d1_r7/Snap-92952-Image Export-18.tif	1	TRUE	667.26
LRB410	LRB410/411	7	d1	../LRB410_d1_r7/Snap-92952-Image Export-18.tif	2	TRUE	583.052
LRB410	LRB410/411	7	d1	../LRB410_d1_r7/Snap-92952-Image Export-18.tif	3	TRUE	745.845
LRB410	LRB410/411	7	d1	../LRB410_d1_r7/Snap-92952-Image Export-18.tif	4	TRUE	914.001
LRB410	LRB410/411	7	d1	../LRB410_d1_r7/Snap-92952-Image Export-18.tif	6	TRUE	857.702
LRB410	LRB410/411	7	d1	../LRB410_d1_r7/Snap-92952-Image Export-18.tif	7	TRUE	719.454
LRB410	LRB410/411	7	d1	../LRB410_d1_r7/Snap-92952-Image Export-18.tif	8	TRUE	882.653
LRB410	LRB410/411	7	d1	../LRB410_d1_r7/Snap-92952-Image Export-18.tif	9	TRUE	664.763
LRB410	LRB410/411	7	d1	../LRB410_d1_r7/Snap-92952-Image Export-18.tif	11	TRUE	896.672
LRB410	LRB410/411	7	d1	../LRB410_d1_r7/Snap-92955-Image Export-21.tif	0	TRUE	918.291
LRB410	LRB410/411	7	d1	../LRB410_d1_r7/Snap-92955-Image Export-21.tif	2	TRUE	800.59
LRB410	LRB410/411	7	d1	../LRB410_d1_r7/Snap-92955-Image Export-21.tif	3	TRUE	904.088
LRB410	LRB410/411	7	d1	../LRB410_d1_r7/Snap-92955-Image Export-21.tif	5	TRUE	746.826
LRB410	LRB410/411	7	d1	../LRB410_d1_r7/Snap-92954-Image Export-20.tif	1	TRUE	876.585
LRB410	LRB410/411	7	d1	../LRB410_d1_r7/Snap-92954-Image Export-20.tif	3	TRUE	874.662
LRB410	LRB410/411	7	d1	../LRB410_d1_r7/Snap-92954-Image Export-20.tif	5	TRUE	858.812
LRB410	LRB410/411	7	d1	../LRB410_d1_r7/Snap-92954-Image Export-20.tif	8	TRUE	781.116
LRB410	LRB410/411	7	d1	../LRB410_d1_r7/Snap-92954-Image Export-20.tif	9	TRUE	827.464
LRB410	LRB410/411	7	d1	../LRB410_d1_r7/Snap-92954-Image Export-20.tif	12	TRUE	858.682
LRB410	LRB410/411	7	d1	../LRB410_d1_r7/Snap-92953-Image Export-19.tif	0	TRUE	856.851
LRB410	LRB410/411	7	d1	../LRB410_d1_r7/Snap-92953-Image Export-19.tif	2	TRUE	760.715
LRB410	LRB410/411	7	d1	../LRB410_d1_r7/Snap-92953-Image Export-19.tif	3	TRUE	891.363
LRB410	LRB410/411	7	d1	../LRB410_d1_r7/Snap-92953-Image Export-19.tif	5	TRUE	812.778
LRB410	LRB410/411	7	d1	../LRB410_d1_r7/Snap-92953-Image Export-19.tif	6	TRUE	910.209
LRB410	LRB410/411	7	d1	../LRB410_d1_r7/Snap-92953-Image Export-19.tif	7	TRUE	906.141
LRB410	LRB410/411	7	d1	../LRB410_d1_r7/Snap-92953-Image Export-19.tif	8	TRUE	737.855
LRB410	LRB410/411	7	d1	../LRB410_d1_r7/Snap-92935-Image Export-01.tif	1	TRUE	813.851
LRB410	LRB410/411	7	d1	../LRB410_d1_r7/Snap-92935-Image Export-01.tif	2	TRUE	623.946
LRB410	LRB410/411	7	d1	../LRB410_d1_r7/Snap-92935-Image Export-01.tif	3	TRUE	671.681
LRB410	LRB410/411	7	d1	../LRB410_d1_r7/Snap-92936-Image Export-02.tif	0	TRUE	783.759
LRB410	LRB410/411	7	d1	../LRB410_d1_r7/Snap-92936-Image Export-02.tif	1	TRUE	864.305
LRB410	LRB410/411	7	d1	../LRB410_d1_r7/Snap-92936-Image Export-02.tif	2	TRUE	923.156
LRB410	LRB410/411	7	d1	../LRB410_d1_r7/Snap-92937-Image Export-03.tif	1	TRUE	886.315
LRB410	LRB410/411	7	d1	../LRB410_d1_r7/Snap-92937-Image Export-03.tif	2	TRUE	723.836
LRB410	LRB410/411	7	d1	../LRB410_d1_r7/Snap-92937-Image Export-03.tif	3	TRUE	693.56
LRB410	LRB410/411	7	d1	../LRB410_d1_r7/Snap-92959-Image Export-25.tif	1	TRUE	890.069
LRB410	LRB410/411	7	d1	../LRB410_d1_r7/Snap-92959-Image Export-25.tif	2	TRUE	869.928
LRB410	LRB410/411	7	d1	../LRB410_d1_r7/Snap-92959-Image Export-25.tif	3	TRUE	826.483
LRB410	LRB410/411	7	d1	../LRB410_d1_r7/Snap-92958-Image Export-24.tif	0	TRUE	836.489
LRB410	LRB410/411	7	d1	../LRB410_d1_r7/Snap-92958-Image Export-24.tif	2	TRUE	846.31
LRB410	LRB410/411	7	d1	../LRB410_d1_r7/Snap-92958-Image Export-24.tif	3	TRUE	736.338
LRB410	LRB410/411	7	d1	../LRB410_d1_r7/Snap-92958-Image Export-24.tif	4	TRUE	937.083
LRB410	LRB410/411	7	d1	../LRB410_d1_r7/Snap-92942-Image Export-08.tif	1	TRUE	760.493
LRB410	LRB410/411	7	d1	../LRB410_d1_r7/Snap-92942-Image Export-08.tif	2	TRUE	927.928
LRB410	LRB410/411	7	d1	../LRB410_d1_r7/Snap-92942-Image Export-08.tif	3	TRUE	845.107
LRB410	LRB410/411	7	d1	../LRB410_d1_r7/Snap-92943-Image Export-09.tif	0	TRUE	706.821
LRB410	LRB410/411	7	d1	../LRB410_d1_r7/Snap-92943-Image Export-09.tif	1	TRUE	848.363
LRB410	LRB410/411	7	d1	../LRB410_d1_r7/Snap-92943-Image Export-09.tif	2	TRUE	733.527
LRB410	LRB410/411	7	d1	../LRB410_d1_r7/Snap-92938-Image Export-04.tif	0	TRUE	866.58
LRB410	LRB410/411	7	d1	../LRB410_d1_r7/Snap-92938-Image Export-04.tif	1	TRUE	759.734
LRB410	LRB410/411	7	d1	../LRB410_d1_r7/Snap-92939-Image Export-05.tif	1	TRUE	751.744
LRB410	LRB410/411	7	d1	../LRB410_d1_r7/Snap-92939-Image Export-05.tif	2	TRUE	745.937
LRB410	LRB410/411	7	d1	../LRB410_d1_r7/Snap-92939-Image Export-05.tif	3	TRUE	876.585
LRB411	LRB410/411	7	d1	../LRB411_d1_r7/Snap-92987-Image Export-18.tif	0	TRUE	946.46
LRB411	LRB410/411	7	d1	../LRB411_d1_r7/Snap-92987-Image Export-18.tif	1	TRUE	792.101
LRB411	LRB410/411	7	d1	../LRB411_d1_r7/Snap-92987-Image Export-18.tif	2	TRUE	844.257
LRB411	LRB410/411	7	d1	../LRB411_d1_r7/Snap-92987-Image Export-18.tif	4	TRUE	883.595
LRB411	LRB410/411	7	d1	../LRB411_d1_r7/Snap-92999-Image Export-30.tif	0	TRUE	686.106
LRB411	LRB410/411	7	d1	../LRB411_d1_r7/Snap-92999-Image Export-30.tif	1	TRUE	873.368
LRB411	LRB410/411	7	d1	../LRB411_d1_r7/Snap-92999-Image Export-30.tif	2	TRUE	746.159
LRB411	LRB410/411	7	d1	../LRB411_d1_r7/Snap-92977-Image Export-08.tif	4	TRUE	956.373
LRB411	LRB410/411	7	d1	../LRB411_d1_r7/Snap-92977-Image Export-08.tif	5	TRUE	857.832
LRB411	LRB410/411	7	d1	../LRB411_d1_r7/Snap-92977-Image Export-08.tif	6	TRUE	952.137
LRB411	LRB410/411	7	d1	../LRB411_d1_r7/Snap-92989-Image Export-20.tif	0	TRUE	872.701
LRB411	LRB410/411	7	d1	../LRB411_d1_r7/Snap-92989-Image Export-20.tif	1	TRUE	778.396
LRB411	LRB410/411	7	d1	../LRB411_d1_r7/Snap-92989-Image Export-20.tif	2	TRUE	896.726
LRB411	LRB410/411	7	d1	../LRB411_d1_r7/Snap-92989-Image Export-20.tif	3	TRUE	882.615
LRB411	LRB410/411	7	d1	../LRB411_d1_r7/Snap-92992-Image Export-23.tif	0	TRUE	953.47
LRB411	LRB410/411	7	d1	../LRB411_d1_r7/Snap-92992-Image Export-23.tif	1	TRUE	890.253
LRB411	LRB410/411	7	d1	../LRB411_d1_r7/Snap-92995-Image Export-26.tif	0	TRUE	922.842
LRB411	LRB410/411	7	d1	../LRB411_d1_r7/Snap-92995-Image Export-26.tif	1	TRUE	955.393
LRB411	LRB410/411	7	d1	../LRB411_d1_r7/Snap-92995-Image Export-26.tif	2	TRUE	712
LRB411	LRB410/411	7	d1	../LRB411_d1_r7/Snap-92990-Image Export-21.tif	0	TRUE	809.875
LRB411	LRB410/411	7	d1	../LRB411_d1_r7/Snap-92990-Image Export-21.tif	1	TRUE	945.165
LRB411	LRB410/411	7	d1	../LRB411_d1_r7/Snap-92990-Image Export-21.tif	2	TRUE	719.768
LRB411	LRB410/411	7	d1	../LRB411_d1_r7/Snap-93003-Image Export-34.tif	0	TRUE	959.185
LRB411	LRB410/411	7	d1	../LRB411_d1_r7/Snap-93003-Image Export-34.tif	2	TRUE	666.594
LRB411	LRB410/411	7	d1	../LRB411_d1_r7/Snap-93003-Image Export-34.tif	3	TRUE	899.131
LRB411	LRB410/411	7	d1	../LRB411_d1_r7/Snap-92991-Image Export-22.tif	0	TRUE	783.889
LRB411	LRB410/411	7	d1	../LRB411_d1_r7/Snap-92991-Image Export-22.tif	1	TRUE	953.876
LRB411	LRB410/411	7	d1	../LRB411_d1_r7/Snap-92991-Image Export-22.tif	2	TRUE	945.832
LRB411	LRB410/411	7	d1	../LRB411_d1_r7/Snap-92991-Image Export-22.tif	4	TRUE	848.547
LRB411	LRB410/411	7	d1	../LRB411_d1_r7/Snap-92996-Image Export-27.tif	0	TRUE	861.179
LRB411	LRB410/411	7	d1	../LRB411_d1_r7/Snap-92996-Image Export-27.tif	1	TRUE	871.093
LRB411	LRB410/411	7	d1	../LRB411_d1_r7/Snap-92996-Image Export-27.tif	2	TRUE	868.411
LRB411	LRB410/411	7	d1	../LRB411_d1_r7/Snap-92996-Image Export-27.tif	3	TRUE	915.388
LRB411	LRB410/411	7	d1	../LRB411_d1_r7/Snap-92978-Image Export-09.tif	0	TRUE	899.668
LRB411	LRB410/411	7	d1	../LRB411_d1_r7/Snap-92978-Image Export-09.tif	4	TRUE	868.856
LRB411	LRB410/411	7	d1	../LRB411_d1_r7/Snap-92978-Image Export-09.tif	6	TRUE	900.426
LRB411	LRB410/411	7	d1	../LRB411_d1_r7/Snap-92978-Image Export-09.tif	9	TRUE	921.991
LRB411	LRB410/411	7	d1	../LRB411_d1_r7/Snap-92994-Image Export-25.tif	0	TRUE	929.813
LRB411	LRB410/411	7	d1	../LRB411_d1_r7/Snap-92994-Image Export-25.tif	1	TRUE	917.885
LRB411	LRB410/411	7	d1	../LRB411_d1_r7/Snap-92994-Image Export-25.tif	2	TRUE	925.431
LRB411	LRB410/411	7	d1	../LRB411_d1_r7/Snap-92993-Image Export-24.tif	0	TRUE	939.32
LRB411	LRB410/411	7	d1	../LRB411_d1_r7/Snap-92993-Image Export-24.tif	1	TRUE	904.624
LRB411	LRB410/411	7	d1	../LRB411_d1_r7/Snap-92993-Image Export-24.tif	2	TRUE	958.426
LRB411	LRB410/411	7	d1	../LRB411_d1_r7/Snap-92993-Image Export-24.tif	4	TRUE	901.276
LRB411	LRB410/411	7	d1	../LRB411_d1_r7/Snap-93000-Image Export-31.tif	0	TRUE	1007.68
LRB411	LRB410/411	7	d1	../LRB411_d1_r7/Snap-93000-Image Export-31.tif	1	TRUE	711.333
LRB411	LRB410/411	7	d1	../LRB411_d1_r7/Snap-93000-Image Export-31.tif	2	TRUE	776.029
LRB411	LRB410/411	7	d1	../LRB411_d1_r7/Snap-93000-Image Export-31.tif	3	TRUE	923.378
LRB411	LRB410/411	7	d1	../LRB411_d1_r7/Snap-93002-Image Export-33.tif	0	TRUE	792.6
LRB411	LRB410/411	7	d1	../LRB411_d1_r7/Snap-93002-Image Export-33.tif	1	TRUE	962.808
LRB411	LRB410/411	7	d1	../LRB411_d1_r7/Snap-93002-Image Export-33.tif	2	TRUE	915.204
LRB411	LRB410/411	7	d1	../LRB411_d1_r7/Snap-92988-Image Export-19.tif	0	TRUE	573.361
LRB411	LRB410/411	7	d1	../LRB411_d1_r7/Snap-92988-Image Export-19.tif	1	TRUE	753.483
LRB411	LRB410/411	7	d1	../LRB411_d1_r7/Snap-92988-Image Export-19.tif	2	TRUE	701.42
LRB411	LRB410/411	7	d1	../LRB411_d1_r7/Snap-93001-Image Export-32.tif	0	TRUE	881.098
LRB411	LRB410/411	7	d1	../LRB411_d1_r7/Snap-93001-Image Export-32.tif	1	TRUE	875.827
LRB411	LRB410/411	7	d1	../LRB411_d1_r7/Snap-93001-Image Export-32.tif	2	TRUE	975.533
LRB411	LRB410/411	7	d1	../LRB411_d1_r7/Snap-92979-Image Export-10.tif	0	TRUE	934.049
LRB411	LRB410/411	7	d1	../LRB411_d1_r7/Snap-92979-Image Export-10.tif	5	TRUE	922.435
LRB411	LRB410/411	7	d1	../LRB411_d1_r7/Snap-92979-Image Export-10.tif	7	TRUE	958.518
LRB411	LRB410/411	7	d1	../LRB411_d1_r7/Snap-92979-Image Export-10.tif	8	TRUE	924.581
LRB411	LRB410/411	7	d1	../LRB411_d1_r7/Snap-92979-Image Export-10.tif	9	TRUE	961.866
LRB411	LRB410/411	7	d1	../LRB411_d1_r7/Snap-92997-Image Export-28.tif	1	TRUE	769.464
LRB411	LRB410/411	7	d1	../LRB411_d1_r7/Snap-92997-Image Export-28.tif	2	TRUE	867.875
LRB411	LRB410/411	7	d1	../LRB411_d1_r7/Snap-92983-Image Export-14.tif	1	TRUE	909.803
LRB411	LRB410/411	7	d1	../LRB411_d1_r7/Snap-92983-Image Export-14.tif	2	TRUE	764.507
LRB411	LRB410/411	7	d1	../LRB411_d1_r7/Snap-92983-Image Export-14.tif	3	TRUE	735.396
LRB411	LRB410/411	7	d1	../LRB411_d1_r7/Snap-92975-Image Export-06.tif	0	TRUE	845.957
LRB411	LRB410/411	7	d1	../LRB411_d1_r7/Snap-92975-Image Export-06.tif	1	TRUE	877.252
LRB411	LRB410/411	7	d1	../LRB411_d1_r7/Snap-92975-Image Export-06.tif	2	TRUE	887.793
LRB411	LRB410/411	7	d1	../LRB411_d1_r7/Snap-92975-Image Export-06.tif	3	TRUE	983.301
LRB411	LRB410/411	7	d1	../LRB411_d1_r7/Snap-92975-Image Export-06.tif	5	TRUE	905.16
LRB411	LRB410/411	7	d1	../LRB411_d1_r7/Snap-92975-Image Export-06.tif	7	TRUE	920.919
LRB411	LRB410/411	7	d1	../LRB411_d1_r7/Snap-92972-Image Export-03.tif	0	TRUE	933.513
LRB411	LRB410/411	7	d1	../LRB411_d1_r7/Snap-92972-Image Export-03.tif	2	TRUE	946.016
LRB411	LRB410/411	7	d1	../LRB411_d1_r7/Snap-92972-Image Export-03.tif	4	TRUE	913.151
LRB411	LRB410/411	7	d1	../LRB411_d1_r7/Snap-92972-Image Export-03.tif	5	TRUE	940.653
LRB411	LRB410/411	7	d1	../LRB411_d1_r7/Snap-92972-Image Export-03.tif	6	TRUE	932.219
LRB411	LRB410/411	7	d1	../LRB411_d1_r7/Snap-92970-Image Export-01.tif	2	TRUE	774.918
LRB411	LRB410/411	7	d1	../LRB411_d1_r7/Snap-92970-Image Export-01.tif	3	TRUE	914.407
LRB411	LRB410/411	7	d1	../LRB411_d1_r7/Snap-92970-Image Export-01.tif	5	TRUE	976.736
LRB411	LRB410/411	7	d1	../LRB411_d1_r7/Snap-92976-Image Export-07.tif	1	TRUE	992.272
LRB411	LRB410/411	7	d1	../LRB411_d1_r7/Snap-92976-Image Export-07.tif	3	TRUE	904.088
LRB411	LRB410/411	7	d1	../LRB411_d1_r7/Snap-92971-Image Export-02.tif	1	TRUE	943.02
LRB411	LRB410/411	7	d1	../LRB411_d1_r7/Snap-92971-Image Export-02.tif	2	TRUE	840.909
LRB411	LRB410/411	7	d1	../LRB411_d1_r7/Snap-92971-Image Export-02.tif	3	TRUE	843.59
LRB411	LRB410/411	7	d1	../LRB411_d1_r7/Snap-92971-Image Export-02.tif	4	TRUE	769.149
LRB411	LRB410/411	7	d1	../LRB411_d1_r7/Snap-92998-Image Export-29.tif	0	TRUE	887.609
LRB411	LRB410/411	7	d1	../LRB411_d1_r7/Snap-92998-Image Export-29.tif	1	TRUE	890.513
LRB411	LRB410/411	7	d1	../LRB411_d1_r7/Snap-92998-Image Export-29.tif	2	TRUE	931.368
LRB411	LRB410/411	7	d1	../LRB411_d1_r7/Snap-92998-Image Export-29.tif	3	TRUE	870.686
LRB411	LRB410/411	7	d1	../LRB411_d1_r7/Snap-92998-Image Export-29.tif	4	TRUE	653.111
LRB411	LRB410/411	7	d1	../LRB411_d1_r7/Snap-92974-Image Export-05.tif	1	TRUE	860.643
LRB411	LRB410/411	7	d1	../LRB411_d1_r7/Snap-92974-Image Export-05.tif	2	TRUE	880.247
LRB411	LRB410/411	7	d1	../LRB411_d1_r7/Snap-92974-Image Export-05.tif	3	TRUE	940.301
LRB411	LRB410/411	7	d1	../LRB411_d1_r7/Snap-92974-Image Export-05.tif	4	TRUE	921.011
LRB411	LRB410/411	7	d1	../LRB411_d1_r7/Snap-92973-Image Export-04.tif	0	TRUE	966.194
LRB411	LRB410/411	7	d1	../LRB411_d1_r7/Snap-92973-Image Export-04.tif	4	TRUE	877.788
LRB411	LRB410/411	7	d1	../LRB411_d1_r7/Snap-92973-Image Export-04.tif	5	TRUE	921.547
LRB411	LRB410/411	7	d1	../LRB411_d1_r7/Snap-92973-Image Export-04.tif	6	TRUE	922.712
LRB411	LRB410/411	7	d1	../LRB411_d1_r7/Snap-92985-Image Export-16.tif	1	TRUE	921.011
LRB411	LRB410/411	7	d1	../LRB411_d1_r7/Snap-92985-Image Export-16.tif	2	TRUE	889.977
LRB411	LRB410/411	7	d1	../LRB411_d1_r7/Snap-92985-Image Export-16.tif	3	TRUE	935.566
LRB411	LRB410/411	7	d1	../LRB411_d1_r7/Snap-92985-Image Export-16.tif	4	TRUE	874.18
LRB411	LRB410/411	7	d1	../LRB411_d1_r7/Snap-92985-Image Export-16.tif	5	TRUE	906.455
LRB411	LRB410/411	7	d1	../LRB411_d1_r7/Snap-92982-Image Export-13.tif	1	TRUE	910.783
LRB411	LRB410/411	7	d1	../LRB411_d1_r7/Snap-92980-Image Export-11.tif	0	TRUE	914.353
LRB411	LRB410/411	7	d1	../LRB411_d1_r7/Snap-92980-Image Export-11.tif	1	TRUE	682.574
LRB411	LRB410/411	7	d1	../LRB411_d1_r7/Snap-92980-Image Export-11.tif	2	TRUE	935.658
LRB411	LRB410/411	7	d1	../LRB411_d1_r7/Snap-92980-Image Export-11.tif	3	TRUE	752.097
LRB411	LRB410/411	7	d1	../LRB411_d1_r7/Snap-92980-Image Export-11.tif	4	TRUE	1015.09
LRB411	LRB410/411	7	d1	../LRB411_d1_r7/Snap-92980-Image Export-11.tif	5	TRUE	656.995
LRB411	LRB410/411	7	d1	../LRB411_d1_r7/Snap-92980-Image Export-11.tif	6	TRUE	776.343
LRB411	LRB410/411	7	d1	../LRB411_d1_r7/Snap-92980-Image Export-11.tif	7	TRUE	943.556
LRB411	LRB410/411	7	d1	../LRB411_d1_r7/Snap-92986-Image Export-17.tif	0	TRUE	722.449
LRB411	LRB410/411	7	d1	../LRB411_d1_r7/Snap-92986-Image Export-17.tif	2	TRUE	824.3
LRB411	LRB410/411	7	d1	../LRB411_d1_r7/Snap-92986-Image Export-17.tif	3	TRUE	760.937
LRB411	LRB410/411	7	d1	../LRB411_d1_r7/Snap-92986-Image Export-17.tif	4	TRUE	665.613
LRB411	LRB410/411	7	d1	../LRB411_d1_r7/Snap-92986-Image Export-17.tif	5	TRUE	830.643
LRB411	LRB410/411	7	d1	../LRB411_d1_r7/Snap-92986-Image Export-17.tif	6	TRUE	933.957
LRB411	LRB410/411	7	d1	../LRB411_d1_r7/Snap-92981-Image Export-12.tif	1	TRUE	607.965
LRB411	LRB410/411	7	d1	../LRB411_d1_r7/Snap-92981-Image Export-12.tif	2	TRUE	904.31
LRB411	LRB410/411	7	d1	../LRB411_d1_r7/Snap-92981-Image Export-12.tif	3	TRUE	863.233
LRB411	LRB410/411	7	d1	../LRB411_d1_r7/Snap-92981-Image Export-12.tif	5	TRUE	897.392
LRB411	LRB410/411	7	d1	../LRB411_d1_r7/Snap-92981-Image Export-12.tif	6	TRUE	960.441
LRB411	LRB410/411	7	d1	../LRB411_d1_r7/Snap-92981-Image Export-12.tif	7	TRUE	936.953
LRB411	LRB410/411	7	d1	../LRB411_d1_r7/Snap-92984-Image Export-15.tif	1	TRUE	865.822
LRB411	LRB410/411	7	d1	../LRB411_d1_r7/Snap-92984-Image Export-15.tif	2	TRUE	851.174
LRB411	LRB410/411	7	d1	../LRB411_d1_r7/Snap-92984-Image Export-15.tif	3	TRUE	833.677
LRB411	LRB410/411	7	d1	../LRB411_d1_r7/Snap-92984-Image Export-15.tif	6	TRUE	707.579
N2	N2	7	d11	../N2_d11_r7/Snap-94452-Image Export-09.tif	0	TRUE	324.451
N2	N2	7	d11	../N2_d11_r7/Snap-94452-Image Export-09.tif	1	TRUE	487.252
N2	N2	7	d11	../N2_d11_r7/Snap-94460-Image Export-17.tif	0	TRUE	501.695
N2	N2	7	d11	../N2_d11_r7/Snap-94482-Image Export-39.tif	0	TRUE	448.347
N2	N2	7	d11	../N2_d11_r7/Snap-94481-Image Export-38.tif	0	TRUE	474.72
N2	N2	7	d11	../N2_d11_r7/Snap-94472-Image Export-29.tif	1	TRUE	510.473
N2	N2	7	d11	../N2_d11_r7/Snap-94471-Image Export-28.tif	0	TRUE	591.453
N2	N2	7	d11	../N2_d11_r7/Snap-94477-Image Export-34.tif	0	TRUE	500.105
N2	N2	7	d11	../N2_d11_r7/Snap-94458-Image Export-15.tif	0	TRUE	539.65
N2	N2	7	d11	../N2_d11_r7/Snap-94447-Image Export-04.tif	0	TRUE	463.336
N2	N2	7	d11	../N2_d11_r7/Snap-94473-Image Export-30.tif	0	TRUE	503.988
N2	N2	7	d11	../N2_d11_r7/Snap-94473-Image Export-30.tif	1	TRUE	581.752
N2	N2	7	d11	../N2_d11_r7/Snap-94469-Image Export-26.tif	0	TRUE	257.1
N2	N2	7	d11	../N2_d11_r7/Snap-94488-Image Export-45.tif	0	TRUE	527.674
N2	N2	7	d11	../N2_d11_r7/Snap-94488-Image Export-45.tif	1	TRUE	489.235
N2	N2	7	d11	../N2_d11_r7/Snap-94470-Image Export-27.tif	0	TRUE	487.17
N2	N2	7	d11	../N2_d11_r7/Snap-94459-Image Export-16.tif	0	TRUE	589.07
N2	N2	7	d11	../N2_d11_r7/Snap-94476-Image Export-33.tif	0	TRUE	631.611
N2	N2	7	d11	../N2_d11_r7/Snap-94474-Image Export-31.tif	0	TRUE	498.342
N2	N2	7	d11	../N2_d11_r7/Snap-94475-Image Export-32.tif	0	TRUE	445.04
N2	N2	7	d11	../N2_d11_r7/Snap-94445-Image Export-02.tif	0	TRUE	600.652
N2	N2	7	d11	../N2_d11_r7/Snap-94462-Image Export-19.tif	1	TRUE	553.517
N2	N2	7	d11	../N2_d11_r7/Snap-94485-Image Export-42.tif	0	TRUE	507.65
N2	N2	7	d11	../N2_d11_r7/Snap-94461-Image Export-18.tif	0	TRUE	514.31
N2	N2	7	d11	../N2_d11_r7/Snap-94486-Image Export-43.tif	0	TRUE	594.696
N2	N2	7	d11	../N2_d11_r7/Snap-94487-Image Export-44.tif	0	TRUE	511.926
N2	N2	7	d11	../N2_d11_r7/Snap-94449-Image Export-06.tif	0	TRUE	562.962
N2	N2	7	d11	../N2_d11_r7/Snap-94463-Image Export-20.tif	0	TRUE	568.297
N2	N2	7	d11	../N2_d11_r7/Snap-94463-Image Export-20.tif	1	TRUE	599.437
N2	N2	7	d11	../N2_d11_r7/Snap-94479-Image Export-36.tif	0	TRUE	609.404
DL238	DL238	7	d11	../DL238_d11_r7/Snap-94532-Image Export-44.tif	0	TRUE	791.781
DL238	DL238	7	d11	../DL238_d11_r7/Snap-94533-Image Export-45.tif	0	TRUE	638.324
DL238	DL238	7	d11	../DL238_d11_r7/Snap-94521-Image Export-33.tif	1	TRUE	692.128
DL238	DL238	7	d11	../DL238_d11_r7/Snap-94550-Image Export-62.tif	0	TRUE	674.325
DL238	DL238	7	d11	../DL238_d11_r7/Snap-94520-Image Export-32.tif	0	TRUE	706.836
DL238	DL238	7	d11	../DL238_d11_r7/Snap-94551-Image Export-63.tif	0	TRUE	698.322
DL238	DL238	7	d11	../DL238_d11_r7/Snap-94548-Image Export-60.tif	0	TRUE	660.723
DL238	DL238	7	d11	../DL238_d11_r7/Snap-94525-Image Export-37.tif	0	TRUE	688.73
DL238	DL238	7	d11	../DL238_d11_r7/Snap-94493-Image Export-05.tif	0	TRUE	687.406
DL238	DL238	7	d11	../DL238_d11_r7/Snap-94493-Image Export-05.tif	1	TRUE	703.639
DL238	DL238	7	d11	../DL238_d11_r7/Snap-94524-Image Export-36.tif	0	TRUE	715.879
DL238	DL238	7	d11	../DL238_d11_r7/Snap-94492-Image Export-04.tif	0	TRUE	670.205
DL238	DL238	7	d11	../DL238_d11_r7/Snap-94492-Image Export-04.tif	1	TRUE	701.217
DL238	DL238	7	d11	../DL238_d11_r7/Snap-94555-Image Export-67.tif	0	TRUE	680.308
DL238	DL238	7	d11	../DL238_d11_r7/Snap-94555-Image Export-67.tif	1	TRUE	761.663
DL238	DL238	7	d11	../DL238_d11_r7/Snap-94535-Image Export-47.tif	0	TRUE	641.622
DL238	DL238	7	d11	../DL238_d11_r7/Snap-94529-Image Export-41.tif	1	TRUE	684.364
DL238	DL238	7	d11	../DL238_d11_r7/Snap-94516-Image Export-28.tif	0	TRUE	469.366
DL238	DL238	7	d11	../DL238_d11_r7/Snap-94534-Image Export-46.tif	2	TRUE	750.527
DL238	DL238	7	d11	../DL238_d11_r7/Snap-94528-Image Export-40.tif	0	TRUE	680.947
DL238	DL238	7	d11	../DL238_d11_r7/Snap-94517-Image Export-29.tif	0	TRUE	659.663
DL238	DL238	7	d11	../DL238_d11_r7/Snap-94517-Image Export-29.tif	2	TRUE	622.704
DL238	DL238	7	d11	../DL238_d11_r7/Snap-94517-Image Export-29.tif	3	TRUE	697.482
DL238	DL238	7	d11	../DL238_d11_r7/Snap-94490-Image Export-02.tif	0	TRUE	659.069
DL238	DL238	7	d11	../DL238_d11_r7/Snap-94491-Image Export-03.tif	0	TRUE	637.136
DL238	DL238	7	d11	../DL238_d11_r7/Snap-94530-Image Export-42.tif	0	TRUE	659.554
DL238	DL238	7	d11	../DL238_d11_r7/Snap-94494-Image Export-06.tif	0	TRUE	692.877
DL238	DL238	7	d11	../DL238_d11_r7/Snap-94494-Image Export-06.tif	1	TRUE	643.476
DL238	DL238	7	d11	../DL238_d11_r7/Snap-94522-Image Export-34.tif	0	TRUE	558.989
DL238	DL238	7	d11	../DL238_d11_r7/Snap-94495-Image Export-07.tif	0	TRUE	696.578
DL238	DL238	7	d11	../DL238_d11_r7/Snap-94495-Image Export-07.tif	2	TRUE	653.625
DL238	DL238	7	d11	../DL238_d11_r7/Snap-94523-Image Export-35.tif	0	TRUE	688.64
DL238	DL238	7	d11	../DL238_d11_r7/Snap-94523-Image Export-35.tif	1	TRUE	681.231
DL238	DL238	7	d11	../DL238_d11_r7/Snap-94489-Image Export-01.tif	0	TRUE	568.982
DL238	DL238	7	d11	../DL238_d11_r7/Snap-94489-Image Export-01.tif	2	TRUE	679.468
DL238	DL238	7	d11	../DL238_d11_r7/Snap-94547-Image Export-59.tif	1	TRUE	701.52
DL238	DL238	7	d11	../DL238_d11_r7/Snap-94547-Image Export-59.tif	2	TRUE	154.397
DL238	DL238	7	d11	../DL238_d11_r7/Snap-94546-Image Export-58.tif	0	TRUE	675.786
DL238	DL238	7	d11	../DL238_d11_r7/Snap-94546-Image Export-58.tif	1	TRUE	630.487
DL238	DL238	7	d11	../DL238_d11_r7/Snap-94539-Image Export-51.tif	2	TRUE	680.637
DL238	DL238	7	d11	../DL238_d11_r7/Snap-94539-Image Export-51.tif	3	TRUE	584.529
DL238	DL238	7	d11	../DL238_d11_r7/Snap-94539-Image Export-51.tif	4	TRUE	748.052
DL238	DL238	7	d11	../DL238_d11_r7/Snap-94498-Image Export-10.tif	1	TRUE	691.901
DL238	DL238	7	d11	../DL238_d11_r7/Snap-94498-Image Export-10.tif	3	TRUE	658.559
DL238	DL238	7	d11	../DL238_d11_r7/Snap-94499-Image Export-11.tif	0	TRUE	656.64
DL238	DL238	7	d11	../DL238_d11_r7/Snap-94502-Image Export-14.tif	0	TRUE	658.73
DL238	DL238	7	d11	../DL238_d11_r7/Snap-94502-Image Export-14.tif	1	TRUE	703.446
DL238	DL238	7	d11	../DL238_d11_r7/Snap-94502-Image Export-14.tif	2	TRUE	750.107
DL238	DL238	7	d11	../DL238_d11_r7/Snap-94502-Image Export-14.tif	4	TRUE	761.708
DL238	DL238	7	d11	../DL238_d11_r7/Snap-94503-Image Export-15.tif	2	TRUE	691.599
DL238	DL238	7	d11	../DL238_d11_r7/Snap-94503-Image Export-15.tif	3	TRUE	634.46
DL238	DL238	7	d11	../DL238_d11_r7/Snap-94501-Image Export-13.tif	0	TRUE	614.236
DL238	DL238	7	d11	../DL238_d11_r7/Snap-94500-Image Export-12.tif	0	TRUE	773.063
DL238	DL238	7	d11	../DL238_d11_r7/Snap-94500-Image Export-12.tif	2	TRUE	685.908
DL238	DL238	7	d11	../DL238_d11_r7/Snap-94559-Image Export-71.tif	2	TRUE	658.385
DL238	DL238	7	d11	../DL238_d11_r7/Snap-94559-Image Export-71.tif	3	TRUE	702.012
DL238	DL238	7	d11	../DL238_d11_r7/Snap-94505-Image Export-17.tif	3	TRUE	688.904
DL238	DL238	7	d11	../DL238_d11_r7/Snap-94504-Image Export-16.tif	0	TRUE	779.658
DL238	DL238	7	d11	../DL238_d11_r7/Snap-94504-Image Export-16.tif	2	TRUE	680.308
DL238	DL238	7	d11	../DL238_d11_r7/Snap-94507-Image Export-19.tif	0	TRUE	651.634
DL238	DL238	7	d11	../DL238_d11_r7/Snap-94506-Image Export-18.tif	1	TRUE	736.433
DL238	DL238	7	d11	../DL238_d11_r7/Snap-94506-Image Export-18.tif	2	TRUE	704.588
DL238	DL238	7	d11	../DL238_d11_r7/Snap-94542-Image Export-54.tif	0	TRUE	665.973
DL238	DL238	7	d11	../DL238_d11_r7/Snap-94542-Image Export-54.tif	2	TRUE	604.197
DL238	DL238	7	d11	../DL238_d11_r7/Snap-94543-Image Export-55.tif	0	TRUE	624.312
DL238	DL238	7	d11	../DL238_d11_r7/Snap-94541-Image Export-53.tif	0	TRUE	784.838
DL238	DL238	7	d11	../DL238_d11_r7/Snap-94541-Image Export-53.tif	1	TRUE	684.519
DL238	DL238	7	d11	../DL238_d11_r7/Snap-94540-Image Export-52.tif	0	TRUE	666.733
DL238	DL238	7	d11	../DL238_d11_r7/Snap-94518-Image Export-30.tif	4	TRUE	658.074
DL238	DL238	7	d11	../DL238_d11_r7/Snap-94518-Image Export-30.tif	5	TRUE	702.095
DL238	DL238	7	d11	../DL238_d11_r7/Snap-94519-Image Export-31.tif	3	TRUE	668.332
DL238	DL238	7	d11	../DL238_d11_r7/Snap-94545-Image Export-57.tif	0	TRUE	701.391
DL238	DL238	7	d11	../DL238_d11_r7/Snap-94496-Image Export-08.tif	1	TRUE	655.051
DL238	DL238	7	d11	../DL238_d11_r7/Snap-94497-Image Export-09.tif	0	TRUE	654.722
DL238	DL238	7	d11	../DL238_d11_r7/Snap-94497-Image Export-09.tif	3	TRUE	570.105
DL238	DL238	7	d11	../DL238_d11_r7/Snap-94510-Image Export-22.tif	0	TRUE	641.713
DL238	DL238	7	d11	../DL238_d11_r7/Snap-94511-Image Export-23.tif	0	TRUE	626.476
DL238	DL238	7	d11	../DL238_d11_r7/Snap-94560-Image Export-72.tif	0	TRUE	672.699
DL238	DL238	7	d11	../DL238_d11_r7/Snap-94560-Image Export-72.tif	1	TRUE	645.55
DL238	DL238	7	d11	../DL238_d11_r7/Snap-94560-Image Export-72.tif	3	TRUE	650.291
DL238	DL238	7	d11	../DL238_d11_r7/Snap-94537-Image Export-49.tif	0	TRUE	467.777
DL238	DL238	7	d11	../DL238_d11_r7/Snap-94537-Image Export-49.tif	1	TRUE	631.455
DL238	DL238	7	d11	../DL238_d11_r7/Snap-94514-Image Export-26.tif	0	TRUE	681.897
DL238	DL238	7	d11	../DL238_d11_r7/Snap-94514-Image Export-26.tif	1	TRUE	702.734
DL238	DL238	7	d11	../DL238_d11_r7/Snap-94508-Image Export-20.tif	0	TRUE	629.034
DL238	DL238	7	d11	../DL238_d11_r7/Snap-94536-Image Export-48.tif	0	TRUE	661.536
DL238	DL238	7	d11	../DL238_d11_r7/Snap-94536-Image Export-48.tif	1	TRUE	188.735
DL238	DL238	7	d11	../DL238_d11_r7/Snap-94515-Image Export-27.tif	0	TRUE	637.585
DL238	DL238	7	d11	../DL238_d11_r7/Snap-94509-Image Export-21.tif	0	TRUE	664.715
DL238	DL238	7	d11	../DL238_d11_r7/Snap-94556-Image Export-68.tif	3	TRUE	671.73
DL238	DL238	7	d11	../DL238_d11_r7/Snap-94556-Image Export-68.tif	4	TRUE	672.388
DL238	DL238	7	d11	../DL238_d11_r7/Snap-94556-Image Export-68.tif	5	TRUE	731.756
DL238	DL238	7	d11	../DL238_d11_r7/Snap-94527-Image Export-39.tif	0	TRUE	635.602
DL238	DL238	7	d11	../DL238_d11_r7/Snap-94557-Image Export-69.tif	0	TRUE	683.524
DL238	DL238	7	d11	../DL238_d11_r7/Snap-94513-Image Export-25.tif	0	TRUE	689.918
DL238	DL238	7	d11	../DL238_d11_r7/Snap-94513-Image Export-25.tif	1	TRUE	657.526
DL238	DL238	7	d11	../DL238_d11_r7/Snap-94512-Image Export-24.tif	0	TRUE	666.058
DL238	DL238	7	d11	../DL238_d11_r7/Snap-94512-Image Export-24.tif	1	TRUE	727.609
LRB410	LRB410/411	7	d11	../LRB410_d11_r7/Snap-94610-Image Export-50.tif	0	TRUE	657.371
LRB410	LRB410/411	7	d11	../LRB410_d11_r7/Snap-94621-Image Export-61.tif	0	TRUE	638.845
LRB410	LRB410/411	7	d11	../LRB410_d11_r7/Snap-94612-Image Export-52.tif	1	TRUE	430.196
LRB410	LRB410/411	7	d11	../LRB410_d11_r7/Snap-94620-Image Export-60.tif	0	TRUE	473.997
LRB410	LRB410/411	7	d11	../LRB410_d11_r7/Snap-94615-Image Export-55.tif	0	TRUE	505.777
LRB410	LRB410/411	7	d11	../LRB410_d11_r7/Snap-94627-Image Export-67.tif	0	TRUE	576.299
LRB410	LRB410/411	7	d11	../LRB410_d11_r7/Snap-94614-Image Export-54.tif	0	TRUE	357.82
LRB410	LRB410/411	7	d11	../LRB410_d11_r7/Snap-94617-Image Export-57.tif	0	TRUE	730.988
LRB410	LRB410/411	7	d11	../LRB410_d11_r7/Snap-94624-Image Export-64.tif	0	TRUE	469.147
LRB410	LRB410/411	7	d11	../LRB410_d11_r7/Snap-94624-Image Export-64.tif	1	TRUE	631.017
LRB410	LRB410/411	7	d11	../LRB410_d11_r7/Snap-94616-Image Export-56.tif	0	TRUE	699.901
LRB410	LRB410/411	7	d11	../LRB410_d11_r7/Snap-94587-Image Export-27.tif	0	TRUE	618.795
LRB410	LRB410/411	7	d11	../LRB410_d11_r7/Snap-94568-Image Export-08.tif	0	TRUE	655.918
LRB410	LRB410/411	7	d11	../LRB410_d11_r7/Snap-94584-Image Export-24.tif	0	TRUE	569.95
LRB410	LRB410/411	7	d11	../LRB410_d11_r7/Snap-94581-Image Export-21.tif	0	TRUE	622.567
LRB410	LRB410/411	7	d11	../LRB410_d11_r7/Snap-94581-Image Export-21.tif	1	TRUE	610.773
LRB410	LRB410/411	7	d11	../LRB410_d11_r7/Snap-94581-Image Export-21.tif	2	TRUE	364.343
LRB410	LRB410/411	7	d11	../LRB410_d11_r7/Snap-94578-Image Export-18.tif	1	TRUE	462.086
LRB410	LRB410/411	7	d11	../LRB410_d11_r7/Snap-94579-Image Export-19.tif	0	TRUE	471.878
LRB410	LRB410/411	7	d11	../LRB410_d11_r7/Snap-94595-Image Export-35.tif	0	TRUE	397.667
LRB410	LRB410/411	7	d11	../LRB410_d11_r7/Snap-94595-Image Export-35.tif	1	TRUE	644.271
LRB410	LRB410/411	7	d11	../LRB410_d11_r7/Snap-94590-Image Export-30.tif	0	TRUE	548.822
LRB410	LRB410/411	7	d11	../LRB410_d11_r7/Snap-94593-Image Export-33.tif	0	TRUE	478.428
LRB410	LRB410/411	7	d11	../LRB410_d11_r7/Snap-94593-Image Export-33.tif	1	TRUE	596.35
LRB410	LRB410/411	7	d11	../LRB410_d11_r7/Snap-94631-Image Export-71.tif	0	TRUE	690.914
LRB410	LRB410/411	7	d11	../LRB410_d11_r7/Snap-94631-Image Export-71.tif	1	TRUE	665.545
LRB410	LRB410/411	7	d11	../LRB410_d11_r7/Snap-94603-Image Export-43.tif	0	TRUE	568.891
LRB410	LRB410/411	7	d11	../LRB410_d11_r7/Snap-94603-Image Export-43.tif	1	TRUE	634.342
LRB410	LRB410/411	7	d11	../LRB410_d11_r7/Snap-94602-Image Export-42.tif	1	TRUE	586.228
LRB410	LRB410/411	7	d11	../LRB410_d11_r7/Snap-94630-Image Export-70.tif	0	TRUE	446.849
LRB410	LRB410/411	7	d11	../LRB410_d11_r7/Snap-94601-Image Export-41.tif	0	TRUE	669.301
LRB410	LRB410/411	7	d11	../LRB410_d11_r7/Snap-94600-Image Export-40.tif	0	TRUE	460.652
LRB410	LRB410/411	7	d11	../LRB410_d11_r7/Snap-94635-Image Export-75.tif	0	TRUE	506.746
LRB410	LRB410/411	7	d11	../LRB410_d11_r7/Snap-94606-Image Export-46.tif	0	TRUE	675.567
LRB410	LRB410/411	7	d11	../LRB410_d11_r7/Snap-94637-Image Export-77.tif	0	TRUE	486.896
LRB410	LRB410/411	7	d11	../LRB410_d11_r7/Snap-94637-Image Export-77.tif	1	TRUE	444.73
LRB410	LRB410/411	7	d11	../LRB410_d11_r7/Snap-94618-Image Export-58.tif	0	TRUE	621.599
LRB410	LRB410/411	7	d11	../LRB410_d11_r7/Snap-94618-Image Export-58.tif	1	TRUE	329.612
LRB410	LRB410/411	7	d11	../LRB410_d11_r7/Snap-94628-Image Export-68.tif	0	TRUE	482.785
LRB410	LRB410/411	7	d11	../LRB410_d11_r7/Snap-94629-Image Export-69.tif	0	TRUE	511.706
LRB410	LRB410/411	7	d11	../LRB410_d11_r7/Snap-94565-Image Export-05.tif	2	TRUE	575.066
LRB410	LRB410/411	7	d11	../LRB410_d11_r7/Snap-94588-Image Export-28.tif	1	TRUE	352.459
LRB410	LRB410/411	7	d11	../LRB410_d11_r7/Snap-94564-Image Export-04.tif	0	TRUE	664.231
LRB410	LRB410/411	7	d11	../LRB410_d11_r7/Snap-94562-Image Export-02.tif	1	TRUE	596.24
LRB410	LRB410/411	7	d11	../LRB410_d11_r7/Snap-94561-Image Export-01.tif	0	TRUE	453.508
LRB410	LRB410/411	7	d11	../LRB410_d11_r7/Snap-94575-Image Export-15.tif	0	TRUE	675.786
LRB410	LRB410/411	7	d11	../LRB410_d11_r7/Snap-94598-Image Export-38.tif	0	TRUE	610.856
LRB410	LRB410/411	7	d11	../LRB410_d11_r7/Snap-94574-Image Export-14.tif	1	TRUE	714.755
LRB410	LRB410/411	7	d11	../LRB410_d11_r7/Snap-94573-Image Export-13.tif	0	TRUE	482.886
LRB410	LRB410/411	7	d11	../LRB410_d11_r7/Snap-94608-Image Export-48.tif	0	TRUE	579.633
LRB410	LRB410/411	7	d11	../LRB410_d11_r7/Snap-94609-Image Export-49.tif	1	TRUE	464.205
LRB411	LRB410/411	7	d11	../LRB411_d11_r7/Snap-94699-Image Export-61.tif	0	TRUE	721.305
LRB411	LRB410/411	7	d11	../LRB411_d11_r7/Snap-94699-Image Export-61.tif	1	TRUE	687.342
LRB411	LRB410/411	7	d11	../LRB411_d11_r7/Snap-94698-Image Export-60.tif	1	TRUE	593.262
LRB411	LRB410/411	7	d11	../LRB411_d11_r7/Snap-94698-Image Export-60.tif	2	TRUE	736.186
LRB411	LRB410/411	7	d11	../LRB411_d11_r7/Snap-94703-Image Export-65.tif	3	TRUE	637.237
LRB411	LRB410/411	7	d11	../LRB411_d11_r7/Snap-94702-Image Export-64.tif	0	TRUE	539.449
LRB411	LRB410/411	7	d11	../LRB411_d11_r7/Snap-94702-Image Export-64.tif	2	TRUE	732.989
LRB411	LRB410/411	7	d11	../LRB411_d11_r7/Snap-94686-Image Export-48.tif	0	TRUE	667.912
LRB411	LRB410/411	7	d11	../LRB411_d11_r7/Snap-94700-Image Export-62.tif	1	TRUE	626.321
LRB411	LRB410/411	7	d11	../LRB411_d11_r7/Snap-94700-Image Export-62.tif	3	TRUE	678.628
LRB411	LRB410/411	7	d11	../LRB411_d11_r7/Snap-94656-Image Export-18.tif	1	TRUE	653.689
LRB411	LRB410/411	7	d11	../LRB411_d11_r7/Snap-94704-Image Export-66.tif	0	TRUE	710.169
LRB411	LRB410/411	7	d11	../LRB411_d11_r7/Snap-94704-Image Export-66.tif	1	TRUE	357.903
LRB411	LRB410/411	7	d11	../LRB411_d11_r7/Snap-94666-Image Export-28.tif	0	TRUE	637.877
LRB411	LRB410/411	7	d11	../LRB411_d11_r7/Snap-94710-Image Export-72.tif	0	TRUE	598.158
LRB411	LRB410/411	7	d11	../LRB411_d11_r7/Snap-94696-Image Export-58.tif	0	TRUE	683.815
LRB411	LRB410/411	7	d11	../LRB411_d11_r7/Snap-94697-Image Export-59.tif	0	TRUE	716.272
LRB411	LRB410/411	7	d11	../LRB411_d11_r7/Snap-94697-Image Export-59.tif	1	TRUE	557.71
LRB411	LRB410/411	7	d11	../LRB411_d11_r7/Snap-94714-Image Export-76.tif	1	TRUE	644.025
LRB411	LRB410/411	7	d11	../LRB411_d11_r7/Snap-94714-Image Export-76.tif	2	TRUE	602.105
LRB411	LRB410/411	7	d11	../LRB411_d11_r7/Snap-94714-Image Export-76.tif	3	TRUE	380.046
LRB411	LRB410/411	7	d11	../LRB411_d11_r7/Snap-94714-Image Export-76.tif	4	TRUE	690.429
LRB411	LRB410/411	7	d11	../LRB411_d11_r7/Snap-94676-Image Export-38.tif	2	TRUE	655.581
LRB411	LRB410/411	7	d11	../LRB411_d11_r7/Snap-94639-Image Export-01.tif	0	TRUE	705.648
LRB411	LRB410/411	7	d11	../LRB411_d11_r7/Snap-94709-Image Export-71.tif	0	TRUE	585.123
LRB411	LRB410/411	7	d11	../LRB411_d11_r7/Snap-94715-Image Export-77.tif	0	TRUE	619.544
LRB411	LRB410/411	7	d11	../LRB411_d11_r7/Snap-94715-Image Export-77.tif	2	TRUE	584.355
LRB411	LRB410/411	7	d11	../LRB411_d11_r7/Snap-94715-Image Export-77.tif	3	TRUE	689.15
LRB411	LRB410/411	7	d11	../LRB411_d11_r7/Snap-94646-Image Export-08.tif	0	TRUE	712.152
LRB411	LRB410/411	7	d11	../LRB411_d11_r7/Snap-94647-Image Export-09.tif	0	TRUE	732.43
LRB411	LRB410/411	7	d11	../LRB411_d11_r7/Snap-94659-Image Export-21.tif	0	TRUE	659.974
LRB411	LRB410/411	7	d11	../LRB411_d11_r7/Snap-94658-Image Export-20.tif	0	TRUE	659.16
LRB411	LRB410/411	7	d11	../LRB411_d11_r7/Snap-94713-Image Export-75.tif	0	TRUE	636.004
LRB411	LRB410/411	7	d11	../LRB411_d11_r7/Snap-94712-Image Export-74.tif	0	TRUE	609.294
LRB411	LRB410/411	7	d11	../LRB411_d11_r7/Snap-94642-Image Export-04.tif	2	TRUE	679.074
LRB411	LRB410/411	7	d11	../LRB411_d11_r7/Snap-94673-Image Export-35.tif	0	TRUE	670.141
LRB411	LRB410/411	7	d11	../LRB411_d11_r7/Snap-94693-Image Export-55.tif	0	TRUE	608.874
LRB411	LRB410/411	7	d11	../LRB411_d11_r7/Snap-94693-Image Export-55.tif	1	TRUE	650.291
LRB411	LRB410/411	7	d11	../LRB411_d11_r7/Snap-94693-Image Export-55.tif	2	TRUE	613.486
LRB411	LRB410/411	7	d11	../LRB411_d11_r7/Snap-94678-Image Export-40.tif	0	TRUE	710.379
LRB411	LRB410/411	7	d11	../LRB411_d11_r7/Snap-94678-Image Export-40.tif	2	TRUE	623.873
LRB411	LRB410/411	7	d11	../LRB411_d11_r7/Snap-94678-Image Export-40.tif	3	TRUE	648.929
LRB411	LRB410/411	7	d11	../LRB411_d11_r7/Snap-94692-Image Export-54.tif	0	TRUE	663.591
LRB411	LRB410/411	7	d11	../LRB411_d11_r7/Snap-94692-Image Export-54.tif	1	TRUE	702.186
LRB411	LRB410/411	7	d11	../LRB411_d11_r7/Snap-94679-Image Export-41.tif	0	TRUE	546.109
LRB411	LRB410/411	7	d11	../LRB411_d11_r7/Snap-94679-Image Export-41.tif	1	TRUE	711.558
LRB411	LRB410/411	7	d11	../LRB411_d11_r7/Snap-94716-Image Export-78.tif	1	TRUE	662.596
LRB411	LRB410/411	7	d11	../LRB411_d11_r7/Snap-94716-Image Export-78.tif	2	TRUE	657.919
LRB411	LRB410/411	7	d11	../LRB411_d11_r7/Snap-94716-Image Export-78.tif	4	TRUE	615.688
LRB411	LRB410/411	7	d11	../LRB411_d11_r7/Snap-94674-Image Export-36.tif	0	TRUE	639.485
LRB411	LRB410/411	7	d11	../LRB411_d11_r7/Snap-94668-Image Export-30.tif	0	TRUE	622.064
LRB411	LRB410/411	7	d11	../LRB411_d11_r7/Snap-94675-Image Export-37.tif	1	TRUE	644.445
LRB411	LRB410/411	7	d11	../LRB411_d11_r7/Snap-94717-Image Export-79.tif	1	TRUE	715.395
LRB411	LRB410/411	7	d11	../LRB411_d11_r7/Snap-94669-Image Export-31.tif	0	TRUE	658.165
LRB411	LRB410/411	7	d11	../LRB411_d11_r7/Snap-94688-Image Export-50.tif	0	TRUE	684.5
LRB411	LRB410/411	7	d11	../LRB411_d11_r7/Snap-94640-Image Export-02.tif	0	TRUE	504.453
LRB411	LRB410/411	7	d11	../LRB411_d11_r7/Snap-94689-Image Export-51.tif	0	TRUE	664.094
LRB411	LRB410/411	7	d11	../LRB411_d11_r7/Snap-94695-Image Export-57.tif	0	TRUE	627.71
LRB411	LRB410/411	7	d11	../LRB411_d11_r7/Snap-94695-Image Export-57.tif	1	TRUE	671.904
LRB411	LRB410/411	7	d11	../LRB411_d11_r7/Snap-94695-Image Export-57.tif	3	TRUE	625.371
LRB411	LRB410/411	7	d11	../LRB411_d11_r7/Snap-94641-Image Export-03.tif	0	TRUE	566.652
LRB411	LRB410/411	7	d11	../LRB411_d11_r7/Snap-94671-Image Export-33.tif	1	TRUE	626.011
LRB411	LRB410/411	7	d11	../LRB411_d11_r7/Snap-94671-Image Export-33.tif	2	TRUE	613.441
LRB411	LRB410/411	7	d11	../LRB411_d11_r7/Snap-94671-Image Export-33.tif	3	TRUE	582.546
LRB411	LRB410/411	7	d11	../LRB411_d11_r7/Snap-94706-Image Export-68.tif	0	TRUE	712.791
LRB411	LRB410/411	7	d11	../LRB411_d11_r7/Snap-94706-Image Export-68.tif	1	TRUE	643.038
LRB411	LRB410/411	7	d11	../LRB411_d11_r7/Snap-94664-Image Export-26.tif	0	TRUE	532.351
LRB411	LRB410/411	7	d11	../LRB411_d11_r7/Snap-94664-Image Export-26.tif	1	TRUE	618.666
LRB411	LRB410/411	7	d11	../LRB411_d11_r7/Snap-94664-Image Export-26.tif	2	TRUE	648.528
LRB411	LRB410/411	7	d11	../LRB411_d11_r7/Snap-94707-Image Export-69.tif	0	TRUE	637.347
LRB411	LRB410/411	7	d11	../LRB411_d11_r7/Snap-94648-Image Export-10.tif	0	TRUE	640.124
LRB411	LRB410/411	7	d11	../LRB411_d11_r7/Snap-94648-Image Export-10.tif	2	TRUE	674.617
LRB411	LRB410/411	7	d11	../LRB411_d11_r7/Snap-94648-Image Export-10.tif	3	TRUE	595.774
LRB411	LRB410/411	7	d11	../LRB411_d11_r7/Snap-94680-Image Export-42.tif	1	TRUE	644.271
LRB411	LRB410/411	7	d11	../LRB411_d11_r7/Snap-94680-Image Export-42.tif	2	TRUE	653.908
LRB411	LRB410/411	7	d11	../LRB411_d11_r7/Snap-94681-Image Export-43.tif	0	TRUE	695.344
LRB411	LRB410/411	7	d11	../LRB411_d11_r7/Snap-94660-Image Export-22.tif	0	TRUE	672.525
LRB411	LRB410/411	7	d11	../LRB411_d11_r7/Snap-94660-Image Export-22.tif	1	TRUE	656.501
LRB411	LRB410/411	7	d11	../LRB411_d11_r7/Snap-94661-Image Export-23.tif	0	TRUE	719.716
LRB411	LRB410/411	7	d11	../LRB411_d11_r7/Snap-94661-Image Export-23.tif	1	TRUE	663.92
LRB411	LRB410/411	7	d11	../LRB411_d11_r7/Snap-94684-Image Export-46.tif	0	TRUE	582.391
LRB411	LRB410/411	7	d11	../LRB411_d11_r7/Snap-94685-Image Export-47.tif	0	TRUE	676.27
LRB411	LRB410/411	7	d11	../LRB411_d11_r7/Snap-94685-Image Export-47.tif	1	TRUE	617.698
LRB411	LRB410/411	7	d11	../LRB411_d11_r7/Snap-94663-Image Export-25.tif	0	TRUE	638.225
LRB411	LRB410/411	7	d11	../LRB411_d11_r7/Snap-94718-Image Export-80.tif	1	TRUE	647.669
LRB411	LRB410/411	7	d11	../LRB411_d11_r7/Snap-94718-Image Export-80.tif	2	TRUE	688.466
LRB411	LRB410/411	7	d11	../LRB411_d11_r7/Snap-94662-Image Export-24.tif	0	TRUE	594.011
LRB411	LRB410/411	7	d11	../LRB411_d11_r7/Snap-94653-Image Export-15.tif	0	TRUE	659.599
LRB411	LRB410/411	7	d11	../LRB411_d11_r7/Snap-94653-Image Export-15.tif	1	TRUE	608.189
[truncated: 669 more rows]

## Sheet: Fig3-supp1D
strain	day	replicate	imageFile	id	pass	length
EG4725	d1	r3	../EG4725_d1_r3/Snap-97137-Image Export-27.tif	0	TRUE	816.754
EG4725	d1	r3	../EG4725_d1_r3/Snap-97136-Image Export-26.tif	0	TRUE	825.189
EG4725	d1	r3	../EG4725_d1_r3/Snap-97136-Image Export-26.tif	1	TRUE	816.532
EG4725	d1	r3	../EG4725_d1_r3/Snap-97135-Image Export-25.tif	6	TRUE	856.667
EG4725	d1	r3	../EG4725_d1_r3/Snap-97134-Image Export-24.tif	1	TRUE	888.682
EG4725	d1	r3	../EG4725_d1_r3/Snap-97133-Image Export-23.tif	1	TRUE	791.749
EG4725	d1	r3	../EG4725_d1_r3/Snap-97133-Image Export-23.tif	2	TRUE	781.836
EG4725	d1	r3	../EG4725_d1_r3/Snap-97148-Image Export-38.tif	0	TRUE	851.136
EG4725	d1	r3	../EG4725_d1_r3/Snap-97132-Image Export-22.tif	0	TRUE	824.744
EG4725	d1	r3	../EG4725_d1_r3/Snap-97149-Image Export-39.tif	0	TRUE	790.807
EG4725	d1	r3	../EG4725_d1_r3/Snap-97149-Image Export-39.tif	1	TRUE	795.503
EG4725	d1	r3	../EG4725_d1_r3/Snap-97131-Image Export-21.tif	0	TRUE	765.672
EG4725	d1	r3	../EG4725_d1_r3/Snap-97158-Image Export-48.tif	0	TRUE	841.851
EG4725	d1	r3	../EG4725_d1_r3/Snap-97158-Image Export-48.tif	1	TRUE	861.716
EG4725	d1	r3	../EG4725_d1_r3/Snap-97129-Image Export-19.tif	0	TRUE	820.508
EG4725	d1	r3	../EG4725_d1_r3/Snap-97129-Image Export-19.tif	3	TRUE	853.726
EG4725	d1	r3	../EG4725_d1_r3/Snap-97128-Image Export-18.tif	0	TRUE	745.715
EG4725	d1	r3	../EG4725_d1_r3/Snap-97116-Image Export-06.tif	0	TRUE	848.455
EG4725	d1	r3	../EG4725_d1_r3/Snap-97115-Image Export-05.tif	0	TRUE	844.034
EG4725	d1	r3	../EG4725_d1_r3/Snap-97113-Image Export-03.tif	0	TRUE	827.242
EG4725	d1	r3	../EG4725_d1_r3/Snap-97112-Image Export-02.tif	1	TRUE	850.822
EG4725	d1	r3	../EG4725_d1_r3/Snap-97111-Image Export-01.tif	0	TRUE	871.315
EG4725	d1	r3	../EG4725_d1_r3/Snap-97141-Image Export-31.tif	0	TRUE	803.179
EG4725	d1	r3	../EG4725_d1_r3/Snap-97141-Image Export-31.tif	1	TRUE	838.542
EG4725	d1	r3	../EG4725_d1_r3/Snap-97140-Image Export-30.tif	0	TRUE	836.749
EG4725	d1	r3	../EG4725_d1_r3/Snap-97140-Image Export-30.tif	1	TRUE	751.744
EG4725	d1	r3	../EG4725_d1_r3/Snap-97138-Image Export-28.tif	0	TRUE	809.116
EG4725	d1	r3	../EG4725_d1_r3/Snap-97143-Image Export-33.tif	0	TRUE	831.44
EG4725	d1	r3	../EG4725_d1_r3/Snap-97143-Image Export-33.tif	1	TRUE	863.861
EG4725	d1	r3	../EG4725_d1_r3/Snap-97142-Image Export-32.tif	0	TRUE	842.74
EG4725	d1	r3	../EG4725_d1_r3/Snap-97142-Image Export-32.tif	1	TRUE	815.996
EG4725	d1	r3	../EG4725_d1_r3/Snap-97145-Image Export-35.tif	0	TRUE	895.469
EG4725	d1	r3	../EG4725_d1_r3/Snap-97145-Image Export-35.tif	1	TRUE	857.111
EG4725	d1	r3	../EG4725_d1_r3/Snap-97147-Image Export-37.tif	0	TRUE	862.068
EG4725	d1	r3	../EG4725_d1_r3/Snap-97147-Image Export-37.tif	1	TRUE	803.715
EG4725	d1	r3	../EG4725_d1_r3/Snap-97126-Image Export-16.tif	0	TRUE	827.464
EG4725	d1	r3	../EG4725_d1_r3/Snap-97127-Image Export-17.tif	0	TRUE	830.053
EG4725	d1	r3	../EG4725_d1_r3/Snap-97155-Image Export-45.tif	0	TRUE	846.402
EG4725	d1	r3	../EG4725_d1_r3/Snap-97155-Image Export-45.tif	1	TRUE	826.445
EG4725	d1	r3	../EG4725_d1_r3/Snap-97155-Image Export-45.tif	2	TRUE	881.358
EG4725	d1	r3	../EG4725_d1_r3/Snap-97124-Image Export-14.tif	0	TRUE	853.411
EG4725	d1	r3	../EG4725_d1_r3/Snap-97124-Image Export-14.tif	1	TRUE	839.392
EG4725	d1	r3	../EG4725_d1_r3/Snap-97125-Image Export-15.tif	0	TRUE	812.778
EG4725	d1	r3	../EG4725_d1_r3/Snap-97153-Image Export-43.tif	0	TRUE	803.846
EG4725	d1	r3	../EG4725_d1_r3/Snap-97123-Image Export-13.tif	0	TRUE	791.971
EG4725	d1	r3	../EG4725_d1_r3/Snap-97151-Image Export-41.tif	0	TRUE	775.899
EG4725	d1	r3	../EG4725_d1_r3/Snap-97151-Image Export-41.tif	1	TRUE	866.006
EG4725	d1	r3	../EG4725_d1_r3/Snap-97151-Image Export-41.tif	2	TRUE	626.849
EG4725	d1	r3	../EG4725_d1_r3/Snap-97150-Image Export-40.tif	0	TRUE	873.682
EG4725	d1	r3	../EG4725_d1_r3/Snap-97118-Image Export-08.tif	0	TRUE	778.488
EG4725	d1	r3	../EG4725_d1_r3/Snap-97119-Image Export-09.tif	0	TRUE	874.621
EG4725	d1	r4	../EG4725_d1_r4/Snap-97407-Image Export-37.tif	0	TRUE	823.764
EG4725	d1	r4	../EG4725_d1_r4/Snap-97407-Image Export-37.tif	1	TRUE	836.803
EG4725	d1	r4	../EG4725_d1_r4/Snap-97406-Image Export-36.tif	0	TRUE	868.503
EG4725	d1	r4	../EG4725_d1_r4/Snap-97405-Image Export-35.tif	0	TRUE	860.643
EG4725	d1	r4	../EG4725_d1_r4/Snap-97404-Image Export-34.tif	2	TRUE	818.179
EG4725	d1	r4	../EG4725_d1_r4/Snap-97404-Image Export-34.tif	3	TRUE	878.324
EG4725	d1	r4	../EG4725_d1_r4/Snap-97403-Image Export-33.tif	0	TRUE	857.295
EG4725	d1	r4	../EG4725_d1_r4/Snap-97388-Image Export-18.tif	0	TRUE	911.634
EG4725	d1	r4	../EG4725_d1_r4/Snap-97402-Image Export-32.tif	0	TRUE	857.165
EG4725	d1	r4	../EG4725_d1_r4/Snap-97402-Image Export-32.tif	2	TRUE	771.256
EG4725	d1	r4	../EG4725_d1_r4/Snap-97389-Image Export-19.tif	0	TRUE	902.035
EG4725	d1	r4	../EG4725_d1_r4/Snap-97389-Image Export-19.tif	1	TRUE	752.411
EG4725	d1	r4	../EG4725_d1_r4/Snap-97401-Image Export-31.tif	0	TRUE	889.088
EG4725	d1	r4	../EG4725_d1_r4/Snap-97401-Image Export-31.tif	1	TRUE	882.431
EG4725	d1	r4	../EG4725_d1_r4/Snap-97400-Image Export-30.tif	0	TRUE	848.807
EG4725	d1	r4	../EG4725_d1_r4/Snap-97400-Image Export-30.tif	1	TRUE	864.083
EG4725	d1	r4	../EG4725_d1_r4/Snap-97411-Image Export-41.tif	0	TRUE	836.803
EG4725	d1	r4	../EG4725_d1_r4/Snap-97411-Image Export-41.tif	1	TRUE	839.928
EG4725	d1	r4	../EG4725_d1_r4/Snap-97390-Image Export-20.tif	0	TRUE	769.962
EG4725	d1	r4	../EG4725_d1_r4/Snap-97390-Image Export-20.tif	1	TRUE	861.808
EG4725	d1	r4	../EG4725_d1_r4/Snap-97390-Image Export-20.tif	2	TRUE	850.416
EG4725	d1	r4	../EG4725_d1_r4/Snap-97410-Image Export-40.tif	0	TRUE	896.542
EG4725	d1	r4	../EG4725_d1_r4/Snap-97410-Image Export-40.tif	1	TRUE	898.059
EG4725	d1	r4	../EG4725_d1_r4/Snap-97410-Image Export-40.tif	2	TRUE	860.957
EG4725	d1	r4	../EG4725_d1_r4/Snap-97391-Image Export-21.tif	0	TRUE	852.653
EG4725	d1	r4	../EG4725_d1_r4/Snap-97391-Image Export-21.tif	1	TRUE	785.406
EG4725	d1	r4	../EG4725_d1_r4/Snap-97413-Image Export-43.tif	0	TRUE	923.6
EG4725	d1	r4	../EG4725_d1_r4/Snap-97413-Image Export-43.tif	1	TRUE	751.338
EG4725	d1	r4	../EG4725_d1_r4/Snap-97413-Image Export-43.tif	2	TRUE	844.387
EG4725	d1	r4	../EG4725_d1_r4/Snap-97392-Image Export-22.tif	0	TRUE	834.788
EG4725	d1	r4	../EG4725_d1_r4/Snap-97392-Image Export-22.tif	1	TRUE	778.212
EG4725	d1	r4	../EG4725_d1_r4/Snap-97412-Image Export-42.tif	0	TRUE	815.145
EG4725	d1	r4	../EG4725_d1_r4/Snap-97412-Image Export-42.tif	1	TRUE	827.112
EG4725	d1	r4	../EG4725_d1_r4/Snap-97412-Image Export-42.tif	2	TRUE	664.709
EG4725	d1	r4	../EG4725_d1_r4/Snap-97394-Image Export-24.tif	0	TRUE	872.165
EG4725	d1	r4	../EG4725_d1_r4/Snap-97378-Image Export-08.tif	1	TRUE	860.291
EG4725	d1	r4	../EG4725_d1_r4/Snap-97415-Image Export-45.tif	0	TRUE	823.228
EG4725	d1	r4	../EG4725_d1_r4/Snap-97379-Image Export-09.tif	0	TRUE	837.469
EG4725	d1	r4	../EG4725_d1_r4/Snap-97396-Image Export-26.tif	0	TRUE	810.633
EG4725	d1	r4	../EG4725_d1_r4/Snap-97417-Image Export-47.tif	1	TRUE	885.242
EG4725	d1	r4	../EG4725_d1_r4/Snap-97417-Image Export-47.tif	2	TRUE	805.991
EG4725	d1	r4	../EG4725_d1_r4/Snap-97417-Image Export-47.tif	3	TRUE	761.343
EG4725	d1	r4	../EG4725_d1_r4/Snap-97397-Image Export-27.tif	0	TRUE	766.652
EG4725	d1	r4	../EG4725_d1_r4/Snap-97397-Image Export-27.tif	1	TRUE	851.933
EG4725	d1	r4	../EG4725_d1_r4/Snap-97416-Image Export-46.tif	0	TRUE	857.832
EG4725	d1	r4	../EG4725_d1_r4/Snap-97431-Image Export-61.tif	0	TRUE	754.556
EG4725	d1	r4	../EG4725_d1_r4/Snap-97430-Image Export-60.tif	0	TRUE	845.996
EG4725	d1	r4	../EG4725_d1_r4/Snap-97433-Image Export-63.tif	0	TRUE	893.194
EG4725	d1	r4	../EG4725_d1_r4/Snap-97448-Image Export-78.tif	0	TRUE	842.832
EG4725	d1	r4	../EG4725_d1_r4/Snap-97448-Image Export-78.tif	1	TRUE	863.233
EG4725	d1	r4	../EG4725_d1_r4/Snap-97448-Image Export-78.tif	2	TRUE	783.759
EG4725	d1	r4	../EG4725_d1_r4/Snap-97432-Image Export-62.tif	0	TRUE	796.484
EG4725	d1	r4	../EG4725_d1_r4/Snap-97432-Image Export-62.tif	1	TRUE	912.576
EG4725	d1	r4	../EG4725_d1_r4/Snap-97449-Image Export-79.tif	0	TRUE	787.015
EG4725	d1	r4	../EG4725_d1_r4/Snap-97449-Image Export-79.tif	1	TRUE	854.04
EG4725	d1	r4	../EG4725_d1_r4/Snap-97435-Image Export-65.tif	0	TRUE	884.131
EG4725	d1	r4	../EG4725_d1_r4/Snap-97435-Image Export-65.tif	1	TRUE	893.194
EG4725	d1	r4	../EG4725_d1_r4/Snap-97435-Image Export-65.tif	2	TRUE	881.672
EG4725	d1	r4	../EG4725_d1_r4/Snap-97434-Image Export-64.tif	0	TRUE	863.325
EG4725	d1	r4	../EG4725_d1_r4/Snap-97437-Image Export-67.tif	0	TRUE	793.044
EG4725	d1	r4	../EG4725_d1_r4/Snap-97437-Image Export-67.tif	1	TRUE	814.831
EG4725	d1	r4	../EG4725_d1_r4/Snap-97436-Image Export-66.tif	0	TRUE	853.097
EG4725	d1	r4	../EG4725_d1_r4/Snap-97436-Image Export-66.tif	1	TRUE	850.378
EG4725	d1	r4	../EG4725_d1_r4/Snap-97436-Image Export-66.tif	2	TRUE	746.067
EG4725	d1	r4	../EG4725_d1_r4/Snap-97436-Image Export-66.tif	3	TRUE	838.412
EG4725	d1	r4	../EG4725_d1_r4/Snap-97436-Image Export-66.tif	4	TRUE	881.58
EG4725	d1	r4	../EG4725_d1_r4/Snap-97452-Image Export-82.tif	1	TRUE	884.262
EG4725	d1	r4	../EG4725_d1_r4/Snap-97452-Image Export-82.tif	3	TRUE	856.537
EG4725	d1	r4	../EG4725_d1_r4/Snap-97452-Image Export-82.tif	4	TRUE	838.005
EG4725	d1	r4	../EG4725_d1_r4/Snap-97452-Image Export-82.tif	5	TRUE	826.89
EG4725	d1	r4	../EG4725_d1_r4/Snap-97453-Image Export-83.tif	1	TRUE	851.895
EG4725	d1	r4	../EG4725_d1_r4/Snap-97453-Image Export-83.tif	2	TRUE	838.135
EG4725	d1	r4	../EG4725_d1_r4/Snap-97453-Image Export-83.tif	3	TRUE	812.15
EG4725	d1	r4	../EG4725_d1_r4/Snap-97450-Image Export-80.tif	0	TRUE	813.314
EG4725	d1	r4	../EG4725_d1_r4/Snap-97450-Image Export-80.tif	1	TRUE	828.222
EG4725	d1	r4	../EG4725_d1_r4/Snap-97450-Image Export-80.tif	3	TRUE	835.546
EG4725	d1	r4	../EG4725_d1_r4/Snap-97450-Image Export-80.tif	4	TRUE	854.576
EG4725	d1	r4	../EG4725_d1_r4/Snap-97450-Image Export-80.tif	5	TRUE	758.754
EG4725	d1	r4	../EG4725_d1_r4/Snap-97450-Image Export-80.tif	6	TRUE	864.749
EG4725	d1	r4	../EG4725_d1_r4/Snap-97451-Image Export-81.tif	2	TRUE	812.464
EG4725	d1	r4	../EG4725_d1_r4/Snap-97451-Image Export-81.tif	4	TRUE	865.508
EG4725	d1	r4	../EG4725_d1_r4/Snap-97456-Image Export-86.tif	1	TRUE	772.589
EG4725	d1	r4	../EG4725_d1_r4/Snap-97456-Image Export-86.tif	2	TRUE	865.286
EG4725	d1	r4	../EG4725_d1_r4/Snap-97456-Image Export-86.tif	3	TRUE	776.879
EG4725	d1	r4	../EG4725_d1_r4/Snap-97456-Image Export-86.tif	4	TRUE	802.957
EG4725	d1	r4	../EG4725_d1_r4/Snap-97429-Image Export-59.tif	0	TRUE	744.459
EG4725	d1	r4	../EG4725_d1_r4/Snap-97428-Image Export-58.tif	0	TRUE	839.078
EG4725	d1	r4	../EG4725_d1_r4/Snap-97457-Image Export-87.tif	0	TRUE	870.02
EG4725	d1	r4	../EG4725_d1_r4/Snap-97457-Image Export-87.tif	1	TRUE	801.884
EG4725	d1	r4	../EG4725_d1_r4/Snap-97457-Image Export-87.tif	2	TRUE	844.755
EG4725	d1	r4	../EG4725_d1_r4/Snap-97454-Image Export-84.tif	0	TRUE	714.275
EG4725	d1	r4	../EG4725_d1_r4/Snap-97454-Image Export-84.tif	1	TRUE	784.241
EG4725	d1	r4	../EG4725_d1_r4/Snap-97454-Image Export-84.tif	3	TRUE	954.32
EG4725	d1	r4	../EG4725_d1_r4/Snap-97455-Image Export-85.tif	0	TRUE	840.557
EG4725	d1	r4	../EG4725_d1_r4/Snap-97455-Image Export-85.tif	1	TRUE	898.817
EG4725	d1	r4	../EG4725_d1_r4/Snap-97455-Image Export-85.tif	2	TRUE	828.184
EG4725	d1	r4	../EG4725_d1_r4/Snap-97381-Image Export-11.tif	0	TRUE	789.252
EG4725	d1	r4	../EG4725_d1_r4/Snap-97381-Image Export-11.tif	1	TRUE	871.851
EG4725	d1	r4	../EG4725_d1_r4/Snap-97380-Image Export-10.tif	0	TRUE	829.701
EG4725	d1	r4	../EG4725_d1_r4/Snap-97380-Image Export-10.tif	1	TRUE	853.986
EG4725	d1	r4	../EG4725_d1_r4/Snap-97383-Image Export-13.tif	1	TRUE	857.518
EG4725	d1	r4	../EG4725_d1_r4/Snap-97408-Image Export-38.tif	0	TRUE	836.711
EG4725	d1	r4	../EG4725_d1_r4/Snap-97408-Image Export-38.tif	1	TRUE	831.754
EG4725	d1	r4	../EG4725_d1_r4/Snap-97408-Image Export-38.tif	2	TRUE	814.517
EG4725	d1	r4	../EG4725_d1_r4/Snap-97408-Image Export-38.tif	3	TRUE	827.242
EG4725	d1	r4	../EG4725_d1_r4/Snap-97382-Image Export-12.tif	0	TRUE	828.72
EG4725	d1	r4	../EG4725_d1_r4/Snap-97409-Image Export-39.tif	1	TRUE	874.755
EG4725	d1	r4	../EG4725_d1_r4/Snap-97409-Image Export-39.tif	2	TRUE	885.426
EG4725	d1	r4	../EG4725_d1_r4/Snap-97385-Image Export-15.tif	1	TRUE	614.255
EG4725	d1	r4	../EG4725_d1_r4/Snap-97385-Image Export-15.tif	2	TRUE	857.426
EG4725	d1	r4	../EG4725_d1_r4/Snap-97385-Image Export-15.tif	3	TRUE	869.928
EG4725	d1	r4	../EG4725_d1_r4/Snap-97385-Image Export-15.tif	4	TRUE	799.425
EG4725	d1	r4	../EG4725_d1_r4/Snap-97384-Image Export-14.tif	0	TRUE	914.407
EG4725	d1	r4	../EG4725_d1_r4/Snap-97384-Image Export-14.tif	1	TRUE	828.092
EG4725	d1	r4	../EG4725_d1_r4/Snap-97384-Image Export-14.tif	2	TRUE	855.02
EG4725	d1	r4	../EG4725_d1_r4/Snap-97384-Image Export-14.tif	3	TRUE	863.417
EG4725	d1	r4	../EG4725_d1_r4/Snap-97384-Image Export-14.tif	4	TRUE	844.885
EG4725	d1	r4	../EG4725_d1_r4/Snap-97387-Image Export-17.tif	1	TRUE	809.875
EG4725	d1	r4	../EG4725_d1_r4/Snap-97387-Image Export-17.tif	2	TRUE	839.057
EG4725	d1	r4	../EG4725_d1_r4/Snap-97386-Image Export-16.tif	1	TRUE	874.885
EG4725	d1	r4	../EG4725_d1_r4/Snap-97373-Image Export-03.tif	0	TRUE	883.817
EG4725	d1	r4	../EG4725_d1_r4/Snap-97375-Image Export-05.tif	0	TRUE	755.314
EG4725	d1	r4	../EG4725_d1_r4/Snap-97399-Image Export-29.tif	1	TRUE	851.58
EG4725	d1	r4	../EG4725_d1_r4/Snap-97374-Image Export-04.tif	0	TRUE	837.691
EG4725	d1	r4	../EG4725_d1_r4/Snap-97419-Image Export-49.tif	0	TRUE	721.691
EG4725	d1	r4	../EG4725_d1_r4/Snap-97419-Image Export-49.tif	1	TRUE	843.184
EG4725	d1	r4	../EG4725_d1_r4/Snap-97398-Image Export-28.tif	0	TRUE	855.15
EG4725	d1	r4	../EG4725_d1_r4/Snap-97377-Image Export-07.tif	0	TRUE	796.522
EG4725	d1	r4	../EG4725_d1_r4/Snap-97377-Image Export-07.tif	1	TRUE	890.069
EG4725	d1	r4	../EG4725_d1_r4/Snap-97377-Image Export-07.tif	2	TRUE	892.88
EG4725	d1	r4	../EG4725_d1_r4/Snap-97376-Image Export-06.tif	0	TRUE	794.469
EG4725	d1	r4	../EG4725_d1_r4/Snap-97376-Image Export-06.tif	1	TRUE	793.358
EG4725	d1	r4	../EG4725_d1_r4/Snap-97447-Image Export-77.tif	0	TRUE	790.362
EG4725	d1	r4	../EG4725_d1_r4/Snap-97447-Image Export-77.tif	1	TRUE	848.141
EG4725	d1	r4	../EG4725_d1_r4/Snap-97446-Image Export-76.tif	0	TRUE	838.45
EG4725	d1	r4	../EG4725_d1_r4/Snap-97446-Image Export-76.tif	1	TRUE	912.04
EG4725	d1	r4	../EG4725_d1_r4/Snap-97446-Image Export-76.tif	2	TRUE	826.445
EG4725	d1	r4	../EG4725_d1_r4/Snap-97445-Image Export-75.tif	0	TRUE	859.755
EG4725	d1	r4	../EG4725_d1_r4/Snap-97445-Image Export-75.tif	1	TRUE	822.469
EG4725	d1	r4	../EG4725_d1_r4/Snap-97445-Image Export-75.tif	2	TRUE	893.953
EG4725	d1	r4	../EG4725_d1_r4/Snap-97444-Image Export-74.tif	0	TRUE	909.489
EG4725	d1	r4	../EG4725_d1_r4/Snap-97444-Image Export-74.tif	2	TRUE	894.581
EG4725	d1	r4	../EG4725_d1_r4/Snap-97444-Image Export-74.tif	3	TRUE	881.672
EG4725	d1	r4	../EG4725_d1_r4/Snap-97444-Image Export-74.tif	4	TRUE	568.497
EG4725	d1	r4	../EG4725_d1_r4/Snap-97438-Image Export-68.tif	1	TRUE	816.57
EG4725	d1	r4	../EG4725_d1_r4/Snap-97438-Image Export-68.tif	2	TRUE	714.681
EG4725	d1	r4	../EG4725_d1_r4/Snap-97443-Image Export-73.tif	1	TRUE	800.184
EG4725	d1	r4	../EG4725_d1_r4/Snap-97443-Image Export-73.tif	2	TRUE	820.73
EG4725	d1	r4	../EG4725_d1_r4/Snap-97439-Image Export-69.tif	0	TRUE	823.228
EG4725	d1	r4	../EG4725_d1_r4/Snap-97439-Image Export-69.tif	1	TRUE	691.729
EG4725	d1	r4	../EG4725_d1_r4/Snap-97439-Image Export-69.tif	3	TRUE	910.079
EG4725	d1	r4	../EG4725_d1_r4/Snap-97442-Image Export-72.tif	0	TRUE	859.126
EG4725	d1	r4	../EG4725_d1_r4/Snap-97442-Image Export-72.tif	1	TRUE	861.9
EG4725	d1	r4	../EG4725_d1_r4/Snap-97442-Image Export-72.tif	5	TRUE	716.068
EG4725	d1	r4	../EG4725_d1_r4/Snap-97441-Image Export-71.tif	1	TRUE	847.696
EG4725	d1	r4	../EG4725_d1_r4/Snap-97441-Image Export-71.tif	3	TRUE	824.43
EG4725	d1	r4	../EG4725_d1_r4/Snap-97440-Image Export-70.tif	1	TRUE	907.528
EG4725	d1	r4	../EG4725_d1_r4/Snap-97440-Image Export-70.tif	2	TRUE	876.716
EG4725	d1	r4	../EG4725_d1_r4/Snap-97440-Image Export-70.tif	3	TRUE	914.982
EG4725	d1	r4	../EG4725_d1_r4/Snap-97440-Image Export-70.tif	4	TRUE	751.338
EG4725	d1	r4	../EG4725_d1_r4/Snap-97420-Image Export-50.tif	0	TRUE	897.17
EG4725	d1	r4	../EG4725_d1_r4/Snap-97420-Image Export-50.tif	1	TRUE	842.832
EG4725	d1	r4	../EG4725_d1_r4/Snap-97420-Image Export-50.tif	2	TRUE	864.397
EG4725	d1	r4	../EG4725_d1_r4/Snap-97421-Image Export-51.tif	1	TRUE	823.358
EG4725	d1	r4	../EG4725_d1_r4/Snap-97421-Image Export-51.tif	2	TRUE	819.696
EG4725	d1	r4	../EG4725_d1_r4/Snap-97422-Image Export-52.tif	2	TRUE	889.532
EG4725	d1	r4	../EG4725_d1_r4/Snap-97423-Image Export-53.tif	0	TRUE	843.092
EG4725	d1	r4	../EG4725_d1_r4/Snap-97424-Image Export-54.tif	0	TRUE	888.774
EG4725	d1	r4	../EG4725_d1_r4/Snap-97425-Image Export-55.tif	0	TRUE	739.908
EG4725	d1	r4	../EG4725_d1_r4/Snap-97426-Image Export-56.tif	0	TRUE	819.566
EG4725	d1	r4	../EG4725_d1_r4/Snap-97427-Image Export-57.tif	0	TRUE	813.537
EG4725	d1	r4	../EG4725_d1_r4/Snap-97458-Image Export-88.tif	0	TRUE	859.218
LRB395	d1	r3	../LRB395_d1_r3/Snap-97032-Image Export-48.tif	0	TRUE	910.561
LRB395	d1	r3	../LRB395_d1_r3/Snap-97032-Image Export-48.tif	1	TRUE	815.145
LRB395	d1	r3	../LRB395_d1_r3/Snap-97032-Image Export-48.tif	2	TRUE	905.605
LRB395	d1	r3	../LRB395_d1_r3/Snap-97032-Image Export-48.tif	3	TRUE	826.483
LRB395	d1	r3	../LRB395_d1_r3/Snap-97011-Image Export-27.tif	0	TRUE	802.551
LRB395	d1	r3	../LRB395_d1_r3/Snap-97011-Image Export-27.tif	1	TRUE	825.633
LRB395	d1	r3	../LRB395_d1_r3/Snap-97033-Image Export-49.tif	1	TRUE	813.721
LRB395	d1	r3	../LRB395_d1_r3/Snap-97033-Image Export-49.tif	2	TRUE	893.73
LRB395	d1	r3	../LRB395_d1_r3/Snap-97010-Image Export-26.tif	1	TRUE	839.3
LRB395	d1	r3	../LRB395_d1_r3/Snap-97010-Image Export-26.tif	2	TRUE	813
LRB395	d1	r3	../LRB395_d1_r3/Snap-97009-Image Export-25.tif	0	TRUE	879.527
LRB395	d1	r3	../LRB395_d1_r3/Snap-97008-Image Export-24.tif	0	TRUE	800.628
LRB395	d1	r3	../LRB395_d1_r3/Snap-97008-Image Export-24.tif	1	TRUE	894.137
LRB395	d1	r3	../LRB395_d1_r3/Snap-97008-Image Export-24.tif	2	TRUE	871.407
LRB395	d1	r3	../LRB395_d1_r3/Snap-97008-Image Export-24.tif	3	TRUE	678.024
LRB395	d1	r3	../LRB395_d1_r3/Snap-97015-Image Export-31.tif	0	TRUE	795.227
LRB395	d1	r3	../LRB395_d1_r3/Snap-97015-Image Export-31.tif	1	TRUE	817.513
LRB395	d1	r3	../LRB395_d1_r3/Snap-97014-Image Export-30.tif	0	TRUE	819.658
LRB395	d1	r3	../LRB395_d1_r3/Snap-97014-Image Export-30.tif	1	TRUE	746.29
LRB395	d1	r3	../LRB395_d1_r3/Snap-97053-Image Export-69.tif	2	TRUE	898.503
LRB395	d1	r3	../LRB395_d1_r3/Snap-97053-Image Export-69.tif	3	TRUE	777.01
LRB395	d1	r3	../LRB395_d1_r3/Snap-97053-Image Export-69.tif	4	TRUE	726.425
LRB395	d1	r3	../LRB395_d1_r3/Snap-97017-Image Export-33.tif	4	TRUE	825.687
LRB395	d1	r3	../LRB395_d1_r3/Snap-97022-Image Export-38.tif	0	TRUE	755.314
LRB395	d1	r3	../LRB395_d1_r3/Snap-97022-Image Export-38.tif	1	TRUE	712.536
LRB395	d1	r3	../LRB395_d1_r3/Snap-97022-Image Export-38.tif	2	TRUE	808.71
LRB395	d1	r3	../LRB395_d1_r3/Snap-97052-Image Export-68.tif	0	TRUE	827.242
LRB395	d1	r3	../LRB395_d1_r3/Snap-97052-Image Export-68.tif	3	TRUE	747.048
LRB395	d1	r3	../LRB395_d1_r3/Snap-97052-Image Export-68.tif	5	TRUE	865.025
LRB395	d1	r3	../LRB395_d1_r3/Snap-97023-Image Export-39.tif	0	TRUE	795.633
LRB395	d1	r3	../LRB395_d1_r3/Snap-97023-Image Export-39.tif	1	TRUE	876.716
LRB395	d1	r3	../LRB395_d1_r3/Snap-97023-Image Export-39.tif	2	TRUE	873.812
LRB395	d1	r3	../LRB395_d1_r3/Snap-97007-Image Export-23.tif	1	TRUE	808.71
LRB395	d1	r3	../LRB395_d1_r3/Snap-97007-Image Export-23.tif	3	TRUE	818.807
LRB395	d1	r3	../LRB395_d1_r3/Snap-97007-Image Export-23.tif	4	TRUE	785.092
LRB395	d1	r3	../LRB395_d1_r3/Snap-97006-Image Export-22.tif	0	TRUE	827.87
LRB395	d1	r3	../LRB395_d1_r3/Snap-97006-Image Export-22.tif	1	TRUE	876.049
LRB395	d1	r3	../LRB395_d1_r3/Snap-97006-Image Export-22.tif	2	TRUE	827.02
LRB395	d1	r3	../LRB395_d1_r3/Snap-97005-Image Export-21.tif	0	TRUE	769.648
LRB395	d1	r3	../LRB395_d1_r3/Snap-97002-Image Export-18.tif	0	TRUE	853.005
LRB395	d1	r3	../LRB395_d1_r3/Snap-97004-Image Export-20.tif	0	TRUE	911.948
LRB395	d1	r3	../LRB395_d1_r3/Snap-97004-Image Export-20.tif	1	TRUE	818.845
LRB395	d1	r3	../LRB395_d1_r3/Snap-97040-Image Export-56.tif	1	TRUE	785.406
LRB395	d1	r3	../LRB395_d1_r3/Snap-97040-Image Export-56.tif	2	TRUE	823.32
LRB395	d1	r3	../LRB395_d1_r3/Snap-97040-Image Export-56.tif	3	TRUE	790.585
LRB395	d1	r3	../LRB395_d1_r3/Snap-97040-Image Export-56.tif	4	TRUE	782.594
LRB395	d1	r3	../LRB395_d1_r3/Snap-97041-Image Export-57.tif	0	TRUE	811.576
LRB395	d1	r3	../LRB395_d1_r3/Snap-97041-Image Export-57.tif	1	TRUE	780.005
LRB395	d1	r3	../LRB395_d1_r3/Snap-96993-Image Export-09.tif	0	TRUE	893.286
LRB395	d1	r3	../LRB395_d1_r3/Snap-97019-Image Export-35.tif	0	TRUE	920.697
LRB395	d1	r3	../LRB395_d1_r3/Snap-97019-Image Export-35.tif	1	TRUE	807.507
LRB395	d1	r3	../LRB395_d1_r3/Snap-97019-Image Export-35.tif	2	TRUE	774.826
LRB395	d1	r3	../LRB395_d1_r3/Snap-97019-Image Export-35.tif	3	TRUE	918.459
LRB395	d1	r3	../LRB395_d1_r3/Snap-97018-Image Export-34.tif	0	TRUE	799.517
LRB395	d1	r3	../LRB395_d1_r3/Snap-97018-Image Export-34.tif	1	TRUE	720.488
LRB395	d1	r3	../LRB395_d1_r3/Snap-97018-Image Export-34.tif	2	TRUE	801.7
LRB395	d1	r3	../LRB395_d1_r3/Snap-97038-Image Export-54.tif	0	TRUE	862.658
LRB395	d1	r3	../LRB395_d1_r3/Snap-97038-Image Export-54.tif	1	TRUE	881.358
LRB395	d1	r3	../LRB395_d1_r3/Snap-97038-Image Export-54.tif	2	TRUE	820.991
LRB395	d1	r3	../LRB395_d1_r3/Snap-97039-Image Export-55.tif	1	TRUE	807.691
LRB395	d1	r3	../LRB395_d1_r3/Snap-97039-Image Export-55.tif	2	TRUE	814.961
LRB395	d1	r3	../LRB395_d1_r3/Snap-96991-Image Export-07.tif	1	TRUE	803.493
LRB395	d1	r3	../LRB395_d1_r3/Snap-96990-Image Export-06.tif	0	TRUE	878.194
LRB395	d1	r3	../LRB395_d1_r3/Snap-97047-Image Export-63.tif	2	TRUE	898.151
LRB395	d1	r3	../LRB395_d1_r3/Snap-97047-Image Export-63.tif	3	TRUE	417.708
LRB395	d1	r3	../LRB395_d1_r3/Snap-97046-Image Export-62.tif	0	TRUE	787.865
LRB395	d1	r3	../LRB395_d1_r3/Snap-97046-Image Export-62.tif	1	TRUE	691.507
LRB395	d1	r3	../LRB395_d1_r3/Snap-97046-Image Export-62.tif	2	TRUE	891.493
LRB395	d1	r3	../LRB395_d1_r3/Snap-96989-Image Export-05.tif	0	TRUE	897.837
LRB395	d1	r3	../LRB395_d1_r3/Snap-96989-Image Export-05.tif	1	TRUE	799.333
LRB395	d1	r3	../LRB395_d1_r3/Snap-96989-Image Export-05.tif	3	TRUE	868.189
LRB395	d1	r3	../LRB395_d1_r3/Snap-97045-Image Export-61.tif	1	TRUE	810.855
LRB395	d1	r3	../LRB395_d1_r3/Snap-97045-Image Export-61.tif	2	TRUE	782.464
LRB395	d1	r3	../LRB395_d1_r3/Snap-96988-Image Export-04.tif	1	TRUE	886.499
LRB395	d1	r3	../LRB395_d1_r3/Snap-96988-Image Export-04.tif	2	TRUE	831.884
LRB395	d1	r3	../LRB395_d1_r3/Snap-96988-Image Export-04.tif	3	TRUE	847.919
LRB395	d1	r3	../LRB395_d1_r3/Snap-97044-Image Export-60.tif	0	TRUE	832.474
LRB395	d1	r3	../LRB395_d1_r3/Snap-97044-Image Export-60.tif	1	TRUE	821.619
LRB395	d1	r3	../LRB395_d1_r3/Snap-97043-Image Export-59.tif	0	TRUE	745.623
LRB395	d1	r3	../LRB395_d1_r3/Snap-97043-Image Export-59.tif	1	TRUE	810.411
LRB395	d1	r3	../LRB395_d1_r3/Snap-97000-Image Export-16.tif	0	TRUE	925.745
LRB395	d1	r3	../LRB395_d1_r3/Snap-97024-Image Export-40.tif	0	TRUE	788.624
LRB395	d1	r3	../LRB395_d1_r3/Snap-97001-Image Export-17.tif	0	TRUE	738.299
LRB395	d1	r3	../LRB395_d1_r3/Snap-97001-Image Export-17.tif	1	TRUE	949.9
LRB395	d1	r3	../LRB395_d1_r3/Snap-97025-Image Export-41.tif	0	TRUE	894.933
LRB395	d1	r3	../LRB395_d1_r3/Snap-97027-Image Export-43.tif	0	TRUE	803.585
LRB395	d1	r3	../LRB395_d1_r3/Snap-97027-Image Export-43.tif	1	TRUE	672.623
LRB395	d1	r3	../LRB395_d1_r3/Snap-97027-Image Export-43.tif	2	TRUE	779.469
LRB395	d1	r3	../LRB395_d1_r3/Snap-96997-Image Export-13.tif	0	TRUE	777.01
LRB395	d1	r3	../LRB395_d1_r3/Snap-96997-Image Export-13.tif	1	TRUE	847.788
LRB395	d1	r3	../LRB395_d1_r3/Snap-96997-Image Export-13.tif	2	TRUE	859.663
LRB395	d1	r3	../LRB395_d1_r3/Snap-96996-Image Export-12.tif	0	TRUE	812.242
LRB395	d1	r3	../LRB395_d1_r3/Snap-96996-Image Export-12.tif	1	TRUE	856.353
LRB395	d1	r3	../LRB395_d1_r3/Snap-96995-Image Export-11.tif	0	TRUE	781.652
LRB395	d1	r3	../LRB395_d1_r3/Snap-96994-Image Export-10.tif	0	TRUE	847.474
LRB395	d1	r3	../LRB395_d1_r3/Snap-97020-Image Export-36.tif	0	TRUE	808.764
LRB395	d1	r3	../LRB395_d1_r3/Snap-97020-Image Export-36.tif	1	TRUE	843.942
LRB395	d1	r3	../LRB395_d1_r3/Snap-97020-Image Export-36.tif	2	TRUE	838.005
LRB395	d1	r3	../LRB395_d1_r3/Snap-97051-Image Export-67.tif	0	TRUE	772.237
LRB395	d1	r3	../LRB395_d1_r3/Snap-97051-Image Export-67.tif	2	TRUE	885.242
LRB395	d1	r3	../LRB395_d1_r3/Snap-97036-Image Export-52.tif	0	TRUE	783.353
LRB395	d1	r3	../LRB395_d1_r3/Snap-97021-Image Export-37.tif	0	TRUE	795.633
LRB395	d1	r3	../LRB395_d1_r3/Snap-97050-Image Export-66.tif	0	TRUE	846.846
LRB395	d1	r3	../LRB395_d1_r3/Snap-97050-Image Export-66.tif	1	TRUE	909.711
LRB395	d1	r3	../LRB395_d1_r3/Snap-97050-Image Export-66.tif	2	TRUE	835.86
LRB395	d1	r3	../LRB395_d1_r3/Snap-97050-Image Export-66.tif	3	TRUE	773.31
LRB395	d1	r3	../LRB395_d1_r3/Snap-97037-Image Export-53.tif	0	TRUE	838.135
LRB395	d1	r3	../LRB395_d1_r3/Snap-97037-Image Export-53.tif	1	TRUE	820.102
LRB395	d1	r3	../LRB395_d1_r3/Snap-97037-Image Export-53.tif	3	TRUE	776.787
LRB395	d1	r3	../LRB395_d1_r3/Snap-97037-Image Export-53.tif	4	TRUE	761.657
LRB395	d1	r3	../LRB395_d1_r3/Snap-97034-Image Export-50.tif	0	TRUE	859.218
LRB395	d1	r3	../LRB395_d1_r3/Snap-97034-Image Export-50.tif	2	TRUE	903.015
LRB395	d1	r3	../LRB395_d1_r3/Snap-97035-Image Export-51.tif	1	TRUE	727.091
LRB395	d1	r3	../LRB395_d1_r3/Snap-97035-Image Export-51.tif	2	TRUE	810.151
LRB395	d1	r3	../LRB395_d1_r3/Snap-96985-Image Export-01.tif	1	TRUE	843.72
LRB395	d1	r3	../LRB395_d1_r3/Snap-96985-Image Export-01.tif	2	TRUE	842.204
LRB395	d1	r3	../LRB395_d1_r3/Snap-96985-Image Export-01.tif	3	TRUE	749.507
LRB395	d1	r3	../LRB395_d1_r3/Snap-97049-Image Export-65.tif	0	TRUE	883.725
LRB395	d1	r3	../LRB395_d1_r3/Snap-97049-Image Export-65.tif	1	TRUE	910.301
LRB395	d1	r3	../LRB395_d1_r3/Snap-97049-Image Export-65.tif	2	TRUE	872.295
LRB395	d1	r3	../LRB395_d1_r3/Snap-97049-Image Export-65.tif	3	TRUE	753.797
LRB395	d1	r3	../LRB395_d1_r3/Snap-97048-Image Export-64.tif	1	TRUE	759.865
LRB395	d1	r3	../LRB395_d1_r3/Snap-96987-Image Export-03.tif	0	TRUE	857.073
LRB395	d1	r3	../LRB395_d1_r3/Snap-96987-Image Export-03.tif	1	TRUE	829.257
LRB395	d1	r3	../LRB395_d1_r3/Snap-96987-Image Export-03.tif	2	TRUE	765.265
LRB395	d1	r3	../LRB395_d1_r3/Snap-96986-Image Export-02.tif	0	TRUE	814.701
LRB395	d1	r3	../LRB395_d1_r3/Snap-96986-Image Export-02.tif	1	TRUE	817.513
LRB395	d1	r3	../LRB395_d1_r3/Snap-97028-Image Export-44.tif	0	TRUE	825.909
LRB395	d1	r3	../LRB395_d1_r3/Snap-97028-Image Export-44.tif	1	TRUE	866.266
LRB395	d1	r3	../LRB395_d1_r3/Snap-97028-Image Export-44.tif	2	TRUE	818.363
LRB395	d1	r3	../LRB395_d1_r3/Snap-97028-Image Export-44.tif	3	TRUE	737.725
LRB395	d1	r3	../LRB395_d1_r3/Snap-97028-Image Export-44.tif	4	TRUE	885.334
LRB395	d1	r3	../LRB395_d1_r3/Snap-97029-Image Export-45.tif	0	TRUE	849.213
LRB395	d1	r3	../LRB395_d1_r3/Snap-97029-Image Export-45.tif	1	TRUE	885.556
LRB395	d1	r3	../LRB395_d1_r3/Snap-97029-Image Export-45.tif	2	TRUE	784.425
LRB395	d1	r3	../LRB395_d1_r3/Snap-96999-Image Export-15.tif	0	TRUE	795.633
LRB395	d1	r3	../LRB395_d1_r3/Snap-96999-Image Export-15.tif	1	TRUE	666.28
LRB395	d1	r3	../LRB395_d1_r3/Snap-97055-Image Export-71.tif	0	TRUE	842.74
LRB395	d1	r3	../LRB395_d1_r3/Snap-97055-Image Export-71.tif	1	TRUE	811.706
LRB395	d1	r3	../LRB395_d1_r3/Snap-97055-Image Export-71.tif	2	TRUE	834.121
LRB395	d1	r3	../LRB395_d1_r3/Snap-97055-Image Export-71.tif	3	TRUE	895.691
LRB395	d1	r3	../LRB395_d1_r3/Snap-96998-Image Export-14.tif	0	TRUE	778.971
LRB395	d1	r3	../LRB395_d1_r3/Snap-97054-Image Export-70.tif	1	TRUE	876.585
LRB395	d1	r3	../LRB395_d1_r3/Snap-97054-Image Export-70.tif	2	TRUE	868.948
LRB395	d1	r3	../LRB395_d1_r3/Snap-97054-Image Export-70.tif	5	TRUE	799.831
LRB395	d1	r3	../LRB395_d1_r3/Snap-97030-Image Export-46.tif	0	TRUE	781.392
LRB395	d1	r3	../LRB395_d1_r3/Snap-97013-Image Export-29.tif	0	TRUE	810.817
LRB395	d1	r3	../LRB395_d1_r3/Snap-97013-Image Export-29.tif	1	TRUE	929.315
LRB395	d1	r3	../LRB395_d1_r3/Snap-97013-Image Export-29.tif	2	TRUE	804.918
LRB395	d1	r3	../LRB395_d1_r3/Snap-97031-Image Export-47.tif	0	TRUE	794.024
LRB395	d1	r3	../LRB395_d1_r3/Snap-97031-Image Export-47.tif	1	TRUE	808.58
LRB395	d1	r3	../LRB395_d1_r3/Snap-97056-Image Export-72.tif	0	TRUE	811.614
LRB395	d1	r3	../LRB395_d1_r3/Snap-97056-Image Export-72.tif	2	TRUE	849.029
LRB395	d1	r3	../LRB395_d1_r3/Snap-97056-Image Export-72.tif	3	TRUE	838.856
LRB395	d1	r3	../LRB395_d1_r3/Snap-97056-Image Export-72.tif	4	TRUE	881.412
LRB395	d1	r3	../LRB395_d1_r3/Snap-97056-Image Export-72.tif	5	TRUE	840.817
LRB395	d1	r3	../LRB395_d1_r3/Snap-97012-Image Export-28.tif	0	TRUE	772.367
LRB395	d1	r3	../LRB395_d1_r3/Snap-97012-Image Export-28.tif	1	TRUE	854.392
LRB395	d1	r4	../LRB395_d1_r4/Snap-97331-Image Export-18.tif	0	TRUE	859.977
LRB395	d1	r4	../LRB395_d1_r4/Snap-97331-Image Export-18.tif	1	TRUE	814.739
LRB395	d1	r4	../LRB395_d1_r4/Snap-97335-Image Export-22.tif	0	TRUE	858.054
LRB395	d1	r4	../LRB395_d1_r4/Snap-97335-Image Export-22.tif	1	TRUE	874.662
LRB395	d1	r4	../LRB395_d1_r4/Snap-97332-Image Export-19.tif	3	TRUE	747.952
LRB395	d1	r4	../LRB395_d1_r4/Snap-97334-Image Export-21.tif	0	TRUE	882.078
LRB395	d1	r4	../LRB395_d1_r4/Snap-97334-Image Export-21.tif	1	TRUE	812.15
LRB395	d1	r4	../LRB395_d1_r4/Snap-97369-Image Export-56.tif	1	TRUE	797.816
LRB395	d1	r4	../LRB395_d1_r4/Snap-97333-Image Export-20.tif	0	TRUE	823.005
LRB395	d1	r4	../LRB395_d1_r4/Snap-97370-Image Export-57.tif	0	TRUE	821.711
LRB395	d1	r4	../LRB395_d1_r4/Snap-97352-Image Export-39.tif	0	TRUE	840.15
LRB395	d1	r4	../LRB395_d1_r4/Snap-97352-Image Export-39.tif	1	TRUE	769.778
LRB395	d1	r4	../LRB395_d1_r4/Snap-97352-Image Export-39.tif	2	TRUE	887.571
LRB395	d1	r4	../LRB395_d1_r4/Snap-97337-Image Export-24.tif	1	TRUE	885.112
LRB395	d1	r4	../LRB395_d1_r4/Snap-97368-Image Export-55.tif	0	TRUE	864.841
LRB395	d1	r4	../LRB395_d1_r4/Snap-97351-Image Export-38.tif	2	TRUE	816.792
LRB395	d1	r4	../LRB395_d1_r4/Snap-97351-Image Export-38.tif	3	TRUE	831.662
LRB395	d1	r4	../LRB395_d1_r4/Snap-97318-Image Export-05.tif	0	TRUE	780.541
LRB395	d1	r4	../LRB395_d1_r4/Snap-97360-Image Export-47.tif	0	TRUE	781.836
LRB395	d1	r4	../LRB395_d1_r4/Snap-97360-Image Export-47.tif	1	TRUE	794.561
LRB395	d1	r4	../LRB395_d1_r4/Snap-97360-Image Export-47.tif	2	TRUE	771.387
LRB395	d1	r4	../LRB395_d1_r4/Snap-97339-Image Export-26.tif	0	TRUE	797.594
LRB395	d1	r4	../LRB395_d1_r4/Snap-97342-Image Export-29.tif	0	TRUE	745.753
LRB395	d1	r4	../LRB395_d1_r4/Snap-97342-Image Export-29.tif	1	TRUE	828.406
LRB395	d1	r4	../LRB395_d1_r4/Snap-97341-Image Export-28.tif	0	TRUE	802.329
LRB395	d1	r4	../LRB395_d1_r4/Snap-97317-Image Export-04.tif	0	TRUE	849.121
LRB395	d1	r4	../LRB395_d1_r4/Snap-97317-Image Export-04.tif	1	TRUE	783.039
LRB395	d1	r4	../LRB395_d1_r4/Snap-97367-Image Export-54.tif	0	TRUE	798.667
LRB395	d1	r4	../LRB395_d1_r4/Snap-97367-Image Export-54.tif	1	TRUE	830.329
LRB395	d1	r4	../LRB395_d1_r4/Snap-97338-Image Export-25.tif	0	TRUE	893.638
LRB395	d1	r4	../LRB395_d1_r4/Snap-97365-Image Export-52.tif	0	TRUE	843.942
LRB395	d1	r4	../LRB395_d1_r4/Snap-97365-Image Export-52.tif	1	TRUE	852.653
LRB395	d1	r4	../LRB395_d1_r4/Snap-97321-Image Export-08.tif	0	TRUE	832.29
LRB395	d1	r4	../LRB395_d1_r4/Snap-97315-Image Export-02.tif	0	TRUE	812.334
LRB395	d1	r4	../LRB395_d1_r4/Snap-97364-Image Export-51.tif	0	TRUE	799.295
LRB395	d1	r4	../LRB395_d1_r4/Snap-97366-Image Export-53.tif	0	TRUE	833.585
LRB395	d1	r4	../LRB395_d1_r4/Snap-97366-Image Export-53.tif	1	TRUE	822.377
LRB395	d1	r4	../LRB395_d1_r4/Snap-97316-Image Export-03.tif	0	TRUE	836.895
LRB395	d1	r4	../LRB395_d1_r4/Snap-97320-Image Export-07.tif	0	TRUE	823.764
LRB395	d1	r4	../LRB395_d1_r4/Snap-97346-Image Export-33.tif	0	TRUE	790.362
LRB395	d1	r4	../LRB395_d1_r4/Snap-97346-Image Export-33.tif	1	TRUE	819.121
LRB395	d1	r4	../LRB395_d1_r4/Snap-97346-Image Export-33.tif	2	TRUE	804.604
LRB395	d1	r4	../LRB395_d1_r4/Snap-97344-Image Export-31.tif	0	TRUE	791.473
LRB395	d1	r4	../LRB395_d1_r4/Snap-97344-Image Export-31.tif	1	TRUE	803.585
LRB395	d1	r4	../LRB395_d1_r4/Snap-97323-Image Export-10.tif	0	TRUE	847.604
LRB395	d1	r4	../LRB395_d1_r4/Snap-97345-Image Export-32.tif	0	TRUE	802.421
LRB395	d1	r4	../LRB395_d1_r4/Snap-97345-Image Export-32.tif	1	TRUE	813.406
LRB395	d1	r4	../LRB395_d1_r4/Snap-97357-Image Export-44.tif	1	TRUE	560.859
LRB395	d1	r4	../LRB395_d1_r4/Snap-97357-Image Export-44.tif	2	TRUE	835.638
LRB395	d1	r4	../LRB395_d1_r4/Snap-97347-Image Export-34.tif	0	TRUE	813.851
LRB395	d1	r4	../LRB395_d1_r4/Snap-97347-Image Export-34.tif	1	TRUE	747.676
LRB395	d1	r4	../LRB395_d1_r4/Snap-97361-Image Export-48.tif	0	TRUE	708.116
LRB395	d1	r4	../LRB395_d1_r4/Snap-97361-Image Export-48.tif	1	TRUE	801.792
LRB395	d1	r4	../LRB395_d1_r4/Snap-97355-Image Export-42.tif	1	TRUE	842.296
LRB395	d1	r4	../LRB395_d1_r4/Snap-97355-Image Export-42.tif	2	TRUE	851.174
LRB395	d1	r4	../LRB395_d1_r4/Snap-97324-Image Export-11.tif	0	TRUE	862.788
LRB395	d1	r4	../LRB395_d1_r4/Snap-97343-Image Export-30.tif	0	TRUE	662.932
LRB395	d1	r4	../LRB395_d1_r4/Snap-97354-Image Export-41.tif	0	TRUE	899.89
LRB395	d1	r4	../LRB395_d1_r4/Snap-97362-Image Export-49.tif	1	TRUE	832.605
LRB395	d1	r4	../LRB395_d1_r4/Snap-97356-Image Export-43.tif	0	TRUE	832.605
LRB395	d1	r4	../LRB395_d1_r4/Snap-97356-Image Export-43.tif	2	TRUE	851.136
LRB395	d1	r4	../LRB395_d1_r4/Snap-97340-Image Export-27.tif	0	TRUE	749.821
LRB395	d1	r4	../LRB395_d1_r4/Snap-97348-Image Export-35.tif	0	TRUE	843.406
LRB395	d1	r4	../LRB395_d1_r4/Snap-97348-Image Export-35.tif	1	TRUE	765.764
LRB395	d1	r4	../LRB395_d1_r4/Snap-97349-Image Export-36.tif	0	TRUE	802.513
LRB395	d1	r4	../LRB395_d1_r4/Snap-97329-Image Export-16.tif	1	TRUE	775.493
LRB395	d1	r4	../LRB395_d1_r4/Snap-97329-Image Export-16.tif	2	TRUE	798.445
LRB395	d1	r4	../LRB395_d1_r4/Snap-97359-Image Export-46.tif	0	TRUE	856.315
LRB395	d1	r4	../LRB395_d1_r4/Snap-97359-Image Export-46.tif	1	TRUE	808.358
LRB395	d1	r4	../LRB395_d1_r4/Snap-97330-Image Export-17.tif	0	TRUE	876.846
LRB395	d1	r4	../LRB395_d1_r4/Snap-97330-Image Export-17.tif	1	TRUE	778.488
LRB395	d1	r4	../LRB395_d1_r4/Snap-97328-Image Export-15.tif	0	TRUE	771.609
LRB395	d1	r4	../LRB395_d1_r4/Snap-97358-Image Export-45.tif	0	TRUE	810.097
LRB395	d1	r4	../LRB395_d1_r4/Snap-97358-Image Export-45.tif	1	TRUE	753.353
LRB395	d1	r4	../LRB395_d1_r4/Snap-97358-Image Export-45.tif	2	TRUE	825.947
LRB396	d1	r4	../LRB396_d1_r4/Snap-97295-Image Export-61.tif	0	TRUE	895.247
LRB396	d1	r4	../LRB396_d1_r4/Snap-97295-Image Export-61.tif	1	TRUE	837.691
LRB396	d1	r4	../LRB396_d1_r4/Snap-97292-Image Export-58.tif	2	TRUE	761.604
LRB396	d1	r4	../LRB396_d1_r4/Snap-97293-Image Export-59.tif	0	TRUE	792.914
LRB396	d1	r4	../LRB396_d1_r4/Snap-97293-Image Export-59.tif	1	TRUE	919.05
LRB396	d1	r4	../LRB396_d1_r4/Snap-97293-Image Export-59.tif	2	TRUE	836.305
LRB396	d1	r4	../LRB396_d1_r4/Snap-97308-Image Export-74.tif	0	TRUE	884.262
LRB396	d1	r4	../LRB396_d1_r4/Snap-97308-Image Export-74.tif	1	TRUE	871.943
LRB396	d1	r4	../LRB396_d1_r4/Snap-97297-Image Export-63.tif	0	TRUE	858.368
LRB396	d1	r4	../LRB396_d1_r4/Snap-97238-Image Export-04.tif	0	TRUE	804.918
LRB396	d1	r4	../LRB396_d1_r4/Snap-97309-Image Export-75.tif	0	TRUE	856.001
LRB396	d1	r4	../LRB396_d1_r4/Snap-97309-Image Export-75.tif	1	TRUE	902.479
LRB396	d1	r4	../LRB396_d1_r4/Snap-97309-Image Export-75.tif	2	TRUE	840.465
LRB396	d1	r4	../LRB396_d1_r4/Snap-97296-Image Export-62.tif	0	TRUE	879.803
LRB396	d1	r4	../LRB396_d1_r4/Snap-97239-Image Export-05.tif	0	TRUE	857.924
LRB396	d1	r4	../LRB396_d1_r4/Snap-97242-Image Export-08.tif	0	TRUE	785.184
LRB396	d1	r4	../LRB396_d1_r4/Snap-97243-Image Export-09.tif	0	TRUE	820.01
LRB396	d1	r4	../LRB396_d1_r4/Snap-97310-Image Export-76.tif	0	TRUE	851.358
LRB396	d1	r4	../LRB396_d1_r4/Snap-97310-Image Export-76.tif	1	TRUE	850.86
LRB396	d1	r4	../LRB396_d1_r4/Snap-97310-Image Export-76.tif	2	TRUE	906.677
LRB396	d1	r4	../LRB396_d1_r4/Snap-97272-Image Export-38.tif	0	TRUE	871.185
LRB396	d1	r4	../LRB396_d1_r4/Snap-97273-Image Export-39.tif	0	TRUE	827.02
LRB396	d1	r4	../LRB396_d1_r4/Snap-97311-Image Export-77.tif	0	TRUE	888.146
LRB396	d1	r4	../LRB396_d1_r4/Snap-97311-Image Export-77.tif	1	TRUE	827.74
LRB396	d1	r4	../LRB396_d1_r4/Snap-97259-Image Export-25.tif	0	TRUE	865.155
LRB396	d1	r4	../LRB396_d1_r4/Snap-97258-Image Export-24.tif	0	TRUE	879.803
LRB396	d1	r4	../LRB396_d1_r4/Snap-97258-Image Export-24.tif	1	TRUE	861.31
LRB396	d1	r4	../LRB396_d1_r4/Snap-97305-Image Export-71.tif	1	TRUE	877.03
LRB396	d1	r4	../LRB396_d1_r4/Snap-97305-Image Export-71.tif	2	TRUE	867.875
LRB396	d1	r4	../LRB396_d1_r4/Snap-97306-Image Export-72.tif	1	TRUE	879.305
LRB396	d1	r4	../LRB396_d1_r4/Snap-97299-Image Export-65.tif	0	TRUE	808.894
LRB396	d1	r4	../LRB396_d1_r4/Snap-97236-Image Export-02.tif	0	TRUE	891.585
LRB396	d1	r4	../LRB396_d1_r4/Snap-97307-Image Export-73.tif	1	TRUE	869.04
LRB396	d1	r4	../LRB396_d1_r4/Snap-97298-Image Export-64.tif	0	TRUE	843.368
LRB396	d1	r4	../LRB396_d1_r4/Snap-97237-Image Export-03.tif	0	TRUE	809.338
LRB396	d1	r4	../LRB396_d1_r4/Snap-97282-Image Export-48.tif	0	TRUE	918.421
LRB396	d1	r4	../LRB396_d1_r4/Snap-97283-Image Export-49.tif	0	TRUE	852.691
LRB396	d1	r4	../LRB396_d1_r4/Snap-97257-Image Export-23.tif	0	TRUE	836.489
LRB396	d1	r4	../LRB396_d1_r4/Snap-97257-Image Export-23.tif	1	TRUE	846.754
LRB396	d1	r4	../LRB396_d1_r4/Snap-97300-Image Export-66.tif	0	TRUE	824.208
LRB396	d1	r4	../LRB396_d1_r4/Snap-97300-Image Export-66.tif	1	TRUE	879.749
LRB396	d1	r4	../LRB396_d1_r4/Snap-97300-Image Export-66.tif	2	TRUE	900.426
LRB396	d1	r4	../LRB396_d1_r4/Snap-97300-Image Export-66.tif	3	TRUE	822.155
LRB396	d1	r4	../LRB396_d1_r4/Snap-97262-Image Export-28.tif	0	TRUE	867.301
LRB396	d1	r4	../LRB396_d1_r4/Snap-97263-Image Export-29.tif	2	TRUE	847.03
LRB396	d1	r4	../LRB396_d1_r4/Snap-97263-Image Export-29.tif	3	TRUE	875.605
LRB396	d1	r4	../LRB396_d1_r4/Snap-97301-Image Export-67.tif	0	TRUE	896.098
LRB396	d1	r4	../LRB396_d1_r4/Snap-97301-Image Export-67.tif	1	TRUE	825.281
LRB396	d1	r4	../LRB396_d1_r4/Snap-97301-Image Export-67.tif	3	TRUE	816.218
LRB396	d1	r4	../LRB396_d1_r4/Snap-97252-Image Export-18.tif	0	TRUE	721.062
LRB396	d1	r4	../LRB396_d1_r4/Snap-97255-Image Export-21.tif	0	TRUE	803.179
LRB396	d1	r4	../LRB396_d1_r4/Snap-97254-Image Export-20.tif	0	TRUE	876.716
LRB396	d1	r4	../LRB396_d1_r4/Snap-97253-Image Export-19.tif	0	TRUE	866.894
LRB396	d1	r4	../LRB396_d1_r4/Snap-97253-Image Export-19.tif	1	TRUE	801.57
LRB396	d1	r4	../LRB396_d1_r4/Snap-97253-Image Export-19.tif	2	TRUE	821.489
LRB396	d1	r4	../LRB396_d1_r4/Snap-97274-Image Export-40.tif	0	TRUE	903.644
LRB396	d1	r4	../LRB396_d1_r4/Snap-97274-Image Export-40.tif	1	TRUE	825.059
LRB396	d1	r4	../LRB396_d1_r4/Snap-97250-Image Export-16.tif	0	TRUE	875.421
LRB396	d1	r4	../LRB396_d1_r4/Snap-97275-Image Export-41.tif	1	TRUE	869.04
LRB396	d1	r4	../LRB396_d1_r4/Snap-97275-Image Export-41.tif	2	TRUE	874.755
LRB396	d1	r4	../LRB396_d1_r4/Snap-97275-Image Export-41.tif	3	TRUE	845.107
LRB396	d1	r4	../LRB396_d1_r4/Snap-97251-Image Export-17.tif	0	TRUE	914.039
LRB396	d1	r4	../LRB396_d1_r4/Snap-97276-Image Export-42.tif	3	TRUE	889.088
LRB396	d1	r4	../LRB396_d1_r4/Snap-97302-Image Export-68.tif	1	TRUE	812.426
LRB396	d1	r4	../LRB396_d1_r4/Snap-97302-Image Export-68.tif	2	TRUE	875.513
LRB396	d1	r4	../LRB396_d1_r4/Snap-97260-Image Export-26.tif	0	TRUE	873.016
LRB396	d1	r4	../LRB396_d1_r4/Snap-97277-Image Export-43.tif	0	TRUE	894.137
LRB396	d1	r4	../LRB396_d1_r4/Snap-97277-Image Export-43.tif	1	TRUE	900.334
LRB396	d1	r4	../LRB396_d1_r4/Snap-97261-Image Export-27.tif	2	TRUE	897.837
LRB396	d1	r4	../LRB396_d1_r4/Snap-97261-Image Export-27.tif	3	TRUE	785.406
LRB396	d1	r4	../LRB396_d1_r4/Snap-97303-Image Export-69.tif	0	TRUE	868.097
LRB396	d1	r4	../LRB396_d1_r4/Snap-97303-Image Export-69.tif	1	TRUE	876.9
LRB396	d1	r4	../LRB396_d1_r4/Snap-97303-Image Export-69.tif	2	TRUE	853.097
LRB396	d1	r4	../LRB396_d1_r4/Snap-97303-Image Export-69.tif	3	TRUE	858.59
LRB396	d1	r4	../LRB396_d1_r4/Snap-97248-Image Export-14.tif	0	TRUE	881.228
LRB396	d1	r4	../LRB396_d1_r4/Snap-97248-Image Export-14.tif	1	TRUE	875.865
LRB396	d1	r4	../LRB396_d1_r4/Snap-97280-Image Export-46.tif	0	TRUE	825.687
LRB396	d1	r4	../LRB396_d1_r4/Snap-97249-Image Export-15.tif	0	TRUE	847.827
LRB396	d1	r4	../LRB396_d1_r4/Snap-97249-Image Export-15.tif	1	TRUE	833.179
LRB396	d1	r4	../LRB396_d1_r4/Snap-97281-Image Export-47.tif	1	TRUE	836.895
LRB396	d1	r4	../LRB396_d1_r4/Snap-97284-Image Export-50.tif	0	TRUE	803.976
LRB396	d1	r4	../LRB396_d1_r4/Snap-97284-Image Export-50.tif	1	TRUE	844.793
LRB396	d1	r4	../LRB396_d1_r4/Snap-97285-Image Export-51.tif	0	TRUE	859.218
LRB396	d1	r4	../LRB396_d1_r4/Snap-97285-Image Export-51.tif	1	TRUE	811.299
LRB396	d1	r4	../LRB396_d1_r4/Snap-97286-Image Export-52.tif	0	TRUE	786.701
LRB396	d1	r4	../LRB396_d1_r4/Snap-97287-Image Export-53.tif	1	TRUE	888.46
LRB396	d1	r4	../LRB396_d1_r4/Snap-97266-Image Export-32.tif	0	TRUE	786.348
LRB396	d1	r4	../LRB396_d1_r4/Snap-97266-Image Export-32.tif	2	TRUE	866.044
LRB396	d1	r4	../LRB396_d1_r4/Snap-97266-Image Export-32.tif	3	TRUE	836.489
LRB396	d1	r4	../LRB396_d1_r4/Snap-97267-Image Export-33.tif	0	TRUE	854.3
LRB396	d1	r4	../LRB396_d1_r4/Snap-97267-Image Export-33.tif	1	TRUE	871.759
LRB396	d1	r4	../LRB396_d1_r4/Snap-97264-Image Export-30.tif	0	TRUE	896.32
LRB396	d1	r4	../LRB396_d1_r4/Snap-97264-Image Export-30.tif	1	TRUE	856.537
LRB396	d1	r4	../LRB396_d1_r4/Snap-97264-Image Export-30.tif	2	TRUE	896.32
LRB396	d1	r4	../LRB396_d1_r4/Snap-97265-Image Export-31.tif	1	TRUE	853.005
LRB396	d1	r4	../LRB396_d1_r4/Snap-97265-Image Export-31.tif	2	TRUE	828.406
LRB396	d1	r4	../LRB396_d1_r4/Snap-97278-Image Export-44.tif	0	TRUE	906.049
LRB396	d1	r4	../LRB396_d1_r4/Snap-97278-Image Export-44.tif	1	TRUE	827.556
LRB396	d1	r4	../LRB396_d1_r4/Snap-97279-Image Export-45.tif	0	TRUE	807.822
LRB396	d1	r4	../LRB396_d1_r4/Snap-97246-Image Export-12.tif	0	TRUE	815.368
LRB396	d1	r4	../LRB396_d1_r4/Snap-97247-Image Export-13.tif	0	TRUE	807.193
LRB396	d1	r4	../LRB396_d1_r4/Snap-97244-Image Export-10.tif	0	TRUE	798.223
LRB396	d1	r4	../LRB396_d1_r4/Snap-97245-Image Export-11.tif	0	TRUE	874.44
LRB396	d1	r4	../LRB396_d1_r4/Snap-97312-Image Export-78.tif	0	TRUE	910.209
LRB396	d1	r4	../LRB396_d1_r4/Snap-97312-Image Export-78.tif	1	TRUE	881.358
LRB396	d1	r4	../LRB396_d1_r4/Snap-97270-Image Export-36.tif	0	TRUE	872.295
LRB396	d1	r4	../LRB396_d1_r4/Snap-97271-Image Export-37.tif	0	TRUE	809.653
LRB396	d1	r4	../LRB396_d1_r4/Snap-97313-Image Export-79.tif	0	TRUE	841.667
LRB396	d1	r4	../LRB396_d1_r4/Snap-97313-Image Export-79.tif	1	TRUE	778.71
LRB396	d1	r4	../LRB396_d1_r4/Snap-97313-Image Export-79.tif	2	TRUE	879.711
LRB396	d1	r4	../LRB396_d1_r4/Snap-97288-Image Export-54.tif	1	TRUE	912.614
LRB396	d1	r4	../LRB396_d1_r4/Snap-97289-Image Export-55.tif	0	TRUE	862.382
LRB396	d1	r4	../LRB396_d1_r4/Snap-97289-Image Export-55.tif	1	TRUE	867.117
LRB396	d1	r4	../LRB396_d1_r4/Snap-97289-Image Export-55.tif	3	TRUE	846.402
LRB396	d1	r4	../LRB396_d1_r4/Snap-97241-Image Export-07.tif	1	TRUE	866.228
LRB396	d1	r4	../LRB396_d1_r4/Snap-97268-Image Export-34.tif	1	TRUE	702.27
LRB396	d1	r4	../LRB396_d1_r4/Snap-97268-Image Export-34.tif	2	TRUE	853.189
LRB396	d1	r4	../LRB396_d1_r4/Snap-97269-Image Export-35.tif	1	TRUE	843.72
LRB396	d1	r4	../LRB396_d1_r4/Snap-97290-Image Export-56.tif	1	TRUE	926.596
LRB396	d1	r4	../LRB396_d1_r4/Snap-97291-Image Export-57.tif	1	TRUE	876.363
LRB396	d1	r4	../LRB396_d1_r4/Snap-97291-Image Export-57.tif	2	TRUE	849.88
LRB396	d1	r4	../LRB396_d1_r4/Snap-97291-Image Export-57.tif	3	TRUE	873.276
LRB396	d1	r3	../LRB396_d1_r3/Snap-97072-Image Export-16.tif	0	TRUE	823.358
LRB396	d1	r3	../LRB396_d1_r3/Snap-97072-Image Export-16.tif	1	TRUE	749.193
LRB396	d1	r3	../LRB396_d1_r3/Snap-97072-Image Export-16.tif	2	TRUE	929.537
LRB396	d1	r3	../LRB396_d1_r3/Snap-97073-Image Export-17.tif	0	TRUE	713.478
LRB396	d1	r3	../LRB396_d1_r3/Snap-97073-Image Export-17.tif	2	TRUE	913.779
LRB396	d1	r3	../LRB396_d1_r3/Snap-97073-Image Export-17.tif	3	TRUE	915.832
LRB396	d1	r3	../LRB396_d1_r3/Snap-97073-Image Export-17.tif	4	TRUE	691.507
LRB396	d1	r3	../LRB396_d1_r3/Snap-97071-Image Export-15.tif	1	TRUE	957.668
LRB396	d1	r3	../LRB396_d1_r3/Snap-97085-Image Export-29.tif	0	TRUE	933.107
LRB396	d1	r3	../LRB396_d1_r3/Snap-97085-Image Export-29.tif	1	TRUE	932.311
LRB396	d1	r3	../LRB396_d1_r3/Snap-97069-Image Export-13.tif	0	TRUE	834.343
LRB396	d1	r3	../LRB396_d1_r3/Snap-97068-Image Export-12.tif	0	TRUE	880.247
LRB396	d1	r3	../LRB396_d1_r3/Snap-97094-Image Export-38.tif	0	TRUE	770.98
LRB396	d1	r3	../LRB396_d1_r3/Snap-97095-Image Export-39.tif	0	TRUE	849.213
LRB396	d1	r3	../LRB396_d1_r3/Snap-97066-Image Export-10.tif	0	TRUE	808.58
LRB396	d1	r3	../LRB396_d1_r3/Snap-97067-Image Export-11.tif	0	TRUE	787.551
LRB396	d1	r3	../LRB396_d1_r3/Snap-97104-Image Export-48.tif	0	TRUE	944.055
LRB396	d1	r3	../LRB396_d1_r3/Snap-97060-Image Export-04.tif	0	TRUE	845.329
LRB396	d1	r3	../LRB396_d1_r3/Snap-97061-Image Export-05.tif	0	TRUE	900.426
LRB396	d1	r3	../LRB396_d1_r3/Snap-97063-Image Export-07.tif	0	TRUE	838.45
LRB396	d1	r3	../LRB396_d1_r3/Snap-97102-Image Export-46.tif	0	TRUE	823.856
LRB396	d1	r3	../LRB396_d1_r3/Snap-97102-Image Export-46.tif	1	TRUE	810.633
LRB396	d1	r3	../LRB396_d1_r3/Snap-97102-Image Export-46.tif	2	TRUE	808.58
LRB396	d1	r3	../LRB396_d1_r3/Snap-97057-Image Export-01.tif	0	TRUE	895.155
LRB396	d1	r3	../LRB396_d1_r3/Snap-97100-Image Export-44.tif	0	TRUE	830.329
LRB396	d1	r3	../LRB396_d1_r3/Snap-97100-Image Export-44.tif	1	TRUE	892.122
LRB396	d1	r3	../LRB396_d1_r3/Snap-97100-Image Export-44.tif	3	TRUE	856.223
LRB396	d1	r3	../LRB396_d1_r3/Snap-97098-Image Export-42.tif	0	TRUE	877.566
LRB396	d1	r3	../LRB396_d1_r3/Snap-97101-Image Export-45.tif	0	TRUE	845.551
LRB396	d1	r3	../LRB396_d1_r3/Snap-97101-Image Export-45.tif	1	TRUE	1149.51
LRB396	d1	r3	../LRB396_d1_r3/Snap-97099-Image Export-43.tif	2	TRUE	874.126
LRB396	d1	r3	../LRB396_d1_r3/Snap-97099-Image Export-43.tif	3	TRUE	864.435
LRB396	d1	r3	../LRB396_d1_r3/Snap-97093-Image Export-37.tif	0	TRUE	909.006
LRB396	d1	r3	../LRB396_d1_r3/Snap-97092-Image Export-36.tif	0	TRUE	886.092
LRB396	d1	r3	../LRB396_d1_r3/Snap-97092-Image Export-36.tif	1	TRUE	859.348
LRB396	d1	r3	../LRB396_d1_r3/Snap-97091-Image Export-35.tif	0	TRUE	846.218
LRB396	d1	r3	../LRB396_d1_r3/Snap-97090-Image Export-34.tif	0	TRUE	934.364
LRB396	d1	r3	../LRB396_d1_r3/Snap-97065-Image Export-09.tif	1	TRUE	906.547
LRB396	d1	r3	../LRB396_d1_r3/Snap-97065-Image Export-09.tif	2	TRUE	841.445
LRB396	d1	r3	../LRB396_d1_r3/Snap-97064-Image Export-08.tif	0	TRUE	754.372
LRB396	d1	r3	../LRB396_d1_r3/Snap-97106-Image Export-50.tif	0	TRUE	807.285
LRB396	d1	r3	../LRB396_d1_r3/Snap-97106-Image Export-50.tif	1	TRUE	807.599
LRB396	d1	r3	../LRB396_d1_r3/Snap-97088-Image Export-32.tif	0	TRUE	931.276
LRB396	d1	r3	../LRB396_d1_r3/Snap-97088-Image Export-32.tif	1	TRUE	871.575
LRB396	d1	r3	../LRB396_d1_r3/Snap-97088-Image Export-32.tif	2	TRUE	764.155
LRB396	d1	r3	../LRB396_d1_r3/Snap-97107-Image Export-51.tif	1	TRUE	859.977
LRB396	d1	r3	../LRB396_d1_r3/Snap-97089-Image Export-33.tif	0	TRUE	910.985
LRB396	d1	r3	../LRB396_d1_r3/Snap-97089-Image Export-33.tif	1	TRUE	710.705
LRB396	d1	r3	../LRB396_d1_r3/Snap-97089-Image Export-33.tif	2	TRUE	832.512
LRB396	d1	r3	../LRB396_d1_r3/Snap-97075-Image Export-19.tif	2	TRUE	719.86
LRB396	d1	r3	../LRB396_d1_r3/Snap-97075-Image Export-19.tif	3	TRUE	889.402
LRB396	d1	r3	../LRB396_d1_r3/Snap-97075-Image Export-19.tif	4	TRUE	851.488
LRB396	d1	r3	../LRB396_d1_r3/Snap-97074-Image Export-18.tif	0	TRUE	794.024
LRB396	d1	r3	../LRB396_d1_r3/Snap-97074-Image Export-18.tif	2	TRUE	899.353
LRB396	d1	r3	../LRB396_d1_r3/Snap-97087-Image Export-31.tif	0	TRUE	909.451
LRB396	d1	r3	../LRB396_d1_r3/Snap-97109-Image Export-53.tif	0	TRUE	889.532
LRB396	d1	r3	../LRB396_d1_r3/Snap-97086-Image Export-30.tif	3	TRUE	819.88
LRB396	d1	r3	../LRB396_d1_r3/Snap-97108-Image Export-52.tif	0	TRUE	889.977
LRB396	d1	r3	../LRB396_d1_r3/Snap-97110-Image Export-54.tif	0	TRUE	670.83
LRB396	d1	r3	../LRB396_d1_r3/Snap-97110-Image Export-54.tif	1	TRUE	764.507
LRB396	d1	r3	../LRB396_d1_r3/Snap-97110-Image Export-54.tif	2	TRUE	763.396
LRB396	d1	r3	../LRB396_d1_r3/Snap-97077-Image Export-21.tif	0	TRUE	834.121
LRB396	d1	r3	../LRB396_d1_r3/Snap-97077-Image Export-21.tif	1	TRUE	733.971
LRB396	d1	r3	../LRB396_d1_r3/Snap-97076-Image Export-20.tif	0	TRUE	691.063
LRB396	d1	r3	../LRB396_d1_r3/Snap-97097-Image Export-41.tif	0	TRUE	837.561
LRB396	d1	r3	../LRB396_d1_r3/Snap-97058-Image Export-02.tif	0	TRUE	807.73
LRB396	d1	r3	../LRB396_d1_r3/Snap-97096-Image Export-40.tif	0	TRUE	837.599
LRB396	d1	r3	../LRB396_d1_r3/Snap-97096-Image Export-40.tif	1	TRUE	883.633
LRB396	d1	r3	../LRB396_d1_r3/Snap-97059-Image Export-03.tif	0	TRUE	920.29
LRB396	d1	r3	../LRB396_d1_r3/Snap-97080-Image Export-24.tif	0	TRUE	802.957
LRB396	d1	r3	../LRB396_d1_r3/Snap-97083-Image Export-27.tif	1	TRUE	782.058
LRB396	d1	r3	../LRB396_d1_r3/Snap-97083-Image Export-27.tif	3	TRUE	774.512
LRB396	d1	r4	../LRB396_d1_r4/Snap-97295-Image Export-61.tif	0	TRUE	895.247
LRB396	d1	r4	../LRB396_d1_r4/Snap-97295-Image Export-61.tif	1	TRUE	837.691
LRB396	d1	r4	../LRB396_d1_r4/Snap-97292-Image Export-58.tif	2	TRUE	761.604
LRB396	d1	r4	../LRB396_d1_r4/Snap-97293-Image Export-59.tif	0	TRUE	792.914
LRB396	d1	r4	../LRB396_d1_r4/Snap-97293-Image Export-59.tif	1	TRUE	919.05
LRB396	d1	r4	../LRB396_d1_r4/Snap-97293-Image Export-59.tif	2	TRUE	836.305
LRB396	d1	r4	../LRB396_d1_r4/Snap-97308-Image Export-74.tif	0	TRUE	884.262
LRB396	d1	r4	../LRB396_d1_r4/Snap-97308-Image Export-74.tif	1	TRUE	871.943
LRB396	d1	r4	../LRB396_d1_r4/Snap-97297-Image Export-63.tif	0	TRUE	858.368
LRB396	d1	r4	../LRB396_d1_r4/Snap-97238-Image Export-04.tif	0	TRUE	804.918
LRB396	d1	r4	../LRB396_d1_r4/Snap-97309-Image Export-75.tif	0	TRUE	856.001
LRB396	d1	r4	../LRB396_d1_r4/Snap-97309-Image Export-75.tif	1	TRUE	902.479
LRB396	d1	r4	../LRB396_d1_r4/Snap-97309-Image Export-75.tif	2	TRUE	840.465
LRB396	d1	r4	../LRB396_d1_r4/Snap-97296-Image Export-62.tif	0	TRUE	879.803
LRB396	d1	r4	../LRB396_d1_r4/Snap-97239-Image Export-05.tif	0	TRUE	857.924
LRB396	d1	r4	../LRB396_d1_r4/Snap-97243-Image Export-09.tif	0	TRUE	820.01
LRB396	d1	r4	../LRB396_d1_r4/Snap-97310-Image Export-76.tif	0	TRUE	851.358
LRB396	d1	r4	../LRB396_d1_r4/Snap-97310-Image Export-76.tif	1	TRUE	850.86
LRB396	d1	r4	../LRB396_d1_r4/Snap-97310-Image Export-76.tif	2	TRUE	906.677
LRB396	d1	r4	../LRB396_d1_r4/Snap-97272-Image Export-38.tif	0	TRUE	871.185
LRB396	d1	r4	../LRB396_d1_r4/Snap-97273-Image Export-39.tif	0	TRUE	827.02
LRB396	d1	r4	../LRB396_d1_r4/Snap-97311-Image Export-77.tif	0	TRUE	888.146
LRB396	d1	r4	../LRB396_d1_r4/Snap-97311-Image Export-77.tif	1	TRUE	827.74
LRB396	d1	r4	../LRB396_d1_r4/Snap-97259-Image Export-25.tif	0	TRUE	865.155
LRB396	d1	r4	../LRB396_d1_r4/Snap-97258-Image Export-24.tif	0	TRUE	879.803
LRB396	d1	r4	../LRB396_d1_r4/Snap-97258-Image Export-24.tif	1	TRUE	861.31
LRB396	d1	r4	../LRB396_d1_r4/Snap-97305-Image Export-71.tif	1	TRUE	877.03
LRB396	d1	r4	../LRB396_d1_r4/Snap-97305-Image Export-71.tif	2	TRUE	867.875
LRB396	d1	r4	../LRB396_d1_r4/Snap-97306-Image Export-72.tif	1	TRUE	879.305
LRB396	d1	r4	../LRB396_d1_r4/Snap-97299-Image Export-65.tif	0	TRUE	808.894
LRB396	d1	r4	../LRB396_d1_r4/Snap-97236-Image Export-02.tif	0	TRUE	891.585
LRB396	d1	r4	../LRB396_d1_r4/Snap-97307-Image Export-73.tif	1	TRUE	869.04
LRB396	d1	r4	../LRB396_d1_r4/Snap-97298-Image Export-64.tif	0	TRUE	843.368
LRB396	d1	r4	../LRB396_d1_r4/Snap-97237-Image Export-03.tif	0	TRUE	809.338
LRB396	d1	r4	../LRB396_d1_r4/Snap-97282-Image Export-48.tif	0	TRUE	918.421
LRB396	d1	r4	../LRB396_d1_r4/Snap-97283-Image Export-49.tif	0	TRUE	852.691
LRB396	d1	r4	../LRB396_d1_r4/Snap-97257-Image Export-23.tif	0	TRUE	836.489
LRB396	d1	r4	../LRB396_d1_r4/Snap-97257-Image Export-23.tif	1	TRUE	846.754
LRB396	d1	r4	../LRB396_d1_r4/Snap-97300-Image Export-66.tif	0	TRUE	824.208
LRB396	d1	r4	../LRB396_d1_r4/Snap-97300-Image Export-66.tif	1	TRUE	879.749
LRB396	d1	r4	../LRB396_d1_r4/Snap-97300-Image Export-66.tif	2	TRUE	900.426
LRB396	d1	r4	../LRB396_d1_r4/Snap-97300-Image Export-66.tif	3	TRUE	822.155
LRB396	d1	r4	../LRB396_d1_r4/Snap-97262-Image Export-28.tif	0	TRUE	867.301
LRB396	d1	r4	../LRB396_d1_r4/Snap-97263-Image Export-29.tif	2	TRUE	847.03
LRB396	d1	r4	../LRB396_d1_r4/Snap-97263-Image Export-29.tif	3	TRUE	875.605
LRB396	d1	r4	../LRB396_d1_r4/Snap-97301-Image Export-67.tif	0	TRUE	896.098
LRB396	d1	r4	../LRB396_d1_r4/Snap-97301-Image Export-67.tif	1	TRUE	825.281
LRB396	d1	r4	../LRB396_d1_r4/Snap-97301-Image Export-67.tif	3	TRUE	816.218
LRB396	d1	r4	../LRB396_d1_r4/Snap-97252-Image Export-18.tif	0	TRUE	721.062
LRB396	d1	r4	../LRB396_d1_r4/Snap-97255-Image Export-21.tif	0	TRUE	803.179
LRB396	d1	r4	../LRB396_d1_r4/Snap-97254-Image Export-20.tif	0	TRUE	876.716
LRB396	d1	r4	../LRB396_d1_r4/Snap-97253-Image Export-19.tif	0	TRUE	866.894
LRB396	d1	r4	../LRB396_d1_r4/Snap-97253-Image Export-19.tif	1	TRUE	801.57
LRB396	d1	r4	../LRB396_d1_r4/Snap-97253-Image Export-19.tif	2	TRUE	821.489
LRB396	d1	r4	../LRB396_d1_r4/Snap-97274-Image Export-40.tif	0	TRUE	903.644
LRB396	d1	r4	../LRB396_d1_r4/Snap-97274-Image Export-40.tif	1	TRUE	825.059
LRB396	d1	r4	../LRB396_d1_r4/Snap-97250-Image Export-16.tif	0	TRUE	875.421
LRB396	d1	r4	../LRB396_d1_r4/Snap-97275-Image Export-41.tif	1	TRUE	869.04
LRB396	d1	r4	../LRB396_d1_r4/Snap-97275-Image Export-41.tif	2	TRUE	874.755
LRB396	d1	r4	../LRB396_d1_r4/Snap-97275-Image Export-41.tif	3	TRUE	845.107
LRB396	d1	r4	../LRB396_d1_r4/Snap-97251-Image Export-17.tif	0	TRUE	914.039
LRB396	d1	r4	../LRB396_d1_r4/Snap-97276-Image Export-42.tif	3	TRUE	889.088
LRB396	d1	r4	../LRB396_d1_r4/Snap-97302-Image Export-68.tif	1	TRUE	812.426
LRB396	d1	r4	../LRB396_d1_r4/Snap-97302-Image Export-68.tif	2	TRUE	875.513
LRB396	d1	r4	../LRB396_d1_r4/Snap-97260-Image Export-26.tif	0	TRUE	873.016
LRB396	d1	r4	../LRB396_d1_r4/Snap-97277-Image Export-43.tif	0	TRUE	894.137
LRB396	d1	r4	../LRB396_d1_r4/Snap-97277-Image Export-43.tif	1	TRUE	900.334
LRB396	d1	r4	../LRB396_d1_r4/Snap-97261-Image Export-27.tif	2	TRUE	897.837
LRB396	d1	r4	../LRB396_d1_r4/Snap-97261-Image Export-27.tif	3	TRUE	785.406
LRB396	d1	r4	../LRB396_d1_r4/Snap-97303-Image Export-69.tif	0	TRUE	868.097
LRB396	d1	r4	../LRB396_d1_r4/Snap-97303-Image Export-69.tif	1	TRUE	876.9
LRB396	d1	r4	../LRB396_d1_r4/Snap-97303-Image Export-69.tif	2	TRUE	853.097
LRB396	d1	r4	../LRB396_d1_r4/Snap-97303-Image Export-69.tif	3	TRUE	858.59
LRB396	d1	r4	../LRB396_d1_r4/Snap-97248-Image Export-14.tif	0	TRUE	881.228
LRB396	d1	r4	../LRB396_d1_r4/Snap-97248-Image Export-14.tif	1	TRUE	875.865
LRB396	d1	r4	../LRB396_d1_r4/Snap-97280-Image Export-46.tif	0	TRUE	825.687
LRB396	d1	r4	../LRB396_d1_r4/Snap-97249-Image Export-15.tif	0	TRUE	847.827
LRB396	d1	r4	../LRB396_d1_r4/Snap-97249-Image Export-15.tif	1	TRUE	833.179
LRB396	d1	r4	../LRB396_d1_r4/Snap-97281-Image Export-47.tif	1	TRUE	836.895
LRB396	d1	r4	../LRB396_d1_r4/Snap-97284-Image Export-50.tif	0	TRUE	803.976
LRB396	d1	r4	../LRB396_d1_r4/Snap-97284-Image Export-50.tif	1	TRUE	844.793
LRB396	d1	r4	../LRB396_d1_r4/Snap-97285-Image Export-51.tif	0	TRUE	859.218
LRB396	d1	r4	../LRB396_d1_r4/Snap-97285-Image Export-51.tif	1	TRUE	811.299
LRB396	d1	r4	../LRB396_d1_r4/Snap-97286-Image Export-52.tif	0	TRUE	786.701
LRB396	d1	r4	../LRB396_d1_r4/Snap-97287-Image Export-53.tif	1	TRUE	888.46
LRB396	d1	r4	../LRB396_d1_r4/Snap-97266-Image Export-32.tif	0	TRUE	786.348
LRB396	d1	r4	../LRB396_d1_r4/Snap-97266-Image Export-32.tif	2	TRUE	866.044
LRB396	d1	r4	../LRB396_d1_r4/Snap-97266-Image Export-32.tif	3	TRUE	836.489
LRB396	d1	r4	../LRB396_d1_r4/Snap-97267-Image Export-33.tif	0	TRUE	854.3
LRB396	d1	r4	../LRB396_d1_r4/Snap-97267-Image Export-33.tif	1	TRUE	871.759
LRB396	d1	r4	../LRB396_d1_r4/Snap-97264-Image Export-30.tif	0	TRUE	896.32
LRB396	d1	r4	../LRB396_d1_r4/Snap-97264-Image Export-30.tif	1	TRUE	856.537
LRB396	d1	r4	../LRB396_d1_r4/Snap-97264-Image Export-30.tif	2	TRUE	896.32
LRB396	d1	r4	../LRB396_d1_r4/Snap-97265-Image Export-31.tif	1	TRUE	853.005
LRB396	d1	r4	../LRB396_d1_r4/Snap-97265-Image Export-31.tif	2	TRUE	828.406
LRB396	d1	r4	../LRB396_d1_r4/Snap-97278-Image Export-44.tif	0	TRUE	906.049
LRB396	d1	r4	../LRB396_d1_r4/Snap-97278-Image Export-44.tif	1	TRUE	827.556
LRB396	d1	r4	../LRB396_d1_r4/Snap-97279-Image Export-45.tif	0	TRUE	807.822
LRB396	d1	r4	../LRB396_d1_r4/Snap-97246-Image Export-12.tif	0	TRUE	815.368
LRB396	d1	r4	../LRB396_d1_r4/Snap-97244-Image Export-10.tif	0	TRUE	798.223
LRB396	d1	r4	../LRB396_d1_r4/Snap-97245-Image Export-11.tif	0	TRUE	874.44
LRB396	d1	r4	../LRB396_d1_r4/Snap-97312-Image Export-78.tif	0	TRUE	910.209
LRB396	d1	r4	../LRB396_d1_r4/Snap-97312-Image Export-78.tif	1	TRUE	881.358
LRB396	d1	r4	../LRB396_d1_r4/Snap-97270-Image Export-36.tif	0	TRUE	872.295
LRB396	d1	r4	../LRB396_d1_r4/Snap-97271-Image Export-37.tif	0	TRUE	809.653
LRB396	d1	r4	../LRB396_d1_r4/Snap-97313-Image Export-79.tif	0	TRUE	841.667
LRB396	d1	r4	../LRB396_d1_r4/Snap-97313-Image Export-79.tif	1	TRUE	778.71
LRB396	d1	r4	../LRB396_d1_r4/Snap-97313-Image Export-79.tif	2	TRUE	879.711
LRB396	d1	r4	../LRB396_d1_r4/Snap-97288-Image Export-54.tif	1	TRUE	912.614
LRB396	d1	r4	../LRB396_d1_r4/Snap-97240-Image Export-06.tif	0	TRUE	808.542
LRB396	d1	r4	../LRB396_d1_r4/Snap-97289-Image Export-55.tif	0	TRUE	862.382
LRB396	d1	r4	../LRB396_d1_r4/Snap-97289-Image Export-55.tif	1	TRUE	867.117
LRB396	d1	r4	../LRB396_d1_r4/Snap-97289-Image Export-55.tif	3	TRUE	846.402
LRB396	d1	r4	../LRB396_d1_r4/Snap-97241-Image Export-07.tif	1	TRUE	866.228
LRB396	d1	r4	../LRB396_d1_r4/Snap-97268-Image Export-34.tif	1	TRUE	702.27
LRB396	d1	r4	../LRB396_d1_r4/Snap-97268-Image Export-34.tif	2	TRUE	853.189
LRB396	d1	r4	../LRB396_d1_r4/Snap-97269-Image Export-35.tif	1	TRUE	843.72
LRB396	d1	r4	../LRB396_d1_r4/Snap-97290-Image Export-56.tif	1	TRUE	926.596
LRB396	d1	r4	../LRB396_d1_r4/Snap-97291-Image Export-57.tif	1	TRUE	876.363
LRB396	d1	r4	../LRB396_d1_r4/Snap-97291-Image Export-57.tif	2	TRUE	849.88
LRB396	d1	r4	../LRB396_d1_r4/Snap-97291-Image Export-57.tif	3	TRUE	873.276
LRB401	d1	r3	../LRB401_d1_r3/Snap-96927-Image Export-08.tif	0	TRUE	878.01
LRB401	d1	r3	../LRB401_d1_r3/Snap-96938-Image Export-19.tif	0	TRUE	816.44
LRB401	d1	r3	../LRB401_d1_r3/Snap-96958-Image Export-39.tif	0	TRUE	923.952
LRB401	d1	r3	../LRB401_d1_r3/Snap-96958-Image Export-39.tif	1	TRUE	875.015
LRB401	d1	r3	../LRB401_d1_r3/Snap-96958-Image Export-39.tif	2	TRUE	915.518
LRB401	d1	r3	../LRB401_d1_r3/Snap-96960-Image Export-41.tif	0	TRUE	889.18
LRB401	d1	r3	../LRB401_d1_r3/Snap-96960-Image Export-41.tif	5	TRUE	945.794
LRB401	d1	r3	../LRB401_d1_r3/Snap-96960-Image Export-41.tif	7	TRUE	908.194
LRB401	d1	r3	../LRB401_d1_r3/Snap-96939-Image Export-20.tif	0	TRUE	902.609
LRB401	d1	r3	../LRB401_d1_r3/Snap-96965-Image Export-46.tif	1	TRUE	928.112
LRB401	d1	r3	../LRB401_d1_r3/Snap-96965-Image Export-46.tif	2	TRUE	895.117
LRB401	d1	r3	../LRB401_d1_r3/Snap-96962-Image Export-43.tif	2	TRUE	954.504
LRB401	d1	r3	../LRB401_d1_r3/Snap-96962-Image Export-43.tif	3	TRUE	857.295
LRB401	d1	r3	../LRB401_d1_r3/Snap-96962-Image Export-43.tif	5	TRUE	897.522
LRB401	d1	r3	../LRB401_d1_r3/Snap-96947-Image Export-28.tif	2	TRUE	878.01
LRB401	d1	r3	../LRB401_d1_r3/Snap-96947-Image Export-28.tif	3	TRUE	920.566
LRB401	d1	r3	../LRB401_d1_r3/Snap-96964-Image Export-45.tif	0	TRUE	866.45
LRB401	d1	r3	../LRB401_d1_r3/Snap-96964-Image Export-45.tif	6	TRUE	883.189
LRB401	d1	r3	../LRB401_d1_r3/Snap-96964-Image Export-45.tif	11	TRUE	924.652
LRB401	d1	r3	../LRB401_d1_r3/Snap-96966-Image Export-47.tif	0	TRUE	877.474
LRB401	d1	r3	../LRB401_d1_r3/Snap-96966-Image Export-47.tif	1	TRUE	918.735
LRB401	d1	r3	../LRB401_d1_r3/Snap-96961-Image Export-42.tif	1	TRUE	919.494
LRB401	d1	r3	../LRB401_d1_r3/Snap-96961-Image Export-42.tif	5	TRUE	906.547
LRB401	d1	r3	../LRB401_d1_r3/Snap-96961-Image Export-42.tif	6	TRUE	967.581
LRB401	d1	r3	../LRB401_d1_r3/Snap-96961-Image Export-42.tif	7	TRUE	895.117
LRB401	d1	r3	../LRB401_d1_r3/Snap-96961-Image Export-42.tif	8	TRUE	904.586
LRB401	d1	r3	../LRB401_d1_r3/Snap-96961-Image Export-42.tif	10	TRUE	884.852
LRB401	d1	r3	../LRB401_d1_r3/Snap-96969-Image Export-50.tif	4	TRUE	904.31
LRB401	d1	r3	../LRB401_d1_r3/Snap-96969-Image Export-50.tif	5	TRUE	890.199
LRB401	d1	r3	../LRB401_d1_r3/Snap-96975-Image Export-56.tif	1	TRUE	939.228
LRB401	d1	r3	../LRB401_d1_r3/Snap-96972-Image Export-53.tif	1	TRUE	851.396
LRB401	d1	r3	../LRB401_d1_r3/Snap-96972-Image Export-53.tif	2	TRUE	908.508
LRB401	d1	r3	../LRB401_d1_r3/Snap-96972-Image Export-53.tif	3	TRUE	962.142
LRB401	d1	r3	../LRB401_d1_r3/Snap-96957-Image Export-38.tif	0	TRUE	891.049
LRB401	d1	r3	../LRB401_d1_r3/Snap-96957-Image Export-38.tif	1	TRUE	886.537
LRB401	d1	r3	../LRB401_d1_r3/Snap-96957-Image Export-38.tif	2	TRUE	904.9
LRB401	d1	r3	../LRB401_d1_r3/Snap-96957-Image Export-38.tif	3	TRUE	783.889
LRB401	d1	r3	../LRB401_d1_r3/Snap-96957-Image Export-38.tif	4	TRUE	360.244
LRB401	d1	r3	../LRB401_d1_r3/Snap-96948-Image Export-29.tif	0	TRUE	944.055
LRB401	d1	r3	../LRB401_d1_r3/Snap-96948-Image Export-29.tif	3	TRUE	899.131
LRB401	d1	r3	../LRB401_d1_r3/Snap-96948-Image Export-29.tif	4	TRUE	905.513
LRB401	d1	r3	../LRB401_d1_r3/Snap-96948-Image Export-29.tif	5	TRUE	906.547
LRB401	d1	r3	../LRB401_d1_r3/Snap-96970-Image Export-51.tif	2	TRUE	918.069
LRB401	d1	r3	../LRB401_d1_r3/Snap-96970-Image Export-51.tif	3	TRUE	904.532
LRB401	d1	r3	../LRB401_d1_r3/Snap-96970-Image Export-51.tif	4	TRUE	979.233
LRB401	d1	r3	../LRB401_d1_r3/Snap-96970-Image Export-51.tif	6	TRUE	857.962
LRB401	d1	r3	../LRB401_d1_r3/Snap-96976-Image Export-57.tif	0	TRUE	877.436
LRB401	d1	r3	../LRB401_d1_r3/Snap-96976-Image Export-57.tif	1	TRUE	891.899
LRB401	d1	r3	../LRB401_d1_r3/Snap-96976-Image Export-57.tif	2	TRUE	952.489
LRB401	d1	r3	../LRB401_d1_r3/Snap-96976-Image Export-57.tif	3	TRUE	839.522
LRB401	d1	r3	../LRB401_d1_r3/Snap-96976-Image Export-57.tif	5	TRUE	964.77
LRB401	d1	r3	../LRB401_d1_r3/Snap-96976-Image Export-57.tif	6	TRUE	911.596
LRB401	d1	r3	../LRB401_d1_r3/Snap-96971-Image Export-52.tif	0	TRUE	937.619
LRB401	d1	r3	../LRB401_d1_r3/Snap-96971-Image Export-52.tif	2	TRUE	938.968
LRB401	d1	r3	../LRB401_d1_r3/Snap-96971-Image Export-52.tif	3	TRUE	914.629
LRB401	d1	r3	../LRB401_d1_r3/Snap-96974-Image Export-55.tif	1	TRUE	886.184
LRB401	d1	r3	../LRB401_d1_r3/Snap-96973-Image Export-54.tif	0	TRUE	951.915
LRB401	d1	r3	../LRB401_d1_r3/Snap-96973-Image Export-54.tif	1	TRUE	949.271
LRB401	d1	r3	../LRB401_d1_r3/Snap-96973-Image Export-54.tif	3	TRUE	860.623
LRB401	d1	r3	../LRB401_d1_r3/Snap-96928-Image Export-09.tif	0	TRUE	908.508
LRB401	d1	r3	../LRB401_d1_r3/Snap-96937-Image Export-18.tif	0	TRUE	888.33
LRB401	d1	r3	../LRB401_d1_r3/Snap-96935-Image Export-16.tif	2	TRUE	864.933
LRB401	d1	r3	../LRB401_d1_r3/Snap-96932-Image Export-13.tif	0	TRUE	853.541
LRB401	d1	r3	../LRB401_d1_r3/Snap-96959-Image Export-40.tif	0	TRUE	925.117
LRB401	d1	r3	../LRB401_d1_r3/Snap-96983-Image Export-64.tif	0	TRUE	920.474
LRB401	d1	r3	../LRB401_d1_r3/Snap-96983-Image Export-64.tif	1	TRUE	899.718
LRB401	d1	r3	../LRB401_d1_r3/Snap-96931-Image Export-12.tif	0	TRUE	950.306
LRB401	d1	r3	../LRB401_d1_r3/Snap-96953-Image Export-34.tif	1	TRUE	945.257
LRB401	d1	r3	../LRB401_d1_r3/Snap-96953-Image Export-34.tif	2	TRUE	939.948
LRB401	d1	r3	../LRB401_d1_r3/Snap-96953-Image Export-34.tif	4	TRUE	962.716
LRB401	d1	r3	../LRB401_d1_r3/Snap-96934-Image Export-15.tif	0	TRUE	893.692
LRB401	d1	r3	../LRB401_d1_r3/Snap-96933-Image Export-14.tif	0	TRUE	919.402
LRB401	d1	r3	../LRB401_d1_r3/Snap-96980-Image Export-61.tif	0	TRUE	869.04
LRB401	d1	r3	../LRB401_d1_r3/Snap-96954-Image Export-35.tif	0	TRUE	881.856
LRB401	d1	r3	../LRB401_d1_r3/Snap-96954-Image Export-35.tif	1	TRUE	954.948
LRB401	d1	r3	../LRB401_d1_r3/Snap-96954-Image Export-35.tif	2	TRUE	944.943
LRB401	d1	r3	../LRB401_d1_r3/Snap-96982-Image Export-63.tif	0	TRUE	889.624
LRB401	d1	r3	../LRB401_d1_r3/Snap-96982-Image Export-63.tif	1	TRUE	928.112
LRB401	d1	r3	../LRB401_d1_r3/Snap-96982-Image Export-63.tif	2	TRUE	915.87
LRB401	d1	r3	../LRB401_d1_r3/Snap-96982-Image Export-63.tif	3	TRUE	836.489
LRB401	d1	r3	../LRB401_d1_r3/Snap-96951-Image Export-32.tif	0	TRUE	932.035
LRB401	d1	r3	../LRB401_d1_r3/Snap-96951-Image Export-32.tif	1	TRUE	864.397
LRB401	d1	r3	../LRB401_d1_r3/Snap-96950-Image Export-31.tif	0	TRUE	949.049
LRB401	d1	r3	../LRB401_d1_r3/Snap-96950-Image Export-31.tif	1	TRUE	944.001
LRB401	d1	r3	../LRB401_d1_r3/Snap-96984-Image Export-65.tif	0	TRUE	885.296
LRB401	d1	r3	../LRB401_d1_r3/Snap-96984-Image Export-65.tif	3	TRUE	930.61
LRB401	d1	r3	../LRB401_d1_r3/Snap-96984-Image Export-65.tif	5	TRUE	980.398
LRB401	d1	r3	../LRB401_d1_r3/Snap-96984-Image Export-65.tif	6	TRUE	893.914
LRB401	d1	r3	../LRB401_d1_r3/Snap-96968-Image Export-49.tif	1	TRUE	920.474
LRB401	d1	r3	../LRB401_d1_r3/Snap-96968-Image Export-49.tif	3	TRUE	940.523
LRB401	d1	r3	../LRB401_d1_r3/Snap-96968-Image Export-49.tif	5	TRUE	935.566
LRB401	d1	r3	../LRB401_d1_r3/Snap-96977-Image Export-58.tif	1	TRUE	846.754
LRB401	d1	r3	../LRB401_d1_r3/Snap-96977-Image Export-58.tif	2	TRUE	943.963
LRB401	d1	r3	../LRB401_d1_r3/Snap-96977-Image Export-58.tif	3	TRUE	850.822
LRB401	d1	r3	../LRB401_d1_r3/Snap-96977-Image Export-58.tif	4	TRUE	744.459
LRB401	d1	r3	../LRB401_d1_r3/Snap-96977-Image Export-58.tif	5	TRUE	922.435
LRB401	d1	r3	../LRB401_d1_r3/Snap-96977-Image Export-58.tif	6	TRUE	896.32
LRB401	d1	r3	../LRB401_d1_r3/Snap-96949-Image Export-30.tif	0	TRUE	911.228
LRB401	d1	r3	../LRB401_d1_r3/Snap-96949-Image Export-30.tif	1	TRUE	925.561
LRB401	d1	r3	../LRB401_d1_r3/Snap-96981-Image Export-62.tif	1	TRUE	880.285
LRB401	d1	r3	../LRB401_d1_r3/Snap-96981-Image Export-62.tif	2	TRUE	897.614
LRB401	d1	r3	../LRB401_d1_r3/Snap-96955-Image Export-36.tif	0	TRUE	869.078
LRB401	d1	r3	../LRB401_d1_r3/Snap-96955-Image Export-36.tif	1	TRUE	924.765
LRB401	d1	r3	../LRB401_d1_r3/Snap-96952-Image Export-33.tif	0	TRUE	894.711
LRB401	d1	r3	../LRB401_d1_r3/Snap-96952-Image Export-33.tif	1	TRUE	930.61
LRB401	d1	r3	../LRB401_d1_r3/Snap-96952-Image Export-33.tif	3	TRUE	905.383
LRB401	d1	r3	../LRB401_d1_r3/Snap-96946-Image Export-27.tif	0	TRUE	875.605
LRB401	d1	r3	../LRB401_d1_r3/Snap-96946-Image Export-27.tif	1	TRUE	906.547
LRB401	d1	r3	../LRB401_d1_r3/Snap-96946-Image Export-27.tif	2	TRUE	847.382
LRB401	d1	r3	../LRB401_d1_r3/Snap-96923-Image Export-04.tif	0	TRUE	870.15
LRB401	d1	r3	../LRB401_d1_r3/Snap-96944-Image Export-25.tif	0	TRUE	878.286
LRB401	d1	r3	../LRB401_d1_r3/Snap-96944-Image Export-25.tif	1	TRUE	894.397
LRB401	d1	r3	../LRB401_d1_r3/Snap-96967-Image Export-48.tif	0	TRUE	918.069
LRB401	d1	r3	../LRB401_d1_r3/Snap-96967-Image Export-48.tif	3	TRUE	891.363
LRB401	d1	r3	../LRB401_d1_r3/Snap-96945-Image Export-26.tif	0	TRUE	894.305
LRB401	d1	r3	../LRB401_d1_r3/Snap-96945-Image Export-26.tif	1	TRUE	848.991
LRB401	d1	r3	../LRB401_d1_r3/Snap-96945-Image Export-26.tif	4	TRUE	1056.39
LRB401	d1	r3	../LRB401_d1_r3/Snap-96942-Image Export-23.tif	4	TRUE	918.643
LRB401	d1	r3	../LRB401_d1_r3/Snap-96940-Image Export-21.tif	0	TRUE	945.571
LRB401	d1	r3	../LRB401_d1_r3/Snap-96940-Image Export-21.tif	2	TRUE	986.871
LRB401	d1	r3	../LRB401_d1_r3/Snap-96978-Image Export-59.tif	1	TRUE	958.426
LRB401	d1	r3	../LRB401_d1_r3/Snap-96978-Image Export-59.tif	2	TRUE	907.75
LRB401	d1	r3	../LRB401_d1_r3/Snap-96920-Image Export-01.tif	0	TRUE	995.045
LRB401	d1	r3	../LRB401_d1_r3/Snap-96920-Image Export-01.tif	1	TRUE	926.189
LRB401	d1	r3	../LRB401_d1_r3/Snap-96979-Image Export-60.tif	0	TRUE	906.899
LRB401	d1	r3	../LRB401_d1_r3/Snap-96979-Image Export-60.tif	1	TRUE	904.846
LRB401	d1	r3	../LRB401_d1_r3/Snap-96979-Image Export-60.tif	2	TRUE	947.717
LRB401	d1	r3	../LRB401_d1_r3/Snap-96925-Image Export-06.tif	0	TRUE	944.093
LRB401	d1	r3	../LRB401_d1_r3/Snap-96922-Image Export-03.tif	0	TRUE	911.374
LRB401	d1	r3	../LRB401_d1_r3/Snap-96922-Image Export-03.tif	1	TRUE	931.774
LRB401	d1	r3	../LRB401_d1_r3/Snap-96943-Image Export-24.tif	0	TRUE	918.774
LRB401	d1	r3	../LRB401_d1_r3/Snap-96943-Image Export-24.tif	1	TRUE	845.865
LRB401	d1	r3	../LRB401_d1_r3/Snap-96943-Image Export-24.tif	2	TRUE	908.952
LRB401	d1	r3	../LRB401_d1_r3/Snap-96924-Image Export-05.tif	0	TRUE	858.238
LRB401	d1	r3	../LRB401_d1_r3/Snap-96926-Image Export-07.tif	0	TRUE	928.649
LRB401	d1	r3	../LRB401_d1_r3/Snap-96921-Image Export-02.tif	0	TRUE	878.508
LRB401	d1	r3	../LRB401_d1_r3/Snap-96921-Image Export-02.tif	1	TRUE	940.464
LRB401	d1	r4	../LRB401_d1_r4/Snap-97636-Image Export-01.tif	1	TRUE	889.31
LRB401	d1	r4	../LRB401_d1_r4/Snap-97706-Image Export-71.tif	0	TRUE	982.765
LRB401	d1	r4	../LRB401_d1_r4/Snap-97706-Image Export-71.tif	1	TRUE	938.784
LRB401	d1	r4	../LRB401_d1_r4/Snap-97684-Image Export-49.tif	0	TRUE	900.112
LRB401	d1	r4	../LRB401_d1_r4/Snap-97707-Image Export-72.tif	0	TRUE	891.233
LRB401	d1	r4	../LRB401_d1_r4/Snap-97707-Image Export-72.tif	1	TRUE	927.89
LRB401	d1	r4	../LRB401_d1_r4/Snap-97637-Image Export-02.tif	0	TRUE	955.929
LRB401	d1	r4	../LRB401_d1_r4/Snap-97664-Image Export-29.tif	0	TRUE	945.886
LRB401	d1	r4	../LRB401_d1_r4/Snap-97664-Image Export-29.tif	1	TRUE	962.532
LRB401	d1	r4	../LRB401_d1_r4/Snap-97699-Image Export-64.tif	0	TRUE	906.585
LRB401	d1	r4	../LRB401_d1_r4/Snap-97705-Image Export-70.tif	0	TRUE	888.958
LRB401	d1	r4	../LRB401_d1_r4/Snap-97705-Image Export-70.tif	1	TRUE	895.653
LRB401	d1	r4	../LRB401_d1_r4/Snap-97654-Image Export-19.tif	0	TRUE	960.571
LRB401	d1	r4	../LRB401_d1_r4/Snap-97654-Image Export-19.tif	1	TRUE	902.977
LRB401	d1	r4	../LRB401_d1_r4/Snap-97653-Image Export-18.tif	1	TRUE	873.774
LRB401	d1	r4	../LRB401_d1_r4/Snap-97655-Image Export-20.tif	0	TRUE	933.697
LRB401	d1	r4	../LRB401_d1_r4/Snap-97701-Image Export-66.tif	0	TRUE	912.078
LRB401	d1	r4	../LRB401_d1_r4/Snap-97701-Image Export-66.tif	2	TRUE	904.272
LRB401	d1	r4	../LRB401_d1_r4/Snap-97701-Image Export-66.tif	3	TRUE	878.639
LRB401	d1	r4	../LRB401_d1_r4/Snap-97701-Image Export-66.tif	5	TRUE	492.187
LRB401	d1	r4	../LRB401_d1_r4/Snap-97663-Image Export-28.tif	0	TRUE	932.219
LRB401	d1	r4	../LRB401_d1_r4/Snap-97663-Image Export-28.tif	1	TRUE	925.431
LRB401	d1	r4	../LRB401_d1_r4/Snap-97657-Image Export-22.tif	0	TRUE	894.711
LRB401	d1	r4	../LRB401_d1_r4/Snap-97657-Image Export-22.tif	1	TRUE	948.513
LRB401	d1	r4	../LRB401_d1_r4/Snap-97700-Image Export-65.tif	0	TRUE	908.47
LRB401	d1	r4	../LRB401_d1_r4/Snap-97683-Image Export-48.tif	0	TRUE	920.697
LRB401	d1	r4	../LRB401_d1_r4/Snap-97683-Image Export-48.tif	1	TRUE	936.103
LRB401	d1	r4	../LRB401_d1_r4/Snap-97698-Image Export-63.tif	0	TRUE	926.91
LRB401	d1	r4	../LRB401_d1_r4/Snap-97698-Image Export-63.tif	1	TRUE	897.078
LRB401	d1	r4	../LRB401_d1_r4/Snap-97702-Image Export-67.tif	0	TRUE	887.073
LRB401	d1	r4	../LRB401_d1_r4/Snap-97702-Image Export-67.tif	1	TRUE	923.378
LRB401	d1	r4	../LRB401_d1_r4/Snap-97702-Image Export-67.tif	3	TRUE	930.388
LRB401	d1	r4	../LRB401_d1_r4/Snap-97720-Image Export-85.tif	0	TRUE	947.755
LRB401	d1	r4	../LRB401_d1_r4/Snap-97720-Image Export-85.tif	1	TRUE	863.731
LRB401	d1	r4	../LRB401_d1_r4/Snap-97711-Image Export-76.tif	1	TRUE	860.957
LRB401	d1	r4	../LRB401_d1_r4/Snap-97673-Image Export-38.tif	0	TRUE	893.102
LRB401	d1	r4	../LRB401_d1_r4/Snap-97658-Image Export-23.tif	0	TRUE	906.769
LRB401	d1	r4	../LRB401_d1_r4/Snap-97658-Image Export-23.tif	1	TRUE	902.387
LRB401	d1	r4	../LRB401_d1_r4/Snap-97696-Image Export-61.tif	0	TRUE	942.982
LRB401	d1	r4	../LRB401_d1_r4/Snap-97696-Image Export-61.tif	1	TRUE	922.934
LRB401	d1	r4	../LRB401_d1_r4/Snap-97696-Image Export-61.tif	2	TRUE	876.493
LRB401	d1	r4	../LRB401_d1_r4/Snap-97709-Image Export-74.tif	0	TRUE	908.286
LRB401	d1	r4	../LRB401_d1_r4/Snap-97709-Image Export-74.tif	1	TRUE	916.59
LRB401	d1	r4	../LRB401_d1_r4/Snap-97712-Image Export-77.tif	0	TRUE	880.914
LRB401	d1	r4	../LRB401_d1_r4/Snap-97639-Image Export-04.tif	0	TRUE	845.996
LRB401	d1	r4	../LRB401_d1_r4/Snap-97639-Image Export-04.tif	2	TRUE	946.996
LRB401	d1	r4	../LRB401_d1_r4/Snap-97697-Image Export-62.tif	2	TRUE	838.097
LRB401	d1	r4	../LRB401_d1_r4/Snap-97710-Image Export-75.tif	0	TRUE	953.47
LRB401	d1	r4	../LRB401_d1_r4/Snap-97710-Image Export-75.tif	1	TRUE	864.305
LRB401	d1	r4	../LRB401_d1_r4/Snap-97693-Image Export-58.tif	1	TRUE	904.088
LRB401	d1	r4	../LRB401_d1_r4/Snap-97693-Image Export-58.tif	2	TRUE	910.469
LRB401	d1	r4	../LRB401_d1_r4/Snap-97721-Image Export-86.tif	0	TRUE	929.223
LRB401	d1	r4	../LRB401_d1_r4/Snap-97721-Image Export-86.tif	1	TRUE	868.687
LRB401	d1	r4	../LRB401_d1_r4/Snap-97721-Image Export-86.tif	2	TRUE	890.383
LRB401	d1	r4	../LRB401_d1_r4/Snap-97721-Image Export-86.tif	3	TRUE	927.89
LRB401	d1	r4	../LRB401_d1_r4/Snap-97695-Image Export-60.tif	1	TRUE	872.203
LRB401	d1	r4	../LRB401_d1_r4/Snap-97695-Image Export-60.tif	2	TRUE	913.243
LRB401	d1	r4	../LRB401_d1_r4/Snap-97695-Image Export-60.tif	3	TRUE	901.184
LRB401	d1	r4	../LRB401_d1_r4/Snap-97694-Image Export-59.tif	1	TRUE	920.16
LRB401	d1	r4	../LRB401_d1_r4/Snap-97694-Image Export-59.tif	3	TRUE	875.957
LRB401	d1	r4	../LRB401_d1_r4/Snap-97659-Image Export-24.tif	0	TRUE	925.117
LRB401	d1	r4	../LRB401_d1_r4/Snap-97659-Image Export-24.tif	1	TRUE	884.89
LRB401	d1	r4	../LRB401_d1_r4/Snap-97659-Image Export-24.tif	2	TRUE	919.716
LRB401	d1	r4	../LRB401_d1_r4/Snap-97708-Image Export-73.tif	0	TRUE	936.287
LRB401	d1	r4	../LRB401_d1_r4/Snap-97708-Image Export-73.tif	1	TRUE	889.218
LRB401	d1	r4	../LRB401_d1_r4/Snap-97644-Image Export-09.tif	0	TRUE	844.165
LRB401	d1	r4	../LRB401_d1_r4/Snap-97638-Image Export-03.tif	0	TRUE	939.895
LRB401	d1	r4	../LRB401_d1_r4/Snap-97638-Image Export-03.tif	1	TRUE	945.886
LRB401	d1	r4	../LRB401_d1_r4/Snap-97638-Image Export-03.tif	2	TRUE	855.779
LRB401	d1	r4	../LRB401_d1_r4/Snap-97674-Image Export-39.tif	0	TRUE	919.18
LRB401	d1	r4	../LRB401_d1_r4/Snap-97674-Image Export-39.tif	1	TRUE	955.301
LRB401	d1	r4	../LRB401_d1_r4/Snap-97645-Image Export-10.tif	0	TRUE	941.059
LRB401	d1	r4	../LRB401_d1_r4/Snap-97714-Image Export-79.tif	0	TRUE	937.711
LRB401	d1	r4	../LRB401_d1_r4/Snap-97714-Image Export-79.tif	1	TRUE	948.383
LRB401	d1	r4	../LRB401_d1_r4/Snap-97714-Image Export-79.tif	2	TRUE	933.069
LRB401	d1	r4	../LRB401_d1_r4/Snap-97647-Image Export-12.tif	0	TRUE	926.373
LRB401	d1	r4	../LRB401_d1_r4/Snap-97647-Image Export-12.tif	1	TRUE	875.735
LRB401	d1	r4	../LRB401_d1_r4/Snap-97668-Image Export-33.tif	0	TRUE	949.9
LRB401	d1	r4	../LRB401_d1_r4/Snap-97668-Image Export-33.tif	1	TRUE	921.807
LRB401	d1	r4	../LRB401_d1_r4/Snap-97668-Image Export-33.tif	2	TRUE	878.194
LRB401	d1	r4	../LRB401_d1_r4/Snap-97679-Image Export-44.tif	0	TRUE	901.092
LRB401	d1	r4	../LRB401_d1_r4/Snap-97646-Image Export-11.tif	0	TRUE	912.262
LRB401	d1	r4	../LRB401_d1_r4/Snap-97688-Image Export-53.tif	0	TRUE	897.392
LRB401	d1	r4	../LRB401_d1_r4/Snap-97688-Image Export-53.tif	2	TRUE	933.107
LRB401	d1	r4	../LRB401_d1_r4/Snap-97642-Image Export-07.tif	0	TRUE	889.44
LRB401	d1	r4	../LRB401_d1_r4/Snap-97642-Image Export-07.tif	1	TRUE	916.368
LRB401	d1	r4	../LRB401_d1_r4/Snap-97691-Image Export-56.tif	1	TRUE	896.19
LRB401	d1	r4	../LRB401_d1_r4/Snap-97691-Image Export-56.tif	3	TRUE	919.624
LRB401	d1	r4	../LRB401_d1_r4/Snap-97691-Image Export-56.tif	5	TRUE	903.958
LRB401	d1	r4	../LRB401_d1_r4/Snap-97691-Image Export-56.tif	7	TRUE	913.243
LRB401	d1	r4	../LRB401_d1_r4/Snap-97691-Image Export-56.tif	8	TRUE	913.779
LRB401	d1	r4	../LRB401_d1_r4/Snap-97670-Image Export-35.tif	0	TRUE	895.653
LRB401	d1	r4	../LRB401_d1_r4/Snap-97717-Image Export-82.tif	0	TRUE	920.16
LRB401	d1	r4	../LRB401_d1_r4/Snap-97717-Image Export-82.tif	1	TRUE	929.981
LRB401	d1	r4	../LRB401_d1_r4/Snap-97717-Image Export-82.tif	2	TRUE	649.801
LRB401	d1	r4	../LRB401_d1_r4/Snap-97640-Image Export-05.tif	0	TRUE	938.6
LRB401	d1	r4	../LRB401_d1_r4/Snap-97672-Image Export-37.tif	0	TRUE	911.19
LRB401	d1	r4	../LRB401_d1_r4/Snap-97669-Image Export-34.tif	0	TRUE	933.827
LRB401	d1	r4	../LRB401_d1_r4/Snap-97715-Image Export-80.tif	1	TRUE	909.267
LRB401	d1	r4	../LRB401_d1_r4/Snap-97715-Image Export-80.tif	2	TRUE	860.551
LRB401	d1	r4	../LRB401_d1_r4/Snap-97689-Image Export-54.tif	0	TRUE	923.914
LRB401	d1	r4	../LRB401_d1_r4/Snap-97689-Image Export-54.tif	2	TRUE	891.141
LRB401	d1	r4	../LRB401_d1_r4/Snap-97689-Image Export-54.tif	3	TRUE	888.107
LRB401	d1	r4	../LRB401_d1_r4/Snap-97641-Image Export-06.tif	0	TRUE	922.083
LRB401	d1	r4	../LRB401_d1_r4/Snap-97641-Image Export-06.tif	1	TRUE	857.962
LRB401	d1	r4	../LRB401_d1_r4/Snap-97692-Image Export-57.tif	1	TRUE	859.885
LRB401	d1	r4	../LRB401_d1_r4/Snap-97678-Image Export-43.tif	0	TRUE	914.943
LRB401	d1	r4	../LRB401_d1_r4/Snap-97713-Image Export-78.tif	0	TRUE	919.938
LRB401	d1	r4	../LRB401_d1_r4/Snap-97713-Image Export-78.tif	1	TRUE	921.363
LRB401	d1	r4	../LRB401_d1_r4/Snap-97713-Image Export-78.tif	3	TRUE	895.784
LRB401	d1	r4	../LRB401_d1_r4/Snap-97690-Image Export-55.tif	0	TRUE	953.025
LRB401	d1	r4	../LRB401_d1_r4/Snap-97690-Image Export-55.tif	1	TRUE	951.064
LRB401	d1	r4	../LRB401_d1_r4/Snap-97690-Image Export-55.tif	2	TRUE	864.435
LRB401	d1	r4	../LRB401_d1_r4/Snap-97690-Image Export-55.tif	3	TRUE	940.615
LRB401	d1	r4	../LRB401_d1_r4/Snap-97671-Image Export-36.tif	0	TRUE	920.068
LRB401	d1	r4	../LRB401_d1_r4/Snap-97671-Image Export-36.tif	1	TRUE	916.813
LRB401	d1	r4	../LRB401_d1_r4/Snap-97716-Image Export-81.tif	0	TRUE	922.712
LRB401	d1	r4	../LRB401_d1_r4/Snap-97716-Image Export-81.tif	1	TRUE	933.199
LRB401	d1	r4	../LRB401_d1_r4/Snap-97716-Image Export-81.tif	2	TRUE	937.841
LRB401	d1	r4	../LRB401_d1_r4/Snap-97650-Image Export-15.tif	0	TRUE	921.195
LRB401	d1	r4	../LRB401_d1_r4/Snap-97650-Image Export-15.tif	1	TRUE	900.518
LRB401	d1	r4	../LRB401_d1_r4/Snap-97662-Image Export-27.tif	0	TRUE	921.011
LRB401	d1	r4	../LRB401_d1_r4/Snap-97662-Image Export-27.tif	1	TRUE	936.639
LRB401	d1	r4	../LRB401_d1_r4/Snap-97718-Image Export-83.tif	0	TRUE	921.233
LRB401	d1	r4	../LRB401_d1_r4/Snap-97649-Image Export-14.tif	0	TRUE	942.576
LRB401	d1	r4	../LRB401_d1_r4/Snap-97652-Image Export-17.tif	0	TRUE	902.349
LRB401	d1	r4	../LRB401_d1_r4/Snap-97681-Image Export-46.tif	0	TRUE	878.953
LRB401	d1	r4	../LRB401_d1_r4/Snap-97660-Image Export-25.tif	2	TRUE	929.001
LRB401	d1	r4	../LRB401_d1_r4/Snap-97660-Image Export-25.tif	3	TRUE	928.649
LRB401	d1	r4	../LRB401_d1_r4/Snap-97660-Image Export-25.tif	4	TRUE	889.126
LRB401	d1	r4	../LRB401_d1_r4/Snap-97676-Image Export-41.tif	0	TRUE	891.141
LRB401	d1	r4	../LRB401_d1_r4/Snap-97676-Image Export-41.tif	1	TRUE	928.02
LRB401	d1	r4	../LRB401_d1_r4/Snap-97677-Image Export-42.tif	0	TRUE	901.721
LRB401	d1	r4	../LRB401_d1_r4/Snap-97703-Image Export-68.tif	1	TRUE	868.725
LRB401	d1	r4	../LRB401_d1_r4/Snap-97703-Image Export-68.tif	2	TRUE	898.817
LRB401	d1	r4	../LRB401_d1_r4/Snap-97703-Image Export-68.tif	3	TRUE	909.136
LRB401	d1	r4	../LRB401_d1_r4/Snap-97703-Image Export-68.tif	4	TRUE	872.609
LRB401	d1	r4	../LRB401_d1_r4/Snap-97661-Image Export-26.tif	0	TRUE	938.026
LRB401	d1	r4	../LRB401_d1_r4/Snap-97661-Image Export-26.tif	1	TRUE	897.262
LRB401	d1	r4	../LRB401_d1_r4/Snap-97675-Image Export-40.tif	1	TRUE	892.436
LRB401	d1	r4	../LRB401_d1_r4/Snap-97675-Image Export-40.tif	2	TRUE	894.619
LRB401	d1	r4	../LRB401_d1_r4/Snap-97651-Image Export-16.tif	0	TRUE	925.431
LRB401	d1	r4	../LRB401_d1_r4/Snap-97651-Image Export-16.tif	3	TRUE	865.155
LRB401	d1	r4	../LRB401_d1_r4/Snap-97651-Image Export-16.tif	5	TRUE	903.087
LRB401	d1	r4	../LRB401_d1_r4/Snap-97682-Image Export-47.tif	0	TRUE	952.711
LRB401	d1	r4	../LRB401_d1_r4/Snap-97665-Image Export-30.tif	0	TRUE	959.943
LRB401	d1	r4	../LRB401_d1_r4/Snap-97665-Image Export-30.tif	1	TRUE	863.455
LRB401	d1	r4	../LRB401_d1_r4/Snap-97719-Image Export-84.tif	1	TRUE	896.948
LRB401	d1	r4	../LRB401_d1_r4/Snap-97719-Image Export-84.tif	2	TRUE	903.552
LRB401	d1	r4	../LRB401_d1_r4/Snap-97667-Image Export-32.tif	0	TRUE	849.251
LRB401	d1	r4	../LRB401_d1_r4/Snap-97686-Image Export-51.tif	0	TRUE	893.324
LRB401	d1	r4	../LRB401_d1_r4/Snap-97648-Image Export-13.tif	1	TRUE	905.383
LRB401	d1	r4	../LRB401_d1_r4/Snap-97704-Image Export-69.tif	0	TRUE	893.102
LRB401	d1	r4	../LRB401_d1_r4/Snap-97704-Image Export-69.tif	1	TRUE	925.079
LRB401	d1	r4	../LRB401_d1_r4/Snap-97704-Image Export-69.tif	2	TRUE	904.716
LRB401	d1	r4	../LRB401_d1_r4/Snap-97666-Image Export-31.tif	0	TRUE	927.262
LRB401	d1	r4	../LRB401_d1_r4/Snap-97666-Image Export-31.tif	1	TRUE	899.537
LRB401	d1	r4	../LRB401_d1_r4/Snap-97687-Image Export-52.tif	1	TRUE	655.608
LRB401	d1	r4	../LRB401_d1_r4/Snap-97687-Image Export-52.tif	2	TRUE	870.15
LRB401	d1	r4	../LRB401_d1_r4/Snap-97685-Image Export-50.tif	0	TRUE	869.706
LRB403	d1	r3	../LRB403_d1_r3/Snap-96906-Image Export-67.tif	1	TRUE	807.914
LRB403	d1	r3	../LRB403_d1_r3/Snap-96906-Image Export-67.tif	2	TRUE	857.962
LRB403	d1	r3	../LRB403_d1_r3/Snap-96906-Image Export-67.tif	4	TRUE	878.547
LRB403	d1	r3	../LRB403_d1_r3/Snap-96904-Image Export-65.tif	0	TRUE	811.169
LRB403	d1	r3	../LRB403_d1_r3/Snap-96904-Image Export-65.tif	1	TRUE	855.503
LRB403	d1	r3	../LRB403_d1_r3/Snap-96913-Image Export-74.tif	0	TRUE	844.701
LRB403	d1	r3	../LRB403_d1_r3/Snap-96913-Image Export-74.tif	1	TRUE	874.977
LRB403	d1	r3	../LRB403_d1_r3/Snap-96913-Image Export-74.tif	3	TRUE	834.121
LRB403	d1	r3	../LRB403_d1_r3/Snap-96913-Image Export-74.tif	4	TRUE	850.692
LRB403	d1	r3	../LRB403_d1_r3/Snap-96916-Image Export-77.tif	0	TRUE	923.156
LRB403	d1	r3	../LRB403_d1_r3/Snap-96916-Image Export-77.tif	2	TRUE	819.696
LRB403	d1	r3	../LRB403_d1_r3/Snap-96915-Image Export-76.tif	1	TRUE	817.329
LRB403	d1	r3	../LRB403_d1_r3/Snap-96912-Image Export-73.tif	2	TRUE	800.812
LRB403	d1	r3	../LRB403_d1_r3/Snap-96909-Image Export-70.tif	0	TRUE	874.44
LRB403	d1	r3	../LRB403_d1_r3/Snap-96909-Image Export-70.tif	1	TRUE	460.931
LRB403	d1	r3	../LRB403_d1_r3/Snap-96909-Image Export-70.tif	2	TRUE	871.499
LRB403	d1	r3	../LRB403_d1_r3/Snap-96917-Image Export-78.tif	0	TRUE	878.639
LRB403	d1	r3	../LRB403_d1_r3/Snap-96917-Image Export-78.tif	1	TRUE	853.411
LRB403	d1	r3	../LRB403_d1_r3/Snap-96840-Image Export-01.tif	0	TRUE	880.784
LRB403	d1	r3	../LRB403_d1_r3/Snap-96840-Image Export-01.tif	1	TRUE	752.725
LRB403	d1	r3	../LRB403_d1_r3/Snap-96840-Image Export-01.tif	4	TRUE	847.068
LRB403	d1	r3	../LRB403_d1_r3/Snap-96908-Image Export-69.tif	0	TRUE	821.803
LRB403	d1	r3	../LRB403_d1_r3/Snap-96908-Image Export-69.tif	1	TRUE	875.605
LRB403	d1	r3	../LRB403_d1_r3/Snap-96919-Image Export-80.tif	0	TRUE	811.353
LRB403	d1	r3	../LRB403_d1_r3/Snap-96919-Image Export-80.tif	2	TRUE	827.334
LRB403	d1	r3	../LRB403_d1_r3/Snap-96919-Image Export-80.tif	3	TRUE	830.551
LRB403	d1	r3	../LRB403_d1_r3/Snap-96907-Image Export-68.tif	0	TRUE	771.831
LRB403	d1	r3	../LRB403_d1_r3/Snap-96907-Image Export-68.tif	1	TRUE	842.61
LRB403	d1	r4	../LRB403_d1_r4/Snap-97608-Image Export-54.tif	0	TRUE	864.267
LRB403	d1	r4	../LRB403_d1_r4/Snap-97608-Image Export-54.tif	2	TRUE	800.368
LRB403	d1	r4	../LRB403_d1_r4/Snap-97609-Image Export-55.tif	0	TRUE	798.223
LRB403	d1	r4	../LRB403_d1_r4/Snap-97609-Image Export-55.tif	1	TRUE	832.29
LRB403	d1	r4	../LRB403_d1_r4/Snap-97609-Image Export-55.tif	2	TRUE	850.508
LRB403	d1	r4	../LRB403_d1_r4/Snap-97587-Image Export-33.tif	0	TRUE	838.894
LRB403	d1	r4	../LRB403_d1_r4/Snap-97587-Image Export-33.tif	1	TRUE	805.584
LRB403	d1	r4	../LRB403_d1_r4/Snap-97587-Image Export-33.tif	2	TRUE	768.039
LRB403	d1	r4	../LRB403_d1_r4/Snap-97559-Image Export-05.tif	0	TRUE	825.503
LRB403	d1	r4	../LRB403_d1_r4/Snap-97559-Image Export-05.tif	1	TRUE	813.629
LRB403	d1	r4	../LRB403_d1_r4/Snap-97610-Image Export-56.tif	0	TRUE	814.831
LRB403	d1	r4	../LRB403_d1_r4/Snap-97586-Image Export-32.tif	0	TRUE	769.648
LRB403	d1	r4	../LRB403_d1_r4/Snap-97586-Image Export-32.tif	1	TRUE	873.498
LRB403	d1	r4	../LRB403_d1_r4/Snap-97558-Image Export-04.tif	0	TRUE	755.536
LRB403	d1	r4	../LRB403_d1_r4/Snap-97611-Image Export-57.tif	1	TRUE	819.696
LRB403	d1	r4	../LRB403_d1_r4/Snap-97611-Image Export-57.tif	3	TRUE	833.769
LRB403	d1	r4	../LRB403_d1_r4/Snap-97585-Image Export-31.tif	0	TRUE	848.807
LRB403	d1	r4	../LRB403_d1_r4/Snap-97620-Image Export-66.tif	0	TRUE	863.861
LRB403	d1	r4	../LRB403_d1_r4/Snap-97620-Image Export-66.tif	1	TRUE	803.493
LRB403	d1	r4	../LRB403_d1_r4/Snap-97621-Image Export-67.tif	0	TRUE	827.426
LRB403	d1	r4	../LRB403_d1_r4/Snap-97621-Image Export-67.tif	1	TRUE	789.29
LRB403	d1	r4	../LRB403_d1_r4/Snap-97595-Image Export-41.tif	0	TRUE	798.039
LRB403	d1	r4	../LRB403_d1_r4/Snap-97595-Image Export-41.tif	1	TRUE	818.049
LRB403	d1	r4	../LRB403_d1_r4/Snap-97626-Image Export-72.tif	0	TRUE	823.097
LRB403	d1	r4	../LRB403_d1_r4/Snap-97626-Image Export-72.tif	1	TRUE	859.793
LRB403	d1	r4	../LRB403_d1_r4/Snap-97626-Image Export-72.tif	2	TRUE	795.319
LRB403	d1	r4	../LRB403_d1_r4/Snap-97626-Image Export-72.tif	3	TRUE	808.58
LRB403	d1	r4	../LRB403_d1_r4/Snap-97627-Image Export-73.tif	1	TRUE	860.107
LRB403	d1	r4	../LRB403_d1_r4/Snap-97627-Image Export-73.tif	2	TRUE	828.276
LRB403	d1	r4	../LRB403_d1_r4/Snap-97627-Image Export-73.tif	3	TRUE	852.653
LRB403	d1	r4	../LRB403_d1_r4/Snap-97627-Image Export-73.tif	4	TRUE	780.097
LRB403	d1	r4	../LRB403_d1_r4/Snap-97627-Image Export-73.tif	5	TRUE	801.662
LRB403	d1	r4	../LRB403_d1_r4/Snap-97627-Image Export-73.tif	6	TRUE	834.213
LRB403	d1	r4	../LRB403_d1_r4/Snap-97594-Image Export-40.tif	4	TRUE	753.169
LRB403	d1	r4	../LRB403_d1_r4/Snap-97597-Image Export-43.tif	0	TRUE	852.561
LRB403	d1	r4	../LRB403_d1_r4/Snap-97597-Image Export-43.tif	1	TRUE	790.807
LRB403	d1	r4	../LRB403_d1_r4/Snap-97597-Image Export-43.tif	2	TRUE	851.711
LRB403	d1	r4	../LRB403_d1_r4/Snap-97597-Image Export-43.tif	3	TRUE	813.353
LRB403	d1	r4	../LRB403_d1_r4/Snap-97624-Image Export-70.tif	0	TRUE	831.976
LRB403	d1	r4	../LRB403_d1_r4/Snap-97581-Image Export-27.tif	0	TRUE	832.827
LRB403	d1	r4	../LRB403_d1_r4/Snap-97581-Image Export-27.tif	1	TRUE	809.967
LRB403	d1	r4	../LRB403_d1_r4/Snap-97581-Image Export-27.tif	2	TRUE	776.251
LRB403	d1	r4	../LRB403_d1_r4/Snap-97625-Image Export-71.tif	0	TRUE	811.169
LRB403	d1	r4	../LRB403_d1_r4/Snap-97625-Image Export-71.tif	1	TRUE	805.454
LRB403	d1	r4	../LRB403_d1_r4/Snap-97625-Image Export-71.tif	3	TRUE	838.764
LRB403	d1	r4	../LRB403_d1_r4/Snap-97596-Image Export-42.tif	0	TRUE	731.382
LRB403	d1	r4	../LRB403_d1_r4/Snap-97596-Image Export-42.tif	1	TRUE	846.272
LRB403	d1	r4	../LRB403_d1_r4/Snap-97596-Image Export-42.tif	2	TRUE	820.416
LRB403	d1	r4	../LRB403_d1_r4/Snap-97580-Image Export-26.tif	0	TRUE	841.667
LRB403	d1	r4	../LRB403_d1_r4/Snap-97577-Image Export-23.tif	1	TRUE	830.774
LRB403	d1	r4	../LRB403_d1_r4/Snap-97577-Image Export-23.tif	2	TRUE	796.077
LRB403	d1	r4	../LRB403_d1_r4/Snap-97576-Image Export-22.tif	0	TRUE	789.382
LRB403	d1	r4	../LRB403_d1_r4/Snap-97572-Image Export-18.tif	0	TRUE	793.932
LRB403	d1	r4	../LRB403_d1_r4/Snap-97572-Image Export-18.tif	2	TRUE	821.305
LRB403	d1	r4	../LRB403_d1_r4/Snap-97575-Image Export-21.tif	0	TRUE	826.261
LRB403	d1	r4	../LRB403_d1_r4/Snap-97574-Image Export-20.tif	0	TRUE	823.136
LRB403	d1	r4	../LRB403_d1_r4/Snap-97573-Image Export-19.tif	0	TRUE	840.02
LRB403	d1	r4	../LRB403_d1_r4/Snap-97573-Image Export-19.tif	1	TRUE	811.353
LRB403	d1	r4	../LRB403_d1_r4/Snap-97591-Image Export-37.tif	0	TRUE	839.652
LRB403	d1	r4	../LRB403_d1_r4/Snap-97591-Image Export-37.tif	1	TRUE	773.754
LRB403	d1	r4	../LRB403_d1_r4/Snap-97591-Image Export-37.tif	2	TRUE	839.078
LRB403	d1	r4	../LRB403_d1_r4/Snap-97591-Image Export-37.tif	3	TRUE	799.425
LRB403	d1	r4	../LRB403_d1_r4/Snap-97607-Image Export-53.tif	0	TRUE	862.474
LRB403	d1	r4	../LRB403_d1_r4/Snap-97607-Image Export-53.tif	1	TRUE	768.039
LRB403	d1	r4	../LRB403_d1_r4/Snap-97607-Image Export-53.tif	2	TRUE	896.412
LRB403	d1	r4	../LRB403_d1_r4/Snap-97590-Image Export-36.tif	0	TRUE	842.87
LRB403	d1	r4	../LRB403_d1_r4/Snap-97590-Image Export-36.tif	1	TRUE	822.913
LRB403	d1	r4	../LRB403_d1_r4/Snap-97604-Image Export-50.tif	0	TRUE	847.29
LRB403	d1	r4	../LRB403_d1_r4/Snap-97605-Image Export-51.tif	0	TRUE	620.246
LRB403	d1	r4	../LRB403_d1_r4/Snap-97605-Image Export-51.tif	1	TRUE	835.324
LRB403	d1	r4	../LRB403_d1_r4/Snap-97605-Image Export-51.tif	2	TRUE	847.788
LRB403	d1	r4	../LRB403_d1_r4/Snap-97605-Image Export-51.tif	3	TRUE	812.686
LRB403	d1	r4	../LRB403_d1_r4/Snap-97589-Image Export-35.tif	0	TRUE	795.947
LRB403	d1	r4	../LRB403_d1_r4/Snap-97589-Image Export-35.tif	1	TRUE	844.885
LRB403	d1	r4	../LRB403_d1_r4/Snap-97589-Image Export-35.tif	2	TRUE	790.899
LRB403	d1	r4	../LRB403_d1_r4/Snap-97562-Image Export-08.tif	0	TRUE	843.72
LRB403	d1	r4	../LRB403_d1_r4/Snap-97557-Image Export-03.tif	0	TRUE	809.246
LRB403	d1	r4	../LRB403_d1_r4/Snap-97588-Image Export-34.tif	0	TRUE	844.479
LRB403	d1	r4	../LRB403_d1_r4/Snap-97588-Image Export-34.tif	1	TRUE	827.112
LRB403	d1	r4	../LRB403_d1_r4/Snap-97563-Image Export-09.tif	0	TRUE	829.571
LRB403	d1	r4	../LRB403_d1_r4/Snap-97555-Image Export-01.tif	1	TRUE	832.697
LRB403	d1	r4	../LRB403_d1_r4/Snap-97628-Image Export-74.tif	0	TRUE	836.619
LRB403	d1	r4	../LRB403_d1_r4/Snap-97628-Image Export-74.tif	1	TRUE	829.203
LRB403	d1	r4	../LRB403_d1_r4/Snap-97628-Image Export-74.tif	2	TRUE	819.696
LRB403	d1	r4	../LRB403_d1_r4/Snap-97628-Image Export-74.tif	3	TRUE	804.604
LRB403	d1	r4	../LRB403_d1_r4/Snap-97629-Image Export-75.tif	0	TRUE	829.479
LRB403	d1	r4	../LRB403_d1_r4/Snap-97629-Image Export-75.tif	2	TRUE	808.044
LRB403	d1	r4	../LRB403_d1_r4/Snap-97629-Image Export-75.tif	3	TRUE	794.875
LRB403	d1	r4	../LRB403_d1_r4/Snap-97629-Image Export-75.tif	4	TRUE	804.512
LRB403	d1	r4	../LRB403_d1_r4/Snap-97599-Image Export-45.tif	0	TRUE	810.319
LRB403	d1	r4	../LRB403_d1_r4/Snap-97599-Image Export-45.tif	1	TRUE	794.116
LRB403	d1	r4	../LRB403_d1_r4/Snap-97630-Image Export-76.tif	1	TRUE	799.609
LRB403	d1	r4	../LRB403_d1_r4/Snap-97579-Image Export-25.tif	0	TRUE	792.416
LRB403	d1	r4	../LRB403_d1_r4/Snap-97579-Image Export-25.tif	1	TRUE	798.575
LRB403	d1	r4	../LRB403_d1_r4/Snap-97579-Image Export-25.tif	3	TRUE	786.126
LRB403	d1	r4	../LRB403_d1_r4/Snap-97631-Image Export-77.tif	1	TRUE	775.048
LRB403	d1	r4	../LRB403_d1_r4/Snap-97631-Image Export-77.tif	2	TRUE	778.396
LRB403	d1	r4	../LRB403_d1_r4/Snap-97578-Image Export-24.tif	0	TRUE	836.397
LRB403	d1	r4	../LRB403_d1_r4/Snap-97600-Image Export-46.tif	0	TRUE	852.209
LRB403	d1	r4	../LRB403_d1_r4/Snap-97600-Image Export-46.tif	1	TRUE	849.657
LRB403	d1	r4	../LRB403_d1_r4/Snap-97601-Image Export-47.tif	1	TRUE	848.769
LRB403	d1	r4	../LRB403_d1_r4/Snap-97602-Image Export-48.tif	1	TRUE	825.281
LRB403	d1	r4	../LRB403_d1_r4/Snap-97602-Image Export-48.tif	2	TRUE	822.561
LRB403	d1	r4	../LRB403_d1_r4/Snap-97603-Image Export-49.tif	0	TRUE	838.005
LRB403	d1	r4	../LRB403_d1_r4/Snap-97603-Image Export-49.tif	1	TRUE	804.03
LRB403	d1	r4	../LRB403_d1_r4/Snap-97603-Image Export-49.tif	2	TRUE	816.532
LRB403	d1	r4	../LRB403_d1_r4/Snap-97632-Image Export-78.tif	0	TRUE	602.38
LRB403	d1	r4	../LRB403_d1_r4/Snap-97632-Image Export-78.tif	1	TRUE	832.827
LRB403	d1	r4	../LRB403_d1_r4/Snap-97633-Image Export-79.tif	0	TRUE	803.807
LRB403	d1	r4	../LRB403_d1_r4/Snap-97633-Image Export-79.tif	2	TRUE	857.832
LRB403	d1	r4	../LRB403_d1_r4/Snap-97633-Image Export-79.tif	3	TRUE	685.033
LRB403	d1	r4	../LRB403_d1_r4/Snap-97566-Image Export-12.tif	0	TRUE	885.02
LRB403	d1	r4	../LRB403_d1_r4/Snap-97566-Image Export-12.tif	1	TRUE	786.57
LRB403	d1	r4	../LRB403_d1_r4/Snap-97567-Image Export-13.tif	0	TRUE	815.72
LRB403	d1	r4	../LRB403_d1_r4/Snap-97564-Image Export-10.tif	0	TRUE	805.546
LRB403	d1	r4	../LRB403_d1_r4/Snap-97635-Image Export-81.tif	2	TRUE	826.261
LRB403	d1	r4	../LRB403_d1_r4/Snap-97635-Image Export-81.tif	3	TRUE	845.773
LRB403	d1	r4	../LRB403_d1_r4/Snap-97635-Image Export-81.tif	4	TRUE	820.102
LRB403	d1	r4	../LRB403_d1_r4/Snap-97635-Image Export-81.tif	5	TRUE	878.861
LRB403	d1	r4	../LRB403_d1_r4/Snap-97635-Image Export-81.tif	6	TRUE	835.638
LRB403	d1	r4	../LRB403_d1_r4/Snap-97565-Image Export-11.tif	0	TRUE	853.856
LRB403	d1	r4	../LRB403_d1_r4/Snap-97634-Image Export-80.tif	0	TRUE	827.648
LRB403	d1	r4	../LRB403_d1_r4/Snap-97634-Image Export-80.tif	1	TRUE	880.247
LRB403	d1	r4	../LRB403_d1_r4/Snap-97634-Image Export-80.tif	2	TRUE	791.435
LRB403	d1	r4	../LRB403_d1_r4/Snap-97619-Image Export-65.tif	0	TRUE	845.735
LRB403	d1	r4	../LRB403_d1_r4/Snap-97619-Image Export-65.tif	2	TRUE	790.769
LRB403	d1	r4	../LRB403_d1_r4/Snap-97618-Image Export-64.tif	0	TRUE	791.121
LRB403	d1	r4	../LRB403_d1_r4/Snap-97618-Image Export-64.tif	1	TRUE	814.295
LRB403	d1	r4	../LRB403_d1_r4/Snap-97618-Image Export-64.tif	3	TRUE	798.667
LRB403	d1	r4	../LRB403_d1_r4/Snap-97618-Image Export-64.tif	4	TRUE	777.73
LRB403	d1	r4	../LRB403_d1_r4/Snap-97560-Image Export-06.tif	1	TRUE	873.276
LRB403	d1	r4	../LRB403_d1_r4/Snap-97560-Image Export-06.tif	2	TRUE	808.488
LRB403	d1	r4	../LRB403_d1_r4/Snap-97560-Image Export-06.tif	3	TRUE	820.01
LRB403	d1	r4	../LRB403_d1_r4/Snap-97593-Image Export-39.tif	1	TRUE	864.749
LRB403	d1	r4	../LRB403_d1_r4/Snap-97592-Image Export-38.tif	0	TRUE	810.059
LRB403	d1	r4	../LRB403_d1_r4/Snap-97592-Image Export-38.tif	1	TRUE	833.455
LRB403	d1	r4	../LRB403_d1_r4/Snap-97592-Image Export-38.tif	3	TRUE	781.116
LRB403	d1	r4	../LRB403_d1_r4/Snap-97570-Image Export-16.tif	0	TRUE	790.232
LRB403	d1	r4	../LRB403_d1_r4/Snap-97570-Image Export-16.tif	1	TRUE	781.522
LRB403	d1	r4	../LRB403_d1_r4/Snap-97570-Image Export-16.tif	2	TRUE	804.826
LRB403	d1	r4	../LRB403_d1_r4/Snap-97570-Image Export-16.tif	5	TRUE	768.039
LRB403	d1	r4	../LRB403_d1_r4/Snap-97571-Image Export-17.tif	0	TRUE	778.396
LRB403	d1	r4	../LRB403_d1_r4/Snap-97571-Image Export-17.tif	1	TRUE	851.874
LRB403	d1	r4	../LRB403_d1_r4/Snap-97568-Image Export-14.tif	0	TRUE	866.71
LRB403	d1	r4	../LRB403_d1_r4/Snap-97568-Image Export-14.tif	1	TRUE	778.044
LRB403	d1	r4	../LRB403_d1_r4/Snap-97568-Image Export-14.tif	2	TRUE	906.233
LRB403	d1	r4	../LRB403_d1_r4/Snap-97583-Image Export-29.tif	0	TRUE	813.537
LRB403	d1	r4	../LRB403_d1_r4/Snap-97583-Image Export-29.tif	1	TRUE	871.759
LRB403	d1	r4	../LRB403_d1_r4/Snap-97569-Image Export-15.tif	0	TRUE	728.164
LRB403	d1	r4	../LRB403_d1_r4/Snap-97569-Image Export-15.tif	2	TRUE	821.489
LRB403	d1	r4	../LRB403_d1_r4/Snap-97582-Image Export-28.tif	0	TRUE	785.368
LRB403	d1	r4	../LRB403_d1_r4/Snap-97582-Image Export-28.tif	1	TRUE	711.149
LRB403	d1	r4	../LRB403_d1_r4/Snap-97617-Image Export-63.tif	0	TRUE	797.686
LRB403	d1	r4	../LRB403_d1_r4/Snap-97617-Image Export-63.tif	1	TRUE	857.924
LRB403	d1	r4	../LRB403_d1_r4/Snap-97617-Image Export-63.tif	2	TRUE	859.126
LRB403	d1	r4	../LRB403_d1_r4/Snap-97617-Image Export-63.tif	3	TRUE	759.106
LRB403	d1	r4	../LRB403_d1_r4/Snap-97617-Image Export-63.tif	4	TRUE	824.967
LRB403	d1	r4	../LRB403_d1_r4/Snap-97622-Image Export-68.tif	1	TRUE	809.653
LRB403	d1	r4	../LRB403_d1_r4/Snap-97623-Image Export-69.tif	0	TRUE	806.213
LRB403	d1	r4	../LRB403_d1_r4/Snap-97623-Image Export-69.tif	1	TRUE	800.498
LRB403	d1	r4	../LRB403_d1_r4/Snap-97616-Image Export-62.tif	2	TRUE	746.382
LRB403	d1	r4	../LRB403_d1_r4/Snap-97616-Image Export-62.tif	3	TRUE	862.918
LRB403	d1	r4	../LRB403_d1_r4/Snap-97615-Image Export-61.tif	0	TRUE	874.126
LRB403	d1	r4	../LRB403_d1_r4/Snap-97615-Image Export-61.tif	1	TRUE	633.637
LRB403	d1	r4	../LRB403_d1_r4/Snap-97615-Image Export-61.tif	3	TRUE	757.497
LRB403	d1	r4	../LRB403_d1_r4/Snap-97612-Image Export-58.tif	0	TRUE	806.749
LRB403	d1	r4	../LRB403_d1_r4/Snap-97612-Image Export-58.tif	1	TRUE	818.401
LRB403	d1	r4	../LRB403_d1_r4/Snap-97612-Image Export-58.tif	3	TRUE	827.832
LRB403	d1	r4	../LRB403_d1_r4/Snap-97613-Image Export-59.tif	1	TRUE	851.933
LRB403	d1	r4	../LRB403_d1_r4/Snap-97614-Image Export-60.tif	1	TRUE	821.489
LRB403	d1	r4	../LRB403_d1_r4/Snap-97614-Image Export-60.tif	4	TRUE	818.585
LRB403	d1	r4	../LRB403_d1_r4/Snap-97614-Image Export-60.tif	5	TRUE	855.242
LRB396	d8	r4	../LRB396_d8_r4/Snap-98877.tif	0	TRUE	582.501
LRB396	d8	r4	../LRB396_d8_r4/Snap-98863.tif	0	TRUE	569
LRB396	d8	r4	../LRB396_d8_r4/Snap-98862.tif	0	TRUE	612.518
LRB396	d8	r4	../LRB396_d8_r4/Snap-98876.tif	1	TRUE	577.559
LRB396	d8	r4	../LRB396_d8_r4/Snap-98874.tif	0	TRUE	609.824
LRB396	d8	r4	../LRB396_d8_r4/Snap-98861.tif	0	TRUE	622.859
LRB396	d8	r4	../LRB396_d8_r4/Snap-98865.tif	0	TRUE	600.36
LRB396	d8	r4	../LRB396_d8_r4/Snap-98871.tif	0	TRUE	601.703
LRB396	d8	r4	../LRB396_d8_r4/Snap-98870.tif	0	TRUE	583.314
LRB396	d8	r4	../LRB396_d8_r4/Snap-98864.tif	0	TRUE	605.941
LRB396	d8	r4	../LRB396_d8_r4/Snap-98872.tif	0	TRUE	596.414
LRB396	d8	r4	../LRB396_d8_r4/Snap-98867.tif	1	TRUE	604.462
LRB396	d8	r4	../LRB396_d8_r4/Snap-98867.tif	2	TRUE	556.276
LRB396	d8	r4	../LRB396_d8_r4/Snap-98873.tif	0	TRUE	425.784
LRB396	d8	r4	../LRB396_d8_r4/Snap-98880.tif	0	TRUE	592.558
LRB396	d8	r4	../LRB396_d8_r4/Snap-98868.tif	0	TRUE	549.506
LRB396	d8	r4	../LRB396_d8_r4/Snap-98878.tif	0	TRUE	584.2
LRB396	d8	r3	../LRB396_d8_r3/Snap-98419.tif	0	TRUE	716.428
LRB396	d8	r3	../LRB396_d8_r3/Snap-98394.tif	0	TRUE	757.716
LRB396	d8	r3	../LRB396_d8_r3/Snap-98395.tif	0	TRUE	705.702
LRB396	d8	r3	../LRB396_d8_r3/Snap-98418.tif	0	TRUE	714.4
LRB396	d8	r3	../LRB396_d8_r3/Snap-98397.tif	0	TRUE	750.792
LRB396	d8	r3	../LRB396_d8_r3/Snap-98397.tif	1	TRUE	630.797
LRB396	d8	r3	../LRB396_d8_r3/Snap-98396.tif	0	TRUE	622.458
LRB396	d8	r3	../LRB396_d8_r3/Snap-98396.tif	1	TRUE	796.64
LRB396	d8	r3	../LRB396_d8_r3/Snap-98392.tif	0	TRUE	759.525
LRB396	d8	r3	../LRB396_d8_r3/Snap-98408.tif	0	TRUE	640.343
LRB396	d8	r3	../LRB396_d8_r3/Snap-98391.tif	0	TRUE	829.517
LRB396	d8	r3	../LRB396_d8_r3/Snap-98404.tif	0	TRUE	694.595
LRB396	d8	r3	../LRB396_d8_r3/Snap-98405.tif	0	TRUE	808.351
LRB396	d8	r3	../LRB396_d8_r3/Snap-98411.tif	0	TRUE	830.047
LRB396	d8	r3	../LRB396_d8_r3/Snap-98411.tif	1	TRUE	724.037
LRB396	d8	r3	../LRB396_d8_r3/Snap-98411.tif	2	TRUE	794.43
LRB396	d8	r3	../LRB396_d8_r3/Snap-98413.tif	0	TRUE	695.225
LRB396	d8	r3	../LRB396_d8_r3/Snap-98412.tif	1	TRUE	696.011
LRB396	d8	r3	../LRB396_d8_r3/Snap-98406.tif	0	TRUE	715.504
LRB396	d8	r3	../LRB396_d8_r3/Snap-98402.tif	0	TRUE	664.76
LRB396	d8	r3	../LRB396_d8_r3/Snap-98416.tif	0	TRUE	669.127
LRB396	d8	r3	../LRB396_d8_r3/Snap-98417.tif	0	TRUE	639.11
LRB396	d8	r3	../LRB396_d8_r3/Snap-98403.tif	0	TRUE	655.142
LRB396	d8	r3	../LRB396_d8_r3/Snap-98415.tif	0	TRUE	617.278
LRB396	d8	r3	../LRB396_d8_r3/Snap-98398.tif	0	TRUE	377.269
LRB396	d8	r3	../LRB396_d8_r3/Snap-98399.tif	1	TRUE	706.871
LRB396	d8	r3	../LRB396_d8_r3/Snap-98414.tif	0	TRUE	731.627
LRB395	d8	r4	../LRB395_d8_r4/Snap-98860.tif	0	TRUE	460.259
LRB395	d8	r4	../LRB395_d8_r4/Snap-98860.tif	1	TRUE	429.776
LRB395	d8	r4	../LRB395_d8_r4/Snap-98859.tif	0	TRUE	406.226
LRB395	d8	r4	../LRB395_d8_r4/Snap-98858.tif	0	TRUE	458.643
LRB395	d8	r4	../LRB395_d8_r4/Snap-98843.tif	0	TRUE	483.389
LRB395	d8	r4	../LRB395_d8_r4/Snap-98857.tif	0	TRUE	378.283
LRB395	d8	r4	../LRB395_d8_r4/Snap-98855.tif	0	TRUE	461.912
LRB395	d8	r4	../LRB395_d8_r4/Snap-98844.tif	0	TRUE	403.577
LRB395	d8	r4	../LRB395_d8_r4/Snap-98850.tif	0	TRUE	402.764
LRB395	d8	r4	../LRB395_d8_r4/Snap-98850.tif	2	TRUE	436.216
LRB395	d8	r4	../LRB395_d8_r4/Snap-98851.tif	0	TRUE	452.339
LRB395	d8	r4	../LRB395_d8_r4/Snap-98845.tif	0	TRUE	494.195
LRB395	d8	r4	../LRB395_d8_r4/Snap-98853.tif	0	TRUE	448.877
LRB395	d8	r4	../LRB395_d8_r4/Snap-98847.tif	0	TRUE	293.511
LRB395	d8	r4	../LRB395_d8_r4/Snap-98852.tif	0	TRUE	416.064
LRB395	d8	r4	../LRB395_d8_r4/Snap-98852.tif	1	TRUE	369.091
LRB395	d8	r3	../LRB395_d8_r3/Snap-98357.tif	0	TRUE	661.582
LRB395	d8	r3	../LRB395_d8_r3/Snap-98343.tif	0	TRUE	673.047
LRB395	d8	r3	../LRB395_d8_r3/Snap-98380.tif	0	TRUE	680.353
LRB395	d8	r3	../LRB395_d8_r3/Snap-98381.tif	0	TRUE	683.021
LRB395	d8	r3	../LRB395_d8_r3/Snap-98342.tif	0	TRUE	616.135
LRB395	d8	r3	../LRB395_d8_r3/Snap-98356.tif	0	TRUE	735.244
LRB395	d8	r3	../LRB395_d8_r3/Snap-98368.tif	0	TRUE	571.585
LRB395	d8	r3	../LRB395_d8_r3/Snap-98383.tif	0	TRUE	652.785
LRB395	d8	r3	../LRB395_d8_r3/Snap-98355.tif	0	TRUE	602.078
LRB395	d8	r3	../LRB395_d8_r3/Snap-98341.tif	0	TRUE	831.452
LRB395	d8	r3	../LRB395_d8_r3/Snap-98369.tif	0	TRUE	544.08
LRB395	d8	r3	../LRB395_d8_r3/Snap-98345.tif	0	TRUE	639.375
LRB395	d8	r3	../LRB395_d8_r3/Snap-98379.tif	0	TRUE	641.248
LRB395	d8	r3	../LRB395_d8_r3/Snap-98386.tif	0	TRUE	603.539
LRB395	d8	r3	../LRB395_d8_r3/Snap-98387.tif	0	TRUE	796.156
LRB395	d8	r3	../LRB395_d8_r3/Snap-98378.tif	0	TRUE	484.009
LRB395	d8	r3	../LRB395_d8_r3/Snap-98378.tif	1	TRUE	432.115
LRB395	d8	r3	../LRB395_d8_r3/Snap-98350.tif	0	TRUE	473.751
LRB395	d8	r3	../LRB395_d8_r3/Snap-98344.tif	0	TRUE	641.823
LRB395	d8	r3	../LRB395_d8_r3/Snap-98344.tif	1	TRUE	634.305
LRB395	d8	r3	../LRB395_d8_r3/Snap-98344.tif	2	TRUE	569.905
LRB395	d8	r3	../LRB395_d8_r3/Snap-98385.tif	0	TRUE	602.763
LRB395	d8	r3	../LRB395_d8_r3/Snap-98384.tif	0	TRUE	568.452
LRB395	d8	r3	../LRB395_d8_r3/Snap-98390.tif	0	TRUE	631.637
LRB395	d8	r3	../LRB395_d8_r3/Snap-98347.tif	0	TRUE	648.683
LRB395	d8	r3	../LRB395_d8_r3/Snap-98337.tif	0	TRUE	708.709
LRB395	d8	r3	../LRB395_d8_r3/Snap-98336.tif	0	TRUE	675.211
LRB395	d8	r3	../LRB395_d8_r3/Snap-98336.tif	1	TRUE	637.877
LRB395	d8	r3	../LRB395_d8_r3/Snap-98338.tif	0	TRUE	630.615
LRB395	d8	r3	../LRB395_d8_r3/Snap-98339.tif	0	TRUE	610.618
LRB395	d8	r3	../LRB395_d8_r3/Snap-98389.tif	0	TRUE	661.782
LRB395	d8	r3	../LRB395_d8_r3/Snap-98388.tif	0	TRUE	676.8
LRB395	d8	r3	../LRB395_d8_r3/Snap-98363.tif	0	TRUE	431.301
LRB395	d8	r3	../LRB395_d8_r3/Snap-98377.tif	0	TRUE	621.16
LRB395	d8	r3	../LRB395_d8_r3/Snap-98349.tif	0	TRUE	585.169
LRB395	d8	r3	../LRB395_d8_r3/Snap-98361.tif	0	TRUE	699.136
LRB395	d8	r3	../LRB395_d8_r3/Snap-98375.tif	0	TRUE	621.909
LRB395	d8	r3	../LRB395_d8_r3/Snap-98375.tif	1	TRUE	536.032
LRB395	d8	r3	../LRB395_d8_r3/Snap-98374.tif	0	TRUE	604.307
LRB395	d8	r3	../LRB395_d8_r3/Snap-98374.tif	1	TRUE	554.403
LRB395	d8	r3	../LRB395_d8_r3/Snap-98364.tif	0	TRUE	675.256
LRB395	d8	r3	../LRB395_d8_r3/Snap-98370.tif	0	TRUE	625.855
LRB395	d8	r3	../LRB395_d8_r3/Snap-98358.tif	0	TRUE	655.187
LRB395	d8	r3	../LRB395_d8_r3/Snap-98359.tif	0	TRUE	687.452
LRB395	d8	r3	../LRB395_d8_r3/Snap-98359.tif	1	TRUE	596.879
LRB395	d8	r3	../LRB395_d8_r3/Snap-98371.tif	0	TRUE	659.58
LRB395	d8	r3	../LRB395_d8_r3/Snap-98365.tif	0	TRUE	678.299
LRB395	d8	r3	../LRB395_d8_r3/Snap-98373.tif	0	TRUE	659.947
LRB395	d8	r3	../LRB395_d8_r3/Snap-98367.tif	0	TRUE	555.92
LRB395	d8	r3	../LRB395_d8_r3/Snap-98366.tif	0	TRUE	721.808
LRB395	d8	r3	../LRB395_d8_r3/Snap-98372.tif	0	TRUE	564.414
EG4725	d8	r4	../EG4725_d8_r4/Snap-98829.tif	0	TRUE	469.714
EG4725	d8	r4	../EG4725_d8_r4/Snap-98817.tif	0	TRUE	575.422
EG4725	d8	r4	../EG4725_d8_r4/Snap-98838.tif	0	TRUE	381.371
EG4725	d8	r4	../EG4725_d8_r4/Snap-98842.tif	0	TRUE	571.101
EG4725	d8	r4	../EG4725_d8_r4/Snap-98840.tif	0	TRUE	438.619
EG4725	d8	r4	../EG4725_d8_r4/Snap-98835.tif	0	TRUE	470.645
EG4725	d8	r4	../EG4725_d8_r4/Snap-98821.tif	0	TRUE	595.839
EG4725	d8	r4	../EG4725_d8_r4/Snap-98820.tif	0	TRUE	433.768
EG4725	d8	r4	../EG4725_d8_r4/Snap-98834.tif	0	TRUE	463.1
EG4725	d8	r4	../EG4725_d8_r4/Snap-98836.tif	0	TRUE	550.721
EG4725	d8	r4	../EG4725_d8_r4/Snap-98827.tif	0	TRUE	404.947
EG4725	d8	r4	../EG4725_d8_r4/Snap-98833.tif	0	TRUE	462.086
EG4725	d8	r4	../EG4725_d8_r4/Snap-98833.tif	1	TRUE	490.843
EG4725	d8	r4	../EG4725_d8_r4/Snap-98832.tif	0	TRUE	549.945
EG4725	d8	r4	../EG4725_d8_r4/Snap-98818.tif	0	TRUE	599.218
EG4725	d8	r4	../EG4725_d8_r4/Snap-98830.tif	0	TRUE	377.178
EG4725	d8	r4	../EG4725_d8_r4/Snap-98824.tif	0	TRUE	555.946
EG4725	d8	r4	../EG4725_d8_r4/Snap-98831.tif	0	TRUE	454.897
EG4725	d8	r3	../EG4725_d8_r3/Snap-98237.tif	0	TRUE	633.885
EG4725	d8	r3	../EG4725_d8_r3/Snap-98234.tif	0	TRUE	740.443
EG4725	d8	r3	../EG4725_d8_r3/Snap-98235.tif	1	TRUE	584.858
EG4725	d8	r3	../EG4725_d8_r3/Snap-98231.tif	0	TRUE	533.675
EG4725	d8	r3	../EG4725_d8_r3/Snap-98225.tif	0	TRUE	658.054
EG4725	d8	r3	../EG4725_d8_r3/Snap-98224.tif	0	TRUE	595.729
EG4725	d8	r3	../EG4725_d8_r3/Snap-98226.tif	0	TRUE	613.24
EG4725	d8	r3	../EG4725_d8_r3/Snap-98232.tif	0	TRUE	535.064
EG4725	d8	r3	../EG4725_d8_r3/Snap-98233.tif	1	TRUE	690.21
EG4725	d8	r3	../EG4725_d8_r3/Snap-98227.tif	0	TRUE	613.395
EG4725	d8	r3	../EG4725_d8_r3/Snap-98240.tif	0	TRUE	500.261
EG4725	d8	r3	../EG4725_d8_r3/Snap-98240.tif	1	TRUE	439.304
EG4725	d8	r3	../EG4725_d8_r3/Snap-98255.tif	0	TRUE	736.697
EG4725	d8	r3	../EG4725_d8_r3/Snap-98241.tif	0	TRUE	388.934
EG4725	d8	r3	../EG4725_d8_r3/Snap-98269.tif	0	TRUE	678.847
EG4725	d8	r3	../EG4725_d8_r3/Snap-98257.tif	1	TRUE	603.748
EG4725	d8	r3	../EG4725_d8_r3/Snap-98243.tif	0	TRUE	694.641
EG4725	d8	r3	../EG4725_d8_r3/Snap-98242.tif	1	TRUE	618.292
EG4725	d8	r3	../EG4725_d8_r3/Snap-98256.tif	0	TRUE	720.155
EG4725	d8	r3	../EG4725_d8_r3/Snap-98252.tif	0	TRUE	557.509
EG4725	d8	r3	../EG4725_d8_r3/Snap-98247.tif	0	TRUE	681.515
EG4725	d8	r3	../EG4725_d8_r3/Snap-98253.tif	0	TRUE	643.412
EG4725	d8	r3	../EG4725_d8_r3/Snap-98245.tif	0	TRUE	530.277
EG4725	d8	r3	../EG4725_d8_r3/Snap-98251.tif	0	TRUE	817.038
EG4725	d8	r3	../EG4725_d8_r3/Snap-98250.tif	0	TRUE	820.913
EG4725	d8	r3	../EG4725_d8_r3/Snap-98250.tif	1	TRUE	643.696
EG4725	d8	r3	../EG4725_d8_r3/Snap-98250.tif	2	TRUE	614.72
EG4725	d8	r3	../EG4725_d8_r3/Snap-98244.tif	0	TRUE	673.667
EG4725	d8	r3	../EG4725_d8_r3/Snap-98244.tif	1	TRUE	665.373
EG4725	d8	r3	../EG4725_d8_r3/Snap-98249.tif	0	TRUE	662.925
EG4725	d8	r3	../EG4725_d8_r3/Snap-98261.tif	0	TRUE	585.214
EG4725	d8	r3	../EG4725_d8_r3/Snap-98261.tif	1	TRUE	661.518
EG4725	d8	r3	../EG4725_d8_r3/Snap-98260.tif	0	TRUE	639.923
EG4725	d8	r3	../EG4725_d8_r3/Snap-98248.tif	0	TRUE	591.453
EG4725	d8	r3	../EG4725_d8_r3/Snap-98248.tif	1	TRUE	507.915
EG4725	d8	r3	../EG4725_d8_r3/Snap-98276.tif	0	TRUE	652.629
EG4725	d8	r3	../EG4725_d8_r3/Snap-98277.tif	0	TRUE	491.198
EG4725	d8	r3	../EG4725_d8_r3/Snap-98273.tif	1	TRUE	637.254
EG4725	d8	r3	../EG4725_d8_r3/Snap-98264.tif	0	TRUE	430.726
EG4725	d8	r3	../EG4725_d8_r3/Snap-98270.tif	0	TRUE	580.163
EG4725	d8	r3	../EG4725_d8_r3/Snap-98259.tif	0	TRUE	640.408
EG4725	d8	r3	../EG4725_d8_r3/Snap-98259.tif	1	TRUE	686.108
EG4725	d8	r3	../EG4725_d8_r3/Snap-98271.tif	0	TRUE	660.367
EG4725	d8	r3	../EG4725_d8_r3/Snap-98265.tif	0	TRUE	654.438
EG4725	d8	r3	../EG4725_d8_r3/Snap-98228.tif	0	TRUE	594.477
EG4725	d8	r3	../EG4725_d8_r3/Snap-98238.tif	0	TRUE	571.32
EG4725	d8	r3	../EG4725_d8_r3/Snap-98239.tif	0	TRUE	651.945
LRB401	d8	r4	../LRB401_d8_r4/Snap-98784.tif	0	TRUE	638.141
LRB401	d8	r4	../LRB401_d8_r4/Snap-98784.tif	1	TRUE	576.034
LRB401	d8	r4	../LRB401_d8_r4/Snap-98785.tif	0	TRUE	557.18
LRB401	d8	r4	../LRB401_d8_r4/Snap-98778.tif	1	TRUE	609.869
LRB401	d8	r4	../LRB401_d8_r4/Snap-98778.tif	2	TRUE	470.07
LRB401	d8	r4	../LRB401_d8_r4/Snap-98787.tif	0	TRUE	613.569
LRB401	d8	r4	../LRB401_d8_r4/Snap-98786.tif	0	TRUE	545.844
LRB401	d8	r4	../LRB401_d8_r4/Snap-98779.tif	0	TRUE	475.011
LRB401	d8	r4	../LRB401_d8_r4/Snap-98779.tif	1	TRUE	576.171
LRB401	d8	r4	../LRB401_d8_r4/Snap-98769.tif	0	TRUE	604.352
LRB401	d8	r4	../LRB401_d8_r4/Snap-98782.tif	0	TRUE	646.08
LRB401	d8	r4	../LRB401_d8_r4/Snap-98782.tif	1	TRUE	613.906
LRB401	d8	r4	../LRB401_d8_r4/Snap-98783.tif	0	TRUE	574.755
LRB401	d8	r4	../LRB401_d8_r4/Snap-98783.tif	1	TRUE	593.372
LRB401	d8	r4	../LRB401_d8_r4/Snap-98768.tif	1	TRUE	657.9
LRB401	d8	r4	../LRB401_d8_r4/Snap-98781.tif	0	TRUE	600.077
LRB401	d8	r4	../LRB401_d8_r4/Snap-98780.tif	0	TRUE	575.596
LRB401	d8	r4	../LRB401_d8_r4/Snap-98766.tif	0	TRUE	673.247
LRB401	d8	r4	../LRB401_d8_r4/Snap-98772.tif	0	TRUE	469.43
LRB401	d8	r4	../LRB401_d8_r4/Snap-98773.tif	0	TRUE	623.846
LRB401	d8	r4	../LRB401_d8_r4/Snap-98773.tif	1	TRUE	520.001
LRB401	d8	r4	../LRB401_d8_r4/Snap-98767.tif	0	TRUE	571.448
LRB401	d8	r4	../LRB401_d8_r4/Snap-98767.tif	1	TRUE	610.747
LRB401	d8	r4	../LRB401_d8_r4/Snap-98765.tif	0	TRUE	644.362
LRB401	d8	r4	../LRB401_d8_r4/Snap-98764.tif	0	TRUE	609.339
LRB401	d8	r4	../LRB401_d8_r4/Snap-98770.tif	0	TRUE	620.959
LRB401	d8	r4	../LRB401_d8_r4/Snap-98774.tif	0	TRUE	684.364
LRB401	d8	r4	../LRB401_d8_r4/Snap-98761.tif	0	TRUE	605.147
LRB401	d8	r4	../LRB401_d8_r4/Snap-98775.tif	2	TRUE	629.537
LRB401	d8	r4	../LRB401_d8_r4/Snap-98763.tif	0	TRUE	478.364
LRB401	d8	r4	../LRB401_d8_r4/Snap-98777.tif	1	TRUE	572.353
LRB401	d8	r4	../LRB401_d8_r4/Snap-98788.tif	0	TRUE	628.184
LRB401	d8	r4	../LRB401_d8_r4/Snap-98789.tif	0	TRUE	569.246
LRB401	d8	r4	../LRB401_d8_r4/Snap-98776.tif	0	TRUE	579.213
LRB401	d8	r4	../LRB401_d8_r4/Snap-98776.tif	1	TRUE	649.167
LRB401	d8	r3	../LRB401_d8_r3/Snap-98425.tif	0	TRUE	680.682
LRB401	d8	r3	../LRB401_d8_r3/Snap-98424.tif	0	TRUE	754.666
LRB401	d8	r3	../LRB401_d8_r3/Snap-98430.tif	0	TRUE	820.254
LRB401	d8	r3	../LRB401_d8_r3/Snap-98426.tif	0	TRUE	836.998
LRB401	d8	r3	../LRB401_d8_r3/Snap-98432.tif	1	TRUE	728.01
LRB401	d8	r3	../LRB401_d8_r3/Snap-98433.tif	0	TRUE	859.89
LRB401	d8	r3	../LRB401_d8_r3/Snap-98433.tif	1	TRUE	741.018
LRB401	d8	r3	../LRB401_d8_r3/Snap-98436.tif	0	TRUE	655.142
LRB401	d8	r3	../LRB401_d8_r3/Snap-98434.tif	0	TRUE	659.819
LRB401	d8	r3	../LRB401_d8_r3/Snap-98420.tif	0	TRUE	768.186
LRB401	d8	r3	../LRB401_d8_r3/Snap-98420.tif	1	TRUE	706.525
LRB401	d8	r3	../LRB401_d8_r3/Snap-98421.tif	0	TRUE	671.885
LRB401	d8	r3	../LRB401_d8_r3/Snap-98452.tif	0	TRUE	513.496
LRB401	d8	r3	../LRB401_d8_r3/Snap-98452.tif	1	TRUE	815.915
LRB401	d8	r3	../LRB401_d8_r3/Snap-98446.tif	0	TRUE	713.942
LRB401	d8	r3	../LRB401_d8_r3/Snap-98446.tif	1	TRUE	689.48
LRB401	d8	r3	../LRB401_d8_r3/Snap-98447.tif	0	TRUE	736.213
LRB401	d8	r3	../LRB401_d8_r3/Snap-98447.tif	1	TRUE	808.214
LRB401	d8	r3	../LRB401_d8_r3/Snap-98453.tif	0	TRUE	806.387
LRB401	d8	r3	../LRB401_d8_r3/Snap-98445.tif	0	TRUE	682.911
LRB401	d8	r3	../LRB401_d8_r3/Snap-98451.tif	1	TRUE	802.962
LRB401	d8	r3	../LRB401_d8_r3/Snap-98450.tif	0	TRUE	818.919
LRB401	d8	r3	../LRB401_d8_r3/Snap-98450.tif	1	TRUE	821.405
LRB401	d8	r3	../LRB401_d8_r3/Snap-98444.tif	0	TRUE	705.693
LRB401	d8	r3	../LRB401_d8_r3/Snap-98440.tif	0	TRUE	740.708
LRB401	d8	r3	../LRB401_d8_r3/Snap-98454.tif	0	TRUE	806.005
LRB401	d8	r3	../LRB401_d8_r3/Snap-98468.tif	0	TRUE	824.035
LRB401	d8	r3	../LRB401_d8_r3/Snap-98455.tif	0	TRUE	809.713
LRB401	d8	r3	../LRB401_d8_r3/Snap-98441.tif	0	TRUE	732.989
LRB401	d8	r3	../LRB401_d8_r3/Snap-98457.tif	0	TRUE	821.715
LRB401	d8	r3	../LRB401_d8_r3/Snap-98443.tif	0	TRUE	673.932
LRB401	d8	r3	../LRB401_d8_r3/Snap-98442.tif	0	TRUE	732.861
LRB401	d8	r3	../LRB401_d8_r3/Snap-98456.tif	0	TRUE	745.998
LRB401	d8	r3	../LRB401_d8_r3/Snap-98467.tif	0	TRUE	659.974
LRB401	d8	r3	../LRB401_d8_r3/Snap-98466.tif	0	TRUE	728.048
LRB401	d8	r3	../LRB401_d8_r3/Snap-98458.tif	0	TRUE	808.616
LRB401	d8	r3	../LRB401_d8_r3/Snap-98464.tif	0	TRUE	727.938
LRB401	d8	r3	../LRB401_d8_r3/Snap-98465.tif	0	TRUE	733.92
LRB401	d8	r3	../LRB401_d8_r3/Snap-98459.tif	0	TRUE	855.606
LRB401	d8	r3	../LRB401_d8_r3/Snap-98459.tif	1	TRUE	713.696
LRB401	d8	r3	../LRB401_d8_r3/Snap-98461.tif	0	TRUE	745.01
LRB401	d8	r3	../LRB401_d8_r3/Snap-98449.tif	0	TRUE	767.747
LRB401	d8	r3	../LRB401_d8_r3/Snap-98448.tif	0	TRUE	750.281
LRB401	d8	r3	../LRB401_d8_r3/Snap-98460.tif	0	TRUE	699.618
LRB401	d8	r3	../LRB401_d8_r3/Snap-98462.tif	0	TRUE	755.817
LRB401	d8	r3	../LRB401_d8_r3/Snap-98463.tif	0	TRUE	811.42
LRB401	d8	r3	../LRB401_d8_r3/Snap-98438.tif	0	TRUE	822.502
LRB401	d8	r3	../LRB401_d8_r3/Snap-98439.tif	0	TRUE	676.07
LRB401	d8	r3	../LRB401_d8_r3/Snap-98429.tif	0	TRUE	819.441
LRB403	d8	r3	../LRB403_d8_r3/Snap-98491.tif	0	TRUE	546.529
LRB403	d8	r3	../LRB403_d8_r3/Snap-98526.tif	0	TRUE	689.654
LRB403	d8	r3	../LRB403_d8_r3/Snap-98526.tif	1	TRUE	572.773
LRB403	d8	r3	../LRB403_d8_r3/Snap-98527.tif	0	TRUE	594.057
LRB403	d8	r3	../LRB403_d8_r3/Snap-98484.tif	0	TRUE	421.18
LRB403	d8	r3	../LRB403_d8_r3/Snap-98490.tif	0	TRUE	584.419
LRB403	d8	r3	../LRB403_d8_r3/Snap-98490.tif	1	TRUE	537.175
LRB403	d8	r3	../LRB403_d8_r3/Snap-98486.tif	0	TRUE	538.015
LRB403	d8	r3	../LRB403_d8_r3/Snap-98519.tif	0	TRUE	656.704
LRB403	d8	r3	../LRB403_d8_r3/Snap-98525.tif	0	TRUE	617.607
LRB403	d8	r3	../LRB403_d8_r3/Snap-98524.tif	1	TRUE	648.017
LRB403	d8	r3	../LRB403_d8_r3/Snap-98530.tif	1	TRUE	587.48
LRB403	d8	r3	../LRB403_d8_r3/Snap-98518.tif	0	TRUE	468.151
LRB403	d8	r3	../LRB403_d8_r3/Snap-98518.tif	2	TRUE	637.328
LRB403	d8	r3	../LRB403_d8_r3/Snap-98487.tif	0	TRUE	599.675
LRB403	d8	r3	../LRB403_d8_r3/Snap-98478.tif	0	TRUE	654.987
LRB403	d8	r3	../LRB403_d8_r3/Snap-98483.tif	0	TRUE	585.214
LRB403	d8	r3	../LRB403_d8_r3/Snap-98497.tif	0	TRUE	669.986
LRB403	d8	r3	../LRB403_d8_r3/Snap-98520.tif	0	TRUE	583.379
LRB403	d8	r3	../LRB403_d8_r3/Snap-98508.tif	0	TRUE	617.232
LRB403	d8	r3	../LRB403_d8_r3/Snap-98509.tif	0	TRUE	651.214
LRB403	d8	r3	../LRB403_d8_r3/Snap-98521.tif	1	TRUE	616.51
LRB403	d8	r3	../LRB403_d8_r3/Snap-98496.tif	0	TRUE	641.32
LRB403	d8	r3	../LRB403_d8_r3/Snap-98482.tif	0	TRUE	590.11
LRB403	d8	r3	../LRB403_d8_r3/Snap-98482.tif	1	TRUE	446.073
LRB403	d8	r3	../LRB403_d8_r3/Snap-98469.tif	0	TRUE	517.708
LRB403	d8	r3	../LRB403_d8_r3/Snap-98494.tif	0	TRUE	505.422
LRB403	d8	r3	../LRB403_d8_r3/Snap-98480.tif	0	TRUE	618.401
LRB403	d8	r3	../LRB403_d8_r3/Snap-98523.tif	0	TRUE	441.313
LRB403	d8	r3	../LRB403_d8_r3/Snap-98522.tif	0	TRUE	693.691
LRB403	d8	r3	../LRB403_d8_r3/Snap-98481.tif	1	TRUE	551.315
LRB403	d8	r3	../LRB403_d8_r3/Snap-98513.tif	0	TRUE	614.811
LRB403	d8	r3	../LRB403_d8_r3/Snap-98512.tif	0	TRUE	565.054
LRB403	d8	r3	../LRB403_d8_r3/Snap-98499.tif	0	TRUE	617.789
LRB403	d8	r3	../LRB403_d8_r3/Snap-98499.tif	1	TRUE	650.821
LRB403	d8	r3	../LRB403_d8_r3/Snap-98472.tif	0	TRUE	585.853
LRB403	d8	r3	../LRB403_d8_r3/Snap-98470.tif	0	TRUE	525.226
LRB403	d8	r3	../LRB403_d8_r3/Snap-98510.tif	1	TRUE	513.625
LRB403	d8	r3	../LRB403_d8_r3/Snap-98510.tif	2	TRUE	597.364
LRB403	d8	r3	../LRB403_d8_r3/Snap-98504.tif	0	TRUE	465.064
LRB403	d8	r3	../LRB403_d8_r3/Snap-98511.tif	0	TRUE	616.948
LRB403	d8	r3	../LRB403_d8_r3/Snap-98475.tif	0	TRUE	616.793
LRB403	d8	r3	../LRB403_d8_r3/Snap-98501.tif	0	TRUE	706.681
LRB403	d8	r3	../LRB403_d8_r3/Snap-98529.tif	0	TRUE	567.767
LRB403	d8	r3	../LRB403_d8_r3/Snap-98528.tif	0	TRUE	602.15
LRB403	d8	r3	../LRB403_d8_r3/Snap-98500.tif	0	TRUE	572.909
LRB403	d8	r3	../LRB403_d8_r3/Snap-98514.tif	0	TRUE	592.952
LRB403	d8	r3	../LRB403_d8_r3/Snap-98474.tif	1	TRUE	623.207
LRB403	d8	r3	../LRB403_d8_r3/Snap-98489.tif	0	TRUE	633.794
LRB403	d8	r3	../LRB403_d8_r3/Snap-98516.tif	0	TRUE	658.403
LRB403	d8	r3	../LRB403_d8_r3/Snap-98488.tif	0	TRUE	598.332
LRB403	d8	r4	../LRB403_d8_r4/Snap-98735-Image Export-21.tif	0	TRUE	566.753
LRB403	d8	r4	../LRB403_d8_r4/Snap-98732-Image Export-18.tif	0	TRUE	310.557
LRB403	d8	r4	../LRB403_d8_r4/Snap-98732-Image Export-18.tif	1	TRUE	472.673
LRB403	d8	r4	../LRB403_d8_r4/Snap-98734-Image Export-20.tif	0	TRUE	420.979
LRB403	d8	r4	../LRB403_d8_r4/Snap-98737-Image Export-23.tif	0	TRUE	357.136
LRB403	d8	r4	../LRB403_d8_r4/Snap-98736-Image Export-22.tif	0	TRUE	455.253
LRB403	d8	r4	../LRB403_d8_r4/Snap-98753-Image Export-39.tif	0	TRUE	466.498
LRB403	d8	r4	../LRB403_d8_r4/Snap-98752-Image Export-38.tif	0	TRUE	448.941
LRB403	d8	r4	../LRB403_d8_r4/Snap-98719-Image Export-05.tif	0	TRUE	409.514
LRB403	d8	r4	../LRB403_d8_r4/Snap-98719-Image Export-05.tif	1	TRUE	485.553
LRB403	d8	r4	../LRB403_d8_r4/Snap-98719-Image Export-05.tif	2	TRUE	452.229
LRB403	d8	r4	../LRB403_d8_r4/Snap-98718-Image Export-04.tif	0	TRUE	471.988
LRB403	d8	r4	../LRB403_d8_r4/Snap-98742-Image Export-28.tif	0	TRUE	418.531
LRB403	d8	r4	../LRB403_d8_r4/Snap-98742-Image Export-28.tif	1	TRUE	529.108
LRB403	d8	r4	../LRB403_d8_r4/Snap-98739-Image Export-25.tif	0	TRUE	317.152
LRB403	d8	r4	../LRB403_d8_r4/Snap-98738-Image Export-24.tif	0	TRUE	415.05
LRB403	d8	r4	../LRB403_d8_r4/Snap-98715-Image Export-01.tif	0	TRUE	384.833
LRB403	d8	r4	../LRB403_d8_r4/Snap-98722-Image Export-08.tif	0	TRUE	462.761
LRB403	d8	r4	../LRB403_d8_r4/Snap-98722-Image Export-08.tif	2	TRUE	415.553
LRB403	d8	r4	../LRB403_d8_r4/Snap-98716-Image Export-02.tif	0	TRUE	428.653
LRB403	d8	r4	../LRB403_d8_r4/Snap-98723-Image Export-09.tif	0	TRUE	428.013
LRB403	d8	r4	../LRB403_d8_r4/Snap-98723-Image Export-09.tif	1	TRUE	445.899
LRB403	d8	r4	../LRB403_d8_r4/Snap-98747-Image Export-33.tif	0	TRUE	468.151
LRB403	d8	r4	../LRB403_d8_r4/Snap-98720-Image Export-06.tif	0	TRUE	434.253
LRB403	d8	r4	../LRB403_d8_r4/Snap-98721-Image Export-07.tif	0	TRUE	418.001
LRB403	d8	r4	../LRB403_d8_r4/Snap-98744-Image Export-30.tif	0	TRUE	424.067
LRB403	d8	r4	../LRB403_d8_r4/Snap-98755-Image Export-41.tif	0	TRUE	479.579
LRB403	d8	r4	../LRB403_d8_r4/Snap-98755-Image Export-41.tif	1	TRUE	434.809
LRB403	d8	r4	../LRB403_d8_r4/Snap-98724-Image Export-10.tif	0	TRUE	526.66
LRB403	d8	r4	../LRB403_d8_r4/Snap-98754-Image Export-40.tif	1	TRUE	291.063
LRB403	d8	r4	../LRB403_d8_r4/Snap-98725-Image Export-11.tif	0	TRUE	546.903
LRB403	d8	r4	../LRB403_d8_r4/Snap-98726-Image Export-12.tif	0	TRUE	401.75
LRB403	d8	r4	../LRB403_d8_r4/Snap-98757-Image Export-43.tif	0	TRUE	443.076
LRB403	d8	r4	../LRB403_d8_r4/Snap-98749-Image Export-35.tif	2	TRUE	433.046
LRB403	d8	r4	../LRB403_d8_r4/Snap-98748-Image Export-34.tif	0	TRUE	502.864
LRB403	d8	r4	../LRB403_d8_r4/Snap-98751-Image Export-37.tif	0	TRUE	467.841
LRB403	d8	r4	../LRB403_d8_r4/Snap-98750-Image Export-36.tif	0	TRUE	461.447
LRB403	d8	r4	../LRB403_d8_r4/Snap-98730-Image Export-16.tif	0	TRUE	558.202
LRB403	d8	r4	../LRB403_d8_r4/Snap-98730-Image Export-16.tif	1	TRUE	317.326
LRB403	d8	r4	../LRB403_d8_r4/Snap-98759-Image Export-45.tif	0	TRUE	544.436
LRB403	d8	r4	../LRB403_d8_r4/Snap-98729-Image Export-15.tif	0	TRUE	498.698
LRB407	d1	r3	../LRB407_d1_r3/Snap-96827-Image Export-76.tif	1	TRUE	814.517
LRB407	d1	r3	../LRB407_d1_r3/Snap-96827-Image Export-76.tif	2	TRUE	833.807
LRB407	d1	r3	../LRB407_d1_r3/Snap-96827-Image Export-76.tif	3	TRUE	800.276
LRB407	d1	r3	../LRB407_d1_r3/Snap-96825-Image Export-74.tif	0	TRUE	798.039
LRB407	d1	r3	../LRB407_d1_r3/Snap-96825-Image Export-74.tif	2	TRUE	728.922
LRB407	d1	r3	../LRB407_d1_r3/Snap-96822-Image Export-71.tif	0	TRUE	722.097
LRB407	d1	r3	../LRB407_d1_r3/Snap-96822-Image Export-71.tif	2	TRUE	821.397
LRB407	d1	r3	../LRB407_d1_r3/Snap-96822-Image Export-71.tif	3	TRUE	839.908
LRB407	d1	r3	../LRB407_d1_r3/Snap-96788-Image Export-37.tif	2	TRUE	800.498
LRB407	d1	r3	../LRB407_d1_r3/Snap-96788-Image Export-37.tif	4	TRUE	783.797
LRB407	d1	r3	../LRB407_d1_r3/Snap-96823-Image Export-72.tif	2	TRUE	811.706
LRB407	d1	r3	../LRB407_d1_r3/Snap-96823-Image Export-72.tif	3	TRUE	797.556
LRB407	d1	r3	../LRB407_d1_r3/Snap-96754-Image Export-03.tif	0	TRUE	773.44
LRB407	d1	r3	../LRB407_d1_r3/Snap-96754-Image Export-03.tif	1	TRUE	842.02
LRB407	d1	r3	../LRB407_d1_r3/Snap-96826-Image Export-75.tif	0	TRUE	828.314
LRB407	d1	r3	../LRB407_d1_r3/Snap-96826-Image Export-75.tif	1	TRUE	751.782
LRB407	d1	r3	../LRB407_d1_r3/Snap-96826-Image Export-75.tif	2	TRUE	802.643
LRB407	d1	r3	../LRB407_d1_r3/Snap-96821-Image Export-70.tif	0	TRUE	810.097
LRB407	d1	r3	../LRB407_d1_r3/Snap-96821-Image Export-70.tif	1	TRUE	764.821
LRB407	d1	r3	../LRB407_d1_r3/Snap-96821-Image Export-70.tif	2	TRUE	789.252
LRB407	d1	r3	../LRB407_d1_r3/Snap-96760-Image Export-09.tif	1	TRUE	766.43
LRB407	d1	r3	../LRB407_d1_r3/Snap-96760-Image Export-09.tif	2	TRUE	766.43
LRB407	d1	r3	../LRB407_d1_r3/Snap-96760-Image Export-09.tif	3	TRUE	751.116
LRB407	d1	r3	../LRB407_d1_r3/Snap-96753-Image Export-02.tif	1	TRUE	799.165
LRB407	d1	r3	../LRB407_d1_r3/Snap-96824-Image Export-73.tif	0	TRUE	770.184
LRB407	d1	r3	../LRB407_d1_r3/Snap-96824-Image Export-73.tif	4	TRUE	767.411
LRB407	d1	r3	../LRB407_d1_r3/Snap-96824-Image Export-73.tif	5	TRUE	757.497
LRB407	d1	r3	../LRB407_d1_r3/Snap-96824-Image Export-73.tif	6	TRUE	862.03
LRB407	d1	r3	../LRB407_d1_r3/Snap-96824-Image Export-73.tif	7	TRUE	799.073
LRB407	d1	r3	../LRB407_d1_r3/Snap-96824-Image Export-73.tif	8	TRUE	800.054
LRB407	d1	r3	../LRB407_d1_r3/Snap-96824-Image Export-73.tif	9	TRUE	781.17
LRB407	d1	r3	../LRB407_d1_r3/Snap-96798-Image Export-47.tif	0	TRUE	734.101
LRB407	d1	r3	../LRB407_d1_r3/Snap-96798-Image Export-47.tif	1	TRUE	767.725
LRB407	d1	r3	../LRB407_d1_r3/Snap-96798-Image Export-47.tif	2	TRUE	844.571
LRB407	d1	r3	../LRB407_d1_r3/Snap-96756-Image Export-05.tif	2	TRUE	844.257
LRB407	d1	r3	../LRB407_d1_r3/Snap-96756-Image Export-05.tif	3	TRUE	777.194
LRB407	d1	r3	../LRB407_d1_r3/Snap-96778-Image Export-27.tif	0	TRUE	831.532
LRB407	d1	r3	../LRB407_d1_r3/Snap-96778-Image Export-27.tif	1	TRUE	820.454
LRB407	d1	r3	../LRB407_d1_r3/Snap-96757-Image Export-06.tif	0	TRUE	799.87
LRB407	d1	r3	../LRB407_d1_r3/Snap-96757-Image Export-06.tif	3	TRUE	769.556
LRB407	d1	r3	../LRB407_d1_r3/Snap-96757-Image Export-06.tif	4	TRUE	814.073
LRB407	d1	r3	../LRB407_d1_r3/Snap-96839-Image Export-88.tif	1	TRUE	857.518
LRB407	d1	r3	../LRB407_d1_r3/Snap-96752-Image Export-01.tif	0	TRUE	773.126
LRB407	d1	r3	../LRB407_d1_r3/Snap-96755-Image Export-04.tif	0	TRUE	825.595
LRB407	d1	r3	../LRB407_d1_r3/Snap-96795-Image Export-44.tif	0	TRUE	827.962
LRB407	d1	r3	../LRB407_d1_r3/Snap-96795-Image Export-44.tif	1	TRUE	788.624
LRB407	d1	r3	../LRB407_d1_r3/Snap-96795-Image Export-44.tif	2	TRUE	778.802
LRB407	d1	r3	../LRB407_d1_r3/Snap-96773-Image Export-22.tif	2	TRUE	815.59
LRB407	d1	r3	../LRB407_d1_r3/Snap-96773-Image Export-22.tif	3	TRUE	770.628
LRB407	d1	r3	../LRB407_d1_r3/Snap-96792-Image Export-41.tif	2	TRUE	811.391
LRB407	d1	r3	../LRB407_d1_r3/Snap-96792-Image Export-41.tif	3	TRUE	665.835
LRB407	d1	r3	../LRB407_d1_r3/Snap-96792-Image Export-41.tif	4	TRUE	818.585
LRB407	d1	r3	../LRB407_d1_r3/Snap-96792-Image Export-41.tif	6	TRUE	758.44
LRB407	d1	r3	../LRB407_d1_r3/Snap-96804-Image Export-53.tif	0	TRUE	797.908
LRB407	d1	r3	../LRB407_d1_r3/Snap-96804-Image Export-53.tif	4	TRUE	755
LRB407	d1	r3	../LRB407_d1_r3/Snap-96804-Image Export-53.tif	7	TRUE	626.183
LRB407	d1	r3	../LRB407_d1_r3/Snap-96797-Image Export-46.tif	0	TRUE	784.87
LRB407	d1	r3	../LRB407_d1_r3/Snap-96797-Image Export-46.tif	1	TRUE	841.093
LRB407	d1	r3	../LRB407_d1_r3/Snap-96797-Image Export-46.tif	2	TRUE	807.507
LRB407	d1	r3	../LRB407_d1_r3/Snap-96776-Image Export-25.tif	0	TRUE	796.744
LRB407	d1	r3	../LRB407_d1_r3/Snap-96776-Image Export-25.tif	1	TRUE	809.246
LRB407	d1	r3	../LRB407_d1_r3/Snap-96776-Image Export-25.tif	2	TRUE	812.556
LRB407	d1	r3	../LRB407_d1_r3/Snap-96771-Image Export-20.tif	0	TRUE	820.991
LRB407	d1	r3	../LRB407_d1_r3/Snap-96771-Image Export-20.tif	1	TRUE	755
LRB407	d1	r3	../LRB407_d1_r3/Snap-96771-Image Export-20.tif	2	TRUE	749.729
LRB407	d1	r3	../LRB407_d1_r3/Snap-96819-Image Export-68.tif	1	TRUE	853.503
LRB407	d1	r3	../LRB407_d1_r3/Snap-96819-Image Export-68.tif	2	TRUE	763.396
LRB407	d1	r3	../LRB407_d1_r3/Snap-96819-Image Export-68.tif	3	TRUE	803.623
LRB407	d1	r3	../LRB407_d1_r3/Snap-96758-Image Export-07.tif	0	TRUE	769.962
LRB407	d1	r3	../LRB407_d1_r3/Snap-96796-Image Export-45.tif	2	TRUE	786.164
LRB407	d1	r3	../LRB407_d1_r3/Snap-96796-Image Export-45.tif	3	TRUE	746.382
LRB407	d1	r3	../LRB407_d1_r3/Snap-96796-Image Export-45.tif	4	TRUE	806.657
LRB407	d1	r3	../LRB407_d1_r3/Snap-96796-Image Export-45.tif	5	TRUE	779.913
LRB407	d1	r3	../LRB407_d1_r3/Snap-96791-Image Export-40.tif	2	TRUE	805.807
LRB407	d1	r3	../LRB407_d1_r3/Snap-96791-Image Export-40.tif	3	TRUE	823.764
LRB407	d1	r3	../LRB407_d1_r3/Snap-96791-Image Export-40.tif	4	TRUE	738.483
LRB407	d1	r3	../LRB407_d1_r3/Snap-96791-Image Export-40.tif	7	TRUE	724.816
LRB407	d1	r3	../LRB407_d1_r3/Snap-96791-Image Export-40.tif	9	TRUE	833.233
LRB407	d1	r3	../LRB407_d1_r3/Snap-96775-Image Export-24.tif	0	TRUE	806.213
LRB407	d1	r3	../LRB407_d1_r3/Snap-96775-Image Export-24.tif	1	TRUE	778.58
LRB407	d1	r3	../LRB407_d1_r3/Snap-96772-Image Export-21.tif	0	TRUE	819.918
LRB407	d1	r3	../LRB407_d1_r3/Snap-96772-Image Export-21.tif	1	TRUE	780.671
LRB407	d1	r3	../LRB407_d1_r3/Snap-96793-Image Export-42.tif	3	TRUE	765.672
LRB407	d1	r3	../LRB407_d1_r3/Snap-96793-Image Export-42.tif	4	TRUE	777.01
LRB407	d1	r3	../LRB407_d1_r3/Snap-96794-Image Export-43.tif	0	TRUE	834.029
LRB407	d1	r3	../LRB407_d1_r3/Snap-96794-Image Export-43.tif	1	TRUE	788.624
LRB407	d1	r3	../LRB407_d1_r3/Snap-96828-Image Export-77.tif	0	TRUE	798.575
LRB407	d1	r3	../LRB407_d1_r3/Snap-96828-Image Export-77.tif	1	TRUE	865.952
LRB407	d1	r3	../LRB407_d1_r3/Snap-96828-Image Export-77.tif	3	TRUE	799.295
LRB407	d1	r3	../LRB407_d1_r3/Snap-96828-Image Export-77.tif	4	TRUE	775.271
LRB407	d1	r3	../LRB407_d1_r3/Snap-96828-Image Export-77.tif	5	TRUE	801.256
LRB407	d1	r3	../LRB407_d1_r3/Snap-96807-Image Export-56.tif	0	TRUE	753.907
LRB407	d1	r3	../LRB407_d1_r3/Snap-96807-Image Export-56.tif	1	TRUE	795.168
LRB407	d1	r3	../LRB407_d1_r3/Snap-96807-Image Export-56.tif	5	TRUE	755.96
LRB407	d1	r3	../LRB407_d1_r3/Snap-96807-Image Export-56.tif	6	TRUE	799.739
LRB407	d1	r3	../LRB407_d1_r3/Snap-96783-Image Export-32.tif	0	TRUE	844.165
LRB407	d1	r3	../LRB407_d1_r3/Snap-96783-Image Export-32.tif	1	TRUE	833.585
LRB407	d1	r3	../LRB407_d1_r3/Snap-96783-Image Export-32.tif	2	TRUE	832.198
LRB407	d1	r3	../LRB407_d1_r3/Snap-96783-Image Export-32.tif	3	TRUE	834.88
LRB407	d1	r3	../LRB407_d1_r3/Snap-96783-Image Export-32.tif	4	TRUE	744.773
LRB407	d1	r3	../LRB407_d1_r3/Snap-96802-Image Export-51.tif	0	TRUE	797.594
LRB407	d1	r3	../LRB407_d1_r3/Snap-96802-Image Export-51.tif	1	TRUE	796.836
LRB407	d1	r3	../LRB407_d1_r3/Snap-96802-Image Export-51.tif	3	TRUE	789.474
LRB407	d1	r3	../LRB407_d1_r3/Snap-96786-Image Export-35.tif	0	TRUE	829.571
LRB407	d1	r3	../LRB407_d1_r3/Snap-96786-Image Export-35.tif	1	TRUE	793.174
LRB407	d1	r3	../LRB407_d1_r3/Snap-96786-Image Export-35.tif	2	TRUE	745.401
LRB407	d1	r3	../LRB407_d1_r3/Snap-96781-Image Export-30.tif	0	TRUE	813.222
LRB407	d1	r3	../LRB407_d1_r3/Snap-96781-Image Export-30.tif	1	TRUE	740.13
LRB407	d1	r3	../LRB407_d1_r3/Snap-96781-Image Export-30.tif	2	TRUE	639.758
LRB407	d1	r3	../LRB407_d1_r3/Snap-96787-Image Export-36.tif	3	TRUE	569.477
LRB407	d1	r3	../LRB407_d1_r3/Snap-96787-Image Export-36.tif	4	TRUE	770.406
LRB407	d1	r3	../LRB407_d1_r3/Snap-96787-Image Export-36.tif	5	TRUE	782.372
LRB407	d1	r3	../LRB407_d1_r3/Snap-96803-Image Export-52.tif	0	TRUE	647.97
LRB407	d1	r3	../LRB407_d1_r3/Snap-96803-Image Export-52.tif	2	TRUE	765.894
LRB407	d1	r3	../LRB407_d1_r3/Snap-96803-Image Export-52.tif	4	TRUE	789.382
LRB407	d1	r3	../LRB407_d1_r3/Snap-96770-Image Export-19.tif	0	TRUE	762.768
LRB407	d1	r3	../LRB407_d1_r3/Snap-96770-Image Export-19.tif	1	TRUE	808.894
LRB407	d1	r3	../LRB407_d1_r3/Snap-96770-Image Export-19.tif	2	TRUE	814.165
LRB407	d1	r3	../LRB407_d1_r3/Snap-96774-Image Export-23.tif	1	TRUE	773.754
LRB407	d1	r3	../LRB407_d1_r3/Snap-96774-Image Export-23.tif	2	TRUE	803.623
LRB407	d1	r3	../LRB407_d1_r3/Snap-96774-Image Export-23.tif	4	TRUE	824.3
LRB407	d1	r3	../LRB407_d1_r3/Snap-96774-Image Export-23.tif	5	TRUE	813.943
LRB407	d1	r3	../LRB407_d1_r3/Snap-96785-Image Export-34.tif	0	TRUE	807.691
LRB407	d1	r3	../LRB407_d1_r3/Snap-96785-Image Export-34.tif	1	TRUE	817.643
LRB407	d1	r3	../LRB407_d1_r3/Snap-96785-Image Export-34.tif	2	TRUE	854.928
LRB407	d1	r3	../LRB407_d1_r3/Snap-96785-Image Export-34.tif	4	TRUE	811.391
LRB407	d1	r3	../LRB407_d1_r3/Snap-96782-Image Export-31.tif	0	TRUE	835.324
LRB407	d1	r3	../LRB407_d1_r3/Snap-96782-Image Export-31.tif	1	TRUE	814.073
LRB407	d1	r3	../LRB407_d1_r3/Snap-96801-Image Export-50.tif	0	TRUE	760.623
LRB407	d1	r3	../LRB407_d1_r3/Snap-96801-Image Export-50.tif	2	TRUE	840.15
LRB407	d1	r3	../LRB407_d1_r3/Snap-96769-Image Export-18.tif	0	TRUE	804.826
LRB407	d1	r3	../LRB407_d1_r3/Snap-96769-Image Export-18.tif	1	TRUE	829.923
LRB407	d1	r3	../LRB407_d1_r3/Snap-96806-Image Export-55.tif	1	TRUE	789.696
LRB407	d1	r3	../LRB407_d1_r3/Snap-96806-Image Export-55.tif	2	TRUE	809.745
LRB407	d1	r3	../LRB407_d1_r3/Snap-96806-Image Export-55.tif	3	TRUE	850.102
LRB407	d1	r3	../LRB407_d1_r3/Snap-96830-Image Export-79.tif	1	TRUE	834.75
LRB407	d1	r3	../LRB407_d1_r3/Snap-96830-Image Export-79.tif	2	TRUE	822.691
LRB407	d1	r3	../LRB407_d1_r3/Snap-96830-Image Export-79.tif	3	TRUE	640.738
LRB407	d1	r3	../LRB407_d1_r3/Snap-96830-Image Export-79.tif	4	TRUE	803.531
LRB407	d1	r3	../LRB407_d1_r3/Snap-96830-Image Export-79.tif	5	TRUE	741.425
LRB407	d1	r3	../LRB407_d1_r3/Snap-96830-Image Export-79.tif	8	TRUE	783.575
LRB407	d1	r3	../LRB407_d1_r3/Snap-96830-Image Export-79.tif	9	TRUE	703.121
LRB407	d1	r3	../LRB407_d1_r3/Snap-96829-Image Export-78.tif	0	TRUE	815.368
LRB407	d1	r3	../LRB407_d1_r3/Snap-96829-Image Export-78.tif	1	TRUE	827.426
LRB407	d1	r3	../LRB407_d1_r3/Snap-96829-Image Export-78.tif	3	TRUE	818.049
LRB407	d1	r3	../LRB407_d1_r3/Snap-96800-Image Export-49.tif	1	TRUE	802.421
LRB407	d1	r3	../LRB407_d1_r3/Snap-96768-Image Export-17.tif	3	TRUE	830.996
LRB407	d1	r3	../LRB407_d1_r3/Snap-96780-Image Export-29.tif	0	TRUE	779.469
LRB407	d1	r3	../LRB407_d1_r3/Snap-96780-Image Export-29.tif	1	TRUE	819.121
LRB407	d1	r3	../LRB407_d1_r3/Snap-96780-Image Export-29.tif	2	TRUE	717.048
LRB407	d1	r3	../LRB407_d1_r3/Snap-96834-Image Export-83.tif	1	TRUE	745.309
LRB407	d1	r3	../LRB407_d1_r3/Snap-96834-Image Export-83.tif	2	TRUE	821.397
LRB407	d1	r3	../LRB407_d1_r3/Snap-96834-Image Export-83.tif	3	TRUE	775.363
LRB407	d1	r3	../LRB407_d1_r3/Snap-96834-Image Export-83.tif	4	TRUE	767.319
LRB407	d1	r3	../LRB407_d1_r3/Snap-96833-Image Export-82.tif	1	TRUE	764.155
LRB407	d1	r3	../LRB407_d1_r3/Snap-96833-Image Export-82.tif	2	TRUE	743.754
LRB407	d1	r3	../LRB407_d1_r3/Snap-96833-Image Export-82.tif	3	TRUE	804.474
LRB407	d1	r3	../LRB407_d1_r3/Snap-96818-Image Export-67.tif	0	TRUE	813.981
LRB407	d1	r3	../LRB407_d1_r3/Snap-96831-Image Export-80.tif	1	TRUE	723.207
LRB407	d1	r3	../LRB407_d1_r3/Snap-96831-Image Export-80.tif	2	TRUE	751.874
LRB407	d1	r3	../LRB407_d1_r3/Snap-96836-Image Export-85.tif	1	TRUE	812.242
LRB407	d1	r3	../LRB407_d1_r3/Snap-96836-Image Export-85.tif	3	TRUE	849.213
LRB407	d1	r3	../LRB407_d1_r3/Snap-96836-Image Export-85.tif	4	TRUE	828.092
LRB407	d1	r3	../LRB407_d1_r3/Snap-96837-Image Export-86.tif	0	TRUE	803.846
LRB407	d1	r3	../LRB407_d1_r3/Snap-96837-Image Export-86.tif	3	TRUE	771.256
LRB407	d1	r3	../LRB407_d1_r3/Snap-96837-Image Export-86.tif	5	TRUE	811.169
LRB407	d1	r3	../LRB407_d1_r3/Snap-96759-Image Export-08.tif	0	TRUE	816.034
LRB407	d1	r3	../LRB407_d1_r3/Snap-96759-Image Export-08.tif	1	TRUE	822.469
LRB407	d1	r3	../LRB407_d1_r3/Snap-96759-Image Export-08.tif	3	TRUE	798.759
LRB407	d1	r3	../LRB407_d1_r3/Snap-96759-Image Export-08.tif	4	TRUE	849.565
LRB407	d1	r3	../LRB407_d1_r3/Snap-96832-Image Export-81.tif	0	TRUE	787.107
LRB407	d1	r3	../LRB407_d1_r3/Snap-96832-Image Export-81.tif	2	TRUE	867.837
LRB407	d1	r3	../LRB407_d1_r3/Snap-96832-Image Export-81.tif	3	TRUE	794.875
LRB407	d1	r3	../LRB407_d1_r3/Snap-96835-Image Export-84.tif	0	TRUE	776.121
LRB407	d1	r3	../LRB407_d1_r3/Snap-96835-Image Export-84.tif	2	TRUE	793.894
LRB407	d1	r3	../LRB407_d1_r3/Snap-96835-Image Export-84.tif	6	TRUE	756.387
LRB407	d1	r3	../LRB407_d1_r3/Snap-96835-Image Export-84.tif	8	TRUE	842.518
LRB407	d1	r3	../LRB407_d1_r3/Snap-96817-Image Export-66.tif	0	TRUE	740.222
LRB407	d1	r3	../LRB407_d1_r3/Snap-96817-Image Export-66.tif	2	TRUE	775.455
LRB407	d1	r3	../LRB407_d1_r3/Snap-96817-Image Export-66.tif	3	TRUE	796.706
LRB407	d1	r3	../LRB407_d1_r3/Snap-96799-Image Export-48.tif	0	TRUE	756.073
LRB407	d1	r3	../LRB407_d1_r3/Snap-96799-Image Export-48.tif	1	TRUE	800.942
LRB407	d1	r3	../LRB407_d1_r3/Snap-96815-Image Export-64.tif	0	TRUE	768.353
LRB407	d1	r3	../LRB407_d1_r3/Snap-96815-Image Export-64.tif	1	TRUE	755.758
LRB407	d1	r3	../LRB407_d1_r3/Snap-96815-Image Export-64.tif	2	TRUE	810.411
LRB407	d1	r3	../LRB407_d1_r3/Snap-96812-Image Export-61.tif	1	TRUE	677.618
LRB407	d1	r3	../LRB407_d1_r3/Snap-96812-Image Export-61.tif	3	TRUE	766.208
LRB407	d1	r3	../LRB407_d1_r3/Snap-96812-Image Export-61.tif	4	TRUE	763.841
LRB407	d1	r3	../LRB407_d1_r3/Snap-96812-Image Export-61.tif	5	TRUE	816.034
LRB407	d1	r3	../LRB407_d1_r3/Snap-96813-Image Export-62.tif	1	TRUE	803.271
LRB407	d1	r3	../LRB407_d1_r3/Snap-96813-Image Export-62.tif	2	TRUE	818.309
LRB407	d1	r3	../LRB407_d1_r3/Snap-96838-Image Export-87.tif	4	TRUE	762.194
LRB407	d1	r3	../LRB407_d1_r3/Snap-96838-Image Export-87.tif	5	TRUE	777.194
LRB407	d1	r3	../LRB407_d1_r3/Snap-96816-Image Export-65.tif	1	TRUE	787.773
LRB407	d1	r3	../LRB407_d1_r3/Snap-96816-Image Export-65.tif	2	TRUE	762.362
LRB407	d1	r3	../LRB407_d1_r3/Snap-96816-Image Export-65.tif	4	TRUE	841.889
LRB407	d1	r3	../LRB407_d1_r3/Snap-96811-Image Export-60.tif	1	TRUE	796.614
LRB407	d1	r3	../LRB407_d1_r3/Snap-96811-Image Export-60.tif	2	TRUE	734.729
LRB407	d1	r3	../LRB407_d1_r3/Snap-96764-Image Export-13.tif	0	TRUE	830.459
LRB407	d1	r3	../LRB407_d1_r3/Snap-96763-Image Export-12.tif	0	TRUE	818.807
LRB407	d1	r3	../LRB407_d1_r3/Snap-96820-Image Export-69.tif	1	TRUE	756.831
LRB407	d1	r3	../LRB407_d1_r3/Snap-96820-Image Export-69.tif	3	TRUE	760.401
LRB407	d1	r3	../LRB407_d1_r3/Snap-96761-Image Export-10.tif	0	TRUE	796.966
LRB407	d1	r3	../LRB407_d1_r3/Snap-96761-Image Export-10.tif	1	TRUE	763.82
LRB407	d1	r3	../LRB407_d1_r3/Snap-96766-Image Export-15.tif	0	TRUE	790.27
LRB407	d1	r3	../LRB407_d1_r3/Snap-96814-Image Export-63.tif	0	TRUE	833.049
LRB407	d1	r3	../LRB407_d1_r3/Snap-96767-Image Export-16.tif	0	TRUE	790.232
LRB407	d1	r3	../LRB407_d1_r3/Snap-96767-Image Export-16.tif	1	TRUE	826.131
LRB407	d1	r3	../LRB407_d1_r3/Snap-96790-Image Export-39.tif	0	TRUE	686.55
LRB407	d1	r3	../LRB407_d1_r3/Snap-96790-Image Export-39.tif	1	TRUE	837.691
LRB407	d1	r3	../LRB407_d1_r3/Snap-96790-Image Export-39.tif	2	TRUE	780.357
LRB407	d1	r3	../LRB407_d1_r3/Snap-96790-Image Export-39.tif	3	TRUE	768.889
LRB407	d1	r3	../LRB407_d1_r3/Snap-96790-Image Export-39.tif	4	TRUE	833.363
LRB407	d1	r3	../LRB407_d1_r3/Snap-96790-Image Export-39.tif	5	TRUE	795.855
LRB407	d1	r3	../LRB407_d1_r3/Snap-96790-Image Export-39.tif	6	TRUE	783.537
LRB407	d1	r3	../LRB407_d1_r3/Snap-96790-Image Export-39.tif	7	TRUE	806.971
LRB407	d1	r3	../LRB407_d1_r3/Snap-96790-Image Export-39.tif	8	TRUE	749.285
LRB407	d1	r3	../LRB407_d1_r3/Snap-96762-Image Export-11.tif	0	TRUE	772.145
LRB407	d1	r3	../LRB407_d1_r3/Snap-96765-Image Export-14.tif	0	TRUE	822.599
LRB407	d1	r3	../LRB407_d1_r3/Snap-96789-Image Export-38.tif	0	TRUE	792.952
LRB407	d1	r3	../LRB407_d1_r3/Snap-96789-Image Export-38.tif	1	TRUE	787.589
LRB407	d1	r3	../LRB407_d1_r3/Snap-96789-Image Export-38.tif	3	TRUE	752.725
LRB407	d1	r3	../LRB407_d1_r3/Snap-96789-Image Export-38.tif	5	TRUE	735.488
LRB407	d1	r4	../LRB407_d1_r4/Snap-97764-Image Export-43.tif	0	TRUE	722.097
LRB407	d1	r4	../LRB407_d1_r4/Snap-97764-Image Export-43.tif	1	TRUE	783.575
LRB407	d1	r4	../LRB407_d1_r4/Snap-97764-Image Export-43.tif	2	TRUE	816.44
LRB407	d1	r4	../LRB407_d1_r4/Snap-97764-Image Export-43.tif	3	TRUE	820.768
LRB407	d1	r4	../LRB407_d1_r4/Snap-97764-Image Export-43.tif	4	TRUE	867.967
LRB407	d1	r4	../LRB407_d1_r4/Snap-97739-Image Export-18.tif	1	TRUE	831.402
LRB407	d1	r4	../LRB407_d1_r4/Snap-97739-Image Export-18.tif	2	TRUE	758.218
LRB407	d1	r4	../LRB407_d1_r4/Snap-97739-Image Export-18.tif	3	TRUE	810.319
LRB407	d1	r4	../LRB407_d1_r4/Snap-97765-Image Export-44.tif	1	TRUE	812.778
LRB407	d1	r4	../LRB407_d1_r4/Snap-97765-Image Export-44.tif	3	TRUE	817.735
LRB407	d1	r4	../LRB407_d1_r4/Snap-97762-Image Export-41.tif	0	TRUE	806.213
LRB407	d1	r4	../LRB407_d1_r4/Snap-97762-Image Export-41.tif	1	TRUE	779.783
LRB407	d1	r4	../LRB407_d1_r4/Snap-97762-Image Export-41.tif	2	TRUE	814.295
LRB407	d1	r4	../LRB407_d1_r4/Snap-97789-Image Export-68.tif	0	TRUE	784.333
LRB407	d1	r4	../LRB407_d1_r4/Snap-97789-Image Export-68.tif	1	TRUE	789.068
LRB407	d1	r4	../LRB407_d1_r4/Snap-97789-Image Export-68.tif	2	TRUE	802.957
LRB407	d1	r4	../LRB407_d1_r4/Snap-97767-Image Export-46.tif	1	TRUE	778.71
LRB407	d1	r4	../LRB407_d1_r4/Snap-97759-Image Export-38.tif	0	TRUE	772.459
LRB407	d1	r4	../LRB407_d1_r4/Snap-97759-Image Export-38.tif	1	TRUE	769.962
LRB407	d1	r4	../LRB407_d1_r4/Snap-97766-Image Export-45.tif	0	TRUE	761.657
LRB407	d1	r4	../LRB407_d1_r4/Snap-97761-Image Export-40.tif	0	TRUE	836.266
LRB407	d1	r4	../LRB407_d1_r4/Snap-97761-Image Export-40.tif	1	TRUE	757.015
LRB407	d1	r4	../LRB407_d1_r4/Snap-97763-Image Export-42.tif	0	TRUE	766.928
LRB407	d1	r4	../LRB407_d1_r4/Snap-97763-Image Export-42.tif	1	TRUE	828.498
LRB407	d1	r4	../LRB407_d1_r4/Snap-97763-Image Export-42.tif	2	TRUE	812.87
LRB407	d1	r4	../LRB407_d1_r4/Snap-97763-Image Export-42.tif	3	TRUE	823.097
LRB407	d1	r4	../LRB407_d1_r4/Snap-97763-Image Export-42.tif	4	TRUE	790.455
LRB407	d1	r4	../LRB407_d1_r4/Snap-97777-Image Export-56.tif	0	TRUE	780.763
LRB407	d1	r4	../LRB407_d1_r4/Snap-97768-Image Export-47.tif	0	TRUE	792.638
LRB407	d1	r4	../LRB407_d1_r4/Snap-97768-Image Export-47.tif	2	TRUE	803.585
LRB407	d1	r4	../LRB407_d1_r4/Snap-97768-Image Export-47.tif	3	TRUE	784.111
LRB407	d1	r4	../LRB407_d1_r4/Snap-97775-Image Export-54.tif	0	TRUE	765.802
LRB407	d1	r4	../LRB407_d1_r4/Snap-97772-Image Export-51.tif	0	TRUE	816.976
LRB407	d1	r4	../LRB407_d1_r4/Snap-97799-Image Export-78.tif	0	TRUE	779.469
LRB407	d1	r4	../LRB407_d1_r4/Snap-97799-Image Export-78.tif	1	TRUE	809.116
LRB407	d1	r4	../LRB407_d1_r4/Snap-97799-Image Export-78.tif	2	TRUE	810.189
LRB407	d1	r4	../LRB407_d1_r4/Snap-97750-Image Export-29.tif	0	TRUE	773.662
LRB407	d1	r4	../LRB407_d1_r4/Snap-97750-Image Export-29.tif	1	TRUE	842.87
LRB407	d1	r4	../LRB407_d1_r4/Snap-97750-Image Export-29.tif	2	TRUE	852.653
LRB407	d1	r4	../LRB407_d1_r4/Snap-97750-Image Export-29.tif	3	TRUE	807.377
LRB407	d1	r4	../LRB407_d1_r4/Snap-97773-Image Export-52.tif	0	TRUE	749.913
LRB407	d1	r4	../LRB407_d1_r4/Snap-97776-Image Export-55.tif	0	TRUE	813.759
LRB407	d1	r4	../LRB407_d1_r4/Snap-97776-Image Export-55.tif	1	TRUE	801.884
LRB407	d1	r4	../LRB407_d1_r4/Snap-97771-Image Export-50.tif	1	TRUE	758.218
LRB407	d1	r4	../LRB407_d1_r4/Snap-97729-Image Export-08.tif	0	TRUE	825.503
LRB407	d1	r4	../LRB407_d1_r4/Snap-97729-Image Export-08.tif	1	TRUE	748.527
LRB407	d1	r4	../LRB407_d1_r4/Snap-97774-Image Export-53.tif	0	TRUE	710.797
LRB407	d1	r4	../LRB407_d1_r4/Snap-97774-Image Export-53.tif	1	TRUE	796.706
LRB407	d1	r4	../LRB407_d1_r4/Snap-97730-Image Export-09.tif	0	TRUE	820.86
LRB407	d1	r4	../LRB407_d1_r4/Snap-97784-Image Export-63.tif	0	TRUE	821.175
LRB407	d1	r4	../LRB407_d1_r4/Snap-97737-Image Export-16.tif	0	TRUE	778.802
LRB407	d1	r4	../LRB407_d1_r4/Snap-97737-Image Export-16.tif	1	TRUE	752.411
LRB407	d1	r4	../LRB407_d1_r4/Snap-97780-Image Export-59.tif	0	TRUE	821.489
LRB407	d1	r4	../LRB407_d1_r4/Snap-97728-Image Export-07.tif	0	TRUE	746.918
LRB407	d1	r4	../LRB407_d1_r4/Snap-97728-Image Export-07.tif	1	TRUE	665.207
LRB407	d1	r4	../LRB407_d1_r4/Snap-97760-Image Export-39.tif	0	TRUE	779.469
LRB407	d1	r4	../LRB407_d1_r4/Snap-97733-Image Export-12.tif	0	TRUE	781.392
LRB407	d1	r4	../LRB407_d1_r4/Snap-97754-Image Export-33.tif	1	TRUE	846.088
LRB407	d1	r4	../LRB407_d1_r4/Snap-97754-Image Export-33.tif	2	TRUE	820.416
LRB407	d1	r4	../LRB407_d1_r4/Snap-97736-Image Export-15.tif	0	TRUE	748.527
LRB407	d1	r4	../LRB407_d1_r4/Snap-97731-Image Export-10.tif	0	TRUE	824.744
LRB407	d1	r4	../LRB407_d1_r4/Snap-97731-Image Export-10.tif	1	TRUE	832.512
LRB407	d1	r4	../LRB407_d1_r4/Snap-97756-Image Export-35.tif	1	TRUE	846.624
LRB407	d1	r4	../LRB407_d1_r4/Snap-97756-Image Export-35.tif	3	TRUE	745.401
LRB407	d1	r4	../LRB407_d1_r4/Snap-97756-Image Export-35.tif	4	TRUE	828.72
LRB407	d1	r4	../LRB407_d1_r4/Snap-97782-Image Export-61.tif	0	TRUE	777.508
LRB407	d1	r4	../LRB407_d1_r4/Snap-97751-Image Export-30.tif	3	TRUE	817.735
LRB407	d1	r4	../LRB407_d1_r4/Snap-97751-Image Export-30.tif	4	TRUE	799.295
LRB407	d1	r4	../LRB407_d1_r4/Snap-97751-Image Export-30.tif	8	TRUE	713.072
LRB407	d1	r4	../LRB407_d1_r4/Snap-97785-Image Export-64.tif	0	TRUE	782.188
LRB407	d1	r4	../LRB407_d1_r4/Snap-97785-Image Export-64.tif	1	TRUE	781.966
LRB407	d1	r4	../LRB407_d1_r4/Snap-97769-Image Export-48.tif	0	TRUE	817.16
LRB407	d1	r4	../LRB407_d1_r4/Snap-97769-Image Export-48.tif	1	TRUE	878.194
LRB407	d1	r4	../LRB407_d1_r4/Snap-97798-Image Export-77.tif	0	TRUE	774.512
LRB407	d1	r4	../LRB407_d1_r4/Snap-97798-Image Export-77.tif	1	TRUE	849.565
LRB407	d1	r4	../LRB407_d1_r4/Snap-97798-Image Export-77.tif	2	TRUE	806.397
LRB407	d1	r4	../LRB407_d1_r4/Snap-97798-Image Export-77.tif	4	TRUE	757.942
LRB407	d1	r4	../LRB407_d1_r4/Snap-97787-Image Export-66.tif	0	TRUE	766.836
LRB407	d1	r4	../LRB407_d1_r4/Snap-97787-Image Export-66.tif	1	TRUE	783.353
LRB407	d1	r4	../LRB407_d1_r4/Snap-97753-Image Export-32.tif	1	TRUE	781.966
LRB407	d1	r4	../LRB407_d1_r4/Snap-97753-Image Export-32.tif	2	TRUE	737.633
LRB407	d1	r4	../LRB407_d1_r4/Snap-97770-Image Export-49.tif	0	TRUE	786.386
LRB407	d1	r4	../LRB407_d1_r4/Snap-97770-Image Export-49.tif	1	TRUE	778.933
LRB407	d1	r4	../LRB407_d1_r4/Snap-97734-Image Export-13.tif	0	TRUE	831.126
LRB407	d1	r4	../LRB407_d1_r4/Snap-97734-Image Export-13.tif	1	TRUE	865.155
LRB407	d1	r4	../LRB407_d1_r4/Snap-97781-Image Export-60.tif	0	TRUE	822.285
LRB407	d1	r4	../LRB407_d1_r4/Snap-97755-Image Export-34.tif	1	TRUE	802.53
LRB407	d1	r4	../LRB407_d1_r4/Snap-97755-Image Export-34.tif	2	TRUE	773.754
LRB407	d1	r4	../LRB407_d1_r4/Snap-97755-Image Export-34.tif	3	TRUE	770.85
LRB407	d1	r4	../LRB407_d1_r4/Snap-97786-Image Export-65.tif	1	TRUE	868.189
LRB407	d1	r4	../LRB407_d1_r4/Snap-97786-Image Export-65.tif	2	TRUE	764.285
LRB407	d1	r4	../LRB407_d1_r4/Snap-97752-Image Export-31.tif	1	TRUE	732.048
LRB407	d1	r4	../LRB407_d1_r4/Snap-97752-Image Export-31.tif	2	TRUE	705.97
LRB407	d1	r4	../LRB407_d1_r4/Snap-97752-Image Export-31.tif	3	TRUE	841.889
LRB407	d1	r4	../LRB407_d1_r4/Snap-97748-Image Export-27.tif	1	TRUE	783.353
LRB407	d1	r4	../LRB407_d1_r4/Snap-97748-Image Export-27.tif	2	TRUE	780.227
LRB407	d1	r4	../LRB407_d1_r4/Snap-97748-Image Export-27.tif	3	TRUE	807.415
LRB407	d1	r4	../LRB407_d1_r4/Snap-97748-Image Export-27.tif	4	TRUE	799.203
LRB407	d1	r4	../LRB407_d1_r4/Snap-97757-Image Export-36.tif	0	TRUE	789.198
LRB407	d1	r4	../LRB407_d1_r4/Snap-97757-Image Export-36.tif	1	TRUE	808.672
LRB407	d1	r4	../LRB407_d1_r4/Snap-97757-Image Export-36.tif	2	TRUE	866.933
LRB407	d1	r4	../LRB407_d1_r4/Snap-97757-Image Export-36.tif	3	TRUE	849.657
LRB407	d1	r4	../LRB407_d1_r4/Snap-97757-Image Export-36.tif	5	TRUE	754.594
LRB407	d1	r4	../LRB407_d1_r4/Snap-97757-Image Export-36.tif	6	TRUE	831.624
LRB407	d1	r4	../LRB407_d1_r4/Snap-97783-Image Export-62.tif	0	TRUE	834.566
LRB407	d1	r4	../LRB407_d1_r4/Snap-97797-Image Export-76.tif	1	TRUE	835.952
LRB407	d1	r4	../LRB407_d1_r4/Snap-97797-Image Export-76.tif	2	TRUE	775.087
LRB407	d1	r4	../LRB407_d1_r4/Snap-97797-Image Export-76.tif	3	TRUE	769.333
LRB407	d1	r4	../LRB407_d1_r4/Snap-97743-Image Export-22.tif	0	TRUE	778.841
LRB407	d1	r4	../LRB407_d1_r4/Snap-97743-Image Export-22.tif	1	TRUE	833.233
LRB407	d1	r4	../LRB407_d1_r4/Snap-97743-Image Export-22.tif	2	TRUE	826.445
LRB407	d1	r4	../LRB407_d1_r4/Snap-97724-Image Export-03.tif	0	TRUE	769.111
LRB407	d1	r4	../LRB407_d1_r4/Snap-97746-Image Export-25.tif	0	TRUE	771.479
LRB407	d1	r4	../LRB407_d1_r4/Snap-97746-Image Export-25.tif	1	TRUE	819.566
LRB407	d1	r4	../LRB407_d1_r4/Snap-97792-Image Export-71.tif	0	TRUE	806.933
LRB407	d1	r4	../LRB407_d1_r4/Snap-97792-Image Export-71.tif	1	TRUE	727.72
LRB407	d1	r4	../LRB407_d1_r4/Snap-97792-Image Export-71.tif	2	TRUE	771.164
LRB407	d1	r4	../LRB407_d1_r4/Snap-97741-Image Export-20.tif	2	TRUE	832.827
LRB407	d1	r4	../LRB407_d1_r4/Snap-97741-Image Export-20.tif	4	TRUE	769.333
LRB407	d1	r4	../LRB407_d1_r4/Snap-97795-Image Export-74.tif	0	TRUE	774.198
LRB407	d1	r4	../LRB407_d1_r4/Snap-97795-Image Export-74.tif	1	TRUE	777.194
LRB407	d1	r4	../LRB407_d1_r4/Snap-97795-Image Export-74.tif	2	TRUE	793.266
LRB407	d1	r4	../LRB407_d1_r4/Snap-97795-Image Export-74.tif	5	TRUE	716.826
LRB407	d1	r4	../LRB407_d1_r4/Snap-97779-Image Export-58.tif	1	TRUE	770.406
LRB407	d1	r4	../LRB407_d1_r4/Snap-97779-Image Export-58.tif	3	TRUE	812.778
LRB407	d1	r4	../LRB407_d1_r4/Snap-97788-Image Export-67.tif	1	TRUE	804.03
LRB407	d1	r4	../LRB407_d1_r4/Snap-97788-Image Export-67.tif	2	TRUE	804.382
LRB407	d1	r4	../LRB407_d1_r4/Snap-97788-Image Export-67.tif	3	TRUE	793.71
LRB407	d1	r4	../LRB407_d1_r4/Snap-97747-Image Export-26.tif	0	TRUE	814.961
LRB407	d1	r4	../LRB407_d1_r4/Snap-97793-Image Export-72.tif	0	TRUE	778.802
LRB407	d1	r4	../LRB407_d1_r4/Snap-97793-Image Export-72.tif	2	TRUE	747.638
LRB407	d1	r4	../LRB407_d1_r4/Snap-97791-Image Export-70.tif	0	TRUE	754.648
LRB407	d1	r4	../LRB407_d1_r4/Snap-97791-Image Export-70.tif	1	TRUE	813.092
LRB407	d1	r4	../LRB407_d1_r4/Snap-97745-Image Export-24.tif	0	TRUE	867.745
LRB407	d1	r4	../LRB407_d1_r4/Snap-97745-Image Export-24.tif	1	TRUE	847.696
LRB407	d1	r4	../LRB407_d1_r4/Snap-97796-Image Export-75.tif	0	TRUE	774.198
LRB407	d1	r4	../LRB407_d1_r4/Snap-97796-Image Export-75.tif	1	TRUE	777.194
LRB407	d1	r4	../LRB407_d1_r4/Snap-97796-Image Export-75.tif	2	TRUE	793.266
LRB407	d1	r4	../LRB407_d1_r4/Snap-97796-Image Export-75.tif	5	TRUE	716.826
LRB407	d1	r4	../LRB407_d1_r4/Snap-97742-Image Export-21.tif	2	TRUE	761.343
LRB407	d1	r4	../LRB407_d1_r4/Snap-97742-Image Export-21.tif	3	TRUE	740.352
LRB407	d1	r4	../LRB407_d1_r4/Snap-97758-Image Export-37.tif	0	TRUE	792.285
LRB407	d1	r4	../LRB407_d1_r4/Snap-97758-Image Export-37.tif	1	TRUE	777.324
LRB407	d1	r4	../LRB407_d1_r4/Snap-97758-Image Export-37.tif	2	TRUE	792.193
LRB407	d1	r4	../LRB407_d1_r4/Snap-97738-Image Export-17.tif	0	TRUE	803.715
LRB407	d1	r4	../LRB407_d1_r4/Snap-97738-Image Export-17.tif	1	TRUE	814.923
LRB407	d1	r4	../LRB407_d1_r4/Snap-97725-Image Export-04.tif	0	TRUE	781.43
LRB407	d1	r4	../LRB407_d1_r4/Snap-97722-Image Export-01.tif	0	TRUE	831.624
LRB407	d1	r4	../LRB407_d1_r4/Snap-97722-Image Export-01.tif	1	TRUE	812.242
LRB407	d1	r4	../LRB407_d1_r4/Snap-97794-Image Export-73.tif	2	TRUE	739.594
LRB407	d1	r4	../LRB407_d1_r4/Snap-97794-Image Export-73.tif	3	TRUE	829.923
LRB407	d1	r4	../LRB407_d1_r4/Snap-97727-Image Export-06.tif	0	TRUE	814.073
LRB407	d1	r4	../LRB407_d1_r4/Snap-97726-Image Export-05.tif	0	TRUE	808.58
LRB407	d1	r4	../LRB407_d1_r4/Snap-97723-Image Export-02.tif	0	TRUE	791.527
LRB407	d1	r4	../LRB407_d1_r4/Snap-97744-Image Export-23.tif	0	TRUE	814.831
LRB407	d1	r4	../LRB407_d1_r4/Snap-97744-Image Export-23.tif	1	TRUE	777.952
[truncated: 6,806 more rows]
