# Supplementary material for: Using population selection and sequencing to characterize natural variation of starvation resistance in Caenorhabditis elegans
Source: eLife. 2022 Jun 21;11:e80204. doi: 10.7554/eLife.80204 (PMC9262388; doi:10.7554/eLife.80204)
Supplement: Figure 3—source data 1. [file elife-80204-fig3-data1.xlsx]

## Sheet: README
Source data is available on each sheet for manual phenotypic assays for survival, recovery, and early fecundity. These correspond to the figure panels below:
Fig 3I
Fig 3J
Fig 3K
Fig 3L

## Sheet: Fig_3I
strain	background	allele	replicate	day	Tp	Ta	prop_alive
N2	N2	WT	rep1	3	95	79	0.831579
N2	N2	WT	rep1	5	100	89	0.89
N2	N2	WT	rep1	7	94	82	0.87234
N2	N2	WT	rep1	9	61	48	0.786885
N2	N2	WT	rep1	11	107	63	0.588785
N2	N2	WT	rep1	13	102	36	0.352941
N2	N2	WT	rep1	15	97	10	0.103093
N2	N2	WT	rep1	17	112	6	0.0535714
N2	N2	WT	rep1	19	97	1	0.0103093
N2	N2	WT	rep1	21	114	0	0
MY2147	MY	WT	rep1	3	83	74	0.891566
MY2147	MY	WT	rep1	5	80	75	0.9375
MY2147	MY	WT	rep1	7	81	67	0.82716
MY2147	MY	WT	rep1	9	75	46	0.613333
MY2147	MY	WT	rep1	11	100	29	0.29
MY2147	MY	WT	rep1	13	62	6	0.0967742
MY2147	MY	WT	rep1	15	79	0	0
irld39_N2	N2	irld39	rep1	3	71	73	1.02817
irld39_N2	N2	irld39	rep1	5	98	98	1
irld39_N2	N2	irld39	rep1	7	75	67	0.893333
irld39_N2	N2	irld39	rep1	9	72	45	0.625
irld39_N2	N2	irld39	rep1	11	104	42	0.403846
irld39_N2	N2	irld39	rep1	13	95	15	0.157895
irld39_N2	N2	irld39	rep1	15	101	4	0.039604
irld39_N2	N2	irld39	rep1	17	89	3	0.0337079
irld39_N2	N2	irld39	rep1	19	108	1	0.00925926
irld39_N2	N2	irld39	rep1	21	105	0	0
irld39_MY	MY	irld39	rep1	3	70	64	0.914286
irld39_MY	MY	irld39	rep1	5	81	71	0.876543
irld39_MY	MY	irld39	rep1	7	90	82	0.911111
irld39_MY	MY	irld39	rep1	9	87	50	0.574713
irld39_MY	MY	irld39	rep1	11	69	36	0.521739
irld39_MY	MY	irld39	rep1	13	104	21	0.201923
irld39_MY	MY	irld39	rep1	15	91	4	0.043956
irld39_MY	MY	irld39	rep1	17	104	1	0.00961539
irld39_MY	MY	irld39	rep1	19	94	0	0
irld52_N2	N2	irld52	rep1	3	82	77	0.939024
irld52_N2	N2	irld52	rep1	5	76	73	0.960526
irld52_N2	N2	irld52	rep1	7	81	76	0.938272
irld52_N2	N2	irld52	rep1	9	104	76	0.730769
irld52_N2	N2	irld52	rep1	11	98	48	0.489796
irld52_N2	N2	irld52	rep1	13	103	9	0.0873786
irld52_N2	N2	irld52	rep1	15	104	11	0.105769
irld52_N2	N2	irld52	rep1	17	108	1	0.00925926
irld52_N2	N2	irld52	rep1	19	123	0	0
irld52_MY	MY	irld52	rep1	3	97	78	0.804124
irld52_MY	MY	irld52	rep1	5	89	76	0.853933
irld52_MY	MY	irld52	rep1	7	96	85	0.885417
irld52_MY	MY	irld52	rep1	9	83	47	0.566265
irld52_MY	MY	irld52	rep1	11	75	29	0.386667
irld52_MY	MY	irld52	rep1	13	71	25	0.352113
irld52_MY	MY	irld52	rep1	15	90	12	0.133333
irld52_MY	MY	irld52	rep1	17	95	5	0.0526316
irld52_MY	MY	irld52	rep1	19	110	1	0.00909091
irld52_MY	MY	irld52	rep1	21	75	0	0
N2	N2	WT	rep2	1	89	85	0.955056
N2	N2	WT	rep2	3	61	58	0.95082
N2	N2	WT	rep2	5	68	66	0.970588
N2	N2	WT	rep2	7	79	78	0.987342
N2	N2	WT	rep2	9	123	85	0.691057
N2	N2	WT	rep2	11	111	54	0.486486
N2	N2	WT	rep2	13	94	31	0.329787
N2	N2	WT	rep2	15	135	27	0.2
N2	N2	WT	rep2	19	118	4	0.0338983
MY2147	MY	WT	rep2	1	61	54	0.885246
MY2147	MY	WT	rep2	3	61	53	0.868852
MY2147	MY	WT	rep2	5	79	77	0.974684
MY2147	MY	WT	rep2	7	58	52	0.896552
MY2147	MY	WT	rep2	9	57	26	0.45614
MY2147	MY	WT	rep2	11	94	15	0.159574
MY2147	MY	WT	rep2	13	80	21	0.2625
MY2147	MY	WT	rep2	15	81	18	0.222222
MY2147	MY	WT	rep2	19	85	1	0.0117647
irld39_N2	N2	irld39	rep2	1	66	65	0.984848
irld39_N2	N2	irld39	rep2	3	61	55	0.901639
irld39_N2	N2	irld39	rep2	5	55	48	0.872727
irld39_N2	N2	irld39	rep2	7	73	57	0.780822
irld39_N2	N2	irld39	rep2	9	69	31	0.449275
irld39_N2	N2	irld39	rep2	11	103	23	0.223301
irld39_N2	N2	irld39	rep2	13	106	9	0.0849057
irld39_N2	N2	irld39	rep2	15	98	5	0.0510204
irld39_N2	N2	irld39	rep2	19	93	0	0
irld39_MY	MY	irld39	rep2	1	94	87	0.925532
irld39_MY	MY	irld39	rep2	3	78	73	0.935897
irld39_MY	MY	irld39	rep2	5	70	68	0.971429
irld39_MY	MY	irld39	rep2	7	69	62	0.898551
irld39_MY	MY	irld39	rep2	9	72	57	0.791667
irld39_MY	MY	irld39	rep2	11	71	30	0.422535
irld39_MY	MY	irld39	rep2	13	97	50	0.515464
irld39_MY	MY	irld39	rep2	15	101	44	0.435644
irld39_MY	MY	irld39	rep2	19	78	4	0.0512821
irld52_N2	N2	irld52	rep2	1	103	94	0.912621
irld52_N2	N2	irld52	rep2	3	95	82	0.863158
irld52_N2	N2	irld52	rep2	5	99	93	0.939394
irld52_N2	N2	irld52	rep2	7	95	85	0.894737
irld52_N2	N2	irld52	rep2	9	87	54	0.62069
irld52_N2	N2	irld52	rep2	11	90	29	0.322222
irld52_N2	N2	irld52	rep2	13	90	12	0.133333
irld52_N2	N2	irld52	rep2	15	99	2	0.020202
irld52_N2	N2	irld52	rep2	19	83	1	0.0120482
irld52_MY	MY	irld52	rep2	1	99	91	0.919192
irld52_MY	MY	irld52	rep2	3	104	88	0.846154
irld52_MY	MY	irld52	rep2	5	108	80	0.740741
irld52_MY	MY	irld52	rep2	7	94	78	0.829787
irld52_MY	MY	irld52	rep2	9	105	81	0.771429
irld52_MY	MY	irld52	rep2	11	99	31	0.313131
irld52_MY	MY	irld52	rep2	13	94	49	0.521277
irld52_MY	MY	irld52	rep2	15	96	22	0.229167
N2	N2	WT	rep3	1	115	111	0.965217
N2	N2	WT	rep3	3	132	127	0.962121
N2	N2	WT	rep3	5	130	109	0.838462
N2	N2	WT	rep3	7	109	102	0.93578
N2	N2	WT	rep3	9	97	70	0.721649
N2	N2	WT	rep3	11	104	16	0.153846
N2	N2	WT	rep3	15	128	0	0
MY2147	MY	WT	rep3	1	72	71	0.986111
MY2147	MY	WT	rep3	3	86	80	0.930233
MY2147	MY	WT	rep3	5	98	72	0.734694
MY2147	MY	WT	rep3	7	92	68	0.73913
MY2147	MY	WT	rep3	9	78	31	0.397436
MY2147	MY	WT	rep3	11	104	13	0.125
MY2147	MY	WT	rep3	15	112	1	0.00892857
irld39_N2	N2	irld39	rep3	1	107	105	0.981308
irld39_N2	N2	irld39	rep3	3	110	105	0.954545
irld39_N2	N2	irld39	rep3	5	110	100	0.909091
irld39_N2	N2	irld39	rep3	7	75	63	0.84
irld39_N2	N2	irld39	rep3	9	49	30	0.612245
irld39_N2	N2	irld39	rep3	11	106	7	0.0660377
irld39_N2	N2	irld39	rep3	15	119	0	0
irld39_MY	MY	irld39	rep3	1	119	111	0.932773
irld39_MY	MY	irld39	rep3	3	105	98	0.933333
irld39_MY	MY	irld39	rep3	5	100	94	0.94
irld39_MY	MY	irld39	rep3	7	118	109	0.923729
irld39_MY	MY	irld39	rep3	9	107	60	0.560748
irld39_MY	MY	irld39	rep3	11	119	34	0.285714
irld39_MY	MY	irld39	rep3	15	118	8	0.0677966
irld52_N2	N2	irld52	rep3	1	117	112	0.957265
irld52_N2	N2	irld52	rep3	3	132	127	0.962121
irld52_N2	N2	irld52	rep3	5	131	118	0.900763
irld52_N2	N2	irld52	rep3	7	114	105	0.921053
irld52_N2	N2	irld52	rep3	9	137	82	0.59854
irld52_N2	N2	irld52	rep3	11	134	42	0.313433
irld52_N2	N2	irld52	rep3	15	136	3	0.0220588
irld52_MY	MY	irld52	rep3	1	76	71	0.934211
irld52_MY	MY	irld52	rep3	3	93	86	0.924731
irld52_MY	MY	irld52	rep3	5	95	78	0.821053
irld52_MY	MY	irld52	rep3	7	78	43	0.551282
irld52_MY	MY	irld52	rep3	9	75	28	0.373333
irld52_MY	MY	irld52	rep3	11	105	11	0.104762
irld52_MY	MY	irld52	rep3	15	116	0	0

## Sheet: Fig_3J
Strain	Strain_merge	Strain_merge2	Background	Day	Replicate	Plated	Alive	Survival	Notes
MY2147	MY2147	Background	MY2147	1	1	83	75	0.903614
LRB420	LRB420	irld-11	MY2147	1	1	100	99	0.99
LRB423	LRB423	irld-11	N2	1	1	109	103	0.944954
LRB426	LRB425/426	irld-57	N2	1	1	73	68	0.931507
LRB428	LRB427/428	irld-57	MY2147	1	1	90	89	0.988889
N2	N2	Background	N2	1	1	125	121	0.968
MY2147	MY2147	Background	MY2147	3	1	95	93	0.978947
LRB420	LRB420	irld-11	MY2147	3	1	115	107	0.930435
LRB423	LRB423	irld-11	N2	3	1	100	96	0.96
LRB426	LRB425/426	irld-57	N2	3	1	86	84	0.976744
LRB428	LRB427/428	irld-57	MY2147	3	1	80	80	1
N2	N2	Background	N2	3	1	111	105	0.945946
MY2147	MY2147	Background	MY2147	5	1	108	102	0.944444
LRB420	LRB420	irld-11	MY2147	5	1	92	76	0.826087
LRB423	LRB423	irld-11	N2	5	1	104	95	0.913462
LRB426	LRB425/426	irld-57	N2	5	1	77	67	0.87013
LRB428	LRB427/428	irld-57	MY2147	5	1	64	48	0.75
N2	N2	Background	N2	5	1	116	99	0.853448
MY2147	MY2147	Background	MY2147	7	1	89	84	0.94382
LRB420	LRB420	irld-11	MY2147	7	1	55	48	0.872727
LRB423	LRB423	irld-11	N2	7	1	102	89	0.872549
LRB426	LRB425/426	irld-57	N2	7	1	105	84	0.8
LRB428	LRB427/428	irld-57	MY2147	7	1	103	52	0.504854
N2	N2	Background	N2	7	1	116	100	0.862069
MY2147	MY2147	Background	MY2147	9	1	76	35	0.460526
LRB420	LRB420	irld-11	MY2147	9	1	78	39	0.5
LRB423	LRB423	irld-11	N2	9	1	109	95	0.87156
LRB426	LRB425/426	irld-57	N2	9	1	116	41	0.353448
LRB428	LRB427/428	irld-57	MY2147	9	1	127	12	0.0944882
N2	N2	Background	N2	9	1	117	50	0.42735
MY2147	MY2147	Background	MY2147	11	1	84	26	0.309524
LRB420	LRB420	irld-11	MY2147	11	1	82	10	0.121951
LRB423	LRB423	irld-11	N2	11	1	103	45	0.436893
LRB426	LRB425/426	irld-57	N2	11	1	84	10	0.119048
LRB428	LRB427/428	irld-57	MY2147	11	1	39	0	0
N2	N2	Background	N2	11	1	92	27	0.293478
MY2147	MY2147	Background	MY2147	13	1	90	4	0.0444444
LRB420	LRB420	irld-11	MY2147	13	1	86	4	0.0465116
LRB423	LRB423	irld-11	N2	13	1	111	38	0.342342
LRB426	LRB425/426	irld-57	N2	13	1	95	6	0.0631579
LRB428	LRB427/428	irld-57	MY2147	13	1	44	0	0
N2	N2	Background	N2	13	1	134	10	0.0746269
MY2147	MY2147	Background	MY2147	15	1	94	0	0
LRB420	LRB420	irld-11	MY2147	15	1	106	2	0.0188679
LRB423	LRB423	irld-11	N2	15	1	97	9	0.0927835
LRB426	LRB425/426	irld-57	N2	15	1	101	2	0.019802
N2	N2	Background	N2	15	1	198	4	0.020202
LRB420	LRB420	irld-11	MY2147	17	1	107	0	0
LRB423	LRB423	irld-11	N2	17	1	98	3	0.0306122
LRB426	LRB425/426	irld-57	N2	17	1	86	0	0
N2	N2	Background	N2	17	1	116	0	0
LRB423	LRB423	irld-11	N2	19	1	136	0	0
MY2147	MY2147	Background	MY2147	1	2	122	119	0.97541
LRB420	LRB420	irld-11	MY2147	1	2	87	83	0.954023
LRB423	LRB423	irld-11	N2	1	2	122	118	0.967213
LRB425	LRB425/426	irld-57	N2	1	2	154	142	0.922078
LRB427	LRB427/428	irld-57	MY2147	1	2	72	64	0.888889
N2	N2	Background	N2	1	2	130	125	0.961538
MY2147	MY2147	Background	MY2147	3	2	131	130	0.992366
LRB420	LRB420	irld-11	MY2147	3	2	111	72	0.648649
LRB423	LRB423	irld-11	N2	3	2	101	98	0.970297
LRB425	LRB425/426	irld-57	N2	3	2	136	122	0.897059
LRB427	LRB427/428	irld-57	MY2147	3	2	55	52	0.945455
N2	N2	Background	N2	3	2	121	108	0.892562
MY2147	MY2147	Background	MY2147	5	2	47	42	0.893617
LRB420	LRB420	irld-11	MY2147	5	2	64	54	0.84375
LRB423	LRB423	irld-11	N2	5	2	111	97	0.873874
LRB425	LRB425/426	irld-57	N2	5	2	164	135	0.823171
LRB427	LRB427/428	irld-57	MY2147	5	2	70	59	0.842857
N2	N2	Background	N2	5	2	75	68	0.906667
MY2147	MY2147	Background	MY2147	7	2	129	90	0.697674
LRB420	LRB420	irld-11	MY2147	7	2	113	55	0.486726
LRB423	LRB423	irld-11	N2	7	2	100	86	0.86
LRB425	LRB425/426	irld-57	N2	7	2	163	62	0.380368
LRB427	LRB427/428	irld-57	MY2147	7	2	81	72	0.888889
N2	N2	Background	N2	7	2	137	111	0.810219
MY2147	MY2147	Background	MY2147	9	2	150	25	0.166667
LRB420	LRB420	irld-11	MY2147	9	2	107	9	0.0841121
LRB423	LRB423	irld-11	N2	9	2	111	57	0.513514
LRB425	LRB425/426	irld-57	N2	9	2	145	7	0.0482759
LRB427	LRB427/428	irld-57	MY2147	9	2	74	29	0.391892
N2	N2	Background	N2	9	2	141	64	0.453901
MY2147	MY2147	Background	MY2147	11	2	109	0	0
LRB420	LRB420	irld-11	MY2147	11	2	14	0	0	Ran out of culture here
LRB423	LRB423	irld-11	N2	11	2	133	34	0.255639
LRB425	LRB425/426	irld-57	N2	11	2	151	0	0
LRB427	LRB427/428	irld-57	MY2147	11	2	63	8	0.126984
N2	N2	Background	N2	11	2	154	30	0.194805
LRB423	LRB423	irld-11	N2	13	2	110	3	0.0272727
LRB427	LRB427/428	irld-57	MY2147	13	2	81	1	0.0123457
N2	N2	Background	N2	13	2	130	4	0.0307692
LRB423	LRB423	irld-11	N2	15	2	134	1	0.00746269
LRB427	LRB427/428	irld-57	MY2147	15	2	76	1	0.0131579
N2	N2	Background	N2	15	2	156	1	0.00641026
LRB423	LRB423	irld-11	N2	17	2	124	0	0
LRB427	LRB427/428	irld-57	MY2147	17	2	95	0	0
N2	N2	Background	N2	17	2	152	1	0.00657895
N2	N2	Background	N2	19	2	164	0	0
MY2147	MY2147	Background	MY2147	1	3	76	74	0.973684
LRB420	LRB420	irld-11	MY2147	1	3	57	57	1
LRB423	LRB423	irld-11	N2	1	3	132	130	0.984848
LRB426	LRB425/426	irld-57	N2	1	3	110	110	1
LRB428	LRB427/428	irld-57	MY2147	1	3	101	96	0.950495
N2	N2	Background	N2	1	3	113	112	0.99115
MY2147	MY2147	Background	MY2147	3	3	88	87	0.988636
LRB420	LRB420	irld-11	MY2147	3	3	87	16	0.183908	Low density, use 200uL
LRB423	LRB423	irld-11	N2	3	3	137	127	0.927007
LRB426	LRB425/426	irld-57	N2	3	3	100	73	0.73
LRB428	LRB427/428	irld-57	MY2147	3	3	94	86	0.914894
N2	N2	Background	N2	3	3	84	76	0.904762
MY2147	MY2147	Background	MY2147	5	3	93	56	0.602151
LRB420	LRB420	irld-11	MY2147	5	3	63	3	0.047619
LRB423	LRB423	irld-11	N2	5	3	132	103	0.780303
LRB426	LRB425/426	irld-57	N2	5	3	41	17	0.414634
LRB428	LRB427/428	irld-57	MY2147	5	3	110	83	0.754545
N2	N2	Background	N2	5	3	98	77	0.785714
MY2147	MY2147	Background	MY2147	7	3	91	52	0.571429
LRB420	LRB420	irld-11	MY2147	7	3	67	2	0.0298507
LRB423	LRB423	irld-11	N2	7	3	147	113	0.768707
LRB426	LRB425/426	irld-57	N2	7	3	86	23	0.267442
LRB428	LRB427/428	irld-57	MY2147	7	3	91	29	0.318681
N2	N2	Background	N2	7	3	108	45	0.416667
MY2147	MY2147	Background	MY2147	9	3	101	30	0.29703
LRB420	LRB420	irld-11	MY2147	9	3	62	0	0
LRB423	LRB423	irld-11	N2	9	3	122	40	0.327869
LRB426	LRB425/426	irld-57	N2	9	3	86	12	0.139535
LRB428	LRB427/428	irld-57	MY2147	9	3	79	10	0.126582
N2	N2	Background	N2	9	3	92	19	0.206522
MY2147	MY2147	Background	MY2147	11	3	90	4	0.0444444
LRB420	LRB420	irld-11	MY2147	11	3	61	0	0
LRB423	LRB423	irld-11	N2	11	3	137	19	0.138686
LRB426	LRB425/426	irld-57	N2	11	3	127	5	0.0393701
LRB428	LRB427/428	irld-57	MY2147	11	3	114	1	0.00877193
N2	N2	Background	N2	11	3	88	2	0.0227273
MY2147	MY2147	Background	MY2147	13	3	105	0	0
LRB423	LRB423	irld-11	N2	13	3	145	5	0.0344828
LRB426	LRB425/426	irld-57	N2	13	3	129	2	0.0155039
LRB428	LRB427/428	irld-57	MY2147	13	3	103	0	0
N2	N2	Background	N2	13	3	122	0	0
LRB423	LRB423	irld-11	N2	15	3	156	0	0
LRB426	LRB425/426	irld-57	N2	15	3	102	0	0
MY2147	MY2147	Background	MY2147	1	4	106	104	0.981132
LRB420	LRB420	irld-11	MY2147	1	4	100	99	0.99
LRB423	LRB423	irld-11	N2	1	4	95	95	1
LRB425	LRB425/426	irld-57	N2	1	4	120	116	0.966667
LRB427	LRB427/428	irld-57	MY2147	1	4	71	68	0.957746
N2	N2	Background	N2	1	4	66	66	1
MY2147	MY2147	Background	MY2147	3	4	97	90	0.927835
LRB420	LRB420	irld-11	MY2147	3	4	108	105	0.972222
LRB423	LRB423	irld-11	N2	3	4	101	94	0.930693
LRB425	LRB425/426	irld-57	N2	3	4	107	105	0.981308
LRB427	LRB427/428	irld-57	MY2147	3	4	79	69	0.873418
N2	N2	Background	N2	3	4	84	75	0.892857
MY2147	MY2147	Background	MY2147	5	4	84	82	0.689076
LRB420	LRB420	irld-11	MY2147	5	4	119	118	1.42169
LRB423	LRB423	irld-11	N2	5	4	83	81	0.743119
LRB425	LRB425/426	irld-57	N2	5	4	109	101	1.42254
LRB427	LRB427/428	irld-57	MY2147	5	4	71	70	0.864198
N2	N2	Background	N2	5	4	81	79	0.822917
MY2147	MY2147	Background	MY2147	7	4	96	83	0.734513
LRB420	LRB420	irld-11	MY2147	7	4	113	101	0.918182
LRB423	LRB423	irld-11	N2	7	4	110	96	0.827586
LRB425	LRB425/426	irld-57	N2	7	4	116	108	1.38462
LRB427	LRB427/428	irld-57	MY2147	7	4	78	61	0.701149
N2	N2	Background	N2	7	4	87	82	0.931818
MY2147	MY2147	Background	MY2147	9	4	88	53	0.395522
LRB420	LRB420	irld-11	MY2147	9	4	134	61	0.544643
LRB423	LRB423	irld-11	N2	9	4	112	65	0.53719
LRB425	LRB425/426	irld-57	N2	9	4	121	83	0.864583
LRB427	LRB427/428	irld-57	MY2147	9	4	96	52	0.684211
N2	N2	Background	N2	9	4	76	63	0.684783
MY2147	MY2147	Background	MY2147	11	4	92	32	0.271186
LRB420	LRB420	irld-11	MY2147	11	4	118	50	0.485437
LRB423	LRB423	irld-11	N2	11	4	103	32	0.280702
LRB425	LRB425/426	irld-57	N2	11	4	114	46	0.541176
LRB427	LRB427/428	irld-57	MY2147	11	4	85	32	0.415584
N2	N2	Background	N2	11	4	77	55	0.714286
MY2147	MY2147	Background	MY2147	13	4	115	11	0.0956522
LRB420	LRB420	irld-11	MY2147	13	4	103	16	0.15534
LRB423	LRB423	irld-11	N2	13	4	119	14	0.117647
LRB425	LRB425/426	irld-57	N2	13	4	128	20	0.15625
LRB427	LRB427/428	irld-57	MY2147	13	4	99	22	0.222222
N2	N2	Background	N2	13	4	79	33	0.417722
MY2147	MY2147	Background	MY2147	15	4	121	0	0
LRB420	LRB420	irld-11	MY2147	15	4	131	2	0.0152672
LRB423	LRB423	irld-11	N2	15	4	90	1	0.0111111
LRB425	LRB425/426	irld-57	N2	15	4	142	4	0.028169
LRB427	LRB427/428	irld-57	MY2147	15	4	96	1	0.0104167
N2	N2	Background	N2	15	4	82	2	0.0243902
LRB420	LRB420	irld-11	MY2147	17	4	132	2	0.0151515
LRB423	LRB423	irld-11	N2	17	4	94	0	0
LRB425	LRB425/426	irld-57	N2	17	4	107	3	0.0280374
LRB427	LRB427/428	irld-57	MY2147	17	4	76	1	0.0131579
N2	N2	Background	N2	17	4	73	2	0.0273973
LRB420	LRB420	irld-11	MY2147	19	4	127	0	0
LRB425	LRB425/426	irld-57	N2	19	4	105	1	0.00952381
LRB427	LRB427/428	irld-57	MY2147	19	4	68	0	0
N2	N2	Background	N2	19	4	74	3	0.0405405
LRB425	LRB425/426	irld-57	N2	21	4	123	0	0
N2	N2	Background	N2	21	4	77	0	0
MY2147	MY2147	Background	MY2147	1	5	118	115	0.974576
LRB420	LRB420	irld-11	MY2147	1	5	115	109	0.947826
LRB423	LRB423	irld-11	N2	1	5	105	105	1
LRB426	LRB425/426	irld-57	N2	1	5	98	97	0.989796
LRB428	LRB427/428	irld-57	MY2147	1	5	92	92	1
N2	N2	Background	N2	1	5	39	39	1
MY2147	MY2147	Background	MY2147	3	5	94	77	0.819149
LRB420	LRB420	irld-11	MY2147	3	5	105	77	0.733333
LRB423	LRB423	irld-11	N2	3	5	89	80	0.898876
LRB426	LRB425/426	irld-57	N2	3	5	73	58	0.794521
LRB428	LRB427/428	irld-57	MY2147	3	5	107	90	0.841121
N2	N2	Background	N2	3	5	58	48	0.827586
MY2147	MY2147	Background	MY2147	5	5	96	72	0.75
LRB420	LRB420	irld-11	MY2147	5	5	130	109	0.838462
LRB423	LRB423	irld-11	N2	5	5	113	90	0.79646
LRB426	LRB425/426	irld-57	N2	5	5	69	44	0.637681
LRB428	LRB427/428	irld-57	MY2147	5	5	97	87	0.896907
N2	N2	Background	N2	5	5	51	45	0.882353
MY2147	MY2147	Background	MY2147	7	5	85	48	0.564706
LRB420	LRB420	irld-11	MY2147	7	5	99	59	0.59596
LRB423	LRB423	irld-11	N2	7	5	82	57	0.695122
LRB426	LRB425/426	irld-57	N2	7	5	76	40	0.526316
LRB428	LRB427/428	irld-57	MY2147	7	5	88	56	0.636364
N2	N2	Background	N2	7	5	60	43	0.716667
MY2147	MY2147	Background	MY2147	9	5	87	18	0.206897
LRB420	LRB420	irld-11	MY2147	9	5	108	38	0.351852
LRB423	LRB423	irld-11	N2	9	5	103	40	0.38835
LRB426	LRB425/426	irld-57	N2	9	5	74	10	0.135135
LRB428	LRB427/428	irld-57	MY2147	9	5	97	21	0.216495
N2	N2	Background	N2	9	5	33	18	0.545455
MY2147	MY2147	Background	MY2147	11	5	75	11	0.146667
LRB420	LRB420	irld-11	MY2147	11	5	125	49	0.392	Low density, use 200uL
LRB423	LRB423	irld-11	N2	11	5	145	79	0.544828
LRB426	LRB425/426	irld-57	N2	11	5	90	22	0.244444
LRB428	LRB427/428	irld-57	MY2147	11	5	103	28	0.271845
N2	N2	Background	N2	11	5	34	14	0.411765
MY2147	MY2147	Background	MY2147	13	5	104	10	0.0961538
LRB420	LRB420	irld-11	MY2147	13	5	108	33	0.305556
LRB423	LRB423	irld-11	N2	13	5	128	61	0.476562
LRB426	LRB425/426	irld-57	N2	13	5	76	4	0.0526316
LRB428	LRB427/428	irld-57	MY2147	13	5	123	15	0.121951
N2	N2	Background	N2	13	5	35	16	0.457143
MY2147	MY2147	Background	MY2147	15	5	76	2	0.0263158
LRB420	LRB420	irld-11	MY2147	15	5	123	16	0.130081
LRB423	LRB423	irld-11	N2	15	5	138	33	0.23913
LRB426	LRB425/426	irld-57	N2	15	5	66	3	0.0454545
LRB428	LRB427/428	irld-57	MY2147	15	5	155	5	0.0322581
N2	N2	Background	N2	15	5	29	4	0.137931
MY2147	MY2147	Background	MY2147	17	5	89	0	0
LRB420	LRB420	irld-11	MY2147	17	5	141	4	0.0283688
LRB423	LRB423	irld-11	N2	17	5	143	16	0.111888
LRB426	LRB425/426	irld-57	N2	17	5	79	0	0
LRB428	LRB427/428	irld-57	MY2147	17	5	108	0	0
N2	N2	Background	N2	17	5	24	3	0.125
LRB420	LRB420	irld-11	MY2147	19	5	105	0	0
LRB423	LRB423	irld-11	N2	19	5	124	6	0.0483871
N2	N2	Background	N2	19	5	21	1	0.047619
LRB423	LRB423	irld-11	N2	21	5	140	2	0.0142857
N2	N2	Background	N2	21	5	118	0	0
LRB423	LRB423	irld-11	N2	23	5	116	0	0

## Sheet: Fig_3K
strain	day	replicate	experimentId	imageFile	id	pass	length
N2	d1	rep1	tifs	../tifs/Snap-87735-Image Export-05.tif	1	TRUE	926.726
N2	d1	rep1	tifs	../tifs/Snap-87734-Image Export-04.tif	0	TRUE	942.354
N2	d1	rep1	tifs	../tifs/Snap-87734-Image Export-04.tif	1	TRUE	924.45
N2	d1	rep1	tifs	../tifs/Snap-87737-Image Export-07.tif	1	TRUE	945.387
N2	d1	rep1	tifs	../tifs/Snap-87737-Image Export-07.tif	2	TRUE	1024.25
N2	d1	rep1	tifs	../tifs/Snap-87737-Image Export-07.tif	3	TRUE	940.929
N2	d1	rep1	tifs	../tifs/Snap-87736-Image Export-06.tif	0	TRUE	992.364
N2	d1	rep1	tifs	../tifs/Snap-87731-Image Export-01.tif	0	TRUE	924.895
N2	d1	rep1	tifs	../tifs/Snap-87733-Image Export-03.tif	0	TRUE	931.682
N2	d1	rep1	tifs	../tifs/Snap-87733-Image Export-03.tif	3	TRUE	995.804
N2	d1	rep1	tifs	../tifs/Snap-87749-Image Export-19.tif	0	TRUE	961.016
N2	d1	rep1	tifs	../tifs/Snap-87749-Image Export-19.tif	1	TRUE	957.316
N2	d1	rep1	tifs	../tifs/Snap-87732-Image Export-02.tif	1	TRUE	943.112
N2	d1	rep1	tifs	../tifs/Snap-87732-Image Export-02.tif	2	TRUE	986.963
N2	d1	rep1	tifs	../tifs/Snap-87732-Image Export-02.tif	3	TRUE	918.015
N2	d1	rep1	tifs	../tifs/Snap-87732-Image Export-02.tif	4	TRUE	983.523
N2	d1	rep1	tifs	../tifs/Snap-87732-Image Export-02.tif	5	TRUE	968.562
N2	d1	rep1	tifs	../tifs/Snap-87752-Image Export-22.tif	0	TRUE	1014.47
N2	d1	rep1	tifs	../tifs/Snap-87753-Image Export-23.tif	0	TRUE	967.543
N2	d1	rep1	tifs	../tifs/Snap-87753-Image Export-23.tif	1	TRUE	982.673
N2	d1	rep1	tifs	../tifs/Snap-87750-Image Export-20.tif	0	TRUE	937.175
N2	d1	rep1	tifs	../tifs/Snap-87750-Image Export-20.tif	1	TRUE	939.58
N2	d1	rep1	tifs	../tifs/Snap-87751-Image Export-21.tif	0	TRUE	954.634
N2	d1	rep1	tifs	../tifs/Snap-87751-Image Export-21.tif	1	TRUE	929.093
N2	d1	rep1	tifs	../tifs/Snap-87756-Image Export-26.tif	0	TRUE	909.765
N2	d1	rep1	tifs	../tifs/Snap-87757-Image Export-27.tif	0	TRUE	998.653
N2	d1	rep1	tifs	../tifs/Snap-87754-Image Export-24.tif	0	TRUE	903.682
N2	d1	rep1	tifs	../tifs/Snap-87755-Image Export-25.tif	0	TRUE	964.103
N2	d1	rep1	tifs	../tifs/Snap-87755-Image Export-25.tif	1	TRUE	944.629
N2	d1	rep1	tifs	../tifs/Snap-87743-Image Export-13.tif	0	TRUE	1011.56
N2	d1	rep1	tifs	../tifs/Snap-87743-Image Export-13.tif	1	TRUE	990.089
N2	d1	rep1	tifs	../tifs/Snap-87738-Image Export-08.tif	0	TRUE	927.262
N2	d1	rep1	tifs	../tifs/Snap-87742-Image Export-12.tif	0	TRUE	896.634
N2	d1	rep1	tifs	../tifs/Snap-87742-Image Export-12.tif	1	TRUE	956.687
N2	d1	rep1	tifs	../tifs/Snap-87741-Image Export-11.tif	0	TRUE	998.301
N2	d1	rep1	tifs	../tifs/Snap-87747-Image Export-17.tif	0	TRUE	948.697
N2	d1	rep1	tifs	../tifs/Snap-87746-Image Export-16.tif	0	TRUE	967.895
N2	d1	rep1	tifs	../tifs/Snap-87745-Image Export-15.tif	0	TRUE	980.62
N2	d1	rep1	tifs	../tifs/Snap-87759-Image Export-29.tif	0	TRUE	902.035
N2	d1	rep1	tifs	../tifs/Snap-87761-Image Export-31.tif	1	TRUE	950.398
N2	d1	rep1	tifs	../tifs/Snap-87761-Image Export-31.tif	2	TRUE	982.137
N2	d1	rep1	tifs	../tifs/Snap-87761-Image Export-31.tif	3	TRUE	941.779
N2	d1	rep1	tifs	../tifs/Snap-87760-Image Export-30.tif	0	TRUE	1011.21
N2	d1	rep1	tifs	../tifs/Snap-87760-Image Export-30.tif	1	TRUE	827.74
MY2147	d1	rep1	tifs	../tifs/Snap-87671-Image Export-23.tif	0	TRUE	899.89
MY2147	d1	rep1	tifs	../tifs/Snap-87671-Image Export-23.tif	1	TRUE	953.562
MY2147	d1	rep1	tifs	../tifs/Snap-87671-Image Export-23.tif	2	TRUE	816.034
MY2147	d1	rep1	tifs	../tifs/Snap-87670-Image Export-22.tif	2	TRUE	914.407
MY2147	d1	rep1	tifs	../tifs/Snap-87670-Image Export-22.tif	3	TRUE	815.812
MY2147	d1	rep1	tifs	../tifs/Snap-87670-Image Export-22.tif	4	TRUE	877.918
MY2147	d1	rep1	tifs	../tifs/Snap-87670-Image Export-22.tif	5	TRUE	869.17
MY2147	d1	rep1	tifs	../tifs/Snap-87670-Image Export-22.tif	6	TRUE	901.943
MY2147	d1	rep1	tifs	../tifs/Snap-87659-Image Export-11.tif	0	TRUE	894.267
MY2147	d1	rep1	tifs	../tifs/Snap-87658-Image Export-10.tif	0	TRUE	860.735
MY2147	d1	rep1	tifs	../tifs/Snap-87658-Image Export-10.tif	1	TRUE	907.972
MY2147	d1	rep1	tifs	../tifs/Snap-87669-Image Export-21.tif	0	TRUE	910.967
MY2147	d1	rep1	tifs	../tifs/Snap-87669-Image Export-21.tif	1	TRUE	855.058
MY2147	d1	rep1	tifs	../tifs/Snap-87675-Image Export-27.tif	0	TRUE	900.112
MY2147	d1	rep1	tifs	../tifs/Snap-87682-Image Export-34.tif	0	TRUE	933.605
MY2147	d1	rep1	tifs	../tifs/Snap-87682-Image Export-34.tif	1	TRUE	881.986
MY2147	d1	rep1	tifs	../tifs/Snap-87682-Image Export-34.tif	2	TRUE	866.32
MY2147	d1	rep1	tifs	../tifs/Snap-87668-Image Export-20.tif	5	TRUE	919.808
MY2147	d1	rep1	tifs	../tifs/Snap-87668-Image Export-20.tif	6	TRUE	859.609
MY2147	d1	rep1	tifs	../tifs/Snap-87674-Image Export-26.tif	2	TRUE	774.42
MY2147	d1	rep1	tifs	../tifs/Snap-87683-Image Export-35.tif	0	TRUE	885.648
MY2147	d1	rep1	tifs	../tifs/Snap-87683-Image Export-35.tif	1	TRUE	885.112
MY2147	d1	rep1	tifs	../tifs/Snap-87683-Image Export-35.tif	3	TRUE	899.001
MY2147	d1	rep1	tifs	../tifs/Snap-87683-Image Export-35.tif	4	TRUE	740
MY2147	d1	rep1	tifs	../tifs/Snap-87681-Image Export-33.tif	1	TRUE	952.489
MY2147	d1	rep1	tifs	../tifs/Snap-87681-Image Export-33.tif	3	TRUE	910.247
MY2147	d1	rep1	tifs	../tifs/Snap-87680-Image Export-32.tif	0	TRUE	852.783
MY2147	d1	rep1	tifs	../tifs/Snap-87680-Image Export-32.tif	1	TRUE	879.527
MY2147	d1	rep1	tifs	../tifs/Snap-87680-Image Export-32.tif	2	TRUE	895.561
MY2147	d1	rep1	tifs	../tifs/Snap-87672-Image Export-24.tif	1	TRUE	902.035
MY2147	d1	rep1	tifs	../tifs/Snap-87672-Image Export-24.tif	3	TRUE	867.967
MY2147	d1	rep1	tifs	../tifs/Snap-87672-Image Export-24.tif	5	TRUE	945.257
MY2147	d1	rep1	tifs	../tifs/Snap-87672-Image Export-24.tif	6	TRUE	888.015
MY2147	d1	rep1	tifs	../tifs/Snap-87672-Image Export-24.tif	8	TRUE	872.165
MY2147	d1	rep1	tifs	../tifs/Snap-87672-Image Export-24.tif	9	TRUE	881.986
MY2147	d1	rep1	tifs	../tifs/Snap-87685-Image Export-37.tif	1	TRUE	935.972
MY2147	d1	rep1	tifs	../tifs/Snap-87673-Image Export-25.tif	2	TRUE	912.17
MY2147	d1	rep1	tifs	../tifs/Snap-87673-Image Export-25.tif	3	TRUE	888.199
MY2147	d1	rep1	tifs	../tifs/Snap-87684-Image Export-36.tif	0	TRUE	847.512
MY2147	d1	rep1	tifs	../tifs/Snap-87684-Image Export-36.tif	2	TRUE	935.436
MY2147	d1	rep1	tifs	../tifs/Snap-87684-Image Export-36.tif	3	TRUE	923.156
MY2147	d1	rep1	tifs	../tifs/Snap-87666-Image Export-18.tif	0	TRUE	918.199
MY2147	d1	rep1	tifs	../tifs/Snap-87667-Image Export-19.tif	0	TRUE	908.416
MY2147	d1	rep1	tifs	../tifs/Snap-87667-Image Export-19.tif	1	TRUE	886
MY2147	d1	rep1	tifs	../tifs/Snap-87652-Image Export-04.tif	0	TRUE	849.121
MY2147	d1	rep1	tifs	../tifs/Snap-87651-Image Export-03.tif	0	TRUE	984.726
MY2147	d1	rep1	tifs	../tifs/Snap-87650-Image Export-02.tif	0	TRUE	927.04
MY2147	d1	rep1	tifs	../tifs/Snap-87679-Image Export-31.tif	4	TRUE	894.803
MY2147	d1	rep1	tifs	../tifs/Snap-87679-Image Export-31.tif	5	TRUE	929.629
MY2147	d1	rep1	tifs	../tifs/Snap-87679-Image Export-31.tif	6	TRUE	846.624
MY2147	d1	rep1	tifs	../tifs/Snap-87679-Image Export-31.tif	7	TRUE	879.175
MY2147	d1	rep1	tifs	../tifs/Snap-87679-Image Export-31.tif	8	TRUE	891.938
MY2147	d1	rep1	tifs	../tifs/Snap-87679-Image Export-31.tif	10	TRUE	888.996
MY2147	d1	rep1	tifs	../tifs/Snap-87678-Image Export-30.tif	0	TRUE	900.204
MY2147	d1	rep1	tifs	../tifs/Snap-87678-Image Export-30.tif	3	TRUE	895.599
MY2147	d1	rep1	tifs	../tifs/Snap-87678-Image Export-30.tif	5	TRUE	886.813
MY2147	d1	rep1	tifs	../tifs/Snap-87649-Image Export-01.tif	0	TRUE	899.353
MY2147	d1	rep1	tifs	../tifs/Snap-87654-Image Export-06.tif	0	TRUE	782.909
MY2147	d1	rep1	tifs	../tifs/Snap-87657-Image Export-09.tif	0	TRUE	918.329
MY2147	d1	rep1	tifs	../tifs/Snap-87656-Image Export-08.tif	0	TRUE	937.213
MY2147	d1	rep1	tifs	../tifs/Snap-87663-Image Export-15.tif	0	TRUE	924.098
MY2147	d1	rep1	tifs	../tifs/Snap-87662-Image Export-14.tif	0	TRUE	885.204
MY2147	d1	rep1	tifs	../tifs/Snap-87660-Image Export-12.tif	0	TRUE	851.174
MY2147	d1	rep1	tifs	../tifs/Snap-87664-Image Export-16.tif	1	TRUE	876.808
MY2147	d1	rep1	tifs	../tifs/Snap-87665-Image Export-17.tif	0	TRUE	900.74
MY2147	d1	rep1	tifs	../tifs/Snap-87665-Image Export-17.tif	4	TRUE	877.03
MY2147	d1	rep1	tifs	../tifs/Snap-87665-Image Export-17.tif	5	TRUE	790.585
MY2147	d1	rep1	tifs	../tifs/Snap-87687-Image Export-39.tif	0	TRUE	895.653
MY2147	d1	rep1	tifs	../tifs/Snap-87687-Image Export-39.tif	1	TRUE	874.348
MY2147	d1	rep1	tifs	../tifs/Snap-87686-Image Export-38.tif	0	TRUE	832.919
MY2147	d1	rep1	tifs	../tifs/Snap-87686-Image Export-38.tif	1	TRUE	829.387
MY2147	d1	rep1	tifs	../tifs/Snap-87677-Image Export-29.tif	0	TRUE	932.127
MY2147	d1	rep1	tifs	../tifs/Snap-87677-Image Export-29.tif	1	TRUE	935.658
MY2147	d1	rep1	tifs	../tifs/Snap-87677-Image Export-29.tif	2	TRUE	890.069
MY2147	d1	rep1	tifs	../tifs/Snap-87677-Image Export-29.tif	3	TRUE	891.899
MY2147	d1	rep1	tifs	../tifs/Snap-87676-Image Export-28.tif	0	TRUE	891.938
N2_irld39	d1	rep1	tifs	../tifs/Snap-87639-Image Export-21.tif	0	TRUE	934.494
N2_irld39	d1	rep1	tifs	../tifs/Snap-87638-Image Export-20.tif	0	TRUE	923.286
N2_irld39	d1	rep1	tifs	../tifs/Snap-87647-Image Export-29.tif	0	TRUE	963.605
N2_irld39	d1	rep1	tifs	../tifs/Snap-87646-Image Export-28.tif	1	TRUE	898.097
N2_irld39	d1	rep1	tifs	../tifs/Snap-87646-Image Export-28.tif	2	TRUE	946.866
N2_irld39	d1	rep1	tifs	../tifs/Snap-87626-Image Export-08.tif	0	TRUE	982.543
N2_irld39	d1	rep1	tifs	../tifs/Snap-87626-Image Export-08.tif	1	TRUE	964.363
N2_irld39	d1	rep1	tifs	../tifs/Snap-87626-Image Export-08.tif	2	TRUE	953.784
N2_irld39	d1	rep1	tifs	../tifs/Snap-87626-Image Export-08.tif	3	TRUE	967.803
N2_irld39	d1	rep1	tifs	../tifs/Snap-87626-Image Export-08.tif	4	TRUE	952.895
N2_irld39	d1	rep1	tifs	../tifs/Snap-87627-Image Export-09.tif	1	TRUE	835.546
N2_irld39	d1	rep1	tifs	../tifs/Snap-87627-Image Export-09.tif	3	TRUE	935.344
N2_irld39	d1	rep1	tifs	../tifs/Snap-87636-Image Export-18.tif	0	TRUE	934.548
N2_irld39	d1	rep1	tifs	../tifs/Snap-87636-Image Export-18.tif	1	TRUE	955.17
N2_irld39	d1	rep1	tifs	../tifs/Snap-87636-Image Export-18.tif	4	TRUE	925.967
N2_irld39	d1	rep1	tifs	../tifs/Snap-87636-Image Export-18.tif	5	TRUE	946.016
N2_irld39	d1	rep1	tifs	../tifs/Snap-87637-Image Export-19.tif	0	TRUE	893.324
N2_irld39	d1	rep1	tifs	../tifs/Snap-87637-Image Export-19.tif	2	TRUE	936.064
N2_irld39	d1	rep1	tifs	../tifs/Snap-87637-Image Export-19.tif	3	TRUE	952.175
N2_irld39	d1	rep1	tifs	../tifs/Snap-87637-Image Export-19.tif	4	TRUE	973.296
N2_irld39	d1	rep1	tifs	../tifs/Snap-87637-Image Export-19.tif	5	TRUE	912.17
N2_irld39	d1	rep1	tifs	../tifs/Snap-87637-Image Export-19.tif	6	TRUE	894.083
N2_irld39	d1	rep1	tifs	../tifs/Snap-87619-Image Export-01.tif	1	TRUE	923.692
N2_irld39	d1	rep1	tifs	../tifs/Snap-87648-Image Export-30.tif	0	TRUE	974.997
N2_irld39	d1	rep1	tifs	../tifs/Snap-87633-Image Export-15.tif	1	TRUE	963.253
N2_irld39	d1	rep1	tifs	../tifs/Snap-87632-Image Export-14.tif	0	TRUE	878.01
N2_irld39	d1	rep1	tifs	../tifs/Snap-87632-Image Export-14.tif	1	TRUE	911.634
N2_irld39	d1	rep1	tifs	../tifs/Snap-87632-Image Export-14.tif	2	TRUE	898.465
N2_irld39	d1	rep1	tifs	../tifs/Snap-87630-Image Export-12.tif	0	TRUE	952.711
N2_irld39	d1	rep1	tifs	../tifs/Snap-87628-Image Export-10.tif	0	TRUE	863.547
N2_irld39	d1	rep1	tifs	../tifs/Snap-87628-Image Export-10.tif	1	TRUE	860.954
N2_irld39	d1	rep1	tifs	../tifs/Snap-87634-Image Export-16.tif	2	TRUE	935.788
N2_irld39	d1	rep1	tifs	../tifs/Snap-87634-Image Export-16.tif	3	TRUE	889.44
N2_irld39	d1	rep1	tifs	../tifs/Snap-87634-Image Export-16.tif	4	TRUE	863.547
N2_irld39	d1	rep1	tifs	../tifs/Snap-87634-Image Export-16.tif	5	TRUE	963.789
N2_irld39	d1	rep1	tifs	../tifs/Snap-87629-Image Export-11.tif	0	TRUE	950.528
N2_irld39	d1	rep1	tifs	../tifs/Snap-87635-Image Export-17.tif	2	TRUE	917.349
N2_irld39	d1	rep1	tifs	../tifs/Snap-87635-Image Export-17.tif	3	TRUE	965.398
N2_irld39	d1	rep1	tifs	../tifs/Snap-87635-Image Export-17.tif	4	TRUE	949.363
N2_irld39	d1	rep1	tifs	../tifs/Snap-87635-Image Export-17.tif	5	TRUE	950.252
N2_irld39	d1	rep1	tifs	../tifs/Snap-87642-Image Export-24.tif	0	TRUE	967.987
N2_irld39	d1	rep1	tifs	../tifs/Snap-87643-Image Export-25.tif	0	TRUE	961.736
N2_irld39	d1	rep1	tifs	../tifs/Snap-87643-Image Export-25.tif	1	TRUE	921.011
N2_irld39	d1	rep1	tifs	../tifs/Snap-87620-Image Export-02.tif	1	TRUE	942.354
N2_irld39	d1	rep1	tifs	../tifs/Snap-87620-Image Export-02.tif	2	TRUE	933.513
N2_irld39	d1	rep1	tifs	../tifs/Snap-87624-Image Export-06.tif	0	TRUE	920.789
N2_irld39	d1	rep1	tifs	../tifs/Snap-87624-Image Export-06.tif	3	TRUE	913.779
N2_irld39	d1	rep1	tifs	../tifs/Snap-87624-Image Export-06.tif	4	TRUE	918.643
N2_irld39	d1	rep1	tifs	../tifs/Snap-87624-Image Export-06.tif	5	TRUE	897.17
N2_irld39	d1	rep1	tifs	../tifs/Snap-87625-Image Export-07.tif	2	TRUE	949.586
N2_irld39	d1	rep1	tifs	../tifs/Snap-87625-Image Export-07.tif	3	TRUE	935.03
N2_irld39	d1	rep1	tifs	../tifs/Snap-87625-Image Export-07.tif	4	TRUE	936.953
N2_irld39	d1	rep1	tifs	../tifs/Snap-87645-Image Export-27.tif	2	TRUE	930.127
N2_irld39	d1	rep1	tifs	../tifs/Snap-87645-Image Export-27.tif	3	TRUE	911.412
N2_irld39	d1	rep1	tifs	../tifs/Snap-87645-Image Export-27.tif	4	TRUE	906.141
N2_irld39	d1	rep1	tifs	../tifs/Snap-87645-Image Export-27.tif	5	TRUE	910.783
N2_irld39	d1	rep1	tifs	../tifs/Snap-87645-Image Export-27.tif	8	TRUE	959.905
N2_irld39	d1	rep1	tifs	../tifs/Snap-87644-Image Export-26.tif	0	TRUE	927.262
N2_irld39	d1	rep1	tifs	../tifs/Snap-87644-Image Export-26.tif	1	TRUE	951.861
N2_irld39	d1	rep1	tifs	../tifs/Snap-87641-Image Export-23.tif	1	TRUE	941.465
N2_irld39	d1	rep1	tifs	../tifs/Snap-87641-Image Export-23.tif	3	TRUE	900.296
N2_irld39	d1	rep1	tifs	../tifs/Snap-87623-Image Export-05.tif	0	TRUE	975.755
N2_irld39	d1	rep1	tifs	../tifs/Snap-87623-Image Export-05.tif	1	TRUE	939.136
N2_irld39	d1	rep1	tifs	../tifs/Snap-87623-Image Export-05.tif	3	TRUE	739.15
N2_irld39	d1	rep1	tifs	../tifs/Snap-87622-Image Export-04.tif	0	TRUE	928.334
N2_irld39	d1	rep1	tifs	../tifs/Snap-87622-Image Export-04.tif	1	TRUE	927.262
N2_irld39	d1	rep1	tifs	../tifs/Snap-87622-Image Export-04.tif	2	TRUE	890.919
MY_irld39	d1	rep1	tifs	../tifs/Snap-87718-Image Export-30.tif	1	TRUE	863.363
MY_irld39	d1	rep1	tifs	../tifs/Snap-87719-Image Export-31.tif	0	TRUE	836.266
MY_irld39	d1	rep1	tifs	../tifs/Snap-87719-Image Export-31.tif	1	TRUE	939.948
MY_irld39	d1	rep1	tifs	../tifs/Snap-87719-Image Export-31.tif	3	TRUE	912.836
MY_irld39	d1	rep1	tifs	../tifs/Snap-87719-Image Export-31.tif	5	TRUE	935.474
MY_irld39	d1	rep1	tifs	../tifs/Snap-87707-Image Export-19.tif	0	TRUE	908.286
MY_irld39	d1	rep1	tifs	../tifs/Snap-87707-Image Export-19.tif	1	TRUE	915.166
MY_irld39	d1	rep1	tifs	../tifs/Snap-87707-Image Export-19.tif	2	TRUE	905.252
MY_irld39	d1	rep1	tifs	../tifs/Snap-87706-Image Export-18.tif	0	TRUE	930.145
MY_irld39	d1	rep1	tifs	../tifs/Snap-87706-Image Export-18.tif	1	TRUE	929.851
MY_irld39	d1	rep1	tifs	../tifs/Snap-87727-Image Export-39.tif	1	TRUE	907.842
MY_irld39	d1	rep1	tifs	../tifs/Snap-87726-Image Export-38.tif	1	TRUE	859.126
MY_irld39	d1	rep1	tifs	../tifs/Snap-87713-Image Export-25.tif	0	TRUE	887.165
MY_irld39	d1	rep1	tifs	../tifs/Snap-87712-Image Export-24.tif	0	TRUE	887.035
MY_irld39	d1	rep1	tifs	../tifs/Snap-87712-Image Export-24.tif	1	TRUE	816.662
MY_irld39	d1	rep1	tifs	../tifs/Snap-87696-Image Export-08.tif	0	TRUE	909.765
MY_irld39	d1	rep1	tifs	../tifs/Snap-87696-Image Export-08.tif	1	TRUE	893.638
MY_irld39	d1	rep1	tifs	../tifs/Snap-87697-Image Export-09.tif	0	TRUE	884.354
MY_irld39	d1	rep1	tifs	../tifs/Snap-87697-Image Export-09.tif	1	TRUE	932.311
MY_irld39	d1	rep1	tifs	../tifs/Snap-87710-Image Export-22.tif	0	TRUE	1000.67
MY_irld39	d1	rep1	tifs	../tifs/Snap-87711-Image Export-23.tif	0	TRUE	910.209
MY_irld39	d1	rep1	tifs	../tifs/Snap-87711-Image Export-23.tif	1	TRUE	783.575
MY_irld39	d1	rep1	tifs	../tifs/Snap-87708-Image Export-20.tif	0	TRUE	917.663
MY_irld39	d1	rep1	tifs	../tifs/Snap-87714-Image Export-26.tif	0	TRUE	916.238
MY_irld39	d1	rep1	tifs	../tifs/Snap-87709-Image Export-21.tif	2	TRUE	878.324
MY_irld39	d1	rep1	tifs	../tifs/Snap-87709-Image Export-21.tif	5	TRUE	873.238
MY_irld39	d1	rep1	tifs	../tifs/Snap-87715-Image Export-27.tif	0	TRUE	924.006
MY_irld39	d1	rep1	tifs	../tifs/Snap-87729-Image Export-41.tif	1	TRUE	866.764
MY_irld39	d1	rep1	tifs	../tifs/Snap-87716-Image Export-28.tif	0	TRUE	793.71
MY_irld39	d1	rep1	tifs	../tifs/Snap-87716-Image Export-28.tif	1	TRUE	937.305
MY_irld39	d1	rep1	tifs	../tifs/Snap-87728-Image Export-40.tif	0	TRUE	938.064
MY_irld39	d1	rep1	tifs	../tifs/Snap-87728-Image Export-40.tif	1	TRUE	906.049
MY_irld39	d1	rep1	tifs	../tifs/Snap-87717-Image Export-29.tif	0	TRUE	900.962
MY_irld39	d1	rep1	tifs	../tifs/Snap-87717-Image Export-29.tif	1	TRUE	903.644
MY_irld39	d1	rep1	tifs	../tifs/Snap-87690-Image Export-02.tif	0	TRUE	873.498
MY_irld39	d1	rep1	tifs	../tifs/Snap-87690-Image Export-02.tif	1	TRUE	888.107
MY_irld39	d1	rep1	tifs	../tifs/Snap-87690-Image Export-02.tif	2	TRUE	871.629
MY_irld39	d1	rep1	tifs	../tifs/Snap-87730-Image Export-42.tif	0	TRUE	870.464
MY_irld39	d1	rep1	tifs	../tifs/Snap-87722-Image Export-34.tif	1	TRUE	837.725
MY_irld39	d1	rep1	tifs	../tifs/Snap-87694-Image Export-06.tif	0	TRUE	815.145
MY_irld39	d1	rep1	tifs	../tifs/Snap-87689-Image Export-01.tif	0	TRUE	916.813
MY_irld39	d1	rep1	tifs	../tifs/Snap-87723-Image Export-35.tif	1	TRUE	878.861
MY_irld39	d1	rep1	tifs	../tifs/Snap-87723-Image Export-35.tif	2	TRUE	599.217
MY_irld39	d1	rep1	tifs	../tifs/Snap-87723-Image Export-35.tif	3	TRUE	627.477
MY_irld39	d1	rep1	tifs	../tifs/Snap-87695-Image Export-07.tif	1	TRUE	884.706
MY_irld39	d1	rep1	tifs	../tifs/Snap-87695-Image Export-07.tif	2	TRUE	906.991
MY_irld39	d1	rep1	tifs	../tifs/Snap-87721-Image Export-33.tif	0	TRUE	907.344
MY_irld39	d1	rep1	tifs	../tifs/Snap-87720-Image Export-32.tif	1	TRUE	913.243
MY_irld39	d1	rep1	tifs	../tifs/Snap-87693-Image Export-05.tif	0	TRUE	929.093
MY_irld39	d1	rep1	tifs	../tifs/Snap-87692-Image Export-04.tif	0	TRUE	934.494
MY_irld39	d1	rep1	tifs	../tifs/Snap-87724-Image Export-36.tif	1	TRUE	837.247
MY_irld39	d1	rep1	tifs	../tifs/Snap-87724-Image Export-36.tif	2	TRUE	862.382
MY_irld39	d1	rep1	tifs	../tifs/Snap-87701-Image Export-13.tif	0	TRUE	904.402
MY_irld39	d1	rep1	tifs	../tifs/Snap-87700-Image Export-12.tif	0	TRUE	919.364
MY_irld39	d1	rep1	tifs	../tifs/Snap-87705-Image Export-17.tif	0	TRUE	863.325
MY_irld39	d1	rep1	tifs	../tifs/Snap-87705-Image Export-17.tif	2	TRUE	901.591
MY_irld39	d1	rep1	tifs	../tifs/Snap-87704-Image Export-16.tif	0	TRUE	946.238
MY_irld39	d1	rep1	tifs	../tifs/Snap-87704-Image Export-16.tif	2	TRUE	896.634
MY_irld39	d1	rep1	tifs	../tifs/Snap-87698-Image Export-10.tif	0	TRUE	894.803
MY_irld39	d1	rep1	tifs	../tifs/Snap-87699-Image Export-11.tif	0	TRUE	849.972
MY_irld39	d1	rep1	tifs	../tifs/Snap-87699-Image Export-11.tif	2	TRUE	936.509
MY_irld39	d1	rep1	tifs	../tifs/Snap-87702-Image Export-14.tif	0	TRUE	870.02
MY_irld39	d1	rep1	tifs	../tifs/Snap-87703-Image Export-15.tif	0	TRUE	885.648
N2_irld52	d1	rep1	tifs	../tifs/Snap-87790-Image Export-28.tif	2	TRUE	888.996
N2_irld52	d1	rep1	tifs	../tifs/Snap-87790-Image Export-28.tif	3	TRUE	984.282
N2_irld52	d1	rep1	tifs	../tifs/Snap-87791-Image Export-29.tif	2	TRUE	910.117
N2_irld52	d1	rep1	tifs	../tifs/Snap-87779-Image Export-17.tif	0	TRUE	874.793
N2_irld52	d1	rep1	tifs	../tifs/Snap-87763-Image Export-01.tif	0	TRUE	981.156
N2_irld52	d1	rep1	tifs	../tifs/Snap-87778-Image Export-16.tif	2	TRUE	970.04
N2_irld52	d1	rep1	tifs	../tifs/Snap-87766-Image Export-04.tif	0	TRUE	962.31
N2_irld52	d1	rep1	tifs	../tifs/Snap-87766-Image Export-04.tif	1	TRUE	845.329
N2_irld52	d1	rep1	tifs	../tifs/Snap-87767-Image Export-05.tif	0	TRUE	960.257
N2_irld52	d1	rep1	tifs	../tifs/Snap-87767-Image Export-05.tif	1	TRUE	998.523
N2_irld52	d1	rep1	tifs	../tifs/Snap-87767-Image Export-05.tif	2	TRUE	929.851
N2_irld52	d1	rep1	tifs	../tifs/Snap-87767-Image Export-05.tif	3	TRUE	929.093
N2_irld52	d1	rep1	tifs	../tifs/Snap-87767-Image Export-05.tif	4	TRUE	929.093
N2_irld52	d1	rep1	tifs	../tifs/Snap-87764-Image Export-02.tif	0	TRUE	898.725
N2_irld52	d1	rep1	tifs	../tifs/Snap-87764-Image Export-02.tif	1	TRUE	942.002
N2_irld52	d1	rep1	tifs	../tifs/Snap-87775-Image Export-13.tif	0	TRUE	871.981
N2_irld52	d1	rep1	tifs	../tifs/Snap-87775-Image Export-13.tif	1	TRUE	912.078
N2_irld52	d1	rep1	tifs	../tifs/Snap-87774-Image Export-12.tif	0	TRUE	924.136
N2_irld52	d1	rep1	tifs	../tifs/Snap-87774-Image Export-12.tif	1	TRUE	835.362
N2_irld52	d1	rep1	tifs	../tifs/Snap-87772-Image Export-10.tif	0	TRUE	920.16
N2_irld52	d1	rep1	tifs	../tifs/Snap-87772-Image Export-10.tif	1	TRUE	914.353
N2_irld52	d1	rep1	tifs	../tifs/Snap-87772-Image Export-10.tif	2	TRUE	907.436
N2_irld52	d1	rep1	tifs	../tifs/Snap-87769-Image Export-07.tif	0	TRUE	904.624
N2_irld52	d1	rep1	tifs	../tifs/Snap-87768-Image Export-06.tif	0	TRUE	958.074
N2_irld52	d1	rep1	tifs	../tifs/Snap-87768-Image Export-06.tif	1	TRUE	967.137
N2_irld52	d1	rep1	tifs	../tifs/Snap-87776-Image Export-14.tif	0	TRUE	827.74
N2_irld52	d1	rep1	tifs	../tifs/Snap-87777-Image Export-15.tif	1	TRUE	904.494
N2_irld52	d1	rep1	tifs	../tifs/Snap-87771-Image Export-09.tif	0	TRUE	949.992
N2_irld52	d1	rep1	tifs	../tifs/Snap-87770-Image Export-08.tif	0	TRUE	942.538
N2_irld52	d1	rep1	tifs	../tifs/Snap-87783-Image Export-21.tif	2	TRUE	182.711
N2_irld52	d1	rep1	tifs	../tifs/Snap-87783-Image Export-21.tif	3	TRUE	965.436
N2_irld52	d1	rep1	tifs	../tifs/Snap-87782-Image Export-20.tif	0	TRUE	907.658
N2_irld52	d1	rep1	tifs	../tifs/Snap-87782-Image Export-20.tif	1	TRUE	910.653
N2_irld52	d1	rep1	tifs	../tifs/Snap-87787-Image Export-25.tif	0	TRUE	911.634
N2_irld52	d1	rep1	tifs	../tifs/Snap-87787-Image Export-25.tif	1	TRUE	932.035
N2_irld52	d1	rep1	tifs	../tifs/Snap-87786-Image Export-24.tif	0	TRUE	937.175
N2_irld52	d1	rep1	tifs	../tifs/Snap-87786-Image Export-24.tif	2	TRUE	905.676
N2_irld52	d1	rep1	tifs	../tifs/Snap-87786-Image Export-24.tif	3	TRUE	944.813
N2_irld52	d1	rep1	tifs	../tifs/Snap-87781-Image Export-19.tif	0	TRUE	939.764
N2_irld52	d1	rep1	tifs	../tifs/Snap-87781-Image Export-19.tif	1	TRUE	868.541
N2_irld52	d1	rep1	tifs	../tifs/Snap-87780-Image Export-18.tif	0	TRUE	932.349
N2_irld52	d1	rep1	tifs	../tifs/Snap-87780-Image Export-18.tif	3	TRUE	937.619
N2_irld52	d1	rep1	tifs	../tifs/Snap-87784-Image Export-22.tif	0	TRUE	937.619
N2_irld52	d1	rep1	tifs	../tifs/Snap-87784-Image Export-22.tif	5	TRUE	914.667
N2_irld52	d1	rep1	tifs	../tifs/Snap-87785-Image Export-23.tif	1	TRUE	871.223
N2_irld52	d1	rep1	tifs	../tifs/Snap-87785-Image Export-23.tif	2	TRUE	879.933
N2_irld52	d1	rep1	tifs	../tifs/Snap-87785-Image Export-23.tif	4	TRUE	943.741
N2_irld52	d1	rep1	tifs	../tifs/Snap-87794-Image Export-32.tif	0	TRUE	952.229
N2_irld52	d1	rep1	tifs	../tifs/Snap-87794-Image Export-32.tif	1	TRUE	900.832
N2_irld52	d1	rep1	tifs	../tifs/Snap-87795-Image Export-33.tif	0	TRUE	903.015
N2_irld52	d1	rep1	tifs	../tifs/Snap-87795-Image Export-33.tif	2	TRUE	927.04
N2_irld52	d1	rep1	tifs	../tifs/Snap-87795-Image Export-33.tif	3	TRUE	916.146
N2_irld52	d1	rep1	tifs	../tifs/Snap-87795-Image Export-33.tif	4	TRUE	941.91
N2_irld52	d1	rep1	tifs	../tifs/Snap-87793-Image Export-31.tif	0	TRUE	872.924
N2_irld52	d1	rep1	tifs	../tifs/Snap-87793-Image Export-31.tif	1	TRUE	944.813
N2_irld52	d1	rep1	tifs	../tifs/Snap-87793-Image Export-31.tif	2	TRUE	927.17
N2_irld52	d1	rep1	tifs	../tifs/Snap-87793-Image Export-31.tif	3	TRUE	961.774
N2_irld52	d1	rep1	tifs	../tifs/Snap-87788-Image Export-26.tif	0	TRUE	967.045
N2_irld52	d1	rep1	tifs	../tifs/Snap-87788-Image Export-26.tif	1	TRUE	901.813
N2_irld52	d1	rep1	tifs	../tifs/Snap-87788-Image Export-26.tif	3	TRUE	928.871
N2_irld52	d1	rep1	tifs	../tifs/Snap-87788-Image Export-26.tif	4	TRUE	942.224
N2_irld52	d1	rep1	tifs	../tifs/Snap-87792-Image Export-30.tif	1	TRUE	931.054
N2_irld52	d1	rep1	tifs	../tifs/Snap-87792-Image Export-30.tif	4	TRUE	919.494
N2_irld52	d1	rep1	tifs	../tifs/Snap-87792-Image Export-30.tif	5	TRUE	925.431
N2_irld52	d1	rep1	tifs	../tifs/Snap-87789-Image Export-27.tif	0	TRUE	933.605
N2_irld52	d1	rep1	tifs	../tifs/Snap-87789-Image Export-27.tif	1	TRUE	922.489
N2_irld52	d1	rep1	tifs	../tifs/Snap-87789-Image Export-27.tif	2	TRUE	930.388
N2_irld52	d1	rep1	tifs	../tifs/Snap-87789-Image Export-27.tif	3	TRUE	910.875
MY_irld52	d1	rep1	tifs	../tifs/Snap-87594-Image Export-03.tif	0	TRUE	898.373
MY_irld52	d1	rep1	tifs	../tifs/Snap-87594-Image Export-03.tif	1	TRUE	895.155
MY_irld52	d1	rep1	tifs	../tifs/Snap-87596-Image Export-05.tif	1	TRUE	959.499
MY_irld52	d1	rep1	tifs	../tifs/Snap-87596-Image Export-05.tif	2	TRUE	888.146
MY_irld52	d1	rep1	tifs	../tifs/Snap-87596-Image Export-05.tif	5	TRUE	918.958
MY_irld52	d1	rep1	tifs	../tifs/Snap-87593-Image Export-02.tif	0	TRUE	920.068
MY_irld52	d1	rep1	tifs	../tifs/Snap-87593-Image Export-02.tif	1	TRUE	939.45
MY_irld52	d1	rep1	tifs	../tifs/Snap-87595-Image Export-04.tif	0	TRUE	887.831
MY_irld52	d1	rep1	tifs	../tifs/Snap-87595-Image Export-04.tif	1	TRUE	916.552
MY_irld52	d1	rep1	tifs	../tifs/Snap-87595-Image Export-04.tif	2	TRUE	915.426
MY_irld52	d1	rep1	tifs	../tifs/Snap-87595-Image Export-04.tif	3	TRUE	875.383
MY_irld52	d1	rep1	tifs	../tifs/Snap-87595-Image Export-04.tif	4	TRUE	896.45
MY_irld52	d1	rep1	tifs	../tifs/Snap-87592-Image Export-01.tif	0	TRUE	859.256
MY_irld52	d1	rep1	tifs	../tifs/Snap-87592-Image Export-01.tif	1	TRUE	945.165
MY_irld52	d1	rep1	tifs	../tifs/Snap-87597-Image Export-06.tif	1	TRUE	956.465
MY_irld52	d1	rep1	tifs	../tifs/Snap-87597-Image Export-06.tif	2	TRUE	877.214
MY_irld52	d1	rep1	tifs	../tifs/Snap-87603-Image Export-12.tif	0	TRUE	881.672
MY_irld52	d1	rep1	tifs	../tifs/Snap-87601-Image Export-10.tif	0	TRUE	919.716
MY_irld52	d1	rep1	tifs	../tifs/Snap-87601-Image Export-10.tif	1	TRUE	878.731
MY_irld52	d1	rep1	tifs	../tifs/Snap-87601-Image Export-10.tif	2	TRUE	942.354
MY_irld52	d1	rep1	tifs	../tifs/Snap-87601-Image Export-10.tif	4	TRUE	883.817
MY_irld52	d1	rep1	tifs	../tifs/Snap-87601-Image Export-10.tif	5	TRUE	899.093
MY_irld52	d1	rep1	tifs	../tifs/Snap-87606-Image Export-15.tif	0	TRUE	917.349
MY_irld52	d1	rep1	tifs	../tifs/Snap-87607-Image Export-16.tif	0	TRUE	915.388
MY_irld52	d1	rep1	tifs	../tifs/Snap-87607-Image Export-16.tif	1	TRUE	876.9
MY_irld52	d1	rep1	tifs	../tifs/Snap-87602-Image Export-11.tif	0	TRUE	892.972
MY_irld52	d1	rep1	tifs	../tifs/Snap-87602-Image Export-11.tif	1	TRUE	871.093
MY_irld52	d1	rep1	tifs	../tifs/Snap-87605-Image Export-14.tif	0	TRUE	910.431
MY_irld52	d1	rep1	tifs	../tifs/Snap-87605-Image Export-14.tif	1	TRUE	860.957
MY_irld52	d1	rep1	tifs	../tifs/Snap-87598-Image Export-07.tif	0	TRUE	954.32
MY_irld52	d1	rep1	tifs	../tifs/Snap-87598-Image Export-07.tif	2	TRUE	930.572
MY_irld52	d1	rep1	tifs	../tifs/Snap-87604-Image Export-13.tif	0	TRUE	946.552
MY_irld52	d1	rep1	tifs	../tifs/Snap-87604-Image Export-13.tif	1	TRUE	897.929
MY_irld52	d1	rep1	tifs	../tifs/Snap-87618-Image Export-27.tif	2	TRUE	818.179
MY_irld52	d1	rep1	tifs	../tifs/Snap-87600-Image Export-09.tif	1	TRUE	906.639
MY_irld52	d1	rep1	tifs	../tifs/Snap-87609-Image Export-18.tif	1	TRUE	915.296
MY_irld52	d1	rep1	tifs	../tifs/Snap-87614-Image Export-23.tif	1	TRUE	922.804
MY_irld52	d1	rep1	tifs	../tifs/Snap-87614-Image Export-23.tif	2	TRUE	924.412
MY_irld52	d1	rep1	tifs	../tifs/Snap-87613-Image Export-22.tif	1	TRUE	843.72
MY_irld52	d1	rep1	tifs	../tifs/Snap-87613-Image Export-22.tif	2	TRUE	899.223
MY_irld52	d1	rep1	tifs	../tifs/Snap-87616-Image Export-25.tif	0	TRUE	979.103
MY_irld52	d1	rep1	tifs	../tifs/Snap-87611-Image Export-20.tif	1	TRUE	956.373
MY_irld52	d1	rep1	tifs	../tifs/Snap-87611-Image Export-20.tif	2	TRUE	845.773
MY_irld52	d1	rep1	tifs	../tifs/Snap-87617-Image Export-26.tif	3	TRUE	924.044
MY_irld52	d1	rep1	tifs	../tifs/Snap-87612-Image Export-21.tif	0	TRUE	924.228
MY_irld52	d1	rep1	tifs	../tifs/Snap-87612-Image Export-21.tif	1	TRUE	848.011
N2	d1	rep2	tifs	../tifs/Snap-88777-Image Export-29.tif	0	TRUE	858.054
N2	d1	rep2	tifs	../tifs/Snap-88777-Image Export-29.tif	1	TRUE	825.503
N2	d1	rep2	tifs	../tifs/Snap-88777-Image Export-29.tif	2	TRUE	888.904
N2	d1	rep2	tifs	../tifs/Snap-88776-Image Export-28.tif	1	TRUE	762.638
N2	d1	rep2	tifs	../tifs/Snap-88757-Image Export-09.tif	0	TRUE	857.426
N2	d1	rep2	tifs	../tifs/Snap-88757-Image Export-09.tif	1	TRUE	834.88
N2	d1	rep2	tifs	../tifs/Snap-88757-Image Export-09.tif	2	TRUE	866.764
N2	d1	rep2	tifs	../tifs/Snap-88756-Image Export-08.tif	1	TRUE	872.517
N2	d1	rep2	tifs	../tifs/Snap-88756-Image Export-08.tif	2	TRUE	872.609
N2	d1	rep2	tifs	../tifs/Snap-88763-Image Export-15.tif	1	TRUE	853.227
N2	d1	rep2	tifs	../tifs/Snap-88763-Image Export-15.tif	2	TRUE	872.701
N2	d1	rep2	tifs	../tifs/Snap-88763-Image Export-15.tif	4	TRUE	872.073
N2	d1	rep2	tifs	../tifs/Snap-88763-Image Export-15.tif	5	TRUE	874.793
N2	d1	rep2	tifs	../tifs/Snap-88762-Image Export-14.tif	0	TRUE	884.576
N2	d1	rep2	tifs	../tifs/Snap-88760-Image Export-12.tif	1	TRUE	902.885
N2	d1	rep2	tifs	../tifs/Snap-88760-Image Export-12.tif	2	TRUE	946.33
N2	d1	rep2	tifs	../tifs/Snap-88760-Image Export-12.tif	4	TRUE	901.276
N2	d1	rep2	tifs	../tifs/Snap-88760-Image Export-12.tif	5	TRUE	921.195
N2	d1	rep2	tifs	../tifs/Snap-88764-Image Export-16.tif	0	TRUE	899.131
N2	d1	rep2	tifs	../tifs/Snap-88764-Image Export-16.tif	1	TRUE	865.155
N2	d1	rep2	tifs	../tifs/Snap-88764-Image Export-16.tif	2	TRUE	895.155
N2	d1	rep2	tifs	../tifs/Snap-88764-Image Export-16.tif	3	TRUE	861.494
N2	d1	rep2	tifs	../tifs/Snap-88764-Image Export-16.tif	4	TRUE	848.233
N2	d1	rep2	tifs	../tifs/Snap-88764-Image Export-16.tif	5	TRUE	934.586
N2	d1	rep2	tifs	../tifs/Snap-88765-Image Export-17.tif	0	TRUE	921.953
N2	d1	rep2	tifs	../tifs/Snap-88765-Image Export-17.tif	1	TRUE	864.619
N2	d1	rep2	tifs	../tifs/Snap-88765-Image Export-17.tif	2	TRUE	933.291
N2	d1	rep2	tifs	../tifs/Snap-88766-Image Export-18.tif	1	TRUE	938.654
N2	d1	rep2	tifs	../tifs/Snap-88766-Image Export-18.tif	2	TRUE	883.817
N2	d1	rep2	tifs	../tifs/Snap-88767-Image Export-19.tif	0	TRUE	910.653
N2	d1	rep2	tifs	../tifs/Snap-88767-Image Export-19.tif	1	TRUE	865.508
N2	d1	rep2	tifs	../tifs/Snap-88752-Image Export-04.tif	0	TRUE	850.416
N2	d1	rep2	tifs	../tifs/Snap-88753-Image Export-05.tif	1	TRUE	888.682
N2	d1	rep2	tifs	../tifs/Snap-88753-Image Export-05.tif	2	TRUE	886.537
N2	d1	rep2	tifs	../tifs/Snap-88751-Image Export-03.tif	2	TRUE	909.803
N2	d1	rep2	tifs	../tifs/Snap-88751-Image Export-03.tif	3	TRUE	897.837
N2	d1	rep2	tifs	../tifs/Snap-88751-Image Export-03.tif	4	TRUE	898.021
N2	d1	rep2	tifs	../tifs/Snap-88751-Image Export-03.tif	6	TRUE	870.464
N2	d1	rep2	tifs	../tifs/Snap-88750-Image Export-02.tif	0	TRUE	838.227
N2	d1	rep2	tifs	../tifs/Snap-88750-Image Export-02.tif	2	TRUE	863.899
N2	d1	rep2	tifs	../tifs/Snap-88750-Image Export-02.tif	3	TRUE	896.672
N2	d1	rep2	tifs	../tifs/Snap-88750-Image Export-02.tif	4	TRUE	874.532
N2	d1	rep2	tifs	../tifs/Snap-88749-Image Export-01.tif	1	TRUE	901.902
N2	d1	rep2	tifs	../tifs/Snap-88754-Image Export-06.tif	0	TRUE	878.677
N2	d1	rep2	tifs	../tifs/Snap-88754-Image Export-06.tif	1	TRUE	845.237
N2	d1	rep2	tifs	../tifs/Snap-88779-Image Export-31.tif	0	TRUE	914.001
N2	d1	rep2	tifs	../tifs/Snap-88778-Image Export-30.tif	1	TRUE	822.691
N2	d1	rep2	tifs	../tifs/Snap-88778-Image Export-30.tif	2	TRUE	902.165
N2	d1	rep2	tifs	../tifs/Snap-88770-Image Export-22.tif	0	TRUE	902.571
N2	d1	rep2	tifs	../tifs/Snap-88770-Image Export-22.tif	1	TRUE	869.576
N2	d1	rep2	tifs	../tifs/Snap-88775-Image Export-27.tif	0	TRUE	854.836
N2	d1	rep2	tifs	../tifs/Snap-88769-Image Export-21.tif	0	TRUE	854.614
N2	d1	rep2	tifs	../tifs/Snap-88782-Image Export-34.tif	1	TRUE	879.435
N2	d1	rep2	tifs	../tifs/Snap-88782-Image Export-34.tif	2	TRUE	909.987
N2	d1	rep2	tifs	../tifs/Snap-88783-Image Export-35.tif	1	TRUE	892.306
N2	d1	rep2	tifs	../tifs/Snap-88783-Image Export-35.tif	2	TRUE	925.431
N2	d1	rep2	tifs	../tifs/Snap-88759-Image Export-11.tif	0	TRUE	944.001
N2	d1	rep2	tifs	../tifs/Snap-88759-Image Export-11.tif	1	TRUE	876.363
N2	d1	rep2	tifs	../tifs/Snap-88759-Image Export-11.tif	2	TRUE	864.749
N2	d1	rep2	tifs	../tifs/Snap-88758-Image Export-10.tif	1	TRUE	907.88
N2	d1	rep2	tifs	../tifs/Snap-88758-Image Export-10.tif	2	TRUE	914.315
N2	d1	rep2	tifs	../tifs/Snap-88758-Image Export-10.tif	4	TRUE	957.316
N2	d1	rep2	tifs	../tifs/Snap-88780-Image Export-32.tif	0	TRUE	854.89
N2	d1	rep2	tifs	../tifs/Snap-88773-Image Export-25.tif	0	TRUE	901.813
N2	d1	rep2	tifs	../tifs/Snap-88784-Image Export-36.tif	0	TRUE	868.373
N2	d1	rep2	tifs	../tifs/Snap-88784-Image Export-36.tif	2	TRUE	856.981
MY2147	d1	rep2	tifs	../tifs/Snap-88799-Image Export-15.tif	0	TRUE	880.247
MY2147	d1	rep2	tifs	../tifs/Snap-88798-Image Export-14.tif	0	TRUE	908.784
MY2147	d1	rep2	tifs	../tifs/Snap-88813-Image Export-29.tif	0	TRUE	827.464
MY2147	d1	rep2	tifs	../tifs/Snap-88813-Image Export-29.tif	1	TRUE	906.049
MY2147	d1	rep2	tifs	../tifs/Snap-88785-Image Export-01.tif	0	TRUE	911.764
MY2147	d1	rep2	tifs	../tifs/Snap-88786-Image Export-02.tif	0	TRUE	892.658
MY2147	d1	rep2	tifs	../tifs/Snap-88786-Image Export-02.tif	1	TRUE	882.745
MY2147	d1	rep2	tifs	../tifs/Snap-88797-Image Export-13.tif	0	TRUE	904.624
MY2147	d1	rep2	tifs	../tifs/Snap-88796-Image Export-12.tif	0	TRUE	884.576
MY2147	d1	rep2	tifs	../tifs/Snap-88794-Image Export-10.tif	0	TRUE	844.034
MY2147	d1	rep2	tifs	../tifs/Snap-88801-Image Export-17.tif	0	TRUE	742.091
MY2147	d1	rep2	tifs	../tifs/Snap-88801-Image Export-17.tif	1	TRUE	872.517
MY2147	d1	rep2	tifs	../tifs/Snap-88789-Image Export-05.tif	0	TRUE	945.387
MY2147	d1	rep2	tifs	../tifs/Snap-88789-Image Export-05.tif	1	TRUE	861.938
MY2147	d1	rep2	tifs	../tifs/Snap-88789-Image Export-05.tif	2	TRUE	830.237
MY2147	d1	rep2	tifs	../tifs/Snap-88788-Image Export-04.tif	1	TRUE	889.218
MY2147	d1	rep2	tifs	../tifs/Snap-88788-Image Export-04.tif	2	TRUE	925.393
MY2147	d1	rep2	tifs	../tifs/Snap-88788-Image Export-04.tif	3	TRUE	901.905
MY2147	d1	rep2	tifs	../tifs/Snap-88791-Image Export-07.tif	1	TRUE	800.276
MY2147	d1	rep2	tifs	../tifs/Snap-88791-Image Export-07.tif	2	TRUE	838.634
MY2147	d1	rep2	tifs	../tifs/Snap-88790-Image Export-06.tif	2	TRUE	968.209
MY2147	d1	rep2	tifs	../tifs/Snap-88793-Image Export-09.tif	3	TRUE	950.75
MY2147	d1	rep2	tifs	../tifs/Snap-88793-Image Export-09.tif	4	TRUE	902.165
MY2147	d1	rep2	tifs	../tifs/Snap-88793-Image Export-09.tif	6	TRUE	783.705
MY2147	d1	rep2	tifs	../tifs/Snap-88792-Image Export-08.tif	2	TRUE	866.45
MY2147	d1	rep2	tifs	../tifs/Snap-88792-Image Export-08.tif	3	TRUE	950.75
MY2147	d1	rep2	tifs	../tifs/Snap-88792-Image Export-08.tif	4	TRUE	902.165
MY2147	d1	rep2	tifs	../tifs/Snap-88792-Image Export-08.tif	6	TRUE	783.705
MY2147	d1	rep2	tifs	../tifs/Snap-88806-Image Export-22.tif	0	TRUE	952.895
MY2147	d1	rep2	tifs	../tifs/Snap-88806-Image Export-22.tif	1	TRUE	861.808
MY2147	d1	rep2	tifs	../tifs/Snap-88806-Image Export-22.tif	2	TRUE	915.74
MY2147	d1	rep2	tifs	../tifs/Snap-88807-Image Export-23.tif	0	TRUE	820.01
MY2147	d1	rep2	tifs	../tifs/Snap-88807-Image Export-23.tif	1	TRUE	891.493
MY2147	d1	rep2	tifs	../tifs/Snap-88807-Image Export-23.tif	2	TRUE	805.638
MY2147	d1	rep2	tifs	../tifs/Snap-88803-Image Export-19.tif	0	TRUE	883.373
MY2147	d1	rep2	tifs	../tifs/Snap-88804-Image Export-20.tif	0	TRUE	884.17
MY2147	d1	rep2	tifs	../tifs/Snap-88804-Image Export-20.tif	1	TRUE	901.498
MY2147	d1	rep2	tifs	../tifs/Snap-88804-Image Export-20.tif	2	TRUE	842.112
MY2147	d1	rep2	tifs	../tifs/Snap-88802-Image Export-18.tif	0	TRUE	827.334
MY2147	d1	rep2	tifs	../tifs/Snap-88802-Image Export-18.tif	1	TRUE	887.793
MY2147	d1	rep2	tifs	../tifs/Snap-88802-Image Export-18.tif	5	TRUE	708.836
MY2147	d1	rep2	tifs	../tifs/Snap-88802-Image Export-18.tif	6	TRUE	931.46
MY2147	d1	rep2	tifs	../tifs/Snap-88815-Image Export-31.tif	0	TRUE	928.02
MY2147	d1	rep2	tifs	../tifs/Snap-88815-Image Export-31.tif	1	TRUE	880.784
MY2147	d1	rep2	tifs	../tifs/Snap-88808-Image Export-24.tif	0	TRUE	886.407
MY2147	d1	rep2	tifs	../tifs/Snap-88808-Image Export-24.tif	1	TRUE	830.367
MY2147	d1	rep2	tifs	../tifs/Snap-88809-Image Export-25.tif	1	TRUE	911.19
MY2147	d1	rep2	tifs	../tifs/Snap-88809-Image Export-25.tif	3	TRUE	812.242
MY2147	d1	rep2	tifs	../tifs/Snap-88810-Image Export-26.tif	1	TRUE	884.706
MY2147	d1	rep2	tifs	../tifs/Snap-88811-Image Export-27.tif	0	TRUE	939.542
N2_irld52	d1	rep2	tifs	../tifs/Snap-88665-Image Export-18.tif	0	TRUE	894.933
N2_irld52	d1	rep2	tifs	../tifs/Snap-88665-Image Export-18.tif	1	TRUE	933.957
N2_irld52	d1	rep2	tifs	../tifs/Snap-88652-Image Export-05.tif	0	TRUE	907.344
N2_irld52	d1	rep2	tifs	../tifs/Snap-88666-Image Export-19.tif	0	TRUE	826.131
N2_irld52	d1	rep2	tifs	../tifs/Snap-88666-Image Export-19.tif	1	TRUE	980.804
N2_irld52	d1	rep2	tifs	../tifs/Snap-88653-Image Export-06.tif	0	TRUE	817.29
N2_irld52	d1	rep2	tifs	../tifs/Snap-88653-Image Export-06.tif	1	TRUE	883.725
N2_irld52	d1	rep2	tifs	../tifs/Snap-88651-Image Export-04.tif	0	TRUE	912.522
N2_irld52	d1	rep2	tifs	../tifs/Snap-88678-Image Export-31.tif	1	TRUE	862.566
N2_irld52	d1	rep2	tifs	../tifs/Snap-88648-Image Export-01.tif	0	TRUE	865.063
N2_irld52	d1	rep2	tifs	../tifs/Snap-88649-Image Export-02.tif	1	TRUE	921.325
N2_irld52	d1	rep2	tifs	../tifs/Snap-88649-Image Export-02.tif	2	TRUE	904.846
N2_irld52	d1	rep2	tifs	../tifs/Snap-88649-Image Export-02.tif	3	TRUE	921.011
N2_irld52	d1	rep2	tifs	../tifs/Snap-88650-Image Export-03.tif	0	TRUE	912.17
N2_irld52	d1	rep2	tifs	../tifs/Snap-88677-Image Export-30.tif	1	TRUE	912.522
N2_irld52	d1	rep2	tifs	../tifs/Snap-88677-Image Export-30.tif	2	TRUE	841.353
N2_irld52	d1	rep2	tifs	../tifs/Snap-88682-Image Export-35.tif	0	TRUE	873.59
N2_irld52	d1	rep2	tifs	../tifs/Snap-88668-Image Export-21.tif	0	TRUE	935.474
N2_irld52	d1	rep2	tifs	../tifs/Snap-88668-Image Export-21.tif	1	TRUE	874.662
N2_irld52	d1	rep2	tifs	../tifs/Snap-88668-Image Export-21.tif	2	TRUE	924.803
N2_irld52	d1	rep2	tifs	../tifs/Snap-88668-Image Export-21.tif	3	TRUE	911.282
N2_irld52	d1	rep2	tifs	../tifs/Snap-88674-Image Export-27.tif	0	TRUE	651.724
N2_irld52	d1	rep2	tifs	../tifs/Snap-88674-Image Export-27.tif	1	TRUE	920.122
N2_irld52	d1	rep2	tifs	../tifs/Snap-88669-Image Export-22.tif	1	TRUE	906.991
N2_irld52	d1	rep2	tifs	../tifs/Snap-88669-Image Export-22.tif	2	TRUE	932.755
N2_irld52	d1	rep2	tifs	../tifs/Snap-88681-Image Export-34.tif	0	TRUE	881.45
N2_irld52	d1	rep2	tifs	../tifs/Snap-88659-Image Export-12.tif	0	TRUE	846.088
N2_irld52	d1	rep2	tifs	../tifs/Snap-88659-Image Export-12.tif	1	TRUE	881.856
N2_irld52	d1	rep2	tifs	../tifs/Snap-88659-Image Export-12.tif	3	TRUE	680.077
N2_irld52	d1	rep2	tifs	../tifs/Snap-88670-Image Export-23.tif	1	TRUE	899.131
N2_irld52	d1	rep2	tifs	../tifs/Snap-88670-Image Export-23.tif	2	TRUE	968.431
N2_irld52	d1	rep2	tifs	../tifs/Snap-88670-Image Export-23.tif	4	TRUE	894.933
N2_irld52	d1	rep2	tifs	../tifs/Snap-88673-Image Export-26.tif	0	TRUE	839.522
N2_irld52	d1	rep2	tifs	../tifs/Snap-88673-Image Export-26.tif	1	TRUE	924.803
N2_irld52	d1	rep2	tifs	../tifs/Snap-88673-Image Export-26.tif	2	TRUE	902.923
N2_irld52	d1	rep2	tifs	../tifs/Snap-88673-Image Export-26.tif	3	TRUE	858.904
N2_irld52	d1	rep2	tifs	../tifs/Snap-88671-Image Export-24.tif	0	TRUE	868.151
N2_irld52	d1	rep2	tifs	../tifs/Snap-88680-Image Export-33.tif	0	TRUE	893.102
N2_irld52	d1	rep2	tifs	../tifs/Snap-88680-Image Export-33.tif	1	TRUE	889.938
N2_irld52	d1	rep2	tifs	../tifs/Snap-88675-Image Export-28.tif	0	TRUE	880.822
N2_irld52	d1	rep2	tifs	../tifs/Snap-88675-Image Export-28.tif	1	TRUE	900.61
N2_irld52	d1	rep2	tifs	../tifs/Snap-88675-Image Export-28.tif	2	TRUE	813.13
N2_irld52	d1	rep2	tifs	../tifs/Snap-88655-Image Export-08.tif	0	TRUE	869.928
N2_irld52	d1	rep2	tifs	../tifs/Snap-88662-Image Export-15.tif	0	TRUE	930.388
N2_irld52	d1	rep2	tifs	../tifs/Snap-88662-Image Export-15.tif	1	TRUE	895.025
N2_irld52	d1	rep2	tifs	../tifs/Snap-88656-Image Export-09.tif	0	TRUE	912.392
N2_irld52	d1	rep2	tifs	../tifs/Snap-88656-Image Export-09.tif	1	TRUE	899.76
N2_irld52	d1	rep2	tifs	../tifs/Snap-88656-Image Export-09.tif	2	TRUE	951.102
N2_irld52	d1	rep2	tifs	../tifs/Snap-88656-Image Export-09.tif	3	TRUE	901.851
N2_irld52	d1	rep2	tifs	../tifs/Snap-88663-Image Export-16.tif	1	TRUE	875.643
N2_irld52	d1	rep2	tifs	../tifs/Snap-88663-Image Export-16.tif	2	TRUE	912.484
N2_irld52	d1	rep2	tifs	../tifs/Snap-88661-Image Export-14.tif	0	TRUE	852.377
N2_irld52	d1	rep2	tifs	../tifs/Snap-88661-Image Export-14.tif	1	TRUE	944.721
N2_irld52	d1	rep2	tifs	../tifs/Snap-88661-Image Export-14.tif	2	TRUE	940.707
N2_irld52	d1	rep2	tifs	../tifs/Snap-88664-Image Export-17.tif	0	TRUE	855.058
N2_irld52	d1	rep2	tifs	../tifs/Snap-88664-Image Export-17.tif	1	TRUE	896.542
MY_irld52	d1	rep2	tifs	../tifs/Snap-88637-Image Export-26.tif	0	TRUE	846.402
MY_irld52	d1	rep2	tifs	../tifs/Snap-88635-Image Export-24.tif	0	TRUE	841.445
MY_irld52	d1	rep2	tifs	../tifs/Snap-88632-Image Export-21.tif	0	TRUE	657.661
MY_irld52	d1	rep2	tifs	../tifs/Snap-88632-Image Export-21.tif	1	TRUE	869.89
MY_irld52	d1	rep2	tifs	../tifs/Snap-88632-Image Export-21.tif	3	TRUE	813.314
MY_irld52	d1	rep2	tifs	../tifs/Snap-88636-Image Export-25.tif	0	TRUE	757.589
MY_irld52	d1	rep2	tifs	../tifs/Snap-88630-Image Export-19.tif	0	TRUE	857.203
MY_irld52	d1	rep2	tifs	../tifs/Snap-88630-Image Export-19.tif	1	TRUE	768.299
MY_irld52	d1	rep2	tifs	../tifs/Snap-88629-Image Export-18.tif	0	TRUE	787.903
MY_irld52	d1	rep2	tifs	../tifs/Snap-88629-Image Export-18.tif	1	TRUE	762.232
MY_irld52	d1	rep2	tifs	../tifs/Snap-88634-Image Export-23.tif	0	TRUE	816.846
MY_irld52	d1	rep2	tifs	../tifs/Snap-88634-Image Export-23.tif	1	TRUE	844.571
MY_irld52	d1	rep2	tifs	../tifs/Snap-88620-Image Export-09.tif	0	TRUE	847.696
MY_irld52	d1	rep2	tifs	../tifs/Snap-88620-Image Export-09.tif	1	TRUE	865.47
MY_irld52	d1	rep2	tifs	../tifs/Snap-88614-Image Export-03.tif	0	TRUE	888.015
MY_irld52	d1	rep2	tifs	../tifs/Snap-88615-Image Export-04.tif	0	TRUE	861.624
MY_irld52	d1	rep2	tifs	../tifs/Snap-88615-Image Export-04.tif	1	TRUE	926.059
MY_irld52	d1	rep2	tifs	../tifs/Snap-88640-Image Export-29.tif	4	TRUE	878.194
MY_irld52	d1	rep2	tifs	../tifs/Snap-88641-Image Export-30.tif	0	TRUE	893.194
MY_irld52	d1	rep2	tifs	../tifs/Snap-88641-Image Export-30.tif	2	TRUE	841.353
MY_irld52	d1	rep2	tifs	../tifs/Snap-88646-Image Export-35.tif	0	TRUE	807.469
MY_irld52	d1	rep2	tifs	../tifs/Snap-88643-Image Export-32.tif	1	TRUE	862.122
MY_irld52	d1	rep2	tifs	../tifs/Snap-88624-Image Export-13.tif	1	TRUE	843.682
MY_irld52	d1	rep2	tifs	../tifs/Snap-88624-Image Export-13.tif	2	TRUE	903.015
MY_irld52	d1	rep2	tifs	../tifs/Snap-88639-Image Export-28.tif	2	TRUE	878.416
MY_irld52	d1	rep2	tifs	../tifs/Snap-88639-Image Export-28.tif	6	TRUE	934.272
MY_irld52	d1	rep2	tifs	../tifs/Snap-88639-Image Export-28.tif	7	TRUE	861.494
MY_irld52	d1	rep2	tifs	../tifs/Snap-88639-Image Export-28.tif	8	TRUE	858.016
MY_irld52	d1	rep2	tifs	../tifs/Snap-88647-Image Export-36.tif	1	TRUE	646.99
MY_irld52	d1	rep2	tifs	../tifs/Snap-88627-Image Export-16.tif	0	TRUE	908.416
MY_irld52	d1	rep2	tifs	../tifs/Snap-88622-Image Export-11.tif	0	TRUE	909.136
MY_irld52	d1	rep2	tifs	../tifs/Snap-88622-Image Export-11.tif	1	TRUE	852.431
MY_irld52	d1	rep2	tifs	../tifs/Snap-88622-Image Export-11.tif	2	TRUE	804.788
MY_irld52	d1	rep2	tifs	../tifs/Snap-88625-Image Export-14.tif	0	TRUE	881.45
MY_irld52	d1	rep2	tifs	../tifs/Snap-88625-Image Export-14.tif	1	TRUE	838.856
MY_irld52	d1	rep2	tifs	../tifs/Snap-88623-Image Export-12.tif	2	TRUE	915.388
MY_irld52	d1	rep2	tifs	../tifs/Snap-88644-Image Export-33.tif	0	TRUE	750.802
MY_irld52	d1	rep2	tifs	../tifs/Snap-88644-Image Export-33.tif	1	TRUE	841.575
MY_irld52	d1	rep2	tifs	../tifs/Snap-88621-Image Export-10.tif	0	TRUE	852.209
MY_irld52	d1	rep2	tifs	../tifs/Snap-88626-Image Export-15.tif	1	TRUE	825.595
MY_irld52	d1	rep2	tifs	../tifs/Snap-88628-Image Export-17.tif	0	TRUE	893.769
MY_irld52	d1	rep2	tifs	../tifs/Snap-88619-Image Export-08.tif	0	TRUE	851.58
MY_irld52	d1	rep2	tifs	../tifs/Snap-88619-Image Export-08.tif	1	TRUE	453.254
N2_irld39	d1	rep2	tifs	../tifs/Snap-88710-Image Export-27.tif	0	TRUE	904.532
N2_irld39	d1	rep2	tifs	../tifs/Snap-88710-Image Export-27.tif	1	TRUE	847.16
N2_irld39	d1	rep2	tifs	../tifs/Snap-88713-Image Export-30.tif	0	TRUE	865.6
N2_irld39	d1	rep2	tifs	../tifs/Snap-88713-Image Export-30.tif	1	TRUE	923.784
N2_irld39	d1	rep2	tifs	../tifs/Snap-88692-Image Export-09.tif	1	TRUE	854.928
N2_irld39	d1	rep2	tifs	../tifs/Snap-88692-Image Export-09.tif	2	TRUE	874.126
N2_irld39	d1	rep2	tifs	../tifs/Snap-88714-Image Export-31.tif	0	TRUE	843.72
N2_irld39	d1	rep2	tifs	../tifs/Snap-88714-Image Export-31.tif	1	TRUE	941.779
N2_irld39	d1	rep2	tifs	../tifs/Snap-88716-Image Export-33.tif	1	TRUE	781.208
N2_irld39	d1	rep2	tifs	../tifs/Snap-88705-Image Export-22.tif	0	TRUE	867.523
N2_irld39	d1	rep2	tifs	../tifs/Snap-88701-Image Export-18.tif	0	TRUE	892.88
N2_irld39	d1	rep2	tifs	../tifs/Snap-88706-Image Export-23.tif	1	TRUE	929.001
N2_irld39	d1	rep2	tifs	../tifs/Snap-88706-Image Export-23.tif	2	TRUE	903.996
N2_irld39	d1	rep2	tifs	../tifs/Snap-88702-Image Export-19.tif	0	TRUE	797.464
N2_irld39	d1	rep2	tifs	../tifs/Snap-88702-Image Export-19.tif	1	TRUE	823.228
N2_irld39	d1	rep2	tifs	../tifs/Snap-88702-Image Export-19.tif	6	TRUE	812.02
N2_irld39	d1	rep2	tifs	../tifs/Snap-88704-Image Export-21.tif	1	TRUE	833.141
N2_irld39	d1	rep2	tifs	../tifs/Snap-88703-Image Export-20.tif	0	TRUE	877.122
N2_irld39	d1	rep2	tifs	../tifs/Snap-88707-Image Export-24.tif	2	TRUE	941.189
N2_irld39	d1	rep2	tifs	../tifs/Snap-88707-Image Export-24.tif	6	TRUE	869.078
N2_irld39	d1	rep2	tifs	../tifs/Snap-88707-Image Export-24.tif	7	TRUE	926.726
N2_irld39	d1	rep2	tifs	../tifs/Snap-88707-Image Export-24.tif	9	TRUE	939.614
N2_irld39	d1	rep2	tifs	../tifs/Snap-88699-Image Export-16.tif	0	TRUE	905.16
N2_irld39	d1	rep2	tifs	../tifs/Snap-88699-Image Export-16.tif	1	TRUE	921.455
N2_irld39	d1	rep2	tifs	../tifs/Snap-88687-Image Export-04.tif	0	TRUE	955.209
N2_irld39	d1	rep2	tifs	../tifs/Snap-88687-Image Export-04.tif	1	TRUE	882.653
N2_irld39	d1	rep2	tifs	../tifs/Snap-88698-Image Export-15.tif	0	TRUE	910.875
N2_irld39	d1	rep2	tifs	../tifs/Snap-88685-Image Export-02.tif	1	TRUE	868.633
N2_irld39	d1	rep2	tifs	../tifs/Snap-88685-Image Export-02.tif	3	TRUE	974.054
N2_irld39	d1	rep2	tifs	../tifs/Snap-88695-Image Export-12.tif	1	TRUE	862.214
N2_irld39	d1	rep2	tifs	../tifs/Snap-88695-Image Export-12.tif	2	TRUE	888.238
N2_irld39	d1	rep2	tifs	../tifs/Snap-88694-Image Export-11.tif	0	TRUE	855.02
N2_irld39	d1	rep2	tifs	../tifs/Snap-88694-Image Export-11.tif	1	TRUE	844.571
N2_irld39	d1	rep2	tifs	../tifs/Snap-88694-Image Export-11.tif	2	TRUE	861.271
N2_irld39	d1	rep2	tifs	../tifs/Snap-88694-Image Export-11.tif	3	TRUE	897.078
N2_irld39	d1	rep2	tifs	../tifs/Snap-88690-Image Export-07.tif	0	TRUE	890.421
N2_irld39	d1	rep2	tifs	../tifs/Snap-88690-Image Export-07.tif	1	TRUE	910.561
N2_irld39	d1	rep2	tifs	../tifs/Snap-88693-Image Export-10.tif	1	TRUE	952.267
N2_irld39	d1	rep2	tifs	../tifs/Snap-88693-Image Export-10.tif	2	TRUE	938.156
N2_irld39	d1	rep2	tifs	../tifs/Snap-88693-Image Export-10.tif	3	TRUE	904.624
N2_irld39	d1	rep2	tifs	../tifs/Snap-88693-Image Export-10.tif	4	TRUE	955.929
N2_irld39	d1	rep2	tifs	../tifs/Snap-88689-Image Export-06.tif	1	TRUE	925.523
N2_irld39	d1	rep2	tifs	../tifs/Snap-88689-Image Export-06.tif	3	TRUE	896.32
N2_irld39	d1	rep2	tifs	../tifs/Snap-88689-Image Export-06.tif	4	TRUE	835.454
N2_irld39	d1	rep2	tifs	../tifs/Snap-88689-Image Export-06.tif	5	TRUE	829.831
N2_irld39	d1	rep2	tifs	../tifs/Snap-88711-Image Export-28.tif	0	TRUE	910.431
MY_irld39	d1	rep2	tifs	../tifs/Snap-88743-Image Export-27.tif	0	TRUE	879.267
MY_irld39	d1	rep2	tifs	../tifs/Snap-88743-Image Export-27.tif	2	TRUE	837.339
MY_irld39	d1	rep2	tifs	../tifs/Snap-88742-Image Export-26.tif	0	TRUE	769.908
MY_irld39	d1	rep2	tifs	../tifs/Snap-88726-Image Export-10.tif	1	TRUE	898.373
MY_irld39	d1	rep2	tifs	../tifs/Snap-88726-Image Export-10.tif	2	TRUE	946.774
MY_irld39	d1	rep2	tifs	../tifs/Snap-88741-Image Export-25.tif	0	TRUE	867.653
MY_irld39	d1	rep2	tifs	../tifs/Snap-88741-Image Export-25.tif	1	TRUE	869.668
MY_irld39	d1	rep2	tifs	../tifs/Snap-88741-Image Export-25.tif	2	TRUE	857.518
MY_irld39	d1	rep2	tifs	../tifs/Snap-88741-Image Export-25.tif	3	TRUE	857.74
MY_irld39	d1	rep2	tifs	../tifs/Snap-88727-Image Export-11.tif	0	TRUE	752.855
MY_irld39	d1	rep2	tifs	../tifs/Snap-88727-Image Export-11.tif	1	TRUE	869.928
MY_irld39	d1	rep2	tifs	../tifs/Snap-88727-Image Export-11.tif	2	TRUE	850.324
MY_irld39	d1	rep2	tifs	../tifs/Snap-88740-Image Export-24.tif	1	TRUE	898.059
MY_irld39	d1	rep2	tifs	../tifs/Snap-88747-Image Export-31.tif	0	TRUE	894.229
MY_irld39	d1	rep2	tifs	../tifs/Snap-88747-Image Export-31.tif	1	TRUE	802.015
MY_irld39	d1	rep2	tifs	../tifs/Snap-88747-Image Export-31.tif	2	TRUE	902.533
MY_irld39	d1	rep2	tifs	../tifs/Snap-88720-Image Export-04.tif	0	TRUE	847.827
MY_irld39	d1	rep2	tifs	../tifs/Snap-88720-Image Export-04.tif	1	TRUE	851.174
MY_irld39	d1	rep2	tifs	../tifs/Snap-88720-Image Export-04.tif	2	TRUE	913.02
MY_irld39	d1	rep2	tifs	../tifs/Snap-88746-Image Export-30.tif	0	TRUE	883.817
MY_irld39	d1	rep2	tifs	../tifs/Snap-88746-Image Export-30.tif	1	TRUE	846.532
MY_irld39	d1	rep2	tifs	../tifs/Snap-88721-Image Export-05.tif	2	TRUE	913.779
MY_irld39	d1	rep2	tifs	../tifs/Snap-88723-Image Export-07.tif	1	TRUE	856.851
MY_irld39	d1	rep2	tifs	../tifs/Snap-88732-Image Export-16.tif	0	TRUE	772.053
MY_irld39	d1	rep2	tifs	../tifs/Snap-88733-Image Export-17.tif	0	TRUE	876.049
MY_irld39	d1	rep2	tifs	../tifs/Snap-88733-Image Export-17.tif	3	TRUE	801.7
MY_irld39	d1	rep2	tifs	../tifs/Snap-88730-Image Export-14.tif	1	TRUE	891.677
MY_irld39	d1	rep2	tifs	../tifs/Snap-88730-Image Export-14.tif	3	TRUE	922.842
MY_irld39	d1	rep2	tifs	../tifs/Snap-88731-Image Export-15.tif	0	TRUE	890.605
MY_irld39	d1	rep2	tifs	../tifs/Snap-88731-Image Export-15.tif	1	TRUE	894.359
MY_irld39	d1	rep2	tifs	../tifs/Snap-88748-Image Export-32.tif	0	TRUE	884.982
MY_irld39	d1	rep2	tifs	../tifs/Snap-88729-Image Export-13.tif	0	TRUE	882.837
MY_irld39	d1	rep2	tifs	../tifs/Snap-88729-Image Export-13.tif	1	TRUE	837.377
MY_irld39	d1	rep2	tifs	../tifs/Snap-88729-Image Export-13.tif	2	TRUE	906.991
MY_irld39	d1	rep2	tifs	../tifs/Snap-88728-Image Export-12.tif	0	TRUE	892.972
MY_irld39	d1	rep2	tifs	../tifs/Snap-88728-Image Export-12.tif	1	TRUE	859.885
MY_irld39	d1	rep2	tifs	../tifs/Snap-88735-Image Export-19.tif	0	TRUE	855.779
MY_irld39	d1	rep2	tifs	../tifs/Snap-88735-Image Export-19.tif	1	TRUE	802.421
MY_irld39	d1	rep2	tifs	../tifs/Snap-88735-Image Export-19.tif	2	TRUE	853.227
MY_irld39	d1	rep2	tifs	../tifs/Snap-88735-Image Export-19.tif	4	TRUE	903.107
MY_irld39	d1	rep2	tifs	../tifs/Snap-88735-Image Export-19.tif	5	TRUE	899.315
MY_irld39	d1	rep2	tifs	../tifs/Snap-88734-Image Export-18.tif	3	TRUE	816.126
MY_irld39	d1	rep2	tifs	../tifs/Snap-88718-Image Export-02.tif	0	TRUE	945.257
MY_irld39	d1	rep2	tifs	../tifs/Snap-88719-Image Export-03.tif	0	TRUE	849.435
MY_irld39	d1	rep2	tifs	../tifs/Snap-88736-Image Export-20.tif	0	TRUE	888.59
MY_irld39	d1	rep2	tifs	../tifs/Snap-88736-Image Export-20.tif	1	TRUE	808.228
MY_irld39	d1	rep2	tifs	../tifs/Snap-88738-Image Export-22.tif	1	TRUE	882.875
MY_irld39	d1	rep2	tifs	../tifs/Snap-88739-Image Export-23.tif	0	TRUE	841.667
MY_irld39	d1	rep2	tifs	../tifs/Snap-88739-Image Export-23.tif	1	TRUE	891.547
MY_irld39	d1	rep2	tifs	../tifs/Snap-88739-Image Export-23.tif	2	TRUE	863.01
MY_irld39	d1	rep2	tifs	../tifs/Snap-88745-Image Export-29.tif	0	TRUE	871.591
MY_irld39	d1	rep2	tifs	../tifs/Snap-88725-Image Export-09.tif	0	TRUE	892.344
MY_irld39	d1	rep2	tifs	../tifs/Snap-88725-Image Export-09.tif	1	TRUE	918.421
MY_irld39	d1	rep2	tifs	../tifs/Snap-88724-Image Export-08.tif	0	TRUE	866.358
N2	d8	rep1	tifs	../tifs/Snap-88967-Image Export-16.tif	0	TRUE	632.212
N2	d8	rep1	tifs	../tifs/Snap-88967-Image Export-16.tif	1	TRUE	642.569
N2	d8	rep1	tifs	../tifs/Snap-88965-Image Export-14.tif	0	TRUE	725.889
N2	d8	rep1	tifs	../tifs/Snap-88962-Image Export-11.tif	0	TRUE	585.956
N2	d8	rep1	tifs	../tifs/Snap-88962-Image Export-11.tif	1	TRUE	650.652
N2	d8	rep1	tifs	../tifs/Snap-88962-Image Export-11.tif	2	TRUE	651.724
N2	d8	rep1	tifs	../tifs/Snap-88966-Image Export-15.tif	6	TRUE	596.129
N2	d8	rep1	tifs	../tifs/Snap-88966-Image Export-15.tif	9	TRUE	636.854
N2	d8	rep1	tifs	../tifs/Snap-88966-Image Export-15.tif	10	TRUE	494.148
N2	d8	rep1	tifs	../tifs/Snap-88964-Image Export-13.tif	0	TRUE	631.99
N2	d8	rep1	tifs	../tifs/Snap-88969-Image Export-18.tif	0	TRUE	458.471
N2	d8	rep1	tifs	../tifs/Snap-88969-Image Export-18.tif	1	TRUE	590.062
N2	d8	rep1	tifs	../tifs/Snap-88958-Image Export-07.tif	0	TRUE	616.14
N2	d8	rep1	tifs	../tifs/Snap-88973-Image Export-22.tif	0	TRUE	595.241
N2	d8	rep1	tifs	../tifs/Snap-88973-Image Export-22.tif	1	TRUE	700.217
N2	d8	rep1	tifs	../tifs/Snap-88973-Image Export-22.tif	2	TRUE	633.507
N2	d8	rep1	tifs	../tifs/Snap-88955-Image Export-04.tif	0	TRUE	613.588
N2	d8	rep1	tifs	../tifs/Snap-88956-Image Export-05.tif	0	TRUE	568.941
N2	d8	rep1	tifs	../tifs/Snap-88954-Image Export-03.tif	0	TRUE	573.545
N2	d8	rep1	tifs	../tifs/Snap-88954-Image Export-03.tif	1	TRUE	617.786
MY2147	d8	rep1	tifs	../tifs/Snap-88979-Image Export-04.tif	0	TRUE	495.757
MY2147	d8	rep1	tifs	../tifs/Snap-88979-Image Export-04.tif	1	TRUE	477.317
MY2147	d8	rep1	tifs	../tifs/Snap-88992-Image Export-17.tif	0	TRUE	433.872
MY2147	d8	rep1	tifs	../tifs/Snap-88992-Image Export-17.tif	1	TRUE	438.293
MY2147	d8	rep1	tifs	../tifs/Snap-88989-Image Export-14.tif	0	TRUE	482.81
MY2147	d8	rep1	tifs	../tifs/Snap-88990-Image Export-15.tif	0	TRUE	420.297
MY2147	d8	rep1	tifs	../tifs/Snap-88981-Image Export-06.tif	0	TRUE	586.622
MY2147	d8	rep1	tifs	../tifs/Snap-88986-Image Export-11.tif	0	TRUE	578.632
MY2147	d8	rep1	tifs	../tifs/Snap-88986-Image Export-11.tif	1	TRUE	601.714
MY2147	d8	rep1	tifs	../tifs/Snap-88986-Image Export-11.tif	2	TRUE	552.999
MY2147	d8	rep1	tifs	../tifs/Snap-88986-Image Export-11.tif	3	TRUE	578.448
MY2147	d8	rep1	tifs	../tifs/Snap-88987-Image Export-12.tif	0	TRUE	580.999
MY2147	d8	rep1	tifs	../tifs/Snap-88987-Image Export-12.tif	1	TRUE	457.361
MY2147	d8	rep1	tifs	../tifs/Snap-88987-Image Export-12.tif	2	TRUE	588.231
MY2147	d8	rep1	tifs	../tifs/Snap-88984-Image Export-09.tif	0	TRUE	485.936
MY2147	d8	rep1	tifs	../tifs/Snap-88998-Image Export-23.tif	0	TRUE	397.123
MY2147	d8	rep1	tifs	../tifs/Snap-88998-Image Export-23.tif	1	TRUE	566.704
MY2147	d8	rep1	tifs	../tifs/Snap-88998-Image Export-23.tif	2	TRUE	439.495
MY2147	d8	rep1	tifs	../tifs/Snap-89001-Image Export-26.tif	0	TRUE	506.206
MY2147	d8	rep1	tifs	../tifs/Snap-89001-Image Export-26.tif	1	TRUE	462.984
MY2147	d8	rep1	tifs	../tifs/Snap-89001-Image Export-26.tif	2	TRUE	442.399
MY2147	d8	rep1	tifs	../tifs/Snap-88997-Image Export-22.tif	0	TRUE	449.501
MY2147	d8	rep1	tifs	../tifs/Snap-88997-Image Export-22.tif	1	TRUE	599.975
MY2147	d8	rep1	tifs	../tifs/Snap-89002-Image Export-27.tif	1	TRUE	418.152
MY2147	d8	rep1	tifs	../tifs/Snap-89002-Image Export-27.tif	3	TRUE	413.196
MY2147	d8	rep1	tifs	../tifs/Snap-89002-Image Export-27.tif	4	TRUE	598.903
N2_irld39	d8	rep1	tifs	../tifs/Snap-89034-Image Export-31.tif	0	TRUE	674.232
N2_irld39	d8	rep1	tifs	../tifs/Snap-89034-Image Export-31.tif	1	TRUE	698.202
N2_irld39	d8	rep1	tifs	../tifs/Snap-89034-Image Export-31.tif	2	TRUE	714.367
N2_irld39	d8	rep1	tifs	../tifs/Snap-89006-Image Export-03.tif	0	TRUE	643.864
N2_irld39	d8	rep1	tifs	../tifs/Snap-89006-Image Export-03.tif	1	TRUE	657.217
N2_irld39	d8	rep1	tifs	../tifs/Snap-89006-Image Export-03.tif	2	TRUE	652.076
N2_irld39	d8	rep1	tifs	../tifs/Snap-89018-Image Export-15.tif	1	TRUE	656.681
N2_irld39	d8	rep1	tifs	../tifs/Snap-89028-Image Export-25.tif	0	TRUE	672.309
N2_irld39	d8	rep1	tifs	../tifs/Snap-89028-Image Export-25.tif	1	TRUE	669.942
N2_irld39	d8	rep1	tifs	../tifs/Snap-89029-Image Export-26.tif	0	TRUE	684.497
N2_irld39	d8	rep1	tifs	../tifs/Snap-89033-Image Export-30.tif	0	TRUE	668.555
N2_irld39	d8	rep1	tifs	../tifs/Snap-89033-Image Export-30.tif	1	TRUE	658.105
N2_irld39	d8	rep1	tifs	../tifs/Snap-89019-Image Export-16.tif	0	TRUE	625.961
N2_irld39	d8	rep1	tifs	../tifs/Snap-89019-Image Export-16.tif	1	TRUE	654.536
N2_irld39	d8	rep1	tifs	../tifs/Snap-89019-Image Export-16.tif	2	TRUE	577.559
N2_irld39	d8	rep1	tifs	../tifs/Snap-89019-Image Export-16.tif	3	TRUE	677.081
N2_irld39	d8	rep1	tifs	../tifs/Snap-89017-Image Export-14.tif	1	TRUE	615.641
N2_irld39	d8	rep1	tifs	../tifs/Snap-89008-Image Export-05.tif	0	TRUE	609.666
N2_irld39	d8	rep1	tifs	../tifs/Snap-89027-Image Export-24.tif	0	TRUE	671.55
N2_irld39	d8	rep1	tifs	../tifs/Snap-89027-Image Export-24.tif	2	TRUE	649.265
N2_irld39	d8	rep1	tifs	../tifs/Snap-89009-Image Export-06.tif	0	TRUE	623.816
N2_irld39	d8	rep1	tifs	../tifs/Snap-89009-Image Export-06.tif	1	TRUE	669.85
N2_irld39	d8	rep1	tifs	../tifs/Snap-89013-Image Export-10.tif	1	TRUE	608.187
N2_irld39	d8	rep1	tifs	../tifs/Snap-89013-Image Export-10.tif	2	TRUE	543.714
N2_irld39	d8	rep1	tifs	../tifs/Snap-89013-Image Export-10.tif	3	TRUE	610.777
N2_irld39	d8	rep1	tifs	../tifs/Snap-89010-Image Export-07.tif	0	TRUE	709.724
N2_irld39	d8	rep1	tifs	../tifs/Snap-89023-Image Export-20.tif	0	TRUE	644.622
N2_irld39	d8	rep1	tifs	../tifs/Snap-89023-Image Export-20.tif	1	TRUE	641.903
N2_irld39	d8	rep1	tifs	../tifs/Snap-89023-Image Export-20.tif	2	TRUE	635.154
N2_irld39	d8	rep1	tifs	../tifs/Snap-89024-Image Export-21.tif	0	TRUE	698.831
N2_irld39	d8	rep1	tifs	../tifs/Snap-89024-Image Export-21.tif	1	TRUE	632.748
N2_irld39	d8	rep1	tifs	../tifs/Snap-89024-Image Export-21.tif	3	TRUE	687.753
N2_irld39	d8	rep1	tifs	../tifs/Snap-89024-Image Export-21.tif	4	TRUE	649.043
N2_irld39	d8	rep1	tifs	../tifs/Snap-89016-Image Export-13.tif	0	TRUE	614.753
N2_irld39	d8	rep1	tifs	../tifs/Snap-89016-Image Export-13.tif	1	TRUE	622.299
N2_irld39	d8	rep1	tifs	../tifs/Snap-89016-Image Export-13.tif	2	TRUE	642.699
N2_irld39	d8	rep1	tifs	../tifs/Snap-89022-Image Export-19.tif	0	TRUE	675.434
N2_irld39	d8	rep1	tifs	../tifs/Snap-89022-Image Export-19.tif	1	TRUE	656.052
N2_irld39	d8	rep1	tifs	../tifs/Snap-89026-Image Export-23.tif	0	TRUE	673.604
N2_irld39	d8	rep1	tifs	../tifs/Snap-89026-Image Export-23.tif	1	TRUE	609.482
N2_irld39	d8	rep1	tifs	../tifs/Snap-89026-Image Export-23.tif	2	TRUE	658.328
N2_irld39	d8	rep1	tifs	../tifs/Snap-89026-Image Export-23.tif	3	TRUE	691.193
N2_irld39	d8	rep1	tifs	../tifs/Snap-89014-Image Export-11.tif	0	TRUE	581.443
N2_irld39	d8	rep1	tifs	../tifs/Snap-89014-Image Export-11.tif	1	TRUE	616.047
N2_irld39	d8	rep1	tifs	../tifs/Snap-89014-Image Export-11.tif	2	TRUE	502.766
N2_irld39	d8	rep1	tifs	../tifs/Snap-89014-Image Export-11.tif	3	TRUE	536.39
N2_irld39	d8	rep1	tifs	../tifs/Snap-89014-Image Export-11.tif	4	TRUE	441.955
N2_irld39	d8	rep1	tifs	../tifs/Snap-89014-Image Export-11.tif	5	TRUE	574.97
N2_irld39	d8	rep1	tifs	../tifs/Snap-89014-Image Export-11.tif	6	TRUE	620.154
N2_irld39	d8	rep1	tifs	../tifs/Snap-89015-Image Export-12.tif	0	TRUE	566.98
N2_irld39	d8	rep1	tifs	../tifs/Snap-89015-Image Export-12.tif	1	TRUE	574.434
N2_irld39	d8	rep1	tifs	../tifs/Snap-89021-Image Export-18.tif	0	TRUE	639.888
N2_irld39	d8	rep1	tifs	../tifs/Snap-89021-Image Export-18.tif	1	TRUE	561.303
N2_irld39	d8	rep1	tifs	../tifs/Snap-89021-Image Export-18.tif	2	TRUE	603.767
N2_irld39	d8	rep1	tifs	../tifs/Snap-89025-Image Export-22.tif	0	TRUE	669.942
N2_irld39	d8	rep1	tifs	../tifs/Snap-89025-Image Export-22.tif	2	TRUE	700.348
N2_irld39	d8	rep1	tifs	../tifs/Snap-89025-Image Export-22.tif	4	TRUE	692.579
N2_irld39	d8	rep1	tifs	../tifs/Snap-89025-Image Export-22.tif	5	TRUE	632.564
N2_irld39	d8	rep1	tifs	../tifs/Snap-89032-Image Export-29.tif	0	TRUE	636.54
N2_irld39	d8	rep1	tifs	../tifs/Snap-89031-Image Export-28.tif	0	TRUE	643.014
MY_irld39	d8	rep1	tifs	../tifs/Snap-89083-Image Export-21.tif	0	TRUE	473.877
MY_irld39	d8	rep1	tifs	../tifs/Snap-89083-Image Export-21.tif	2	TRUE	591.487
MY_irld39	d8	rep1	tifs	../tifs/Snap-89070-Image Export-08.tif	0	TRUE	484.771
MY_irld39	d8	rep1	tifs	../tifs/Snap-89070-Image Export-08.tif	1	TRUE	466.201
MY_irld39	d8	rep1	tifs	../tifs/Snap-89071-Image Export-09.tif	0	TRUE	465.129
MY_irld39	d8	rep1	tifs	../tifs/Snap-89071-Image Export-09.tif	1	TRUE	494.776
MY_irld39	d8	rep1	tifs	../tifs/Snap-89071-Image Export-09.tif	2	TRUE	558.936
MY_irld39	d8	rep1	tifs	../tifs/Snap-89071-Image Export-09.tif	3	TRUE	482.718
MY_irld39	d8	rep1	tifs	../tifs/Snap-89071-Image Export-09.tif	4	TRUE	469.105
MY_irld39	d8	rep1	tifs	../tifs/Snap-89085-Image Export-23.tif	0	TRUE	623.057
MY_irld39	d8	rep1	tifs	../tifs/Snap-89085-Image Export-23.tif	1	TRUE	580.593
MY_irld39	d8	rep1	tifs	../tifs/Snap-89084-Image Export-22.tif	0	TRUE	522.056
MY_irld39	d8	rep1	tifs	../tifs/Snap-89084-Image Export-22.tif	1	TRUE	528.4
MY_irld39	d8	rep1	tifs	../tifs/Snap-89084-Image Export-22.tif	3	TRUE	567.646
MY_irld39	d8	rep1	tifs	../tifs/Snap-89084-Image Export-22.tif	4	TRUE	448.872
MY_irld39	d8	rep1	tifs	../tifs/Snap-89084-Image Export-22.tif	5	TRUE	584.791
MY_irld39	d8	rep1	tifs	../tifs/Snap-89080-Image Export-18.tif	0	TRUE	466.331
MY_irld39	d8	rep1	tifs	../tifs/Snap-89080-Image Export-18.tif	1	TRUE	523.129
MY_irld39	d8	rep1	tifs	../tifs/Snap-89080-Image Export-18.tif	2	TRUE	423.423
MY_irld39	d8	rep1	tifs	../tifs/Snap-89080-Image Export-18.tif	3	TRUE	558.583
MY_irld39	d8	rep1	tifs	../tifs/Snap-89081-Image Export-19.tif	0	TRUE	505.762
MY_irld39	d8	rep1	tifs	../tifs/Snap-89081-Image Export-19.tif	1	TRUE	564.076
MY_irld39	d8	rep1	tifs	../tifs/Snap-89074-Image Export-12.tif	2	TRUE	460.394
MY_irld39	d8	rep1	tifs	../tifs/Snap-89074-Image Export-12.tif	3	TRUE	430.969
MY_irld39	d8	rep1	tifs	../tifs/Snap-89075-Image Export-13.tif	1	TRUE	582.646
MY_irld39	d8	rep1	tifs	../tifs/Snap-89068-Image Export-06.tif	0	TRUE	480.129
MY_irld39	d8	rep1	tifs	../tifs/Snap-89068-Image Export-06.tif	1	TRUE	614.347
MY_irld39	d8	rep1	tifs	../tifs/Snap-89072-Image Export-10.tif	1	TRUE	469.105
MY_irld39	d8	rep1	tifs	../tifs/Snap-89072-Image Export-10.tif	2	TRUE	391.278
MY_irld39	d8	rep1	tifs	../tifs/Snap-89069-Image Export-07.tif	1	TRUE	524.868
MY_irld39	d8	rep1	tifs	../tifs/Snap-89069-Image Export-07.tif	2	TRUE	596.535
MY_irld39	d8	rep1	tifs	../tifs/Snap-89077-Image Export-15.tif	0	TRUE	560.322
MY_irld39	d8	rep1	tifs	../tifs/Snap-89077-Image Export-15.tif	1	TRUE	559.564
MY_irld39	d8	rep1	tifs	../tifs/Snap-89077-Image Export-15.tif	2	TRUE	261.518
MY_irld39	d8	rep1	tifs	../tifs/Snap-89076-Image Export-14.tif	0	TRUE	545.323
MY_irld39	d8	rep1	tifs	../tifs/Snap-89076-Image Export-14.tif	1	TRUE	410.384
MY_irld39	d8	rep1	tifs	../tifs/Snap-89076-Image Export-14.tif	2	TRUE	470.844
MY_irld39	d8	rep1	tifs	../tifs/Snap-89063-Image Export-01.tif	1	TRUE	540.366
MY_irld39	d8	rep1	tifs	../tifs/Snap-89063-Image Export-01.tif	2	TRUE	589.434
MY_irld39	d8	rep1	tifs	../tifs/Snap-89063-Image Export-01.tif	3	TRUE	567.96
MY_irld39	d8	rep1	tifs	../tifs/Snap-89078-Image Export-16.tif	0	TRUE	560.767
MY_irld39	d8	rep1	tifs	../tifs/Snap-89079-Image Export-17.tif	0	TRUE	665.835
MY_irld39	d8	rep1	tifs	../tifs/Snap-89067-Image Export-05.tif	0	TRUE	681.28
MY_irld39	d8	rep1	tifs	../tifs/Snap-89067-Image Export-05.tif	1	TRUE	540.274
MY_irld39	d8	rep1	tifs	../tifs/Snap-89067-Image Export-05.tif	2	TRUE	567.554
MY_irld39	d8	rep1	tifs	../tifs/Snap-89067-Image Export-05.tif	4	TRUE	536.612
MY_irld39	d8	rep1	tifs	../tifs/Snap-89066-Image Export-04.tif	1	TRUE	528.974
MY_irld39	d8	rep1	tifs	../tifs/Snap-89066-Image Export-04.tif	2	TRUE	536.076
MY_irld39	d8	rep1	tifs	../tifs/Snap-89066-Image Export-04.tif	3	TRUE	556.661
MY_irld39	d8	rep1	tifs	../tifs/Snap-89066-Image Export-04.tif	4	TRUE	630.825
MY_irld39	d8	rep1	tifs	../tifs/Snap-89066-Image Export-04.tif	6	TRUE	596.443
MY_irld39	d8	rep1	tifs	../tifs/Snap-89066-Image Export-04.tif	8	TRUE	547.506
MY_irld39	d8	rep1	tifs	../tifs/Snap-89064-Image Export-02.tif	0	TRUE	562.376
MY_irld39	d8	rep1	tifs	../tifs/Snap-89064-Image Export-02.tif	1	TRUE	563.67
MY_irld39	d8	rep1	tifs	../tifs/Snap-89064-Image Export-02.tif	2	TRUE	607.873
MY_irld39	d8	rep1	tifs	../tifs/Snap-89064-Image Export-02.tif	3	TRUE	558.047
MY_irld39	d8	rep1	tifs	../tifs/Snap-89064-Image Export-02.tif	4	TRUE	619.265
MY_irld39	d8	rep1	tifs	../tifs/Snap-89065-Image Export-03.tif	3	TRUE	546.655
MY_irld39	d8	rep1	tifs	../tifs/Snap-89065-Image Export-03.tif	5	TRUE	570.458
MY_irld39	d8	rep1	tifs	../tifs/Snap-89065-Image Export-03.tif	6	TRUE	501.25
N2_irld52	d8	rep1	tifs	../tifs/Snap-89111-Image Export-26.tif	0	TRUE	459.858
N2_irld52	d8	rep1	tifs	../tifs/Snap-89111-Image Export-26.tif	1	TRUE	463.298
N2_irld52	d8	rep1	tifs	../tifs/Snap-89111-Image Export-26.tif	2	TRUE	611.719
N2_irld52	d8	rep1	tifs	../tifs/Snap-89111-Image Export-26.tif	3	TRUE	633.599
N2_irld52	d8	rep1	tifs	../tifs/Snap-89111-Image Export-26.tif	4	TRUE	411.457
N2_irld52	d8	rep1	tifs	../tifs/Snap-89111-Image Export-26.tif	5	TRUE	542.641
N2_irld52	d8	rep1	tifs	../tifs/Snap-89109-Image Export-24.tif	1	TRUE	637.705
N2_irld52	d8	rep1	tifs	../tifs/Snap-89112-Image Export-27.tif	0	TRUE	594.482
N2_irld52	d8	rep1	tifs	../tifs/Snap-89112-Image Export-27.tif	3	TRUE	625.647
N2_irld52	d8	rep1	tifs	../tifs/Snap-89112-Image Export-27.tif	4	TRUE	648.062
N2_irld52	d8	rep1	tifs	../tifs/Snap-89110-Image Export-25.tif	0	TRUE	642.791
N2_irld52	d8	rep1	tifs	../tifs/Snap-89110-Image Export-25.tif	1	TRUE	498.216
N2_irld52	d8	rep1	tifs	../tifs/Snap-89110-Image Export-25.tif	2	TRUE	573.361
N2_irld52	d8	rep1	tifs	../tifs/Snap-89116-Image Export-31.tif	0	TRUE	555.144
N2_irld52	d8	rep1	tifs	../tifs/Snap-89116-Image Export-31.tif	1	TRUE	633.821
N2_irld52	d8	rep1	tifs	../tifs/Snap-89108-Image Export-23.tif	0	TRUE	633.507
N2_irld52	d8	rep1	tifs	../tifs/Snap-89115-Image Export-30.tif	0	TRUE	601.622
N2_irld52	d8	rep1	tifs	../tifs/Snap-89117-Image Export-32.tif	0	TRUE	635.468
N2_irld52	d8	rep1	tifs	../tifs/Snap-89117-Image Export-32.tif	1	TRUE	668.111
N2_irld52	d8	rep1	tifs	../tifs/Snap-89103-Image Export-18.tif	0	TRUE	593.632
N2_irld52	d8	rep1	tifs	../tifs/Snap-89103-Image Export-18.tif	1	TRUE	614.347
N2_irld52	d8	rep1	tifs	../tifs/Snap-89105-Image Export-20.tif	0	TRUE	634.487
N2_irld52	d8	rep1	tifs	../tifs/Snap-89099-Image Export-14.tif	0	TRUE	580.057
N2_irld52	d8	rep1	tifs	../tifs/Snap-89086-Image Export-01.tif	0	TRUE	644.845
N2_irld52	d8	rep1	tifs	../tifs/Snap-89086-Image Export-01.tif	1	TRUE	603.415
N2_irld52	d8	rep1	tifs	../tifs/Snap-89087-Image Export-02.tif	0	TRUE	627.477
N2_irld52	d8	rep1	tifs	../tifs/Snap-89087-Image Export-02.tif	1	TRUE	471.38
N2_irld52	d8	rep1	tifs	../tifs/Snap-89098-Image Export-13.tif	1	TRUE	646.99
N2_irld52	d8	rep1	tifs	../tifs/Snap-89098-Image Export-13.tif	4	TRUE	595.999
N2_irld52	d8	rep1	tifs	../tifs/Snap-89098-Image Export-13.tif	5	TRUE	601.27
N2_irld52	d8	rep1	tifs	../tifs/Snap-89100-Image Export-15.tif	0	TRUE	665.115
N2_irld52	d8	rep1	tifs	../tifs/Snap-89100-Image Export-15.tif	2	TRUE	571.308
N2_irld52	d8	rep1	tifs	../tifs/Snap-89100-Image Export-15.tif	7	TRUE	587.695
N2_irld52	d8	rep1	tifs	../tifs/Snap-89096-Image Export-11.tif	1	TRUE	563.134
N2_irld52	d8	rep1	tifs	../tifs/Snap-89088-Image Export-03.tif	0	TRUE	474.414
N2_irld52	d8	rep1	tifs	../tifs/Snap-89088-Image Export-03.tif	1	TRUE	622.613
N2_irld52	d8	rep1	tifs	../tifs/Snap-89088-Image Export-03.tif	2	TRUE	511.569
N2_irld52	d8	rep1	tifs	../tifs/Snap-89095-Image Export-10.tif	0	TRUE	633.192
N2_irld52	d8	rep1	tifs	../tifs/Snap-89095-Image Export-10.tif	1	TRUE	466.423
N2_irld52	d8	rep1	tifs	../tifs/Snap-89092-Image Export-07.tif	0	TRUE	671.903
N2_irld52	d8	rep1	tifs	../tifs/Snap-89092-Image Export-07.tif	1	TRUE	566.26
N2_irld52	d8	rep1	tifs	../tifs/Snap-89092-Image Export-07.tif	2	TRUE	657.439
N2_irld52	d8	rep1	tifs	../tifs/Snap-89092-Image Export-07.tif	3	TRUE	625.961
N2_irld52	d8	rep1	tifs	../tifs/Snap-89092-Image Export-07.tif	4	TRUE	549.743
N2_irld52	d8	rep1	tifs	../tifs/Snap-89113-Image Export-28.tif	0	TRUE	477.983
N2_irld52	d8	rep1	tifs	../tifs/Snap-89113-Image Export-28.tif	1	TRUE	585.327
N2_irld52	d8	rep1	tifs	../tifs/Snap-89113-Image Export-28.tif	2	TRUE	575.506
N2_irld52	d8	rep1	tifs	../tifs/Snap-89113-Image Export-28.tif	3	TRUE	563.356
N2_irld52	d8	rep1	tifs	../tifs/Snap-89113-Image Export-28.tif	4	TRUE	546.969
N2_irld52	d8	rep1	tifs	../tifs/Snap-89113-Image Export-28.tif	5	TRUE	676.415
N2_irld52	d8	rep1	tifs	../tifs/Snap-89090-Image Export-05.tif	0	TRUE	609.482
N2_irld52	d8	rep1	tifs	../tifs/Snap-89090-Image Export-05.tif	1	TRUE	637.391
MY_irld52	d8	rep1	tifs	../tifs/Snap-89049-Image Export-13.tif	0	TRUE	589.119
MY_irld52	d8	rep1	tifs	../tifs/Snap-89049-Image Export-13.tif	1	TRUE	585.105
MY_irld52	d8	rep1	tifs	../tifs/Snap-89049-Image Export-13.tif	2	TRUE	583.274
MY_irld52	d8	rep1	tifs	../tifs/Snap-89049-Image Export-13.tif	3	TRUE	662.396
MY_irld52	d8	rep1	tifs	../tifs/Snap-89049-Image Export-13.tif	4	TRUE	553.941
MY_irld52	d8	rep1	tifs	../tifs/Snap-89048-Image Export-12.tif	0	TRUE	619.932
MY_irld52	d8	rep1	tifs	../tifs/Snap-89048-Image Export-12.tif	1	TRUE	661.101
MY_irld52	d8	rep1	tifs	../tifs/Snap-89048-Image Export-12.tif	2	TRUE	641.941
MY_irld52	d8	rep1	tifs	../tifs/Snap-89060-Image Export-24.tif	0	TRUE	525.182
MY_irld52	d8	rep1	tifs	../tifs/Snap-89050-Image Export-14.tif	0	TRUE	555.68
MY_irld52	d8	rep1	tifs	../tifs/Snap-89050-Image Export-14.tif	1	TRUE	611.979
MY_irld52	d8	rep1	tifs	../tifs/Snap-89050-Image Export-14.tif	2	TRUE	607.743
MY_irld52	d8	rep1	tifs	../tifs/Snap-89050-Image Export-14.tif	4	TRUE	557.197
MY_irld52	d8	rep1	tifs	../tifs/Snap-89062-Image Export-26.tif	0	TRUE	599.033
MY_irld52	d8	rep1	tifs	../tifs/Snap-89051-Image Export-15.tif	0	TRUE	549.743
MY_irld52	d8	rep1	tifs	../tifs/Snap-89051-Image Export-15.tif	1	TRUE	634.709
MY_irld52	d8	rep1	tifs	../tifs/Snap-89051-Image Export-15.tif	2	TRUE	603.545
MY_irld52	d8	rep1	tifs	../tifs/Snap-89040-Image Export-04.tif	1	TRUE	429.896
MY_irld52	d8	rep1	tifs	../tifs/Snap-89040-Image Export-04.tif	2	TRUE	585.55
MY_irld52	d8	rep1	tifs	../tifs/Snap-89040-Image Export-04.tif	3	TRUE	615.825
MY_irld52	d8	rep1	tifs	../tifs/Snap-89041-Image Export-05.tif	0	TRUE	594.39
MY_irld52	d8	rep1	tifs	../tifs/Snap-89043-Image Export-07.tif	1	TRUE	589.434
MY_irld52	d8	rep1	tifs	../tifs/Snap-89043-Image Export-07.tif	2	TRUE	576.709
MY_irld52	d8	rep1	tifs	../tifs/Snap-89047-Image Export-11.tif	0	TRUE	586.622
MY_irld52	d8	rep1	tifs	../tifs/Snap-89039-Image Export-03.tif	0	TRUE	581.129
MY_irld52	d8	rep1	tifs	../tifs/Snap-89044-Image Export-08.tif	2	TRUE	571.53
MY_irld52	d8	rep1	tifs	../tifs/Snap-89044-Image Export-08.tif	3	TRUE	484.863
MY_irld52	d8	rep1	tifs	../tifs/Snap-89058-Image Export-22.tif	0	TRUE	463.612
MY_irld52	d8	rep1	tifs	../tifs/Snap-89058-Image Export-22.tif	1	TRUE	491.873
MY_irld52	d8	rep1	tifs	../tifs/Snap-89058-Image Export-22.tif	2	TRUE	581.535
MY_irld52	d8	rep1	tifs	../tifs/Snap-89059-Image Export-23.tif	0	TRUE	528.714
MY_irld52	d8	rep1	tifs	../tifs/Snap-89059-Image Export-23.tif	2	TRUE	557.863
MY_irld52	d8	rep1	tifs	../tifs/Snap-89059-Image Export-23.tif	3	TRUE	467.94
MY_irld52	d8	rep1	tifs	../tifs/Snap-89057-Image Export-21.tif	0	TRUE	572.197
MY_irld52	d8	rep1	tifs	../tifs/Snap-89057-Image Export-21.tif	1	TRUE	511.921
MY_irld52	d8	rep1	tifs	../tifs/Snap-89055-Image Export-19.tif	0	TRUE	542.105
MY_irld52	d8	rep1	tifs	../tifs/Snap-89055-Image Export-19.tif	1	TRUE	629.623
MY_irld52	d8	rep1	tifs	../tifs/Snap-89054-Image Export-18.tif	0	TRUE	411.143
MY_irld52	d8	rep1	tifs	../tifs/Snap-89054-Image Export-18.tif	1	TRUE	595.999
MY_irld39	d1	rep3	tifs	../tifs/Snap-91219-Image Export-25.tif	0	TRUE	773.624
MY_irld39	d1	rep3	tifs	../tifs/Snap-91219-Image Export-25.tif	1	TRUE	722.005
MY_irld39	d1	rep3	tifs	../tifs/Snap-91218-Image Export-24.tif	0	TRUE	762.898
MY_irld39	d1	rep3	tifs	../tifs/Snap-91218-Image Export-24.tif	1	TRUE	749.101
MY_irld39	d1	rep3	tifs	../tifs/Snap-91218-Image Export-24.tif	2	TRUE	747.768
MY_irld39	d1	rep3	tifs	../tifs/Snap-91202-Image Export-08.tif	0	TRUE	750.802
MY_irld39	d1	rep3	tifs	../tifs/Snap-91222-Image Export-28.tif	0	TRUE	778.71
MY_irld39	d1	rep3	tifs	../tifs/Snap-91217-Image Export-23.tif	0	TRUE	679.763
MY_irld39	d1	rep3	tifs	../tifs/Snap-91217-Image Export-23.tif	1	TRUE	774.734
MY_irld39	d1	rep3	tifs	../tifs/Snap-91217-Image Export-23.tif	2	TRUE	708.43
MY_irld39	d1	rep3	tifs	../tifs/Snap-91216-Image Export-22.tif	0	TRUE	746.474
MY_irld39	d1	rep3	tifs	../tifs/Snap-91216-Image Export-22.tif	1	TRUE	747.546
MY_irld39	d1	rep3	tifs	../tifs/Snap-91215-Image Export-21.tif	1	TRUE	742.85
MY_irld39	d1	rep3	tifs	../tifs/Snap-91215-Image Export-21.tif	2	TRUE	739.816
MY_irld39	d1	rep3	tifs	../tifs/Snap-91214-Image Export-20.tif	1	TRUE	827.112
MY_irld39	d1	rep3	tifs	../tifs/Snap-91214-Image Export-20.tif	2	TRUE	760.087
MY_irld39	d1	rep3	tifs	../tifs/Snap-91214-Image Export-20.tif	3	TRUE	696.463
MY_irld39	d1	rep3	tifs	../tifs/Snap-91214-Image Export-20.tif	6	TRUE	711.961
MY_irld39	d1	rep3	tifs	../tifs/Snap-91226-Image Export-32.tif	0	TRUE	789.382
MY_irld39	d1	rep3	tifs	../tifs/Snap-91226-Image Export-32.tif	3	TRUE	777.638
MY_irld39	d1	rep3	tifs	../tifs/Snap-91226-Image Export-32.tif	4	TRUE	764.599
MY_irld39	d1	rep3	tifs	../tifs/Snap-91226-Image Export-32.tif	5	TRUE	740.13
MY_irld39	d1	rep3	tifs	../tifs/Snap-91195-Image Export-01.tif	0	TRUE	811.299
MY_irld39	d1	rep3	tifs	../tifs/Snap-91227-Image Export-33.tif	0	TRUE	770.85
MY_irld39	d1	rep3	tifs	../tifs/Snap-91224-Image Export-30.tif	0	TRUE	769.87
MY_irld39	d1	rep3	tifs	../tifs/Snap-91224-Image Export-30.tif	2	TRUE	762.86
MY_irld39	d1	rep3	tifs	../tifs/Snap-91197-Image Export-03.tif	0	TRUE	683.961
MY_irld39	d1	rep3	tifs	../tifs/Snap-91197-Image Export-03.tif	3	TRUE	712.628
MY_irld39	d1	rep3	tifs	../tifs/Snap-91208-Image Export-14.tif	0	TRUE	786.662
MY_irld39	d1	rep3	tifs	../tifs/Snap-91208-Image Export-14.tif	1	TRUE	775.585
MY_irld39	d1	rep3	tifs	../tifs/Snap-91208-Image Export-14.tif	2	TRUE	732.806
MY_irld39	d1	rep3	tifs	../tifs/Snap-91208-Image Export-14.tif	3	TRUE	779.561
MY_irld39	d1	rep3	tifs	../tifs/Snap-91208-Image Export-14.tif	4	TRUE	748.212
MY_irld39	d1	rep3	tifs	../tifs/Snap-91209-Image Export-15.tif	0	TRUE	769.962
MY_irld39	d1	rep3	tifs	../tifs/Snap-91209-Image Export-15.tif	1	TRUE	814.701
MY_irld39	d1	rep3	tifs	../tifs/Snap-91209-Image Export-15.tif	3	TRUE	782.947
MY_irld39	d1	rep3	tifs	../tifs/Snap-91211-Image Export-17.tif	1	TRUE	755.981
MY_irld39	d1	rep3	tifs	../tifs/Snap-91211-Image Export-17.tif	2	TRUE	729.773
MY_irld39	d1	rep3	tifs	../tifs/Snap-91220-Image Export-26.tif	0	TRUE	839.392
MY_irld39	d1	rep3	tifs	../tifs/Snap-91220-Image Export-26.tif	1	TRUE	779.469
MY_irld39	d1	rep3	tifs	../tifs/Snap-91221-Image Export-27.tif	0	TRUE	788.125
MY_irld39	d1	rep3	tifs	../tifs/Snap-91221-Image Export-27.tif	2	TRUE	777.01
MY_irld39	d1	rep3	tifs	../tifs/Snap-91221-Image Export-27.tif	3	TRUE	767.503
MY_irld39	d1	rep3	tifs	../tifs/Snap-91221-Image Export-27.tif	5	TRUE	763.619
MY_irld39	d1	rep3	tifs	../tifs/Snap-91221-Image Export-27.tif	6	TRUE	745.087
MY_irld39	d1	rep3	tifs	../tifs/Snap-91221-Image Export-27.tif	8	TRUE	758.662
MY_irld39	d1	rep3	tifs	../tifs/Snap-91198-Image Export-04.tif	1	TRUE	762.232
MY_irld39	d1	rep3	tifs	../tifs/Snap-91200-Image Export-06.tif	0	TRUE	784.962
MY_irld39	d1	rep3	tifs	../tifs/Snap-91207-Image Export-13.tif	0	TRUE	765.135
MY_irld39	d1	rep3	tifs	../tifs/Snap-91207-Image Export-13.tif	1	TRUE	778.044
MY_irld39	d1	rep3	tifs	../tifs/Snap-91204-Image Export-10.tif	0	TRUE	772.589
MY_irld39	d1	rep3	tifs	../tifs/Snap-91205-Image Export-11.tif	0	TRUE	781.208
N2_irld39	d1	rep3	tifs	../tifs/Snap-91187-Image Export-20.tif	0	TRUE	793.266
N2_irld39	d1	rep3	tifs	../tifs/Snap-91187-Image Export-20.tif	3	TRUE	819.029
N2_irld39	d1	rep3	tifs	../tifs/Snap-91176-Image Export-09.tif	0	TRUE	873.682
N2_irld39	d1	rep3	tifs	../tifs/Snap-91176-Image Export-09.tif	1	TRUE	829.793
N2_irld39	d1	rep3	tifs	../tifs/Snap-91185-Image Export-18.tif	0	TRUE	822.507
N2_irld39	d1	rep3	tifs	../tifs/Snap-91185-Image Export-18.tif	1	TRUE	810.319
N2_irld39	d1	rep3	tifs	../tifs/Snap-91185-Image Export-18.tif	2	TRUE	769.426
N2_irld39	d1	rep3	tifs	../tifs/Snap-91186-Image Export-19.tif	0	TRUE	791.971
N2_irld39	d1	rep3	tifs	../tifs/Snap-91186-Image Export-19.tif	1	TRUE	820.546
N2_irld39	d1	rep3	tifs	../tifs/Snap-91186-Image Export-19.tif	2	TRUE	799.203
N2_irld39	d1	rep3	tifs	../tifs/Snap-91192-Image Export-25.tif	0	TRUE	741.517
N2_irld39	d1	rep3	tifs	../tifs/Snap-91192-Image Export-25.tif	1	TRUE	814.831
N2_irld39	d1	rep3	tifs	../tifs/Snap-91193-Image Export-26.tif	0	TRUE	824.522
N2_irld39	d1	rep3	tifs	../tifs/Snap-91193-Image Export-26.tif	1	TRUE	783.001
N2_irld39	d1	rep3	tifs	../tifs/Snap-91193-Image Export-26.tif	2	TRUE	835.102
N2_irld39	d1	rep3	tifs	../tifs/Snap-91194-Image Export-27.tif	0	TRUE	773.532
N2_irld39	d1	rep3	tifs	../tifs/Snap-91188-Image Export-21.tif	0	TRUE	776.565
N2_irld39	d1	rep3	tifs	../tifs/Snap-91188-Image Export-21.tif	1	TRUE	804.344
N2_irld39	d1	rep3	tifs	../tifs/Snap-91188-Image Export-21.tif	2	TRUE	849.972
N2_irld39	d1	rep3	tifs	../tifs/Snap-91190-Image Export-23.tif	1	TRUE	797.594
N2_irld39	d1	rep3	tifs	../tifs/Snap-91190-Image Export-23.tif	2	TRUE	812.112
N2_irld39	d1	rep3	tifs	../tifs/Snap-91190-Image Export-23.tif	3	TRUE	792.416
N2_irld39	d1	rep3	tifs	../tifs/Snap-91190-Image Export-23.tif	4	TRUE	758.956
N2_irld39	d1	rep3	tifs	../tifs/Snap-91190-Image Export-23.tif	5	TRUE	729.957
N2_irld39	d1	rep3	tifs	../tifs/Snap-91189-Image Export-22.tif	0	TRUE	856.315
N2_irld39	d1	rep3	tifs	../tifs/Snap-91189-Image Export-22.tif	1	TRUE	826.039
N2_irld39	d1	rep3	tifs	../tifs/Snap-91178-Image Export-11.tif	0	TRUE	823.58
N2_irld39	d1	rep3	tifs	../tifs/Snap-91179-Image Export-12.tif	0	TRUE	863.769
N2_irld39	d1	rep3	tifs	../tifs/Snap-91179-Image Export-12.tif	1	TRUE	841.575
N2_irld39	d1	rep3	tifs	../tifs/Snap-91184-Image Export-17.tif	0	TRUE	797.502
N2_irld39	d1	rep3	tifs	../tifs/Snap-91184-Image Export-17.tif	1	TRUE	822.821
N2_irld39	d1	rep3	tifs	../tifs/Snap-91172-Image Export-05.tif	0	TRUE	836.266
N2_irld39	d1	rep3	tifs	../tifs/Snap-91172-Image Export-05.tif	1	TRUE	787.015
N2_irld39	d1	rep3	tifs	../tifs/Snap-91180-Image Export-13.tif	0	TRUE	816.44
N2_irld39	d1	rep3	tifs	../tifs/Snap-91180-Image Export-13.tif	1	TRUE	793.266
N2_irld39	d1	rep3	tifs	../tifs/Snap-91180-Image Export-13.tif	3	TRUE	761.381
N2_irld39	d1	rep3	tifs	../tifs/Snap-91180-Image Export-13.tif	4	TRUE	843.72
N2_irld39	d1	rep3	tifs	../tifs/Snap-91171-Image Export-04.tif	0	TRUE	775.807
N2_irld39	d1	rep3	tifs	../tifs/Snap-91171-Image Export-04.tif	1	TRUE	832.735
N2_irld39	d1	rep3	tifs	../tifs/Snap-91171-Image Export-04.tif	2	TRUE	852.339
N2_irld39	d1	rep3	tifs	../tifs/Snap-91173-Image Export-06.tif	1	TRUE	815.682
N2_irld39	d1	rep3	tifs	../tifs/Snap-91174-Image Export-07.tif	1	TRUE	821.305
N2_irld39	d1	rep3	tifs	../tifs/Snap-91174-Image Export-07.tif	2	TRUE	823.802
N2_irld39	d1	rep3	tifs	../tifs/Snap-91174-Image Export-07.tif	4	TRUE	764.155
N2_irld39	d1	rep3	tifs	../tifs/Snap-91174-Image Export-07.tif	5	TRUE	828.72
N2_irld39	d1	rep3	tifs	../tifs/Snap-91177-Image Export-10.tif	0	TRUE	814.831
N2_irld39	d1	rep3	tifs	../tifs/Snap-91170-Image Export-03.tif	1	TRUE	817.551
N2_irld39	d1	rep3	tifs	../tifs/Snap-91170-Image Export-03.tif	2	TRUE	816.088
N2_irld39	d1	rep3	tifs	../tifs/Snap-91170-Image Export-03.tif	3	TRUE	816.57
N2_irld39	d1	rep3	tifs	../tifs/Snap-91181-Image Export-14.tif	1	TRUE	802.459
MY_irld52	d1	rep3	tifs	../tifs/Snap-91263-Image Export-02.tif	0	TRUE	791.343
MY_irld52	d1	rep3	tifs	../tifs/Snap-91265-Image Export-04.tif	0	TRUE	792.952
MY_irld52	d1	rep3	tifs	../tifs/Snap-91265-Image Export-04.tif	1	TRUE	804.122
MY_irld52	d1	rep3	tifs	../tifs/Snap-91265-Image Export-04.tif	2	TRUE	772.589
MY_irld52	d1	rep3	tifs	../tifs/Snap-91289-Image Export-28.tif	0	TRUE	792.416
MY_irld52	d1	rep3	tifs	../tifs/Snap-91289-Image Export-28.tif	1	TRUE	788.179
MY_irld52	d1	rep3	tifs	../tifs/Snap-91289-Image Export-28.tif	2	TRUE	765.986
MY_irld52	d1	rep3	tifs	../tifs/Snap-91278-Image Export-17.tif	0	TRUE	787.773
MY_irld52	d1	rep3	tifs	../tifs/Snap-91267-Image Export-06.tif	0	TRUE	806.841
MY_irld52	d1	rep3	tifs	../tifs/Snap-91267-Image Export-06.tif	1	TRUE	791.121
MY_irld52	d1	rep3	tifs	../tifs/Snap-91290-Image Export-29.tif	0	TRUE	793.396
MY_irld52	d1	rep3	tifs	../tifs/Snap-91290-Image Export-29.tif	1	TRUE	781.836
MY_irld52	d1	rep3	tifs	../tifs/Snap-91290-Image Export-29.tif	2	TRUE	755.444
MY_irld52	d1	rep3	tifs	../tifs/Snap-91274-Image Export-13.tif	0	TRUE	774.29
MY_irld52	d1	rep3	tifs	../tifs/Snap-91274-Image Export-13.tif	1	TRUE	795.227
MY_irld52	d1	rep3	tifs	../tifs/Snap-91276-Image Export-15.tif	0	TRUE	836.933
MY_irld52	d1	rep3	tifs	../tifs/Snap-91271-Image Export-10.tif	0	TRUE	760.531
MY_irld52	d1	rep3	tifs	../tifs/Snap-91271-Image Export-10.tif	1	TRUE	756.739
MY_irld52	d1	rep3	tifs	../tifs/Snap-91277-Image Export-16.tif	1	TRUE	771.701
MY_irld52	d1	rep3	tifs	../tifs/Snap-91277-Image Export-16.tif	2	TRUE	805.638
MY_irld52	d1	rep3	tifs	../tifs/Snap-91275-Image Export-14.tif	1	TRUE	767.411
MY_irld52	d1	rep3	tifs	../tifs/Snap-91272-Image Export-11.tif	0	TRUE	772.329
MY_irld52	d1	rep3	tifs	../tifs/Snap-91299-Image Export-38.tif	1	TRUE	657.753
MY_irld52	d1	rep3	tifs	../tifs/Snap-91299-Image Export-38.tif	2	TRUE	798.131
MY_irld52	d1	rep3	tifs	../tifs/Snap-91286-Image Export-25.tif	1	TRUE	762.952
MY_irld52	d1	rep3	tifs	../tifs/Snap-91286-Image Export-25.tif	2	TRUE	784.555
MY_irld52	d1	rep3	tifs	../tifs/Snap-91286-Image Export-25.tif	3	TRUE	622.521
MY_irld52	d1	rep3	tifs	../tifs/Snap-91283-Image Export-22.tif	0	TRUE	739.908
MY_irld52	d1	rep3	tifs	../tifs/Snap-91283-Image Export-22.tif	1	TRUE	808.228
MY_irld52	d1	rep3	tifs	../tifs/Snap-91283-Image Export-22.tif	2	TRUE	804.88
MY_irld52	d1	rep3	tifs	../tifs/Snap-91282-Image Export-21.tif	0	TRUE	821.841
MY_irld52	d1	rep3	tifs	../tifs/Snap-91282-Image Export-21.tif	1	TRUE	806.657
MY_irld52	d1	rep3	tifs	../tifs/Snap-91282-Image Export-21.tif	2	TRUE	793.58
MY_irld52	d1	rep3	tifs	../tifs/Snap-91285-Image Export-24.tif	0	TRUE	790.585
MY_irld52	d1	rep3	tifs	../tifs/Snap-91285-Image Export-24.tif	1	TRUE	764.821
MY_irld52	d1	rep3	tifs	../tifs/Snap-91269-Image Export-08.tif	0	TRUE	801.034
MY_irld52	d1	rep3	tifs	../tifs/Snap-91287-Image Export-26.tif	0	TRUE	778.58
MY_irld52	d1	rep3	tifs	../tifs/Snap-91287-Image Export-26.tif	1	TRUE	786.164
MY_irld52	d1	rep3	tifs	../tifs/Snap-91287-Image Export-26.tif	2	TRUE	708.836
MY_irld52	d1	rep3	tifs	../tifs/Snap-91270-Image Export-09.tif	0	TRUE	642.255
MY_irld52	d1	rep3	tifs	../tifs/Snap-91270-Image Export-09.tif	1	TRUE	821.305
MY_irld52	d1	rep3	tifs	../tifs/Snap-91284-Image Export-23.tif	0	TRUE	745.271
MY_irld52	d1	rep3	tifs	../tifs/Snap-91280-Image Export-19.tif	1	TRUE	745.401
MY_irld52	d1	rep3	tifs	../tifs/Snap-91294-Image Export-33.tif	0	TRUE	780.763
MY_irld52	d1	rep3	tifs	../tifs/Snap-91293-Image Export-32.tif	1	TRUE	801.792
MY_irld52	d1	rep3	tifs	../tifs/Snap-91291-Image Export-30.tif	0	TRUE	764.561
MY_irld52	d1	rep3	tifs	../tifs/Snap-91291-Image Export-30.tif	1	TRUE	783.223
MY_irld52	d1	rep3	tifs	../tifs/Snap-91291-Image Export-30.tif	2	TRUE	775.899
MY_irld52	d1	rep3	tifs	../tifs/Snap-91296-Image Export-35.tif	0	TRUE	787.643
MY_irld52	d1	rep3	tifs	../tifs/Snap-91296-Image Export-35.tif	1	TRUE	764.507
MY_irld52	d1	rep3	tifs	../tifs/Snap-91297-Image Export-36.tif	0	TRUE	683.425
MY_irld52	d1	rep3	tifs	../tifs/Snap-91297-Image Export-36.tif	1	TRUE	748.527
MY_irld52	d1	rep3	tifs	../tifs/Snap-91292-Image Export-31.tif	0	TRUE	763.434
MY_irld52	d1	rep3	tifs	../tifs/Snap-91292-Image Export-31.tif	1	TRUE	764.599
MY_irld52	d1	rep3	tifs	../tifs/Snap-91292-Image Export-31.tif	2	TRUE	774.382
MY_irld52	d1	rep3	tifs	../tifs/Snap-91295-Image Export-34.tif	1	TRUE	751.116
MY_irld52	d1	rep3	tifs	../tifs/Snap-91295-Image Export-34.tif	2	TRUE	772.681
MY_irld52	d1	rep3	tifs	../tifs/Snap-91295-Image Export-34.tif	4	TRUE	723.207
MY_irld52	d1	rep3	tifs	../tifs/Snap-91295-Image Export-34.tif	5	TRUE	729.773
MY_irld52	d1	rep3	tifs	../tifs/Snap-91295-Image Export-34.tif	6	TRUE	801.126
MY_irld52	d1	rep3	tifs	../tifs/Snap-91279-Image Export-18.tif	0	TRUE	820.86
MY_irld52	d1	rep3	tifs	../tifs/Snap-91279-Image Export-18.tif	1	TRUE	782.28
N2_irld52	d1	rep3	tifs	../tifs/Snap-91234-Image Export-07.tif	0	TRUE	791.435
N2_irld52	d1	rep3	tifs	../tifs/Snap-91234-Image Export-07.tif	1	TRUE	808.136
N2_irld52	d1	rep3	tifs	../tifs/Snap-91253-Image Export-26.tif	0	TRUE	818.493
N2_irld52	d1	rep3	tifs	../tifs/Snap-91251-Image Export-24.tif	1	TRUE	805.232
N2_irld52	d1	rep3	tifs	../tifs/Snap-91237-Image Export-10.tif	0	TRUE	719.101
N2_irld52	d1	rep3	tifs	../tifs/Snap-91237-Image Export-10.tif	1	TRUE	767.595
N2_irld52	d1	rep3	tifs	../tifs/Snap-91237-Image Export-10.tif	2	TRUE	774.068
N2_irld52	d1	rep3	tifs	../tifs/Snap-91230-Image Export-03.tif	3	TRUE	791.657
N2_irld52	d1	rep3	tifs	../tifs/Snap-91230-Image Export-03.tif	4	TRUE	799.609
N2_irld52	d1	rep3	tifs	../tifs/Snap-91230-Image Export-03.tif	6	TRUE	829.035
N2_irld52	d1	rep3	tifs	../tifs/Snap-91252-Image Export-25.tif	0	TRUE	832.198
N2_irld52	d1	rep3	tifs	../tifs/Snap-91252-Image Export-25.tif	1	TRUE	824.078
N2_irld52	d1	rep3	tifs	../tifs/Snap-91252-Image Export-25.tif	2	TRUE	813.092
N2_irld52	d1	rep3	tifs	../tifs/Snap-91229-Image Export-02.tif	1	TRUE	811.706
N2_irld52	d1	rep3	tifs	../tifs/Snap-91229-Image Export-02.tif	2	TRUE	799.831
N2_irld52	d1	rep3	tifs	../tifs/Snap-91229-Image Export-02.tif	3	TRUE	831.976
N2_irld52	d1	rep3	tifs	../tifs/Snap-91232-Image Export-05.tif	1	TRUE	827.87
N2_irld52	d1	rep3	tifs	../tifs/Snap-91232-Image Export-05.tif	2	TRUE	828.314
N2_irld52	d1	rep3	tifs	../tifs/Snap-91232-Image Export-05.tif	3	TRUE	837.599
N2_irld52	d1	rep3	tifs	../tifs/Snap-91249-Image Export-22.tif	0	TRUE	776.435
N2_irld52	d1	rep3	tifs	../tifs/Snap-91249-Image Export-22.tif	1	TRUE	742.145
N2_irld52	d1	rep3	tifs	../tifs/Snap-91249-Image Export-22.tif	2	TRUE	815.904
N2_irld52	d1	rep3	tifs	../tifs/Snap-91249-Image Export-22.tif	4	TRUE	841.353
N2_irld52	d1	rep3	tifs	../tifs/Snap-91257-Image Export-30.tif	1	TRUE	820.508
N2_irld52	d1	rep3	tifs	../tifs/Snap-91257-Image Export-30.tif	3	TRUE	816.44
N2_irld52	d1	rep3	tifs	../tifs/Snap-91231-Image Export-04.tif	0	TRUE	800.092
N2_irld52	d1	rep3	tifs	../tifs/Snap-91231-Image Export-04.tif	1	TRUE	813.981
N2_irld52	d1	rep3	tifs	../tifs/Snap-91231-Image Export-04.tif	2	TRUE	869.706
N2_irld52	d1	rep3	tifs	../tifs/Snap-91254-Image Export-27.tif	2	TRUE	843.85
N2_irld52	d1	rep3	tifs	../tifs/Snap-91254-Image Export-27.tif	3	TRUE	795.855
N2_irld52	d1	rep3	tifs	../tifs/Snap-91254-Image Export-27.tif	4	TRUE	843.406
N2_irld52	d1	rep3	tifs	../tifs/Snap-91254-Image Export-27.tif	5	TRUE	801.976
N2_irld52	d1	rep3	tifs	../tifs/Snap-91254-Image Export-27.tif	6	TRUE	811.353
N2_irld52	d1	rep3	tifs	../tifs/Snap-91248-Image Export-21.tif	1	TRUE	792.063
N2_irld52	d1	rep3	tifs	../tifs/Snap-91248-Image Export-21.tif	3	TRUE	815.904
N2_irld52	d1	rep3	tifs	../tifs/Snap-91248-Image Export-21.tif	4	TRUE	800.498
N2_irld52	d1	rep3	tifs	../tifs/Snap-91248-Image Export-21.tif	7	TRUE	807.599
N2_irld52	d1	rep3	tifs	../tifs/Snap-91248-Image Export-21.tif	8	TRUE	825.909
N2_irld52	d1	rep3	tifs	../tifs/Snap-91233-Image Export-06.tif	0	TRUE	864.619
N2_irld52	d1	rep3	tifs	../tifs/Snap-91233-Image Export-06.tif	1	TRUE	801.348
N2_irld52	d1	rep3	tifs	../tifs/Snap-91259-Image Export-32.tif	0	TRUE	785.276
N2_irld52	d1	rep3	tifs	../tifs/Snap-91259-Image Export-32.tif	1	TRUE	719.952
N2_irld52	d1	rep3	tifs	../tifs/Snap-91259-Image Export-32.tif	2	TRUE	795.763
N2_irld52	d1	rep3	tifs	../tifs/Snap-91259-Image Export-32.tif	3	TRUE	797.28
N2_irld52	d1	rep3	tifs	../tifs/Snap-91258-Image Export-31.tif	0	TRUE	779.469
N2_irld52	d1	rep3	tifs	../tifs/Snap-91258-Image Export-31.tif	1	TRUE	807.822
N2_irld52	d1	rep3	tifs	../tifs/Snap-91258-Image Export-31.tif	2	TRUE	846.808
N2_irld52	d1	rep3	tifs	../tifs/Snap-91258-Image Export-31.tif	3	TRUE	782.058
N2_irld52	d1	rep3	tifs	../tifs/Snap-91247-Image Export-20.tif	3	TRUE	796.744
N2_irld52	d1	rep3	tifs	../tifs/Snap-91247-Image Export-20.tif	5	TRUE	836.174
N2_irld52	d1	rep3	tifs	../tifs/Snap-91247-Image Export-20.tif	7	TRUE	822.913
N2_irld52	d1	rep3	tifs	../tifs/Snap-91247-Image Export-20.tif	8	TRUE	807.507
N2_irld52	d1	rep3	tifs	../tifs/Snap-91246-Image Export-19.tif	1	TRUE	841.537
N2_irld52	d1	rep3	tifs	../tifs/Snap-91246-Image Export-19.tif	2	TRUE	807.599
N2_irld52	d1	rep3	tifs	../tifs/Snap-91246-Image Export-19.tif	3	TRUE	805.14
N2_irld52	d1	rep3	tifs	../tifs/Snap-91246-Image Export-19.tif	4	TRUE	823.409
N2_irld52	d1	rep3	tifs	../tifs/Snap-91246-Image Export-19.tif	6	TRUE	850.508
N2_irld52	d1	rep3	tifs	../tifs/Snap-91246-Image Export-19.tif	10	TRUE	816.976
N2_irld52	d1	rep3	tifs	../tifs/Snap-91246-Image Export-19.tif	11	TRUE	840.687
N2_irld52	d1	rep3	tifs	../tifs/Snap-91246-Image Export-19.tif	12	TRUE	786.701
N2_irld52	d1	rep3	tifs	../tifs/Snap-91238-Image Export-11.tif	0	TRUE	825.817
N2_irld52	d1	rep3	tifs	../tifs/Snap-91245-Image Export-18.tif	2	TRUE	826.483
N2_irld52	d1	rep3	tifs	../tifs/Snap-91239-Image Export-12.tif	0	TRUE	829.517
N2_irld52	d1	rep3	tifs	../tifs/Snap-91240-Image Export-13.tif	0	TRUE	843.184
N2_irld52	d1	rep3	tifs	../tifs/Snap-91244-Image Export-17.tif	0	TRUE	827.87
N2_irld52	d1	rep3	tifs	../tifs/Snap-91244-Image Export-17.tif	1	TRUE	822.469
N2_irld52	d1	rep3	tifs	../tifs/Snap-91242-Image Export-15.tif	0	TRUE	813.537
N2_irld52	d1	rep3	tifs	../tifs/Snap-91256-Image Export-29.tif	0	TRUE	809.116
N2_irld52	d1	rep3	tifs	../tifs/Snap-91255-Image Export-28.tif	0	TRUE	837.913
N2_irld52	d1	rep3	tifs	../tifs/Snap-91255-Image Export-28.tif	1	TRUE	821.711
N2_irld52	d1	rep3	tifs	../tifs/Snap-91235-Image Export-08.tif	0	TRUE	810.725
MY2147	d1	rep3	tifs	../tifs/Snap-91143-Image Export-14.tif	0	TRUE	741.517
MY2147	d1	rep3	tifs	../tifs/Snap-91158-Image Export-29.tif	0	TRUE	756.739
MY2147	d1	rep3	tifs	../tifs/Snap-91142-Image Export-13.tif	0	TRUE	705.212
MY2147	d1	rep3	tifs	../tifs/Snap-91138-Image Export-09.tif	0	TRUE	690.396
MY2147	d1	rep3	tifs	../tifs/Snap-91138-Image Export-09.tif	1	TRUE	737.541
MY2147	d1	rep3	tifs	../tifs/Snap-91141-Image Export-12.tif	0	TRUE	716.42
MY2147	d1	rep3	tifs	../tifs/Snap-91146-Image Export-17.tif	0	TRUE	761.918
MY2147	d1	rep3	tifs	../tifs/Snap-91137-Image Export-08.tif	0	TRUE	692.043
MY2147	d1	rep3	tifs	../tifs/Snap-91165-Image Export-36.tif	0	TRUE	819.918
MY2147	d1	rep3	tifs	../tifs/Snap-91162-Image Export-33.tif	0	TRUE	730.976
MY2147	d1	rep3	tifs	../tifs/Snap-91166-Image Export-37.tif	0	TRUE	728.256
MY2147	d1	rep3	tifs	../tifs/Snap-91161-Image Export-32.tif	0	TRUE	748.971
MY2147	d1	rep3	tifs	../tifs/Snap-91164-Image Export-35.tif	0	TRUE	774.734
MY2147	d1	rep3	tifs	../tifs/Snap-91163-Image Export-34.tif	0	TRUE	753.927
MY2147	d1	rep3	tifs	../tifs/Snap-91163-Image Export-34.tif	1	TRUE	770.314
MY2147	d1	rep3	tifs	../tifs/Snap-91157-Image Export-28.tif	0	TRUE	665.521
MY2147	d1	rep3	tifs	../tifs/Snap-91149-Image Export-20.tif	0	TRUE	737.449
MY2147	d1	rep3	tifs	../tifs/Snap-91155-Image Export-26.tif	0	TRUE	786.923
MY2147	d1	rep3	tifs	../tifs/Snap-91152-Image Export-23.tif	0	TRUE	766.836
MY2147	d1	rep3	tifs	../tifs/Snap-91150-Image Export-21.tif	0	TRUE	790.455
MY2147	d1	rep3	tifs	../tifs/Snap-91150-Image Export-21.tif	1	TRUE	758.034
MY2147	d1	rep3	tifs	../tifs/Snap-91156-Image Export-27.tif	0	TRUE	676.009
MY2147	d1	rep3	tifs	../tifs/Snap-91156-Image Export-27.tif	1	TRUE	769.111
MY2147	d1	rep3	tifs	../tifs/Snap-91151-Image Export-22.tif	1	TRUE	774.42
MY2147	d1	rep3	tifs	../tifs/Snap-91151-Image Export-22.tif	2	TRUE	739.556
MY2147	d1	rep3	tifs	../tifs/Snap-91133-Image Export-04.tif	0	TRUE	808.672
MY2147	d1	rep3	tifs	../tifs/Snap-91154-Image Export-25.tif	0	TRUE	741.295
MY2147	d1	rep3	tifs	../tifs/Snap-91153-Image Export-24.tif	0	TRUE	751.024
MY2147	d1	rep3	tifs	../tifs/Snap-91134-Image Export-05.tif	0	TRUE	776.159
MY2147	d1	rep3	tifs	../tifs/Snap-91130-Image Export-01.tif	1	TRUE	792.638
MY2147	d1	rep3	tifs	../tifs/Snap-91148-Image Export-19.tif	0	TRUE	796.169
MY2147	d1	rep3	tifs	../tifs/Snap-91139-Image Export-10.tif	0	TRUE	774.956
MY2147	d1	rep3	tifs	../tifs/Snap-91147-Image Export-18.tif	0	TRUE	638.907
MY2147	d1	rep3	tifs	../tifs/Snap-91159-Image Export-30.tif	0	TRUE	724.372
N2	d1	rep3	tifs	../tifs/Snap-91123-Image Export-24.tif	0	TRUE	807.377
N2	d1	rep3	tifs	../tifs/Snap-91113-Image Export-14.tif	0	TRUE	802.735
N2	d1	rep3	tifs	../tifs/Snap-91113-Image Export-14.tif	1	TRUE	798.537
N2	d1	rep3	tifs	../tifs/Snap-91113-Image Export-14.tif	2	TRUE	789.512
N2	d1	rep3	tifs	../tifs/Snap-91113-Image Export-14.tif	3	TRUE	707.265
N2	d1	rep3	tifs	../tifs/Snap-91122-Image Export-23.tif	0	TRUE	818.179
N2	d1	rep3	tifs	../tifs/Snap-91125-Image Export-26.tif	0	TRUE	813
N2	d1	rep3	tifs	../tifs/Snap-91109-Image Export-10.tif	0	TRUE	806.083
N2	d1	rep3	tifs	../tifs/Snap-91115-Image Export-16.tif	0	TRUE	774.734
N2	d1	rep3	tifs	../tifs/Snap-91115-Image Export-16.tif	1	TRUE	841.889
N2	d1	rep3	tifs	../tifs/Snap-91120-Image Export-21.tif	1	TRUE	803.493
N2	d1	rep3	tifs	../tifs/Snap-91112-Image Export-13.tif	0	TRUE	772.237
N2	d1	rep3	tifs	../tifs/Snap-91112-Image Export-13.tif	1	TRUE	792.952
N2	d1	rep3	tifs	../tifs/Snap-91112-Image Export-13.tif	2	TRUE	811.391
N2	d1	rep3	tifs	../tifs/Snap-91114-Image Export-15.tif	2	TRUE	515.047
N2	d1	rep3	tifs	../tifs/Snap-91114-Image Export-15.tif	7	TRUE	762.546
N2	d1	rep3	tifs	../tifs/Snap-91114-Image Export-15.tif	8	TRUE	811.484
N2	d1	rep3	tifs	../tifs/Snap-91116-Image Export-17.tif	0	TRUE	761.029
N2	d1	rep3	tifs	../tifs/Snap-91116-Image Export-17.tif	1	TRUE	850.73
N2	d1	rep3	tifs	../tifs/Snap-91116-Image Export-17.tif	2	TRUE	773.087
N2	d1	rep3	tifs	../tifs/Snap-91124-Image Export-25.tif	0	TRUE	807.73
N2	d1	rep3	tifs	../tifs/Snap-91111-Image Export-12.tif	0	TRUE	806.971
N2	d1	rep3	tifs	../tifs/Snap-91105-Image Export-06.tif	0	TRUE	804.252
N2	d1	rep3	tifs	../tifs/Snap-91102-Image Export-03.tif	0	TRUE	735.304
N2	d1	rep3	tifs	../tifs/Snap-91100-Image Export-01.tif	0	TRUE	831.976
N2	d1	rep3	tifs	../tifs/Snap-91100-Image Export-01.tif	1	TRUE	806.121
N2	d1	rep3	tifs	../tifs/Snap-91129-Image Export-30.tif	0	TRUE	793.396
N2	d1	rep3	tifs	../tifs/Snap-91106-Image Export-07.tif	0	TRUE	857.74
N2	d1	rep3	tifs	../tifs/Snap-91106-Image Export-07.tif	1	TRUE	799.295
N2	d1	rep3	tifs	../tifs/Snap-91101-Image Export-02.tif	0	TRUE	798.223
N2	d1	rep3	tifs	../tifs/Snap-91101-Image Export-02.tif	1	TRUE	732.898
N2	d1	rep3	tifs	../tifs/Snap-91104-Image Export-05.tif	1	TRUE	826.89
N2	d1	rep3	tifs	../tifs/Snap-91104-Image Export-05.tif	2	TRUE	741.739
N2	d1	rep3	tifs	../tifs/Snap-91104-Image Export-05.tif	3	TRUE	783.575
N2	d1	rep3	tifs	../tifs/Snap-91103-Image Export-04.tif	0	TRUE	805.991
N2	d1	rep3	tifs	../tifs/Snap-91103-Image Export-04.tif	1	TRUE	792.73
N2	d1	rep3	tifs	../tifs/Snap-91103-Image Export-04.tif	2	TRUE	743.662
N2	d1	rep3	tifs	../tifs/Snap-91119-Image Export-20.tif	0	TRUE	825.281
N2	d1	rep3	tifs	../tifs/Snap-91118-Image Export-19.tif	3	TRUE	783.131
N2	d1	rep3	tifs	../tifs/Snap-91118-Image Export-19.tif	4	TRUE	827.112
N2	d1	rep3	tifs	../tifs/Snap-91107-Image Export-08.tif	0	TRUE	828
N2	d1	rep3	tifs	../tifs/Snap-91107-Image Export-08.tif	1	TRUE	775.899
N2	d1	rep3	tifs	../tifs/Snap-91128-Image Export-29.tif	0	TRUE	783.575
N2	d1	rep3	tifs	../tifs/Snap-91117-Image Export-18.tif	1	TRUE	803.179
N2	d1	rep3	tifs	../tifs/Snap-91117-Image Export-18.tif	3	TRUE	828.314
N2	d1	rep3	tifs	../tifs/Snap-91117-Image Export-18.tif	7	TRUE	841.391
N2	d1	rep3	tifs	../tifs/Snap-91127-Image Export-28.tif	0	TRUE	778.933
MY_irld39	d1	rep4	tifs	../tifs/Snap-91482-Image Export-04.tif	0	TRUE	740.667
MY_irld39	d1	rep4	tifs	../tifs/Snap-91482-Image Export-04.tif	1	TRUE	725.483
MY_irld39	d1	rep4	tifs	../tifs/Snap-91481-Image Export-03.tif	0	TRUE	757.497
MY_irld39	d1	rep4	tifs	../tifs/Snap-91480-Image Export-02.tif	0	TRUE	728.294
MY_irld39	d1	rep4	tifs	../tifs/Snap-91507-Image Export-29.tif	0	TRUE	715.884
MY_irld39	d1	rep4	tifs	../tifs/Snap-91506-Image Export-28.tif	0	TRUE	611.221
MY_irld39	d1	rep4	tifs	../tifs/Snap-91485-Image Export-07.tif	1	TRUE	738.613
MY_irld39	d1	rep4	tifs	../tifs/Snap-91485-Image Export-07.tif	3	TRUE	739.594
MY_irld39	d1	rep4	tifs	../tifs/Snap-91484-Image Export-06.tif	2	TRUE	774.198
MY_irld39	d1	rep4	tifs	../tifs/Snap-91484-Image Export-06.tif	3	TRUE	747.324
MY_irld39	d1	rep4	tifs	../tifs/Snap-91484-Image Export-06.tif	4	TRUE	812.778
MY_irld39	d1	rep4	tifs	../tifs/Snap-91490-Image Export-12.tif	0	TRUE	766.43
MY_irld39	d1	rep4	tifs	../tifs/Snap-91490-Image Export-12.tif	1	TRUE	799.111
MY_irld39	d1	rep4	tifs	../tifs/Snap-91495-Image Export-17.tif	0	TRUE	735.802
MY_irld39	d1	rep4	tifs	../tifs/Snap-91495-Image Export-17.tif	1	TRUE	719.009
MY_irld39	d1	rep4	tifs	../tifs/Snap-91495-Image Export-17.tif	2	TRUE	749.637
MY_irld39	d1	rep4	tifs	../tifs/Snap-91489-Image Export-11.tif	0	TRUE	744.328
MY_irld39	d1	rep4	tifs	../tifs/Snap-91489-Image Export-11.tif	1	TRUE	726.869
MY_irld39	d1	rep4	tifs	../tifs/Snap-91494-Image Export-16.tif	1	TRUE	761.121
MY_irld39	d1	rep4	tifs	../tifs/Snap-91494-Image Export-16.tif	2	TRUE	767.595
MY_irld39	d1	rep4	tifs	../tifs/Snap-91488-Image Export-10.tif	0	TRUE	739.908
MY_irld39	d1	rep4	tifs	../tifs/Snap-91488-Image Export-10.tif	1	TRUE	804.474
MY_irld39	d1	rep4	tifs	../tifs/Snap-91488-Image Export-10.tif	2	TRUE	761.343
MY_irld39	d1	rep4	tifs	../tifs/Snap-91492-Image Export-14.tif	0	TRUE	784.87
MY_irld39	d1	rep4	tifs	../tifs/Snap-91492-Image Export-14.tif	1	TRUE	435.481
MY_irld39	d1	rep4	tifs	../tifs/Snap-91493-Image Export-15.tif	0	TRUE	695.261
MY_irld39	d1	rep4	tifs	../tifs/Snap-91493-Image Export-15.tif	1	TRUE	781.522
MY_irld39	d1	rep4	tifs	../tifs/Snap-91497-Image Export-19.tif	0	TRUE	801.44
MY_irld39	d1	rep4	tifs	../tifs/Snap-91497-Image Export-19.tif	1	TRUE	604.211
MY_irld39	d1	rep4	tifs	../tifs/Snap-91497-Image Export-19.tif	2	TRUE	768.705
MY_irld39	d1	rep4	tifs	../tifs/Snap-91496-Image Export-18.tif	0	TRUE	820.546
MY_irld39	d1	rep4	tifs	../tifs/Snap-91496-Image Export-18.tif	2	TRUE	776.251
MY_irld39	d1	rep4	tifs	../tifs/Snap-91508-Image Export-30.tif	0	TRUE	751.43
MY_irld39	d1	rep4	tifs	../tifs/Snap-91508-Image Export-30.tif	2	TRUE	299.876
MY_irld39	d1	rep4	tifs	../tifs/Snap-91501-Image Export-23.tif	0	TRUE	782.464
MY_irld39	d1	rep4	tifs	../tifs/Snap-91486-Image Export-08.tif	0	TRUE	834.566
MY_irld39	d1	rep4	tifs	../tifs/Snap-91486-Image Export-08.tif	1	TRUE	795.633
MY_irld39	d1	rep4	tifs	../tifs/Snap-91486-Image Export-08.tif	2	TRUE	748.12
MY_irld39	d1	rep4	tifs	../tifs/Snap-91505-Image Export-27.tif	0	TRUE	807.507
MY_irld39	d1	rep4	tifs	../tifs/Snap-91505-Image Export-27.tif	1	TRUE	751.836
MY_irld39	d1	rep4	tifs	../tifs/Snap-91505-Image Export-27.tif	3	TRUE	632.434
MY_irld39	d1	rep4	tifs	../tifs/Snap-91504-Image Export-26.tif	0	TRUE	749.155
MY_irld39	d1	rep4	tifs	../tifs/Snap-91504-Image Export-26.tif	1	TRUE	737.097
MY_irld39	d1	rep4	tifs	../tifs/Snap-91502-Image Export-24.tif	0	TRUE	798.851
MY_irld39	d1	rep4	tifs	../tifs/Snap-91502-Image Export-24.tif	1	TRUE	791.121
MY_irld39	d1	rep4	tifs	../tifs/Snap-91498-Image Export-20.tif	2	TRUE	782.725
MY_irld39	d1	rep4	tifs	../tifs/Snap-91498-Image Export-20.tif	3	TRUE	730.623
MY_irld39	d1	rep4	tifs	../tifs/Snap-91498-Image Export-20.tif	4	TRUE	645.787
MY_irld39	d1	rep4	tifs	../tifs/Snap-91498-Image Export-20.tif	5	TRUE	790.14
MY_irld39	d1	rep4	tifs	../tifs/Snap-91499-Image Export-21.tif	1	TRUE	784.648
MY_irld39	d1	rep4	tifs	../tifs/Snap-91499-Image Export-21.tif	2	TRUE	777.324
MY_irld39	d1	rep4	tifs	../tifs/Snap-91499-Image Export-21.tif	3	TRUE	740.667
MY_irld39	d1	rep4	tifs	../tifs/Snap-91499-Image Export-21.tif	4	TRUE	739.15
N2_irld39	d1	rep4	tifs	../tifs/Snap-91469-Image Export-17.tif	0	TRUE	781.392
N2_irld39	d1	rep4	tifs	../tifs/Snap-91469-Image Export-17.tif	1	TRUE	833.271
N2_irld39	d1	rep4	tifs	../tifs/Snap-91469-Image Export-17.tif	2	TRUE	847.919
N2_irld39	d1	rep4	tifs	../tifs/Snap-91469-Image Export-17.tif	3	TRUE	793.986
N2_irld39	d1	rep4	tifs	../tifs/Snap-91468-Image Export-16.tif	0	TRUE	842.02
N2_irld39	d1	rep4	tifs	../tifs/Snap-91466-Image Export-14.tif	1	TRUE	763.082
N2_irld39	d1	rep4	tifs	../tifs/Snap-91467-Image Export-15.tif	0	TRUE	809.967
N2_irld39	d1	rep4	tifs	../tifs/Snap-91467-Image Export-15.tif	2	TRUE	777.102
N2_irld39	d1	rep4	tifs	../tifs/Snap-91467-Image Export-15.tif	3	TRUE	761.343
N2_irld39	d1	rep4	tifs	../tifs/Snap-91467-Image Export-15.tif	4	TRUE	798.407
N2_irld39	d1	rep4	tifs	../tifs/Snap-91462-Image Export-10.tif	0	TRUE	796.169
N2_irld39	d1	rep4	tifs	../tifs/Snap-91463-Image Export-11.tif	2	TRUE	742.59
N2_irld39	d1	rep4	tifs	../tifs/Snap-91463-Image Export-11.tif	3	TRUE	776.343
N2_irld39	d1	rep4	tifs	../tifs/Snap-91465-Image Export-13.tif	0	TRUE	813
N2_irld39	d1	rep4	tifs	../tifs/Snap-91464-Image Export-12.tif	0	TRUE	817.513
N2_irld39	d1	rep4	tifs	../tifs/Snap-91457-Image Export-05.tif	0	TRUE	850.6
N2_irld39	d1	rep4	tifs	../tifs/Snap-91457-Image Export-05.tif	1	TRUE	660.473
N2_irld39	d1	rep4	tifs	../tifs/Snap-91457-Image Export-05.tif	2	TRUE	753.797
N2_irld39	d1	rep4	tifs	../tifs/Snap-91457-Image Export-05.tif	3	TRUE	765.265
N2_irld39	d1	rep4	tifs	../tifs/Snap-91456-Image Export-04.tif	1	TRUE	736.468
N2_irld39	d1	rep4	tifs	../tifs/Snap-91456-Image Export-04.tif	2	TRUE	764.599
N2_irld39	d1	rep4	tifs	../tifs/Snap-91456-Image Export-04.tif	3	TRUE	797.686
N2_irld39	d1	rep4	tifs	../tifs/Snap-91478-Image Export-26.tif	0	TRUE	780.135
N2_irld39	d1	rep4	tifs	../tifs/Snap-91478-Image Export-26.tif	1	TRUE	783.889
N2_irld39	d1	rep4	tifs	../tifs/Snap-91478-Image Export-26.tif	2	TRUE	830.682
N2_irld39	d1	rep4	tifs	../tifs/Snap-91478-Image Export-26.tif	3	TRUE	796.077
N2_irld39	d1	rep4	tifs	../tifs/Snap-91453-Image Export-01.tif	0	TRUE	773.31
N2_irld39	d1	rep4	tifs	../tifs/Snap-91454-Image Export-02.tif	0	TRUE	801.256
N2_irld39	d1	rep4	tifs	../tifs/Snap-91461-Image Export-09.tif	1	TRUE	770.498
N2_irld39	d1	rep4	tifs	../tifs/Snap-91461-Image Export-09.tif	2	TRUE	792.508
N2_irld39	d1	rep4	tifs	../tifs/Snap-91461-Image Export-09.tif	3	TRUE	752.411
N2_irld39	d1	rep4	tifs	../tifs/Snap-91460-Image Export-08.tif	3	TRUE	823.45
N2_irld39	d1	rep4	tifs	../tifs/Snap-91460-Image Export-08.tif	4	TRUE	780.855
N2_irld39	d1	rep4	tifs	../tifs/Snap-91460-Image Export-08.tif	6	TRUE	646.768
N2_irld39	d1	rep4	tifs	../tifs/Snap-91460-Image Export-08.tif	7	TRUE	758.034
N2_irld39	d1	rep4	tifs	../tifs/Snap-91455-Image Export-03.tif	0	TRUE	759.865
N2_irld39	d1	rep4	tifs	../tifs/Snap-91455-Image Export-03.tif	1	TRUE	749.063
N2_irld39	d1	rep4	tifs	../tifs/Snap-91471-Image Export-19.tif	0	TRUE	785.628
N2_irld39	d1	rep4	tifs	../tifs/Snap-91471-Image Export-19.tif	1	TRUE	728.164
N2_irld39	d1	rep4	tifs	../tifs/Snap-91470-Image Export-18.tif	0	TRUE	809.116
N2_irld39	d1	rep4	tifs	../tifs/Snap-91474-Image Export-22.tif	3	TRUE	660.343
N2_irld39	d1	rep4	tifs	../tifs/Snap-91474-Image Export-22.tif	11	TRUE	558.177
N2_irld39	d1	rep4	tifs	../tifs/Snap-91474-Image Export-22.tif	12	TRUE	805.232
N2_irld39	d1	rep4	tifs	../tifs/Snap-91475-Image Export-23.tif	0	TRUE	747.232
N2_irld39	d1	rep4	tifs	../tifs/Snap-91475-Image Export-23.tif	3	TRUE	800.498
N2_irld39	d1	rep4	tifs	../tifs/Snap-91475-Image Export-23.tif	4	TRUE	803.309
N2_irld39	d1	rep4	tifs	../tifs/Snap-91476-Image Export-24.tif	0	TRUE	790.899
N2_irld39	d1	rep4	tifs	../tifs/Snap-91458-Image Export-06.tif	0	TRUE	818.401
N2_irld39	d1	rep4	tifs	../tifs/Snap-91459-Image Export-07.tif	0	TRUE	810.503
N2_irld39	d1	rep4	tifs	../tifs/Snap-91473-Image Export-21.tif	3	TRUE	797.058
N2_irld39	d1	rep4	tifs	../tifs/Snap-91473-Image Export-21.tif	4	TRUE	776.213
N2_irld39	d1	rep4	tifs	../tifs/Snap-91473-Image Export-21.tif	5	TRUE	562.245
N2_irld39	d1	rep4	tifs	../tifs/Snap-91473-Image Export-21.tif	9	TRUE	591.357
N2_irld39	d1	rep4	tifs	../tifs/Snap-91473-Image Export-21.tif	11	TRUE	810.411
N2_irld39	d1	rep4	tifs	../tifs/Snap-91473-Image Export-21.tif	15	TRUE	735.802
N2_irld39	d1	rep4	tifs	../tifs/Snap-91473-Image Export-21.tif	20	TRUE	736.468
N2_irld39	d1	rep4	tifs	../tifs/Snap-91473-Image Export-21.tif	21	TRUE	792.193
N2_irld39	d1	rep4	tifs	../tifs/Snap-91472-Image Export-20.tif	0	TRUE	739.556
N2_irld39	d1	rep4	tifs	../tifs/Snap-91472-Image Export-20.tif	2	TRUE	786.478
N2_irld39	d1	rep4	tifs	../tifs/Snap-91472-Image Export-20.tif	3	TRUE	710
N2_irld39	d1	rep4	tifs	../tifs/Snap-91472-Image Export-20.tif	5	TRUE	683.869
N2_irld39	d1	rep4	tifs	../tifs/Snap-91472-Image Export-20.tif	6	TRUE	781.836
N2_irld39	d1	rep4	tifs	../tifs/Snap-91472-Image Export-20.tif	10	TRUE	715.347
N2_irld39	d1	rep4	tifs	../tifs/Snap-91472-Image Export-20.tif	11	TRUE	735.396
MY_irld52	d1	rep4	tifs	../tifs/Snap-91556-Image Export-06.tif	0	TRUE	764.155
MY_irld52	d1	rep4	tifs	../tifs/Snap-91556-Image Export-06.tif	1	TRUE	665.613
MY_irld52	d1	rep4	tifs	../tifs/Snap-91555-Image Export-05.tif	0	TRUE	753.521
MY_irld52	d1	rep4	tifs	../tifs/Snap-91554-Image Export-04.tif	0	TRUE	649.135
MY_irld52	d1	rep4	tifs	../tifs/Snap-91553-Image Export-03.tif	0	TRUE	654.758
MY_irld52	d1	rep4	tifs	../tifs/Snap-91552-Image Export-02.tif	0	TRUE	699.367
MY_irld52	d1	rep4	tifs	../tifs/Snap-91587-Image Export-37.tif	0	TRUE	728.164
MY_irld52	d1	rep4	tifs	../tifs/Snap-91587-Image Export-37.tif	2	TRUE	785.628
MY_irld52	d1	rep4	tifs	../tifs/Snap-91587-Image Export-37.tif	3	TRUE	735.358
MY_irld52	d1	rep4	tifs	../tifs/Snap-91587-Image Export-37.tif	4	TRUE	787.459
MY_irld52	d1	rep4	tifs	../tifs/Snap-91586-Image Export-36.tif	0	TRUE	757.275
MY_irld52	d1	rep4	tifs	../tifs/Snap-91586-Image Export-36.tif	1	TRUE	781.928
MY_irld52	d1	rep4	tifs	../tifs/Snap-91586-Image Export-36.tif	2	TRUE	736.338
MY_irld52	d1	rep4	tifs	../tifs/Snap-91569-Image Export-19.tif	0	TRUE	769.87
MY_irld52	d1	rep4	tifs	../tifs/Snap-91569-Image Export-19.tif	1	TRUE	845.015
MY_irld52	d1	rep4	tifs	../tifs/Snap-91569-Image Export-19.tif	2	TRUE	765.227
MY_irld52	d1	rep4	tifs	../tifs/Snap-91585-Image Export-35.tif	0	TRUE	646.545
MY_irld52	d1	rep4	tifs	../tifs/Snap-91585-Image Export-35.tif	4	TRUE	426.549
MY_irld52	d1	rep4	tifs	../tifs/Snap-91585-Image Export-35.tif	5	TRUE	650.652
MY_irld52	d1	rep4	tifs	../tifs/Snap-91585-Image Export-35.tif	6	TRUE	780.763
MY_irld52	d1	rep4	tifs	../tifs/Snap-91568-Image Export-18.tif	0	TRUE	736.246
MY_irld52	d1	rep4	tifs	../tifs/Snap-91568-Image Export-18.tif	1	TRUE	770.72
MY_irld52	d1	rep4	tifs	../tifs/Snap-91568-Image Export-18.tif	2	TRUE	781.43
MY_irld52	d1	rep4	tifs	../tifs/Snap-91568-Image Export-18.tif	3	TRUE	729.367
MY_irld52	d1	rep4	tifs	../tifs/Snap-91584-Image Export-34.tif	0	TRUE	784.203
MY_irld52	d1	rep4	tifs	../tifs/Snap-91584-Image Export-34.tif	1	TRUE	776.213
MY_irld52	d1	rep4	tifs	../tifs/Snap-91583-Image Export-33.tif	0	TRUE	846.532
MY_irld52	d1	rep4	tifs	../tifs/Snap-91583-Image Export-33.tif	1	TRUE	790.769
MY_irld52	d1	rep4	tifs	../tifs/Snap-91583-Image Export-33.tif	2	TRUE	748.657
MY_irld52	d1	rep4	tifs	../tifs/Snap-91583-Image Export-33.tif	4	TRUE	813.314
MY_irld52	d1	rep4	tifs	../tifs/Snap-91583-Image Export-33.tif	5	TRUE	807.691
MY_irld52	d1	rep4	tifs	../tifs/Snap-91582-Image Export-32.tif	0	TRUE	815.406
MY_irld52	d1	rep4	tifs	../tifs/Snap-91582-Image Export-32.tif	1	TRUE	747.14
MY_irld52	d1	rep4	tifs	../tifs/Snap-91582-Image Export-32.tif	2	TRUE	782.41
MY_irld52	d1	rep4	tifs	../tifs/Snap-91582-Image Export-32.tif	3	TRUE	830.459
MY_irld52	d1	rep4	tifs	../tifs/Snap-91582-Image Export-32.tif	5	TRUE	769.87
MY_irld52	d1	rep4	tifs	../tifs/Snap-91581-Image Export-31.tif	1	TRUE	688.603
MY_irld52	d1	rep4	tifs	../tifs/Snap-91581-Image Export-31.tif	2	TRUE	542.955
MY_irld52	d1	rep4	tifs	../tifs/Snap-91581-Image Export-31.tif	3	TRUE	770.498
MY_irld52	d1	rep4	tifs	../tifs/Snap-91580-Image Export-30.tif	1	TRUE	746.029
MY_irld52	d1	rep4	tifs	../tifs/Snap-91580-Image Export-30.tif	2	TRUE	783.667
MY_irld52	d1	rep4	tifs	../tifs/Snap-91577-Image Export-27.tif	0	TRUE	847.696
MY_irld52	d1	rep4	tifs	../tifs/Snap-91577-Image Export-27.tif	1	TRUE	710.797
MY_irld52	d1	rep4	tifs	../tifs/Snap-91577-Image Export-27.tif	2	TRUE	740.13
MY_irld52	d1	rep4	tifs	../tifs/Snap-91591-Image Export-41.tif	0	TRUE	790.547
MY_irld52	d1	rep4	tifs	../tifs/Snap-91591-Image Export-41.tif	1	TRUE	788.754
MY_irld52	d1	rep4	tifs	../tifs/Snap-91591-Image Export-41.tif	2	TRUE	752.005
MY_irld52	d1	rep4	tifs	../tifs/Snap-91590-Image Export-40.tif	2	TRUE	852.431
MY_irld52	d1	rep4	tifs	../tifs/Snap-91590-Image Export-40.tif	3	TRUE	818.623
MY_irld52	d1	rep4	tifs	../tifs/Snap-91590-Image Export-40.tif	4	TRUE	799.295
MY_irld52	d1	rep4	tifs	../tifs/Snap-91590-Image Export-40.tif	6	TRUE	829.701
MY_irld52	d1	rep4	tifs	../tifs/Snap-91590-Image Export-40.tif	8	TRUE	814.295
MY_irld52	d1	rep4	tifs	../tifs/Snap-91576-Image Export-26.tif	3	TRUE	585.235
MY_irld52	d1	rep4	tifs	../tifs/Snap-91576-Image Export-26.tif	4	TRUE	756.425
MY_irld52	d1	rep4	tifs	../tifs/Snap-91575-Image Export-25.tif	1	TRUE	767.188
MY_irld52	d1	rep4	tifs	../tifs/Snap-91575-Image Export-25.tif	5	TRUE	707.043
MY_irld52	d1	rep4	tifs	../tifs/Snap-91593-Image Export-43.tif	1	TRUE	725.261
MY_irld52	d1	rep4	tifs	../tifs/Snap-91593-Image Export-43.tif	2	TRUE	687.845
MY_irld52	d1	rep4	tifs	../tifs/Snap-91593-Image Export-43.tif	3	TRUE	738.391
MY_irld52	d1	rep4	tifs	../tifs/Snap-91574-Image Export-24.tif	0	TRUE	734.323
MY_irld52	d1	rep4	tifs	../tifs/Snap-91574-Image Export-24.tif	1	TRUE	729.995
MY_irld52	d1	rep4	tifs	../tifs/Snap-91574-Image Export-24.tif	2	TRUE	760.807
MY_irld52	d1	rep4	tifs	../tifs/Snap-91595-Image Export-45.tif	0	TRUE	827.02
MY_irld52	d1	rep4	tifs	../tifs/Snap-91573-Image Export-23.tif	0	TRUE	768.483
MY_irld52	d1	rep4	tifs	../tifs/Snap-91572-Image Export-22.tif	0	TRUE	736.376
MY_irld52	d1	rep4	tifs	../tifs/Snap-91594-Image Export-44.tif	0	TRUE	718.565
MY_irld52	d1	rep4	tifs	../tifs/Snap-91571-Image Export-21.tif	2	TRUE	783.575
MY_irld52	d1	rep4	tifs	../tifs/Snap-91571-Image Export-21.tif	3	TRUE	771.256
MY_irld52	d1	rep4	tifs	../tifs/Snap-91570-Image Export-20.tif	0	TRUE	693.69
MY_irld52	d1	rep4	tifs	../tifs/Snap-91570-Image Export-20.tif	2	TRUE	752.503
MY_irld52	d1	rep4	tifs	../tifs/Snap-91558-Image Export-08.tif	0	TRUE	623.908
MY_irld52	d1	rep4	tifs	../tifs/Snap-91558-Image Export-08.tif	1	TRUE	683.425
MY_irld52	d1	rep4	tifs	../tifs/Snap-91559-Image Export-09.tif	0	TRUE	776.695
MY_irld52	d1	rep4	tifs	../tifs/Snap-91559-Image Export-09.tif	1	TRUE	821.711
MY_irld52	d1	rep4	tifs	../tifs/Snap-91559-Image Export-09.tif	2	TRUE	797.816
MY_irld52	d1	rep4	tifs	../tifs/Snap-91566-Image Export-16.tif	1	TRUE	772.589
MY_irld52	d1	rep4	tifs	../tifs/Snap-91567-Image Export-17.tif	1	TRUE	788.846
MY_irld52	d1	rep4	tifs	../tifs/Snap-91567-Image Export-17.tif	2	TRUE	701.42
MY_irld52	d1	rep4	tifs	../tifs/Snap-91567-Image Export-17.tif	3	TRUE	739.188
MY_irld52	d1	rep4	tifs	../tifs/Snap-91588-Image Export-38.tif	0	TRUE	779.063
MY_irld52	d1	rep4	tifs	../tifs/Snap-91588-Image Export-38.tif	1	TRUE	785.59
MY_irld52	d1	rep4	tifs	../tifs/Snap-91588-Image Export-38.tif	2	TRUE	749.637
MY_irld52	d1	rep4	tifs	../tifs/Snap-91588-Image Export-38.tif	4	TRUE	850.822
MY_irld52	d1	rep4	tifs	../tifs/Snap-91564-Image Export-14.tif	0	TRUE	788.179
MY_irld52	d1	rep4	tifs	../tifs/Snap-91564-Image Export-14.tif	1	TRUE	651.632
MY_irld52	d1	rep4	tifs	../tifs/Snap-91589-Image Export-39.tif	1	TRUE	770
MY_irld52	d1	rep4	tifs	../tifs/Snap-91589-Image Export-39.tif	2	TRUE	786.923
MY_irld52	d1	rep4	tifs	../tifs/Snap-91589-Image Export-39.tif	4	TRUE	747.99
MY_irld52	d1	rep4	tifs	../tifs/Snap-91565-Image Export-15.tif	0	TRUE	756.073
MY_irld52	d1	rep4	tifs	../tifs/Snap-91565-Image Export-15.tif	1	TRUE	795.411
MY_irld52	d1	rep4	tifs	../tifs/Snap-91562-Image Export-12.tif	0	TRUE	808.358
MY_irld52	d1	rep4	tifs	../tifs/Snap-91562-Image Export-12.tif	1	TRUE	780.671
MY_irld52	d1	rep4	tifs	../tifs/Snap-91563-Image Export-13.tif	0	TRUE	751.338
MY_irld52	d1	rep4	tifs	../tifs/Snap-91563-Image Export-13.tif	1	TRUE	795.319
MY_irld52	d1	rep4	tifs	../tifs/Snap-91560-Image Export-10.tif	1	TRUE	796.836
MY_irld52	d1	rep4	tifs	../tifs/Snap-91560-Image Export-10.tif	3	TRUE	886.407
MY_irld52	d1	rep4	tifs	../tifs/Snap-91561-Image Export-11.tif	1	TRUE	766.966
MY_irld52	d1	rep4	tifs	../tifs/Snap-91561-Image Export-11.tif	2	TRUE	743.792
MY_irld52	d1	rep4	tifs	../tifs/Snap-91578-Image Export-28.tif	0	TRUE	817.605
MY_irld52	d1	rep4	tifs	../tifs/Snap-91578-Image Export-28.tif	1	TRUE	757.996
MY_irld52	d1	rep4	tifs	../tifs/Snap-91578-Image Export-28.tif	2	TRUE	710.391
MY_irld52	d1	rep4	tifs	../tifs/Snap-91578-Image Export-28.tif	3	TRUE	794.469
MY_irld52	d1	rep4	tifs	../tifs/Snap-91579-Image Export-29.tif	0	TRUE	809.561
MY_irld52	d1	rep4	tifs	../tifs/Snap-91579-Image Export-29.tif	1	TRUE	653.111
MY_irld52	d1	rep4	tifs	../tifs/Snap-91579-Image Export-29.tif	2	TRUE	796.614
N2_irld52	d1	rep4	tifs	../tifs/Snap-91528-Image Export-18.tif	1	TRUE	824.43
N2_irld52	d1	rep4	tifs	../tifs/Snap-91528-Image Export-18.tif	2	TRUE	777.73
N2_irld52	d1	rep4	tifs	../tifs/Snap-91528-Image Export-18.tif	3	TRUE	799.647
N2_irld52	d1	rep4	tifs	../tifs/Snap-91528-Image Export-18.tif	6	TRUE	804.16
N2_irld52	d1	rep4	tifs	../tifs/Snap-91529-Image Export-19.tif	1	TRUE	807.599
N2_irld52	d1	rep4	tifs	../tifs/Snap-91529-Image Export-19.tif	2	TRUE	831.532
N2_irld52	d1	rep4	tifs	../tifs/Snap-91529-Image Export-19.tif	3	TRUE	780.986
N2_irld52	d1	rep4	tifs	../tifs/Snap-91529-Image Export-19.tif	4	TRUE	831.662
N2_irld52	d1	rep4	tifs	../tifs/Snap-91529-Image Export-19.tif	7	TRUE	796.3
N2_irld52	d1	rep4	tifs	../tifs/Snap-91530-Image Export-20.tif	0	TRUE	798.759
N2_irld52	d1	rep4	tifs	../tifs/Snap-91530-Image Export-20.tif	1	TRUE	774.198
N2_irld52	d1	rep4	tifs	../tifs/Snap-91531-Image Export-21.tif	0	TRUE	757.367
N2_irld52	d1	rep4	tifs	../tifs/Snap-91531-Image Export-21.tif	3	TRUE	808.894
N2_irld52	d1	rep4	tifs	../tifs/Snap-91531-Image Export-21.tif	5	TRUE	727.183
N2_irld52	d1	rep4	tifs	../tifs/Snap-91549-Image Export-39.tif	0	TRUE	798.092
N2_irld52	d1	rep4	tifs	../tifs/Snap-91549-Image Export-39.tif	1	TRUE	834.251
N2_irld52	d1	rep4	tifs	../tifs/Snap-91532-Image Export-22.tif	0	TRUE	820.324
N2_irld52	d1	rep4	tifs	../tifs/Snap-91532-Image Export-22.tif	4	TRUE	796.077
N2_irld52	d1	rep4	tifs	../tifs/Snap-91532-Image Export-22.tif	6	TRUE	750.802
N2_irld52	d1	rep4	tifs	../tifs/Snap-91532-Image Export-22.tif	7	TRUE	856.537
N2_irld52	d1	rep4	tifs	../tifs/Snap-91548-Image Export-38.tif	0	TRUE	792.101
N2_irld52	d1	rep4	tifs	../tifs/Snap-91548-Image Export-38.tif	1	TRUE	796.262
N2_irld52	d1	rep4	tifs	../tifs/Snap-91533-Image Export-23.tif	1	TRUE	826.575
N2_irld52	d1	rep4	tifs	../tifs/Snap-91533-Image Export-23.tif	3	TRUE	812.778
N2_irld52	d1	rep4	tifs	../tifs/Snap-91533-Image Export-23.tif	4	TRUE	801.792
N2_irld52	d1	rep4	tifs	../tifs/Snap-91534-Image Export-24.tif	0	TRUE	898.909
N2_irld52	d1	rep4	tifs	../tifs/Snap-91536-Image Export-26.tif	0	TRUE	809.561
N2_irld52	d1	rep4	tifs	../tifs/Snap-91536-Image Export-26.tif	3	TRUE	809.116
N2_irld52	d1	rep4	tifs	../tifs/Snap-91536-Image Export-26.tif	4	TRUE	780.855
N2_irld52	d1	rep4	tifs	../tifs/Snap-91536-Image Export-26.tif	5	TRUE	760.493
N2_irld52	d1	rep4	tifs	../tifs/Snap-91511-Image Export-01.tif	0	TRUE	775.401
N2_irld52	d1	rep4	tifs	../tifs/Snap-91511-Image Export-01.tif	1	TRUE	850.416
N2_irld52	d1	rep4	tifs	../tifs/Snap-91511-Image Export-01.tif	2	TRUE	801.884
N2_irld52	d1	rep4	tifs	../tifs/Snap-91512-Image Export-02.tif	0	TRUE	783.353
N2_irld52	d1	rep4	tifs	../tifs/Snap-91512-Image Export-02.tif	1	TRUE	824.116
N2_irld52	d1	rep4	tifs	../tifs/Snap-91514-Image Export-04.tif	1	TRUE	722.135
N2_irld52	d1	rep4	tifs	../tifs/Snap-91514-Image Export-04.tif	2	TRUE	848.677
N2_irld52	d1	rep4	tifs	../tifs/Snap-91514-Image Export-04.tif	3	TRUE	811.484
N2_irld52	d1	rep4	tifs	../tifs/Snap-91515-Image Export-05.tif	1	TRUE	836.082
N2_irld52	d1	rep4	tifs	../tifs/Snap-91515-Image Export-05.tif	2	TRUE	488.839
N2_irld52	d1	rep4	tifs	../tifs/Snap-91515-Image Export-05.tif	4	TRUE	890.069
N2_irld52	d1	rep4	tifs	../tifs/Snap-91515-Image Export-05.tif	6	TRUE	784.333
N2_irld52	d1	rep4	tifs	../tifs/Snap-91516-Image Export-06.tif	0	TRUE	761.323
N2_irld52	d1	rep4	tifs	../tifs/Snap-91516-Image Export-06.tif	1	TRUE	786.793
N2_irld52	d1	rep4	tifs	../tifs/Snap-91517-Image Export-07.tif	0	TRUE	808.764
N2_irld52	d1	rep4	tifs	../tifs/Snap-91517-Image Export-07.tif	1	TRUE	835.01
N2_irld52	d1	rep4	tifs	../tifs/Snap-91517-Image Export-07.tif	2	TRUE	814.517
N2_irld52	d1	rep4	tifs	../tifs/Snap-91550-Image Export-40.tif	1	TRUE	857.61
N2_irld52	d1	rep4	tifs	../tifs/Snap-91550-Image Export-40.tif	2	TRUE	793.044
N2_irld52	d1	rep4	tifs	../tifs/Snap-91521-Image Export-11.tif	0	TRUE	792.155
N2_irld52	d1	rep4	tifs	../tifs/Snap-91521-Image Export-11.tif	1	TRUE	851.803
N2_irld52	d1	rep4	tifs	../tifs/Snap-91520-Image Export-10.tif	0	TRUE	821.267
N2_irld52	d1	rep4	tifs	../tifs/Snap-91523-Image Export-13.tif	0	TRUE	835.194
N2_irld52	d1	rep4	tifs	../tifs/Snap-91522-Image Export-12.tif	0	TRUE	790.585
N2_irld52	d1	rep4	tifs	../tifs/Snap-91522-Image Export-12.tif	1	TRUE	784.203
N2_irld52	d1	rep4	tifs	../tifs/Snap-91522-Image Export-12.tif	2	TRUE	816.126
N2_irld52	d1	rep4	tifs	../tifs/Snap-91525-Image Export-15.tif	2	TRUE	747.638
N2_irld52	d1	rep4	tifs	../tifs/Snap-91525-Image Export-15.tif	3	TRUE	737.097
N2_irld52	d1	rep4	tifs	../tifs/Snap-91525-Image Export-15.tif	4	TRUE	840.779
N2_irld52	d1	rep4	tifs	../tifs/Snap-91525-Image Export-15.tif	5	TRUE	814.701
N2_irld52	d1	rep4	tifs	../tifs/Snap-91525-Image Export-15.tif	6	TRUE	792.952
N2_irld52	d1	rep4	tifs	../tifs/Snap-91524-Image Export-14.tif	0	TRUE	809.653
N2_irld52	d1	rep4	tifs	../tifs/Snap-91524-Image Export-14.tif	1	TRUE	839.484
N2_irld52	d1	rep4	tifs	../tifs/Snap-91527-Image Export-17.tif	0	TRUE	771.387
N2_irld52	d1	rep4	tifs	../tifs/Snap-91527-Image Export-17.tif	1	TRUE	789.734
N2_irld52	d1	rep4	tifs	../tifs/Snap-91527-Image Export-17.tif	2	TRUE	788.217
N2_irld52	d1	rep4	tifs	../tifs/Snap-91526-Image Export-16.tif	0	TRUE	843.942
N2_irld52	d1	rep4	tifs	../tifs/Snap-91526-Image Export-16.tif	1	TRUE	709.594
N2_irld52	d1	rep4	tifs	../tifs/Snap-91526-Image Export-16.tif	3	TRUE	669.313
N2_irld52	d1	rep4	tifs	../tifs/Snap-91547-Image Export-37.tif	0	TRUE	817.198
N2_irld52	d1	rep4	tifs	../tifs/Snap-91544-Image Export-34.tif	1	TRUE	845.865
N2_irld52	d1	rep4	tifs	../tifs/Snap-91544-Image Export-34.tif	2	TRUE	841.169
N2_irld52	d1	rep4	tifs	../tifs/Snap-91544-Image Export-34.tif	3	TRUE	799.831
N2_irld52	d1	rep4	tifs	../tifs/Snap-91545-Image Export-35.tif	0	TRUE	832.512
N2_irld52	d1	rep4	tifs	../tifs/Snap-91542-Image Export-32.tif	1	TRUE	839.3
N2_irld52	d1	rep4	tifs	../tifs/Snap-91542-Image Export-32.tif	2	TRUE	775.048
N2_irld52	d1	rep4	tifs	../tifs/Snap-91542-Image Export-32.tif	4	TRUE	863.141
N2_irld52	d1	rep4	tifs	../tifs/Snap-91542-Image Export-32.tif	5	TRUE	787.995
N2_irld52	d1	rep4	tifs	../tifs/Snap-91542-Image Export-32.tif	6	TRUE	829.479
N2_irld52	d1	rep4	tifs	../tifs/Snap-91542-Image Export-32.tif	7	TRUE	692.71
N2_irld52	d1	rep4	tifs	../tifs/Snap-91542-Image Export-32.tif	8	TRUE	841.575
N2_irld52	d1	rep4	tifs	../tifs/Snap-91543-Image Export-33.tif	4	TRUE	846.088
N2_irld52	d1	rep4	tifs	../tifs/Snap-91543-Image Export-33.tif	5	TRUE	853.097
N2_irld52	d1	rep4	tifs	../tifs/Snap-91543-Image Export-33.tif	10	TRUE	838.986
N2_irld52	d1	rep4	tifs	../tifs/Snap-91543-Image Export-33.tif	11	TRUE	821.619
N2_irld52	d1	rep4	tifs	../tifs/Snap-91538-Image Export-28.tif	0	TRUE	861.938
N2_irld52	d1	rep4	tifs	../tifs/Snap-91540-Image Export-30.tif	0	TRUE	865.914
N2_irld52	d1	rep4	tifs	../tifs/Snap-91540-Image Export-30.tif	2	TRUE	870.648
N2_irld52	d1	rep4	tifs	../tifs/Snap-91540-Image Export-30.tif	3	TRUE	794.561
N2_irld52	d1	rep4	tifs	../tifs/Snap-91540-Image Export-30.tif	4	TRUE	842.204
N2_irld52	d1	rep4	tifs	../tifs/Snap-91540-Image Export-30.tif	5	TRUE	813
N2_irld52	d1	rep4	tifs	../tifs/Snap-91540-Image Export-30.tif	6	TRUE	810.725
N2_irld52	d1	rep4	tifs	../tifs/Snap-91540-Image Export-30.tif	8	TRUE	842.87
N2_irld52	d1	rep4	tifs	../tifs/Snap-91541-Image Export-31.tif	0	TRUE	845.865
N2_irld52	d1	rep4	tifs	../tifs/Snap-91541-Image Export-31.tif	3	TRUE	814.923
N2_irld52	d1	rep4	tifs	../tifs/Snap-91541-Image Export-31.tif	5	TRUE	848.677
N2_irld52	d1	rep4	tifs	../tifs/Snap-91541-Image Export-31.tif	8	TRUE	802.551
N2_irld52	d1	rep4	tifs	../tifs/Snap-91519-Image Export-09.tif	0	TRUE	766.744
N2_irld52	d1	rep4	tifs	../tifs/Snap-91519-Image Export-09.tif	1	TRUE	820.546
N2_irld52	d1	rep4	tifs	../tifs/Snap-91518-Image Export-08.tif	0	TRUE	783.353
N2_irld52	d1	rep4	tifs	../tifs/Snap-91518-Image Export-08.tif	1	TRUE	806.749
N2_irld52	d1	rep4	tifs	../tifs/Snap-91518-Image Export-08.tif	2	TRUE	798.667
MY2147	d1	rep4	tifs	../tifs/Snap-91444-Image Export-18.tif	0	TRUE	761.029
MY2147	d1	rep4	tifs	../tifs/Snap-91444-Image Export-18.tif	1	TRUE	775.179
MY2147	d1	rep4	tifs	../tifs/Snap-91438-Image Export-12.tif	0	TRUE	721.561
MY2147	d1	rep4	tifs	../tifs/Snap-91438-Image Export-12.tif	1	TRUE	757.497
MY2147	d1	rep4	tifs	../tifs/Snap-91445-Image Export-19.tif	0	TRUE	761.029
MY2147	d1	rep4	tifs	../tifs/Snap-91445-Image Export-19.tif	1	TRUE	775.179
MY2147	d1	rep4	tifs	../tifs/Snap-91439-Image Export-13.tif	0	TRUE	779.691
MY2147	d1	rep4	tifs	../tifs/Snap-91439-Image Export-13.tif	3	TRUE	784.648
MY2147	d1	rep4	tifs	../tifs/Snap-91427-Image Export-01.tif	0	TRUE	765.449
MY2147	d1	rep4	tifs	../tifs/Snap-91446-Image Export-20.tif	0	TRUE	820.454
MY2147	d1	rep4	tifs	../tifs/Snap-91447-Image Export-21.tif	0	TRUE	776.251
MY2147	d1	rep4	tifs	../tifs/Snap-91431-Image Export-05.tif	0	TRUE	792.73
MY2147	d1	rep4	tifs	../tifs/Snap-91430-Image Export-04.tif	1	TRUE	785.942
MY2147	d1	rep4	tifs	../tifs/Snap-91430-Image Export-04.tif	2	TRUE	850.194
MY2147	d1	rep4	tifs	../tifs/Snap-91432-Image Export-06.tif	0	TRUE	782.909
MY2147	d1	rep4	tifs	../tifs/Snap-91448-Image Export-22.tif	0	TRUE	775.179
MY2147	d1	rep4	tifs	../tifs/Snap-91428-Image Export-02.tif	0	TRUE	808.044
MY2147	d1	rep4	tifs	../tifs/Snap-91428-Image Export-02.tif	2	TRUE	790.991
MY2147	d1	rep4	tifs	../tifs/Snap-91429-Image Export-03.tif	1	TRUE	775.807
MY2147	d1	rep4	tifs	../tifs/Snap-91429-Image Export-03.tif	2	TRUE	727.72
MY2147	d1	rep4	tifs	../tifs/Snap-91452-Image Export-26.tif	0	TRUE	787.421
MY2147	d1	rep4	tifs	../tifs/Snap-91452-Image Export-26.tif	1	TRUE	767.947
MY2147	d1	rep4	tifs	../tifs/Snap-91437-Image Export-11.tif	0	TRUE	783.797
MY2147	d1	rep4	tifs	../tifs/Snap-91437-Image Export-11.tif	1	TRUE	729.995
MY2147	d1	rep4	tifs	../tifs/Snap-91450-Image Export-24.tif	2	TRUE	803.179
MY2147	d1	rep4	tifs	../tifs/Snap-91450-Image Export-24.tif	3	TRUE	800.942
MY2147	d1	rep4	tifs	../tifs/Snap-91436-Image Export-10.tif	0	TRUE	790.232
MY2147	d1	rep4	tifs	../tifs/Snap-91451-Image Export-25.tif	0	TRUE	825.189
MY2147	d1	rep4	tifs	../tifs/Snap-91435-Image Export-09.tif	0	TRUE	783.445
MY2147	d1	rep4	tifs	../tifs/Snap-91435-Image Export-09.tif	1	TRUE	738.077
MY2147	d1	rep4	tifs	../tifs/Snap-91443-Image Export-17.tif	0	TRUE	755.314
MY2147	d1	rep4	tifs	../tifs/Snap-91442-Image Export-16.tif	0	TRUE	705.618
MY2147	d1	rep4	tifs	../tifs/Snap-91442-Image Export-16.tif	1	TRUE	677.043
MY2147	d1	rep4	tifs	../tifs/Snap-91441-Image Export-15.tif	0	TRUE	651.724
N2	d1	rep4	tifs	../tifs/Snap-91410-Image Export-08.tif	2	TRUE	761.88
N2	d1	rep4	tifs	../tifs/Snap-91410-Image Export-08.tif	5	TRUE	778.933
N2	d1	rep4	tifs	../tifs/Snap-91410-Image Export-08.tif	6	TRUE	852.247
N2	d1	rep4	tifs	../tifs/Snap-91410-Image Export-08.tif	7	TRUE	782.464
N2	d1	rep4	tifs	../tifs/Snap-91406-Image Export-04.tif	0	TRUE	849.972
N2	d1	rep4	tifs	../tifs/Snap-91406-Image Export-04.tif	2	TRUE	823.672
N2	d1	rep4	tifs	../tifs/Snap-91406-Image Export-04.tif	5	TRUE	791.841
N2	d1	rep4	tifs	../tifs/Snap-91406-Image Export-04.tif	6	TRUE	853.227
N2	d1	rep4	tifs	../tifs/Snap-91403-Image Export-01.tif	0	TRUE	777.638
N2	d1	rep4	tifs	../tifs/Snap-91418-Image Export-16.tif	0	TRUE	753.169
N2	d1	rep4	tifs	../tifs/Snap-91418-Image Export-16.tif	2	TRUE	739.15
N2	d1	rep4	tifs	../tifs/Snap-91419-Image Export-17.tif	0	TRUE	799.831
N2	d1	rep4	tifs	../tifs/Snap-91419-Image Export-17.tif	1	TRUE	813.222
N2	d1	rep4	tifs	../tifs/Snap-91404-Image Export-02.tif	2	TRUE	837.339
N2	d1	rep4	tifs	../tifs/Snap-91404-Image Export-02.tif	4	TRUE	874.662
N2	d1	rep4	tifs	../tifs/Snap-91404-Image Export-02.tif	5	TRUE	838.672
N2	d1	rep4	tifs	../tifs/Snap-91404-Image Export-02.tif	6	TRUE	796.614
N2	d1	rep4	tifs	../tifs/Snap-91404-Image Export-02.tif	7	TRUE	785.314
N2	d1	rep4	tifs	../tifs/Snap-91404-Image Export-02.tif	8	TRUE	814.739
N2	d1	rep4	tifs	../tifs/Snap-91404-Image Export-02.tif	9	TRUE	840.373
N2	d1	rep4	tifs	../tifs/Snap-91405-Image Export-03.tif	1	TRUE	822.377
N2	d1	rep4	tifs	../tifs/Snap-91405-Image Export-03.tif	2	TRUE	785.72
N2	d1	rep4	tifs	../tifs/Snap-91405-Image Export-03.tif	3	TRUE	774.198
N2	d1	rep4	tifs	../tifs/Snap-91405-Image Export-03.tif	4	TRUE	751.338
N2	d1	rep4	tifs	../tifs/Snap-91405-Image Export-03.tif	5	TRUE	791.879
N2	d1	rep4	tifs	../tifs/Snap-91405-Image Export-03.tif	7	TRUE	791.343
N2	d1	rep4	tifs	../tifs/Snap-91405-Image Export-03.tif	8	TRUE	811.169
N2	d1	rep4	tifs	../tifs/Snap-91405-Image Export-03.tif	10	TRUE	780.763
N2	d1	rep4	tifs	../tifs/Snap-91405-Image Export-03.tif	11	TRUE	800.276
N2	d1	rep4	tifs	../tifs/Snap-91405-Image Export-03.tif	12	TRUE	838.227
N2	d1	rep4	tifs	../tifs/Snap-91405-Image Export-03.tif	14	TRUE	821.933
N2	d1	rep4	tifs	../tifs/Snap-91405-Image Export-03.tif	15	TRUE	782.502
N2	d1	rep4	tifs	../tifs/Snap-91405-Image Export-03.tif	16	TRUE	819.121
N2	d1	rep4	tifs	../tifs/Snap-91424-Image Export-22.tif	0	TRUE	779.377
N2	d1	rep4	tifs	../tifs/Snap-91424-Image Export-22.tif	1	TRUE	802.513
N2	d1	rep4	tifs	../tifs/Snap-91425-Image Export-23.tif	0	TRUE	815.498
N2	d1	rep4	tifs	../tifs/Snap-91425-Image Export-23.tif	2	TRUE	749.729
N2	d1	rep4	tifs	../tifs/Snap-91425-Image Export-23.tif	3	TRUE	804.566
N2	d1	rep4	tifs	../tifs/Snap-91414-Image Export-12.tif	2	TRUE	784.555
N2	d1	rep4	tifs	../tifs/Snap-91414-Image Export-12.tif	3	TRUE	802.107
N2	d1	rep4	tifs	../tifs/Snap-91415-Image Export-13.tif	0	TRUE	808.764
N2	d1	rep4	tifs	../tifs/Snap-91415-Image Export-13.tif	1	TRUE	840.557
N2	d1	rep4	tifs	../tifs/Snap-91420-Image Export-18.tif	0	TRUE	830.145
N2	d1	rep4	tifs	../tifs/Snap-91420-Image Export-18.tif	1	TRUE	760.715
N2	d1	rep4	tifs	../tifs/Snap-91420-Image Export-18.tif	2	TRUE	706.062
N2	d1	rep4	tifs	../tifs/Snap-91420-Image Export-18.tif	3	TRUE	802.421
N2	d1	rep4	tifs	../tifs/Snap-91420-Image Export-18.tif	5	TRUE	814.701
N2	d1	rep4	tifs	../tifs/Snap-91426-Image Export-24.tif	0	TRUE	781.522
N2	d1	rep4	tifs	../tifs/Snap-91426-Image Export-24.tif	1	TRUE	772.903
N2	d1	rep4	tifs	../tifs/Snap-91426-Image Export-24.tif	2	TRUE	874.126
N2	d1	rep4	tifs	../tifs/Snap-91417-Image Export-15.tif	1	TRUE	797.816
N2	d1	rep4	tifs	../tifs/Snap-91417-Image Export-15.tif	2	TRUE	798.759
N2	d1	rep4	tifs	../tifs/Snap-91417-Image Export-15.tif	3	TRUE	787.015
N2	d1	rep4	tifs	../tifs/Snap-91416-Image Export-14.tif	0	TRUE	811.077
N2	d1	rep4	tifs	../tifs/Snap-91416-Image Export-14.tif	1	TRUE	775.363
N2	d1	rep4	tifs	../tifs/Snap-91423-Image Export-21.tif	0	TRUE	855.15
N2	d1	rep4	tifs	../tifs/Snap-91422-Image Export-20.tif	2	TRUE	824.744
N2	d1	rep4	tifs	../tifs/Snap-91422-Image Export-20.tif	3	TRUE	855.112
N2	d1	rep4	tifs	../tifs/Snap-91413-Image Export-11.tif	3	TRUE	838.856
N2	d1	rep4	tifs	../tifs/Snap-91413-Image Export-11.tif	4	TRUE	783.223
N2	d1	rep4	tifs	../tifs/Snap-91413-Image Export-11.tif	5	TRUE	754.908
N2	d1	rep4	tifs	../tifs/Snap-91408-Image Export-06.tif	2	TRUE	703.565
N2	d1	rep4	tifs	../tifs/Snap-91408-Image Export-06.tif	3	TRUE	837.247
N2	d1	rep4	tifs	../tifs/Snap-91412-Image Export-10.tif	0	TRUE	810.189
N2	d1	rep4	tifs	../tifs/Snap-91412-Image Export-10.tif	2	TRUE	811.039
N2	d1	rep4	tifs	../tifs/Snap-91412-Image Export-10.tif	3	TRUE	812.87
N2	d1	rep4	tifs	../tifs/Snap-91412-Image Export-10.tif	4	TRUE	748.343
N2	d1	rep4	tifs	../tifs/Snap-91409-Image Export-07.tif	0	TRUE	803.846
N2	d1	rep4	tifs	../tifs/Snap-91409-Image Export-07.tif	1	TRUE	758.44
N2	d1	rep4	tifs	../tifs/Snap-91409-Image Export-07.tif	2	TRUE	827.648
N2	d8	rep3	tifs	../tifs/Snap-92175-Image Export-24.tif	0	TRUE	616.27
N2	d8	rep3	tifs	../tifs/Snap-92175-Image Export-24.tif	1	TRUE	606.356
N2	d8	rep3	tifs	../tifs/Snap-92184-Image Export-33.tif	0	TRUE	664.357
N2	d8	rep3	tifs	../tifs/Snap-92191-Image Export-40.tif	0	TRUE	576.487
N2	d8	rep3	tifs	../tifs/Snap-92158-Image Export-07.tif	0	TRUE	684.183
N2	d8	rep3	tifs	../tifs/Snap-92158-Image Export-07.tif	1	TRUE	624.13
N2	d8	rep3	tifs	../tifs/Snap-92158-Image Export-07.tif	2	TRUE	631.99
N2	d8	rep3	tifs	../tifs/Snap-92176-Image Export-25.tif	0	TRUE	671.681
N2	d8	rep3	tifs	../tifs/Snap-92171-Image Export-20.tif	0	TRUE	629.4
N2	d8	rep3	tifs	../tifs/Snap-92171-Image Export-20.tif	1	TRUE	672.309
N2	d8	rep3	tifs	../tifs/Snap-92171-Image Export-20.tif	2	TRUE	620.69
N2	d8	rep3	tifs	../tifs/Snap-92173-Image Export-22.tif	0	TRUE	675.12
N2	d8	rep3	tifs	../tifs/Snap-92185-Image Export-34.tif	0	TRUE	692.894
N2	d8	rep3	tifs	../tifs/Snap-92182-Image Export-31.tif	2	TRUE	661.193
N2	d8	rep3	tifs	../tifs/Snap-92182-Image Export-31.tif	3	TRUE	623.908
N2	d8	rep3	tifs	../tifs/Snap-92174-Image Export-23.tif	1	TRUE	618.193
N2	d8	rep3	tifs	../tifs/Snap-92187-Image Export-36.tif	0	TRUE	597.83
N2	d8	rep3	tifs	../tifs/Snap-92170-Image Export-19.tif	0	TRUE	691.193
N2	d8	rep3	tifs	../tifs/Snap-92170-Image Export-19.tif	1	TRUE	614.883
N2	d8	rep3	tifs	../tifs/Snap-92186-Image Export-35.tif	0	TRUE	614.975
N2	d8	rep3	tifs	../tifs/Snap-92181-Image Export-30.tif	2	TRUE	528.53
N2	d8	rep3	tifs	../tifs/Snap-92181-Image Export-30.tif	3	TRUE	567.776
N2	d8	rep3	tifs	../tifs/Snap-92160-Image Export-09.tif	1	TRUE	621.448
N2	d8	rep3	tifs	../tifs/Snap-92160-Image Export-09.tif	2	TRUE	606.893
N2	d8	rep3	tifs	../tifs/Snap-92188-Image Export-37.tif	0	TRUE	653.463
N2	d8	rep3	tifs	../tifs/Snap-92188-Image Export-37.tif	1	TRUE	480.979
N2	d8	rep3	tifs	../tifs/Snap-92157-Image Export-06.tif	0	TRUE	629.623
N2	d8	rep3	tifs	../tifs/Snap-92157-Image Export-06.tif	1	TRUE	636.318
N2	d8	rep3	tifs	../tifs/Snap-92178-Image Export-27.tif	1	TRUE	593.946
N2	d8	rep3	tifs	../tifs/Snap-92178-Image Export-27.tif	2	TRUE	604.618
N2	d8	rep3	tifs	../tifs/Snap-92153-Image Export-02.tif	2	TRUE	662.082
N2	d8	rep3	tifs	../tifs/Snap-92153-Image Export-02.tif	3	TRUE	622.207
N2	d8	rep3	tifs	../tifs/Snap-92153-Image Export-02.tif	4	TRUE	506.114
N2	d8	rep3	tifs	../tifs/Snap-92153-Image Export-02.tif	5	TRUE	646.676
N2	d8	rep3	tifs	../tifs/Snap-92153-Image Export-02.tif	6	TRUE	663.598
N2	d8	rep3	tifs	../tifs/Snap-92164-Image Export-13.tif	1	TRUE	592.467
N2	d8	rep3	tifs	../tifs/Snap-92164-Image Export-13.tif	2	TRUE	722.671
N2	d8	rep3	tifs	../tifs/Snap-92164-Image Export-13.tif	3	TRUE	493.259
N2	d8	rep3	tifs	../tifs/Snap-92164-Image Export-13.tif	5	TRUE	594.39
N2	d8	rep3	tifs	../tifs/Snap-92179-Image Export-28.tif	0	TRUE	659.584
N2	d8	rep3	tifs	../tifs/Snap-92162-Image Export-11.tif	0	TRUE	613.588
N2	d8	rep3	tifs	../tifs/Snap-92162-Image Export-11.tif	1	TRUE	642.347
N2	d8	rep3	tifs	../tifs/Snap-92165-Image Export-14.tif	0	TRUE	662.082
N2	d8	rep3	tifs	../tifs/Snap-92165-Image Export-14.tif	1	TRUE	625.555
N2	d8	rep3	tifs	../tifs/Snap-92165-Image Export-14.tif	2	TRUE	660.028
N2	d8	rep3	tifs	../tifs/Snap-92167-Image Export-16.tif	0	TRUE	583.182
N2	d8	rep3	tifs	../tifs/Snap-92167-Image Export-16.tif	1	TRUE	614.975
N2	d8	rep3	tifs	../tifs/Snap-92167-Image Export-16.tif	2	TRUE	634.395
N2	d8	rep3	tifs	../tifs/Snap-92167-Image Export-16.tif	3	TRUE	722.541
N2	d8	rep3	tifs	../tifs/Snap-92167-Image Export-16.tif	4	TRUE	604.84
N2	d8	rep3	tifs	../tifs/Snap-92167-Image Export-16.tif	6	TRUE	699.367
N2	d8	rep3	tifs	../tifs/Snap-92190-Image Export-39.tif	0	TRUE	645.787
N2	d8	rep3	tifs	../tifs/Snap-92190-Image Export-39.tif	3	TRUE	499.511
N2	d8	rep3	tifs	../tifs/Snap-92190-Image Export-39.tif	4	TRUE	660.787
N2	d8	rep3	tifs	../tifs/Snap-92161-Image Export-10.tif	0	TRUE	663.154
N2	d8	rep3	tifs	../tifs/Snap-92161-Image Export-10.tif	2	TRUE	595.685
N2	d8	rep3	tifs	../tifs/Snap-92166-Image Export-15.tif	0	TRUE	628.236
N2	d8	rep3	tifs	../tifs/Snap-92166-Image Export-15.tif	1	TRUE	671.274
N2	d8	rep3	tifs	../tifs/Snap-92166-Image Export-15.tif	2	TRUE	712
N2	d8	rep3	tifs	../tifs/Snap-92166-Image Export-15.tif	4	TRUE	643.328
N2	d8	rep3	tifs	../tifs/Snap-92166-Image Export-15.tif	7	TRUE	612.071
N2	d8	rep3	tifs	../tifs/Snap-92163-Image Export-12.tif	3	TRUE	600.197
N2	d8	rep3	tifs	../tifs/Snap-92163-Image Export-12.tif	4	TRUE	731.956
N2	d8	rep3	tifs	../tifs/Snap-92163-Image Export-12.tif	5	TRUE	519.689
N2	d8	rep3	tifs	../tifs/Snap-92180-Image Export-29.tif	0	TRUE	622.299
N2	d8	rep3	tifs	../tifs/Snap-92168-Image Export-17.tif	0	TRUE	609.796
N2	d8	rep3	tifs	../tifs/Snap-92168-Image Export-17.tif	2	TRUE	638.685
N2	d8	rep3	tifs	../tifs/Snap-92168-Image Export-17.tif	3	TRUE	586.844
N2	d8	rep3	tifs	../tifs/Snap-92168-Image Export-17.tif	7	TRUE	593.318
N2	d8	rep3	tifs	../tifs/Snap-92159-Image Export-08.tif	1	TRUE	528.308
N2	d8	rep3	tifs	../tifs/Snap-92159-Image Export-08.tif	2	TRUE	638.777
MY2147	d8	rep3	tifs	../tifs/Snap-92199-Image Export-08.tif	1	TRUE	448.964
MY2147	d8	rep3	tifs	../tifs/Snap-92199-Image Export-08.tif	4	TRUE	468.384
MY2147	d8	rep3	tifs	../tifs/Snap-92200-Image Export-09.tif	0	TRUE	583.811
MY2147	d8	rep3	tifs	../tifs/Snap-92200-Image Export-09.tif	1	TRUE	561.395
MY2147	d8	rep3	tifs	../tifs/Snap-92200-Image Export-09.tif	3	TRUE	628.014
MY2147	d8	rep3	tifs	../tifs/Snap-92200-Image Export-09.tif	4	TRUE	461.375
MY2147	d8	rep3	tifs	../tifs/Snap-92200-Image Export-09.tif	5	TRUE	572.381
MY2147	d8	rep3	tifs	../tifs/Snap-92218-Image Export-27.tif	1	TRUE	606.893
MY2147	d8	rep3	tifs	../tifs/Snap-92212-Image Export-21.tif	1	TRUE	513.882
MY2147	d8	rep3	tifs	../tifs/Snap-92215-Image Export-24.tif	1	TRUE	508.351
MY2147	d8	rep3	tifs	../tifs/Snap-92213-Image Export-22.tif	0	TRUE	566.168
MY2147	d8	rep3	tifs	../tifs/Snap-92211-Image Export-20.tif	0	TRUE	531.878
MY2147	d8	rep3	tifs	../tifs/Snap-92216-Image Export-25.tif	0	TRUE	536.168
MY2147	d8	rep3	tifs	../tifs/Snap-92214-Image Export-23.tif	0	TRUE	377.833
MY2147	d8	rep3	tifs	../tifs/Snap-92209-Image Export-18.tif	0	TRUE	568.535
MY2147	d8	rep3	tifs	../tifs/Snap-92209-Image Export-18.tif	1	TRUE	561.081
MY2147	d8	rep3	tifs	../tifs/Snap-92220-Image Export-29.tif	0	TRUE	402.302
MY2147	d8	rep3	tifs	../tifs/Snap-92220-Image Export-29.tif	1	TRUE	466.868
MY2147	d8	rep3	tifs	../tifs/Snap-92192-Image Export-01.tif	0	TRUE	584.163
MY2147	d8	rep3	tifs	../tifs/Snap-92195-Image Export-04.tif	0	TRUE	537.018
MY2147	d8	rep3	tifs	../tifs/Snap-92208-Image Export-17.tif	0	TRUE	578.854
MY2147	d8	rep3	tifs	../tifs/Snap-92197-Image Export-06.tif	0	TRUE	532.192
MY2147	d8	rep3	tifs	../tifs/Snap-92197-Image Export-06.tif	1	TRUE	552.018
MY2147	d8	rep3	tifs	../tifs/Snap-92194-Image Export-03.tif	0	TRUE	604.84
MY2147	d8	rep3	tifs	../tifs/Snap-92194-Image Export-03.tif	1	TRUE	610.018
MY2147	d8	rep3	tifs	../tifs/Snap-92219-Image Export-28.tif	0	TRUE	477.761
MY2147	d8	rep3	tifs	../tifs/Snap-92219-Image Export-28.tif	1	TRUE	476.781
MY2147	d8	rep3	tifs	../tifs/Snap-92219-Image Export-28.tif	2	TRUE	532.414
MY2147	d8	rep3	tifs	../tifs/Snap-92204-Image Export-13.tif	1	TRUE	553.313
MY2147	d8	rep3	tifs	../tifs/Snap-92204-Image Export-13.tif	2	TRUE	487.544
MY2147	d8	rep3	tifs	../tifs/Snap-92204-Image Export-13.tif	3	TRUE	598.052
MY2147	d8	rep3	tifs	../tifs/Snap-92204-Image Export-13.tif	4	TRUE	584.791
MY2147	d8	rep3	tifs	../tifs/Snap-92207-Image Export-16.tif	0	TRUE	489.061
MY2147	d8	rep3	tifs	../tifs/Snap-92207-Image Export-16.tif	1	TRUE	546.747
MY2147	d8	rep3	tifs	../tifs/Snap-92207-Image Export-16.tif	2	TRUE	456.824
MY2147	d8	rep3	tifs	../tifs/Snap-92205-Image Export-14.tif	1	TRUE	597.516
MY2147	d8	rep3	tifs	../tifs/Snap-92205-Image Export-14.tif	3	TRUE	550.854
MY2147	d8	rep3	tifs	../tifs/Snap-92205-Image Export-14.tif	4	TRUE	572.825
MY2147	d8	rep3	tifs	../tifs/Snap-92205-Image Export-14.tif	6	TRUE	576.395
MY2147	d8	rep3	tifs	../tifs/Snap-92205-Image Export-14.tif	7	TRUE	593.188
MY2147	d8	rep3	tifs	../tifs/Snap-92202-Image Export-11.tif	0	TRUE	604.081
MY2147	d8	rep3	tifs	../tifs/Snap-92202-Image Export-11.tif	1	TRUE	565.187
MY2147	d8	rep3	tifs	../tifs/Snap-92202-Image Export-11.tif	2	TRUE	546.839
MY2147	d8	rep3	tifs	../tifs/Snap-92198-Image Export-07.tif	0	TRUE	599.753
MY2147	d8	rep3	tifs	../tifs/Snap-92198-Image Export-07.tif	1	TRUE	503.081
MY2147	d8	rep3	tifs	../tifs/Snap-92203-Image Export-12.tif	0	TRUE	554.071
MY2147	d8	rep3	tifs	../tifs/Snap-92203-Image Export-12.tif	2	TRUE	630.289
MY2147	d8	rep3	tifs	../tifs/Snap-92203-Image Export-12.tif	4	TRUE	439.587
MY2147	d8	rep3	tifs	../tifs/Snap-92203-Image Export-12.tif	5	TRUE	437.534
MY2147	d8	rep3	tifs	../tifs/Snap-92203-Image Export-12.tif	7	TRUE	533.264
MY2147	d8	rep3	tifs	../tifs/Snap-92206-Image Export-15.tif	0	TRUE	487.767
MY2147	d8	rep3	tifs	../tifs/Snap-92206-Image Export-15.tif	2	TRUE	450.925
MY2147	d8	rep3	tifs	../tifs/Snap-92201-Image Export-10.tif	1	TRUE	466.331
MY2147	d8	rep3	tifs	../tifs/Snap-92201-Image Export-10.tif	2	TRUE	592.115
MY2147	d8	rep3	tifs	../tifs/Snap-92201-Image Export-10.tif	3	TRUE	613.994
N2_irld52	d8	rep3	tifs	../tifs/Snap-92279-Image Export-05.tif	0	TRUE	719.546
N2_irld52	d8	rep3	tifs	../tifs/Snap-92278-Image Export-04.tif	0	TRUE	659.27
N2_irld52	d8	rep3	tifs	../tifs/Snap-92278-Image Export-04.tif	2	TRUE	636.632
N2_irld52	d8	rep3	tifs	../tifs/Snap-92278-Image Export-04.tif	3	TRUE	665.207
N2_irld52	d8	rep3	tifs	../tifs/Snap-92278-Image Export-04.tif	4	TRUE	631.362
N2_irld52	d8	rep3	tifs	../tifs/Snap-92289-Image Export-15.tif	0	TRUE	642.033
N2_irld52	d8	rep3	tifs	../tifs/Snap-92288-Image Export-14.tif	0	TRUE	640.738
N2_irld52	d8	rep3	tifs	../tifs/Snap-92288-Image Export-14.tif	1	TRUE	644.53
N2_irld52	d8	rep3	tifs	../tifs/Snap-92291-Image Export-17.tif	0	TRUE	637.835
N2_irld52	d8	rep3	tifs	../tifs/Snap-92291-Image Export-17.tif	1	TRUE	626.719
N2_irld52	d8	rep3	tifs	../tifs/Snap-92290-Image Export-16.tif	0	TRUE	438.293
N2_irld52	d8	rep3	tifs	../tifs/Snap-92290-Image Export-16.tif	1	TRUE	507.501
N2_irld52	d8	rep3	tifs	../tifs/Snap-92277-Image Export-03.tif	1	TRUE	600.733
N2_irld52	d8	rep3	tifs	../tifs/Snap-92303-Image Export-29.tif	0	TRUE	724.724
N2_irld52	d8	rep3	tifs	../tifs/Snap-92303-Image Export-29.tif	1	TRUE	682.98
N2_irld52	d8	rep3	tifs	../tifs/Snap-92276-Image Export-02.tif	0	TRUE	655.83
N2_irld52	d8	rep3	tifs	../tifs/Snap-92302-Image Export-28.tif	1	TRUE	630.695
N2_irld52	d8	rep3	tifs	../tifs/Snap-92302-Image Export-28.tif	2	TRUE	610.777
N2_irld52	d8	rep3	tifs	../tifs/Snap-92302-Image Export-28.tif	3	TRUE	625.516
N2_irld52	d8	rep3	tifs	../tifs/Snap-92280-Image Export-06.tif	0	TRUE	607.429
N2_irld52	d8	rep3	tifs	../tifs/Snap-92280-Image Export-06.tif	1	TRUE	636.41
N2_irld52	d8	rep3	tifs	../tifs/Snap-92285-Image Export-11.tif	0	TRUE	644.308
N2_irld52	d8	rep3	tifs	../tifs/Snap-92284-Image Export-10.tif	0	TRUE	598.68
N2_irld52	d8	rep3	tifs	../tifs/Snap-92287-Image Export-13.tif	0	TRUE	620.024
N2_irld52	d8	rep3	tifs	../tifs/Snap-92287-Image Export-13.tif	1	TRUE	657.661
N2_irld52	d8	rep3	tifs	../tifs/Snap-92287-Image Export-13.tif	2	TRUE	643.642
N2_irld52	d8	rep3	tifs	../tifs/Snap-92286-Image Export-12.tif	0	TRUE	572.159
N2_irld52	d8	rep3	tifs	../tifs/Snap-92286-Image Export-12.tif	1	TRUE	584.699
N2_irld52	d8	rep3	tifs	../tifs/Snap-92305-Image Export-31.tif	0	TRUE	575.1
N2_irld52	d8	rep3	tifs	../tifs/Snap-92305-Image Export-31.tif	1	TRUE	628.014
N2_irld52	d8	rep3	tifs	../tifs/Snap-92304-Image Export-30.tif	1	TRUE	634.487
N2_irld52	d8	rep3	tifs	../tifs/Snap-92304-Image Export-30.tif	2	TRUE	695.613
N2_irld52	d8	rep3	tifs	../tifs/Snap-92304-Image Export-30.tif	3	TRUE	541.347
N2_irld52	d8	rep3	tifs	../tifs/Snap-92304-Image Export-30.tif	4	TRUE	611.313
N2_irld52	d8	rep3	tifs	../tifs/Snap-92307-Image Export-33.tif	1	TRUE	605.598
N2_irld52	d8	rep3	tifs	../tifs/Snap-92298-Image Export-24.tif	0	TRUE	603.231
N2_irld52	d8	rep3	tifs	../tifs/Snap-92298-Image Export-24.tif	1	TRUE	438.071
N2_irld52	d8	rep3	tifs	../tifs/Snap-92298-Image Export-24.tif	2	TRUE	649.801
N2_irld52	d8	rep3	tifs	../tifs/Snap-92298-Image Export-24.tif	3	TRUE	626.941
N2_irld52	d8	rep3	tifs	../tifs/Snap-92306-Image Export-32.tif	0	TRUE	651.724
N2_irld52	d8	rep3	tifs	../tifs/Snap-92299-Image Export-25.tif	0	TRUE	664.763
N2_irld52	d8	rep3	tifs	../tifs/Snap-92283-Image Export-09.tif	0	TRUE	398.602
N2_irld52	d8	rep3	tifs	../tifs/Snap-92283-Image Export-09.tif	1	TRUE	636.762
N2_irld52	d8	rep3	tifs	../tifs/Snap-92301-Image Export-27.tif	0	TRUE	576.487
N2_irld52	d8	rep3	tifs	../tifs/Snap-92301-Image Export-27.tif	1	TRUE	552.24
N2_irld52	d8	rep3	tifs	../tifs/Snap-92301-Image Export-27.tif	2	TRUE	630.473
N2_irld52	d8	rep3	tifs	../tifs/Snap-92301-Image Export-27.tif	4	TRUE	542.419
N2_irld52	d8	rep3	tifs	../tifs/Snap-92300-Image Export-26.tif	2	TRUE	662.526
N2_irld52	d8	rep3	tifs	../tifs/Snap-92300-Image Export-26.tif	4	TRUE	653.241
N2_irld52	d8	rep3	tifs	../tifs/Snap-92294-Image Export-20.tif	0	TRUE	660.343
N2_irld52	d8	rep3	tifs	../tifs/Snap-92294-Image Export-20.tif	1	TRUE	556.975
N2_irld52	d8	rep3	tifs	../tifs/Snap-92292-Image Export-18.tif	0	TRUE	658.198
N2_irld52	d8	rep3	tifs	../tifs/Snap-92292-Image Export-18.tif	1	TRUE	604.395
N2_irld52	d8	rep3	tifs	../tifs/Snap-92308-Image Export-34.tif	0	TRUE	656.589
N2_irld52	d8	rep3	tifs	../tifs/Snap-92308-Image Export-34.tif	3	TRUE	593.946
N2_irld52	d8	rep3	tifs	../tifs/Snap-92308-Image Export-34.tif	4	TRUE	654.758
N2_irld52	d8	rep3	tifs	../tifs/Snap-92297-Image Export-23.tif	0	TRUE	665.317
N2_irld52	d8	rep3	tifs	../tifs/Snap-92297-Image Export-23.tif	2	TRUE	627.7
N2_irld52	d8	rep3	tifs	../tifs/Snap-92297-Image Export-23.tif	4	TRUE	627.477
N2_irld52	d8	rep3	tifs	../tifs/Snap-92297-Image Export-23.tif	5	TRUE	396.365
N2_irld52	d8	rep3	tifs	../tifs/Snap-92297-Image Export-23.tif	6	TRUE	567.738
MY_irld52	d8	rep3	tifs	../tifs/Snap-92313-Image Export-03.tif	0	TRUE	651.058
MY_irld52	d8	rep3	tifs	../tifs/Snap-92313-Image Export-03.tif	1	TRUE	620.598
MY_irld52	d8	rep3	tifs	../tifs/Snap-92313-Image Export-03.tif	2	TRUE	648.821
MY_irld52	d8	rep3	tifs	../tifs/Snap-92311-Image Export-01.tif	0	TRUE	622.299
MY_irld52	d8	rep3	tifs	../tifs/Snap-92311-Image Export-01.tif	1	TRUE	613.588
MY_irld52	d8	rep3	tifs	../tifs/Snap-92311-Image Export-01.tif	2	TRUE	618.545
MY_irld52	d8	rep3	tifs	../tifs/Snap-92317-Image Export-07.tif	0	TRUE	589.212
MY_irld52	d8	rep3	tifs	../tifs/Snap-92316-Image Export-06.tif	1	TRUE	564.298
MY_irld52	d8	rep3	tifs	../tifs/Snap-92316-Image Export-06.tif	2	TRUE	568.719
MY_irld52	d8	rep3	tifs	../tifs/Snap-92315-Image Export-05.tif	1	TRUE	551.038
MY_irld52	d8	rep3	tifs	../tifs/Snap-92315-Image Export-05.tif	2	TRUE	655.516
MY_irld52	d8	rep3	tifs	../tifs/Snap-92315-Image Export-05.tif	3	TRUE	609.352
MY_irld52	d8	rep3	tifs	../tifs/Snap-92315-Image Export-05.tif	4	TRUE	607.207
MY_irld52	d8	rep3	tifs	../tifs/Snap-92314-Image Export-04.tif	0	TRUE	642.163
MY_irld52	d8	rep3	tifs	../tifs/Snap-92329-Image Export-19.tif	1	TRUE	579.298
MY_irld52	d8	rep3	tifs	../tifs/Snap-92329-Image Export-19.tif	2	TRUE	599.791
MY_irld52	d8	rep3	tifs	../tifs/Snap-92329-Image Export-19.tif	3	TRUE	634.395
MY_irld52	d8	rep3	tifs	../tifs/Snap-92329-Image Export-19.tif	4	TRUE	632.434
MY_irld52	d8	rep3	tifs	../tifs/Snap-92328-Image Export-18.tif	1	TRUE	588.675
MY_irld52	d8	rep3	tifs	../tifs/Snap-92328-Image Export-18.tif	3	TRUE	616.362
MY_irld52	d8	rep3	tifs	../tifs/Snap-92328-Image Export-18.tif	4	TRUE	585.105
MY_irld52	d8	rep3	tifs	../tifs/Snap-92328-Image Export-18.tif	5	TRUE	533.578
MY_irld52	d8	rep3	tifs	../tifs/Snap-92328-Image Export-18.tif	6	TRUE	606.671
MY_irld52	d8	rep3	tifs	../tifs/Snap-92328-Image Export-18.tif	7	TRUE	606.042
MY_irld52	d8	rep3	tifs	../tifs/Snap-92328-Image Export-18.tif	8	TRUE	611.313
MY_irld52	d8	rep3	tifs	../tifs/Snap-92333-Image Export-23.tif	0	TRUE	602.787
MY_irld52	d8	rep3	tifs	../tifs/Snap-92332-Image Export-22.tif	1	TRUE	618.009
MY_irld52	d8	rep3	tifs	../tifs/Snap-92332-Image Export-22.tif	2	TRUE	712.406
MY_irld52	d8	rep3	tifs	../tifs/Snap-92331-Image Export-21.tif	0	TRUE	591.173
MY_irld52	d8	rep3	tifs	../tifs/Snap-92331-Image Export-21.tif	1	TRUE	576.265
MY_irld52	d8	rep3	tifs	../tifs/Snap-92330-Image Export-20.tif	2	TRUE	637.613
MY_irld52	d8	rep3	tifs	../tifs/Snap-92330-Image Export-20.tif	4	TRUE	590.69
MY_irld52	d8	rep3	tifs	../tifs/Snap-92318-Image Export-08.tif	0	TRUE	603.101
MY_irld52	d8	rep3	tifs	../tifs/Snap-92319-Image Export-09.tif	1	TRUE	573.047
MY_irld52	d8	rep3	tifs	../tifs/Snap-92322-Image Export-12.tif	0	TRUE	639.758
MY_irld52	d8	rep3	tifs	../tifs/Snap-92323-Image Export-13.tif	0	TRUE	592.559
MY_irld52	d8	rep3	tifs	../tifs/Snap-92323-Image Export-13.tif	1	TRUE	568.09
MY_irld52	d8	rep3	tifs	../tifs/Snap-92323-Image Export-13.tif	2	TRUE	528.4
MY_irld52	d8	rep3	tifs	../tifs/Snap-92323-Image Export-13.tif	3	TRUE	574.97
MY_irld52	d8	rep3	tifs	../tifs/Snap-92320-Image Export-10.tif	0	TRUE	602.25
MY_irld52	d8	rep3	tifs	../tifs/Snap-92320-Image Export-10.tif	1	TRUE	605.598
MY_irld52	d8	rep3	tifs	../tifs/Snap-92321-Image Export-11.tif	0	TRUE	604.84
MY_irld52	d8	rep3	tifs	../tifs/Snap-92321-Image Export-11.tif	2	TRUE	611.091
MY_irld52	d8	rep3	tifs	../tifs/Snap-92326-Image Export-16.tif	0	TRUE	506.965
MY_irld52	d8	rep3	tifs	../tifs/Snap-92326-Image Export-16.tif	1	TRUE	625.869
MY_irld52	d8	rep3	tifs	../tifs/Snap-92327-Image Export-17.tif	0	TRUE	616.27
MY_irld52	d8	rep3	tifs	../tifs/Snap-92327-Image Export-17.tif	1	TRUE	586.086
MY_irld52	d8	rep3	tifs	../tifs/Snap-92327-Image Export-17.tif	5	TRUE	629.086
MY_irld52	d8	rep3	tifs	../tifs/Snap-92327-Image Export-17.tif	8	TRUE	528.974
MY_irld52	d8	rep3	tifs	../tifs/Snap-92327-Image Export-17.tif	9	TRUE	589.526
MY_irld52	d8	rep3	tifs	../tifs/Snap-92324-Image Export-14.tif	1	TRUE	582.516
MY_irld52	d8	rep3	tifs	../tifs/Snap-92324-Image Export-14.tif	2	TRUE	630.733
MY_irld52	d8	rep3	tifs	../tifs/Snap-92324-Image Export-14.tif	3	TRUE	482.94
MY_irld52	d8	rep3	tifs	../tifs/Snap-92324-Image Export-14.tif	4	TRUE	553.313
MY_irld52	d8	rep3	tifs	../tifs/Snap-92325-Image Export-15.tif	1	TRUE	447.041
MY_irld52	d8	rep3	tifs	../tifs/Snap-92325-Image Export-15.tif	4	TRUE	579.927
N2_irld39	d8	rep3	tifs	../tifs/Snap-92236-Image Export-15.tif	1	TRUE	445.302
N2_irld39	d8	rep3	tifs	../tifs/Snap-92236-Image Export-15.tif	2	TRUE	648.154
N2_irld39	d8	rep3	tifs	../tifs/Snap-92236-Image Export-15.tif	3	TRUE	587.603
N2_irld39	d8	rep3	tifs	../tifs/Snap-92236-Image Export-15.tif	5	TRUE	580.907
N2_irld39	d8	rep3	tifs	../tifs/Snap-92236-Image Export-15.tif	6	TRUE	577.115
N2_irld39	d8	rep3	tifs	../tifs/Snap-92231-Image Export-10.tif	3	TRUE	636.318
N2_irld39	d8	rep3	tifs	../tifs/Snap-92231-Image Export-10.tif	5	TRUE	618.101
N2_irld39	d8	rep3	tifs	../tifs/Snap-92231-Image Export-10.tif	6	TRUE	660.787
N2_irld39	d8	rep3	tifs	../tifs/Snap-92231-Image Export-10.tif	7	TRUE	663.468
N2_irld39	d8	rep3	tifs	../tifs/Snap-92231-Image Export-10.tif	8	TRUE	650.337
N2_irld39	d8	rep3	tifs	../tifs/Snap-92233-Image Export-12.tif	0	TRUE	606.448
N2_irld39	d8	rep3	tifs	../tifs/Snap-92233-Image Export-12.tif	1	TRUE	613.144
N2_irld39	d8	rep3	tifs	../tifs/Snap-92233-Image Export-12.tif	2	TRUE	579.612
N2_irld39	d8	rep3	tifs	../tifs/Snap-92235-Image Export-14.tif	0	TRUE	499.641
N2_irld39	d8	rep3	tifs	../tifs/Snap-92235-Image Export-14.tif	1	TRUE	597.164
N2_irld39	d8	rep3	tifs	../tifs/Snap-92235-Image Export-14.tif	2	TRUE	607.207
N2_irld39	d8	rep3	tifs	../tifs/Snap-92235-Image Export-14.tif	3	TRUE	598.274
N2_irld39	d8	rep3	tifs	../tifs/Snap-92235-Image Export-14.tif	4	TRUE	534.873
N2_irld39	d8	rep3	tifs	../tifs/Snap-92232-Image Export-11.tif	0	TRUE	635.874
N2_irld39	d8	rep3	tifs	../tifs/Snap-92228-Image Export-07.tif	2	TRUE	358.099
N2_irld39	d8	rep3	tifs	../tifs/Snap-92228-Image Export-07.tif	3	TRUE	449.186
N2_irld39	d8	rep3	tifs	../tifs/Snap-92228-Image Export-07.tif	4	TRUE	566.26
N2_irld39	d8	rep3	tifs	../tifs/Snap-92228-Image Export-07.tif	5	TRUE	564.206
N2_irld39	d8	rep3	tifs	../tifs/Snap-92228-Image Export-07.tif	6	TRUE	667.26
N2_irld39	d8	rep3	tifs	../tifs/Snap-92237-Image Export-16.tif	1	TRUE	595.555
N2_irld39	d8	rep3	tifs	../tifs/Snap-92237-Image Export-16.tif	2	TRUE	550.501
N2_irld39	d8	rep3	tifs	../tifs/Snap-92237-Image Export-16.tif	3	TRUE	563.134
N2_irld39	d8	rep3	tifs	../tifs/Snap-92237-Image Export-16.tif	4	TRUE	545.859
N2_irld39	d8	rep3	tifs	../tifs/Snap-92237-Image Export-16.tif	7	TRUE	581.221
N2_irld39	d8	rep3	tifs	../tifs/Snap-92234-Image Export-13.tif	0	TRUE	627.033
N2_irld39	d8	rep3	tifs	../tifs/Snap-92234-Image Export-13.tif	1	TRUE	568.183
N2_irld39	d8	rep3	tifs	../tifs/Snap-92234-Image Export-13.tif	3	TRUE	608.41
N2_irld39	d8	rep3	tifs	../tifs/Snap-92234-Image Export-13.tif	4	TRUE	585.772
N2_irld39	d8	rep3	tifs	../tifs/Snap-92234-Image Export-13.tif	5	TRUE	440.124
N2_irld39	d8	rep3	tifs	../tifs/Snap-92234-Image Export-13.tif	6	TRUE	592.023
N2_irld39	d8	rep3	tifs	../tifs/Snap-92234-Image Export-13.tif	7	TRUE	573.361
N2_irld39	d8	rep3	tifs	../tifs/Snap-92234-Image Export-13.tif	9	TRUE	566.129
N2_irld39	d8	rep3	tifs	../tifs/Snap-92234-Image Export-13.tif	10	TRUE	597.516
N2_irld39	d8	rep3	tifs	../tifs/Snap-92234-Image Export-13.tif	11	TRUE	578.632
N2_irld39	d8	rep3	tifs	../tifs/Snap-92234-Image Export-13.tif	12	TRUE	644.086
N2_irld39	d8	rep3	tifs	../tifs/Snap-92234-Image Export-13.tif	13	TRUE	487.989
N2_irld39	d8	rep3	tifs	../tifs/Snap-92234-Image Export-13.tif	15	TRUE	581.443
N2_irld39	d8	rep3	tifs	../tifs/Snap-92234-Image Export-13.tif	16	TRUE	584.033
N2_irld39	d8	rep3	tifs	../tifs/Snap-92234-Image Export-13.tif	17	TRUE	601.178
N2_irld39	d8	rep3	tifs	../tifs/Snap-92234-Image Export-13.tif	18	TRUE	459.192
N2_irld39	d8	rep3	tifs	../tifs/Snap-92234-Image Export-13.tif	20	TRUE	546.303
N2_irld39	d8	rep3	tifs	../tifs/Snap-92234-Image Export-13.tif	22	TRUE	525.81
N2_irld39	d8	rep3	tifs	../tifs/Snap-92242-Image Export-21.tif	0	TRUE	596.443
N2_irld39	d8	rep3	tifs	../tifs/Snap-92243-Image Export-22.tif	0	TRUE	564.743
N2_irld39	d8	rep3	tifs	../tifs/Snap-92224-Image Export-03.tif	0	TRUE	604.173
N2_irld39	d8	rep3	tifs	../tifs/Snap-92224-Image Export-03.tif	1	TRUE	644.086
N2_irld39	d8	rep3	tifs	../tifs/Snap-92223-Image Export-02.tif	0	TRUE	625.018
N2_irld39	d8	rep3	tifs	../tifs/Snap-92223-Image Export-02.tif	1	TRUE	546.617
N2_irld39	d8	rep3	tifs	../tifs/Snap-92223-Image Export-02.tif	2	TRUE	558.269
N2_irld39	d8	rep3	tifs	../tifs/Snap-92223-Image Export-02.tif	3	TRUE	572.159
N2_irld39	d8	rep3	tifs	../tifs/Snap-92223-Image Export-02.tif	4	TRUE	672.217
N2_irld39	d8	rep3	tifs	../tifs/Snap-92223-Image Export-02.tif	6	TRUE	537.685
N2_irld39	d8	rep3	tifs	../tifs/Snap-92223-Image Export-02.tif	8	TRUE	440.66
N2_irld39	d8	rep3	tifs	../tifs/Snap-92226-Image Export-05.tif	3	TRUE	631.454
N2_irld39	d8	rep3	tifs	../tifs/Snap-92226-Image Export-05.tif	4	TRUE	667.666
N2_irld39	d8	rep3	tifs	../tifs/Snap-92226-Image Export-05.tif	5	TRUE	606.134
N2_irld39	d8	rep3	tifs	../tifs/Snap-92240-Image Export-19.tif	1	TRUE	471.602
N2_irld39	d8	rep3	tifs	../tifs/Snap-92240-Image Export-19.tif	2	TRUE	618.101
N2_irld39	d8	rep3	tifs	../tifs/Snap-92240-Image Export-19.tif	3	TRUE	591.579
N2_irld39	d8	rep3	tifs	../tifs/Snap-92227-Image Export-06.tif	0	TRUE	591.357
N2_irld39	d8	rep3	tifs	../tifs/Snap-92227-Image Export-06.tif	1	TRUE	601.806
N2_irld39	d8	rep3	tifs	../tifs/Snap-92227-Image Export-06.tif	2	TRUE	608.594
N2_irld39	d8	rep3	tifs	../tifs/Snap-92227-Image Export-06.tif	3	TRUE	466.201
N2_irld39	d8	rep3	tifs	../tifs/Snap-92227-Image Export-06.tif	4	TRUE	571.4
N2_irld39	d8	rep3	tifs	../tifs/Snap-92227-Image Export-06.tif	5	TRUE	544.564
N2_irld39	d8	rep3	tifs	../tifs/Snap-92227-Image Export-06.tif	6	TRUE	636.946
N2_irld39	d8	rep3	tifs	../tifs/Snap-92227-Image Export-06.tif	9	TRUE	570.328
N2_irld39	d8	rep3	tifs	../tifs/Snap-92227-Image Export-06.tif	10	TRUE	645.381
N2_irld39	d8	rep3	tifs	../tifs/Snap-92227-Image Export-06.tif	11	TRUE	520.003
N2_irld39	d8	rep3	tifs	../tifs/Snap-92227-Image Export-06.tif	15	TRUE	493.037
N2_irld39	d8	rep3	tifs	../tifs/Snap-92225-Image Export-04.tif	0	TRUE	594.482
[truncated: 744 more rows]

## Sheet: Fig_3L
strain	strain2	day	replicate	imageFile	id	pass	length
LRB420	irld-11 in MY	d1	r1	../d1_r1_irlds/LRB420_d1_r1/Snap-104188-Image Export-06.tif	0	TRUE	771.609
LRB420	irld-11 in MY	d1	r1	../d1_r1_irlds/LRB420_d1_r1/Snap-104188-Image Export-06.tif	1	TRUE	753.169
LRB420	irld-11 in MY	d1	r1	../d1_r1_irlds/LRB420_d1_r1/Snap-104188-Image Export-06.tif	2	TRUE	730.753
LRB420	irld-11 in MY	d1	r1	../d1_r1_irlds/LRB420_d1_r1/Snap-104188-Image Export-06.tif	3	TRUE	747.898
LRB420	irld-11 in MY	d1	r1	../d1_r1_irlds/LRB420_d1_r1/Snap-104189-Image Export-07.tif	0	TRUE	707.265
LRB420	irld-11 in MY	d1	r1	../d1_r1_irlds/LRB420_d1_r1/Snap-104189-Image Export-07.tif	1	TRUE	747.048
LRB420	irld-11 in MY	d1	r1	../d1_r1_irlds/LRB420_d1_r1/Snap-104192-Image Export-10.tif	0	TRUE	661.637
LRB420	irld-11 in MY	d1	r1	../d1_r1_irlds/LRB420_d1_r1/Snap-104192-Image Export-10.tif	1	TRUE	689.99
LRB420	irld-11 in MY	d1	r1	../d1_r1_irlds/LRB420_d1_r1/Snap-104192-Image Export-10.tif	2	TRUE	738.299
LRB420	irld-11 in MY	d1	r1	../d1_r1_irlds/LRB420_d1_r1/Snap-104192-Image Export-10.tif	3	TRUE	751.56
LRB420	irld-11 in MY	d1	r1	../d1_r1_irlds/LRB420_d1_r1/Snap-104253-Image Export-71.tif	0	TRUE	709.724
LRB420	irld-11 in MY	d1	r1	../d1_r1_irlds/LRB420_d1_r1/Snap-104253-Image Export-71.tif	1	TRUE	734.637
LRB420	irld-11 in MY	d1	r1	../d1_r1_irlds/LRB420_d1_r1/Snap-104253-Image Export-71.tif	2	TRUE	676.951
LRB420	irld-11 in MY	d1	r1	../d1_r1_irlds/LRB420_d1_r1/Snap-104249-Image Export-67.tif	0	TRUE	695.613
LRB420	irld-11 in MY	d1	r1	../d1_r1_irlds/LRB420_d1_r1/Snap-104249-Image Export-67.tif	1	TRUE	665.651
LRB420	irld-11 in MY	d1	r1	../d1_r1_irlds/LRB420_d1_r1/Snap-104252-Image Export-70.tif	1	TRUE	690.082
LRB420	irld-11 in MY	d1	r1	../d1_r1_irlds/LRB420_d1_r1/Snap-104252-Image Export-70.tif	2	TRUE	705.396
LRB420	irld-11 in MY	d1	r1	../d1_r1_irlds/LRB420_d1_r1/Snap-104197-Image Export-15.tif	2	TRUE	748.879
LRB420	irld-11 in MY	d1	r1	../d1_r1_irlds/LRB420_d1_r1/Snap-104235-Image Export-53.tif	0	TRUE	469.771
LRB420	irld-11 in MY	d1	r1	../d1_r1_irlds/LRB420_d1_r1/Snap-104235-Image Export-53.tif	1	TRUE	656.144
LRB420	irld-11 in MY	d1	r1	../d1_r1_irlds/LRB420_d1_r1/Snap-104235-Image Export-53.tif	2	TRUE	733.305
LRB420	irld-11 in MY	d1	r1	../d1_r1_irlds/LRB420_d1_r1/Snap-104235-Image Export-53.tif	3	TRUE	753.391
LRB420	irld-11 in MY	d1	r1	../d1_r1_irlds/LRB420_d1_r1/Snap-104235-Image Export-53.tif	4	TRUE	721.783
LRB420	irld-11 in MY	d1	r1	../d1_r1_irlds/LRB420_d1_r1/Snap-104196-Image Export-14.tif	1	TRUE	756.295
LRB420	irld-11 in MY	d1	r1	../d1_r1_irlds/LRB420_d1_r1/Snap-104196-Image Export-14.tif	2	TRUE	690.84
LRB420	irld-11 in MY	d1	r1	../d1_r1_irlds/LRB420_d1_r1/Snap-104196-Image Export-14.tif	5	TRUE	712.628
LRB420	irld-11 in MY	d1	r1	../d1_r1_irlds/LRB420_d1_r1/Snap-104234-Image Export-52.tif	0	TRUE	729.643
LRB420	irld-11 in MY	d1	r1	../d1_r1_irlds/LRB420_d1_r1/Snap-104234-Image Export-52.tif	1	TRUE	636.854
LRB420	irld-11 in MY	d1	r1	../d1_r1_irlds/LRB420_d1_r1/Snap-104257-Image Export-75.tif	0	TRUE	645.381
LRB420	irld-11 in MY	d1	r1	../d1_r1_irlds/LRB420_d1_r1/Snap-104257-Image Export-75.tif	1	TRUE	659.676
LRB420	irld-11 in MY	d1	r1	../d1_r1_irlds/LRB420_d1_r1/Snap-104257-Image Export-75.tif	2	TRUE	671.144
LRB420	irld-11 in MY	d1	r1	../d1_r1_irlds/LRB420_d1_r1/Snap-104257-Image Export-75.tif	3	TRUE	674.584
LRB420	irld-11 in MY	d1	r1	../d1_r1_irlds/LRB420_d1_r1/Snap-104257-Image Export-75.tif	4	TRUE	686.328
LRB420	irld-11 in MY	d1	r1	../d1_r1_irlds/LRB420_d1_r1/Snap-104256-Image Export-74.tif	0	TRUE	689.99
LRB420	irld-11 in MY	d1	r1	../d1_r1_irlds/LRB420_d1_r1/Snap-104256-Image Export-74.tif	1	TRUE	671.773
LRB420	irld-11 in MY	d1	r1	../d1_r1_irlds/LRB420_d1_r1/Snap-104256-Image Export-74.tif	2	TRUE	730.531
LRB420	irld-11 in MY	d1	r1	../d1_r1_irlds/LRB420_d1_r1/Snap-104237-Image Export-55.tif	0	TRUE	753.705
LRB420	irld-11 in MY	d1	r1	../d1_r1_irlds/LRB420_d1_r1/Snap-104237-Image Export-55.tif	1	TRUE	685.57
LRB420	irld-11 in MY	d1	r1	../d1_r1_irlds/LRB420_d1_r1/Snap-104237-Image Export-55.tif	2	TRUE	672.975
LRB420	irld-11 in MY	d1	r1	../d1_r1_irlds/LRB420_d1_r1/Snap-104195-Image Export-13.tif	0	TRUE	691.377
LRB420	irld-11 in MY	d1	r1	../d1_r1_irlds/LRB420_d1_r1/Snap-104195-Image Export-13.tif	1	TRUE	723.207
LRB420	irld-11 in MY	d1	r1	../d1_r1_irlds/LRB420_d1_r1/Snap-104195-Image Export-13.tif	2	TRUE	686.995
LRB420	irld-11 in MY	d1	r1	../d1_r1_irlds/LRB420_d1_r1/Snap-104195-Image Export-13.tif	3	TRUE	692.487
LRB420	irld-11 in MY	d1	r1	../d1_r1_irlds/LRB420_d1_r1/Snap-104195-Image Export-13.tif	4	TRUE	762.99
LRB420	irld-11 in MY	d1	r1	../d1_r1_irlds/LRB420_d1_r1/Snap-104195-Image Export-13.tif	5	TRUE	705.082
LRB420	irld-11 in MY	d1	r1	../d1_r1_irlds/LRB420_d1_r1/Snap-104195-Image Export-13.tif	7	TRUE	750.488
LRB420	irld-11 in MY	d1	r1	../d1_r1_irlds/LRB420_d1_r1/Snap-104210-Image Export-28.tif	0	TRUE	722.671
LRB420	irld-11 in MY	d1	r1	../d1_r1_irlds/LRB420_d1_r1/Snap-104210-Image Export-28.tif	2	TRUE	681.28
LRB420	irld-11 in MY	d1	r1	../d1_r1_irlds/LRB420_d1_r1/Snap-104210-Image Export-28.tif	3	TRUE	734.86
LRB420	irld-11 in MY	d1	r1	../d1_r1_irlds/LRB420_d1_r1/Snap-104210-Image Export-28.tif	4	TRUE	777.952
LRB420	irld-11 in MY	d1	r1	../d1_r1_irlds/LRB420_d1_r1/Snap-104254-Image Export-72.tif	0	TRUE	697.13
LRB420	irld-11 in MY	d1	r1	../d1_r1_irlds/LRB420_d1_r1/Snap-104254-Image Export-72.tif	1	TRUE	728.478
LRB420	irld-11 in MY	d1	r1	../d1_r1_irlds/LRB420_d1_r1/Snap-104254-Image Export-72.tif	2	TRUE	629.086
LRB420	irld-11 in MY	d1	r1	../d1_r1_irlds/LRB420_d1_r1/Snap-104211-Image Export-29.tif	0	TRUE	729.237
LRB420	irld-11 in MY	d1	r1	../d1_r1_irlds/LRB420_d1_r1/Snap-104211-Image Export-29.tif	2	TRUE	798.261
LRB420	irld-11 in MY	d1	r1	../d1_r1_irlds/LRB420_d1_r1/Snap-104211-Image Export-29.tif	3	TRUE	671.55
LRB420	irld-11 in MY	d1	r1	../d1_r1_irlds/LRB420_d1_r1/Snap-104211-Image Export-29.tif	4	TRUE	728.792
LRB420	irld-11 in MY	d1	r1	../d1_r1_irlds/LRB420_d1_r1/Snap-104211-Image Export-29.tif	5	TRUE	737.541
LRB420	irld-11 in MY	d1	r1	../d1_r1_irlds/LRB420_d1_r1/Snap-104211-Image Export-29.tif	6	TRUE	729.014
LRB420	irld-11 in MY	d1	r1	../d1_r1_irlds/LRB420_d1_r1/Snap-104255-Image Export-73.tif	0	TRUE	694.855
LRB420	irld-11 in MY	d1	r1	../d1_r1_irlds/LRB420_d1_r1/Snap-104255-Image Export-73.tif	1	TRUE	694.947
LRB420	irld-11 in MY	d1	r1	../d1_r1_irlds/LRB420_d1_r1/Snap-104255-Image Export-73.tif	2	TRUE	643.198
LRB420	irld-11 in MY	d1	r1	../d1_r1_irlds/LRB420_d1_r1/Snap-104255-Image Export-73.tif	3	TRUE	717.048
LRB420	irld-11 in MY	d1	r1	../d1_r1_irlds/LRB420_d1_r1/Snap-104232-Image Export-50.tif	0	TRUE	730.976
LRB420	irld-11 in MY	d1	r1	../d1_r1_irlds/LRB420_d1_r1/Snap-104232-Image Export-50.tif	1	TRUE	772.681
LRB420	irld-11 in MY	d1	r1	../d1_r1_irlds/LRB420_d1_r1/Snap-104229-Image Export-47.tif	0	TRUE	741.111
LRB420	irld-11 in MY	d1	r1	../d1_r1_irlds/LRB420_d1_r1/Snap-104229-Image Export-47.tif	1	TRUE	680.743
LRB420	irld-11 in MY	d1	r1	../d1_r1_irlds/LRB420_d1_r1/Snap-104233-Image Export-51.tif	0	TRUE	774.29
LRB420	irld-11 in MY	d1	r1	../d1_r1_irlds/LRB420_d1_r1/Snap-104233-Image Export-51.tif	1	TRUE	674.048
LRB420	irld-11 in MY	d1	r1	../d1_r1_irlds/LRB420_d1_r1/Snap-104228-Image Export-46.tif	0	TRUE	739.242
LRB420	irld-11 in MY	d1	r1	../d1_r1_irlds/LRB420_d1_r1/Snap-104228-Image Export-46.tif	1	TRUE	745.753
LRB420	irld-11 in MY	d1	r1	../d1_r1_irlds/LRB420_d1_r1/Snap-104244-Image Export-62.tif	0	TRUE	728.034
LRB420	irld-11 in MY	d1	r1	../d1_r1_irlds/LRB420_d1_r1/Snap-104244-Image Export-62.tif	1	TRUE	686.014
LRB420	irld-11 in MY	d1	r1	../d1_r1_irlds/LRB420_d1_r1/Snap-104244-Image Export-62.tif	2	TRUE	686.772
LRB420	irld-11 in MY	d1	r1	../d1_r1_irlds/LRB420_d1_r1/Snap-104245-Image Export-63.tif	0	TRUE	746.343
LRB420	irld-11 in MY	d1	r1	../d1_r1_irlds/LRB420_d1_r1/Snap-104245-Image Export-63.tif	1	TRUE	688.473
LRB420	irld-11 in MY	d1	r1	../d1_r1_irlds/LRB420_d1_r1/Snap-104226-Image Export-44.tif	0	TRUE	712.942
LRB420	irld-11 in MY	d1	r1	../d1_r1_irlds/LRB420_d1_r1/Snap-104226-Image Export-44.tif	1	TRUE	762.324
LRB420	irld-11 in MY	d1	r1	../d1_r1_irlds/LRB420_d1_r1/Snap-104241-Image Export-59.tif	1	TRUE	714.459
LRB420	irld-11 in MY	d1	r1	../d1_r1_irlds/LRB420_d1_r1/Snap-104241-Image Export-59.tif	2	TRUE	754.242
LRB420	irld-11 in MY	d1	r1	../d1_r1_irlds/LRB420_d1_r1/Snap-104241-Image Export-59.tif	3	TRUE	720.082
LRB420	irld-11 in MY	d1	r1	../d1_r1_irlds/LRB420_d1_r1/Snap-104241-Image Export-59.tif	4	TRUE	726.019
LRB420	irld-11 in MY	d1	r1	../d1_r1_irlds/LRB420_d1_r1/Snap-104184-Image Export-02.tif	0	TRUE	669.85
LRB420	irld-11 in MY	d1	r1	../d1_r1_irlds/LRB420_d1_r1/Snap-104184-Image Export-02.tif	1	TRUE	759.328
LRB420	irld-11 in MY	d1	r1	../d1_r1_irlds/LRB420_d1_r1/Snap-104227-Image Export-45.tif	0	TRUE	731.512
LRB420	irld-11 in MY	d1	r1	../d1_r1_irlds/LRB420_d1_r1/Snap-104227-Image Export-45.tif	1	TRUE	672.066
LRB420	irld-11 in MY	d1	r1	../d1_r1_irlds/LRB420_d1_r1/Snap-104227-Image Export-45.tif	2	TRUE	713.072
LRB420	irld-11 in MY	d1	r1	../d1_r1_irlds/LRB420_d1_r1/Snap-104240-Image Export-58.tif	0	TRUE	762.102
LRB420	irld-11 in MY	d1	r1	../d1_r1_irlds/LRB420_d1_r1/Snap-104240-Image Export-58.tif	1	TRUE	496.607
LRB420	irld-11 in MY	d1	r1	../d1_r1_irlds/LRB420_d1_r1/Snap-104240-Image Export-58.tif	2	TRUE	725.038
LRB420	irld-11 in MY	d1	r1	../d1_r1_irlds/LRB420_d1_r1/Snap-104240-Image Export-58.tif	3	TRUE	731.198
LRB420	irld-11 in MY	d1	r1	../d1_r1_irlds/LRB420_d1_r1/Snap-104239-Image Export-57.tif	0	TRUE	681.778
LRB420	irld-11 in MY	d1	r1	../d1_r1_irlds/LRB420_d1_r1/Snap-104239-Image Export-57.tif	1	TRUE	745.807
LRB420	irld-11 in MY	d1	r1	../d1_r1_irlds/LRB420_d1_r1/Snap-104239-Image Export-57.tif	2	TRUE	651.946
LRB420	irld-11 in MY	d1	r1	../d1_r1_irlds/LRB420_d1_r1/Snap-104223-Image Export-41.tif	0	TRUE	757.367
LRB420	irld-11 in MY	d1	r1	../d1_r1_irlds/LRB420_d1_r1/Snap-104223-Image Export-41.tif	1	TRUE	688.289
LRB420	irld-11 in MY	d1	r1	../d1_r1_irlds/LRB420_d1_r1/Snap-104242-Image Export-60.tif	0	TRUE	712.13
LRB420	irld-11 in MY	d1	r1	../d1_r1_irlds/LRB420_d1_r1/Snap-104242-Image Export-60.tif	2	TRUE	679.855
LRB420	irld-11 in MY	d1	r1	../d1_r1_irlds/LRB420_d1_r1/Snap-104198-Image Export-16.tif	1	TRUE	738.391
LRB420	irld-11 in MY	d1	r1	../d1_r1_irlds/LRB420_d1_r1/Snap-104198-Image Export-16.tif	2	TRUE	691.415
LRB420	irld-11 in MY	d1	r1	../d1_r1_irlds/LRB420_d1_r1/Snap-104198-Image Export-16.tif	3	TRUE	687.401
LRB420	irld-11 in MY	d1	r1	../d1_r1_irlds/LRB420_d1_r1/Snap-104183-Image Export-01.tif	0	TRUE	643.826
LRB420	irld-11 in MY	d1	r1	../d1_r1_irlds/LRB420_d1_r1/Snap-104183-Image Export-01.tif	1	TRUE	721.691
LRB420	irld-11 in MY	d1	r1	../d1_r1_irlds/LRB420_d1_r1/Snap-104199-Image Export-17.tif	0	TRUE	657.033
LRB420	irld-11 in MY	d1	r1	../d1_r1_irlds/LRB420_d1_r1/Snap-104199-Image Export-17.tif	1	TRUE	675.342
LRB420	irld-11 in MY	d1	r1	../d1_r1_irlds/LRB420_d1_r1/Snap-104199-Image Export-17.tif	2	TRUE	779.469
LRB420	irld-11 in MY	d1	r1	../d1_r1_irlds/LRB420_d1_r1/Snap-104199-Image Export-17.tif	3	TRUE	708.43
LRB420	irld-11 in MY	d1	r1	../d1_r1_irlds/LRB420_d1_r1/Snap-104247-Image Export-65.tif	0	TRUE	718.343
LRB420	irld-11 in MY	d1	r1	../d1_r1_irlds/LRB420_d1_r1/Snap-104247-Image Export-65.tif	1	TRUE	652.797
LRB420	irld-11 in MY	d1	r1	../d1_r1_irlds/LRB420_d1_r1/Snap-104247-Image Export-65.tif	2	TRUE	676.101
LRB420	irld-11 in MY	d1	r1	../d1_r1_irlds/LRB420_d1_r1/Snap-104247-Image Export-65.tif	3	TRUE	665.874
LRB420	irld-11 in MY	d1	r1	../d1_r1_irlds/LRB420_d1_r1/Snap-104246-Image Export-64.tif	0	TRUE	683.425
LRB420	irld-11 in MY	d1	r1	../d1_r1_irlds/LRB420_d1_r1/Snap-104246-Image Export-64.tif	1	TRUE	750.043
LRB420	irld-11 in MY	d1	r1	../d1_r1_irlds/LRB420_d1_r1/Snap-104246-Image Export-64.tif	2	TRUE	658.198
LRB420	irld-11 in MY	d1	r1	../d1_r1_irlds/LRB420_d1_r1/Snap-104246-Image Export-64.tif	3	TRUE	682.98
LRB420	irld-11 in MY	d1	r1	../d1_r1_irlds/LRB420_d1_r1/Snap-104187-Image Export-05.tif	0	TRUE	745.401
LRB420	irld-11 in MY	d1	r1	../d1_r1_irlds/LRB420_d1_r1/Snap-104187-Image Export-05.tif	2	TRUE	743.034
LRB420	irld-11 in MY	d1	r1	../d1_r1_irlds/LRB420_d1_r1/Snap-104187-Image Export-05.tif	3	TRUE	686.772
LRB420	irld-11 in MY	d1	r1	../d1_r1_irlds/LRB420_d1_r1/Snap-104225-Image Export-43.tif	0	TRUE	708.652
LRB420	irld-11 in MY	d1	r1	../d1_r1_irlds/LRB420_d1_r1/Snap-104225-Image Export-43.tif	1	TRUE	734.952
LRB420	irld-11 in MY	d1	r1	../d1_r1_irlds/LRB420_d1_r1/Snap-104186-Image Export-04.tif	2	TRUE	756.739
LRB420	irld-11 in MY	d1	r1	../d1_r1_irlds/LRB420_d1_r1/Snap-104186-Image Export-04.tif	6	TRUE	715.884
LRB420	irld-11 in MY	d1	r1	../d1_r1_irlds/LRB420_d1_r1/Snap-104186-Image Export-04.tif	7	TRUE	671.995
LRB420	irld-11 in MY	d1	r1	../d1_r1_irlds/LRB420_d1_r1/Snap-104224-Image Export-42.tif	0	TRUE	737.189
LRB420	irld-11 in MY	d1	r1	../d1_r1_irlds/LRB420_d1_r1/Snap-104205-Image Export-23.tif	0	TRUE	765.894
LRB420	irld-11 in MY	d1	r1	../d1_r1_irlds/LRB420_d1_r1/Snap-104205-Image Export-23.tif	1	TRUE	773.034
LRB420	irld-11 in MY	d1	r1	../d1_r1_irlds/LRB420_d1_r1/Snap-104205-Image Export-23.tif	2	TRUE	698.386
LRB420	irld-11 in MY	d1	r1	../d1_r1_irlds/LRB420_d1_r1/Snap-104201-Image Export-19.tif	0	TRUE	735.932
LRB420	irld-11 in MY	d1	r1	../d1_r1_irlds/LRB420_d1_r1/Snap-104200-Image Export-18.tif	1	TRUE	726.647
LRB420	irld-11 in MY	d1	r1	../d1_r1_irlds/LRB420_d1_r1/Snap-104200-Image Export-18.tif	2	TRUE	715.217
LRB420	irld-11 in MY	d1	r1	../d1_r1_irlds/LRB420_d1_r1/Snap-104218-Image Export-36.tif	0	TRUE	787.199
LRB420	irld-11 in MY	d1	r1	../d1_r1_irlds/LRB420_d1_r1/Snap-104219-Image Export-37.tif	0	TRUE	702.623
LRB420	irld-11 in MY	d1	r1	../d1_r1_irlds/LRB420_d1_r1/Snap-104219-Image Export-37.tif	1	TRUE	698.517
LRB420	irld-11 in MY	d1	r1	../d1_r1_irlds/LRB420_d1_r1/Snap-104219-Image Export-37.tif	2	TRUE	742.183
LRB420	irld-11 in MY	d1	r1	../d1_r1_irlds/LRB420_d1_r1/Snap-104219-Image Export-37.tif	3	TRUE	688.067
LRB420	irld-11 in MY	d1	r1	../d1_r1_irlds/LRB420_d1_r1/Snap-104207-Image Export-25.tif	0	TRUE	753.169
LRB420	irld-11 in MY	d1	r1	../d1_r1_irlds/LRB420_d1_r1/Snap-104207-Image Export-25.tif	1	TRUE	561.081
LRB420	irld-11 in MY	d1	r1	../d1_r1_irlds/LRB420_d1_r1/Snap-104206-Image Export-24.tif	1	TRUE	686.328
LRB420	irld-11 in MY	d1	r1	../d1_r1_irlds/LRB420_d1_r1/Snap-104208-Image Export-26.tif	0	TRUE	791.343
LRB420	irld-11 in MY	d1	r1	../d1_r1_irlds/LRB420_d1_r1/Snap-104212-Image Export-30.tif	0	TRUE	751.966
LRB420	irld-11 in MY	d1	r1	../d1_r1_irlds/LRB420_d1_r1/Snap-104212-Image Export-30.tif	1	TRUE	695.613
LRB420	irld-11 in MY	d1	r1	../d1_r1_irlds/LRB420_d1_r1/Snap-104209-Image Export-27.tif	0	TRUE	699.497
LRB420	irld-11 in MY	d1	r1	../d1_r1_irlds/LRB420_d1_r1/Snap-104231-Image Export-49.tif	0	TRUE	751.338
LRB420	irld-11 in MY	d1	r1	../d1_r1_irlds/LRB420_d1_r1/Snap-104231-Image Export-49.tif	1	TRUE	622.521
LRB420	irld-11 in MY	d1	r1	../d1_r1_irlds/LRB420_d1_r1/Snap-104231-Image Export-49.tif	2	TRUE	708.744
LRB420	irld-11 in MY	d1	r1	../d1_r1_irlds/LRB420_d1_r1/Snap-104230-Image Export-48.tif	0	TRUE	683.961
LRB420	irld-11 in MY	d1	r1	../d1_r1_irlds/LRB420_d1_r1/Snap-104217-Image Export-35.tif	0	TRUE	714.589
LRB420	irld-11 in MY	d1	r1	../d1_r1_irlds/LRB420_d1_r1/Snap-104216-Image Export-34.tif	0	TRUE	677.618
LRB420	irld-11 in MY	d1	r1	../d1_r1_irlds/LRB420_d1_r1/Snap-104216-Image Export-34.tif	1	TRUE	730.087
LRB420	irld-11 in MY	d1	r1	../d1_r1_irlds/LRB420_d1_r1/Snap-104190-Image Export-08.tif	0	TRUE	762.01
LRB420	irld-11 in MY	d1	r1	../d1_r1_irlds/LRB420_d1_r1/Snap-104190-Image Export-08.tif	1	TRUE	711.019
LRB420	irld-11 in MY	d1	r1	../d1_r1_irlds/LRB420_d1_r1/Snap-104190-Image Export-08.tif	2	TRUE	790.362
LRB420	irld-11 in MY	d1	r1	../d1_r1_irlds/LRB420_d1_r1/Snap-104191-Image Export-09.tif	1	TRUE	639.444
LRB420	irld-11 in MY	d1	r1	../d1_r1_irlds/LRB420_d1_r1/Snap-104191-Image Export-09.tif	2	TRUE	760.179
LRB420	irld-11 in MY	d1	r1	../d1_r1_irlds/LRB420_d1_r1/Snap-104214-Image Export-32.tif	0	TRUE	653.019
LRB420	irld-11 in MY	d1	r1	../d1_r1_irlds/LRB420_d1_r1/Snap-104214-Image Export-32.tif	1	TRUE	666.502
LRB420	irld-11 in MY	d1	r1	../d1_r1_irlds/LRB420_d1_r1/Snap-104214-Image Export-32.tif	2	TRUE	756.165
LRB420	irld-11 in MY	d1	r1	../d1_r1_irlds/LRB420_d1_r1/Snap-104221-Image Export-39.tif	0	TRUE	671.458
LRB420	irld-11 in MY	d1	r1	../d1_r1_irlds/LRB420_d1_r1/Snap-104221-Image Export-39.tif	1	TRUE	689.14
LRB420	irld-11 in MY	d1	r1	../d1_r1_irlds/LRB420_d1_r1/Snap-104250-Image Export-68.tif	0	TRUE	730.087
LRB420	irld-11 in MY	d1	r1	../d1_r1_irlds/LRB420_d1_r1/Snap-104250-Image Export-68.tif	2	TRUE	740.575
LRB420	irld-11 in MY	d1	r1	../d1_r1_irlds/LRB420_d1_r1/Snap-104250-Image Export-68.tif	3	TRUE	591.487
LRB420	irld-11 in MY	d1	r1	../d1_r1_irlds/LRB420_d1_r1/Snap-104215-Image Export-33.tif	0	TRUE	733.343
LRB420	irld-11 in MY	d1	r1	../d1_r1_irlds/LRB420_d1_r1/Snap-104215-Image Export-33.tif	1	TRUE	733.029
LRB420	irld-11 in MY	d1	r1	../d1_r1_irlds/LRB420_d1_r1/Snap-104251-Image Export-69.tif	0	TRUE	751.024
LRB420	irld-11 in MY	d1	r1	../d1_r1_irlds/LRB420_d1_r1/Snap-104251-Image Export-69.tif	2	TRUE	738.705
LRB420	irld-11 in MY	d8	r1	../d8_r1_irlds/LRB420_d8_r1/Snap-558-Image Export-20.tif	1	TRUE	485.907
LRB420	irld-11 in MY	d8	r1	../d8_r1_irlds/LRB420_d8_r1/Snap-558-Image Export-20.tif	2	TRUE	330.891
LRB420	irld-11 in MY	d8	r1	../d8_r1_irlds/LRB420_d8_r1/Snap-558-Image Export-20.tif	4	TRUE	506.856
LRB420	irld-11 in MY	d8	r1	../d8_r1_irlds/LRB420_d8_r1/Snap-558-Image Export-20.tif	7	TRUE	337.35
LRB420	irld-11 in MY	d8	r1	../d8_r1_irlds/LRB420_d8_r1/Snap-559-Image Export-21.tif	0	TRUE	348.157
LRB420	irld-11 in MY	d8	r1	../d8_r1_irlds/LRB420_d8_r1/Snap-559-Image Export-21.tif	1	TRUE	450.53
LRB420	irld-11 in MY	d8	r1	../d8_r1_irlds/LRB420_d8_r1/Snap-559-Image Export-21.tif	3	TRUE	522.513
LRB420	irld-11 in MY	d8	r1	../d8_r1_irlds/LRB420_d8_r1/Snap-547-Image Export-09.tif	0	TRUE	300.81
LRB420	irld-11 in MY	d8	r1	../d8_r1_irlds/LRB420_d8_r1/Snap-547-Image Export-09.tif	4	TRUE	440.099
LRB420	irld-11 in MY	d8	r1	../d8_r1_irlds/LRB420_d8_r1/Snap-547-Image Export-09.tif	5	TRUE	435.047
LRB420	irld-11 in MY	d8	r1	../d8_r1_irlds/LRB420_d8_r1/Snap-546-Image Export-08.tif	1	TRUE	362.58
LRB420	irld-11 in MY	d8	r1	../d8_r1_irlds/LRB420_d8_r1/Snap-546-Image Export-08.tif	2	TRUE	427.309
LRB420	irld-11 in MY	d8	r1	../d8_r1_irlds/LRB420_d8_r1/Snap-556-Image Export-18.tif	0	TRUE	445.131
LRB420	irld-11 in MY	d8	r1	../d8_r1_irlds/LRB420_d8_r1/Snap-556-Image Export-18.tif	1	TRUE	482.375
LRB420	irld-11 in MY	d8	r1	../d8_r1_irlds/LRB420_d8_r1/Snap-562-Image Export-24.tif	0	TRUE	466.297
LRB420	irld-11 in MY	d8	r1	../d8_r1_irlds/LRB420_d8_r1/Snap-562-Image Export-24.tif	1	TRUE	404.637
LRB420	irld-11 in MY	d8	r1	../d8_r1_irlds/LRB420_d8_r1/Snap-553-Image Export-15.tif	0	TRUE	494.085
LRB420	irld-11 in MY	d8	r1	../d8_r1_irlds/LRB420_d8_r1/Snap-561-Image Export-23.tif	2	TRUE	471.678
LRB420	irld-11 in MY	d8	r1	../d8_r1_irlds/LRB420_d8_r1/Snap-561-Image Export-23.tif	3	TRUE	437.276
LRB420	irld-11 in MY	d8	r1	../d8_r1_irlds/LRB420_d8_r1/Snap-560-Image Export-22.tif	1	TRUE	442.282
LRB420	irld-11 in MY	d8	r1	../d8_r1_irlds/LRB420_d8_r1/Snap-560-Image Export-22.tif	2	TRUE	439.504
LRB420	irld-11 in MY	d8	r1	../d8_r1_irlds/LRB420_d8_r1/Snap-560-Image Export-22.tif	3	TRUE	476.245
LRB420	irld-11 in MY	d8	r1	../d8_r1_irlds/LRB420_d8_r1/Snap-560-Image Export-22.tif	5	TRUE	325.2
LRB420	irld-11 in MY	d8	r1	../d8_r1_irlds/LRB420_d8_r1/Snap-550-Image Export-12.tif	1	TRUE	453.262
LRB420	irld-11 in MY	d8	r1	../d8_r1_irlds/LRB420_d8_r1/Snap-549-Image Export-11.tif	2	TRUE	374.136
LRB420	irld-11 in MY	d8	r1	../d8_r1_irlds/LRB420_d8_r1/Snap-555-Image Export-17.tif	1	TRUE	478.803
LRB420	irld-11 in MY	d8	r1	../d8_r1_irlds/LRB420_d8_r1/Snap-555-Image Export-17.tif	2	TRUE	450.795
LRB420	irld-11 in MY	d8	r1	../d8_r1_irlds/LRB420_d8_r1/Snap-548-Image Export-10.tif	0	TRUE	477.724
LRB420	irld-11 in MY	d8	r1	../d8_r1_irlds/LRB420_d8_r1/Snap-548-Image Export-10.tif	1	TRUE	388.34
LRB420	irld-11 in MY	d8	r1	../d8_r1_irlds/LRB420_d8_r1/Snap-548-Image Export-10.tif	2	TRUE	395.045
LRB420	irld-11 in MY	d8	r1	../d8_r1_irlds/LRB420_d8_r1/Snap-548-Image Export-10.tif	5	TRUE	327.913
LRB420	irld-11 in MY	d8	r1	../d8_r1_irlds/LRB420_d8_r1/Snap-548-Image Export-10.tif	7	TRUE	485.599
LRB420	irld-11 in MY	d8	r1	../d8_r1_irlds/LRB420_d8_r1/Snap-548-Image Export-10.tif	8	TRUE	388.87
LRB420	irld-11 in MY	d8	r1	../d8_r1_irlds/LRB420_d8_r1/Snap-554-Image Export-16.tif	1	TRUE	394.671
LRB420	irld-11 in MY	d8	r1	../d8_r1_irlds/LRB420_d8_r1/Snap-554-Image Export-16.tif	3	TRUE	291.018
LRB420	irld-11 in MY	d8	r1	../d8_r1_irlds/LRB420_d8_r1/Snap-554-Image Export-16.tif	4	TRUE	353.053
LRB420	irld-11 in MY	d8	r1	../d8_r1_irlds/LRB420_d8_r1/Snap-541-Image Export-03.tif	0	TRUE	416.787
LRB420	irld-11 in MY	d8	r1	../d8_r1_irlds/LRB420_d8_r1/Snap-545-Image Export-07.tif	0	TRUE	492.523
LRB420	irld-11 in MY	d8	r1	../d8_r1_irlds/LRB420_d8_r1/Snap-544-Image Export-06.tif	0	TRUE	404.281
LRB420	irld-11 in MY	d8	r1	../d8_r1_irlds/LRB420_d8_r1/Snap-544-Image Export-06.tif	2	TRUE	510.208
LRB420	irld-11 in MY	d8	r1	../d8_r1_irlds/LRB420_d8_r1/Snap-542-Image Export-04.tif	0	TRUE	460.468
LRB420	irld-11 in MY	d8	r1	../d8_r1_irlds/LRB420_d8_r1/Snap-542-Image Export-04.tif	1	TRUE	487.426
LRB420	irld-11 in MY	d8	r1	../d8_r1_irlds/LRB420_d8_r1/Snap-543-Image Export-05.tif	0	TRUE	338.236
LRB420	irld-11 in MY	d8	r1	../d8_r1_irlds/LRB420_d8_r1/Snap-543-Image Export-05.tif	1	TRUE	314.33
LRB420	irld-11 in MY	d8	r1	../d8_r1_irlds/LRB420_d8_r1/Snap-543-Image Export-05.tif	2	TRUE	437.166
LRB420	irld-11 in MY	d1	r2	../d1_r2_irlds/LRB420_d1_r2/Snap-105198-Image Export-15.tif	0	TRUE	761.565
LRB420	irld-11 in MY	d1	r2	../d1_r2_irlds/LRB420_d1_r2/Snap-105198-Image Export-15.tif	1	TRUE	675.787
LRB420	irld-11 in MY	d1	r2	../d1_r2_irlds/LRB420_d1_r2/Snap-105225-Image Export-42.tif	0	TRUE	772.237
LRB420	irld-11 in MY	d1	r2	../d1_r2_irlds/LRB420_d1_r2/Snap-105187-Image Export-04.tif	0	TRUE	731.382
LRB420	irld-11 in MY	d1	r2	../d1_r2_irlds/LRB420_d1_r2/Snap-105187-Image Export-04.tif	1	TRUE	637.521
LRB420	irld-11 in MY	d1	r2	../d1_r2_irlds/LRB420_d1_r2/Snap-105200-Image Export-17.tif	1	TRUE	734.193
LRB420	irld-11 in MY	d1	r2	../d1_r2_irlds/LRB420_d1_r2/Snap-105243-Image Export-60.tif	0	TRUE	746.251
LRB420	irld-11 in MY	d1	r2	../d1_r2_irlds/LRB420_d1_r2/Snap-105243-Image Export-60.tif	1	TRUE	742.812
LRB420	irld-11 in MY	d1	r2	../d1_r2_irlds/LRB420_d1_r2/Snap-105243-Image Export-60.tif	2	TRUE	755.758
LRB420	irld-11 in MY	d1	r2	../d1_r2_irlds/LRB420_d1_r2/Snap-105243-Image Export-60.tif	3	TRUE	659.714
LRB420	irld-11 in MY	d1	r2	../d1_r2_irlds/LRB420_d1_r2/Snap-105224-Image Export-41.tif	0	TRUE	762.546
LRB420	irld-11 in MY	d1	r2	../d1_r2_irlds/LRB420_d1_r2/Snap-105224-Image Export-41.tif	1	TRUE	718.787
LRB420	irld-11 in MY	d1	r2	../d1_r2_irlds/LRB420_d1_r2/Snap-105199-Image Export-16.tif	0	TRUE	761.251
LRB420	irld-11 in MY	d1	r2	../d1_r2_irlds/LRB420_d1_r2/Snap-105199-Image Export-16.tif	1	TRUE	707.579
LRB420	irld-11 in MY	d1	r2	../d1_r2_irlds/LRB420_d1_r2/Snap-105186-Image Export-03.tif	0	TRUE	800.942
LRB420	irld-11 in MY	d1	r2	../d1_r2_irlds/LRB420_d1_r2/Snap-105186-Image Export-03.tif	1	TRUE	754.686
LRB420	irld-11 in MY	d1	r2	../d1_r2_irlds/LRB420_d1_r2/Snap-105238-Image Export-55.tif	0	TRUE	718.473
LRB420	irld-11 in MY	d1	r2	../d1_r2_irlds/LRB420_d1_r2/Snap-105241-Image Export-58.tif	0	TRUE	769.426
LRB420	irld-11 in MY	d1	r2	../d1_r2_irlds/LRB420_d1_r2/Snap-105241-Image Export-58.tif	1	TRUE	689.14
LRB420	irld-11 in MY	d1	r2	../d1_r2_irlds/LRB420_d1_r2/Snap-105185-Image Export-02.tif	0	TRUE	726.203
LRB420	irld-11 in MY	d1	r2	../d1_r2_irlds/LRB420_d1_r2/Snap-105185-Image Export-02.tif	1	TRUE	598.182
LRB420	irld-11 in MY	d1	r2	../d1_r2_irlds/LRB420_d1_r2/Snap-105185-Image Export-02.tif	2	TRUE	654.85
LRB420	irld-11 in MY	d1	r2	../d1_r2_irlds/LRB420_d1_r2/Snap-105233-Image Export-50.tif	0	TRUE	727.536
LRB420	irld-11 in MY	d1	r2	../d1_r2_irlds/LRB420_d1_r2/Snap-105233-Image Export-50.tif	1	TRUE	766.836
LRB420	irld-11 in MY	d1	r2	../d1_r2_irlds/LRB420_d1_r2/Snap-105196-Image Export-13.tif	0	TRUE	767.28
LRB420	irld-11 in MY	d1	r2	../d1_r2_irlds/LRB420_d1_r2/Snap-105212-Image Export-29.tif	0	TRUE	719.323
LRB420	irld-11 in MY	d1	r2	../d1_r2_irlds/LRB420_d1_r2/Snap-105194-Image Export-11.tif	0	TRUE	700.57
LRB420	irld-11 in MY	d1	r2	../d1_r2_irlds/LRB420_d1_r2/Snap-105195-Image Export-12.tif	1	TRUE	732.232
LRB420	irld-11 in MY	d1	r2	../d1_r2_irlds/LRB420_d1_r2/Snap-105237-Image Export-54.tif	1	TRUE	684.497
LRB420	irld-11 in MY	d1	r2	../d1_r2_irlds/LRB420_d1_r2/Snap-105237-Image Export-54.tif	2	TRUE	649.801
LRB420	irld-11 in MY	d1	r2	../d1_r2_irlds/LRB420_d1_r2/Snap-105237-Image Export-54.tif	3	TRUE	672.217
LRB420	irld-11 in MY	d1	r2	../d1_r2_irlds/LRB420_d1_r2/Snap-105235-Image Export-52.tif	0	TRUE	619.395
LRB420	irld-11 in MY	d1	r2	../d1_r2_irlds/LRB420_d1_r2/Snap-105235-Image Export-52.tif	1	TRUE	703.159
LRB420	irld-11 in MY	d1	r2	../d1_r2_irlds/LRB420_d1_r2/Snap-105197-Image Export-14.tif	0	TRUE	792.508
LRB420	irld-11 in MY	d1	r2	../d1_r2_irlds/LRB420_d1_r2/Snap-105188-Image Export-05.tif	0	TRUE	719.952
LRB420	irld-11 in MY	d1	r2	../d1_r2_irlds/LRB420_d1_r2/Snap-105188-Image Export-05.tif	1	TRUE	740.667
LRB420	irld-11 in MY	d1	r2	../d1_r2_irlds/LRB420_d1_r2/Snap-105188-Image Export-05.tif	2	TRUE	683.517
LRB420	irld-11 in MY	d1	r2	../d1_r2_irlds/LRB420_d1_r2/Snap-105188-Image Export-05.tif	3	TRUE	717.623
LRB420	irld-11 in MY	d1	r2	../d1_r2_irlds/LRB420_d1_r2/Snap-105220-Image Export-37.tif	0	TRUE	704.009
LRB420	irld-11 in MY	d1	r2	../d1_r2_irlds/LRB420_d1_r2/Snap-105193-Image Export-10.tif	0	TRUE	776.473
LRB420	irld-11 in MY	d1	r2	../d1_r2_irlds/LRB420_d1_r2/Snap-105193-Image Export-10.tif	1	TRUE	781.522
LRB420	irld-11 in MY	d1	r2	../d1_r2_irlds/LRB420_d1_r2/Snap-105189-Image Export-06.tif	0	TRUE	663.376
LRB420	irld-11 in MY	d1	r2	../d1_r2_irlds/LRB420_d1_r2/Snap-105234-Image Export-51.tif	0	TRUE	740.352
LRB420	irld-11 in MY	d1	r2	../d1_r2_irlds/LRB420_d1_r2/Snap-105234-Image Export-51.tif	1	TRUE	602.472
LRB420	irld-11 in MY	d1	r2	../d1_r2_irlds/LRB420_d1_r2/Snap-105234-Image Export-51.tif	2	TRUE	674.14
LRB420	irld-11 in MY	d1	r2	../d1_r2_irlds/LRB420_d1_r2/Snap-105214-Image Export-31.tif	2	TRUE	725.483
LRB420	irld-11 in MY	d1	r2	../d1_r2_irlds/LRB420_d1_r2/Snap-105222-Image Export-39.tif	0	TRUE	783.889
LRB420	irld-11 in MY	d1	r2	../d1_r2_irlds/LRB420_d1_r2/Snap-105222-Image Export-39.tif	1	TRUE	741.019
LRB420	irld-11 in MY	d1	r2	../d1_r2_irlds/LRB420_d1_r2/Snap-105216-Image Export-33.tif	0	TRUE	703.029
LRB420	irld-11 in MY	d1	r2	../d1_r2_irlds/LRB420_d1_r2/Snap-105221-Image Export-38.tif	0	TRUE	762.638
LRB420	irld-11 in MY	d1	r2	../d1_r2_irlds/LRB420_d1_r2/Snap-105215-Image Export-32.tif	0	TRUE	688.826
LRB420	irld-11 in MY	d1	r2	../d1_r2_irlds/LRB420_d1_r2/Snap-105215-Image Export-32.tif	1	TRUE	757.681
LRB420	irld-11 in MY	d1	r2	../d1_r2_irlds/LRB420_d1_r2/Snap-105208-Image Export-25.tif	0	TRUE	720.396
LRB420	irld-11 in MY	d1	r2	../d1_r2_irlds/LRB420_d1_r2/Snap-105208-Image Export-25.tif	1	TRUE	755.314
LRB420	irld-11 in MY	d1	r2	../d1_r2_irlds/LRB420_d1_r2/Snap-105208-Image Export-25.tif	3	TRUE	748.435
LRB420	irld-11 in MY	d1	r2	../d1_r2_irlds/LRB420_d1_r2/Snap-105232-Image Export-49.tif	0	TRUE	684.941
LRB420	irld-11 in MY	d1	r2	../d1_r2_irlds/LRB420_d1_r2/Snap-105213-Image Export-30.tif	0	TRUE	775.715
LRB420	irld-11 in MY	d1	r2	../d1_r2_irlds/LRB420_d1_r2/Snap-105213-Image Export-30.tif	1	TRUE	730.125
LRB420	irld-11 in MY	d1	r2	../d1_r2_irlds/LRB420_d1_r2/Snap-105213-Image Export-30.tif	2	TRUE	725.575
LRB420	irld-11 in MY	d1	r2	../d1_r2_irlds/LRB420_d1_r2/Snap-105209-Image Export-26.tif	2	TRUE	741.425
LRB420	irld-11 in MY	d1	r2	../d1_r2_irlds/LRB420_d1_r2/Snap-105209-Image Export-26.tif	3	TRUE	722.781
LRB420	irld-11 in MY	d1	r2	../d1_r2_irlds/LRB420_d1_r2/Snap-105207-Image Export-24.tif	0	TRUE	750.58
LRB420	irld-11 in MY	d1	r2	../d1_r2_irlds/LRB420_d1_r2/Snap-105207-Image Export-24.tif	1	TRUE	769.241
LRB420	irld-11 in MY	d1	r2	../d1_r2_irlds/LRB420_d1_r2/Snap-105203-Image Export-20.tif	0	TRUE	756.073
LRB420	irld-11 in MY	d1	r2	../d1_r2_irlds/LRB420_d1_r2/Snap-105219-Image Export-36.tif	0	TRUE	764.783
LRB420	irld-11 in MY	d1	r2	../d1_r2_irlds/LRB420_d1_r2/Snap-105206-Image Export-23.tif	0	TRUE	759.865
LRB420	irld-11 in MY	d1	r2	../d1_r2_irlds/LRB420_d1_r2/Snap-105202-Image Export-19.tif	0	TRUE	746.067
LRB420	irld-11 in MY	d1	r2	../d1_r2_irlds/LRB420_d1_r2/Snap-105204-Image Export-21.tif	0	TRUE	662.84
LRB420	irld-11 in MY	d1	r2	../d1_r2_irlds/LRB420_d1_r2/Snap-105204-Image Export-21.tif	1	TRUE	720.71
LRB420	irld-11 in MY	d1	r2	../d1_r2_irlds/LRB420_d1_r2/Snap-105205-Image Export-22.tif	0	TRUE	691.729
LRB420	irld-11 in MY	d1	r2	../d1_r2_irlds/LRB420_d1_r2/Snap-105205-Image Export-22.tif	1	TRUE	692.894
LRB420	irld-11 in MY	d1	r2	../d1_r2_irlds/LRB420_d1_r2/Snap-105205-Image Export-22.tif	2	TRUE	752.633
LRB420	irld-11 in MY	d1	r2	../d1_r2_irlds/LRB420_d1_r2/Snap-105201-Image Export-18.tif	0	TRUE	749.821
LRB420	irld-11 in MY	d1	r2	../d1_r2_irlds/LRB420_d1_r2/Snap-105201-Image Export-18.tif	1	TRUE	801.085
LRB420	irld-11 in MY	d1	r2	../d1_r2_irlds/LRB420_d1_r2/Snap-105201-Image Export-18.tif	2	TRUE	752.947
LRB420	irld-11 in MY	d8	r2	../d8_r2_irlds/LRB420_d8_r2/Snap-86-Image Export-35.tif	0	TRUE	321.958
LRB420	irld-11 in MY	d8	r2	../d8_r2_irlds/LRB420_d8_r2/Snap-70-Image Export-19.tif	0	TRUE	357.73
LRB420	irld-11 in MY	d8	r2	../d8_r2_irlds/LRB420_d8_r2/Snap-85-Image Export-34.tif	0	TRUE	392.177
LRB420	irld-11 in MY	d8	r2	../d8_r2_irlds/LRB420_d8_r2/Snap-82-Image Export-31.tif	0	TRUE	430.352
LRB420	irld-11 in MY	d8	r2	../d8_r2_irlds/LRB420_d8_r2/Snap-82-Image Export-31.tif	1	TRUE	315.563
LRB420	irld-11 in MY	d8	r2	../d8_r2_irlds/LRB420_d8_r2/Snap-74-Image Export-23.tif	0	TRUE	473.577
LRB420	irld-11 in MY	d8	r2	../d8_r2_irlds/LRB420_d8_r2/Snap-74-Image Export-23.tif	2	TRUE	405.696
LRB420	irld-11 in MY	d8	r2	../d8_r2_irlds/LRB420_d8_r2/Snap-95-Image Export-44.tif	0	TRUE	375.195
LRB420	irld-11 in MY	d8	r2	../d8_r2_irlds/LRB420_d8_r2/Snap-92-Image Export-41.tif	1	TRUE	450.421
LRB420	irld-11 in MY	d8	r2	../d8_r2_irlds/LRB420_d8_r2/Snap-97-Image Export-46.tif	0	TRUE	311.352
LRB420	irld-11 in MY	d8	r2	../d8_r2_irlds/LRB420_d8_r2/Snap-97-Image Export-46.tif	1	TRUE	412.201
LRB420	irld-11 in MY	d8	r2	../d8_r2_irlds/LRB420_d8_r2/Snap-91-Image Export-40.tif	0	TRUE	325.246
LRB420	irld-11 in MY	d8	r2	../d8_r2_irlds/LRB420_d8_r2/Snap-91-Image Export-40.tif	1	TRUE	364.654
LRB420	irld-11 in MY	d8	r2	../d8_r2_irlds/LRB420_d8_r2/Snap-75-Image Export-24.tif	0	TRUE	306.894
LRB420	irld-11 in MY	d8	r2	../d8_r2_irlds/LRB420_d8_r2/Snap-93-Image Export-42.tif	0	TRUE	224.196
LRB420	irld-11 in MY	d8	r2	../d8_r2_irlds/LRB420_d8_r2/Snap-84-Image Export-33.tif	0	TRUE	375.15
LRB420	irld-11 in MY	d8	r2	../d8_r2_irlds/LRB420_d8_r2/Snap-56-Image Export-05.tif	1	TRUE	215.263
LRB420	irld-11 in MY	d8	r2	../d8_r2_irlds/LRB420_d8_r2/Snap-98-Image Export-47.tif	1	TRUE	336.272
LRB420	irld-11 in MY	d8	r2	../d8_r2_irlds/LRB420_d8_r2/Snap-78-Image Export-27.tif	0	TRUE	327.319
LRB420	irld-11 in MY	d8	r2	../d8_r2_irlds/LRB420_d8_r2/Snap-60-Image Export-09.tif	0	TRUE	305.067
LRB420	irld-11 in MY	d8	r2	../d8_r2_irlds/LRB420_d8_r2/Snap-60-Image Export-09.tif	1	TRUE	273.332
LRB420	irld-11 in MY	d8	r2	../d8_r2_irlds/LRB420_d8_r2/Snap-61-Image Export-10.tif	0	TRUE	325.931
LRB420	irld-11 in MY	d8	r2	../d8_r2_irlds/LRB420_d8_r2/Snap-67-Image Export-16.tif	0	TRUE	399.101
LRB420	irld-11 in MY	d8	r2	../d8_r2_irlds/LRB420_d8_r2/Snap-62-Image Export-11.tif	0	TRUE	433.749
LRB420	irld-11 in MY	d8	r2	../d8_r2_irlds/LRB420_d8_r2/Snap-65-Image Export-14.tif	0	TRUE	314.704
LRB420	irld-11 in MY	d8	r2	../d8_r2_irlds/LRB420_d8_r2/Snap-99-Image Export-48.tif	0	TRUE	278.403
LRB420	irld-11 in MY	d8	r2	../d8_r2_irlds/LRB420_d8_r2/Snap-79-Image Export-28.tif	0	TRUE	291.392
LRB420	irld-11 in MY	d8	r2	../d8_r2_irlds/LRB420_d8_r2/Snap-59-Image Export-08.tif	0	TRUE	255.621
LRB420	irld-11 in MY	d8	r2	../d8_r2_irlds/LRB420_d8_r2/Snap-68-Image Export-17.tif	0	TRUE	375.241
LRB420	irld-11 in MY	d1	r3	../d1_r3_irlds/LRB420_d1_r3/Snap-106423-Image Export-19.tif	0	TRUE	782.909
LRB420	irld-11 in MY	d1	r3	../d1_r3_irlds/LRB420_d1_r3/Snap-106423-Image Export-19.tif	1	TRUE	759.734
LRB420	irld-11 in MY	d1	r3	../d1_r3_irlds/LRB420_d1_r3/Snap-106423-Image Export-19.tif	2	TRUE	811.614
LRB420	irld-11 in MY	d1	r3	../d1_r3_irlds/LRB420_d1_r3/Snap-106425-Image Export-21.tif	0	TRUE	772.773
LRB420	irld-11 in MY	d1	r3	../d1_r3_irlds/LRB420_d1_r3/Snap-106425-Image Export-21.tif	1	TRUE	762.546
LRB420	irld-11 in MY	d1	r3	../d1_r3_irlds/LRB420_d1_r3/Snap-106422-Image Export-18.tif	0	TRUE	773.57
LRB420	irld-11 in MY	d1	r3	../d1_r3_irlds/LRB420_d1_r3/Snap-106422-Image Export-18.tif	1	TRUE	775.991
LRB420	irld-11 in MY	d1	r3	../d1_r3_irlds/LRB420_d1_r3/Snap-106417-Image Export-13.tif	0	TRUE	763.342
LRB420	irld-11 in MY	d1	r3	../d1_r3_irlds/LRB420_d1_r3/Snap-106417-Image Export-13.tif	1	TRUE	792.508
LRB420	irld-11 in MY	d1	r3	../d1_r3_irlds/LRB420_d1_r3/Snap-106427-Image Export-23.tif	0	TRUE	725.889
LRB420	irld-11 in MY	d1	r3	../d1_r3_irlds/LRB420_d1_r3/Snap-106439-Image Export-35.tif	0	TRUE	760.179
LRB420	irld-11 in MY	d1	r3	../d1_r3_irlds/LRB420_d1_r3/Snap-106439-Image Export-35.tif	1	TRUE	784.203
LRB420	irld-11 in MY	d1	r3	../d1_r3_irlds/LRB420_d1_r3/Snap-106439-Image Export-35.tif	2	TRUE	748.028
LRB420	irld-11 in MY	d1	r3	../d1_r3_irlds/LRB420_d1_r3/Snap-106439-Image Export-35.tif	3	TRUE	723.744
LRB420	irld-11 in MY	d1	r3	../d1_r3_irlds/LRB420_d1_r3/Snap-106442-Image Export-38.tif	0	TRUE	798
LRB420	irld-11 in MY	d1	r3	../d1_r3_irlds/LRB420_d1_r3/Snap-106442-Image Export-38.tif	1	TRUE	775.585
LRB420	irld-11 in MY	d1	r3	../d1_r3_irlds/LRB420_d1_r3/Snap-106442-Image Export-38.tif	2	TRUE	761.826
LRB420	irld-11 in MY	d1	r3	../d1_r3_irlds/LRB420_d1_r3/Snap-106442-Image Export-38.tif	3	TRUE	772.237
LRB420	irld-11 in MY	d1	r3	../d1_r3_irlds/LRB420_d1_r3/Snap-106410-Image Export-06.tif	0	TRUE	774.642
LRB420	irld-11 in MY	d1	r3	../d1_r3_irlds/LRB420_d1_r3/Snap-106443-Image Export-39.tif	0	TRUE	644.4
LRB420	irld-11 in MY	d1	r3	../d1_r3_irlds/LRB420_d1_r3/Snap-106443-Image Export-39.tif	1	TRUE	781.3
LRB420	irld-11 in MY	d1	r3	../d1_r3_irlds/LRB420_d1_r3/Snap-106443-Image Export-39.tif	2	TRUE	704.676
LRB420	irld-11 in MY	d1	r3	../d1_r3_irlds/LRB420_d1_r3/Snap-106443-Image Export-39.tif	3	TRUE	768.483
LRB420	irld-11 in MY	d1	r3	../d1_r3_irlds/LRB420_d1_r3/Snap-106443-Image Export-39.tif	4	TRUE	706.821
LRB420	irld-11 in MY	d1	r3	../d1_r3_irlds/LRB420_d1_r3/Snap-106411-Image Export-07.tif	0	TRUE	780.855
LRB420	irld-11 in MY	d1	r3	../d1_r3_irlds/LRB420_d1_r3/Snap-106411-Image Export-07.tif	2	TRUE	768.261
LRB420	irld-11 in MY	d1	r3	../d1_r3_irlds/LRB420_d1_r3/Snap-106418-Image Export-14.tif	0	TRUE	769.556
LRB420	irld-11 in MY	d1	r3	../d1_r3_irlds/LRB420_d1_r3/Snap-106418-Image Export-14.tif	1	TRUE	768.039
LRB420	irld-11 in MY	d1	r3	../d1_r3_irlds/LRB420_d1_r3/Snap-106418-Image Export-14.tif	2	TRUE	774.918
LRB420	irld-11 in MY	d1	r3	../d1_r3_irlds/LRB420_d1_r3/Snap-106418-Image Export-14.tif	3	TRUE	773.662
LRB420	irld-11 in MY	d1	r3	../d1_r3_irlds/LRB420_d1_r3/Snap-106419-Image Export-15.tif	0	TRUE	764.155
LRB420	irld-11 in MY	d1	r3	../d1_r3_irlds/LRB420_d1_r3/Snap-106419-Image Export-15.tif	1	TRUE	775.048
LRB420	irld-11 in MY	d1	r3	../d1_r3_irlds/LRB420_d1_r3/Snap-106428-Image Export-24.tif	0	TRUE	693.56
LRB420	irld-11 in MY	d1	r3	../d1_r3_irlds/LRB420_d1_r3/Snap-106428-Image Export-24.tif	1	TRUE	727.628
LRB420	irld-11 in MY	d1	r3	../d1_r3_irlds/LRB420_d1_r3/Snap-106429-Image Export-25.tif	0	TRUE	732.048
LRB420	irld-11 in MY	d1	r3	../d1_r3_irlds/LRB420_d1_r3/Snap-106437-Image Export-33.tif	0	TRUE	792.416
LRB420	irld-11 in MY	d1	r3	../d1_r3_irlds/LRB420_d1_r3/Snap-106437-Image Export-33.tif	1	TRUE	820.806
LRB420	irld-11 in MY	d1	r3	../d1_r3_irlds/LRB420_d1_r3/Snap-106437-Image Export-33.tif	2	TRUE	805.362
LRB420	irld-11 in MY	d1	r3	../d1_r3_irlds/LRB420_d1_r3/Snap-106437-Image Export-33.tif	3	TRUE	755.889
LRB420	irld-11 in MY	d1	r3	../d1_r3_irlds/LRB420_d1_r3/Snap-106405-Image Export-01.tif	2	TRUE	709.188
LRB420	irld-11 in MY	d1	r3	../d1_r3_irlds/LRB420_d1_r3/Snap-106405-Image Export-01.tif	3	TRUE	812.556
LRB420	irld-11 in MY	d1	r3	../d1_r3_irlds/LRB420_d1_r3/Snap-106406-Image Export-02.tif	0	TRUE	775.623
LRB420	irld-11 in MY	d1	r3	../d1_r3_irlds/LRB420_d1_r3/Snap-106406-Image Export-02.tif	1	TRUE	744.42
LRB420	irld-11 in MY	d1	r3	../d1_r3_irlds/LRB420_d1_r3/Snap-106435-Image Export-31.tif	0	TRUE	726.869
LRB420	irld-11 in MY	d1	r3	../d1_r3_irlds/LRB420_d1_r3/Snap-106435-Image Export-31.tif	1	TRUE	760.715
LRB420	irld-11 in MY	d1	r3	../d1_r3_irlds/LRB420_d1_r3/Snap-106444-Image Export-40.tif	0	TRUE	800.59
LRB420	irld-11 in MY	d1	r3	../d1_r3_irlds/LRB420_d1_r3/Snap-106444-Image Export-40.tif	1	TRUE	793.044
LRB420	irld-11 in MY	d1	r3	../d1_r3_irlds/LRB420_d1_r3/Snap-106444-Image Export-40.tif	2	TRUE	766.652
LRB420	irld-11 in MY	d1	r3	../d1_r3_irlds/LRB420_d1_r3/Snap-106432-Image Export-28.tif	0	TRUE	743.57
LRB420	irld-11 in MY	d1	r3	../d1_r3_irlds/LRB420_d1_r3/Snap-106432-Image Export-28.tif	1	TRUE	767.855
LRB420	irld-11 in MY	d1	r3	../d1_r3_irlds/LRB420_d1_r3/Snap-106445-Image Export-41.tif	0	TRUE	790.899
LRB420	irld-11 in MY	d1	r3	../d1_r3_irlds/LRB420_d1_r3/Snap-106445-Image Export-41.tif	1	TRUE	749.285
LRB420	irld-11 in MY	d1	r3	../d1_r3_irlds/LRB420_d1_r3/Snap-106447-Image Export-43.tif	0	TRUE	605.246
LRB420	irld-11 in MY	d1	r3	../d1_r3_irlds/LRB420_d1_r3/Snap-106440-Image Export-36.tif	0	TRUE	743.478
LRB420	irld-11 in MY	d1	r3	../d1_r3_irlds/LRB420_d1_r3/Snap-106440-Image Export-36.tif	1	TRUE	777.01
LRB420	irld-11 in MY	d1	r3	../d1_r3_irlds/LRB420_d1_r3/Snap-106440-Image Export-36.tif	2	TRUE	740.667
LRB420	irld-11 in MY	d1	r3	../d1_r3_irlds/LRB420_d1_r3/Snap-106440-Image Export-36.tif	7	TRUE	787.329
LRB420	irld-11 in MY	d1	r3	../d1_r3_irlds/LRB420_d1_r3/Snap-106412-Image Export-08.tif	0	TRUE	741.869
LRB420	irld-11 in MY	d1	r3	../d1_r3_irlds/LRB420_d1_r3/Snap-106441-Image Export-37.tif	0	TRUE	762.86
LRB420	irld-11 in MY	d1	r3	../d1_r3_irlds/LRB420_d1_r3/Snap-106441-Image Export-37.tif	1	TRUE	709.816
LRB420	irld-11 in MY	d1	r3	../d1_r3_irlds/LRB420_d1_r3/Snap-106441-Image Export-37.tif	2	TRUE	727.498
LRB420	irld-11 in MY	d1	r3	../d1_r3_irlds/LRB420_d1_r3/Snap-106413-Image Export-09.tif	0	TRUE	790.048
LRB420	irld-11 in MY	d1	r3	../d1_r3_irlds/LRB420_d1_r3/Snap-106448-Image Export-44.tif	1	TRUE	749.691
LRB420	irld-11 in MY	d1	r3	../d1_r3_irlds/LRB420_d1_r3/Snap-106448-Image Export-44.tif	2	TRUE	669.942
LRB420	irld-11 in MY	d1	r3	../d1_r3_irlds/LRB420_d1_r3/Snap-106449-Image Export-45.tif	1	TRUE	752.947
LRB420	irld-11 in MY	d1	r3	../d1_r3_irlds/LRB420_d1_r3/Snap-106449-Image Export-45.tif	2	TRUE	766.116
LRB420	irld-11 in MY	d1	r3	../d1_r3_irlds/LRB420_d1_r3/Snap-106421-Image Export-17.tif	0	TRUE	774.642
LRB420	irld-11 in MY	d8	r3	../d8_r3_irlds/LRB420_d8_r3/Snap-583-Image Export-04.tif	0	TRUE	374.757
LRB420	irld-11 in MY	d8	r3	../d8_r3_irlds/LRB420_d8_r3/Snap-581-Image Export-02.tif	0	TRUE	273.991
LRB420	irld-11 in MY	d8	r3	../d8_r3_irlds/LRB420_d8_r3/Snap-582-Image Export-03.tif	0	TRUE	307.935
LRB420	irld-11 in MY	d1	r4	../d1_r4_irlds/LRB420_d1_r4/Snap-230-Image Export-55.tif	0	TRUE	781.652
LRB420	irld-11 in MY	d1	r4	../d1_r4_irlds/LRB420_d1_r4/Snap-230-Image Export-55.tif	1	TRUE	796.928
LRB420	irld-11 in MY	d1	r4	../d1_r4_irlds/LRB420_d1_r4/Snap-230-Image Export-55.tif	2	TRUE	767.372
LRB420	irld-11 in MY	d1	r4	../d1_r4_irlds/LRB420_d1_r4/Snap-232-Image Export-57.tif	0	TRUE	813.851
LRB420	irld-11 in MY	d1	r4	../d1_r4_irlds/LRB420_d1_r4/Snap-232-Image Export-57.tif	1	TRUE	769.019
LRB420	irld-11 in MY	d1	r4	../d1_r4_irlds/LRB420_d1_r4/Snap-232-Image Export-57.tif	2	TRUE	739.02
LRB420	irld-11 in MY	d1	r4	../d1_r4_irlds/LRB420_d1_r4/Snap-229-Image Export-54.tif	0	TRUE	781.744
LRB420	irld-11 in MY	d1	r4	../d1_r4_irlds/LRB420_d1_r4/Snap-248-Image Export-73.tif	0	TRUE	841.759
LRB420	irld-11 in MY	d1	r4	../d1_r4_irlds/LRB420_d1_r4/Snap-248-Image Export-73.tif	1	TRUE	803.938
LRB420	irld-11 in MY	d1	r4	../d1_r4_irlds/LRB420_d1_r4/Snap-248-Image Export-73.tif	2	TRUE	789.604
LRB420	irld-11 in MY	d1	r4	../d1_r4_irlds/LRB420_d1_r4/Snap-179-Image Export-04.tif	0	TRUE	772.145
LRB420	irld-11 in MY	d1	r4	../d1_r4_irlds/LRB420_d1_r4/Snap-179-Image Export-04.tif	2	TRUE	666.594
LRB420	irld-11 in MY	d1	r4	../d1_r4_irlds/LRB420_d1_r4/Snap-213-Image Export-38.tif	0	TRUE	819.474
LRB420	irld-11 in MY	d1	r4	../d1_r4_irlds/LRB420_d1_r4/Snap-213-Image Export-38.tif	2	TRUE	689.14
LRB420	irld-11 in MY	d1	r4	../d1_r4_irlds/LRB420_d1_r4/Snap-214-Image Export-39.tif	0	TRUE	781.744
LRB420	irld-11 in MY	d1	r4	../d1_r4_irlds/LRB420_d1_r4/Snap-191-Image Export-16.tif	0	TRUE	782.909
LRB420	irld-11 in MY	d1	r4	../d1_r4_irlds/LRB420_d1_r4/Snap-191-Image Export-16.tif	1	TRUE	826.667
LRB420	irld-11 in MY	d1	r4	../d1_r4_irlds/LRB420_d1_r4/Snap-191-Image Export-16.tif	2	TRUE	798.537
LRB420	irld-11 in MY	d1	r4	../d1_r4_irlds/LRB420_d1_r4/Snap-191-Image Export-16.tif	3	TRUE	791.213
LRB420	irld-11 in MY	d1	r4	../d1_r4_irlds/LRB420_d1_r4/Snap-191-Image Export-16.tif	4	TRUE	796.43
LRB420	irld-11 in MY	d1	r4	../d1_r4_irlds/LRB420_d1_r4/Snap-228-Image Export-53.tif	0	TRUE	794.469
LRB420	irld-11 in MY	d1	r4	../d1_r4_irlds/LRB420_d1_r4/Snap-228-Image Export-53.tif	1	TRUE	794.561
LRB420	irld-11 in MY	d1	r4	../d1_r4_irlds/LRB420_d1_r4/Snap-228-Image Export-53.tif	2	TRUE	804.696
LRB420	irld-11 in MY	d1	r4	../d1_r4_irlds/LRB420_d1_r4/Snap-228-Image Export-53.tif	3	TRUE	767.817
LRB420	irld-11 in MY	d1	r4	../d1_r4_irlds/LRB420_d1_r4/Snap-249-Image Export-74.tif	0	TRUE	765.043
LRB420	irld-11 in MY	d1	r4	../d1_r4_irlds/LRB420_d1_r4/Snap-249-Image Export-74.tif	1	TRUE	835.194
LRB420	irld-11 in MY	d1	r4	../d1_r4_irlds/LRB420_d1_r4/Snap-190-Image Export-15.tif	0	TRUE	807.638
LRB420	irld-11 in MY	d1	r4	../d1_r4_irlds/LRB420_d1_r4/Snap-190-Image Export-15.tif	1	TRUE	755.222
LRB420	irld-11 in MY	d1	r4	../d1_r4_irlds/LRB420_d1_r4/Snap-178-Image Export-03.tif	0	TRUE	787.551
LRB420	irld-11 in MY	d1	r4	../d1_r4_irlds/LRB420_d1_r4/Snap-178-Image Export-03.tif	1	TRUE	781.522
LRB420	irld-11 in MY	d1	r4	../d1_r4_irlds/LRB420_d1_r4/Snap-189-Image Export-14.tif	0	TRUE	788.884
LRB420	irld-11 in MY	d1	r4	../d1_r4_irlds/LRB420_d1_r4/Snap-189-Image Export-14.tif	1	TRUE	780.319
LRB420	irld-11 in MY	d1	r4	../d1_r4_irlds/LRB420_d1_r4/Snap-189-Image Export-14.tif	2	TRUE	773.087
LRB420	irld-11 in MY	d1	r4	../d1_r4_irlds/LRB420_d1_r4/Snap-189-Image Export-14.tif	3	TRUE	784.425
LRB420	irld-11 in MY	d1	r4	../d1_r4_irlds/LRB420_d1_r4/Snap-250-Image Export-75.tif	2	TRUE	749.821
LRB420	irld-11 in MY	d1	r4	../d1_r4_irlds/LRB420_d1_r4/Snap-192-Image Export-17.tif	0	TRUE	800.904
LRB420	irld-11 in MY	d1	r4	../d1_r4_irlds/LRB420_d1_r4/Snap-225-Image Export-50.tif	0	TRUE	773.126
LRB420	irld-11 in MY	d1	r4	../d1_r4_irlds/LRB420_d1_r4/Snap-225-Image Export-50.tif	1	TRUE	819.436
LRB420	irld-11 in MY	d1	r4	../d1_r4_irlds/LRB420_d1_r4/Snap-181-Image Export-06.tif	0	TRUE	818.271
LRB420	irld-11 in MY	d1	r4	../d1_r4_irlds/LRB420_d1_r4/Snap-181-Image Export-06.tif	2	TRUE	819.436
LRB420	irld-11 in MY	d1	r4	../d1_r4_irlds/LRB420_d1_r4/Snap-181-Image Export-06.tif	3	TRUE	719.638
LRB420	irld-11 in MY	d1	r4	../d1_r4_irlds/LRB420_d1_r4/Snap-176-Image Export-01.tif	1	TRUE	726.869
LRB420	irld-11 in MY	d1	r4	../d1_r4_irlds/LRB420_d1_r4/Snap-176-Image Export-01.tif	2	TRUE	817.605
LRB420	irld-11 in MY	d1	r4	../d1_r4_irlds/LRB420_d1_r4/Snap-227-Image Export-52.tif	1	TRUE	798.575
LRB420	irld-11 in MY	d1	r4	../d1_r4_irlds/LRB420_d1_r4/Snap-227-Image Export-52.tif	2	TRUE	792.508
LRB420	irld-11 in MY	d1	r4	../d1_r4_irlds/LRB420_d1_r4/Snap-227-Image Export-52.tif	4	TRUE	780.671
LRB420	irld-11 in MY	d1	r4	../d1_r4_irlds/LRB420_d1_r4/Snap-241-Image Export-66.tif	1	TRUE	795.725
LRB420	irld-11 in MY	d1	r4	../d1_r4_irlds/LRB420_d1_r4/Snap-241-Image Export-66.tif	2	TRUE	817.551
LRB420	irld-11 in MY	d1	r4	../d1_r4_irlds/LRB420_d1_r4/Snap-226-Image Export-51.tif	0	TRUE	786.164
LRB420	irld-11 in MY	d1	r4	../d1_r4_irlds/LRB420_d1_r4/Snap-226-Image Export-51.tif	1	TRUE	803.179
LRB420	irld-11 in MY	d1	r4	../d1_r4_irlds/LRB420_d1_r4/Snap-226-Image Export-51.tif	2	TRUE	774.642
LRB420	irld-11 in MY	d1	r4	../d1_r4_irlds/LRB420_d1_r4/Snap-226-Image Export-51.tif	4	TRUE	809.116
LRB420	irld-11 in MY	d1	r4	../d1_r4_irlds/LRB420_d1_r4/Snap-240-Image Export-65.tif	0	TRUE	790.232
LRB420	irld-11 in MY	d1	r4	../d1_r4_irlds/LRB420_d1_r4/Snap-240-Image Export-65.tif	1	TRUE	749.821
LRB420	irld-11 in MY	d1	r4	../d1_r4_irlds/LRB420_d1_r4/Snap-182-Image Export-07.tif	1	TRUE	798.039
LRB420	irld-11 in MY	d1	r4	../d1_r4_irlds/LRB420_d1_r4/Snap-182-Image Export-07.tif	2	TRUE	755.628
LRB420	irld-11 in MY	d1	r4	../d1_r4_irlds/LRB420_d1_r4/Snap-177-Image Export-02.tif	0	TRUE	752.855
LRB420	irld-11 in MY	d1	r4	../d1_r4_irlds/LRB420_d1_r4/Snap-177-Image Export-02.tif	1	TRUE	794.339
LRB420	irld-11 in MY	d1	r4	../d1_r4_irlds/LRB420_d1_r4/Snap-180-Image Export-05.tif	0	TRUE	775.179
LRB420	irld-11 in MY	d1	r4	../d1_r4_irlds/LRB420_d1_r4/Snap-180-Image Export-05.tif	2	TRUE	764.377
LRB420	irld-11 in MY	d1	r4	../d1_r4_irlds/LRB420_d1_r4/Snap-180-Image Export-05.tif	3	TRUE	749.415
LRB420	irld-11 in MY	d1	r4	../d1_r4_irlds/LRB420_d1_r4/Snap-180-Image Export-05.tif	4	TRUE	827.112
LRB420	irld-11 in MY	d1	r4	../d1_r4_irlds/LRB420_d1_r4/Snap-242-Image Export-67.tif	0	TRUE	650.836
LRB420	irld-11 in MY	d1	r4	../d1_r4_irlds/LRB420_d1_r4/Snap-242-Image Export-67.tif	1	TRUE	781.836
LRB420	irld-11 in MY	d1	r4	../d1_r4_irlds/LRB420_d1_r4/Snap-242-Image Export-67.tif	2	TRUE	718.657
LRB420	irld-11 in MY	d1	r4	../d1_r4_irlds/LRB420_d1_r4/Snap-242-Image Export-67.tif	4	TRUE	806.619
LRB420	irld-11 in MY	d1	r4	../d1_r4_irlds/LRB420_d1_r4/Snap-222-Image Export-47.tif	0	TRUE	812.334
LRB420	irld-11 in MY	d1	r4	../d1_r4_irlds/LRB420_d1_r4/Snap-222-Image Export-47.tif	1	TRUE	739.28
LRB420	irld-11 in MY	d1	r4	../d1_r4_irlds/LRB420_d1_r4/Snap-220-Image Export-45.tif	0	TRUE	780.633
LRB420	irld-11 in MY	d1	r4	../d1_r4_irlds/LRB420_d1_r4/Snap-220-Image Export-45.tif	1	TRUE	779.063
LRB420	irld-11 in MY	d1	r4	../d1_r4_irlds/LRB420_d1_r4/Snap-246-Image Export-71.tif	0	TRUE	755.628
LRB420	irld-11 in MY	d1	r4	../d1_r4_irlds/LRB420_d1_r4/Snap-246-Image Export-71.tif	1	TRUE	743.884
LRB420	irld-11 in MY	d1	r4	../d1_r4_irlds/LRB420_d1_r4/Snap-246-Image Export-71.tif	2	TRUE	775.14
LRB420	irld-11 in MY	d1	r4	../d1_r4_irlds/LRB420_d1_r4/Snap-246-Image Export-71.tif	3	TRUE	796.836
LRB420	irld-11 in MY	d1	r4	../d1_r4_irlds/LRB420_d1_r4/Snap-221-Image Export-46.tif	1	TRUE	777.86
LRB420	irld-11 in MY	d1	r4	../d1_r4_irlds/LRB420_d1_r4/Snap-221-Image Export-46.tif	2	TRUE	736.468
LRB420	irld-11 in MY	d1	r4	../d1_r4_irlds/LRB420_d1_r4/Snap-247-Image Export-72.tif	0	TRUE	641.719
LRB420	irld-11 in MY	d1	r4	../d1_r4_irlds/LRB420_d1_r4/Snap-247-Image Export-72.tif	1	TRUE	790.362
LRB420	irld-11 in MY	d1	r4	../d1_r4_irlds/LRB420_d1_r4/Snap-247-Image Export-72.tif	2	TRUE	793.58
LRB420	irld-11 in MY	d1	r4	../d1_r4_irlds/LRB420_d1_r4/Snap-185-Image Export-10.tif	0	TRUE	793.932
LRB420	irld-11 in MY	d1	r4	../d1_r4_irlds/LRB420_d1_r4/Snap-185-Image Export-10.tif	1	TRUE	822.821
LRB420	irld-11 in MY	d1	r4	../d1_r4_irlds/LRB420_d1_r4/Snap-185-Image Export-10.tif	2	TRUE	769.87
LRB420	irld-11 in MY	d1	r4	../d1_r4_irlds/LRB420_d1_r4/Snap-203-Image Export-28.tif	0	TRUE	794.339
LRB420	irld-11 in MY	d1	r4	../d1_r4_irlds/LRB420_d1_r4/Snap-203-Image Export-28.tif	1	TRUE	756.923
LRB420	irld-11 in MY	d1	r4	../d1_r4_irlds/LRB420_d1_r4/Snap-187-Image Export-12.tif	0	TRUE	811.928
LRB420	irld-11 in MY	d1	r4	../d1_r4_irlds/LRB420_d1_r4/Snap-187-Image Export-12.tif	1	TRUE	743.256
LRB420	irld-11 in MY	d1	r4	../d1_r4_irlds/LRB420_d1_r4/Snap-187-Image Export-12.tif	2	TRUE	769.149
LRB420	irld-11 in MY	d1	r4	../d1_r4_irlds/LRB420_d1_r4/Snap-187-Image Export-12.tif	3	TRUE	791.971
LRB420	irld-11 in MY	d1	r4	../d1_r4_irlds/LRB420_d1_r4/Snap-187-Image Export-12.tif	4	TRUE	773.846
LRB420	irld-11 in MY	d1	r4	../d1_r4_irlds/LRB420_d1_r4/Snap-245-Image Export-70.tif	0	TRUE	880.005
LRB420	irld-11 in MY	d1	r4	../d1_r4_irlds/LRB420_d1_r4/Snap-245-Image Export-70.tif	1	TRUE	814.203
LRB420	irld-11 in MY	d1	r4	../d1_r4_irlds/LRB420_d1_r4/Snap-245-Image Export-70.tif	2	TRUE	809.024
LRB420	irld-11 in MY	d1	r4	../d1_r4_irlds/LRB420_d1_r4/Snap-184-Image Export-09.tif	1	TRUE	806.619
LRB420	irld-11 in MY	d1	r4	../d1_r4_irlds/LRB420_d1_r4/Snap-215-Image Export-40.tif	0	TRUE	752.005
LRB420	irld-11 in MY	d1	r4	../d1_r4_irlds/LRB420_d1_r4/Snap-215-Image Export-40.tif	1	TRUE	765.357
LRB420	irld-11 in MY	d1	r4	../d1_r4_irlds/LRB420_d1_r4/Snap-223-Image Export-48.tif	1	TRUE	772.681
LRB420	irld-11 in MY	d1	r4	../d1_r4_irlds/LRB420_d1_r4/Snap-244-Image Export-69.tif	0	TRUE	796.706
LRB420	irld-11 in MY	d1	r4	../d1_r4_irlds/LRB420_d1_r4/Snap-201-Image Export-26.tif	0	TRUE	764.913
LRB420	irld-11 in MY	d1	r4	../d1_r4_irlds/LRB420_d1_r4/Snap-201-Image Export-26.tif	1	TRUE	793.802
LRB420	irld-11 in MY	d1	r4	../d1_r4_irlds/LRB420_d1_r4/Snap-201-Image Export-26.tif	2	TRUE	384.491
LRB420	irld-11 in MY	d1	r4	../d1_r4_irlds/LRB420_d1_r4/Snap-200-Image Export-25.tif	0	TRUE	657.531
LRB420	irld-11 in MY	d1	r4	../d1_r4_irlds/LRB420_d1_r4/Snap-200-Image Export-25.tif	1	TRUE	812.242
LRB420	irld-11 in MY	d1	r4	../d1_r4_irlds/LRB420_d1_r4/Snap-216-Image Export-41.tif	0	TRUE	795.411
LRB420	irld-11 in MY	d1	r4	../d1_r4_irlds/LRB420_d1_r4/Snap-199-Image Export-24.tif	1	TRUE	786.034
LRB420	irld-11 in MY	d1	r4	../d1_r4_irlds/LRB420_d1_r4/Snap-199-Image Export-24.tif	2	TRUE	740.13
LRB420	irld-11 in MY	d1	r4	../d1_r4_irlds/LRB420_d1_r4/Snap-202-Image Export-27.tif	0	TRUE	766.874
LRB420	irld-11 in MY	d1	r4	../d1_r4_irlds/LRB420_d1_r4/Snap-202-Image Export-27.tif	1	TRUE	691.415
LRB420	irld-11 in MY	d1	r4	../d1_r4_irlds/LRB420_d1_r4/Snap-239-Image Export-64.tif	0	TRUE	768.797
LRB420	irld-11 in MY	d1	r4	../d1_r4_irlds/LRB420_d1_r4/Snap-239-Image Export-64.tif	1	TRUE	792.101
LRB420	irld-11 in MY	d1	r4	../d1_r4_irlds/LRB420_d1_r4/Snap-206-Image Export-31.tif	1	TRUE	716.198
LRB420	irld-11 in MY	d1	r4	../d1_r4_irlds/LRB420_d1_r4/Snap-206-Image Export-31.tif	3	TRUE	753.835
LRB420	irld-11 in MY	d1	r4	../d1_r4_irlds/LRB420_d1_r4/Snap-243-Image Export-68.tif	0	TRUE	815.368
LRB420	irld-11 in MY	d1	r4	../d1_r4_irlds/LRB420_d1_r4/Snap-243-Image Export-68.tif	1	TRUE	785.184
LRB420	irld-11 in MY	d1	r4	../d1_r4_irlds/LRB420_d1_r4/Snap-207-Image Export-32.tif	0	TRUE	774.918
LRB420	irld-11 in MY	d1	r4	../d1_r4_irlds/LRB420_d1_r4/Snap-207-Image Export-32.tif	1	TRUE	819.252
LRB420	irld-11 in MY	d1	r4	../d1_r4_irlds/LRB420_d1_r4/Snap-207-Image Export-32.tif	4	TRUE	822.025
LRB420	irld-11 in MY	d1	r4	../d1_r4_irlds/LRB420_d1_r4/Snap-207-Image Export-32.tif	6	TRUE	832.735
LRB420	irld-11 in MY	d1	r4	../d1_r4_irlds/LRB420_d1_r4/Snap-224-Image Export-49.tif	0	TRUE	781.078
LRB420	irld-11 in MY	d1	r4	../d1_r4_irlds/LRB420_d1_r4/Snap-224-Image Export-49.tif	1	TRUE	778.396
LRB420	irld-11 in MY	d1	r4	../d1_r4_irlds/LRB420_d1_r4/Snap-205-Image Export-30.tif	0	TRUE	779.247
LRB420	irld-11 in MY	d1	r4	../d1_r4_irlds/LRB420_d1_r4/Snap-205-Image Export-30.tif	1	TRUE	814.295
LRB420	irld-11 in MY	d1	r4	../d1_r4_irlds/LRB420_d1_r4/Snap-205-Image Export-30.tif	2	TRUE	749.285
LRB420	irld-11 in MY	d1	r4	../d1_r4_irlds/LRB420_d1_r4/Snap-198-Image Export-23.tif	0	TRUE	795.227
LRB420	irld-11 in MY	d1	r4	../d1_r4_irlds/LRB420_d1_r4/Snap-198-Image Export-23.tif	1	TRUE	791.787
LRB420	irld-11 in MY	d1	r4	../d1_r4_irlds/LRB420_d1_r4/Snap-196-Image Export-21.tif	0	TRUE	819.029
LRB420	irld-11 in MY	d1	r4	../d1_r4_irlds/LRB420_d1_r4/Snap-219-Image Export-44.tif	0	TRUE	777.454
LRB420	irld-11 in MY	d1	r4	../d1_r4_irlds/LRB420_d1_r4/Snap-219-Image Export-44.tif	1	TRUE	772.903
LRB420	irld-11 in MY	d1	r4	../d1_r4_irlds/LRB420_d1_r4/Snap-208-Image Export-33.tif	0	TRUE	720.618
LRB420	irld-11 in MY	d1	r4	../d1_r4_irlds/LRB420_d1_r4/Snap-208-Image Export-33.tif	1	TRUE	785.628
LRB420	irld-11 in MY	d1	r4	../d1_r4_irlds/LRB420_d1_r4/Snap-193-Image Export-18.tif	1	TRUE	813.314
LRB420	irld-11 in MY	d1	r4	../d1_r4_irlds/LRB420_d1_r4/Snap-193-Image Export-18.tif	2	TRUE	810.189
LRB420	irld-11 in MY	d1	r4	../d1_r4_irlds/LRB420_d1_r4/Snap-193-Image Export-18.tif	3	TRUE	834.213
LRB420	irld-11 in MY	d1	r4	../d1_r4_irlds/LRB420_d1_r4/Snap-197-Image Export-22.tif	0	TRUE	821.175
LRB420	irld-11 in MY	d1	r4	../d1_r4_irlds/LRB420_d1_r4/Snap-197-Image Export-22.tif	1	TRUE	786.034
LRB420	irld-11 in MY	d1	r4	../d1_r4_irlds/LRB420_d1_r4/Snap-234-Image Export-59.tif	0	TRUE	793.317
LRB420	irld-11 in MY	d1	r4	../d1_r4_irlds/LRB420_d1_r4/Snap-234-Image Export-59.tif	1	TRUE	808.764
LRB420	irld-11 in MY	d1	r4	../d1_r4_irlds/LRB420_d1_r4/Snap-234-Image Export-59.tif	2	TRUE	796.392
LRB420	irld-11 in MY	d1	r4	../d1_r4_irlds/LRB420_d1_r4/Snap-233-Image Export-58.tif	0	TRUE	770.406
LRB420	irld-11 in MY	d1	r4	../d1_r4_irlds/LRB420_d1_r4/Snap-233-Image Export-58.tif	1	TRUE	834.88
LRB420	irld-11 in MY	d1	r4	../d1_r4_irlds/LRB420_d1_r4/Snap-235-Image Export-60.tif	0	TRUE	803.087
LRB420	irld-11 in MY	d1	r4	../d1_r4_irlds/LRB420_d1_r4/Snap-235-Image Export-60.tif	1	TRUE	770
LRB420	irld-11 in MY	d1	r4	../d1_r4_irlds/LRB420_d1_r4/Snap-235-Image Export-60.tif	2	TRUE	801.126
LRB420	irld-11 in MY	d1	r4	../d1_r4_irlds/LRB420_d1_r4/Snap-235-Image Export-60.tif	4	TRUE	788.846
LRB420	irld-11 in MY	d1	r4	../d1_r4_irlds/LRB420_d1_r4/Snap-235-Image Export-60.tif	5	TRUE	763.619
LRB420	irld-11 in MY	d1	r4	../d1_r4_irlds/LRB420_d1_r4/Snap-235-Image Export-60.tif	6	TRUE	788.401
LRB420	irld-11 in MY	d1	r4	../d1_r4_irlds/LRB420_d1_r4/Snap-211-Image Export-36.tif	0	TRUE	818.493
LRB420	irld-11 in MY	d1	r4	../d1_r4_irlds/LRB420_d1_r4/Snap-194-Image Export-19.tif	0	TRUE	765.043
LRB420	irld-11 in MY	d1	r4	../d1_r4_irlds/LRB420_d1_r4/Snap-194-Image Export-19.tif	1	TRUE	790.27
LRB420	irld-11 in MY	d1	r4	../d1_r4_irlds/LRB420_d1_r4/Snap-237-Image Export-62.tif	0	TRUE	813.092
LRB420	irld-11 in MY	d1	r4	../d1_r4_irlds/LRB420_d1_r4/Snap-237-Image Export-62.tif	1	TRUE	802.329
LRB420	irld-11 in MY	d1	r4	../d1_r4_irlds/LRB420_d1_r4/Snap-237-Image Export-62.tif	2	TRUE	850.822
LRB420	irld-11 in MY	d1	r4	../d1_r4_irlds/LRB420_d1_r4/Snap-237-Image Export-62.tif	3	TRUE	789.068
LRB420	irld-11 in MY	d1	r4	../d1_r4_irlds/LRB420_d1_r4/Snap-212-Image Export-37.tif	1	TRUE	798.131
LRB420	irld-11 in MY	d1	r4	../d1_r4_irlds/LRB420_d1_r4/Snap-212-Image Export-37.tif	2	TRUE	801.976
LRB420	irld-11 in MY	d1	r4	../d1_r4_irlds/LRB420_d1_r4/Snap-209-Image Export-34.tif	0	TRUE	807.952
LRB420	irld-11 in MY	d1	r4	../d1_r4_irlds/LRB420_d1_r4/Snap-236-Image Export-61.tif	1	TRUE	764.821
LRB420	irld-11 in MY	d1	r4	../d1_r4_irlds/LRB420_d1_r4/Snap-236-Image Export-61.tif	2	TRUE	788.662
LRB420	irld-11 in MY	d1	r4	../d1_r4_irlds/LRB420_d1_r4/Snap-236-Image Export-61.tif	3	TRUE	818.937
LRB420	irld-11 in MY	d1	r4	../d1_r4_irlds/LRB420_d1_r4/Snap-210-Image Export-35.tif	0	TRUE	739.686
LRB420	irld-11 in MY	d1	r4	../d1_r4_irlds/LRB420_d1_r4/Snap-210-Image Export-35.tif	1	TRUE	777.454
LRB420	irld-11 in MY	d8	r4	../d8_r4_irlds/LRB420_d8_r4/Snap-131-Image Export-12.tif	0	TRUE	429.073
LRB420	irld-11 in MY	d8	r4	../d8_r4_irlds/LRB420_d8_r4/Snap-131-Image Export-12.tif	1	TRUE	459.154
LRB420	irld-11 in MY	d8	r4	../d8_r4_irlds/LRB420_d8_r4/Snap-136-Image Export-17.tif	0	TRUE	585.808
LRB420	irld-11 in MY	d8	r4	../d8_r4_irlds/LRB420_d8_r4/Snap-134-Image Export-15.tif	1	TRUE	369.111
LRB420	irld-11 in MY	d8	r4	../d8_r4_irlds/LRB420_d8_r4/Snap-134-Image Export-15.tif	2	TRUE	555.197
LRB420	irld-11 in MY	d8	r4	../d8_r4_irlds/LRB420_d8_r4/Snap-153-Image Export-34.tif	0	TRUE	449.891
LRB420	irld-11 in MY	d8	r4	../d8_r4_irlds/LRB420_d8_r4/Snap-159-Image Export-40.tif	0	TRUE	501.804
LRB420	irld-11 in MY	d8	r4	../d8_r4_irlds/LRB420_d8_r4/Snap-129-Image Export-10.tif	0	TRUE	451.37
LRB420	irld-11 in MY	d8	r4	../d8_r4_irlds/LRB420_d8_r4/Snap-132-Image Export-13.tif	0	TRUE	465.329
LRB420	irld-11 in MY	d8	r4	../d8_r4_irlds/LRB420_d8_r4/Snap-132-Image Export-13.tif	1	TRUE	422.432
LRB420	irld-11 in MY	d8	r4	../d8_r4_irlds/LRB420_d8_r4/Snap-135-Image Export-16.tif	0	TRUE	441.313
LRB420	irld-11 in MY	d8	r4	../d8_r4_irlds/LRB420_d8_r4/Snap-130-Image Export-11.tif	0	TRUE	552.219
LRB420	irld-11 in MY	d8	r4	../d8_r4_irlds/LRB420_d8_r4/Snap-130-Image Export-11.tif	2	TRUE	462.616
LRB420	irld-11 in MY	d8	r4	../d8_r4_irlds/LRB420_d8_r4/Snap-168-Image Export-49.tif	0	TRUE	385.243
LRB420	irld-11 in MY	d8	r4	../d8_r4_irlds/LRB420_d8_r4/Snap-168-Image Export-49.tif	1	TRUE	469.65
LRB420	irld-11 in MY	d8	r4	../d8_r4_irlds/LRB420_d8_r4/Snap-168-Image Export-49.tif	2	TRUE	481.535
LRB420	irld-11 in MY	d8	r4	../d8_r4_irlds/LRB420_d8_r4/Snap-150-Image Export-31.tif	1	TRUE	444.291
LRB420	irld-11 in MY	d8	r4	../d8_r4_irlds/LRB420_d8_r4/Snap-150-Image Export-31.tif	2	TRUE	491.528
LRB420	irld-11 in MY	d8	r4	../d8_r4_irlds/LRB420_d8_r4/Snap-150-Image Export-31.tif	3	TRUE	393.236
LRB420	irld-11 in MY	d8	r4	../d8_r4_irlds/LRB420_d8_r4/Snap-155-Image Export-36.tif	0	TRUE	422.303
LRB420	irld-11 in MY	d8	r4	../d8_r4_irlds/LRB420_d8_r4/Snap-149-Image Export-30.tif	0	TRUE	449.626
LRB420	irld-11 in MY	d8	r4	../d8_r4_irlds/LRB420_d8_r4/Snap-149-Image Export-30.tif	1	TRUE	507.65
LRB420	irld-11 in MY	d8	r4	../d8_r4_irlds/LRB420_d8_r4/Snap-149-Image Export-30.tif	2	TRUE	348.887
LRB420	irld-11 in MY	d8	r4	../d8_r4_irlds/LRB420_d8_r4/Snap-154-Image Export-35.tif	0	TRUE	474.747
LRB420	irld-11 in MY	d8	r4	../d8_r4_irlds/LRB420_d8_r4/Snap-133-Image Export-14.tif	2	TRUE	473.112
LRB420	irld-11 in MY	d8	r4	../d8_r4_irlds/LRB420_d8_r4/Snap-151-Image Export-32.tif	0	TRUE	468.481
LRB420	irld-11 in MY	d8	r4	../d8_r4_irlds/LRB420_d8_r4/Snap-151-Image Export-32.tif	1	TRUE	453.837
LRB420	irld-11 in MY	d8	r4	../d8_r4_irlds/LRB420_d8_r4/Snap-145-Image Export-26.tif	0	TRUE	418.486
LRB420	irld-11 in MY	d8	r4	../d8_r4_irlds/LRB420_d8_r4/Snap-145-Image Export-26.tif	1	TRUE	556.696
LRB420	irld-11 in MY	d8	r4	../d8_r4_irlds/LRB420_d8_r4/Snap-145-Image Export-26.tif	2	TRUE	482.484
LRB420	irld-11 in MY	d8	r4	../d8_r4_irlds/LRB420_d8_r4/Snap-145-Image Export-26.tif	3	TRUE	563.465
LRB420	irld-11 in MY	d8	r4	../d8_r4_irlds/LRB420_d8_r4/Snap-140-Image Export-21.tif	1	TRUE	479.086
LRB420	irld-11 in MY	d8	r4	../d8_r4_irlds/LRB420_d8_r4/Snap-140-Image Export-21.tif	4	TRUE	524.412
LRB420	irld-11 in MY	d8	r4	../d8_r4_irlds/LRB420_d8_r4/Snap-141-Image Export-22.tif	0	TRUE	564.77
LRB420	irld-11 in MY	d8	r4	../d8_r4_irlds/LRB420_d8_r4/Snap-141-Image Export-22.tif	1	TRUE	520.814
LRB420	irld-11 in MY	d8	r4	../d8_r4_irlds/LRB420_d8_r4/Snap-141-Image Export-22.tif	3	TRUE	464.25
LRB420	irld-11 in MY	d8	r4	../d8_r4_irlds/LRB420_d8_r4/Snap-146-Image Export-27.tif	0	TRUE	463.52
LRB420	irld-11 in MY	d8	r4	../d8_r4_irlds/LRB420_d8_r4/Snap-146-Image Export-27.tif	2	TRUE	486.896
LRB420	irld-11 in MY	d8	r4	../d8_r4_irlds/LRB420_d8_r4/Snap-144-Image Export-25.tif	0	TRUE	439.285
LRB420	irld-11 in MY	d8	r4	../d8_r4_irlds/LRB420_d8_r4/Snap-144-Image Export-25.tif	1	TRUE	424.926
LRB420	irld-11 in MY	d8	r4	../d8_r4_irlds/LRB420_d8_r4/Snap-144-Image Export-25.tif	2	TRUE	463.63
LRB420	irld-11 in MY	d8	r4	../d8_r4_irlds/LRB420_d8_r4/Snap-144-Image Export-25.tif	4	TRUE	442.373
LRB420	irld-11 in MY	d8	r4	../d8_r4_irlds/LRB420_d8_r4/Snap-144-Image Export-25.tif	5	TRUE	245.17
LRB420	irld-11 in MY	d8	r4	../d8_r4_irlds/LRB420_d8_r4/Snap-123-Image Export-04.tif	0	TRUE	472.317
LRB420	irld-11 in MY	d8	r4	../d8_r4_irlds/LRB420_d8_r4/Snap-123-Image Export-04.tif	1	TRUE	443.232
LRB420	irld-11 in MY	d8	r4	../d8_r4_irlds/LRB420_d8_r4/Snap-124-Image Export-05.tif	2	TRUE	345.954
LRB420	irld-11 in MY	d8	r4	../d8_r4_irlds/LRB420_d8_r4/Snap-143-Image Export-24.tif	0	TRUE	566.927
LRB420	irld-11 in MY	d8	r4	../d8_r4_irlds/LRB420_d8_r4/Snap-143-Image Export-24.tif	2	TRUE	544.391
LRB420	irld-11 in MY	d8	r4	../d8_r4_irlds/LRB420_d8_r4/Snap-143-Image Export-24.tif	5	TRUE	454.257
LRB420	irld-11 in MY	d8	r4	../d8_r4_irlds/LRB420_d8_r4/Snap-121-Image Export-02.tif	0	TRUE	341.497
LRB420	irld-11 in MY	d8	r4	../d8_r4_irlds/LRB420_d8_r4/Snap-121-Image Export-02.tif	1	TRUE	404.728
LRB420	irld-11 in MY	d8	r4	../d8_r4_irlds/LRB420_d8_r4/Snap-126-Image Export-07.tif	0	TRUE	477.149
LRB420	irld-11 in MY	d8	r4	../d8_r4_irlds/LRB420_d8_r4/Snap-120-Image Export-01.tif	0	TRUE	490.733
LRB420	irld-11 in MY	d8	r4	../d8_r4_irlds/LRB420_d8_r4/Snap-122-Image Export-03.tif	0	TRUE	472.28
LRB420	irld-11 in MY	d8	r4	../d8_r4_irlds/LRB420_d8_r4/Snap-138-Image Export-19.tif	2	TRUE	415.708
LRB420	irld-11 in MY	d8	r4	../d8_r4_irlds/LRB420_d8_r4/Snap-164-Image Export-45.tif	0	TRUE	486.431
LRB420	irld-11 in MY	d8	r4	../d8_r4_irlds/LRB420_d8_r4/Snap-164-Image Export-45.tif	2	TRUE	423.181
LRB420	irld-11 in MY	d8	r4	../d8_r4_irlds/LRB420_d8_r4/Snap-161-Image Export-42.tif	0	TRUE	540.728
LRB420	irld-11 in MY	d8	r4	../d8_r4_irlds/LRB420_d8_r4/Snap-166-Image Export-47.tif	0	TRUE	429.027
LRB420	irld-11 in MY	d8	r4	../d8_r4_irlds/LRB420_d8_r4/Snap-139-Image Export-20.tif	1	TRUE	447.734
LRB420	irld-11 in MY	d8	r4	../d8_r4_irlds/LRB420_d8_r4/Snap-160-Image Export-41.tif	0	TRUE	477.524
LRB420	irld-11 in MY	d8	r4	../d8_r4_irlds/LRB420_d8_r4/Snap-160-Image Export-41.tif	1	TRUE	471.678
LRB420	irld-11 in MY	d8	r4	../d8_r4_irlds/LRB420_d8_r4/Snap-158-Image Export-39.tif	2	TRUE	450.795
LRB420	irld-11 in MY	d8	r4	../d8_r4_irlds/LRB420_d8_r4/Snap-158-Image Export-39.tif	3	TRUE	469.805
LRB420	irld-11 in MY	d8	r4	../d8_r4_irlds/LRB420_d8_r4/Snap-147-Image Export-28.tif	0	TRUE	493.245
LRB420	irld-11 in MY	d8	r4	../d8_r4_irlds/LRB420_d8_r4/Snap-147-Image Export-28.tif	1	TRUE	341.698
LRB420	irld-11 in MY	d8	r4	../d8_r4_irlds/LRB420_d8_r4/Snap-147-Image Export-28.tif	2	TRUE	467.028
LRB420	irld-11 in MY	d8	r4	../d8_r4_irlds/LRB420_d8_r4/Snap-147-Image Export-28.tif	3	TRUE	533.584
LRB420	irld-11 in MY	d8	r4	../d8_r4_irlds/LRB420_d8_r4/Snap-147-Image Export-28.tif	4	TRUE	410.108
LRB420	irld-11 in MY	d8	r4	../d8_r4_irlds/LRB420_d8_r4/Snap-162-Image Export-43.tif	1	TRUE	308.018
LRB420	irld-11 in MY	d8	r4	../d8_r4_irlds/LRB420_d8_r4/Snap-162-Image Export-43.tif	2	TRUE	328.489
LRB420	irld-11 in MY	d8	r4	../d8_r4_irlds/LRB420_d8_r4/Snap-165-Image Export-46.tif	0	TRUE	487.142
LRB420	irld-11 in MY	d8	r4	../d8_r4_irlds/LRB420_d8_r4/Snap-165-Image Export-46.tif	2	TRUE	285.108
LRB420	irld-11 in MY	d8	r4	../d8_r4_irlds/LRB420_d8_r4/Snap-128-Image Export-09.tif	0	TRUE	292.936
LRB420	irld-11 in MY	d8	r4	../d8_r4_irlds/LRB420_d8_r4/Snap-137-Image Export-18.tif	0	TRUE	459.044
LRB420	irld-11 in MY	d8	r4	../d8_r4_irlds/LRB420_d8_r4/Snap-137-Image Export-18.tif	1	TRUE	538.261
LRB420	irld-11 in MY	d1	r5	../d1_r5_irlds/LRB420_d1_r5/Snap-167-Image Export-02.tif	0	TRUE	794.561
LRB420	irld-11 in MY	d1	r5	../d1_r5_irlds/LRB420_d1_r5/Snap-167-Image Export-02.tif	2	TRUE	732.27
LRB420	irld-11 in MY	d1	r5	../d1_r5_irlds/LRB420_d1_r5/Snap-233-Image Export-68.tif	0	TRUE	730.531
LRB420	irld-11 in MY	d1	r5	../d1_r5_irlds/LRB420_d1_r5/Snap-233-Image Export-68.tif	1	TRUE	764.913
LRB420	irld-11 in MY	d1	r5	../d1_r5_irlds/LRB420_d1_r5/Snap-166-Image Export-01.tif	0	TRUE	755.536
LRB420	irld-11 in MY	d1	r5	../d1_r5_irlds/LRB420_d1_r5/Snap-166-Image Export-01.tif	1	TRUE	768.169
LRB420	irld-11 in MY	d1	r5	../d1_r5_irlds/LRB420_d1_r5/Snap-179-Image Export-14.tif	1	TRUE	796.744
LRB420	irld-11 in MY	d1	r5	../d1_r5_irlds/LRB420_d1_r5/Snap-193-Image Export-28.tif	0	TRUE	805.454
LRB420	irld-11 in MY	d1	r5	../d1_r5_irlds/LRB420_d1_r5/Snap-203-Image Export-38.tif	1	TRUE	746.604
LRB420	irld-11 in MY	d1	r5	../d1_r5_irlds/LRB420_d1_r5/Snap-203-Image Export-38.tif	4	TRUE	774.642
LRB420	irld-11 in MY	d1	r5	../d1_r5_irlds/LRB420_d1_r5/Snap-203-Image Export-38.tif	10	TRUE	752.817
LRB420	irld-11 in MY	d1	r5	../d1_r5_irlds/LRB420_d1_r5/Snap-203-Image Export-38.tif	11	TRUE	741.073
LRB420	irld-11 in MY	d1	r5	../d1_r5_irlds/LRB420_d1_r5/Snap-169-Image Export-04.tif	0	TRUE	677.173
LRB420	irld-11 in MY	d1	r5	../d1_r5_irlds/LRB420_d1_r5/Snap-172-Image Export-07.tif	0	TRUE	761.657
LRB420	irld-11 in MY	d1	r5	../d1_r5_irlds/LRB420_d1_r5/Snap-172-Image Export-07.tif	1	TRUE	797.242
LRB420	irld-11 in MY	d1	r5	../d1_r5_irlds/LRB420_d1_r5/Snap-214-Image Export-49.tif	1	TRUE	748.212
LRB420	irld-11 in MY	d1	r5	../d1_r5_irlds/LRB420_d1_r5/Snap-214-Image Export-49.tif	2	TRUE	794.783
LRB420	irld-11 in MY	d1	r5	../d1_r5_irlds/LRB420_d1_r5/Snap-221-Image Export-56.tif	0	TRUE	811.169
LRB420	irld-11 in MY	d1	r5	../d1_r5_irlds/LRB420_d1_r5/Snap-221-Image Export-56.tif	2	TRUE	780.541
LRB420	irld-11 in MY	d1	r5	../d1_r5_irlds/LRB420_d1_r5/Snap-221-Image Export-56.tif	3	TRUE	763.619
LRB420	irld-11 in MY	d1	r5	../d1_r5_irlds/LRB420_d1_r5/Snap-222-Image Export-57.tif	2	TRUE	692.579
LRB420	irld-11 in MY	d1	r5	../d1_r5_irlds/LRB420_d1_r5/Snap-222-Image Export-57.tif	3	TRUE	764.063
LRB420	irld-11 in MY	d1	r5	../d1_r5_irlds/LRB420_d1_r5/Snap-222-Image Export-57.tif	5	TRUE	710.483
LRB420	irld-11 in MY	d1	r5	../d1_r5_irlds/LRB420_d1_r5/Snap-222-Image Export-57.tif	6	TRUE	547.506
LRB420	irld-11 in MY	d1	r5	../d1_r5_irlds/LRB420_d1_r5/Snap-222-Image Export-57.tif	7	TRUE	786.478
LRB420	irld-11 in MY	d1	r5	../d1_r5_irlds/LRB420_d1_r5/Snap-222-Image Export-57.tif	8	TRUE	762.676
LRB420	irld-11 in MY	d1	r5	../d1_r5_irlds/LRB420_d1_r5/Snap-222-Image Export-57.tif	9	TRUE	819.474
LRB420	irld-11 in MY	d1	r5	../d1_r5_irlds/LRB420_d1_r5/Snap-180-Image Export-15.tif	0	TRUE	754.15
LRB420	irld-11 in MY	d1	r5	../d1_r5_irlds/LRB420_d1_r5/Snap-175-Image Export-10.tif	0	TRUE	828.314
LRB420	irld-11 in MY	d1	r5	../d1_r5_irlds/LRB420_d1_r5/Snap-175-Image Export-10.tif	1	TRUE	747.676
LRB420	irld-11 in MY	d1	r5	../d1_r5_irlds/LRB420_d1_r5/Snap-168-Image Export-03.tif	0	TRUE	719.415
LRB420	irld-11 in MY	d1	r5	../d1_r5_irlds/LRB420_d1_r5/Snap-168-Image Export-03.tif	1	TRUE	813.314
LRB420	irld-11 in MY	d1	r5	../d1_r5_irlds/LRB420_d1_r5/Snap-213-Image Export-48.tif	0	TRUE	751.43
LRB420	irld-11 in MY	d1	r5	../d1_r5_irlds/LRB420_d1_r5/Snap-213-Image Export-48.tif	1	TRUE	750.58
LRB420	irld-11 in MY	d1	r5	../d1_r5_irlds/LRB420_d1_r5/Snap-204-Image Export-39.tif	0	TRUE	846.624
LRB420	irld-11 in MY	d1	r5	../d1_r5_irlds/LRB420_d1_r5/Snap-204-Image Export-39.tif	1	TRUE	737.189
LRB420	irld-11 in MY	d1	r5	../d1_r5_irlds/LRB420_d1_r5/Snap-204-Image Export-39.tif	2	TRUE	790.455
LRB420	irld-11 in MY	d1	r5	../d1_r5_irlds/LRB420_d1_r5/Snap-176-Image Export-11.tif	0	TRUE	738.207
LRB420	irld-11 in MY	d1	r5	../d1_r5_irlds/LRB420_d1_r5/Snap-176-Image Export-11.tif	1	TRUE	688.251
LRB420	irld-11 in MY	d1	r5	../d1_r5_irlds/LRB420_d1_r5/Snap-181-Image Export-16.tif	0	TRUE	758.884
LRB420	irld-11 in MY	d1	r5	../d1_r5_irlds/LRB420_d1_r5/Snap-198-Image Export-33.tif	0	TRUE	818.179
LRB420	irld-11 in MY	d1	r5	../d1_r5_irlds/LRB420_d1_r5/Snap-198-Image Export-33.tif	1	TRUE	769.908
LRB420	irld-11 in MY	d1	r5	../d1_r5_irlds/LRB420_d1_r5/Snap-198-Image Export-33.tif	2	TRUE	784.778
LRB420	irld-11 in MY	d1	r5	../d1_r5_irlds/LRB420_d1_r5/Snap-198-Image Export-33.tif	3	TRUE	830.015
LRB420	irld-11 in MY	d1	r5	../d1_r5_irlds/LRB420_d1_r5/Snap-198-Image Export-33.tif	4	TRUE	792.952
LRB420	irld-11 in MY	d1	r5	../d1_r5_irlds/LRB420_d1_r5/Snap-183-Image Export-18.tif	0	TRUE	403.375
LRB420	irld-11 in MY	d1	r5	../d1_r5_irlds/LRB420_d1_r5/Snap-183-Image Export-18.tif	1	TRUE	813.667
LRB420	irld-11 in MY	d1	r5	../d1_r5_irlds/LRB420_d1_r5/Snap-183-Image Export-18.tif	2	TRUE	749.821
LRB420	irld-11 in MY	d1	r5	../d1_r5_irlds/LRB420_d1_r5/Snap-185-Image Export-20.tif	1	TRUE	768.169
LRB420	irld-11 in MY	d1	r5	../d1_r5_irlds/LRB420_d1_r5/Snap-185-Image Export-20.tif	2	TRUE	826.798
LRB420	irld-11 in MY	d1	r5	../d1_r5_irlds/LRB420_d1_r5/Snap-224-Image Export-59.tif	1	TRUE	732.178
LRB420	irld-11 in MY	d1	r5	../d1_r5_irlds/LRB420_d1_r5/Snap-224-Image Export-59.tif	2	TRUE	784.74
LRB420	irld-11 in MY	d1	r5	../d1_r5_irlds/LRB420_d1_r5/Snap-224-Image Export-59.tif	3	TRUE	743.792
LRB420	irld-11 in MY	d1	r5	../d1_r5_irlds/LRB420_d1_r5/Snap-211-Image Export-46.tif	0	TRUE	726.647
LRB420	irld-11 in MY	d1	r5	../d1_r5_irlds/LRB420_d1_r5/Snap-211-Image Export-46.tif	2	TRUE	743.034
LRB420	irld-11 in MY	d1	r5	../d1_r5_irlds/LRB420_d1_r5/Snap-211-Image Export-46.tif	3	TRUE	770.942
LRB420	irld-11 in MY	d1	r5	../d1_r5_irlds/LRB420_d1_r5/Snap-187-Image Export-22.tif	0	TRUE	753.039
LRB420	irld-11 in MY	d1	r5	../d1_r5_irlds/LRB420_d1_r5/Snap-187-Image Export-22.tif	1	TRUE	731.918
LRB420	irld-11 in MY	d1	r5	../d1_r5_irlds/LRB420_d1_r5/Snap-187-Image Export-22.tif	2	TRUE	767.909
LRB420	irld-11 in MY	d1	r5	../d1_r5_irlds/LRB420_d1_r5/Snap-187-Image Export-22.tif	3	TRUE	782.594
LRB420	irld-11 in MY	d1	r5	../d1_r5_irlds/LRB420_d1_r5/Snap-210-Image Export-45.tif	0	TRUE	784.648
LRB420	irld-11 in MY	d1	r5	../d1_r5_irlds/LRB420_d1_r5/Snap-210-Image Export-45.tif	2	TRUE	811.131
LRB420	irld-11 in MY	d1	r5	../d1_r5_irlds/LRB420_d1_r5/Snap-210-Image Export-45.tif	3	TRUE	789.566
LRB420	irld-11 in MY	d1	r5	../d1_r5_irlds/LRB420_d1_r5/Snap-210-Image Export-45.tif	4	TRUE	814.517
LRB420	irld-11 in MY	d1	r5	../d1_r5_irlds/LRB420_d1_r5/Snap-210-Image Export-45.tif	5	TRUE	795.763
LRB420	irld-11 in MY	d1	r5	../d1_r5_irlds/LRB420_d1_r5/Snap-186-Image Export-21.tif	0	TRUE	754.908
LRB420	irld-11 in MY	d1	r5	../d1_r5_irlds/LRB420_d1_r5/Snap-186-Image Export-21.tif	1	TRUE	815.368
LRB420	irld-11 in MY	d1	r5	../d1_r5_irlds/LRB420_d1_r5/Snap-209-Image Export-44.tif	1	TRUE	757.367
LRB420	irld-11 in MY	d1	r5	../d1_r5_irlds/LRB420_d1_r5/Snap-209-Image Export-44.tif	2	TRUE	806.175
LRB420	irld-11 in MY	d1	r5	../d1_r5_irlds/LRB420_d1_r5/Snap-212-Image Export-47.tif	0	TRUE	760.937
LRB420	irld-11 in MY	d1	r5	../d1_r5_irlds/LRB420_d1_r5/Snap-212-Image Export-47.tif	1	TRUE	780.005
LRB420	irld-11 in MY	d1	r5	../d1_r5_irlds/LRB420_d1_r5/Snap-174-Image Export-09.tif	0	TRUE	724.502
LRB420	irld-11 in MY	d1	r5	../d1_r5_irlds/LRB420_d1_r5/Snap-226-Image Export-61.tif	0	TRUE	792.952
LRB420	irld-11 in MY	d1	r5	../d1_r5_irlds/LRB420_d1_r5/Snap-173-Image Export-08.tif	0	TRUE	759.014
LRB420	irld-11 in MY	d1	r5	../d1_r5_irlds/LRB420_d1_r5/Snap-173-Image Export-08.tif	1	TRUE	790.362
LRB420	irld-11 in MY	d1	r5	../d1_r5_irlds/LRB420_d1_r5/Snap-173-Image Export-08.tif	2	TRUE	772.903
LRB420	irld-11 in MY	d1	r5	../d1_r5_irlds/LRB420_d1_r5/Snap-202-Image Export-37.tif	0	TRUE	776.565
LRB420	irld-11 in MY	d1	r5	../d1_r5_irlds/LRB420_d1_r5/Snap-202-Image Export-37.tif	1	TRUE	781.522
LRB420	irld-11 in MY	d1	r5	../d1_r5_irlds/LRB420_d1_r5/Snap-202-Image Export-37.tif	2	TRUE	824.116
LRB420	irld-11 in MY	d1	r5	../d1_r5_irlds/LRB420_d1_r5/Snap-199-Image Export-34.tif	0	TRUE	709.816
LRB420	irld-11 in MY	d1	r5	../d1_r5_irlds/LRB420_d1_r5/Snap-199-Image Export-34.tif	1	TRUE	785.276
LRB420	irld-11 in MY	d1	r5	../d1_r5_irlds/LRB420_d1_r5/Snap-216-Image Export-51.tif	0	TRUE	793.266
LRB420	irld-11 in MY	d1	r5	../d1_r5_irlds/LRB420_d1_r5/Snap-216-Image Export-51.tif	1	TRUE	778.933
LRB420	irld-11 in MY	d1	r5	../d1_r5_irlds/LRB420_d1_r5/Snap-200-Image Export-35.tif	0	TRUE	793.488
LRB420	irld-11 in MY	d1	r5	../d1_r5_irlds/LRB420_d1_r5/Snap-200-Image Export-35.tif	1	TRUE	787.459
LRB420	irld-11 in MY	d1	r5	../d1_r5_irlds/LRB420_d1_r5/Snap-201-Image Export-36.tif	4	TRUE	755.981
LRB420	irld-11 in MY	d1	r5	../d1_r5_irlds/LRB420_d1_r5/Snap-201-Image Export-36.tif	5	TRUE	696.778
LRB420	irld-11 in MY	d1	r5	../d1_r5_irlds/LRB420_d1_r5/Snap-201-Image Export-36.tif	6	TRUE	736.154
LRB420	irld-11 in MY	d1	r5	../d1_r5_irlds/LRB420_d1_r5/Snap-225-Image Export-60.tif	0	TRUE	751.246
LRB420	irld-11 in MY	d1	r5	../d1_r5_irlds/LRB420_d1_r5/Snap-225-Image Export-60.tif	1	TRUE	732.454
LRB420	irld-11 in MY	d1	r5	../d1_r5_irlds/LRB420_d1_r5/Snap-225-Image Export-60.tif	2	TRUE	776.251
LRB420	irld-11 in MY	d1	r5	../d1_r5_irlds/LRB420_d1_r5/Snap-217-Image Export-52.tif	0	TRUE	779.025
LRB420	irld-11 in MY	d1	r5	../d1_r5_irlds/LRB420_d1_r5/Snap-217-Image Export-52.tif	1	TRUE	789.474
LRB420	irld-11 in MY	d1	r5	../d1_r5_irlds/LRB420_d1_r5/Snap-217-Image Export-52.tif	3	TRUE	733.343
LRB420	irld-11 in MY	d1	r5	../d1_r5_irlds/LRB420_d1_r5/Snap-223-Image Export-58.tif	0	TRUE	752.947
LRB420	irld-11 in MY	d1	r5	../d1_r5_irlds/LRB420_d1_r5/Snap-223-Image Export-58.tif	1	TRUE	765.449
LRB420	irld-11 in MY	d1	r5	../d1_r5_irlds/LRB420_d1_r5/Snap-223-Image Export-58.tif	2	TRUE	811.614
LRB420	irld-11 in MY	d1	r5	../d1_r5_irlds/LRB420_d1_r5/Snap-227-Image Export-62.tif	1	TRUE	758.44
LRB420	irld-11 in MY	d1	r5	../d1_r5_irlds/LRB420_d1_r5/Snap-227-Image Export-62.tif	2	TRUE	789.382
LRB420	irld-11 in MY	d1	r5	../d1_r5_irlds/LRB420_d1_r5/Snap-227-Image Export-62.tif	3	TRUE	700.255
LRB420	irld-11 in MY	d1	r5	../d1_r5_irlds/LRB420_d1_r5/Snap-227-Image Export-62.tif	4	TRUE	747.454
LRB420	irld-11 in MY	d1	r5	../d1_r5_irlds/LRB420_d1_r5/Snap-215-Image Export-50.tif	1	TRUE	684.275
LRB420	irld-11 in MY	d1	r5	../d1_r5_irlds/LRB420_d1_r5/Snap-215-Image Export-50.tif	2	TRUE	741.333
LRB420	irld-11 in MY	d1	r5	../d1_r5_irlds/LRB420_d1_r5/Snap-184-Image Export-19.tif	1	TRUE	658.512
LRB420	irld-11 in MY	d1	r5	../d1_r5_irlds/LRB420_d1_r5/Snap-184-Image Export-19.tif	2	TRUE	762.102
LRB420	irld-11 in MY	d1	r5	../d1_r5_irlds/LRB420_d1_r5/Snap-184-Image Export-19.tif	3	TRUE	793.174
LRB420	irld-11 in MY	d1	r5	../d1_r5_irlds/LRB420_d1_r5/Snap-184-Image Export-19.tif	4	TRUE	744.42
LRB420	irld-11 in MY	d1	r5	../d1_r5_irlds/LRB420_d1_r5/Snap-208-Image Export-43.tif	0	TRUE	768.889
LRB420	irld-11 in MY	d1	r5	../d1_r5_irlds/LRB420_d1_r5/Snap-208-Image Export-43.tif	4	TRUE	765.227
LRB420	irld-11 in MY	d1	r5	../d1_r5_irlds/LRB420_d1_r5/Snap-208-Image Export-43.tif	9	TRUE	784.778
LRB420	irld-11 in MY	d1	r5	../d1_r5_irlds/LRB420_d1_r5/Snap-206-Image Export-41.tif	1	TRUE	802.643
LRB420	irld-11 in MY	d1	r5	../d1_r5_irlds/LRB420_d1_r5/Snap-206-Image Export-41.tif	2	TRUE	794.247
LRB420	irld-11 in MY	d1	r5	../d1_r5_irlds/LRB420_d1_r5/Snap-206-Image Export-41.tif	4	TRUE	788.401
LRB420	irld-11 in MY	d1	r5	../d1_r5_irlds/LRB420_d1_r5/Snap-206-Image Export-41.tif	5	TRUE	723.836
LRB420	irld-11 in MY	d1	r5	../d1_r5_irlds/LRB420_d1_r5/Snap-206-Image Export-41.tif	7	TRUE	810.633
LRB420	irld-11 in MY	d1	r5	../d1_r5_irlds/LRB420_d1_r5/Snap-189-Image Export-24.tif	0	TRUE	811.928
LRB420	irld-11 in MY	d1	r5	../d1_r5_irlds/LRB420_d1_r5/Snap-189-Image Export-24.tif	1	TRUE	795.189
LRB420	irld-11 in MY	d1	r5	../d1_r5_irlds/LRB420_d1_r5/Snap-189-Image Export-24.tif	2	TRUE	804.696
LRB420	irld-11 in MY	d1	r5	../d1_r5_irlds/LRB420_d1_r5/Snap-192-Image Export-27.tif	1	TRUE	780.319
LRB420	irld-11 in MY	d1	r5	../d1_r5_irlds/LRB420_d1_r5/Snap-192-Image Export-27.tif	2	TRUE	746.826
LRB420	irld-11 in MY	d1	r5	../d1_r5_irlds/LRB420_d1_r5/Snap-205-Image Export-40.tif	0	TRUE	803.493
LRB420	irld-11 in MY	d1	r5	../d1_r5_irlds/LRB420_d1_r5/Snap-205-Image Export-40.tif	1	TRUE	792.508
LRB420	irld-11 in MY	d1	r5	../d1_r5_irlds/LRB420_d1_r5/Snap-205-Image Export-40.tif	2	TRUE	773.218
LRB420	irld-11 in MY	d1	r5	../d1_r5_irlds/LRB420_d1_r5/Snap-205-Image Export-40.tif	3	TRUE	800.498
LRB420	irld-11 in MY	d1	r5	../d1_r5_irlds/LRB420_d1_r5/Snap-205-Image Export-40.tif	4	TRUE	771.387
LRB420	irld-11 in MY	d1	r5	../d1_r5_irlds/LRB420_d1_r5/Snap-205-Image Export-40.tif	5	TRUE	825.595
LRB420	irld-11 in MY	d1	r5	../d1_r5_irlds/LRB420_d1_r5/Snap-218-Image Export-53.tif	1	TRUE	784.295
LRB420	irld-11 in MY	d1	r5	../d1_r5_irlds/LRB420_d1_r5/Snap-191-Image Export-26.tif	0	TRUE	762.768
LRB420	irld-11 in MY	d1	r5	../d1_r5_irlds/LRB420_d1_r5/Snap-228-Image Export-63.tif	0	TRUE	803.217
LRB420	irld-11 in MY	d1	r5	../d1_r5_irlds/LRB420_d1_r5/Snap-228-Image Export-63.tif	1	TRUE	773.662
LRB420	irld-11 in MY	d1	r5	../d1_r5_irlds/LRB420_d1_r5/Snap-231-Image Export-66.tif	0	TRUE	746.734
LRB420	irld-11 in MY	d1	r5	../d1_r5_irlds/LRB420_d1_r5/Snap-231-Image Export-66.tif	1	TRUE	747.232
LRB420	irld-11 in MY	d1	r5	../d1_r5_irlds/LRB420_d1_r5/Snap-195-Image Export-30.tif	0	TRUE	788.938
LRB420	irld-11 in MY	d1	r5	../d1_r5_irlds/LRB420_d1_r5/Snap-195-Image Export-30.tif	1	TRUE	786.034
LRB420	irld-11 in MY	d1	r5	../d1_r5_irlds/LRB420_d1_r5/Snap-219-Image Export-54.tif	0	TRUE	771.609
LRB420	irld-11 in MY	d1	r5	../d1_r5_irlds/LRB420_d1_r5/Snap-219-Image Export-54.tif	1	TRUE	824.706
LRB420	irld-11 in MY	d1	r5	../d1_r5_irlds/LRB420_d1_r5/Snap-230-Image Export-65.tif	0	TRUE	760.271
LRB420	irld-11 in MY	d1	r5	../d1_r5_irlds/LRB420_d1_r5/Snap-230-Image Export-65.tif	1	TRUE	753.391
LRB420	irld-11 in MY	d1	r5	../d1_r5_irlds/LRB420_d1_r5/Snap-232-Image Export-67.tif	0	TRUE	764.691
LRB420	irld-11 in MY	d1	r5	../d1_r5_irlds/LRB420_d1_r5/Snap-232-Image Export-67.tif	1	TRUE	802.421
LRB420	irld-11 in MY	d1	r5	../d1_r5_irlds/LRB420_d1_r5/Snap-229-Image Export-64.tif	0	TRUE	797.686
LRB420	irld-11 in MY	d8	r5	../d8_r5_irlds/LRB420_d8_r5/Snap-869-Image Export-24.tif	0	TRUE	428.497
LRB420	irld-11 in MY	d8	r5	../d8_r5_irlds/LRB420_d8_r5/Snap-870-Image Export-25.tif	1	TRUE	551.16
LRB420	irld-11 in MY	d8	r5	../d8_r5_irlds/LRB420_d8_r5/Snap-870-Image Export-25.tif	2	TRUE	449.982
LRB420	irld-11 in MY	d8	r5	../d8_r5_irlds/LRB420_d8_r5/Snap-859-Image Export-14.tif	0	TRUE	460.981
LRB420	irld-11 in MY	d8	r5	../d8_r5_irlds/LRB420_d8_r5/Snap-871-Image Export-26.tif	1	TRUE	475.167
LRB420	irld-11 in MY	d8	r5	../d8_r5_irlds/LRB420_d8_r5/Snap-868-Image Export-23.tif	0	TRUE	465.064
LRB420	irld-11 in MY	d8	r5	../d8_r5_irlds/LRB420_d8_r5/Snap-847-Image Export-02.tif	1	TRUE	567.657
LRB420	irld-11 in MY	d8	r5	../d8_r5_irlds/LRB420_d8_r5/Snap-858-Image Export-13.tif	0	TRUE	527.519
LRB420	irld-11 in MY	d8	r5	../d8_r5_irlds/LRB420_d8_r5/Snap-877-Image Export-32.tif	0	TRUE	405.276
LRB420	irld-11 in MY	d8	r5	../d8_r5_irlds/LRB420_d8_r5/Snap-881-Image Export-36.tif	0	TRUE	426.734
LRB420	irld-11 in MY	d8	r5	../d8_r5_irlds/LRB420_d8_r5/Snap-881-Image Export-36.tif	1	TRUE	479.442
LRB420	irld-11 in MY	d8	r5	../d8_r5_irlds/LRB420_d8_r5/Snap-881-Image Export-36.tif	2	TRUE	569.091
LRB420	irld-11 in MY	d8	r5	../d8_r5_irlds/LRB420_d8_r5/Snap-881-Image Export-36.tif	3	TRUE	468.307
LRB420	irld-11 in MY	d8	r5	../d8_r5_irlds/LRB420_d8_r5/Snap-888-Image Export-43.tif	0	TRUE	449.891
LRB420	irld-11 in MY	d8	r5	../d8_r5_irlds/LRB420_d8_r5/Snap-846-Image Export-01.tif	0	TRUE	462.022
LRB420	irld-11 in MY	d8	r5	../d8_r5_irlds/LRB420_d8_r5/Snap-848-Image Export-03.tif	0	TRUE	477.085
LRB420	irld-11 in MY	d8	r5	../d8_r5_irlds/LRB420_d8_r5/Snap-855-Image Export-10.tif	0	TRUE	554.073
LRB420	irld-11 in MY	d8	r5	../d8_r5_irlds/LRB420_d8_r5/Snap-867-Image Export-22.tif	0	TRUE	405.806
LRB420	irld-11 in MY	d8	r5	../d8_r5_irlds/LRB420_d8_r5/Snap-886-Image Export-41.tif	0	TRUE	432.8
LRB420	irld-11 in MY	d8	r5	../d8_r5_irlds/LRB420_d8_r5/Snap-863-Image Export-18.tif	3	TRUE	491.308
LRB420	irld-11 in MY	d8	r5	../d8_r5_irlds/LRB420_d8_r5/Snap-857-Image Export-12.tif	0	TRUE	475.231
LRB420	irld-11 in MY	d8	r5	../d8_r5_irlds/LRB420_d8_r5/Snap-865-Image Export-20.tif	0	TRUE	497.858
LRB420	irld-11 in MY	d8	r5	../d8_r5_irlds/LRB420_d8_r5/Snap-856-Image Export-11.tif	0	TRUE	472.189
LRB420	irld-11 in MY	d8	r5	../d8_r5_irlds/LRB420_d8_r5/Snap-885-Image Export-40.tif	0	TRUE	430.196
LRB420	irld-11 in MY	d8	r5	../d8_r5_irlds/LRB420_d8_r5/Snap-866-Image Export-21.tif	0	TRUE	550.191
LRB420	irld-11 in MY	d8	r5	../d8_r5_irlds/LRB420_d8_r5/Snap-866-Image Export-21.tif	2	TRUE	416.832
LRB420	irld-11 in MY	d8	r5	../d8_r5_irlds/LRB420_d8_r5/Snap-866-Image Export-21.tif	3	TRUE	529.502
LRB420	irld-11 in MY	d8	r5	../d8_r5_irlds/LRB420_d8_r5/Snap-852-Image Export-07.tif	0	TRUE	459.592
LRB420	irld-11 in MY	d8	r5	../d8_r5_irlds/LRB420_d8_r5/Snap-849-Image Export-04.tif	2	TRUE	307.424
LRB420	irld-11 in MY	d8	r5	../d8_r5_irlds/LRB420_d8_r5/Snap-864-Image Export-19.tif	4	TRUE	469.741
LRB420	irld-11 in MY	d8	r5	../d8_r5_irlds/LRB420_d8_r5/Snap-853-Image Export-08.tif	0	TRUE	437.851
LRB420	irld-11 in MY	d8	r5	../d8_r5_irlds/LRB420_d8_r5/Snap-853-Image Export-08.tif	1	TRUE	418.221
LRB420	irld-11 in MY	d8	r5	../d8_r5_irlds/LRB420_d8_r5/Snap-854-Image Export-09.tif	0	TRUE	537.64
LRB420	irld-11 in MY	d8	r5	../d8_r5_irlds/LRB420_d8_r5/Snap-883-Image Export-38.tif	0	TRUE	390.478
LRB420	irld-11 in MY	d8	r5	../d8_r5_irlds/LRB420_d8_r5/Snap-874-Image Export-29.tif	0	TRUE	440.783
LRB420	irld-11 in MY	d8	r5	../d8_r5_irlds/LRB420_d8_r5/Snap-874-Image Export-29.tif	1	TRUE	468.481
LRB420	irld-11 in MY	d8	r5	../d8_r5_irlds/LRB420_d8_r5/Snap-873-Image Export-28.tif	0	TRUE	458.295
LRB420	irld-11 in MY	d8	r5	../d8_r5_irlds/LRB420_d8_r5/Snap-873-Image Export-28.tif	1	TRUE	533.41
LRB420	irld-11 in MY	d8	r5	../d8_r5_irlds/LRB420_d8_r5/Snap-884-Image Export-39.tif	0	TRUE	456.55
LRB423	irld-11 in N2	d1	r1	../d1_r1_irlds/LRB423_d1_r1/Snap-104287-Image Export-105.tif	0	TRUE	736.338
LRB423	irld-11 in N2	d1	r1	../d1_r1_irlds/LRB423_d1_r1/Snap-104266-Image Export-84.tif	0	TRUE	848.769
LRB423	irld-11 in N2	d1	r1	../d1_r1_irlds/LRB423_d1_r1/Snap-104266-Image Export-84.tif	1	TRUE	749.821
LRB423	irld-11 in N2	d1	r1	../d1_r1_irlds/LRB423_d1_r1/Snap-104266-Image Export-84.tif	2	TRUE	777.73
LRB423	irld-11 in N2	d1	r1	../d1_r1_irlds/LRB423_d1_r1/Snap-104288-Image Export-106.tif	0	TRUE	708.208
LRB423	irld-11 in N2	d1	r1	../d1_r1_irlds/LRB423_d1_r1/Snap-104317-Image Export-135.tif	2	TRUE	812.648
LRB423	irld-11 in N2	d1	r1	../d1_r1_irlds/LRB423_d1_r1/Snap-104317-Image Export-135.tif	3	TRUE	751.56
LRB423	irld-11 in N2	d1	r1	../d1_r1_irlds/LRB423_d1_r1/Snap-104317-Image Export-135.tif	4	TRUE	804.658
LRB423	irld-11 in N2	d1	r1	../d1_r1_irlds/LRB423_d1_r1/Snap-104317-Image Export-135.tif	5	TRUE	747.546
LRB423	irld-11 in N2	d1	r1	../d1_r1_irlds/LRB423_d1_r1/Snap-104317-Image Export-135.tif	6	TRUE	801.348
LRB423	irld-11 in N2	d1	r1	../d1_r1_irlds/LRB423_d1_r1/Snap-104300-Image Export-118.tif	0	TRUE	815.904
LRB423	irld-11 in N2	d1	r1	../d1_r1_irlds/LRB423_d1_r1/Snap-104278-Image Export-96.tif	0	TRUE	815.498
LRB423	irld-11 in N2	d1	r1	../d1_r1_irlds/LRB423_d1_r1/Snap-104278-Image Export-96.tif	2	TRUE	771.831
LRB423	irld-11 in N2	d1	r1	../d1_r1_irlds/LRB423_d1_r1/Snap-104278-Image Export-96.tif	4	TRUE	750.71
LRB423	irld-11 in N2	d1	r1	../d1_r1_irlds/LRB423_d1_r1/Snap-104278-Image Export-96.tif	5	TRUE	790.807
LRB423	irld-11 in N2	d1	r1	../d1_r1_irlds/LRB423_d1_r1/Snap-104278-Image Export-96.tif	6	TRUE	748.435
LRB423	irld-11 in N2	d1	r1	../d1_r1_irlds/LRB423_d1_r1/Snap-104278-Image Export-96.tif	8	TRUE	759.106
LRB423	irld-11 in N2	d1	r1	../d1_r1_irlds/LRB423_d1_r1/Snap-104263-Image Export-81.tif	1	TRUE	749.415
LRB423	irld-11 in N2	d1	r1	../d1_r1_irlds/LRB423_d1_r1/Snap-104263-Image Export-81.tif	2	TRUE	760.401
LRB423	irld-11 in N2	d1	r1	../d1_r1_irlds/LRB423_d1_r1/Snap-104279-Image Export-97.tif	1	TRUE	826.798
LRB423	irld-11 in N2	d1	r1	../d1_r1_irlds/LRB423_d1_r1/Snap-104279-Image Export-97.tif	2	TRUE	827.648
LRB423	irld-11 in N2	d1	r1	../d1_r1_irlds/LRB423_d1_r1/Snap-104279-Image Export-97.tif	3	TRUE	810.633
LRB423	irld-11 in N2	d1	r1	../d1_r1_irlds/LRB423_d1_r1/Snap-104262-Image Export-80.tif	0	TRUE	726.111
LRB423	irld-11 in N2	d1	r1	../d1_r1_irlds/LRB423_d1_r1/Snap-104305-Image Export-123.tif	0	TRUE	747.232
LRB423	irld-11 in N2	d1	r1	../d1_r1_irlds/LRB423_d1_r1/Snap-104305-Image Export-123.tif	1	TRUE	793.802
LRB423	irld-11 in N2	d1	r1	../d1_r1_irlds/LRB423_d1_r1/Snap-104305-Image Export-123.tif	2	TRUE	780.986
LRB423	irld-11 in N2	d1	r1	../d1_r1_irlds/LRB423_d1_r1/Snap-104305-Image Export-123.tif	3	TRUE	716.734
LRB423	irld-11 in N2	d1	r1	../d1_r1_irlds/LRB423_d1_r1/Snap-104260-Image Export-78.tif	1	TRUE	740.314
LRB423	irld-11 in N2	d1	r1	../d1_r1_irlds/LRB423_d1_r1/Snap-104264-Image Export-82.tif	0	TRUE	822.247
LRB423	irld-11 in N2	d1	r1	../d1_r1_irlds/LRB423_d1_r1/Snap-104264-Image Export-82.tif	2	TRUE	764.599
LRB423	irld-11 in N2	d1	r1	../d1_r1_irlds/LRB423_d1_r1/Snap-104264-Image Export-82.tif	3	TRUE	668.647
LRB423	irld-11 in N2	d1	r1	../d1_r1_irlds/LRB423_d1_r1/Snap-104311-Image Export-129.tif	0	TRUE	754.87
LRB423	irld-11 in N2	d1	r1	../d1_r1_irlds/LRB423_d1_r1/Snap-104311-Image Export-129.tif	1	TRUE	726.111
LRB423	irld-11 in N2	d1	r1	../d1_r1_irlds/LRB423_d1_r1/Snap-104311-Image Export-129.tif	2	TRUE	724.28
LRB423	irld-11 in N2	d1	r1	../d1_r1_irlds/LRB423_d1_r1/Snap-104311-Image Export-129.tif	3	TRUE	724.686
LRB423	irld-11 in N2	d1	r1	../d1_r1_irlds/LRB423_d1_r1/Snap-104311-Image Export-129.tif	4	TRUE	727.053
LRB423	irld-11 in N2	d1	r1	../d1_r1_irlds/LRB423_d1_r1/Snap-104311-Image Export-129.tif	5	TRUE	732.14
LRB423	irld-11 in N2	d1	r1	../d1_r1_irlds/LRB423_d1_r1/Snap-104311-Image Export-129.tif	6	TRUE	784.333
LRB423	irld-11 in N2	d1	r1	../d1_r1_irlds/LRB423_d1_r1/Snap-104312-Image Export-130.tif	0	TRUE	705.082
LRB423	irld-11 in N2	d1	r1	../d1_r1_irlds/LRB423_d1_r1/Snap-104312-Image Export-130.tif	1	TRUE	775.233
LRB423	irld-11 in N2	d1	r1	../d1_r1_irlds/LRB423_d1_r1/Snap-104265-Image Export-83.tif	0	TRUE	813.851
LRB423	irld-11 in N2	d1	r1	../d1_r1_irlds/LRB423_d1_r1/Snap-104265-Image Export-83.tif	1	TRUE	746.512
LRB423	irld-11 in N2	d1	r1	../d1_r1_irlds/LRB423_d1_r1/Snap-104282-Image Export-100.tif	1	TRUE	721.691
LRB423	irld-11 in N2	d1	r1	../d1_r1_irlds/LRB423_d1_r1/Snap-104282-Image Export-100.tif	2	TRUE	807.507
LRB423	irld-11 in N2	d1	r1	../d1_r1_irlds/LRB423_d1_r1/Snap-104289-Image Export-107.tif	0	TRUE	813
LRB423	irld-11 in N2	d1	r1	../d1_r1_irlds/LRB423_d1_r1/Snap-104316-Image Export-134.tif	0	TRUE	781.078
LRB423	irld-11 in N2	d1	r1	../d1_r1_irlds/LRB423_d1_r1/Snap-104316-Image Export-134.tif	1	TRUE	780.227
LRB423	irld-11 in N2	d1	r1	../d1_r1_irlds/LRB423_d1_r1/Snap-104316-Image Export-134.tif	2	TRUE	797.686
LRB423	irld-11 in N2	d1	r1	../d1_r1_irlds/LRB423_d1_r1/Snap-104316-Image Export-134.tif	3	TRUE	711.371
LRB423	irld-11 in N2	d1	r1	../d1_r1_irlds/LRB423_d1_r1/Snap-104301-Image Export-119.tif	0	TRUE	714.237
LRB423	irld-11 in N2	d1	r1	../d1_r1_irlds/LRB423_d1_r1/Snap-104301-Image Export-119.tif	1	TRUE	702.086
LRB423	irld-11 in N2	d1	r1	../d1_r1_irlds/LRB423_d1_r1/Snap-104286-Image Export-104.tif	0	TRUE	791.879
LRB423	irld-11 in N2	d1	r1	../d1_r1_irlds/LRB423_d1_r1/Snap-104274-Image Export-92.tif	1	TRUE	691.415
LRB423	irld-11 in N2	d1	r1	../d1_r1_irlds/LRB423_d1_r1/Snap-104274-Image Export-92.tif	2	TRUE	730.753
LRB423	irld-11 in N2	d1	r1	../d1_r1_irlds/LRB423_d1_r1/Snap-104275-Image Export-93.tif	1	TRUE	783.981
LRB423	irld-11 in N2	d1	r1	../d1_r1_irlds/LRB423_d1_r1/Snap-104275-Image Export-93.tif	3	TRUE	722.985
LRB423	irld-11 in N2	d1	r1	../d1_r1_irlds/LRB423_d1_r1/Snap-104275-Image Export-93.tif	4	TRUE	678.246
LRB423	irld-11 in N2	d1	r1	../d1_r1_irlds/LRB423_d1_r1/Snap-104275-Image Export-93.tif	5	TRUE	720.396
LRB423	irld-11 in N2	d1	r1	../d1_r1_irlds/LRB423_d1_r1/Snap-104275-Image Export-93.tif	7	TRUE	745.623
LRB423	irld-11 in N2	d1	r1	../d1_r1_irlds/LRB423_d1_r1/Snap-104258-Image Export-76.tif	0	TRUE	795.227
LRB423	irld-11 in N2	d1	r1	../d1_r1_irlds/LRB423_d1_r1/Snap-104258-Image Export-76.tif	1	TRUE	800.184
LRB423	irld-11 in N2	d1	r1	../d1_r1_irlds/LRB423_d1_r1/Snap-104283-Image Export-101.tif	0	TRUE	757.812
LRB423	irld-11 in N2	d1	r1	../d1_r1_irlds/LRB423_d1_r1/Snap-104283-Image Export-101.tif	2	TRUE	775.14
LRB423	irld-11 in N2	d1	r1	../d1_r1_irlds/LRB423_d1_r1/Snap-104283-Image Export-101.tif	3	TRUE	746.826
LRB423	irld-11 in N2	d1	r1	../d1_r1_irlds/LRB423_d1_r1/Snap-104283-Image Export-101.tif	4	TRUE	739.816
LRB423	irld-11 in N2	d1	r1	../d1_r1_irlds/LRB423_d1_r1/Snap-104283-Image Export-101.tif	5	TRUE	729.329
LRB423	irld-11 in N2	d1	r1	../d1_r1_irlds/LRB423_d1_r1/Snap-104283-Image Export-101.tif	6	TRUE	783.797
LRB423	irld-11 in N2	d1	r1	../d1_r1_irlds/LRB423_d1_r1/Snap-104277-Image Export-95.tif	0	TRUE	821.083
LRB423	irld-11 in N2	d1	r1	../d1_r1_irlds/LRB423_d1_r1/Snap-104277-Image Export-95.tif	2	TRUE	779.247
LRB423	irld-11 in N2	d1	r1	../d1_r1_irlds/LRB423_d1_r1/Snap-104277-Image Export-95.tif	5	TRUE	701.198
LRB423	irld-11 in N2	d1	r1	../d1_r1_irlds/LRB423_d1_r1/Snap-104277-Image Export-95.tif	6	TRUE	784.648
LRB423	irld-11 in N2	d1	r1	../d1_r1_irlds/LRB423_d1_r1/Snap-104277-Image Export-95.tif	7	TRUE	766.116
LRB423	irld-11 in N2	d1	r1	../d1_r1_irlds/LRB423_d1_r1/Snap-104277-Image Export-95.tif	8	TRUE	696.149
LRB423	irld-11 in N2	d1	r1	../d1_r1_irlds/LRB423_d1_r1/Snap-104313-Image Export-131.tif	1	TRUE	628.014
LRB423	irld-11 in N2	d1	r1	../d1_r1_irlds/LRB423_d1_r1/Snap-104313-Image Export-131.tif	2	TRUE	739.908
LRB423	irld-11 in N2	d1	r1	../d1_r1_irlds/LRB423_d1_r1/Snap-104313-Image Export-131.tif	3	TRUE	795.411
LRB423	irld-11 in N2	d1	r1	../d1_r1_irlds/LRB423_d1_r1/Snap-104313-Image Export-131.tif	4	TRUE	795.633
LRB423	irld-11 in N2	d1	r1	../d1_r1_irlds/LRB423_d1_r1/Snap-104276-Image Export-94.tif	0	TRUE	728.256
LRB423	irld-11 in N2	d1	r1	../d1_r1_irlds/LRB423_d1_r1/Snap-104276-Image Export-94.tif	2	TRUE	782.15
LRB423	irld-11 in N2	d1	r1	../d1_r1_irlds/LRB423_d1_r1/Snap-104276-Image Export-94.tif	4	TRUE	714.903
LRB423	irld-11 in N2	d1	r1	../d1_r1_irlds/LRB423_d1_r1/Snap-104276-Image Export-94.tif	5	TRUE	752.097
LRB423	irld-11 in N2	d1	r1	../d1_r1_irlds/LRB423_d1_r1/Snap-104304-Image Export-122.tif	2	TRUE	737.097
LRB423	irld-11 in N2	d1	r1	../d1_r1_irlds/LRB423_d1_r1/Snap-104304-Image Export-122.tif	3	TRUE	745.845
LRB423	irld-11 in N2	d1	r1	../d1_r1_irlds/LRB423_d1_r1/Snap-104304-Image Export-122.tif	4	TRUE	759.734
LRB423	irld-11 in N2	d1	r1	../d1_r1_irlds/LRB423_d1_r1/Snap-104268-Image Export-86.tif	1	TRUE	802.199
LRB423	irld-11 in N2	d1	r1	../d1_r1_irlds/LRB423_d1_r1/Snap-104268-Image Export-86.tif	3	TRUE	685.033
LRB423	irld-11 in N2	d1	r1	../d1_r1_irlds/LRB423_d1_r1/Snap-104268-Image Export-86.tif	5	TRUE	721.154
LRB423	irld-11 in N2	d1	r1	../d1_r1_irlds/LRB423_d1_r1/Snap-104273-Image Export-91.tif	1	TRUE	836.527
LRB423	irld-11 in N2	d1	r1	../d1_r1_irlds/LRB423_d1_r1/Snap-104294-Image Export-112.tif	0	TRUE	724.372
LRB423	irld-11 in N2	d1	r1	../d1_r1_irlds/LRB423_d1_r1/Snap-104269-Image Export-87.tif	0	TRUE	793.58
LRB423	irld-11 in N2	d1	r1	../d1_r1_irlds/LRB423_d1_r1/Snap-104269-Image Export-87.tif	1	TRUE	760.049
LRB423	irld-11 in N2	d1	r1	../d1_r1_irlds/LRB423_d1_r1/Snap-104272-Image Export-90.tif	0	TRUE	794.377
LRB423	irld-11 in N2	d1	r1	../d1_r1_irlds/LRB423_d1_r1/Snap-104315-Image Export-133.tif	0	TRUE	811.798
LRB423	irld-11 in N2	d1	r1	../d1_r1_irlds/LRB423_d1_r1/Snap-104315-Image Export-133.tif	1	TRUE	729.589
LRB423	irld-11 in N2	d1	r1	../d1_r1_irlds/LRB423_d1_r1/Snap-104315-Image Export-133.tif	2	TRUE	731.512
LRB423	irld-11 in N2	d1	r1	../d1_r1_irlds/LRB423_d1_r1/Snap-104315-Image Export-133.tif	3	TRUE	742.59
LRB423	irld-11 in N2	d1	r1	../d1_r1_irlds/LRB423_d1_r1/Snap-104285-Image Export-103.tif	0	TRUE	795.947
LRB423	irld-11 in N2	d1	r1	../d1_r1_irlds/LRB423_d1_r1/Snap-104292-Image Export-110.tif	0	TRUE	789.382
LRB423	irld-11 in N2	d1	r1	../d1_r1_irlds/LRB423_d1_r1/Snap-104291-Image Export-109.tif	0	TRUE	772.995
LRB423	irld-11 in N2	d1	r1	../d1_r1_irlds/LRB423_d1_r1/Snap-104270-Image Export-88.tif	1	TRUE	720.082
LRB423	irld-11 in N2	d1	r1	../d1_r1_irlds/LRB423_d1_r1/Snap-104270-Image Export-88.tif	2	TRUE	769.019
LRB423	irld-11 in N2	d1	r1	../d1_r1_irlds/LRB423_d1_r1/Snap-104302-Image Export-120.tif	0	TRUE	795.855
LRB423	irld-11 in N2	d1	r1	../d1_r1_irlds/LRB423_d1_r1/Snap-104302-Image Export-120.tif	1	TRUE	619.709
LRB423	irld-11 in N2	d1	r1	../d1_r1_irlds/LRB423_d1_r1/Snap-104302-Image Export-120.tif	3	TRUE	742.405
LRB423	irld-11 in N2	d1	r1	../d1_r1_irlds/LRB423_d1_r1/Snap-104302-Image Export-120.tif	4	TRUE	763.527
LRB423	irld-11 in N2	d1	r1	../d1_r1_irlds/LRB423_d1_r1/Snap-104307-Image Export-125.tif	0	TRUE	746.067
LRB423	irld-11 in N2	d1	r1	../d1_r1_irlds/LRB423_d1_r1/Snap-104307-Image Export-125.tif	1	TRUE	702.086
LRB423	irld-11 in N2	d1	r1	../d1_r1_irlds/LRB423_d1_r1/Snap-104307-Image Export-125.tif	2	TRUE	767.817
LRB423	irld-11 in N2	d1	r1	../d1_r1_irlds/LRB423_d1_r1/Snap-104308-Image Export-126.tif	0	TRUE	709.41
LRB423	irld-11 in N2	d1	r1	../d1_r1_irlds/LRB423_d1_r1/Snap-104308-Image Export-126.tif	1	TRUE	736.024
LRB423	irld-11 in N2	d1	r1	../d1_r1_irlds/LRB423_d1_r1/Snap-104308-Image Export-126.tif	3	TRUE	712.092
LRB423	irld-11 in N2	d1	r1	../d1_r1_irlds/LRB423_d1_r1/Snap-104297-Image Export-115.tif	0	TRUE	765.764
LRB423	irld-11 in N2	d1	r1	../d1_r1_irlds/LRB423_d1_r1/Snap-104280-Image Export-98.tif	0	TRUE	783.797
LRB423	irld-11 in N2	d1	r1	../d1_r1_irlds/LRB423_d1_r1/Snap-104280-Image Export-98.tif	1	TRUE	776.657
LRB423	irld-11 in N2	d1	r1	../d1_r1_irlds/LRB423_d1_r1/Snap-104280-Image Export-98.tif	2	TRUE	796.077
LRB423	irld-11 in N2	d1	r1	../d1_r1_irlds/LRB423_d1_r1/Snap-104280-Image Export-98.tif	4	TRUE	788.624
LRB423	irld-11 in N2	d1	r1	../d1_r1_irlds/LRB423_d1_r1/Snap-104280-Image Export-98.tif	5	TRUE	829.257
LRB423	irld-11 in N2	d1	r1	../d1_r1_irlds/LRB423_d1_r1/Snap-104281-Image Export-99.tif	0	TRUE	728.478
LRB423	irld-11 in N2	d1	r1	../d1_r1_irlds/LRB423_d1_r1/Snap-104281-Image Export-99.tif	1	TRUE	789.734
LRB423	irld-11 in N2	d1	r1	../d1_r1_irlds/LRB423_d1_r1/Snap-104281-Image Export-99.tif	2	TRUE	803.623
LRB423	irld-11 in N2	d1	r1	../d1_r1_irlds/LRB423_d1_r1/Snap-104303-Image Export-121.tif	0	TRUE	817.068
LRB423	irld-11 in N2	d1	r1	../d1_r1_irlds/LRB423_d1_r1/Snap-104303-Image Export-121.tif	1	TRUE	734.101
LRB423	irld-11 in N2	d1	r1	../d1_r1_irlds/LRB423_d1_r1/Snap-104303-Image Export-121.tif	2	TRUE	789.604
LRB423	irld-11 in N2	d1	r1	../d1_r1_irlds/LRB423_d1_r1/Snap-104303-Image Export-121.tif	3	TRUE	739.816
LRB423	irld-11 in N2	d1	r1	../d1_r1_irlds/LRB423_d1_r1/Snap-104293-Image Export-111.tif	0	TRUE	792.73
LRB423	irld-11 in N2	d1	r1	../d1_r1_irlds/LRB423_d1_r1/Snap-104293-Image Export-111.tif	1	TRUE	794.745
LRB423	irld-11 in N2	d1	r1	../d1_r1_irlds/LRB423_d1_r1/Snap-104293-Image Export-111.tif	2	TRUE	801.348
LRB423	irld-11 in N2	d1	r1	../d1_r1_irlds/LRB423_d1_r1/Snap-104290-Image Export-108.tif	0	TRUE	722.005
LRB423	irld-11 in N2	d1	r1	../d1_r1_irlds/LRB423_d1_r1/Snap-104284-Image Export-102.tif	0	TRUE	806.083
LRB423	irld-11 in N2	d1	r1	../d1_r1_irlds/LRB423_d1_r1/Snap-104284-Image Export-102.tif	1	TRUE	781.522
LRB423	irld-11 in N2	d1	r1	../d1_r1_irlds/LRB423_d1_r1/Snap-104284-Image Export-102.tif	3	TRUE	789.29
LRB423	irld-11 in N2	d1	r1	../d1_r1_irlds/LRB423_d1_r1/Snap-104309-Image Export-127.tif	0	TRUE	734.952
LRB423	irld-11 in N2	d1	r1	../d1_r1_irlds/LRB423_d1_r1/Snap-104309-Image Export-127.tif	1	TRUE	710.169
LRB423	irld-11 in N2	d1	r1	../d1_r1_irlds/LRB423_d1_r1/Snap-104309-Image Export-127.tif	2	TRUE	769.556
LRB423	irld-11 in N2	d1	r1	../d1_r1_irlds/LRB423_d1_r1/Snap-104309-Image Export-127.tif	3	TRUE	734.415
LRB423	irld-11 in N2	d1	r1	../d1_r1_irlds/LRB423_d1_r1/Snap-104296-Image Export-114.tif	0	TRUE	737.763
LRB423	irld-11 in N2	d1	r1	../d1_r1_irlds/LRB423_d1_r1/Snap-104306-Image Export-124.tif	0	TRUE	805.546
LRB423	irld-11 in N2	d1	r1	../d1_r1_irlds/LRB423_d1_r1/Snap-104306-Image Export-124.tif	1	TRUE	780.005
LRB423	irld-11 in N2	d1	r1	../d1_r1_irlds/LRB423_d1_r1/Snap-104306-Image Export-124.tif	2	TRUE	808.894
LRB423	irld-11 in N2	d1	r1	../d1_r1_irlds/LRB423_d1_r1/Snap-104306-Image Export-124.tif	3	TRUE	777.508
LRB423	irld-11 in N2	d8	r1	../d8_r1_irlds/LRB423_d8_r1/Snap-517-Image Export-27.tif	2	TRUE	409.753
LRB423	irld-11 in N2	d8	r1	../d8_r1_irlds/LRB423_d8_r1/Snap-516-Image Export-26.tif	0	TRUE	609.604
LRB423	irld-11 in N2	d8	r1	../d8_r1_irlds/LRB423_d8_r1/Snap-516-Image Export-26.tif	1	TRUE	645.111
LRB423	irld-11 in N2	d8	r1	../d8_r1_irlds/LRB423_d8_r1/Snap-515-Image Export-25.tif	0	TRUE	580.053
LRB423	irld-11 in N2	d8	r1	../d8_r1_irlds/LRB423_d8_r1/Snap-529-Image Export-39.tif	0	TRUE	556.412
LRB423	irld-11 in N2	d8	r1	../d8_r1_irlds/LRB423_d8_r1/Snap-528-Image Export-38.tif	0	TRUE	671.703
LRB423	irld-11 in N2	d8	r1	../d8_r1_irlds/LRB423_d8_r1/Snap-528-Image Export-38.tif	1	TRUE	571.869
LRB423	irld-11 in N2	d8	r1	../d8_r1_irlds/LRB423_d8_r1/Snap-538-Image Export-48.tif	0	TRUE	567.831
LRB423	irld-11 in N2	d8	r1	../d8_r1_irlds/LRB423_d8_r1/Snap-538-Image Export-48.tif	2	TRUE	601.594
LRB423	irld-11 in N2	d8	r1	../d8_r1_irlds/LRB423_d8_r1/Snap-538-Image Export-48.tif	4	TRUE	599.831
LRB423	irld-11 in N2	d8	r1	../d8_r1_irlds/LRB423_d8_r1/Snap-538-Image Export-48.tif	5	TRUE	513.999
LRB423	irld-11 in N2	d8	r1	../d8_r1_irlds/LRB423_d8_r1/Snap-518-Image Export-28.tif	0	TRUE	500.571
LRB423	irld-11 in N2	d8	r1	../d8_r1_irlds/LRB423_d8_r1/Snap-518-Image Export-28.tif	1	TRUE	454.787
LRB423	irld-11 in N2	d8	r1	../d8_r1_irlds/LRB423_d8_r1/Snap-518-Image Export-28.tif	2	TRUE	480.547
LRB423	irld-11 in N2	d8	r1	../d8_r1_irlds/LRB423_d8_r1/Snap-518-Image Export-28.tif	3	TRUE	475.45
LRB423	irld-11 in N2	d8	r1	../d8_r1_irlds/LRB423_d8_r1/Snap-518-Image Export-28.tif	4	TRUE	523.902
LRB423	irld-11 in N2	d8	r1	../d8_r1_irlds/LRB423_d8_r1/Snap-519-Image Export-29.tif	2	TRUE	610.043
LRB423	irld-11 in N2	d8	r1	../d8_r1_irlds/LRB423_d8_r1/Snap-519-Image Export-29.tif	4	TRUE	556.851
LRB423	irld-11 in N2	d8	r1	../d8_r1_irlds/LRB423_d8_r1/Snap-519-Image Export-29.tif	5	TRUE	522.403
LRB423	irld-11 in N2	d8	r1	../d8_r1_irlds/LRB423_d8_r1/Snap-526-Image Export-36.tif	0	TRUE	596.724
LRB423	irld-11 in N2	d8	r1	../d8_r1_irlds/LRB423_d8_r1/Snap-526-Image Export-36.tif	2	TRUE	438.161
LRB423	irld-11 in N2	d8	r1	../d8_r1_irlds/LRB423_d8_r1/Snap-526-Image Export-36.tif	5	TRUE	552.284
LRB423	irld-11 in N2	d8	r1	../d8_r1_irlds/LRB423_d8_r1/Snap-526-Image Export-36.tif	6	TRUE	509.194
LRB423	irld-11 in N2	d8	r1	../d8_r1_irlds/LRB423_d8_r1/Snap-527-Image Export-37.tif	0	TRUE	584.328
LRB423	irld-11 in N2	d8	r1	../d8_r1_irlds/LRB423_d8_r1/Snap-527-Image Export-37.tif	1	TRUE	503.613
LRB423	irld-11 in N2	d8	r1	../d8_r1_irlds/LRB423_d8_r1/Snap-527-Image Export-37.tif	2	TRUE	515.169
LRB423	irld-11 in N2	d8	r1	../d8_r1_irlds/LRB423_d8_r1/Snap-524-Image Export-34.tif	0	TRUE	480.237
LRB423	irld-11 in N2	d8	r1	../d8_r1_irlds/LRB423_d8_r1/Snap-524-Image Export-34.tif	1	TRUE	527.674
LRB423	irld-11 in N2	d8	r1	../d8_r1_irlds/LRB423_d8_r1/Snap-524-Image Export-34.tif	2	TRUE	487.006
LRB423	irld-11 in N2	d8	r1	../d8_r1_irlds/LRB423_d8_r1/Snap-524-Image Export-34.tif	3	TRUE	611.012
LRB423	irld-11 in N2	d8	r1	../d8_r1_irlds/LRB423_d8_r1/Snap-524-Image Export-34.tif	4	TRUE	574.381
LRB423	irld-11 in N2	d8	r1	../d8_r1_irlds/LRB423_d8_r1/Snap-525-Image Export-35.tif	0	TRUE	639.019
LRB423	irld-11 in N2	d8	r1	../d8_r1_irlds/LRB423_d8_r1/Snap-525-Image Export-35.tif	2	TRUE	532.105
LRB423	irld-11 in N2	d8	r1	../d8_r1_irlds/LRB423_d8_r1/Snap-525-Image Export-35.tif	3	TRUE	570.389
LRB423	irld-11 in N2	d8	r1	../d8_r1_irlds/LRB423_d8_r1/Snap-522-Image Export-32.tif	0	TRUE	622.503
LRB423	irld-11 in N2	d8	r1	../d8_r1_irlds/LRB423_d8_r1/Snap-523-Image Export-33.tif	0	TRUE	446.868
LRB423	irld-11 in N2	d8	r1	../d8_r1_irlds/LRB423_d8_r1/Snap-520-Image Export-30.tif	0	TRUE	523.107
LRB423	irld-11 in N2	d8	r1	../d8_r1_irlds/LRB423_d8_r1/Snap-520-Image Export-30.tif	2	TRUE	529.172
LRB423	irld-11 in N2	d8	r1	../d8_r1_irlds/LRB423_d8_r1/Snap-520-Image Export-30.tif	3	TRUE	642.353
LRB423	irld-11 in N2	d8	r1	../d8_r1_irlds/LRB423_d8_r1/Snap-521-Image Export-31.tif	0	TRUE	615.514
LRB423	irld-11 in N2	d8	r1	../d8_r1_irlds/LRB423_d8_r1/Snap-530-Image Export-40.tif	3	TRUE	628.814
LRB423	irld-11 in N2	d8	r1	../d8_r1_irlds/LRB423_d8_r1/Snap-530-Image Export-40.tif	4	TRUE	559.454
LRB423	irld-11 in N2	d8	r1	../d8_r1_irlds/LRB423_d8_r1/Snap-530-Image Export-40.tif	5	TRUE	638.535
LRB423	irld-11 in N2	d8	r1	../d8_r1_irlds/LRB423_d8_r1/Snap-530-Image Export-40.tif	6	TRUE	627.774
LRB423	irld-11 in N2	d8	r1	../d8_r1_irlds/LRB423_d8_r1/Snap-531-Image Export-41.tif	2	TRUE	571.539
LRB423	irld-11 in N2	d8	r1	../d8_r1_irlds/LRB423_d8_r1/Snap-531-Image Export-41.tif	3	TRUE	606.664
LRB423	irld-11 in N2	d8	r1	../d8_r1_irlds/LRB423_d8_r1/Snap-531-Image Export-41.tif	5	TRUE	616.438
LRB423	irld-11 in N2	d8	r1	../d8_r1_irlds/LRB423_d8_r1/Snap-532-Image Export-42.tif	0	TRUE	556.942
LRB423	irld-11 in N2	d8	r1	../d8_r1_irlds/LRB423_d8_r1/Snap-532-Image Export-42.tif	2	TRUE	591.518
LRB423	irld-11 in N2	d8	r1	../d8_r1_irlds/LRB423_d8_r1/Snap-532-Image Export-42.tif	3	TRUE	611.916
LRB423	irld-11 in N2	d8	r1	../d8_r1_irlds/LRB423_d8_r1/Snap-532-Image Export-42.tif	4	TRUE	557.581
LRB423	irld-11 in N2	d8	r1	../d8_r1_irlds/LRB423_d8_r1/Snap-532-Image Export-42.tif	5	TRUE	505.622
LRB423	irld-11 in N2	d8	r1	../d8_r1_irlds/LRB423_d8_r1/Snap-533-Image Export-43.tif	0	TRUE	553.699
LRB423	irld-11 in N2	d8	r1	../d8_r1_irlds/LRB423_d8_r1/Snap-533-Image Export-43.tif	1	TRUE	487.225
LRB423	irld-11 in N2	d8	r1	../d8_r1_irlds/LRB423_d8_r1/Snap-533-Image Export-43.tif	3	TRUE	577.249
LRB423	irld-11 in N2	d8	r1	../d8_r1_irlds/LRB423_d8_r1/Snap-533-Image Export-43.tif	4	TRUE	489.609
LRB423	irld-11 in N2	d8	r1	../d8_r1_irlds/LRB423_d8_r1/Snap-534-Image Export-44.tif	1	TRUE	525.646
LRB423	irld-11 in N2	d8	r1	../d8_r1_irlds/LRB423_d8_r1/Snap-534-Image Export-44.tif	3	TRUE	524.367
LRB423	irld-11 in N2	d8	r1	../d8_r1_irlds/LRB423_d8_r1/Snap-534-Image Export-44.tif	4	TRUE	458.779
LRB423	irld-11 in N2	d8	r1	../d8_r1_irlds/LRB423_d8_r1/Snap-534-Image Export-44.tif	7	TRUE	460.588
LRB423	irld-11 in N2	d8	r1	../d8_r1_irlds/LRB423_d8_r1/Snap-535-Image Export-45.tif	0	TRUE	573.522
LRB423	irld-11 in N2	d8	r1	../d8_r1_irlds/LRB423_d8_r1/Snap-535-Image Export-45.tif	1	TRUE	606.581
LRB423	irld-11 in N2	d8	r1	../d8_r1_irlds/LRB423_d8_r1/Snap-535-Image Export-45.tif	2	TRUE	658.649
LRB423	irld-11 in N2	d8	r1	../d8_r1_irlds/LRB423_d8_r1/Snap-535-Image Export-45.tif	5	TRUE	624.841
LRB423	irld-11 in N2	d8	r1	../d8_r1_irlds/LRB423_d8_r1/Snap-535-Image Export-45.tif	7	TRUE	503.174
LRB423	irld-11 in N2	d8	r1	../d8_r1_irlds/LRB423_d8_r1/Snap-535-Image Export-45.tif	9	TRUE	553.918
LRB423	irld-11 in N2	d8	r1	../d8_r1_irlds/LRB423_d8_r1/Snap-536-Image Export-46.tif	1	TRUE	487.471
LRB423	irld-11 in N2	d8	r1	../d8_r1_irlds/LRB423_d8_r1/Snap-536-Image Export-46.tif	2	TRUE	476.026
LRB423	irld-11 in N2	d8	r1	../d8_r1_irlds/LRB423_d8_r1/Snap-536-Image Export-46.tif	3	TRUE	576.746
LRB423	irld-11 in N2	d8	r1	../d8_r1_irlds/LRB423_d8_r1/Snap-537-Image Export-47.tif	0	TRUE	612.975
LRB423	irld-11 in N2	d8	r1	../d8_r1_irlds/LRB423_d8_r1/Snap-537-Image Export-47.tif	4	TRUE	501.869
LRB423	irld-11 in N2	d8	r1	../d8_r1_irlds/LRB423_d8_r1/Snap-537-Image Export-47.tif	5	TRUE	512.172
LRB423	irld-11 in N2	d8	r1	../d8_r1_irlds/LRB423_d8_r1/Snap-537-Image Export-47.tif	11	TRUE	573.348
LRB423	irld-11 in N2	d1	r2	../d1_r2_irlds/LRB423_d1_r2/Snap-105270-Image Export-87.tif	0	TRUE	794.208
LRB423	irld-11 in N2	d1	r2	../d1_r2_irlds/LRB423_d1_r2/Snap-105308-Image Export-125.tif	0	TRUE	765.265
LRB423	irld-11 in N2	d1	r2	../d1_r2_irlds/LRB423_d1_r2/Snap-105308-Image Export-125.tif	1	TRUE	722.449
LRB423	irld-11 in N2	d1	r2	../d1_r2_irlds/LRB423_d1_r2/Snap-105308-Image Export-125.tif	2	TRUE	800.904
LRB423	irld-11 in N2	d1	r2	../d1_r2_irlds/LRB423_d1_r2/Snap-105273-Image Export-90.tif	0	TRUE	813.981
LRB423	irld-11 in N2	d1	r2	../d1_r2_irlds/LRB423_d1_r2/Snap-105273-Image Export-90.tif	1	TRUE	704.546
LRB423	irld-11 in N2	d1	r2	../d1_r2_irlds/LRB423_d1_r2/Snap-105273-Image Export-90.tif	2	TRUE	798.981
LRB423	irld-11 in N2	d1	r2	../d1_r2_irlds/LRB423_d1_r2/Snap-105273-Image Export-90.tif	4	TRUE	781.614
LRB423	irld-11 in N2	d1	r2	../d1_r2_irlds/LRB423_d1_r2/Snap-105298-Image Export-115.tif	0	TRUE	772.459
LRB423	irld-11 in N2	d1	r2	../d1_r2_irlds/LRB423_d1_r2/Snap-105298-Image Export-115.tif	1	TRUE	734.323
LRB423	irld-11 in N2	d1	r2	../d1_r2_irlds/LRB423_d1_r2/Snap-105258-Image Export-75.tif	0	TRUE	781.3
LRB423	irld-11 in N2	d1	r2	../d1_r2_irlds/LRB423_d1_r2/Snap-105258-Image Export-75.tif	1	TRUE	789.252
LRB423	irld-11 in N2	d1	r2	../d1_r2_irlds/LRB423_d1_r2/Snap-105302-Image Export-119.tif	0	TRUE	739.058
LRB423	irld-11 in N2	d1	r2	../d1_r2_irlds/LRB423_d1_r2/Snap-105302-Image Export-119.tif	1	TRUE	758.884
LRB423	irld-11 in N2	d1	r2	../d1_r2_irlds/LRB423_d1_r2/Snap-105302-Image Export-119.tif	2	TRUE	709.096
LRB423	irld-11 in N2	d1	r2	../d1_r2_irlds/LRB423_d1_r2/Snap-105307-Image Export-124.tif	0	TRUE	815.368
LRB423	irld-11 in N2	d1	r2	../d1_r2_irlds/LRB423_d1_r2/Snap-105307-Image Export-124.tif	1	TRUE	796.836
LRB423	irld-11 in N2	d1	r2	../d1_r2_irlds/LRB423_d1_r2/Snap-105307-Image Export-124.tif	2	TRUE	758.884
LRB423	irld-11 in N2	d1	r2	../d1_r2_irlds/LRB423_d1_r2/Snap-105307-Image Export-124.tif	3	TRUE	779.025
LRB423	irld-11 in N2	d1	r2	../d1_r2_irlds/LRB423_d1_r2/Snap-105259-Image Export-76.tif	0	TRUE	753.299
LRB423	irld-11 in N2	d1	r2	../d1_r2_irlds/LRB423_d1_r2/Snap-105259-Image Export-76.tif	1	TRUE	821.305
LRB423	irld-11 in N2	d1	r2	../d1_r2_irlds/LRB423_d1_r2/Snap-105268-Image Export-85.tif	0	TRUE	746.159
LRB423	irld-11 in N2	d1	r2	../d1_r2_irlds/LRB423_d1_r2/Snap-105291-Image Export-108.tif	0	TRUE	775.271
LRB423	irld-11 in N2	d1	r2	../d1_r2_irlds/LRB423_d1_r2/Snap-105291-Image Export-108.tif	1	TRUE	757.812
LRB423	irld-11 in N2	d1	r2	../d1_r2_irlds/LRB423_d1_r2/Snap-105280-Image Export-97.tif	0	TRUE	681.686
LRB423	irld-11 in N2	d1	r2	../d1_r2_irlds/LRB423_d1_r2/Snap-105280-Image Export-97.tif	1	TRUE	769.648
LRB423	irld-11 in N2	d1	r2	../d1_r2_irlds/LRB423_d1_r2/Snap-105275-Image Export-92.tif	0	TRUE	796.169
LRB423	irld-11 in N2	d1	r2	../d1_r2_irlds/LRB423_d1_r2/Snap-105275-Image Export-92.tif	1	TRUE	720.932
LRB423	irld-11 in N2	d1	r2	../d1_r2_irlds/LRB423_d1_r2/Snap-105244-Image Export-61.tif	2	TRUE	819.788
LRB423	irld-11 in N2	d1	r2	../d1_r2_irlds/LRB423_d1_r2/Snap-105244-Image Export-61.tif	3	TRUE	765.135
LRB423	irld-11 in N2	d1	r2	../d1_r2_irlds/LRB423_d1_r2/Snap-105244-Image Export-61.tif	4	TRUE	747.676
LRB423	irld-11 in N2	d1	r2	../d1_r2_irlds/LRB423_d1_r2/Snap-105244-Image Export-61.tif	5	TRUE	755.981
LRB423	irld-11 in N2	d1	r2	../d1_r2_irlds/LRB423_d1_r2/Snap-105315-Image Export-132.tif	0	TRUE	791.029
LRB423	irld-11 in N2	d1	r2	../d1_r2_irlds/LRB423_d1_r2/Snap-105315-Image Export-132.tif	1	TRUE	766.3
LRB423	irld-11 in N2	d1	r2	../d1_r2_irlds/LRB423_d1_r2/Snap-105315-Image Export-132.tif	2	TRUE	745.271
LRB423	irld-11 in N2	d1	r2	../d1_r2_irlds/LRB423_d1_r2/Snap-105245-Image Export-62.tif	1	TRUE	752.725
LRB423	irld-11 in N2	d1	r2	../d1_r2_irlds/LRB423_d1_r2/Snap-105310-Image Export-127.tif	0	TRUE	764.285
LRB423	irld-11 in N2	d1	r2	../d1_r2_irlds/LRB423_d1_r2/Snap-105310-Image Export-127.tif	2	TRUE	778.082
LRB423	irld-11 in N2	d1	r2	../d1_r2_irlds/LRB423_d1_r2/Snap-105285-Image Export-102.tif	3	TRUE	707.893
LRB423	irld-11 in N2	d1	r2	../d1_r2_irlds/LRB423_d1_r2/Snap-105276-Image Export-93.tif	0	TRUE	785.59
LRB423	irld-11 in N2	d1	r2	../d1_r2_irlds/LRB423_d1_r2/Snap-105309-Image Export-126.tif	1	TRUE	742.183
LRB423	irld-11 in N2	d1	r2	../d1_r2_irlds/LRB423_d1_r2/Snap-105309-Image Export-126.tif	2	TRUE	679.096
LRB423	irld-11 in N2	d1	r2	../d1_r2_irlds/LRB423_d1_r2/Snap-105309-Image Export-126.tif	3	TRUE	713.923
LRB423	irld-11 in N2	d1	r2	../d1_r2_irlds/LRB423_d1_r2/Snap-105309-Image Export-126.tif	4	TRUE	774.198
LRB423	irld-11 in N2	d1	r2	../d1_r2_irlds/LRB423_d1_r2/Snap-105309-Image Export-126.tif	5	TRUE	775.899
LRB423	irld-11 in N2	d1	r2	../d1_r2_irlds/LRB423_d1_r2/Snap-105265-Image Export-82.tif	0	TRUE	777.86
LRB423	irld-11 in N2	d1	r2	../d1_r2_irlds/LRB423_d1_r2/Snap-105265-Image Export-82.tif	1	TRUE	789.512
LRB423	irld-11 in N2	d1	r2	../d1_r2_irlds/LRB423_d1_r2/Snap-105254-Image Export-71.tif	0	TRUE	774.198
LRB423	irld-11 in N2	d1	r2	../d1_r2_irlds/LRB423_d1_r2/Snap-105254-Image Export-71.tif	2	TRUE	778.526
LRB423	irld-11 in N2	d1	r2	../d1_r2_irlds/LRB423_d1_r2/Snap-105262-Image Export-79.tif	0	TRUE	779.285
LRB423	irld-11 in N2	d1	r2	../d1_r2_irlds/LRB423_d1_r2/Snap-105262-Image Export-79.tif	1	TRUE	801.218
LRB423	irld-11 in N2	d1	r2	../d1_r2_irlds/LRB423_d1_r2/Snap-105256-Image Export-73.tif	0	TRUE	760.715
LRB423	irld-11 in N2	d1	r2	../d1_r2_irlds/LRB423_d1_r2/Snap-105256-Image Export-73.tif	1	TRUE	814.609
LRB423	irld-11 in N2	d1	r2	../d1_r2_irlds/LRB423_d1_r2/Snap-105300-Image Export-117.tif	0	TRUE	746.604
LRB423	irld-11 in N2	d1	r2	../d1_r2_irlds/LRB423_d1_r2/Snap-105300-Image Export-117.tif	1	TRUE	776.657
LRB423	irld-11 in N2	d1	r2	../d1_r2_irlds/LRB423_d1_r2/Snap-105300-Image Export-117.tif	3	TRUE	730.884
LRB423	irld-11 in N2	d1	r2	../d1_r2_irlds/LRB423_d1_r2/Snap-105300-Image Export-117.tif	4	TRUE	695.835
LRB423	irld-11 in N2	d1	r2	../d1_r2_irlds/LRB423_d1_r2/Snap-105261-Image Export-78.tif	0	TRUE	801.034
LRB423	irld-11 in N2	d1	r2	../d1_r2_irlds/LRB423_d1_r2/Snap-105255-Image Export-72.tif	0	TRUE	771.517
LRB423	irld-11 in N2	d1	r2	../d1_r2_irlds/LRB423_d1_r2/Snap-105255-Image Export-72.tif	1	TRUE	762.324
LRB423	irld-11 in N2	d1	r2	../d1_r2_irlds/LRB423_d1_r2/Snap-105255-Image Export-72.tif	2	TRUE	794.561
LRB423	irld-11 in N2	d1	r2	../d1_r2_irlds/LRB423_d1_r2/Snap-105263-Image Export-80.tif	0	TRUE	762.232
LRB423	irld-11 in N2	d1	r2	../d1_r2_irlds/LRB423_d1_r2/Snap-105263-Image Export-80.tif	1	TRUE	769.426
LRB423	irld-11 in N2	d1	r2	../d1_r2_irlds/LRB423_d1_r2/Snap-105279-Image Export-96.tif	0	TRUE	756.165
LRB423	irld-11 in N2	d1	r2	../d1_r2_irlds/LRB423_d1_r2/Snap-105248-Image Export-65.tif	1	TRUE	779.599
LRB423	irld-11 in N2	d1	r2	../d1_r2_irlds/LRB423_d1_r2/Snap-105257-Image Export-74.tif	0	TRUE	760.715
LRB423	irld-11 in N2	d1	r2	../d1_r2_irlds/LRB423_d1_r2/Snap-105257-Image Export-74.tif	1	TRUE	814.609
LRB423	irld-11 in N2	d1	r2	../d1_r2_irlds/LRB423_d1_r2/Snap-105306-Image Export-123.tif	0	TRUE	766.966
LRB423	irld-11 in N2	d1	r2	../d1_r2_irlds/LRB423_d1_r2/Snap-105306-Image Export-123.tif	1	TRUE	725.667
LRB423	irld-11 in N2	d1	r2	../d1_r2_irlds/LRB423_d1_r2/Snap-105306-Image Export-123.tif	2	TRUE	641.183
LRB423	irld-11 in N2	d1	r2	../d1_r2_irlds/LRB423_d1_r2/Snap-105267-Image Export-84.tif	0	TRUE	753.261
LRB423	irld-11 in N2	d1	r2	../d1_r2_irlds/LRB423_d1_r2/Snap-105250-Image Export-67.tif	0	TRUE	802.865
LRB423	irld-11 in N2	d1	r2	../d1_r2_irlds/LRB423_d1_r2/Snap-105312-Image Export-129.tif	0	TRUE	774.604
LRB423	irld-11 in N2	d1	r2	../d1_r2_irlds/LRB423_d1_r2/Snap-105312-Image Export-129.tif	2	TRUE	753.835
LRB423	irld-11 in N2	d1	r2	../d1_r2_irlds/LRB423_d1_r2/Snap-105312-Image Export-129.tif	3	TRUE	764.285
LRB423	irld-11 in N2	d1	r2	../d1_r2_irlds/LRB423_d1_r2/Snap-105303-Image Export-120.tif	0	TRUE	691.729
LRB423	irld-11 in N2	d1	r2	../d1_r2_irlds/LRB423_d1_r2/Snap-105303-Image Export-120.tif	2	TRUE	700.348
LRB423	irld-11 in N2	d1	r2	../d1_r2_irlds/LRB423_d1_r2/Snap-105284-Image Export-101.tif	0	TRUE	675.25
LRB423	irld-11 in N2	d1	r2	../d1_r2_irlds/LRB423_d1_r2/Snap-105249-Image Export-66.tif	0	TRUE	792.73
LRB423	irld-11 in N2	d1	r2	../d1_r2_irlds/LRB423_d1_r2/Snap-105249-Image Export-66.tif	1	TRUE	779.691
LRB423	irld-11 in N2	d1	r2	../d1_r2_irlds/LRB423_d1_r2/Snap-105278-Image Export-95.tif	0	TRUE	764.285
LRB423	irld-11 in N2	d1	r2	../d1_r2_irlds/LRB423_d1_r2/Snap-105278-Image Export-95.tif	1	TRUE	763.082
LRB423	irld-11 in N2	d1	r2	../d1_r2_irlds/LRB423_d1_r2/Snap-105278-Image Export-95.tif	2	TRUE	844.165
LRB423	irld-11 in N2	d1	r2	../d1_r2_irlds/LRB423_d1_r2/Snap-105311-Image Export-128.tif	0	TRUE	759.512
LRB423	irld-11 in N2	d1	r2	../d1_r2_irlds/LRB423_d1_r2/Snap-105311-Image Export-128.tif	1	TRUE	784.832
LRB423	irld-11 in N2	d1	r2	../d1_r2_irlds/LRB423_d1_r2/Snap-105311-Image Export-128.tif	2	TRUE	720.71
LRB423	irld-11 in N2	d1	r2	../d1_r2_irlds/LRB423_d1_r2/Snap-105311-Image Export-128.tif	3	TRUE	746.159
LRB423	irld-11 in N2	d1	r2	../d1_r2_irlds/LRB423_d1_r2/Snap-105295-Image Export-112.tif	0	TRUE	764.507
LRB423	irld-11 in N2	d1	r2	../d1_r2_irlds/LRB423_d1_r2/Snap-105295-Image Export-112.tif	1	TRUE	766.614
LRB423	irld-11 in N2	d1	r2	../d1_r2_irlds/LRB423_d1_r2/Snap-105305-Image Export-122.tif	0	TRUE	792.416
LRB423	irld-11 in N2	d1	r2	../d1_r2_irlds/LRB423_d1_r2/Snap-105305-Image Export-122.tif	1	TRUE	769.426
LRB423	irld-11 in N2	d1	r2	../d1_r2_irlds/LRB423_d1_r2/Snap-105305-Image Export-122.tif	3	TRUE	769.019
LRB423	irld-11 in N2	d1	r2	../d1_r2_irlds/LRB423_d1_r2/Snap-105288-Image Export-105.tif	1	TRUE	784.241
LRB423	irld-11 in N2	d1	r2	../d1_r2_irlds/LRB423_d1_r2/Snap-105288-Image Export-105.tif	2	TRUE	793.748
LRB423	irld-11 in N2	d1	r2	../d1_r2_irlds/LRB423_d1_r2/Snap-105288-Image Export-105.tif	3	TRUE	767.947
LRB423	irld-11 in N2	d1	r2	../d1_r2_irlds/LRB423_d1_r2/Snap-105288-Image Export-105.tif	4	TRUE	767.411
LRB423	irld-11 in N2	d1	r2	../d1_r2_irlds/LRB423_d1_r2/Snap-105318-Image Export-135.tif	1	TRUE	798.223
LRB423	irld-11 in N2	d1	r2	../d1_r2_irlds/LRB423_d1_r2/Snap-105318-Image Export-135.tif	2	TRUE	774.604
LRB423	irld-11 in N2	d1	r2	../d1_r2_irlds/LRB423_d1_r2/Snap-105287-Image Export-104.tif	1	TRUE	775.493
LRB423	irld-11 in N2	d1	r2	../d1_r2_irlds/LRB423_d1_r2/Snap-105287-Image Export-104.tif	2	TRUE	760.179
LRB423	irld-11 in N2	d1	r2	../d1_r2_irlds/LRB423_d1_r2/Snap-105287-Image Export-104.tif	3	TRUE	760.715
LRB423	irld-11 in N2	d1	r2	../d1_r2_irlds/LRB423_d1_r2/Snap-105287-Image Export-104.tif	4	TRUE	791.213
LRB423	irld-11 in N2	d1	r2	../d1_r2_irlds/LRB423_d1_r2/Snap-105287-Image Export-104.tif	5	TRUE	788.624
LRB423	irld-11 in N2	d1	r2	../d1_r2_irlds/LRB423_d1_r2/Snap-105260-Image Export-77.tif	0	TRUE	829.793
LRB423	irld-11 in N2	d1	r2	../d1_r2_irlds/LRB423_d1_r2/Snap-105260-Image Export-77.tif	1	TRUE	773.218
LRB423	irld-11 in N2	d1	r2	../d1_r2_irlds/LRB423_d1_r2/Snap-105317-Image Export-134.tif	0	TRUE	767.725
LRB423	irld-11 in N2	d1	r2	../d1_r2_irlds/LRB423_d1_r2/Snap-105317-Image Export-134.tif	1	TRUE	748.565
LRB423	irld-11 in N2	d1	r2	../d1_r2_irlds/LRB423_d1_r2/Snap-105316-Image Export-133.tif	0	TRUE	786.386
LRB423	irld-11 in N2	d1	r2	../d1_r2_irlds/LRB423_d1_r2/Snap-105316-Image Export-133.tif	1	TRUE	764.599
LRB423	irld-11 in N2	d1	r2	../d1_r2_irlds/LRB423_d1_r2/Snap-105316-Image Export-133.tif	2	TRUE	808.228
LRB423	irld-11 in N2	d1	r2	../d1_r2_irlds/LRB423_d1_r2/Snap-105286-Image Export-103.tif	0	TRUE	797.502
LRB423	irld-11 in N2	d1	r2	../d1_r2_irlds/LRB423_d1_r2/Snap-105286-Image Export-103.tif	1	TRUE	540.588
LRB423	irld-11 in N2	d1	r2	../d1_r2_irlds/LRB423_d1_r2/Snap-105286-Image Export-103.tif	2	TRUE	743.754
LRB423	irld-11 in N2	d1	r2	../d1_r2_irlds/LRB423_d1_r2/Snap-105286-Image Export-103.tif	3	TRUE	792.952
LRB423	irld-11 in N2	d1	r2	../d1_r2_irlds/LRB423_d1_r2/Snap-105286-Image Export-103.tif	4	TRUE	773.218
LRB423	irld-11 in N2	d1	r2	../d1_r2_irlds/LRB423_d1_r2/Snap-105281-Image Export-98.tif	0	TRUE	743.256
LRB423	irld-11 in N2	d1	r2	../d1_r2_irlds/LRB423_d1_r2/Snap-105281-Image Export-98.tif	1	TRUE	758.348
LRB423	irld-11 in N2	d1	r2	../d1_r2_irlds/LRB423_d1_r2/Snap-105292-Image Export-109.tif	1	TRUE	746.29
LRB423	irld-11 in N2	d1	r2	../d1_r2_irlds/LRB423_d1_r2/Snap-105283-Image Export-100.tif	0	TRUE	738.874
LRB423	irld-11 in N2	d1	r2	../d1_r2_irlds/LRB423_d1_r2/Snap-105313-Image Export-130.tif	1	TRUE	878.232
LRB423	irld-11 in N2	d1	r2	../d1_r2_irlds/LRB423_d1_r2/Snap-105313-Image Export-130.tif	2	TRUE	808.542
LRB423	irld-11 in N2	d1	r2	../d1_r2_irlds/LRB423_d1_r2/Snap-105313-Image Export-130.tif	3	TRUE	807.914
LRB423	irld-11 in N2	d1	r2	../d1_r2_irlds/LRB423_d1_r2/Snap-105304-Image Export-121.tif	0	TRUE	791.343
LRB423	irld-11 in N2	d1	r2	../d1_r2_irlds/LRB423_d1_r2/Snap-105304-Image Export-121.tif	1	TRUE	641.367
LRB423	irld-11 in N2	d1	r2	../d1_r2_irlds/LRB423_d1_r2/Snap-105301-Image Export-118.tif	0	TRUE	739.464
LRB423	irld-11 in N2	d1	r2	../d1_r2_irlds/LRB423_d1_r2/Snap-105301-Image Export-118.tif	1	TRUE	784.962
LRB423	irld-11 in N2	d1	r2	../d1_r2_irlds/LRB423_d1_r2/Snap-105301-Image Export-118.tif	2	TRUE	777.638
LRB423	irld-11 in N2	d1	r2	../d1_r2_irlds/LRB423_d1_r2/Snap-105301-Image Export-118.tif	3	TRUE	721.691
LRB423	irld-11 in N2	d1	r2	../d1_r2_irlds/LRB423_d1_r2/Snap-105272-Image Export-89.tif	0	TRUE	712.222
LRB423	irld-11 in N2	d1	r2	../d1_r2_irlds/LRB423_d1_r2/Snap-105272-Image Export-89.tif	1	TRUE	773.884
LRB423	irld-11 in N2	d8	r2	../d8_r2_irlds/LRB423_d8_r2/Snap-173-Image Export-64.tif	1	TRUE	473.396
LRB423	irld-11 in N2	d8	r2	../d8_r2_irlds/LRB423_d8_r2/Snap-182-Image Export-73.tif	0	TRUE	457.39
LRB423	irld-11 in N2	d8	r2	../d8_r2_irlds/LRB423_d8_r2/Snap-180-Image Export-71.tif	0	TRUE	454.167
LRB423	irld-11 in N2	d8	r2	../d8_r2_irlds/LRB423_d8_r2/Snap-186-Image Export-77.tif	0	TRUE	456.021
LRB423	irld-11 in N2	d8	r2	../d8_r2_irlds/LRB423_d8_r2/Snap-181-Image Export-72.tif	0	TRUE	494.661
LRB423	irld-11 in N2	d8	r2	../d8_r2_irlds/LRB423_d8_r2/Snap-184-Image Export-75.tif	0	TRUE	412.776
LRB423	irld-11 in N2	d8	r2	../d8_r2_irlds/LRB423_d8_r2/Snap-184-Image Export-75.tif	1	TRUE	302.993
LRB423	irld-11 in N2	d8	r2	../d8_r2_irlds/LRB423_d8_r2/Snap-183-Image Export-74.tif	1	TRUE	474.656
LRB423	irld-11 in N2	d8	r2	../d8_r2_irlds/LRB423_d8_r2/Snap-207-Image Export-98.tif	0	TRUE	478.803
LRB423	irld-11 in N2	d8	r2	../d8_r2_irlds/LRB423_d8_r2/Snap-172-Image Export-63.tif	1	TRUE	491.418
LRB423	irld-11 in N2	d8	r2	../d8_r2_irlds/LRB423_d8_r2/Snap-172-Image Export-63.tif	2	TRUE	543.551
LRB423	irld-11 in N2	d8	r2	../d8_r2_irlds/LRB423_d8_r2/Snap-172-Image Export-63.tif	3	TRUE	579.743
LRB423	irld-11 in N2	d8	r2	../d8_r2_irlds/LRB423_d8_r2/Snap-172-Image Export-63.tif	6	TRUE	196.828
LRB423	irld-11 in N2	d8	r2	../d8_r2_irlds/LRB423_d8_r2/Snap-198-Image Export-89.tif	0	TRUE	432.334
LRB423	irld-11 in N2	d8	r2	../d8_r2_irlds/LRB423_d8_r2/Snap-198-Image Export-89.tif	1	TRUE	509.24
LRB423	irld-11 in N2	d8	r2	../d8_r2_irlds/LRB423_d8_r2/Snap-159-Image Export-50.tif	0	TRUE	514.73
LRB423	irld-11 in N2	d8	r2	../d8_r2_irlds/LRB423_d8_r2/Snap-170-Image Export-61.tif	0	TRUE	434.983
LRB423	irld-11 in N2	d8	r2	../d8_r2_irlds/LRB423_d8_r2/Snap-176-Image Export-67.tif	0	TRUE	520.239
LRB423	irld-11 in N2	d8	r2	../d8_r2_irlds/LRB423_d8_r2/Snap-171-Image Export-62.tif	0	TRUE	335.632
LRB423	irld-11 in N2	d8	r2	../d8_r2_irlds/LRB423_d8_r2/Snap-213-Image Export-104.tif	0	TRUE	562.606
LRB423	irld-11 in N2	d8	r2	../d8_r2_irlds/LRB423_d8_r2/Snap-213-Image Export-104.tif	1	TRUE	490.778
LRB423	irld-11 in N2	d8	r2	../d8_r2_irlds/LRB423_d8_r2/Snap-208-Image Export-99.tif	0	TRUE	456.861
LRB423	irld-11 in N2	d8	r2	../d8_r2_irlds/LRB423_d8_r2/Snap-212-Image Export-103.tif	0	TRUE	532.305
LRB423	irld-11 in N2	d8	r2	../d8_r2_irlds/LRB423_d8_r2/Snap-197-Image Export-88.tif	0	TRUE	443.496
LRB423	irld-11 in N2	d8	r2	../d8_r2_irlds/LRB423_d8_r2/Snap-179-Image Export-70.tif	0	TRUE	517.132
LRB423	irld-11 in N2	d8	r2	../d8_r2_irlds/LRB423_d8_r2/Snap-167-Image Export-58.tif	3	TRUE	454.806
LRB423	irld-11 in N2	d8	r2	../d8_r2_irlds/LRB423_d8_r2/Snap-167-Image Export-58.tif	4	TRUE	476.665
LRB423	irld-11 in N2	d8	r2	../d8_r2_irlds/LRB423_d8_r2/Snap-167-Image Export-58.tif	5	TRUE	488.924
LRB423	irld-11 in N2	d8	r2	../d8_r2_irlds/LRB423_d8_r2/Snap-209-Image Export-100.tif	0	TRUE	555.243
LRB423	irld-11 in N2	d8	r2	../d8_r2_irlds/LRB423_d8_r2/Snap-162-Image Export-53.tif	0	TRUE	476.884
LRB423	irld-11 in N2	d8	r2	../d8_r2_irlds/LRB423_d8_r2/Snap-165-Image Export-56.tif	0	TRUE	479.268
LRB423	irld-11 in N2	d8	r2	../d8_r2_irlds/LRB423_d8_r2/Snap-165-Image Export-56.tif	1	TRUE	348.312
LRB423	irld-11 in N2	d8	r2	../d8_r2_irlds/LRB423_d8_r2/Snap-161-Image Export-52.tif	0	TRUE	525.18
LRB423	irld-11 in N2	d8	r2	../d8_r2_irlds/LRB423_d8_r2/Snap-161-Image Export-52.tif	1	TRUE	367.586
LRB423	irld-11 in N2	d8	r2	../d8_r2_irlds/LRB423_d8_r2/Snap-214-Image Export-105.tif	0	TRUE	456.641
LRB423	irld-11 in N2	d8	r2	../d8_r2_irlds/LRB423_d8_r2/Snap-164-Image Export-55.tif	0	TRUE	516.448
LRB423	irld-11 in N2	d8	r2	../d8_r2_irlds/LRB423_d8_r2/Snap-188-Image Export-79.tif	0	TRUE	486.805
LRB423	irld-11 in N2	d8	r2	../d8_r2_irlds/LRB423_d8_r2/Snap-196-Image Export-87.tif	0	TRUE	450.11
LRB423	irld-11 in N2	d8	r2	../d8_r2_irlds/LRB423_d8_r2/Snap-196-Image Export-87.tif	1	TRUE	534.05
LRB423	irld-11 in N2	d8	r2	../d8_r2_irlds/LRB423_d8_r2/Snap-163-Image Export-54.tif	0	TRUE	280.851
LRB423	irld-11 in N2	d8	r2	../d8_r2_irlds/LRB423_d8_r2/Snap-163-Image Export-54.tif	1	TRUE	333.824
LRB423	irld-11 in N2	d8	r2	../d8_r2_irlds/LRB423_d8_r2/Snap-163-Image Export-54.tif	4	TRUE	475.25
LRB423	irld-11 in N2	d8	r2	../d8_r2_irlds/LRB423_d8_r2/Snap-194-Image Export-85.tif	0	TRUE	391.647
LRB423	irld-11 in N2	d8	r2	../d8_r2_irlds/LRB423_d8_r2/Snap-211-Image Export-102.tif	0	TRUE	584.419
LRB423	irld-11 in N2	d8	r2	../d8_r2_irlds/LRB423_d8_r2/Snap-211-Image Export-102.tif	1	TRUE	482.639
LRB423	irld-11 in N2	d8	r2	../d8_r2_irlds/LRB423_d8_r2/Snap-189-Image Export-80.tif	0	TRUE	513.076
LRB423	irld-11 in N2	d8	r2	../d8_r2_irlds/LRB423_d8_r2/Snap-189-Image Export-80.tif	1	TRUE	508.892
LRB423	irld-11 in N2	d8	r2	../d8_r2_irlds/LRB423_d8_r2/Snap-192-Image Export-83.tif	0	TRUE	488.906
LRB423	irld-11 in N2	d8	r2	../d8_r2_irlds/LRB423_d8_r2/Snap-195-Image Export-86.tif	0	TRUE	483.635
LRB423	irld-11 in N2	d8	r2	../d8_r2_irlds/LRB423_d8_r2/Snap-195-Image Export-86.tif	1	TRUE	506.326
LRB423	irld-11 in N2	d8	r2	../d8_r2_irlds/LRB423_d8_r2/Snap-190-Image Export-81.tif	0	TRUE	562.825
LRB423	irld-11 in N2	d8	r2	../d8_r2_irlds/LRB423_d8_r2/Snap-178-Image Export-69.tif	0	TRUE	469.65
LRB423	irld-11 in N2	d8	r2	../d8_r2_irlds/LRB423_d8_r2/Snap-204-Image Export-95.tif	0	TRUE	465
LRB423	irld-11 in N2	d8	r2	../d8_r2_irlds/LRB423_d8_r2/Snap-206-Image Export-97.tif	0	TRUE	473.596
LRB423	irld-11 in N2	d8	r2	../d8_r2_irlds/LRB423_d8_r2/Snap-201-Image Export-92.tif	0	TRUE	482.265
LRB423	irld-11 in N2	d8	r2	../d8_r2_irlds/LRB423_d8_r2/Snap-201-Image Export-92.tif	1	TRUE	511.487
LRB423	irld-11 in N2	d8	r2	../d8_r2_irlds/LRB423_d8_r2/Snap-201-Image Export-92.tif	2	TRUE	569.065
LRB423	irld-11 in N2	d8	r2	../d8_r2_irlds/LRB423_d8_r2/Snap-199-Image Export-90.tif	0	TRUE	496.689
LRB423	irld-11 in N2	d8	r2	../d8_r2_irlds/LRB423_d8_r2/Snap-205-Image Export-96.tif	0	TRUE	494.441
LRB423	irld-11 in N2	d8	r2	../d8_r2_irlds/LRB423_d8_r2/Snap-210-Image Export-101.tif	0	TRUE	462.725
LRB423	irld-11 in N2	d8	r2	../d8_r2_irlds/LRB423_d8_r2/Snap-210-Image Export-101.tif	1	TRUE	505.157
LRB423	irld-11 in N2	d8	r2	../d8_r2_irlds/LRB423_d8_r2/Snap-187-Image Export-78.tif	0	TRUE	502.553
LRB423	irld-11 in N2	d8	r2	../d8_r2_irlds/LRB423_d8_r2/Snap-187-Image Export-78.tif	1	TRUE	484.978
LRB423	irld-11 in N2	d1	r3	../d1_r3_irlds/LRB423_d1_r3/Snap-49-Image Export-49.tif	2	TRUE	672.975
LRB423	irld-11 in N2	d1	r3	../d1_r3_irlds/LRB423_d1_r3/Snap-49-Image Export-49.tif	3	TRUE	678.246
LRB423	irld-11 in N2	d1	r3	../d1_r3_irlds/LRB423_d1_r3/Snap-49-Image Export-49.tif	4	TRUE	697.758
LRB423	irld-11 in N2	d1	r3	../d1_r3_irlds/LRB423_d1_r3/Snap-49-Image Export-49.tif	5	TRUE	732.362
LRB423	irld-11 in N2	d1	r3	../d1_r3_irlds/LRB423_d1_r3/Snap-22-Image Export-22.tif	1	TRUE	714.275
LRB423	irld-11 in N2	d1	r3	../d1_r3_irlds/LRB423_d1_r3/Snap-22-Image Export-22.tif	2	TRUE	720.618
LRB423	irld-11 in N2	d1	r3	../d1_r3_irlds/LRB423_d1_r3/Snap-10-Image Export-10.tif	1	TRUE	710.261
LRB423	irld-11 in N2	d1	r3	../d1_r3_irlds/LRB423_d1_r3/Snap-10-Image Export-10.tif	2	TRUE	695.261
LRB423	irld-11 in N2	d1	r3	../d1_r3_irlds/LRB423_d1_r3/Snap-23-Image Export-23.tif	0	TRUE	735.618
LRB423	irld-11 in N2	d1	r3	../d1_r3_irlds/LRB423_d1_r3/Snap-23-Image Export-23.tif	1	TRUE	753.169
LRB423	irld-11 in N2	d1	r3	../d1_r3_irlds/LRB423_d1_r3/Snap-23-Image Export-23.tif	2	TRUE	742.053
LRB423	irld-11 in N2	d1	r3	../d1_r3_irlds/LRB423_d1_r3/Snap-23-Image Export-23.tif	4	TRUE	703.473
LRB423	irld-11 in N2	d1	r3	../d1_r3_irlds/LRB423_d1_r3/Snap-12-Image Export-12.tif	1	TRUE	844.349
LRB423	irld-11 in N2	d1	r3	../d1_r3_irlds/LRB423_d1_r3/Snap-12-Image Export-12.tif	2	TRUE	747.676
LRB423	irld-11 in N2	d1	r3	../d1_r3_irlds/LRB423_d1_r3/Snap-12-Image Export-12.tif	4	TRUE	757.904
LRB423	irld-11 in N2	d1	r3	../d1_r3_irlds/LRB423_d1_r3/Snap-13-Image Export-13.tif	0	TRUE	733.879
LRB423	irld-11 in N2	d1	r3	../d1_r3_irlds/LRB423_d1_r3/Snap-13-Image Export-13.tif	1	TRUE	721.154
LRB423	irld-11 in N2	d1	r3	../d1_r3_irlds/LRB423_d1_r3/Snap-21-Image Export-21.tif	0	TRUE	777.102
LRB423	irld-11 in N2	d1	r3	../d1_r3_irlds/LRB423_d1_r3/Snap-21-Image Export-21.tif	1	TRUE	708.208
LRB423	irld-11 in N2	d1	r3	../d1_r3_irlds/LRB423_d1_r3/Snap-21-Image Export-21.tif	2	TRUE	759.198
LRB423	irld-11 in N2	d1	r3	../d1_r3_irlds/LRB423_d1_r3/Snap-14-Image Export-14.tif	1	TRUE	723.56
LRB423	irld-11 in N2	d1	r3	../d1_r3_irlds/LRB423_d1_r3/Snap-26-Image Export-26.tif	1	TRUE	737.671
LRB423	irld-11 in N2	d1	r3	../d1_r3_irlds/LRB423_d1_r3/Snap-26-Image Export-26.tif	2	TRUE	697.444
LRB423	irld-11 in N2	d1	r3	../d1_r3_irlds/LRB423_d1_r3/Snap-26-Image Export-26.tif	3	TRUE	755.092
LRB423	irld-11 in N2	d1	r3	../d1_r3_irlds/LRB423_d1_r3/Snap-26-Image Export-26.tif	4	TRUE	755.758
LRB423	irld-11 in N2	d1	r3	../d1_r3_irlds/LRB423_d1_r3/Snap-26-Image Export-26.tif	5	TRUE	743.57
LRB423	irld-11 in N2	d1	r3	../d1_r3_irlds/LRB423_d1_r3/Snap-26-Image Export-26.tif	8	TRUE	691.507
LRB423	irld-11 in N2	d1	r3	../d1_r3_irlds/LRB423_d1_r3/Snap-26-Image Export-26.tif	9	TRUE	733.565
LRB423	irld-11 in N2	d1	r3	../d1_r3_irlds/LRB423_d1_r3/Snap-26-Image Export-26.tif	10	TRUE	757.053
LRB423	irld-11 in N2	d1	r3	../d1_r3_irlds/LRB423_d1_r3/Snap-27-Image Export-27.tif	1	TRUE	756.295
LRB423	irld-11 in N2	d1	r3	../d1_r3_irlds/LRB423_d1_r3/Snap-27-Image Export-27.tif	3	TRUE	683.333
LRB423	irld-11 in N2	d1	r3	../d1_r3_irlds/LRB423_d1_r3/Snap-27-Image Export-27.tif	4	TRUE	722.541
LRB423	irld-11 in N2	d1	r3	../d1_r3_irlds/LRB423_d1_r3/Snap-15-Image Export-15.tif	0	TRUE	705.84
LRB423	irld-11 in N2	d1	r3	../d1_r3_irlds/LRB423_d1_r3/Snap-15-Image Export-15.tif	1	TRUE	694.763
LRB423	irld-11 in N2	d1	r3	../d1_r3_irlds/LRB423_d1_r3/Snap-24-Image Export-24.tif	0	TRUE	811.261
LRB423	irld-11 in N2	d1	r3	../d1_r3_irlds/LRB423_d1_r3/Snap-24-Image Export-24.tif	1	TRUE	703.787
LRB423	irld-11 in N2	d1	r3	../d1_r3_irlds/LRB423_d1_r3/Snap-24-Image Export-24.tif	2	TRUE	701.42
LRB423	irld-11 in N2	d1	r3	../d1_r3_irlds/LRB423_d1_r3/Snap-24-Image Export-24.tif	3	TRUE	724.188
LRB423	irld-11 in N2	d1	r3	../d1_r3_irlds/LRB423_d1_r3/Snap-25-Image Export-25.tif	2	TRUE	687.975
LRB423	irld-11 in N2	d1	r3	../d1_r3_irlds/LRB423_d1_r3/Snap-25-Image Export-25.tif	3	TRUE	704.101
LRB423	irld-11 in N2	d1	r3	../d1_r3_irlds/LRB423_d1_r3/Snap-25-Image Export-25.tif	5	TRUE	724.816
LRB423	irld-11 in N2	d1	r3	../d1_r3_irlds/LRB423_d1_r3/Snap-25-Image Export-25.tif	7	TRUE	797.778
LRB423	irld-11 in N2	d1	r3	../d1_r3_irlds/LRB423_d1_r3/Snap-25-Image Export-25.tif	9	TRUE	752.005
LRB423	irld-11 in N2	d1	r3	../d1_r3_irlds/LRB423_d1_r3/Snap-17-Image Export-17.tif	0	TRUE	735.71
LRB423	irld-11 in N2	d1	r3	../d1_r3_irlds/LRB423_d1_r3/Snap-17-Image Export-17.tif	1	TRUE	698.869
LRB423	irld-11 in N2	d1	r3	../d1_r3_irlds/LRB423_d1_r3/Snap-17-Image Export-17.tif	2	TRUE	809.561
LRB423	irld-11 in N2	d1	r3	../d1_r3_irlds/LRB423_d1_r3/Snap-17-Image Export-17.tif	3	TRUE	747.01
LRB423	irld-11 in N2	d1	r3	../d1_r3_irlds/LRB423_d1_r3/Snap-30-Image Export-30.tif	1	TRUE	680.835
LRB423	irld-11 in N2	d1	r3	../d1_r3_irlds/LRB423_d1_r3/Snap-30-Image Export-30.tif	7	TRUE	750.894
LRB423	irld-11 in N2	d1	r3	../d1_r3_irlds/LRB423_d1_r3/Snap-30-Image Export-30.tif	9	TRUE	729.237
LRB423	irld-11 in N2	d1	r3	../d1_r3_irlds/LRB423_d1_r3/Snap-30-Image Export-30.tif	10	TRUE	745.179
LRB423	irld-11 in N2	d1	r3	../d1_r3_irlds/LRB423_d1_r3/Snap-02-Image Export-02.tif	4	TRUE	685.922
LRB423	irld-11 in N2	d1	r3	../d1_r3_irlds/LRB423_d1_r3/Snap-02-Image Export-02.tif	6	TRUE	739.15
LRB423	irld-11 in N2	d1	r3	../d1_r3_irlds/LRB423_d1_r3/Snap-02-Image Export-02.tif	7	TRUE	741.647
LRB423	irld-11 in N2	d1	r3	../d1_r3_irlds/LRB423_d1_r3/Snap-02-Image Export-02.tif	8	TRUE	718.251
LRB423	irld-11 in N2	d1	r3	../d1_r3_irlds/LRB423_d1_r3/Snap-03-Image Export-03.tif	2	TRUE	755.314
LRB423	irld-11 in N2	d1	r3	../d1_r3_irlds/LRB423_d1_r3/Snap-03-Image Export-03.tif	3	TRUE	640.961
LRB423	irld-11 in N2	d1	r3	../d1_r3_irlds/LRB423_d1_r3/Snap-31-Image Export-31.tif	0	TRUE	734.507
LRB423	irld-11 in N2	d1	r3	../d1_r3_irlds/LRB423_d1_r3/Snap-01-Image Export-01.tif	0	TRUE	756.295
LRB423	irld-11 in N2	d1	r3	../d1_r3_irlds/LRB423_d1_r3/Snap-01-Image Export-01.tif	1	TRUE	768.483
LRB423	irld-11 in N2	d1	r3	../d1_r3_irlds/LRB423_d1_r3/Snap-01-Image Export-01.tif	4	TRUE	785.255
LRB423	irld-11 in N2	d1	r3	../d1_r3_irlds/LRB423_d1_r3/Snap-33-Image Export-33.tif	0	TRUE	685.7
LRB423	irld-11 in N2	d1	r3	../d1_r3_irlds/LRB423_d1_r3/Snap-33-Image Export-33.tif	1	TRUE	676.415
LRB423	irld-11 in N2	d1	r3	../d1_r3_irlds/LRB423_d1_r3/Snap-06-Image Export-06.tif	1	TRUE	735.488
LRB423	irld-11 in N2	d1	r3	../d1_r3_irlds/LRB423_d1_r3/Snap-06-Image Export-06.tif	2	TRUE	692.265
LRB423	irld-11 in N2	d1	r3	../d1_r3_irlds/LRB423_d1_r3/Snap-06-Image Export-06.tif	3	TRUE	683.869
LRB423	irld-11 in N2	d1	r3	../d1_r3_irlds/LRB423_d1_r3/Snap-06-Image Export-06.tif	4	TRUE	705.082
LRB423	irld-11 in N2	d1	r3	../d1_r3_irlds/LRB423_d1_r3/Snap-06-Image Export-06.tif	5	TRUE	741.647
LRB423	irld-11 in N2	d1	r3	../d1_r3_irlds/LRB423_d1_r3/Snap-06-Image Export-06.tif	6	TRUE	726.111
LRB423	irld-11 in N2	d1	r3	../d1_r3_irlds/LRB423_d1_r3/Snap-34-Image Export-34.tif	2	TRUE	714.681
LRB423	irld-11 in N2	d1	r3	../d1_r3_irlds/LRB423_d1_r3/Snap-35-Image Export-35.tif	3	TRUE	743.034
LRB423	irld-11 in N2	d1	r3	../d1_r3_irlds/LRB423_d1_r3/Snap-35-Image Export-35.tif	5	TRUE	795.097
LRB423	irld-11 in N2	d1	r3	../d1_r3_irlds/LRB423_d1_r3/Snap-35-Image Export-35.tif	6	TRUE	736.56
LRB423	irld-11 in N2	d1	r3	../d1_r3_irlds/LRB423_d1_r3/Snap-04-Image Export-04.tif	0	TRUE	728.478
LRB423	irld-11 in N2	d1	r3	../d1_r3_irlds/LRB423_d1_r3/Snap-04-Image Export-04.tif	2	TRUE	768.613
LRB423	irld-11 in N2	d1	r3	../d1_r3_irlds/LRB423_d1_r3/Snap-04-Image Export-04.tif	4	TRUE	707.932
LRB423	irld-11 in N2	d1	r3	../d1_r3_irlds/LRB423_d1_r3/Snap-37-Image Export-37.tif	1	TRUE	740.444
LRB423	irld-11 in N2	d1	r3	../d1_r3_irlds/LRB423_d1_r3/Snap-37-Image Export-37.tif	2	TRUE	731.382
LRB423	irld-11 in N2	d1	r3	../d1_r3_irlds/LRB423_d1_r3/Snap-37-Image Export-37.tif	3	TRUE	711.777
LRB423	irld-11 in N2	d1	r3	../d1_r3_irlds/LRB423_d1_r3/Snap-05-Image Export-05.tif	0	TRUE	717.531
LRB423	irld-11 in N2	d1	r3	../d1_r3_irlds/LRB423_d1_r3/Snap-05-Image Export-05.tif	1	TRUE	710.575
LRB423	irld-11 in N2	d1	r3	../d1_r3_irlds/LRB423_d1_r3/Snap-59-Image Export-59.tif	0	TRUE	690.304
LRB423	irld-11 in N2	d1	r3	../d1_r3_irlds/LRB423_d1_r3/Snap-59-Image Export-59.tif	1	TRUE	729.773
LRB423	irld-11 in N2	d1	r3	../d1_r3_irlds/LRB423_d1_r3/Snap-58-Image Export-58.tif	1	TRUE	811.89
LRB423	irld-11 in N2	d1	r3	../d1_r3_irlds/LRB423_d1_r3/Snap-58-Image Export-58.tif	2	TRUE	733.749
LRB423	irld-11 in N2	d1	r3	../d1_r3_irlds/LRB423_d1_r3/Snap-58-Image Export-58.tif	3	TRUE	734.952
LRB423	irld-11 in N2	d1	r3	../d1_r3_irlds/LRB423_d1_r3/Snap-42-Image Export-42.tif	5	TRUE	717.492
LRB423	irld-11 in N2	d1	r3	../d1_r3_irlds/LRB423_d1_r3/Snap-42-Image Export-42.tif	8	TRUE	697.314
LRB423	irld-11 in N2	d1	r3	../d1_r3_irlds/LRB423_d1_r3/Snap-43-Image Export-43.tif	0	TRUE	752.058
LRB423	irld-11 in N2	d1	r3	../d1_r3_irlds/LRB423_d1_r3/Snap-43-Image Export-43.tif	1	TRUE	715.439
LRB423	irld-11 in N2	d1	r3	../d1_r3_irlds/LRB423_d1_r3/Snap-43-Image Export-43.tif	2	TRUE	721.507
LRB423	irld-11 in N2	d1	r3	../d1_r3_irlds/LRB423_d1_r3/Snap-43-Image Export-43.tif	3	TRUE	739.15
LRB423	irld-11 in N2	d1	r3	../d1_r3_irlds/LRB423_d1_r3/Snap-40-Image Export-40.tif	4	TRUE	702.899
LRB423	irld-11 in N2	d1	r3	../d1_r3_irlds/LRB423_d1_r3/Snap-40-Image Export-40.tif	6	TRUE	714.053
LRB423	irld-11 in N2	d1	r3	../d1_r3_irlds/LRB423_d1_r3/Snap-40-Image Export-40.tif	7	TRUE	785.498
LRB423	irld-11 in N2	d1	r3	../d1_r3_irlds/LRB423_d1_r3/Snap-41-Image Export-41.tif	1	TRUE	658.159
LRB423	irld-11 in N2	d1	r3	../d1_r3_irlds/LRB423_d1_r3/Snap-41-Image Export-41.tif	2	TRUE	676.507
LRB423	irld-11 in N2	d1	r3	../d1_r3_irlds/LRB423_d1_r3/Snap-41-Image Export-41.tif	3	TRUE	707.985
LRB423	irld-11 in N2	d1	r3	../d1_r3_irlds/LRB423_d1_r3/Snap-46-Image Export-46.tif	2	TRUE	713.164
LRB423	irld-11 in N2	d1	r3	../d1_r3_irlds/LRB423_d1_r3/Snap-46-Image Export-46.tif	3	TRUE	731.068
LRB423	irld-11 in N2	d1	r3	../d1_r3_irlds/LRB423_d1_r3/Snap-47-Image Export-47.tif	0	TRUE	706.913
LRB423	irld-11 in N2	d1	r3	../d1_r3_irlds/LRB423_d1_r3/Snap-47-Image Export-47.tif	2	TRUE	728.256
LRB423	irld-11 in N2	d1	r3	../d1_r3_irlds/LRB423_d1_r3/Snap-47-Image Export-47.tif	3	TRUE	737.541
LRB423	irld-11 in N2	d1	r3	../d1_r3_irlds/LRB423_d1_r3/Snap-47-Image Export-47.tif	4	TRUE	703.565
LRB423	irld-11 in N2	d1	r3	../d1_r3_irlds/LRB423_d1_r3/Snap-44-Image Export-44.tif	0	TRUE	694.763
LRB423	irld-11 in N2	d1	r3	../d1_r3_irlds/LRB423_d1_r3/Snap-44-Image Export-44.tif	1	TRUE	722.541
LRB423	irld-11 in N2	d1	r3	../d1_r3_irlds/LRB423_d1_r3/Snap-44-Image Export-44.tif	3	TRUE	706.469
LRB423	irld-11 in N2	d1	r3	../d1_r3_irlds/LRB423_d1_r3/Snap-44-Image Export-44.tif	6	TRUE	735.082
LRB423	irld-11 in N2	d1	r3	../d1_r3_irlds/LRB423_d1_r3/Snap-45-Image Export-45.tif	2	TRUE	750.488
LRB423	irld-11 in N2	d1	r3	../d1_r3_irlds/LRB423_d1_r3/Snap-45-Image Export-45.tif	4	TRUE	799.203
LRB423	irld-11 in N2	d1	r3	../d1_r3_irlds/LRB423_d1_r3/Snap-45-Image Export-45.tif	5	TRUE	728.034
LRB423	irld-11 in N2	d1	r3	../d1_r3_irlds/LRB423_d1_r3/Snap-45-Image Export-45.tif	8	TRUE	725.575
LRB423	irld-11 in N2	d1	r3	../d1_r3_irlds/LRB423_d1_r3/Snap-45-Image Export-45.tif	9	TRUE	718.971
LRB423	irld-11 in N2	d1	r3	../d1_r3_irlds/LRB423_d1_r3/Snap-19-Image Export-19.tif	0	TRUE	693.024
LRB423	irld-11 in N2	d1	r3	../d1_r3_irlds/LRB423_d1_r3/Snap-19-Image Export-19.tif	1	TRUE	730.937
LRB423	irld-11 in N2	d1	r3	../d1_r3_irlds/LRB423_d1_r3/Snap-18-Image Export-18.tif	0	TRUE	732.454
LRB423	irld-11 in N2	d1	r3	../d1_r3_irlds/LRB423_d1_r3/Snap-18-Image Export-18.tif	1	TRUE	711.869
LRB423	irld-11 in N2	d1	r3	../d1_r3_irlds/LRB423_d1_r3/Snap-18-Image Export-18.tif	2	TRUE	743.884
LRB423	irld-11 in N2	d1	r3	../d1_r3_irlds/LRB423_d1_r3/Snap-18-Image Export-18.tif	4	TRUE	695.835
LRB423	irld-11 in N2	d1	r3	../d1_r3_irlds/LRB423_d1_r3/Snap-18-Image Export-18.tif	5	TRUE	762.768
LRB423	irld-11 in N2	d1	r3	../d1_r3_irlds/LRB423_d1_r3/Snap-29-Image Export-29.tif	0	TRUE	727.314
LRB423	irld-11 in N2	d1	r3	../d1_r3_irlds/LRB423_d1_r3/Snap-29-Image Export-29.tif	1	TRUE	695.483
LRB423	irld-11 in N2	d1	r3	../d1_r3_irlds/LRB423_d1_r3/Snap-29-Image Export-29.tif	2	TRUE	738.521
LRB423	irld-11 in N2	d1	r3	../d1_r3_irlds/LRB423_d1_r3/Snap-29-Image Export-29.tif	4	TRUE	816.126
LRB423	irld-11 in N2	d1	r3	../d1_r3_irlds/LRB423_d1_r3/Snap-29-Image Export-29.tif	7	TRUE	725.445
LRB423	irld-11 in N2	d1	r3	../d1_r3_irlds/LRB423_d1_r3/Snap-29-Image Export-29.tif	8	TRUE	715.125
LRB423	irld-11 in N2	d1	r3	../d1_r3_irlds/LRB423_d1_r3/Snap-28-Image Export-28.tif	0	TRUE	715.125
LRB423	irld-11 in N2	d1	r3	../d1_r3_irlds/LRB423_d1_r3/Snap-28-Image Export-28.tif	2	TRUE	726.555
LRB423	irld-11 in N2	d1	r3	../d1_r3_irlds/LRB423_d1_r3/Snap-28-Image Export-28.tif	3	TRUE	708.208
LRB423	irld-11 in N2	d1	r3	../d1_r3_irlds/LRB423_d1_r3/Snap-39-Image Export-39.tif	3	TRUE	726.425
LRB423	irld-11 in N2	d1	r3	../d1_r3_irlds/LRB423_d1_r3/Snap-39-Image Export-39.tif	4	TRUE	754.242
LRB423	irld-11 in N2	d1	r3	../d1_r3_irlds/LRB423_d1_r3/Snap-38-Image Export-38.tif	0	TRUE	748.841
LRB423	irld-11 in N2	d1	r3	../d1_r3_irlds/LRB423_d1_r3/Snap-38-Image Export-38.tif	1	TRUE	738.705
LRB423	irld-11 in N2	d1	r3	../d1_r3_irlds/LRB423_d1_r3/Snap-38-Image Export-38.tif	2	TRUE	683.739
LRB423	irld-11 in N2	d1	r3	../d1_r3_irlds/LRB423_d1_r3/Snap-38-Image Export-38.tif	3	TRUE	755.536
LRB423	irld-11 in N2	d1	r3	../d1_r3_irlds/LRB423_d1_r3/Snap-09-Image Export-09.tif	0	TRUE	728.57
LRB423	irld-11 in N2	d1	r3	../d1_r3_irlds/LRB423_d1_r3/Snap-08-Image Export-08.tif	0	TRUE	697.758
LRB423	irld-11 in N2	d1	r3	../d1_r3_irlds/LRB423_d1_r3/Snap-62-Image Export-62.tif	0	TRUE	749.729
LRB423	irld-11 in N2	d1	r3	../d1_r3_irlds/LRB423_d1_r3/Snap-62-Image Export-62.tif	1	TRUE	743.034
LRB423	irld-11 in N2	d1	r3	../d1_r3_irlds/LRB423_d1_r3/Snap-50-Image Export-50.tif	1	TRUE	699.275
LRB423	irld-11 in N2	d1	r3	../d1_r3_irlds/LRB423_d1_r3/Snap-50-Image Export-50.tif	2	TRUE	717.27
LRB423	irld-11 in N2	d1	r3	../d1_r3_irlds/LRB423_d1_r3/Snap-50-Image Export-50.tif	3	TRUE	722.005
LRB423	irld-11 in N2	d1	r3	../d1_r3_irlds/LRB423_d1_r3/Snap-50-Image Export-50.tif	4	TRUE	736.652
LRB423	irld-11 in N2	d1	r3	../d1_r3_irlds/LRB423_d1_r3/Snap-51-Image Export-51.tif	8	TRUE	678.116
LRB423	irld-11 in N2	d1	r3	../d1_r3_irlds/LRB423_d1_r3/Snap-51-Image Export-51.tif	9	TRUE	732.806
LRB423	irld-11 in N2	d1	r3	../d1_r3_irlds/LRB423_d1_r3/Snap-51-Image Export-51.tif	10	TRUE	691.415
LRB423	irld-11 in N2	d1	r3	../d1_r3_irlds/LRB423_d1_r3/Snap-63-Image Export-63.tif	0	TRUE	726.111
LRB423	irld-11 in N2	d1	r3	../d1_r3_irlds/LRB423_d1_r3/Snap-63-Image Export-63.tif	1	TRUE	743.164
LRB423	irld-11 in N2	d1	r3	../d1_r3_irlds/LRB423_d1_r3/Snap-63-Image Export-63.tif	3	TRUE	749.729
LRB423	irld-11 in N2	d1	r3	../d1_r3_irlds/LRB423_d1_r3/Snap-63-Image Export-63.tif	5	TRUE	736.338
LRB423	irld-11 in N2	d1	r3	../d1_r3_irlds/LRB423_d1_r3/Snap-61-Image Export-61.tif	1	TRUE	763.044
LRB423	irld-11 in N2	d1	r3	../d1_r3_irlds/LRB423_d1_r3/Snap-61-Image Export-61.tif	2	TRUE	758.792
LRB423	irld-11 in N2	d1	r3	../d1_r3_irlds/LRB423_d1_r3/Snap-61-Image Export-61.tif	3	TRUE	673.734
LRB423	irld-11 in N2	d1	r3	../d1_r3_irlds/LRB423_d1_r3/Snap-64-Image Export-64.tif	0	TRUE	713.831
LRB423	irld-11 in N2	d1	r3	../d1_r3_irlds/LRB423_d1_r3/Snap-64-Image Export-64.tif	1	TRUE	728.126
LRB423	irld-11 in N2	d8	r3	../d8_r3_irlds/LRB423_d8_r3/Snap-618-Image Export-39.tif	0	TRUE	470.664
LRB423	irld-11 in N2	d8	r3	../d8_r3_irlds/LRB423_d8_r3/Snap-620-Image Export-41.tif	0	TRUE	492.167
LRB423	irld-11 in N2	d8	r3	../d8_r3_irlds/LRB423_d8_r3/Snap-607-Image Export-28.tif	0	TRUE	528.313
LRB423	irld-11 in N2	d8	r3	../d8_r3_irlds/LRB423_d8_r3/Snap-625-Image Export-46.tif	0	TRUE	470.709
LRB423	irld-11 in N2	d8	r3	../d8_r3_irlds/LRB423_d8_r3/Snap-643-Image Export-64.tif	0	TRUE	575.925
LRB423	irld-11 in N2	d8	r3	../d8_r3_irlds/LRB423_d8_r3/Snap-643-Image Export-64.tif	1	TRUE	453.837
LRB423	irld-11 in N2	d8	r3	../d8_r3_irlds/LRB423_d8_r3/Snap-626-Image Export-47.tif	0	TRUE	494.021
LRB423	irld-11 in N2	d8	r3	../d8_r3_irlds/LRB423_d8_r3/Snap-621-Image Export-42.tif	1	TRUE	425.629
LRB423	irld-11 in N2	d8	r3	../d8_r3_irlds/LRB423_d8_r3/Snap-621-Image Export-42.tif	2	TRUE	351.399
LRB423	irld-11 in N2	d8	r3	../d8_r3_irlds/LRB423_d8_r3/Snap-584-Image Export-05.tif	1	TRUE	303.587
LRB423	irld-11 in N2	d8	r3	../d8_r3_irlds/LRB423_d8_r3/Snap-584-Image Export-05.tif	3	TRUE	430.79
LRB423	irld-11 in N2	d8	r3	../d8_r3_irlds/LRB423_d8_r3/Snap-584-Image Export-05.tif	5	TRUE	483.105
LRB423	irld-11 in N2	d8	r3	../d8_r3_irlds/LRB423_d8_r3/Snap-646-Image Export-67.tif	0	TRUE	440.099
LRB423	irld-11 in N2	d8	r3	../d8_r3_irlds/LRB423_d8_r3/Snap-646-Image Export-67.tif	1	TRUE	446.493
LRB423	irld-11 in N2	d8	r3	../d8_r3_irlds/LRB423_d8_r3/Snap-646-Image Export-67.tif	2	TRUE	432.754
LRB423	irld-11 in N2	d8	r3	../d8_r3_irlds/LRB423_d8_r3/Snap-641-Image Export-62.tif	2	TRUE	474.107
LRB423	irld-11 in N2	d8	r3	../d8_r3_irlds/LRB423_d8_r3/Snap-641-Image Export-62.tif	3	TRUE	470.728
LRB423	irld-11 in N2	d8	r3	../d8_r3_irlds/LRB423_d8_r3/Snap-586-Image Export-07.tif	0	TRUE	479.643
LRB423	irld-11 in N2	d8	r3	../d8_r3_irlds/LRB423_d8_r3/Snap-645-Image Export-66.tif	0	TRUE	397.558
LRB423	irld-11 in N2	d8	r3	../d8_r3_irlds/LRB423_d8_r3/Snap-642-Image Export-63.tif	0	TRUE	484.668
LRB423	irld-11 in N2	d8	r3	../d8_r3_irlds/LRB423_d8_r3/Snap-585-Image Export-06.tif	0	TRUE	338.345
LRB423	irld-11 in N2	d8	r3	../d8_r3_irlds/LRB423_d8_r3/Snap-585-Image Export-06.tif	2	TRUE	437.257
LRB423	irld-11 in N2	d8	r3	../d8_r3_irlds/LRB423_d8_r3/Snap-585-Image Export-06.tif	3	TRUE	465.374
LRB423	irld-11 in N2	d8	r3	../d8_r3_irlds/LRB423_d8_r3/Snap-654-Image Export-75.tif	0	TRUE	506.016
LRB423	irld-11 in N2	d8	r3	../d8_r3_irlds/LRB423_d8_r3/Snap-591-Image Export-12.tif	0	TRUE	340.264
LRB423	irld-11 in N2	d8	r3	../d8_r3_irlds/LRB423_d8_r3/Snap-633-Image Export-54.tif	0	TRUE	447.753
LRB423	irld-11 in N2	d8	r3	../d8_r3_irlds/LRB423_d8_r3/Snap-633-Image Export-54.tif	1	TRUE	447.817
LRB423	irld-11 in N2	d8	r3	../d8_r3_irlds/LRB423_d8_r3/Snap-594-Image Export-15.tif	0	TRUE	472.893
LRB423	irld-11 in N2	d8	r3	../d8_r3_irlds/LRB423_d8_r3/Snap-594-Image Export-15.tif	1	TRUE	469.385
LRB423	irld-11 in N2	d8	r3	../d8_r3_irlds/LRB423_d8_r3/Snap-651-Image Export-72.tif	0	TRUE	605.612
LRB423	irld-11 in N2	d8	r3	../d8_r3_irlds/LRB423_d8_r3/Snap-651-Image Export-72.tif	1	TRUE	430.196
LRB423	irld-11 in N2	d8	r3	../d8_r3_irlds/LRB423_d8_r3/Snap-651-Image Export-72.tif	2	TRUE	501.01
LRB423	irld-11 in N2	d8	r3	../d8_r3_irlds/LRB423_d8_r3/Snap-660-Image Export-81.tif	0	TRUE	428.634
LRB423	irld-11 in N2	d8	r3	../d8_r3_irlds/LRB423_d8_r3/Snap-660-Image Export-81.tif	1	TRUE	466.498
LRB423	irld-11 in N2	d8	r3	../d8_r3_irlds/LRB423_d8_r3/Snap-660-Image Export-81.tif	2	TRUE	358.259
LRB423	irld-11 in N2	d8	r3	../d8_r3_irlds/LRB423_d8_r3/Snap-660-Image Export-81.tif	3	TRUE	461.711
LRB423	irld-11 in N2	d8	r3	../d8_r3_irlds/LRB423_d8_r3/Snap-660-Image Export-81.tif	4	TRUE	333.339
LRB423	irld-11 in N2	d8	r3	../d8_r3_irlds/LRB423_d8_r3/Snap-660-Image Export-81.tif	5	TRUE	504.828
LRB423	irld-11 in N2	d8	r3	../d8_r3_irlds/LRB423_d8_r3/Snap-661-Image Export-82.tif	0	TRUE	488.705
LRB423	irld-11 in N2	d8	r3	../d8_r3_irlds/LRB423_d8_r3/Snap-650-Image Export-71.tif	0	TRUE	375.835
LRB423	irld-11 in N2	d8	r3	../d8_r3_irlds/LRB423_d8_r3/Snap-650-Image Export-71.tif	1	TRUE	480.585
LRB423	irld-11 in N2	d8	r3	../d8_r3_irlds/LRB423_d8_r3/Snap-650-Image Export-71.tif	2	TRUE	505.111
LRB423	irld-11 in N2	d8	r3	../d8_r3_irlds/LRB423_d8_r3/Snap-595-Image Export-16.tif	0	TRUE	490.158
LRB423	irld-11 in N2	d8	r3	../d8_r3_irlds/LRB423_d8_r3/Snap-592-Image Export-13.tif	0	TRUE	334.993
LRB423	irld-11 in N2	d8	r3	../d8_r3_irlds/LRB423_d8_r3/Snap-592-Image Export-13.tif	1	TRUE	316.732
LRB423	irld-11 in N2	d8	r3	../d8_r3_irlds/LRB423_d8_r3/Snap-592-Image Export-13.tif	2	TRUE	490.094
LRB423	irld-11 in N2	d8	r3	../d8_r3_irlds/LRB423_d8_r3/Snap-649-Image Export-70.tif	8	TRUE	325.091
LRB423	irld-11 in N2	d8	r3	../d8_r3_irlds/LRB423_d8_r3/Snap-649-Image Export-70.tif	10	TRUE	341.698
LRB423	irld-11 in N2	d8	r3	../d8_r3_irlds/LRB423_d8_r3/Snap-655-Image Export-76.tif	0	TRUE	450.375
LRB423	irld-11 in N2	d8	r3	../d8_r3_irlds/LRB423_d8_r3/Snap-652-Image Export-73.tif	2	TRUE	495.346
LRB423	irld-11 in N2	d8	r3	../d8_r3_irlds/LRB423_d8_r3/Snap-652-Image Export-73.tif	3	TRUE	596.259
LRB423	irld-11 in N2	d8	r3	../d8_r3_irlds/LRB423_d8_r3/Snap-652-Image Export-73.tif	4	TRUE	492.057
LRB423	irld-11 in N2	d8	r3	../d8_r3_irlds/LRB423_d8_r3/Snap-652-Image Export-73.tif	5	TRUE	323.373
LRB423	irld-11 in N2	d8	r3	../d8_r3_irlds/LRB423_d8_r3/Snap-617-Image Export-38.tif	0	TRUE	564.725
LRB423	irld-11 in N2	d8	r3	../d8_r3_irlds/LRB423_d8_r3/Snap-635-Image Export-56.tif	0	TRUE	449.672
LRB423	irld-11 in N2	d8	r3	../d8_r3_irlds/LRB423_d8_r3/Snap-635-Image Export-56.tif	1	TRUE	450.595
LRB423	irld-11 in N2	d8	r3	../d8_r3_irlds/LRB423_d8_r3/Snap-608-Image Export-29.tif	0	TRUE	420.185
LRB423	irld-11 in N2	d8	r3	../d8_r3_irlds/LRB423_d8_r3/Snap-636-Image Export-57.tif	0	TRUE	459.903
LRB423	irld-11 in N2	d8	r3	../d8_r3_irlds/LRB423_d8_r3/Snap-636-Image Export-57.tif	1	TRUE	526.468
LRB423	irld-11 in N2	d8	r3	../d8_r3_irlds/LRB423_d8_r3/Snap-636-Image Export-57.tif	2	TRUE	447.882
LRB423	irld-11 in N2	d8	r3	../d8_r3_irlds/LRB423_d8_r3/Snap-631-Image Export-52.tif	0	TRUE	465.548
LRB423	irld-11 in N2	d8	r3	../d8_r3_irlds/LRB423_d8_r3/Snap-631-Image Export-52.tif	2	TRUE	436.856
LRB423	irld-11 in N2	d8	r3	../d8_r3_irlds/LRB423_d8_r3/Snap-593-Image Export-14.tif	0	TRUE	426.204
LRB423	irld-11 in N2	d8	r3	../d8_r3_irlds/LRB423_d8_r3/Snap-593-Image Export-14.tif	1	TRUE	488.815
LRB423	irld-11 in N2	d8	r3	../d8_r3_irlds/LRB423_d8_r3/Snap-634-Image Export-55.tif	0	TRUE	522.732
LRB423	irld-11 in N2	d8	r3	../d8_r3_irlds/LRB423_d8_r3/Snap-653-Image Export-74.tif	1	TRUE	437.696
LRB423	irld-11 in N2	d8	r3	../d8_r3_irlds/LRB423_d8_r3/Snap-653-Image Export-74.tif	2	TRUE	487.691
LRB423	irld-11 in N2	d8	r3	../d8_r3_irlds/LRB423_d8_r3/Snap-614-Image Export-35.tif	0	TRUE	466.972
LRB423	irld-11 in N2	d8	r3	../d8_r3_irlds/LRB423_d8_r3/Snap-614-Image Export-35.tif	1	TRUE	592.952
LRB423	irld-11 in N2	d8	r3	../d8_r3_irlds/LRB423_d8_r3/Snap-614-Image Export-35.tif	3	TRUE	436.417
LRB423	irld-11 in N2	d8	r3	../d8_r3_irlds/LRB423_d8_r3/Snap-616-Image Export-37.tif	0	TRUE	641.823
LRB423	irld-11 in N2	d8	r3	../d8_r3_irlds/LRB423_d8_r3/Snap-611-Image Export-32.tif	0	TRUE	407.706
LRB423	irld-11 in N2	d8	r3	../d8_r3_irlds/LRB423_d8_r3/Snap-611-Image Export-32.tif	1	TRUE	279.727
LRB423	irld-11 in N2	d8	r3	../d8_r3_irlds/LRB423_d8_r3/Snap-611-Image Export-32.tif	2	TRUE	453.198
LRB423	irld-11 in N2	d8	r3	../d8_r3_irlds/LRB423_d8_r3/Snap-611-Image Export-32.tif	3	TRUE	506.791
LRB423	irld-11 in N2	d8	r3	../d8_r3_irlds/LRB423_d8_r3/Snap-611-Image Export-32.tif	4	TRUE	411.406
LRB423	irld-11 in N2	d8	r3	../d8_r3_irlds/LRB423_d8_r3/Snap-610-Image Export-31.tif	1	TRUE	528.049
LRB423	irld-11 in N2	d8	r3	../d8_r3_irlds/LRB423_d8_r3/Snap-610-Image Export-31.tif	2	TRUE	479.707
LRB423	irld-11 in N2	d8	r3	../d8_r3_irlds/LRB423_d8_r3/Snap-615-Image Export-36.tif	0	TRUE	483.544
LRB423	irld-11 in N2	d8	r3	../d8_r3_irlds/LRB423_d8_r3/Snap-615-Image Export-36.tif	1	TRUE	430.881
LRB423	irld-11 in N2	d8	r3	../d8_r3_irlds/LRB423_d8_r3/Snap-615-Image Export-36.tif	2	TRUE	308.329
LRB423	irld-11 in N2	d8	r3	../d8_r3_irlds/LRB423_d8_r3/Snap-612-Image Export-33.tif	0	TRUE	493.601
LRB423	irld-11 in N2	d8	r3	../d8_r3_irlds/LRB423_d8_r3/Snap-612-Image Export-33.tif	1	TRUE	554.028
LRB423	irld-11 in N2	d8	r3	../d8_r3_irlds/LRB423_d8_r3/Snap-637-Image Export-58.tif	4	TRUE	426.405
LRB423	irld-11 in N2	d8	r3	../d8_r3_irlds/LRB423_d8_r3/Snap-637-Image Export-58.tif	5	TRUE	512.766
LRB423	irld-11 in N2	d8	r3	../d8_r3_irlds/LRB423_d8_r3/Snap-619-Image Export-40.tif	0	TRUE	445.479
LRB423	irld-11 in N2	d8	r3	../d8_r3_irlds/LRB423_d8_r3/Snap-619-Image Export-40.tif	1	TRUE	349.417
LRB423	irld-11 in N2	d8	r3	../d8_r3_irlds/LRB423_d8_r3/Snap-619-Image Export-40.tif	2	TRUE	467.932
LRB423	irld-11 in N2	d8	r3	../d8_r3_irlds/LRB423_d8_r3/Snap-619-Image Export-40.tif	3	TRUE	471.394
LRB423	irld-11 in N2	d8	r3	../d8_r3_irlds/LRB423_d8_r3/Snap-657-Image Export-78.tif	1	TRUE	430.196
LRB423	irld-11 in N2	d8	r3	../d8_r3_irlds/LRB423_d8_r3/Snap-657-Image Export-78.tif	2	TRUE	249.865
LRB423	irld-11 in N2	d8	r3	../d8_r3_irlds/LRB423_d8_r3/Snap-657-Image Export-78.tif	3	TRUE	559.299
LRB423	irld-11 in N2	d8	r3	../d8_r3_irlds/LRB423_d8_r3/Snap-657-Image Export-78.tif	4	TRUE	460.058
LRB423	irld-11 in N2	d8	r3	../d8_r3_irlds/LRB423_d8_r3/Snap-657-Image Export-78.tif	5	TRUE	545.349
LRB423	irld-11 in N2	d8	r3	../d8_r3_irlds/LRB423_d8_r3/Snap-588-Image Export-09.tif	0	TRUE	596.368
LRB423	irld-11 in N2	d8	r3	../d8_r3_irlds/LRB423_d8_r3/Snap-588-Image Export-09.tif	1	TRUE	586.009
LRB423	irld-11 in N2	d8	r3	../d8_r3_irlds/LRB423_d8_r3/Snap-588-Image Export-09.tif	2	TRUE	348.247
LRB423	irld-11 in N2	d8	r3	../d8_r3_irlds/LRB423_d8_r3/Snap-597-Image Export-18.tif	0	TRUE	461.273
LRB423	irld-11 in N2	d8	r3	../d8_r3_irlds/LRB423_d8_r3/Snap-648-Image Export-69.tif	0	TRUE	482.73
LRB423	irld-11 in N2	d8	r3	../d8_r3_irlds/LRB423_d8_r3/Snap-648-Image Export-69.tif	1	TRUE	523.198
LRB423	irld-11 in N2	d8	r3	../d8_r3_irlds/LRB423_d8_r3/Snap-648-Image Export-69.tif	5	TRUE	501.85
LRB423	irld-11 in N2	d8	r3	../d8_r3_irlds/LRB423_d8_r3/Snap-613-Image Export-34.tif	0	TRUE	446.493
LRB423	irld-11 in N2	d8	r3	../d8_r3_irlds/LRB423_d8_r3/Snap-639-Image Export-60.tif	0	TRUE	521.718
LRB423	irld-11 in N2	d8	r3	../d8_r3_irlds/LRB423_d8_r3/Snap-639-Image Export-60.tif	2	TRUE	566.662
LRB423	irld-11 in N2	d8	r3	../d8_r3_irlds/LRB423_d8_r3/Snap-639-Image Export-60.tif	3	TRUE	509.724
LRB423	irld-11 in N2	d8	r3	../d8_r3_irlds/LRB423_d8_r3/Snap-587-Image Export-08.tif	0	TRUE	350.431
LRB423	irld-11 in N2	d8	r3	../d8_r3_irlds/LRB423_d8_r3/Snap-587-Image Export-08.tif	1	TRUE	516.648
LRB423	irld-11 in N2	d8	r3	../d8_r3_irlds/LRB423_d8_r3/Snap-587-Image Export-08.tif	2	TRUE	325.401
LRB423	irld-11 in N2	d8	r3	../d8_r3_irlds/LRB423_d8_r3/Snap-658-Image Export-79.tif	0	TRUE	319.4
LRB423	irld-11 in N2	d8	r3	../d8_r3_irlds/LRB423_d8_r3/Snap-658-Image Export-79.tif	1	TRUE	510.738
LRB423	irld-11 in N2	d8	r3	../d8_r3_irlds/LRB423_d8_r3/Snap-603-Image Export-24.tif	0	TRUE	482.155
LRB423	irld-11 in N2	d8	r3	../d8_r3_irlds/LRB423_d8_r3/Snap-604-Image Export-25.tif	0	TRUE	604.553
LRB423	irld-11 in N2	d8	r3	../d8_r3_irlds/LRB423_d8_r3/Snap-604-Image Export-25.tif	1	TRUE	336.381
LRB423	irld-11 in N2	d8	r3	../d8_r3_irlds/LRB423_d8_r3/Snap-604-Image Export-25.tif	2	TRUE	500.261
LRB423	irld-11 in N2	d8	r3	../d8_r3_irlds/LRB423_d8_r3/Snap-605-Image Export-26.tif	0	TRUE	509.943
LRB423	irld-11 in N2	d8	r3	../d8_r3_irlds/LRB423_d8_r3/Snap-605-Image Export-26.tif	1	TRUE	462.835
LRB423	irld-11 in N2	d8	r3	../d8_r3_irlds/LRB423_d8_r3/Snap-602-Image Export-23.tif	3	TRUE	477.259
LRB423	irld-11 in N2	d8	r3	../d8_r3_irlds/LRB423_d8_r3/Snap-600-Image Export-21.tif	3	TRUE	447.553
LRB423	irld-11 in N2	d8	r3	../d8_r3_irlds/LRB423_d8_r3/Snap-638-Image Export-59.tif	1	TRUE	494.305
LRB423	irld-11 in N2	d8	r3	../d8_r3_irlds/LRB423_d8_r3/Snap-638-Image Export-59.tif	2	TRUE	520.905
LRB423	irld-11 in N2	d8	r3	../d8_r3_irlds/LRB423_d8_r3/Snap-638-Image Export-59.tif	4	TRUE	492.122
LRB423	irld-11 in N2	d1	r4	../d1_r4_irlds/LRB423_d1_r4/Snap-311-Image Export-136.tif	0	TRUE	814.517
LRB423	irld-11 in N2	d1	r4	../d1_r4_irlds/LRB423_d1_r4/Snap-311-Image Export-136.tif	1	TRUE	762.638
LRB423	irld-11 in N2	d1	r4	../d1_r4_irlds/LRB423_d1_r4/Snap-267-Image Export-92.tif	0	TRUE	778.082
LRB423	irld-11 in N2	d1	r4	../d1_r4_irlds/LRB423_d1_r4/Snap-265-Image Export-90.tif	1	TRUE	848.455
LRB423	irld-11 in N2	d1	r4	../d1_r4_irlds/LRB423_d1_r4/Snap-265-Image Export-90.tif	2	TRUE	797.686
LRB423	irld-11 in N2	d1	r4	../d1_r4_irlds/LRB423_d1_r4/Snap-266-Image Export-91.tif	2	TRUE	801.843
LRB423	irld-11 in N2	d1	r4	../d1_r4_irlds/LRB423_d1_r4/Snap-266-Image Export-91.tif	3	TRUE	805.232
LRB423	irld-11 in N2	d1	r4	../d1_r4_irlds/LRB423_d1_r4/Snap-266-Image Export-91.tif	4	TRUE	793.358
LRB423	irld-11 in N2	d1	r4	../d1_r4_irlds/LRB423_d1_r4/Snap-266-Image Export-91.tif	5	TRUE	754.686
LRB423	irld-11 in N2	d1	r4	../d1_r4_irlds/LRB423_d1_r4/Snap-266-Image Export-91.tif	6	TRUE	843.406
LRB423	irld-11 in N2	d1	r4	../d1_r4_irlds/LRB423_d1_r4/Snap-327-Image Export-152.tif	0	TRUE	660.787
LRB423	irld-11 in N2	d1	r4	../d1_r4_irlds/LRB423_d1_r4/Snap-327-Image Export-152.tif	1	TRUE	794.561
LRB423	irld-11 in N2	d1	r4	../d1_r4_irlds/LRB423_d1_r4/Snap-251-Image Export-76.tif	0	TRUE	808.802
LRB423	irld-11 in N2	d1	r4	../d1_r4_irlds/LRB423_d1_r4/Snap-251-Image Export-76.tif	2	TRUE	782.686
LRB423	irld-11 in N2	d1	r4	../d1_r4_irlds/LRB423_d1_r4/Snap-251-Image Export-76.tif	3	TRUE	703.473
LRB423	irld-11 in N2	d1	r4	../d1_r4_irlds/LRB423_d1_r4/Snap-260-Image Export-85.tif	0	TRUE	832.29
LRB423	irld-11 in N2	d1	r4	../d1_r4_irlds/LRB423_d1_r4/Snap-322-Image Export-147.tif	0	TRUE	854.3
LRB423	irld-11 in N2	d1	r4	../d1_r4_irlds/LRB423_d1_r4/Snap-322-Image Export-147.tif	1	TRUE	827.242
LRB423	irld-11 in N2	d1	r4	../d1_r4_irlds/LRB423_d1_r4/Snap-322-Image Export-147.tif	2	TRUE	827.242
LRB423	irld-11 in N2	d1	r4	../d1_r4_irlds/LRB423_d1_r4/Snap-295-Image Export-120.tif	2	TRUE	796.928
LRB423	irld-11 in N2	d1	r4	../d1_r4_irlds/LRB423_d1_r4/Snap-278-Image Export-103.tif	0	TRUE	754.556
LRB423	irld-11 in N2	d1	r4	../d1_r4_irlds/LRB423_d1_r4/Snap-278-Image Export-103.tif	2	TRUE	812.204
LRB423	irld-11 in N2	d1	r4	../d1_r4_irlds/LRB423_d1_r4/Snap-278-Image Export-103.tif	3	TRUE	831.754
LRB423	irld-11 in N2	d1	r4	../d1_r4_irlds/LRB423_d1_r4/Snap-309-Image Export-134.tif	1	TRUE	809.875
LRB423	irld-11 in N2	d1	r4	../d1_r4_irlds/LRB423_d1_r4/Snap-309-Image Export-134.tif	2	TRUE	790.14
LRB423	irld-11 in N2	d1	r4	../d1_r4_irlds/LRB423_d1_r4/Snap-328-Image Export-153.tif	0	TRUE	725.038
LRB423	irld-11 in N2	d1	r4	../d1_r4_irlds/LRB423_d1_r4/Snap-328-Image Export-153.tif	1	TRUE	800.682
LRB423	irld-11 in N2	d1	r4	../d1_r4_irlds/LRB423_d1_r4/Snap-328-Image Export-153.tif	2	TRUE	778.618
LRB423	irld-11 in N2	d1	r4	../d1_r4_irlds/LRB423_d1_r4/Snap-252-Image Export-77.tif	0	TRUE	845.015
LRB423	irld-11 in N2	d1	r4	../d1_r4_irlds/LRB423_d1_r4/Snap-252-Image Export-77.tif	1	TRUE	696.463
LRB423	irld-11 in N2	d1	r4	../d1_r4_irlds/LRB423_d1_r4/Snap-252-Image Export-77.tif	2	TRUE	810.503
LRB423	irld-11 in N2	d1	r4	../d1_r4_irlds/LRB423_d1_r4/Snap-277-Image Export-102.tif	0	TRUE	849.083
LRB423	irld-11 in N2	d1	r4	../d1_r4_irlds/LRB423_d1_r4/Snap-277-Image Export-102.tif	1	TRUE	809.116
LRB423	irld-11 in N2	d1	r4	../d1_r4_irlds/LRB423_d1_r4/Snap-277-Image Export-102.tif	2	TRUE	784.962
LRB423	irld-11 in N2	d1	r4	../d1_r4_irlds/LRB423_d1_r4/Snap-324-Image Export-149.tif	0	TRUE	856.575
LRB423	irld-11 in N2	d1	r4	../d1_r4_irlds/LRB423_d1_r4/Snap-324-Image Export-149.tif	1	TRUE	810.097
LRB423	irld-11 in N2	d1	r4	../d1_r4_irlds/LRB423_d1_r4/Snap-324-Image Export-149.tif	2	TRUE	740.038
LRB423	irld-11 in N2	d1	r4	../d1_r4_irlds/LRB423_d1_r4/Snap-324-Image Export-149.tif	3	TRUE	807.507
LRB423	irld-11 in N2	d1	r4	../d1_r4_irlds/LRB423_d1_r4/Snap-330-Image Export-155.tif	0	TRUE	833.049
LRB423	irld-11 in N2	d1	r4	../d1_r4_irlds/LRB423_d1_r4/Snap-330-Image Export-155.tif	1	TRUE	871.759
LRB423	irld-11 in N2	d1	r4	../d1_r4_irlds/LRB423_d1_r4/Snap-330-Image Export-155.tif	2	TRUE	813
LRB423	irld-11 in N2	d1	r4	../d1_r4_irlds/LRB423_d1_r4/Snap-304-Image Export-129.tif	0	TRUE	847.827
LRB423	irld-11 in N2	d1	r4	../d1_r4_irlds/LRB423_d1_r4/Snap-304-Image Export-129.tif	1	TRUE	835.232
LRB423	irld-11 in N2	d1	r4	../d1_r4_irlds/LRB423_d1_r4/Snap-313-Image Export-138.tif	0	TRUE	806.083
LRB423	irld-11 in N2	d1	r4	../d1_r4_irlds/LRB423_d1_r4/Snap-313-Image Export-138.tif	1	TRUE	775.807
LRB423	irld-11 in N2	d1	r4	../d1_r4_irlds/LRB423_d1_r4/Snap-313-Image Export-138.tif	2	TRUE	833.363
LRB423	irld-11 in N2	d1	r4	../d1_r4_irlds/LRB423_d1_r4/Snap-310-Image Export-135.tif	0	TRUE	786.609
LRB423	irld-11 in N2	d1	r4	../d1_r4_irlds/LRB423_d1_r4/Snap-310-Image Export-135.tif	1	TRUE	841.353
LRB423	irld-11 in N2	d1	r4	../d1_r4_irlds/LRB423_d1_r4/Snap-310-Image Export-135.tif	2	TRUE	831.976
LRB423	irld-11 in N2	d1	r4	../d1_r4_irlds/LRB423_d1_r4/Snap-269-Image Export-94.tif	0	TRUE	822.691
LRB423	irld-11 in N2	d1	r4	../d1_r4_irlds/LRB423_d1_r4/Snap-269-Image Export-94.tif	1	TRUE	829.831
LRB423	irld-11 in N2	d1	r4	../d1_r4_irlds/LRB423_d1_r4/Snap-272-Image Export-97.tif	0	TRUE	831.218
LRB423	irld-11 in N2	d1	r4	../d1_r4_irlds/LRB423_d1_r4/Snap-272-Image Export-97.tif	1	TRUE	799.962
LRB423	irld-11 in N2	d1	r4	../d1_r4_irlds/LRB423_d1_r4/Snap-308-Image Export-133.tif	0	TRUE	819.658
LRB423	irld-11 in N2	d1	r4	../d1_r4_irlds/LRB423_d1_r4/Snap-329-Image Export-154.tif	0	TRUE	668.111
LRB423	irld-11 in N2	d1	r4	../d1_r4_irlds/LRB423_d1_r4/Snap-329-Image Export-154.tif	1	TRUE	772.995
LRB423	irld-11 in N2	d1	r4	../d1_r4_irlds/LRB423_d1_r4/Snap-294-Image Export-119.tif	0	TRUE	860.329
LRB423	irld-11 in N2	d1	r4	../d1_r4_irlds/LRB423_d1_r4/Snap-294-Image Export-119.tif	1	TRUE	845.957
LRB423	irld-11 in N2	d1	r4	../d1_r4_irlds/LRB423_d1_r4/Snap-294-Image Export-119.tif	2	TRUE	801.034
LRB423	irld-11 in N2	d1	r4	../d1_r4_irlds/LRB423_d1_r4/Snap-294-Image Export-119.tif	3	TRUE	854.928
LRB423	irld-11 in N2	d1	r4	../d1_r4_irlds/LRB423_d1_r4/Snap-294-Image Export-119.tif	4	TRUE	807.507
LRB423	irld-11 in N2	d1	r4	../d1_r4_irlds/LRB423_d1_r4/Snap-294-Image Export-119.tif	5	TRUE	820.768
LRB423	irld-11 in N2	d1	r4	../d1_r4_irlds/LRB423_d1_r4/Snap-283-Image Export-108.tif	0	TRUE	823.228
LRB423	irld-11 in N2	d1	r4	../d1_r4_irlds/LRB423_d1_r4/Snap-283-Image Export-108.tif	1	TRUE	802.015
LRB423	irld-11 in N2	d1	r4	../d1_r4_irlds/LRB423_d1_r4/Snap-283-Image Export-108.tif	2	TRUE	823.228
LRB423	irld-11 in N2	d1	r4	../d1_r4_irlds/LRB423_d1_r4/Snap-285-Image Export-110.tif	1	TRUE	839.3
LRB423	irld-11 in N2	d1	r4	../d1_r4_irlds/LRB423_d1_r4/Snap-285-Image Export-110.tif	3	TRUE	811.039
LRB423	irld-11 in N2	d1	r4	../d1_r4_irlds/LRB423_d1_r4/Snap-285-Image Export-110.tif	4	TRUE	826.575
LRB423	irld-11 in N2	d1	r4	../d1_r4_irlds/LRB423_d1_r4/Snap-292-Image Export-117.tif	0	TRUE	820.102
LRB423	irld-11 in N2	d1	r4	../d1_r4_irlds/LRB423_d1_r4/Snap-292-Image Export-117.tif	1	TRUE	803.179
LRB423	irld-11 in N2	d1	r4	../d1_r4_irlds/LRB423_d1_r4/Snap-292-Image Export-117.tif	2	TRUE	742.72
LRB423	irld-11 in N2	d1	r4	../d1_r4_irlds/LRB423_d1_r4/Snap-292-Image Export-117.tif	3	TRUE	802.643
LRB423	irld-11 in N2	d1	r4	../d1_r4_irlds/LRB423_d1_r4/Snap-292-Image Export-117.tif	4	TRUE	836.489
LRB423	irld-11 in N2	d1	r4	../d1_r4_irlds/LRB423_d1_r4/Snap-279-Image Export-104.tif	0	TRUE	807.193
LRB423	irld-11 in N2	d1	r4	../d1_r4_irlds/LRB423_d1_r4/Snap-279-Image Export-104.tif	1	TRUE	814.609
LRB423	irld-11 in N2	d1	r4	../d1_r4_irlds/LRB423_d1_r4/Snap-279-Image Export-104.tif	2	TRUE	801.126
LRB423	irld-11 in N2	d1	r4	../d1_r4_irlds/LRB423_d1_r4/Snap-271-Image Export-96.tif	2	TRUE	856.629
LRB423	irld-11 in N2	d1	r4	../d1_r4_irlds/LRB423_d1_r4/Snap-271-Image Export-96.tif	3	TRUE	796.484
LRB423	irld-11 in N2	d1	r4	../d1_r4_irlds/LRB423_d1_r4/Snap-307-Image Export-132.tif	1	TRUE	811.836
LRB423	irld-11 in N2	d1	r4	../d1_r4_irlds/LRB423_d1_r4/Snap-302-Image Export-127.tif	0	TRUE	817.957
LRB423	irld-11 in N2	d1	r4	../d1_r4_irlds/LRB423_d1_r4/Snap-302-Image Export-127.tif	1	TRUE	836.933
LRB423	irld-11 in N2	d1	r4	../d1_r4_irlds/LRB423_d1_r4/Snap-268-Image Export-93.tif	0	TRUE	857.203
LRB423	irld-11 in N2	d1	r4	../d1_r4_irlds/LRB423_d1_r4/Snap-268-Image Export-93.tif	1	TRUE	807.377
LRB423	irld-11 in N2	d1	r4	../d1_r4_irlds/LRB423_d1_r4/Snap-268-Image Export-93.tif	2	TRUE	821.305
LRB423	irld-11 in N2	d1	r4	../d1_r4_irlds/LRB423_d1_r4/Snap-326-Image Export-151.tif	0	TRUE	863.547
LRB423	irld-11 in N2	d1	r4	../d1_r4_irlds/LRB423_d1_r4/Snap-326-Image Export-151.tif	2	TRUE	839.208
LRB423	irld-11 in N2	d1	r4	../d1_r4_irlds/LRB423_d1_r4/Snap-276-Image Export-101.tif	0	TRUE	705.082
LRB423	irld-11 in N2	d1	r4	../d1_r4_irlds/LRB423_d1_r4/Snap-276-Image Export-101.tif	1	TRUE	830.367
LRB423	irld-11 in N2	d1	r4	../d1_r4_irlds/LRB423_d1_r4/Snap-276-Image Export-101.tif	2	TRUE	805.991
LRB423	irld-11 in N2	d1	r4	../d1_r4_irlds/LRB423_d1_r4/Snap-259-Image Export-84.tif	0	TRUE	789.16
LRB423	irld-11 in N2	d1	r4	../d1_r4_irlds/LRB423_d1_r4/Snap-259-Image Export-84.tif	1	TRUE	818.807
LRB423	irld-11 in N2	d1	r4	../d1_r4_irlds/LRB423_d1_r4/Snap-298-Image Export-123.tif	0	TRUE	777.324
LRB423	irld-11 in N2	d1	r4	../d1_r4_irlds/LRB423_d1_r4/Snap-298-Image Export-123.tif	1	TRUE	744.42
LRB423	irld-11 in N2	d1	r4	../d1_r4_irlds/LRB423_d1_r4/Snap-298-Image Export-123.tif	2	TRUE	862.696
LRB423	irld-11 in N2	d1	r4	../d1_r4_irlds/LRB423_d1_r4/Snap-275-Image Export-100.tif	0	TRUE	765.005
LRB423	irld-11 in N2	d1	r4	../d1_r4_irlds/LRB423_d1_r4/Snap-275-Image Export-100.tif	1	TRUE	811.391
LRB423	irld-11 in N2	d1	r4	../d1_r4_irlds/LRB423_d1_r4/Snap-275-Image Export-100.tif	2	TRUE	814.073
LRB423	irld-11 in N2	d1	r4	../d1_r4_irlds/LRB423_d1_r4/Snap-275-Image Export-100.tif	3	TRUE	802.643
LRB423	irld-11 in N2	d1	r4	../d1_r4_irlds/LRB423_d1_r4/Snap-332-Image Export-157.tif	0	TRUE	810.097
LRB423	irld-11 in N2	d1	r4	../d1_r4_irlds/LRB423_d1_r4/Snap-332-Image Export-157.tif	1	TRUE	750.135
LRB423	irld-11 in N2	d1	r4	../d1_r4_irlds/LRB423_d1_r4/Snap-332-Image Export-157.tif	2	TRUE	837.875
LRB423	irld-11 in N2	d1	r4	../d1_r4_irlds/LRB423_d1_r4/Snap-332-Image Export-157.tif	3	TRUE	823.764
LRB423	irld-11 in N2	d1	r4	../d1_r4_irlds/LRB423_d1_r4/Snap-274-Image Export-99.tif	1	TRUE	809.205
LRB423	irld-11 in N2	d1	r4	../d1_r4_irlds/LRB423_d1_r4/Snap-274-Image Export-99.tif	2	TRUE	792.73
LRB423	irld-11 in N2	d1	r4	../d1_r4_irlds/LRB423_d1_r4/Snap-274-Image Export-99.tif	3	TRUE	822.913
LRB423	irld-11 in N2	d1	r4	../d1_r4_irlds/LRB423_d1_r4/Snap-274-Image Export-99.tif	4	TRUE	832.735
LRB423	irld-11 in N2	d1	r4	../d1_r4_irlds/LRB423_d1_r4/Snap-274-Image Export-99.tif	5	TRUE	278.441
LRB423	irld-11 in N2	d1	r4	../d1_r4_irlds/LRB423_d1_r4/Snap-325-Image Export-150.tif	0	TRUE	822.155
LRB423	irld-11 in N2	d1	r4	../d1_r4_irlds/LRB423_d1_r4/Snap-325-Image Export-150.tif	2	TRUE	833.271
LRB423	irld-11 in N2	d1	r4	../d1_r4_irlds/LRB423_d1_r4/Snap-325-Image Export-150.tif	3	TRUE	829.831
LRB423	irld-11 in N2	d1	r4	../d1_r4_irlds/LRB423_d1_r4/Snap-325-Image Export-150.tif	4	TRUE	830.866
LRB423	irld-11 in N2	d1	r4	../d1_r4_irlds/LRB423_d1_r4/Snap-289-Image Export-114.tif	0	TRUE	791.657
LRB423	irld-11 in N2	d1	r4	../d1_r4_irlds/LRB423_d1_r4/Snap-289-Image Export-114.tif	1	TRUE	802.551
LRB423	irld-11 in N2	d1	r4	../d1_r4_irlds/LRB423_d1_r4/Snap-320-Image Export-145.tif	0	TRUE	810.319
LRB423	irld-11 in N2	d1	r4	../d1_r4_irlds/LRB423_d1_r4/Snap-320-Image Export-145.tif	1	TRUE	821.397
LRB423	irld-11 in N2	d1	r4	../d1_r4_irlds/LRB423_d1_r4/Snap-320-Image Export-145.tif	2	TRUE	790.97
LRB423	irld-11 in N2	d1	r4	../d1_r4_irlds/LRB423_d1_r4/Snap-320-Image Export-145.tif	3	TRUE	816.662
LRB423	irld-11 in N2	d1	r4	../d1_r4_irlds/LRB423_d1_r4/Snap-297-Image Export-122.tif	0	TRUE	807.914
LRB423	irld-11 in N2	d1	r4	../d1_r4_irlds/LRB423_d1_r4/Snap-297-Image Export-122.tif	2	TRUE	842.112
LRB423	irld-11 in N2	d1	r4	../d1_r4_irlds/LRB423_d1_r4/Snap-317-Image Export-142.tif	0	TRUE	809.745
LRB423	irld-11 in N2	d1	r4	../d1_r4_irlds/LRB423_d1_r4/Snap-317-Image Export-142.tif	1	TRUE	811.131
LRB423	irld-11 in N2	d1	r4	../d1_r4_irlds/LRB423_d1_r4/Snap-317-Image Export-142.tif	2	TRUE	837.913
LRB423	irld-11 in N2	d1	r4	../d1_r4_irlds/LRB423_d1_r4/Snap-317-Image Export-142.tif	4	TRUE	783.981
LRB423	irld-11 in N2	d1	r4	../d1_r4_irlds/LRB423_d1_r4/Snap-258-Image Export-83.tif	0	TRUE	863.233
LRB423	irld-11 in N2	d1	r4	../d1_r4_irlds/LRB423_d1_r4/Snap-258-Image Export-83.tif	1	TRUE	842.648
LRB423	irld-11 in N2	d1	r4	../d1_r4_irlds/LRB423_d1_r4/Snap-291-Image Export-116.tif	1	TRUE	866.266
LRB423	irld-11 in N2	d1	r4	../d1_r4_irlds/LRB423_d1_r4/Snap-291-Image Export-116.tif	3	TRUE	822.155
LRB423	irld-11 in N2	d1	r4	../d1_r4_irlds/LRB423_d1_r4/Snap-291-Image Export-116.tif	4	TRUE	796.392
LRB423	irld-11 in N2	d1	r4	../d1_r4_irlds/LRB423_d1_r4/Snap-301-Image Export-126.tif	0	TRUE	820.638
LRB423	irld-11 in N2	d1	r4	../d1_r4_irlds/LRB423_d1_r4/Snap-273-Image Export-98.tif	0	TRUE	818.493
LRB423	irld-11 in N2	d1	r4	../d1_r4_irlds/LRB423_d1_r4/Snap-273-Image Export-98.tif	1	TRUE	664.579
LRB423	irld-11 in N2	d1	r4	../d1_r4_irlds/LRB423_d1_r4/Snap-273-Image Export-98.tif	2	TRUE	824.875
LRB423	irld-11 in N2	d1	r4	../d1_r4_irlds/LRB423_d1_r4/Snap-318-Image Export-143.tif	0	TRUE	819.566
LRB423	irld-11 in N2	d1	r4	../d1_r4_irlds/LRB423_d1_r4/Snap-318-Image Export-143.tif	1	TRUE	800.812
LRB423	irld-11 in N2	d1	r4	../d1_r4_irlds/LRB423_d1_r4/Snap-318-Image Export-143.tif	2	TRUE	826.261
LRB423	irld-11 in N2	d1	r4	../d1_r4_irlds/LRB423_d1_r4/Snap-318-Image Export-143.tif	3	TRUE	792.86
LRB423	irld-11 in N2	d1	r4	../d1_r4_irlds/LRB423_d1_r4/Snap-318-Image Export-143.tif	5	TRUE	832.512
LRB423	irld-11 in N2	d1	r4	../d1_r4_irlds/LRB423_d1_r4/Snap-286-Image Export-111.tif	0	TRUE	798.667
LRB423	irld-11 in N2	d1	r4	../d1_r4_irlds/LRB423_d1_r4/Snap-255-Image Export-80.tif	0	TRUE	832.198
LRB423	irld-11 in N2	d1	r4	../d1_r4_irlds/LRB423_d1_r4/Snap-255-Image Export-80.tif	1	TRUE	821.397
LRB423	irld-11 in N2	d1	r4	../d1_r4_irlds/LRB423_d1_r4/Snap-255-Image Export-80.tif	2	TRUE	843.72
LRB423	irld-11 in N2	d1	r4	../d1_r4_irlds/LRB423_d1_r4/Snap-255-Image Export-80.tif	3	TRUE	826.798
LRB423	irld-11 in N2	d1	r4	../d1_r4_irlds/LRB423_d1_r4/Snap-255-Image Export-80.tif	4	TRUE	852.247
LRB423	irld-11 in N2	d1	r4	../d1_r4_irlds/LRB423_d1_r4/Snap-319-Image Export-144.tif	0	TRUE	823.894
LRB423	irld-11 in N2	d1	r4	../d1_r4_irlds/LRB423_d1_r4/Snap-319-Image Export-144.tif	1	TRUE	800.812
LRB423	irld-11 in N2	d1	r4	../d1_r4_irlds/LRB423_d1_r4/Snap-319-Image Export-144.tif	3	TRUE	798.131
LRB423	irld-11 in N2	d1	r4	../d1_r4_irlds/LRB423_d1_r4/Snap-319-Image Export-144.tif	4	TRUE	836.933
LRB423	irld-11 in N2	d1	r4	../d1_r4_irlds/LRB423_d1_r4/Snap-319-Image Export-144.tif	5	TRUE	830.72
LRB423	irld-11 in N2	d1	r4	../d1_r4_irlds/LRB423_d1_r4/Snap-321-Image Export-146.tif	0	TRUE	859.663
LRB423	irld-11 in N2	d1	r4	../d1_r4_irlds/LRB423_d1_r4/Snap-321-Image Export-146.tif	1	TRUE	855.909
LRB423	irld-11 in N2	d1	r4	../d1_r4_irlds/LRB423_d1_r4/Snap-321-Image Export-146.tif	2	TRUE	848.363
LRB423	irld-11 in N2	d1	r4	../d1_r4_irlds/LRB423_d1_r4/Snap-256-Image Export-81.tif	1	TRUE	752.411
LRB423	irld-11 in N2	d1	r4	../d1_r4_irlds/LRB423_d1_r4/Snap-256-Image Export-81.tif	2	TRUE	830.367
LRB423	irld-11 in N2	d1	r4	../d1_r4_irlds/LRB423_d1_r4/Snap-256-Image Export-81.tif	4	TRUE	848.991
LRB423	irld-11 in N2	d1	r4	../d1_r4_irlds/LRB423_d1_r4/Snap-253-Image Export-78.tif	0	TRUE	798.759
LRB423	irld-11 in N2	d1	r4	../d1_r4_irlds/LRB423_d1_r4/Snap-253-Image Export-78.tif	1	TRUE	824.43
LRB423	irld-11 in N2	d1	r4	../d1_r4_irlds/LRB423_d1_r4/Snap-296-Image Export-121.tif	0	TRUE	818.937
LRB423	irld-11 in N2	d1	r4	../d1_r4_irlds/LRB423_d1_r4/Snap-296-Image Export-121.tif	2	TRUE	805.416
LRB423	irld-11 in N2	d1	r4	../d1_r4_irlds/LRB423_d1_r4/Snap-296-Image Export-121.tif	3	TRUE	832.827
LRB423	irld-11 in N2	d1	r4	../d1_r4_irlds/LRB423_d1_r4/Snap-296-Image Export-121.tif	5	TRUE	818.493
LRB423	irld-11 in N2	d1	r4	../d1_r4_irlds/LRB423_d1_r4/Snap-290-Image Export-115.tif	0	TRUE	828.092
LRB423	irld-11 in N2	d1	r4	../d1_r4_irlds/LRB423_d1_r4/Snap-290-Image Export-115.tif	1	TRUE	807.377
LRB423	irld-11 in N2	d1	r4	../d1_r4_irlds/LRB423_d1_r4/Snap-290-Image Export-115.tif	2	TRUE	801.256
LRB423	irld-11 in N2	d1	r4	../d1_r4_irlds/LRB423_d1_r4/Snap-254-Image Export-79.tif	0	TRUE	859.755
LRB423	irld-11 in N2	d1	r4	../d1_r4_irlds/LRB423_d1_r4/Snap-293-Image Export-118.tif	0	TRUE	814.073
LRB423	irld-11 in N2	d1	r4	../d1_r4_irlds/LRB423_d1_r4/Snap-293-Image Export-118.tif	1	TRUE	823.358
LRB423	irld-11 in N2	d1	r4	../d1_r4_irlds/LRB423_d1_r4/Snap-293-Image Export-118.tif	6	TRUE	822.691
LRB423	irld-11 in N2	d1	r4	../d1_r4_irlds/LRB423_d1_r4/Snap-293-Image Export-118.tif	7	TRUE	830.904
LRB423	irld-11 in N2	d1	r4	../d1_r4_irlds/LRB423_d1_r4/Snap-316-Image Export-141.tif	0	TRUE	808.45
LRB423	irld-11 in N2	d1	r4	../d1_r4_irlds/LRB423_d1_r4/Snap-316-Image Export-141.tif	1	TRUE	824.078
LRB423	irld-11 in N2	d1	r4	../d1_r4_irlds/LRB423_d1_r4/Snap-316-Image Export-141.tif	2	TRUE	796.928
LRB423	irld-11 in N2	d1	r4	../d1_r4_irlds/LRB423_d1_r4/Snap-284-Image Export-109.tif	0	TRUE	455.66
LRB423	irld-11 in N2	d1	r4	../d1_r4_irlds/LRB423_d1_r4/Snap-284-Image Export-109.tif	1	TRUE	769.149
LRB423	irld-11 in N2	d1	r4	../d1_r4_irlds/LRB423_d1_r4/Snap-303-Image Export-128.tif	0	TRUE	826.89
LRB423	irld-11 in N2	d1	r4	../d1_r4_irlds/LRB423_d1_r4/Snap-303-Image Export-128.tif	1	TRUE	825.595
LRB423	irld-11 in N2	d1	r4	../d1_r4_irlds/LRB423_d1_r4/Snap-303-Image Export-128.tif	2	TRUE	788.624
LRB423	irld-11 in N2	d1	r4	../d1_r4_irlds/LRB423_d1_r4/Snap-303-Image Export-128.tif	3	TRUE	838.764
LRB423	irld-11 in N2	d1	r4	../d1_r4_irlds/LRB423_d1_r4/Snap-314-Image Export-139.tif	0	TRUE	791.343
LRB423	irld-11 in N2	d1	r4	../d1_r4_irlds/LRB423_d1_r4/Snap-314-Image Export-139.tif	1	TRUE	799.517
LRB423	irld-11 in N2	d1	r4	../d1_r4_irlds/LRB423_d1_r4/Snap-314-Image Export-139.tif	2	TRUE	807.822
LRB423	irld-11 in N2	d1	r4	../d1_r4_irlds/LRB423_d1_r4/Snap-314-Image Export-139.tif	3	TRUE	847.957
LRB423	irld-11 in N2	d1	r4	../d1_r4_irlds/LRB423_d1_r4/Snap-314-Image Export-139.tif	4	TRUE	801.348
LRB423	irld-11 in N2	d1	r4	../d1_r4_irlds/LRB423_d1_r4/Snap-305-Image Export-130.tif	0	TRUE	441.548
LRB423	irld-11 in N2	d1	r4	../d1_r4_irlds/LRB423_d1_r4/Snap-305-Image Export-130.tif	1	TRUE	814.831
LRB423	irld-11 in N2	d1	r4	../d1_r4_irlds/LRB423_d1_r4/Snap-288-Image Export-113.tif	0	TRUE	806.933
LRB423	irld-11 in N2	d1	r4	../d1_r4_irlds/LRB423_d1_r4/Snap-288-Image Export-113.tif	1	TRUE	772.237
LRB423	irld-11 in N2	d1	r4	../d1_r4_irlds/LRB423_d1_r4/Snap-300-Image Export-125.tif	0	TRUE	857.832
LRB423	irld-11 in N2	d1	r4	../d1_r4_irlds/LRB423_d1_r4/Snap-300-Image Export-125.tif	1	TRUE	720.082
LRB423	irld-11 in N2	d1	r4	../d1_r4_irlds/LRB423_d1_r4/Snap-299-Image Export-124.tif	0	TRUE	817.957
LRB423	irld-11 in N2	d1	r4	../d1_r4_irlds/LRB423_d1_r4/Snap-299-Image Export-124.tif	1	TRUE	827.296
LRB423	irld-11 in N2	d1	r4	../d1_r4_irlds/LRB423_d1_r4/Snap-282-Image Export-107.tif	0	TRUE	834.658
LRB423	irld-11 in N2	d1	r4	../d1_r4_irlds/LRB423_d1_r4/Snap-264-Image Export-89.tif	0	TRUE	822.155
LRB423	irld-11 in N2	d1	r4	../d1_r4_irlds/LRB423_d1_r4/Snap-264-Image Export-89.tif	1	TRUE	821.749
LRB423	irld-11 in N2	d1	r4	../d1_r4_irlds/LRB423_d1_r4/Snap-264-Image Export-89.tif	2	TRUE	814.923
LRB423	irld-11 in N2	d1	r4	../d1_r4_irlds/LRB423_d1_r4/Snap-264-Image Export-89.tif	3	TRUE	787.773
LRB423	irld-11 in N2	d1	r4	../d1_r4_irlds/LRB423_d1_r4/Snap-287-Image Export-112.tif	0	TRUE	794.783
LRB423	irld-11 in N2	d1	r4	../d1_r4_irlds/LRB423_d1_r4/Snap-287-Image Export-112.tif	1	TRUE	791.971
LRB423	irld-11 in N2	d1	r4	../d1_r4_irlds/LRB423_d1_r4/Snap-287-Image Export-112.tif	2	TRUE	844.793
LRB423	irld-11 in N2	d1	r4	../d1_r4_irlds/LRB423_d1_r4/Snap-287-Image Export-112.tif	3	TRUE	847.919
LRB423	irld-11 in N2	d8	r4	../d8_r4_irlds/LRB423_d8_r4/Snap-207-Image Export-88.tif	0	TRUE	517.526
LRB423	irld-11 in N2	d8	r4	../d8_r4_irlds/LRB423_d8_r4/Snap-207-Image Export-88.tif	1	TRUE	502.479
LRB423	irld-11 in N2	d8	r4	../d8_r4_irlds/LRB423_d8_r4/Snap-183-Image Export-64.tif	0	TRUE	491.857
LRB423	irld-11 in N2	d8	r4	../d8_r4_irlds/LRB423_d8_r4/Snap-183-Image Export-64.tif	2	TRUE	482.466
LRB423	irld-11 in N2	d8	r4	../d8_r4_irlds/LRB423_d8_r4/Snap-183-Image Export-64.tif	3	TRUE	500.525
LRB423	irld-11 in N2	d8	r4	../d8_r4_irlds/LRB423_d8_r4/Snap-184-Image Export-65.tif	2	TRUE	495.145
LRB423	irld-11 in N2	d8	r4	../d8_r4_irlds/LRB423_d8_r4/Snap-184-Image Export-65.tif	3	TRUE	633.574
LRB423	irld-11 in N2	d8	r4	../d8_r4_irlds/LRB423_d8_r4/Snap-186-Image Export-67.tif	0	TRUE	486.257
LRB423	irld-11 in N2	d8	r4	../d8_r4_irlds/LRB423_d8_r4/Snap-181-Image Export-62.tif	0	TRUE	446.365
LRB423	irld-11 in N2	d8	r4	../d8_r4_irlds/LRB423_d8_r4/Snap-181-Image Export-62.tif	1	TRUE	516.429
LRB423	irld-11 in N2	d8	r4	../d8_r4_irlds/LRB423_d8_r4/Snap-181-Image Export-62.tif	2	TRUE	502.069
LRB423	irld-11 in N2	d8	r4	../d8_r4_irlds/LRB423_d8_r4/Snap-177-Image Export-58.tif	0	TRUE	554.558
LRB423	irld-11 in N2	d8	r4	../d8_r4_irlds/LRB423_d8_r4/Snap-177-Image Export-58.tif	1	TRUE	563.994
LRB423	irld-11 in N2	d8	r4	../d8_r4_irlds/LRB423_d8_r4/Snap-177-Image Export-58.tif	2	TRUE	463.63
LRB423	irld-11 in N2	d8	r4	../d8_r4_irlds/LRB423_d8_r4/Snap-180-Image Export-61.tif	0	TRUE	367.386
LRB423	irld-11 in N2	d8	r4	../d8_r4_irlds/LRB423_d8_r4/Snap-180-Image Export-61.tif	1	TRUE	433.439
LRB423	irld-11 in N2	d8	r4	../d8_r4_irlds/LRB423_d8_r4/Snap-180-Image Export-61.tif	2	TRUE	485.334
LRB423	irld-11 in N2	d8	r4	../d8_r4_irlds/LRB423_d8_r4/Snap-185-Image Export-66.tif	0	TRUE	410.657
LRB423	irld-11 in N2	d8	r4	../d8_r4_irlds/LRB423_d8_r4/Snap-182-Image Export-63.tif	0	TRUE	417.097
LRB423	irld-11 in N2	d8	r4	../d8_r4_irlds/LRB423_d8_r4/Snap-182-Image Export-63.tif	1	TRUE	476.82
LRB423	irld-11 in N2	d8	r4	../d8_r4_irlds/LRB423_d8_r4/Snap-182-Image Export-63.tif	2	TRUE	475.798
LRB423	irld-11 in N2	d8	r4	../d8_r4_irlds/LRB423_d8_r4/Snap-196-Image Export-77.tif	0	TRUE	567.127
LRB423	irld-11 in N2	d8	r4	../d8_r4_irlds/LRB423_d8_r4/Snap-196-Image Export-77.tif	2	TRUE	429.073
LRB423	irld-11 in N2	d8	r4	../d8_r4_irlds/LRB423_d8_r4/Snap-196-Image Export-77.tif	3	TRUE	387.546
LRB423	irld-11 in N2	d8	r4	../d8_r4_irlds/LRB423_d8_r4/Snap-191-Image Export-72.tif	0	TRUE	498.671
LRB423	irld-11 in N2	d8	r4	../d8_r4_irlds/LRB423_d8_r4/Snap-178-Image Export-59.tif	0	TRUE	460.358
LRB423	irld-11 in N2	d8	r4	../d8_r4_irlds/LRB423_d8_r4/Snap-194-Image Export-75.tif	1	TRUE	580.866
LRB423	irld-11 in N2	d8	r4	../d8_r4_irlds/LRB423_d8_r4/Snap-194-Image Export-75.tif	3	TRUE	453.928
LRB423	irld-11 in N2	d8	r4	../d8_r4_irlds/LRB423_d8_r4/Snap-194-Image Export-75.tif	5	TRUE	503.412
LRB423	irld-11 in N2	d8	r4	../d8_r4_irlds/LRB423_d8_r4/Snap-195-Image Export-76.tif	0	TRUE	491.463
LRB423	irld-11 in N2	d8	r4	../d8_r4_irlds/LRB423_d8_r4/Snap-195-Image Export-76.tif	1	TRUE	467.202
LRB423	irld-11 in N2	d8	r4	../d8_r4_irlds/LRB423_d8_r4/Snap-195-Image Export-76.tif	2	TRUE	577.048
LRB423	irld-11 in N2	d8	r4	../d8_r4_irlds/LRB423_d8_r4/Snap-192-Image Export-73.tif	0	TRUE	515.498
LRB423	irld-11 in N2	d8	r4	../d8_r4_irlds/LRB423_d8_r4/Snap-192-Image Export-73.tif	1	TRUE	570.48
LRB423	irld-11 in N2	d8	r4	../d8_r4_irlds/LRB423_d8_r4/Snap-192-Image Export-73.tif	2	TRUE	475.67
LRB423	irld-11 in N2	d8	r4	../d8_r4_irlds/LRB423_d8_r4/Snap-192-Image Export-73.tif	3	TRUE	427.08
LRB423	irld-11 in N2	d8	r4	../d8_r4_irlds/LRB423_d8_r4/Snap-190-Image Export-71.tif	0	TRUE	437.896
LRB423	irld-11 in N2	d8	r4	../d8_r4_irlds/LRB423_d8_r4/Snap-190-Image Export-71.tif	1	TRUE	483.589
LRB423	irld-11 in N2	d8	r4	../d8_r4_irlds/LRB423_d8_r4/Snap-179-Image Export-60.tif	0	TRUE	489.7
LRB423	irld-11 in N2	d8	r4	../d8_r4_irlds/LRB423_d8_r4/Snap-193-Image Export-74.tif	0	TRUE	486.348
LRB423	irld-11 in N2	d8	r4	../d8_r4_irlds/LRB423_d8_r4/Snap-193-Image Export-74.tif	1	TRUE	543.532
LRB423	irld-11 in N2	d8	r4	../d8_r4_irlds/LRB423_d8_r4/Snap-193-Image Export-74.tif	2	TRUE	450.156
LRB423	irld-11 in N2	d8	r4	../d8_r4_irlds/LRB423_d8_r4/Snap-208-Image Export-89.tif	0	TRUE	443.076
LRB423	irld-11 in N2	d8	r4	../d8_r4_irlds/LRB423_d8_r4/Snap-210-Image Export-91.tif	0	TRUE	619.506
LRB423	irld-11 in N2	d8	r4	../d8_r4_irlds/LRB423_d8_r4/Snap-209-Image Export-90.tif	0	TRUE	556.166
LRB423	irld-11 in N2	d8	r4	../d8_r4_irlds/LRB423_d8_r4/Snap-209-Image Export-90.tif	1	TRUE	559.363
LRB423	irld-11 in N2	d8	r4	../d8_r4_irlds/LRB423_d8_r4/Snap-211-Image Export-92.tif	0	TRUE	450.22
LRB423	irld-11 in N2	d8	r4	../d8_r4_irlds/LRB423_d8_r4/Snap-211-Image Export-92.tif	2	TRUE	463.986
LRB423	irld-11 in N2	d8	r4	../d8_r4_irlds/LRB423_d8_r4/Snap-211-Image Export-92.tif	3	TRUE	430.352
LRB423	irld-11 in N2	d8	r4	../d8_r4_irlds/LRB423_d8_r4/Snap-197-Image Export-78.tif	1	TRUE	592.422
LRB423	irld-11 in N2	d8	r4	../d8_r4_irlds/LRB423_d8_r4/Snap-197-Image Export-78.tif	2	TRUE	517.151
LRB423	irld-11 in N2	d8	r4	../d8_r4_irlds/LRB423_d8_r4/Snap-187-Image Export-68.tif	0	TRUE	474.391
LRB423	irld-11 in N2	d8	r4	../d8_r4_irlds/LRB423_d8_r4/Snap-171-Image Export-52.tif	0	TRUE	498.361
LRB423	irld-11 in N2	d8	r4	../d8_r4_irlds/LRB423_d8_r4/Snap-203-Image Export-84.tif	0	TRUE	593.463
LRB423	irld-11 in N2	d8	r4	../d8_r4_irlds/LRB423_d8_r4/Snap-198-Image Export-79.tif	0	TRUE	589.664
LRB423	irld-11 in N2	d8	r4	../d8_r4_irlds/LRB423_d8_r4/Snap-174-Image Export-55.tif	0	TRUE	386.97
LRB423	irld-11 in N2	d8	r4	../d8_r4_irlds/LRB423_d8_r4/Snap-172-Image Export-53.tif	0	TRUE	521.189
LRB423	irld-11 in N2	d8	r4	../d8_r4_irlds/LRB423_d8_r4/Snap-175-Image Export-56.tif	0	TRUE	458.578
LRB423	irld-11 in N2	d8	r4	../d8_r4_irlds/LRB423_d8_r4/Snap-169-Image Export-50.tif	0	TRUE	503.942
LRB423	irld-11 in N2	d8	r4	../d8_r4_irlds/LRB423_d8_r4/Snap-170-Image Export-51.tif	1	TRUE	625.791
LRB423	irld-11 in N2	d8	r4	../d8_r4_irlds/LRB423_d8_r4/Snap-199-Image Export-80.tif	0	TRUE	519.005
LRB423	irld-11 in N2	d8	r4	../d8_r4_irlds/LRB423_d8_r4/Snap-200-Image Export-81.tif	0	TRUE	523.436
LRB423	irld-11 in N2	d8	r4	../d8_r4_irlds/LRB423_d8_r4/Snap-200-Image Export-81.tif	1	TRUE	528.953
LRB423	irld-11 in N2	d8	r4	../d8_r4_irlds/LRB423_d8_r4/Snap-200-Image Export-81.tif	2	TRUE	504.956
LRB423	irld-11 in N2	d8	r4	../d8_r4_irlds/LRB423_d8_r4/Snap-206-Image Export-87.tif	0	TRUE	471.394
LRB423	irld-11 in N2	d8	r4	../d8_r4_irlds/LRB423_d8_r4/Snap-206-Image Export-87.tif	2	TRUE	556.54
LRB423	irld-11 in N2	d8	r4	../d8_r4_irlds/LRB423_d8_r4/Snap-201-Image Export-82.tif	1	TRUE	490.139
LRB423	irld-11 in N2	d8	r4	../d8_r4_irlds/LRB423_d8_r4/Snap-204-Image Export-85.tif	0	TRUE	519.27
LRB423	irld-11 in N2	d1	r5	../d1_r5_irlds/LRB423_d1_r5/Snap-261-Image Export-96.tif	0	TRUE	763.082
LRB423	irld-11 in N2	d1	r5	../d1_r5_irlds/LRB423_d1_r5/Snap-261-Image Export-96.tif	1	TRUE	805.677
LRB423	irld-11 in N2	d1	r5	../d1_r5_irlds/LRB423_d1_r5/Snap-261-Image Export-96.tif	2	TRUE	786.885
LRB423	irld-11 in N2	d1	r5	../d1_r5_irlds/LRB423_d1_r5/Snap-261-Image Export-96.tif	3	TRUE	795.763
LRB423	irld-11 in N2	d1	r5	../d1_r5_irlds/LRB423_d1_r5/Snap-254-Image Export-89.tif	0	TRUE	747.676
LRB423	irld-11 in N2	d1	r5	../d1_r5_irlds/LRB423_d1_r5/Snap-254-Image Export-89.tif	1	TRUE	841.889
LRB423	irld-11 in N2	d1	r5	../d1_r5_irlds/LRB423_d1_r5/Snap-254-Image Export-89.tif	2	TRUE	728.164
LRB423	irld-11 in N2	d1	r5	../d1_r5_irlds/LRB423_d1_r5/Snap-254-Image Export-89.tif	3	TRUE	796.208
LRB423	irld-11 in N2	d1	r5	../d1_r5_irlds/LRB423_d1_r5/Snap-277-Image Export-112.tif	0	TRUE	737.319
LRB423	irld-11 in N2	d1	r5	../d1_r5_irlds/LRB423_d1_r5/Snap-277-Image Export-112.tif	1	TRUE	765.135
LRB423	irld-11 in N2	d1	r5	../d1_r5_irlds/LRB423_d1_r5/Snap-287-Image Export-122.tif	0	TRUE	625.332
LRB423	irld-11 in N2	d1	r5	../d1_r5_irlds/LRB423_d1_r5/Snap-287-Image Export-122.tif	1	TRUE	784.019
LRB423	irld-11 in N2	d1	r5	../d1_r5_irlds/LRB423_d1_r5/Snap-287-Image Export-122.tif	2	TRUE	775.715
LRB423	irld-11 in N2	d1	r5	../d1_r5_irlds/LRB423_d1_r5/Snap-287-Image Export-122.tif	3	TRUE	818.493
LRB423	irld-11 in N2	d1	r5	../d1_r5_irlds/LRB423_d1_r5/Snap-287-Image Export-122.tif	4	TRUE	822.913
LRB423	irld-11 in N2	d1	r5	../d1_r5_irlds/LRB423_d1_r5/Snap-262-Image Export-97.tif	0	TRUE	773.532
LRB423	irld-11 in N2	d1	r5	../d1_r5_irlds/LRB423_d1_r5/Snap-262-Image Export-97.tif	1	TRUE	818.179
LRB423	irld-11 in N2	d1	r5	../d1_r5_irlds/LRB423_d1_r5/Snap-262-Image Export-97.tif	2	TRUE	782.28
LRB423	irld-11 in N2	d1	r5	../d1_r5_irlds/LRB423_d1_r5/Snap-290-Image Export-125.tif	1	TRUE	717.715
LRB423	irld-11 in N2	d1	r5	../d1_r5_irlds/LRB423_d1_r5/Snap-290-Image Export-125.tif	2	TRUE	790.585
LRB423	irld-11 in N2	d1	r5	../d1_r5_irlds/LRB423_d1_r5/Snap-278-Image Export-113.tif	0	TRUE	743.792
LRB423	irld-11 in N2	d1	r5	../d1_r5_irlds/LRB423_d1_r5/Snap-278-Image Export-113.tif	1	TRUE	780.319
LRB423	irld-11 in N2	d1	r5	../d1_r5_irlds/LRB423_d1_r5/Snap-278-Image Export-113.tif	2	TRUE	802.015
LRB423	irld-11 in N2	d1	r5	../d1_r5_irlds/LRB423_d1_r5/Snap-260-Image Export-95.tif	0	TRUE	800.054
LRB423	irld-11 in N2	d1	r5	../d1_r5_irlds/LRB423_d1_r5/Snap-260-Image Export-95.tif	1	TRUE	813.092
LRB423	irld-11 in N2	d1	r5	../d1_r5_irlds/LRB423_d1_r5/Snap-288-Image Export-123.tif	0	TRUE	721.154
LRB423	irld-11 in N2	d1	r5	../d1_r5_irlds/LRB423_d1_r5/Snap-288-Image Export-123.tif	1	TRUE	719.101
LRB423	irld-11 in N2	d1	r5	../d1_r5_irlds/LRB423_d1_r5/Snap-288-Image Export-123.tif	2	TRUE	743.792
LRB423	irld-11 in N2	d1	r5	../d1_r5_irlds/LRB423_d1_r5/Snap-265-Image Export-100.tif	0	TRUE	710.705
LRB423	irld-11 in N2	d1	r5	../d1_r5_irlds/LRB423_d1_r5/Snap-265-Image Export-100.tif	1	TRUE	811.614
LRB423	irld-11 in N2	d1	r5	../d1_r5_irlds/LRB423_d1_r5/Snap-265-Image Export-100.tif	2	TRUE	704.232
LRB423	irld-11 in N2	d1	r5	../d1_r5_irlds/LRB423_d1_r5/Snap-265-Image Export-100.tif	4	TRUE	706.062
LRB423	irld-11 in N2	d1	r5	../d1_r5_irlds/LRB423_d1_r5/Snap-274-Image Export-109.tif	0	TRUE	696.333
LRB423	irld-11 in N2	d1	r5	../d1_r5_irlds/LRB423_d1_r5/Snap-274-Image Export-109.tif	1	TRUE	767.855
LRB423	irld-11 in N2	d1	r5	../d1_r5_irlds/LRB423_d1_r5/Snap-274-Image Export-109.tif	2	TRUE	805.01
LRB423	irld-11 in N2	d1	r5	../d1_r5_irlds/LRB423_d1_r5/Snap-274-Image Export-109.tif	3	TRUE	754.019
LRB423	irld-11 in N2	d1	r5	../d1_r5_irlds/LRB423_d1_r5/Snap-281-Image Export-116.tif	0	TRUE	777.86
LRB423	irld-11 in N2	d1	r5	../d1_r5_irlds/LRB423_d1_r5/Snap-307-Image Export-142.tif	0	TRUE	808.174
LRB423	irld-11 in N2	d1	r5	../d1_r5_irlds/LRB423_d1_r5/Snap-307-Image Export-142.tif	1	TRUE	772.589
LRB423	irld-11 in N2	d1	r5	../d1_r5_irlds/LRB423_d1_r5/Snap-307-Image Export-142.tif	2	TRUE	745.179
LRB423	irld-11 in N2	d1	r5	../d1_r5_irlds/LRB423_d1_r5/Snap-307-Image Export-142.tif	3	TRUE	710.039
LRB423	irld-11 in N2	d1	r5	../d1_r5_irlds/LRB423_d1_r5/Snap-307-Image Export-142.tif	4	TRUE	727.942
LRB423	irld-11 in N2	d1	r5	../d1_r5_irlds/LRB423_d1_r5/Snap-253-Image Export-88.tif	0	TRUE	802.735
LRB423	irld-11 in N2	d1	r5	../d1_r5_irlds/LRB423_d1_r5/Snap-253-Image Export-88.tif	1	TRUE	795.449
LRB423	irld-11 in N2	d1	r5	../d1_r5_irlds/LRB423_d1_r5/Snap-253-Image Export-88.tif	2	TRUE	698.739
LRB423	irld-11 in N2	d1	r5	../d1_r5_irlds/LRB423_d1_r5/Snap-253-Image Export-88.tif	3	TRUE	810.281
LRB423	irld-11 in N2	d1	r5	../d1_r5_irlds/LRB423_d1_r5/Snap-276-Image Export-111.tif	0	TRUE	823.58
LRB423	irld-11 in N2	d1	r5	../d1_r5_irlds/LRB423_d1_r5/Snap-276-Image Export-111.tif	1	TRUE	736.246
LRB423	irld-11 in N2	d1	r5	../d1_r5_irlds/LRB423_d1_r5/Snap-276-Image Export-111.tif	2	TRUE	725.353
LRB423	irld-11 in N2	d1	r5	../d1_r5_irlds/LRB423_d1_r5/Snap-286-Image Export-121.tif	1	TRUE	787.865
LRB423	irld-11 in N2	d1	r5	../d1_r5_irlds/LRB423_d1_r5/Snap-286-Image Export-121.tif	2	TRUE	820.86
LRB423	irld-11 in N2	d1	r5	../d1_r5_irlds/LRB423_d1_r5/Snap-291-Image Export-126.tif	0	TRUE	829.793
LRB423	irld-11 in N2	d1	r5	../d1_r5_irlds/LRB423_d1_r5/Snap-302-Image Export-137.tif	0	TRUE	788.754
LRB423	irld-11 in N2	d1	r5	../d1_r5_irlds/LRB423_d1_r5/Snap-302-Image Export-137.tif	1	TRUE	778.488
LRB423	irld-11 in N2	d1	r5	../d1_r5_irlds/LRB423_d1_r5/Snap-242-Image Export-77.tif	0	TRUE	706.154
LRB423	irld-11 in N2	d1	r5	../d1_r5_irlds/LRB423_d1_r5/Snap-242-Image Export-77.tif	1	TRUE	810.947
LRB423	irld-11 in N2	d1	r5	../d1_r5_irlds/LRB423_d1_r5/Snap-289-Image Export-124.tif	0	TRUE	685.164
LRB423	irld-11 in N2	d1	r5	../d1_r5_irlds/LRB423_d1_r5/Snap-289-Image Export-124.tif	1	TRUE	779.691
LRB423	irld-11 in N2	d1	r5	../d1_r5_irlds/LRB423_d1_r5/Snap-289-Image Export-124.tif	2	TRUE	816.57
LRB423	irld-11 in N2	d1	r5	../d1_r5_irlds/LRB423_d1_r5/Snap-289-Image Export-124.tif	3	TRUE	721.469
LRB423	irld-11 in N2	d1	r5	../d1_r5_irlds/LRB423_d1_r5/Snap-240-Image Export-75.tif	0	TRUE	739.058
LRB423	irld-11 in N2	d1	r5	../d1_r5_irlds/LRB423_d1_r5/Snap-240-Image Export-75.tif	1	TRUE	699.589
LRB423	irld-11 in N2	d1	r5	../d1_r5_irlds/LRB423_d1_r5/Snap-283-Image Export-118.tif	0	TRUE	729.459
LRB423	irld-11 in N2	d1	r5	../d1_r5_irlds/LRB423_d1_r5/Snap-283-Image Export-118.tif	2	TRUE	692.579
LRB423	irld-11 in N2	d1	r5	../d1_r5_irlds/LRB423_d1_r5/Snap-283-Image Export-118.tif	3	TRUE	727.72
LRB423	irld-11 in N2	d1	r5	../d1_r5_irlds/LRB423_d1_r5/Snap-241-Image Export-76.tif	0	TRUE	812.372
LRB423	irld-11 in N2	d1	r5	../d1_r5_irlds/LRB423_d1_r5/Snap-241-Image Export-76.tif	1	TRUE	815.015
LRB423	irld-11 in N2	d1	r5	../d1_r5_irlds/LRB423_d1_r5/Snap-241-Image Export-76.tif	2	TRUE	783.131
LRB423	irld-11 in N2	d1	r5	../d1_r5_irlds/LRB423_d1_r5/Snap-306-Image Export-141.tif	2	TRUE	761.159
LRB423	irld-11 in N2	d1	r5	../d1_r5_irlds/LRB423_d1_r5/Snap-306-Image Export-141.tif	3	TRUE	807.063
LRB423	irld-11 in N2	d1	r5	../d1_r5_irlds/LRB423_d1_r5/Snap-306-Image Export-141.tif	4	TRUE	785.942
LRB423	irld-11 in N2	d1	r5	../d1_r5_irlds/LRB423_d1_r5/Snap-306-Image Export-141.tif	6	TRUE	745.401
LRB423	irld-11 in N2	d1	r5	../d1_r5_irlds/LRB423_d1_r5/Snap-306-Image Export-141.tif	7	TRUE	824.078
LRB423	irld-11 in N2	d1	r5	../d1_r5_irlds/LRB423_d1_r5/Snap-280-Image Export-115.tif	0	TRUE	686.642
LRB423	irld-11 in N2	d1	r5	../d1_r5_irlds/LRB423_d1_r5/Snap-280-Image Export-115.tif	1	TRUE	759.642
LRB423	irld-11 in N2	d1	r5	../d1_r5_irlds/LRB423_d1_r5/Snap-304-Image Export-139.tif	0	TRUE	800.498
LRB423	irld-11 in N2	d1	r5	../d1_r5_irlds/LRB423_d1_r5/Snap-304-Image Export-139.tif	1	TRUE	811.261
LRB423	irld-11 in N2	d1	r5	../d1_r5_irlds/LRB423_d1_r5/Snap-304-Image Export-139.tif	2	TRUE	709.632
LRB423	irld-11 in N2	d1	r5	../d1_r5_irlds/LRB423_d1_r5/Snap-304-Image Export-139.tif	3	TRUE	794.318
LRB423	irld-11 in N2	d1	r5	../d1_r5_irlds/LRB423_d1_r5/Snap-243-Image Export-78.tif	0	TRUE	816.034
LRB423	irld-11 in N2	d1	r5	../d1_r5_irlds/LRB423_d1_r5/Snap-243-Image Export-78.tif	1	TRUE	820.324
LRB423	irld-11 in N2	d1	r5	../d1_r5_irlds/LRB423_d1_r5/Snap-239-Image Export-74.tif	0	TRUE	782.686
LRB423	irld-11 in N2	d1	r5	../d1_r5_irlds/LRB423_d1_r5/Snap-301-Image Export-136.tif	0	TRUE	758.126
LRB423	irld-11 in N2	d1	r5	../d1_r5_irlds/LRB423_d1_r5/Snap-301-Image Export-136.tif	2	TRUE	786.793
LRB423	irld-11 in N2	d1	r5	../d1_r5_irlds/LRB423_d1_r5/Snap-247-Image Export-82.tif	0	TRUE	842.426
LRB423	irld-11 in N2	d1	r5	../d1_r5_irlds/LRB423_d1_r5/Snap-247-Image Export-82.tif	1	TRUE	796.169
LRB423	irld-11 in N2	d1	r5	../d1_r5_irlds/LRB423_d1_r5/Snap-247-Image Export-82.tif	2	TRUE	792.377
LRB423	irld-11 in N2	d1	r5	../d1_r5_irlds/LRB423_d1_r5/Snap-247-Image Export-82.tif	3	TRUE	808.802
LRB423	irld-11 in N2	d1	r5	../d1_r5_irlds/LRB423_d1_r5/Snap-258-Image Export-93.tif	0	TRUE	713.831
LRB423	irld-11 in N2	d1	r5	../d1_r5_irlds/LRB423_d1_r5/Snap-258-Image Export-93.tif	1	TRUE	821.083
LRB423	irld-11 in N2	d1	r5	../d1_r5_irlds/LRB423_d1_r5/Snap-258-Image Export-93.tif	2	TRUE	802.421
LRB423	irld-11 in N2	d1	r5	../d1_r5_irlds/LRB423_d1_r5/Snap-245-Image Export-80.tif	0	TRUE	845.865
LRB423	irld-11 in N2	d1	r5	../d1_r5_irlds/LRB423_d1_r5/Snap-245-Image Export-80.tif	2	TRUE	807.247
LRB423	irld-11 in N2	d1	r5	../d1_r5_irlds/LRB423_d1_r5/Snap-292-Image Export-127.tif	0	TRUE	795.411
LRB423	irld-11 in N2	d1	r5	../d1_r5_irlds/LRB423_d1_r5/Snap-292-Image Export-127.tif	1	TRUE	791.121
LRB423	irld-11 in N2	d1	r5	../d1_r5_irlds/LRB423_d1_r5/Snap-267-Image Export-102.tif	0	TRUE	788.624
LRB423	irld-11 in N2	d1	r5	../d1_r5_irlds/LRB423_d1_r5/Snap-267-Image Export-102.tif	2	TRUE	819.029
LRB423	irld-11 in N2	d1	r5	../d1_r5_irlds/LRB423_d1_r5/Snap-267-Image Export-102.tif	3	TRUE	791.657
LRB423	irld-11 in N2	d1	r5	../d1_r5_irlds/LRB423_d1_r5/Snap-267-Image Export-102.tif	5	TRUE	852.117
LRB423	irld-11 in N2	d1	r5	../d1_r5_irlds/LRB423_d1_r5/Snap-270-Image Export-105.tif	0	TRUE	782.926
LRB423	irld-11 in N2	d1	r5	../d1_r5_irlds/LRB423_d1_r5/Snap-273-Image Export-108.tif	0	TRUE	759.198
LRB423	irld-11 in N2	d1	r5	../d1_r5_irlds/LRB423_d1_r5/Snap-273-Image Export-108.tif	1	TRUE	749.729
LRB423	irld-11 in N2	d1	r5	../d1_r5_irlds/LRB423_d1_r5/Snap-273-Image Export-108.tif	2	TRUE	799.609
LRB423	irld-11 in N2	d1	r5	../d1_r5_irlds/LRB423_d1_r5/Snap-244-Image Export-79.tif	1	TRUE	758.034
LRB423	irld-11 in N2	d1	r5	../d1_r5_irlds/LRB423_d1_r5/Snap-244-Image Export-79.tif	2	TRUE	724.28
LRB423	irld-11 in N2	d1	r5	../d1_r5_irlds/LRB423_d1_r5/Snap-244-Image Export-79.tif	3	TRUE	803.938
LRB423	irld-11 in N2	d1	r5	../d1_r5_irlds/LRB423_d1_r5/Snap-244-Image Export-79.tif	4	TRUE	813.13
LRB423	irld-11 in N2	d1	r5	../d1_r5_irlds/LRB423_d1_r5/Snap-275-Image Export-110.tif	0	TRUE	804.696
LRB423	irld-11 in N2	d1	r5	../d1_r5_irlds/LRB423_d1_r5/Snap-275-Image Export-110.tif	1	TRUE	801.126
LRB423	irld-11 in N2	d1	r5	../d1_r5_irlds/LRB423_d1_r5/Snap-298-Image Export-133.tif	0	TRUE	722.043
LRB423	irld-11 in N2	d1	r5	../d1_r5_irlds/LRB423_d1_r5/Snap-298-Image Export-133.tif	1	TRUE	756.81
LRB423	irld-11 in N2	d1	r5	../d1_r5_irlds/LRB423_d1_r5/Snap-238-Image Export-73.tif	0	TRUE	721.154
LRB423	irld-11 in N2	d1	r5	../d1_r5_irlds/LRB423_d1_r5/Snap-294-Image Export-129.tif	0	TRUE	790.27
LRB423	irld-11 in N2	d1	r5	../d1_r5_irlds/LRB423_d1_r5/Snap-294-Image Export-129.tif	1	TRUE	723.522
LRB423	irld-11 in N2	d1	r5	../d1_r5_irlds/LRB423_d1_r5/Snap-294-Image Export-129.tif	2	TRUE	786.478
LRB423	irld-11 in N2	d1	r5	../d1_r5_irlds/LRB423_d1_r5/Snap-294-Image Export-129.tif	3	TRUE	799.962
LRB423	irld-11 in N2	d1	r5	../d1_r5_irlds/LRB423_d1_r5/Snap-285-Image Export-120.tif	0	TRUE	769.426
LRB423	irld-11 in N2	d1	r5	../d1_r5_irlds/LRB423_d1_r5/Snap-285-Image Export-120.tif	1	TRUE	747.676
LRB423	irld-11 in N2	d1	r5	../d1_r5_irlds/LRB423_d1_r5/Snap-285-Image Export-120.tif	2	TRUE	778.933
LRB423	irld-11 in N2	d1	r5	../d1_r5_irlds/LRB423_d1_r5/Snap-285-Image Export-120.tif	3	TRUE	722.227
LRB423	irld-11 in N2	d1	r5	../d1_r5_irlds/LRB423_d1_r5/Snap-268-Image Export-103.tif	0	TRUE	780.227
LRB423	irld-11 in N2	d1	r5	../d1_r5_irlds/LRB423_d1_r5/Snap-268-Image Export-103.tif	1	TRUE	810.097
LRB423	irld-11 in N2	d1	r5	../d1_r5_irlds/LRB423_d1_r5/Snap-268-Image Export-103.tif	2	TRUE	725.261
LRB423	irld-11 in N2	d1	r5	../d1_r5_irlds/LRB423_d1_r5/Snap-268-Image Export-103.tif	3	TRUE	802.107
LRB423	irld-11 in N2	d1	r5	../d1_r5_irlds/LRB423_d1_r5/Snap-259-Image Export-94.tif	0	TRUE	821.619
LRB423	irld-11 in N2	d1	r5	../d1_r5_irlds/LRB423_d1_r5/Snap-259-Image Export-94.tif	1	TRUE	716.642
LRB423	irld-11 in N2	d1	r5	../d1_r5_irlds/LRB423_d1_r5/Snap-259-Image Export-94.tif	2	TRUE	722.633
LRB423	irld-11 in N2	d1	r5	../d1_r5_irlds/LRB423_d1_r5/Snap-251-Image Export-86.tif	0	TRUE	774.956
LRB423	irld-11 in N2	d1	r5	../d1_r5_irlds/LRB423_d1_r5/Snap-251-Image Export-86.tif	1	TRUE	790.048
LRB423	irld-11 in N2	d1	r5	../d1_r5_irlds/LRB423_d1_r5/Snap-251-Image Export-86.tif	2	TRUE	792.324
LRB423	irld-11 in N2	d1	r5	../d1_r5_irlds/LRB423_d1_r5/Snap-264-Image Export-99.tif	0	TRUE	770.092
LRB423	irld-11 in N2	d1	r5	../d1_r5_irlds/LRB423_d1_r5/Snap-264-Image Export-99.tif	1	TRUE	795.633
LRB423	irld-11 in N2	d1	r5	../d1_r5_irlds/LRB423_d1_r5/Snap-264-Image Export-99.tif	2	TRUE	801.884
LRB423	irld-11 in N2	d1	r5	../d1_r5_irlds/LRB423_d1_r5/Snap-264-Image Export-99.tif	3	TRUE	799.517
LRB423	irld-11 in N2	d1	r5	../d1_r5_irlds/LRB423_d1_r5/Snap-282-Image Export-117.tif	0	TRUE	789.068
LRB423	irld-11 in N2	d1	r5	../d1_r5_irlds/LRB423_d1_r5/Snap-282-Image Export-117.tif	1	TRUE	810.817
LRB423	irld-11 in N2	d1	r5	../d1_r5_irlds/LRB423_d1_r5/Snap-282-Image Export-117.tif	2	TRUE	757.812
LRB423	irld-11 in N2	d1	r5	../d1_r5_irlds/LRB423_d1_r5/Snap-282-Image Export-117.tif	3	TRUE	787.551
LRB423	irld-11 in N2	d1	r5	../d1_r5_irlds/LRB423_d1_r5/Snap-282-Image Export-117.tif	4	TRUE	729.903
LRB423	irld-11 in N2	d1	r5	../d1_r5_irlds/LRB423_d1_r5/Snap-299-Image Export-134.tif	0	TRUE	724.41
LRB423	irld-11 in N2	d1	r5	../d1_r5_irlds/LRB423_d1_r5/Snap-299-Image Export-134.tif	2	TRUE	761.88
LRB423	irld-11 in N2	d1	r5	../d1_r5_irlds/LRB423_d1_r5/Snap-299-Image Export-134.tif	3	TRUE	785.498
LRB423	irld-11 in N2	d1	r5	../d1_r5_irlds/LRB423_d1_r5/Snap-300-Image Export-135.tif	0	TRUE	770.942
LRB423	irld-11 in N2	d1	r5	../d1_r5_irlds/LRB423_d1_r5/Snap-300-Image Export-135.tif	1	TRUE	798.537
LRB423	irld-11 in N2	d1	r5	../d1_r5_irlds/LRB423_d1_r5/Snap-252-Image Export-87.tif	0	TRUE	825.503
LRB423	irld-11 in N2	d1	r5	../d1_r5_irlds/LRB423_d1_r5/Snap-252-Image Export-87.tif	1	TRUE	800.498
LRB423	irld-11 in N2	d1	r5	../d1_r5_irlds/LRB423_d1_r5/Snap-252-Image Export-87.tif	2	TRUE	826.982
LRB423	irld-11 in N2	d1	r5	../d1_r5_irlds/LRB423_d1_r5/Snap-252-Image Export-87.tif	3	TRUE	818.623
LRB423	irld-11 in N2	d1	r5	../d1_r5_irlds/LRB423_d1_r5/Snap-303-Image Export-138.tif	0	TRUE	787.865
LRB423	irld-11 in N2	d1	r5	../d1_r5_irlds/LRB423_d1_r5/Snap-303-Image Export-138.tif	1	TRUE	760.309
LRB423	irld-11 in N2	d1	r5	../d1_r5_irlds/LRB423_d1_r5/Snap-303-Image Export-138.tif	2	TRUE	787.643
LRB423	irld-11 in N2	d1	r5	../d1_r5_irlds/LRB423_d1_r5/Snap-303-Image Export-138.tif	3	TRUE	714.551
LRB423	irld-11 in N2	d1	r5	../d1_r5_irlds/LRB423_d1_r5/Snap-303-Image Export-138.tif	4	TRUE	793.932
LRB423	irld-11 in N2	d1	r5	../d1_r5_irlds/LRB423_d1_r5/Snap-303-Image Export-138.tif	5	TRUE	783.667
LRB423	irld-11 in N2	d1	r5	../d1_r5_irlds/LRB423_d1_r5/Snap-249-Image Export-84.tif	1	TRUE	811.89
LRB423	irld-11 in N2	d1	r5	../d1_r5_irlds/LRB423_d1_r5/Snap-284-Image Export-119.tif	0	TRUE	744.236
LRB423	irld-11 in N2	d1	r5	../d1_r5_irlds/LRB423_d1_r5/Snap-284-Image Export-119.tif	1	TRUE	804.252
LRB423	irld-11 in N2	d1	r5	../d1_r5_irlds/LRB423_d1_r5/Snap-235-Image Export-70.tif	0	TRUE	769.556
LRB423	irld-11 in N2	d1	r5	../d1_r5_irlds/LRB423_d1_r5/Snap-235-Image Export-70.tif	1	TRUE	798.223
LRB423	irld-11 in N2	d1	r5	../d1_r5_irlds/LRB423_d1_r5/Snap-250-Image Export-85.tif	0	TRUE	766.522
LRB423	irld-11 in N2	d1	r5	../d1_r5_irlds/LRB423_d1_r5/Snap-250-Image Export-85.tif	1	TRUE	711.333
LRB423	irld-11 in N2	d1	r5	../d1_r5_irlds/LRB423_d1_r5/Snap-296-Image Export-131.tif	1	TRUE	792.101
LRB423	irld-11 in N2	d1	r5	../d1_r5_irlds/LRB423_d1_r5/Snap-296-Image Export-131.tif	2	TRUE	790.899
LRB423	irld-11 in N2	d1	r5	../d1_r5_irlds/LRB423_d1_r5/Snap-296-Image Export-131.tif	3	TRUE	760.937
LRB423	irld-11 in N2	d1	r5	../d1_r5_irlds/LRB423_d1_r5/Snap-296-Image Export-131.tif	4	TRUE	769.556
LRB423	irld-11 in N2	d1	r5	../d1_r5_irlds/LRB423_d1_r5/Snap-256-Image Export-91.tif	0	TRUE	753.391
LRB423	irld-11 in N2	d1	r5	../d1_r5_irlds/LRB423_d1_r5/Snap-256-Image Export-91.tif	1	TRUE	706.783
LRB423	irld-11 in N2	d1	r5	../d1_r5_irlds/LRB423_d1_r5/Snap-256-Image Export-91.tif	2	TRUE	762.86
LRB423	irld-11 in N2	d1	r5	../d1_r5_irlds/LRB423_d1_r5/Snap-256-Image Export-91.tif	3	TRUE	694.541
LRB423	irld-11 in N2	d1	r5	../d1_r5_irlds/LRB423_d1_r5/Snap-266-Image Export-101.tif	0	TRUE	605.154
LRB423	irld-11 in N2	d1	r5	../d1_r5_irlds/LRB423_d1_r5/Snap-266-Image Export-101.tif	1	TRUE	739.502
LRB423	irld-11 in N2	d1	r5	../d1_r5_irlds/LRB423_d1_r5/Snap-271-Image Export-106.tif	0	TRUE	790.991
LRB423	irld-11 in N2	d1	r5	../d1_r5_irlds/LRB423_d1_r5/Snap-271-Image Export-106.tif	1	TRUE	800.812
LRB423	irld-11 in N2	d1	r5	../d1_r5_irlds/LRB423_d1_r5/Snap-271-Image Export-106.tif	2	TRUE	792.508
LRB423	irld-11 in N2	d1	r5	../d1_r5_irlds/LRB423_d1_r5/Snap-255-Image Export-90.tif	2	TRUE	668.333
LRB423	irld-11 in N2	d1	r5	../d1_r5_irlds/LRB423_d1_r5/Snap-255-Image Export-90.tif	3	TRUE	784.555
LRB423	irld-11 in N2	d1	r5	../d1_r5_irlds/LRB423_d1_r5/Snap-255-Image Export-90.tif	4	TRUE	800.498
LRB423	irld-11 in N2	d1	r5	../d1_r5_irlds/LRB423_d1_r5/Snap-263-Image Export-98.tif	0	TRUE	784.387
LRB423	irld-11 in N2	d1	r5	../d1_r5_irlds/LRB423_d1_r5/Snap-263-Image Export-98.tif	1	TRUE	692.579
LRB423	irld-11 in N2	d1	r5	../d1_r5_irlds/LRB423_d1_r5/Snap-263-Image Export-98.tif	2	TRUE	734.952
LRB423	irld-11 in N2	d1	r5	../d1_r5_irlds/LRB423_d1_r5/Snap-263-Image Export-98.tif	3	TRUE	762.99
LRB423	irld-11 in N2	d1	r5	../d1_r5_irlds/LRB423_d1_r5/Snap-257-Image Export-92.tif	0	TRUE	771.387
LRB423	irld-11 in N2	d1	r5	../d1_r5_irlds/LRB423_d1_r5/Snap-257-Image Export-92.tif	1	TRUE	726.019
LRB423	irld-11 in N2	d1	r5	../d1_r5_irlds/LRB423_d1_r5/Snap-257-Image Export-92.tif	2	TRUE	784.74
LRB423	irld-11 in N2	d1	r5	../d1_r5_irlds/LRB423_d1_r5/Snap-257-Image Export-92.tif	3	TRUE	789.826
LRB423	irld-11 in N2	d1	r5	../d1_r5_irlds/LRB423_d1_r5/Snap-257-Image Export-92.tif	4	TRUE	775.493
LRB423	irld-11 in N2	d1	r5	../d1_r5_irlds/LRB423_d1_r5/Snap-257-Image Export-92.tif	5	TRUE	746.604
LRB423	irld-11 in N2	d8	r5	../d8_r5_irlds/LRB423_d8_r5/Snap-891-Image Export-46.tif	0	TRUE	502.224
LRB423	irld-11 in N2	d8	r5	../d8_r5_irlds/LRB423_d8_r5/Snap-891-Image Export-46.tif	1	TRUE	432.644
LRB423	irld-11 in N2	d8	r5	../d8_r5_irlds/LRB423_d8_r5/Snap-913-Image Export-68.tif	0	TRUE	538.17
LRB423	irld-11 in N2	d8	r5	../d8_r5_irlds/LRB423_d8_r5/Snap-913-Image Export-68.tif	1	TRUE	455.317
LRB423	irld-11 in N2	d8	r5	../d8_r5_irlds/LRB423_d8_r5/Snap-913-Image Export-68.tif	2	TRUE	515.744
LRB423	irld-11 in N2	d8	r5	../d8_r5_irlds/LRB423_d8_r5/Snap-890-Image Export-45.tif	1	TRUE	466.672
LRB423	irld-11 in N2	d8	r5	../d8_r5_irlds/LRB423_d8_r5/Snap-890-Image Export-45.tif	2	TRUE	492.807
LRB423	irld-11 in N2	d8	r5	../d8_r5_irlds/LRB423_d8_r5/Snap-890-Image Export-45.tif	3	TRUE	495.884
LRB423	irld-11 in N2	d8	r5	../d8_r5_irlds/LRB423_d8_r5/Snap-889-Image Export-44.tif	0	TRUE	480.456
LRB423	irld-11 in N2	d8	r5	../d8_r5_irlds/LRB423_d8_r5/Snap-889-Image Export-44.tif	1	TRUE	521.124
LRB423	irld-11 in N2	d8	r5	../d8_r5_irlds/LRB423_d8_r5/Snap-889-Image Export-44.tif	2	TRUE	486.832
LRB423	irld-11 in N2	d8	r5	../d8_r5_irlds/LRB423_d8_r5/Snap-921-Image Export-76.tif	0	TRUE	385.408
LRB423	irld-11 in N2	d8	r5	../d8_r5_irlds/LRB423_d8_r5/Snap-914-Image Export-69.tif	0	TRUE	603.887
LRB423	irld-11 in N2	d8	r5	../d8_r5_irlds/LRB423_d8_r5/Snap-896-Image Export-51.tif	0	TRUE	493.007
LRB423	irld-11 in N2	d8	r5	../d8_r5_irlds/LRB423_d8_r5/Snap-896-Image Export-51.tif	1	TRUE	421.079
LRB423	irld-11 in N2	d8	r5	../d8_r5_irlds/LRB423_d8_r5/Snap-896-Image Export-51.tif	2	TRUE	454.413
LRB423	irld-11 in N2	d8	r5	../d8_r5_irlds/LRB423_d8_r5/Snap-920-Image Export-75.tif	0	TRUE	446.429
LRB423	irld-11 in N2	d8	r5	../d8_r5_irlds/LRB423_d8_r5/Snap-922-Image Export-77.tif	0	TRUE	478.474
LRB423	irld-11 in N2	d8	r5	../d8_r5_irlds/LRB423_d8_r5/Snap-895-Image Export-50.tif	0	TRUE	578.509
LRB423	irld-11 in N2	d8	r5	../d8_r5_irlds/LRB423_d8_r5/Snap-895-Image Export-50.tif	1	TRUE	625.481
LRB423	irld-11 in N2	d8	r5	../d8_r5_irlds/LRB423_d8_r5/Snap-901-Image Export-56.tif	0	TRUE	605.631
LRB423	irld-11 in N2	d8	r5	../d8_r5_irlds/LRB423_d8_r5/Snap-901-Image Export-56.tif	1	TRUE	580.647
LRB423	irld-11 in N2	d8	r5	../d8_r5_irlds/LRB423_d8_r5/Snap-901-Image Export-56.tif	2	TRUE	471.943
LRB423	irld-11 in N2	d8	r5	../d8_r5_irlds/LRB423_d8_r5/Snap-901-Image Export-56.tif	4	TRUE	463.081
LRB423	irld-11 in N2	d8	r5	../d8_r5_irlds/LRB423_d8_r5/Snap-900-Image Export-55.tif	0	TRUE	361.037
LRB423	irld-11 in N2	d8	r5	../d8_r5_irlds/LRB423_d8_r5/Snap-902-Image Export-57.tif	0	TRUE	474.062
LRB423	irld-11 in N2	d8	r5	../d8_r5_irlds/LRB423_d8_r5/Snap-902-Image Export-57.tif	1	TRUE	456.176
LRB423	irld-11 in N2	d8	r5	../d8_r5_irlds/LRB423_d8_r5/Snap-902-Image Export-57.tif	2	TRUE	557.49
LRB423	irld-11 in N2	d8	r5	../d8_r5_irlds/LRB423_d8_r5/Snap-902-Image Export-57.tif	4	TRUE	528.908
LRB423	irld-11 in N2	d8	r5	../d8_r5_irlds/LRB423_d8_r5/Snap-933-Image Export-88.tif	1	TRUE	411.716
LRB423	irld-11 in N2	d8	r5	../d8_r5_irlds/LRB423_d8_r5/Snap-933-Image Export-88.tif	2	TRUE	481.561
LRB423	irld-11 in N2	d8	r5	../d8_r5_irlds/LRB423_d8_r5/Snap-899-Image Export-54.tif	1	TRUE	416.832
LRB423	irld-11 in N2	d8	r5	../d8_r5_irlds/LRB423_d8_r5/Snap-930-Image Export-85.tif	0	TRUE	511.597
LRB423	irld-11 in N2	d8	r5	../d8_r5_irlds/LRB423_d8_r5/Snap-930-Image Export-85.tif	1	TRUE	455.737
LRB423	irld-11 in N2	d8	r5	../d8_r5_irlds/LRB423_d8_r5/Snap-930-Image Export-85.tif	2	TRUE	486.412
LRB423	irld-11 in N2	d8	r5	../d8_r5_irlds/LRB423_d8_r5/Snap-930-Image Export-85.tif	3	TRUE	320.569
LRB423	irld-11 in N2	d8	r5	../d8_r5_irlds/LRB423_d8_r5/Snap-904-Image Export-59.tif	0	TRUE	514.904
LRB423	irld-11 in N2	d8	r5	../d8_r5_irlds/LRB423_d8_r5/Snap-904-Image Export-59.tif	2	TRUE	430.022
LRB423	irld-11 in N2	d8	r5	../d8_r5_irlds/LRB423_d8_r5/Snap-904-Image Export-59.tif	3	TRUE	447.991
LRB423	irld-11 in N2	d8	r5	../d8_r5_irlds/LRB423_d8_r5/Snap-932-Image Export-87.tif	1	TRUE	482.886
LRB423	irld-11 in N2	d8	r5	../d8_r5_irlds/LRB423_d8_r5/Snap-932-Image Export-87.tif	2	TRUE	464.16
LRB423	irld-11 in N2	d8	r5	../d8_r5_irlds/LRB423_d8_r5/Snap-929-Image Export-84.tif	2	TRUE	491.929
LRB423	irld-11 in N2	d8	r5	../d8_r5_irlds/LRB423_d8_r5/Snap-929-Image Export-84.tif	3	TRUE	448.987
LRB423	irld-11 in N2	d8	r5	../d8_r5_irlds/LRB423_d8_r5/Snap-929-Image Export-84.tif	4	TRUE	504.828
LRB423	irld-11 in N2	d8	r5	../d8_r5_irlds/LRB423_d8_r5/Snap-919-Image Export-74.tif	0	TRUE	471.723
LRB423	irld-11 in N2	d8	r5	../d8_r5_irlds/LRB423_d8_r5/Snap-931-Image Export-86.tif	0	TRUE	438.664
LRB423	irld-11 in N2	d8	r5	../d8_r5_irlds/LRB423_d8_r5/Snap-931-Image Export-86.tif	1	TRUE	483.36
LRB423	irld-11 in N2	d8	r5	../d8_r5_irlds/LRB423_d8_r5/Snap-931-Image Export-86.tif	2	TRUE	451.48
LRB423	irld-11 in N2	d8	r5	../d8_r5_irlds/LRB423_d8_r5/Snap-906-Image Export-61.tif	1	TRUE	498.936
LRB423	irld-11 in N2	d8	r5	../d8_r5_irlds/LRB423_d8_r5/Snap-928-Image Export-83.tif	1	TRUE	489.235
LRB423	irld-11 in N2	d8	r5	../d8_r5_irlds/LRB423_d8_r5/Snap-928-Image Export-83.tif	2	TRUE	484.274
LRB423	irld-11 in N2	d8	r5	../d8_r5_irlds/LRB423_d8_r5/Snap-928-Image Export-83.tif	3	TRUE	521.745
LRB423	irld-11 in N2	d8	r5	../d8_r5_irlds/LRB423_d8_r5/Snap-928-Image Export-83.tif	4	TRUE	511.487
LRB423	irld-11 in N2	d8	r5	../d8_r5_irlds/LRB423_d8_r5/Snap-928-Image Export-83.tif	5	TRUE	490.514
LRB423	irld-11 in N2	d8	r5	../d8_r5_irlds/LRB423_d8_r5/Snap-903-Image Export-58.tif	0	TRUE	510.227
LRB423	irld-11 in N2	d8	r5	../d8_r5_irlds/LRB423_d8_r5/Snap-903-Image Export-58.tif	1	TRUE	482.95
LRB423	irld-11 in N2	d8	r5	../d8_r5_irlds/LRB423_d8_r5/Snap-905-Image Export-60.tif	0	TRUE	472.847
LRB423	irld-11 in N2	d8	r5	../d8_r5_irlds/LRB423_d8_r5/Snap-907-Image Export-62.tif	0	TRUE	487.381
LRB423	irld-11 in N2	d8	r5	../d8_r5_irlds/LRB423_d8_r5/Snap-925-Image Export-80.tif	0	TRUE	437.386
LRB423	irld-11 in N2	d8	r5	../d8_r5_irlds/LRB423_d8_r5/Snap-925-Image Export-80.tif	1	TRUE	414.165
LRB423	irld-11 in N2	d8	r5	../d8_r5_irlds/LRB423_d8_r5/Snap-894-Image Export-49.tif	1	TRUE	520.439
LRB423	irld-11 in N2	d8	r5	../d8_r5_irlds/LRB423_d8_r5/Snap-894-Image Export-49.tif	2	TRUE	481.141
[truncated: 3,512 more rows]
