# Supplementary material for: Using population selection and sequencing to characterize natural variation of starvation resistance in Caenorhabditis elegans
Source: eLife. 2022 Jun 21;11:e80204. doi: 10.7554/eLife.80204 (PMC9262388; doi:10.7554/eLife.80204)
Supplement: Figure 4—source data 1. — Source data for figures resulting from MIP-seq, NIL-seq, RNA-seq, or enrichment analysis is available in Supplementary files 1-3. [file elife-80204-fig4-data1.xlsx]

## Sheet: README
Source data is available on each sheet for manual phenotypic assays for survival, recovery, and early fecundity. These correspond to the figure panels below:
Fig 4A
Fig 4B
Fig 4C
Fig 4D
Fig 4E

## Sheet: Fig_4A
strain	replicate	day	Tp	Ta	prop_alive
N2	rep1	1	67	67	1
N2	rep1	3	60	56	0.933333
N2	rep1	5	63	42	0.666667
N2	rep1	7	74	61	0.824324
N2	rep1	9	59	16	0.271186
N2	rep1	11	77	15	0.194805
N2	rep1	13	73	9	0.123288
N2	rep1	15	77	0	0
irld39_52	rep1	1	89	89	1
irld39_52	rep1	3	106	103	0.971698
irld39_52	rep1	5	89	71	0.797753
irld39_52	rep1	7	113	92	0.814159
irld39_52	rep1	9	96	68	0.708333
irld39_52	rep1	11	117	75	0.641026
irld39_52	rep1	13	89	50	0.561798
irld39_52	rep1	15	86	34	0.395349
irld39_52	rep1	17	98	19	0.193878
irld39_52	rep1	19	126	15	0.119048
irld39_52	rep1	21	15	0	0
N2	rep2	1	97	92	0.948454
N2	rep2	3	119	99	0.831933
N2	rep2	5	100	97	0.97
N2	rep2	7	109	89	0.816514
N2	rep2	9	104	57	0.548077
N2	rep2	11	93	11	0.11828
N2	rep2	13	104	3	0.0288462
N2	rep2	15	115	0	0
irld39_52	rep2	1	100	99	0.99
irld39_52	rep2	3	108	102	0.944444
irld39_52	rep2	5	104	102	0.980769
irld39_52	rep2	7	102	89	0.872549
irld39_52	rep2	9	99	89	0.89899
irld39_52	rep2	11	122	63	0.516393
irld39_52	rep2	13	100	24	0.24
irld39_52	rep2	15	114	8	0.0701754
irld39_52	rep2	17	114	1	0.00877193
irld39_52	rep2	19	104	0	0
N2	rep3	1	96	95	0.989583
N2	rep3	3	123	121	0.98374
N2	rep3	5	119	109	0.915966
N2	rep3	7	109	80	0.733945
N2	rep3	9	67	44	0.656716
N2	rep3	11	133	21	0.157895
N2	rep3	13	126	8	0.0634921
N2	rep3	15	160	1	0.00625
N2	rep3	17	168	0	0
irld39_52	rep3	1	101	95	0.940594
irld39_52	rep3	3	106	106	1
irld39_52	rep3	5	114	102	0.894737
irld39_52	rep3	7	96	86	0.895833
irld39_52	rep3	9	102	46	0.45098
irld39_52	rep3	11	122	23	0.188525
irld39_52	rep3	13	106	10	0.0943396
irld39_52	rep3	15	131	0	0
N2	rep4	1	85	82	0.964706
N2	rep4	3	82	78	0.95122
N2	rep4	5	110	99	0.9
N2	rep4	7	73	65	0.890411
N2	rep4	9	96	45	0.46875
N2	rep4	11	94	18	0.191489
N2	rep4	13	107	4	0.0373832
N2	rep4	15	121
irld39_52	rep4	1	66	63	0.954545
irld39_52	rep4	3	80	77	0.9625
irld39_52	rep4	5	58	53	0.913793
irld39_52	rep4	7	78	73	0.935897
irld39_52	rep4	9	66	31	0.469697
irld39_52	rep4	11	62	7	0.112903
irld39_52	rep4	13	96	3	0.03125
N2	rep5	1	122	121	0.991803
N2	rep5	3	84	83	0.988095
N2	rep5	5	108	102	0.944444
N2	rep5	7	231	203	0.878788
N2	rep5	11	71	32	0.450704
N2	rep5	13	196
irld39_52	rep5	1	119	114	0.957983
irld39_52	rep5	3	121	108	0.892562
irld39_52	rep5	5	73	72	0.986301
irld39_52	rep5	7	102	81	0.794118
irld39_52	rep5	11	125	54	0.432

## Sheet: Fig_4B
condition	replicate	day	experimentId	imageFile	id	pass	length
irld39_52	rep1	d1	tifs	../tifs/Snap-214-Image Export-17.tif	0	TRUE	824.875
irld39_52	rep1	d1	tifs	../tifs/Snap-214-Image Export-17.tif	2	TRUE	904.18
irld39_52	rep1	d1	tifs	../tifs/Snap-214-Image Export-17.tif	3	TRUE	898.373
irld39_52	rep1	d1	tifs	../tifs/Snap-208-Image Export-11.tif	0	TRUE	898.503
irld39_52	rep1	d1	tifs	../tifs/Snap-208-Image Export-11.tif	1	TRUE	919.808
irld39_52	rep1	d1	tifs	../tifs/Snap-224-Image Export-27.tif	0	TRUE	901.146
irld39_52	rep1	d1	tifs	../tifs/Snap-209-Image Export-12.tif	0	TRUE	985.132
irld39_52	rep1	d1	tifs	../tifs/Snap-209-Image Export-12.tif	1	TRUE	924.895
irld39_52	rep1	d1	tifs	../tifs/Snap-209-Image Export-12.tif	2	TRUE	854.3
irld39_52	rep1	d1	tifs	../tifs/Snap-220-Image Export-23.tif	0	TRUE	961.736
irld39_52	rep1	d1	tifs	../tifs/Snap-212-Image Export-15.tif	0	TRUE	1010.49
irld39_52	rep1	d1	tifs	../tifs/Snap-222-Image Export-25.tif	0	TRUE	964.011
irld39_52	rep1	d1	tifs	../tifs/Snap-222-Image Export-25.tif	1	TRUE	970.484
irld39_52	rep1	d1	tifs	../tifs/Snap-222-Image Export-25.tif	2	TRUE	916.146
irld39_52	rep1	d1	tifs	../tifs/Snap-222-Image Export-25.tif	3	TRUE	947.755
irld39_52	rep1	d1	tifs	../tifs/Snap-223-Image Export-26.tif	1	TRUE	989.108
irld39_52	rep1	d1	tifs	../tifs/Snap-211-Image Export-14.tif	0	TRUE	957.576
irld39_52	rep1	d1	tifs	../tifs/Snap-221-Image Export-24.tif	2	TRUE	972.722
irld39_52	rep1	d1	tifs	../tifs/Snap-221-Image Export-24.tif	4	TRUE	936.677
irld39_52	rep1	d1	tifs	../tifs/Snap-221-Image Export-24.tif	5	TRUE	946.33
irld39_52	rep1	d1	tifs	../tifs/Snap-213-Image Export-16.tif	0	TRUE	902.257
irld39_52	rep1	d1	tifs	../tifs/Snap-202-Image Export-05.tif	0	TRUE	951.194
irld39_52	rep1	d1	tifs	../tifs/Snap-203-Image Export-06.tif	0	TRUE	937.213
irld39_52	rep1	d1	tifs	../tifs/Snap-203-Image Export-06.tif	1	TRUE	980.214
irld39_52	rep1	d1	tifs	../tifs/Snap-203-Image Export-06.tif	2	TRUE	992.142
irld39_52	rep1	d1	tifs	../tifs/Snap-201-Image Export-04.tif	2	TRUE	973.48
irld39_52	rep1	d1	tifs	../tifs/Snap-201-Image Export-04.tif	3	TRUE	970.078
irld39_52	rep1	d1	tifs	../tifs/Snap-201-Image Export-04.tif	7	TRUE	895.025
irld39_52	rep1	d1	tifs	../tifs/Snap-207-Image Export-10.tif	0	TRUE	919.938
irld39_52	rep1	d1	tifs	../tifs/Snap-207-Image Export-10.tif	1	TRUE	1009.92
irld39_52	rep1	d1	tifs	../tifs/Snap-204-Image Export-07.tif	0	TRUE	920.03
irld39_52	rep1	d1	tifs	../tifs/Snap-199-Image Export-02.tif	0	TRUE	941.503
irld39_52	rep1	d1	tifs	../tifs/Snap-199-Image Export-02.tif	1	TRUE	994.953
irld39_52	rep1	d1	tifs	../tifs/Snap-200-Image Export-03.tif	0	TRUE	970.17
irld39_52	rep1	d1	tifs	../tifs/Snap-205-Image Export-08.tif	0	TRUE	968.968
irld39_52	rep1	d1	tifs	../tifs/Snap-205-Image Export-08.tif	1	TRUE	979.769
irld39_52	rep1	d1	tifs	../tifs/Snap-206-Image Export-09.tif	0	TRUE	964.77
irld39_52	rep1	d1	tifs	../tifs/Snap-206-Image Export-09.tif	1	TRUE	986.465
irld39_52	rep1	d1	tifs	../tifs/Snap-218-Image Export-21.tif	1	TRUE	967.137
irld39_52	rep1	d1	tifs	../tifs/Snap-218-Image Export-21.tif	2	TRUE	911.19
irld39_52	rep1	d1	tifs	../tifs/Snap-218-Image Export-21.tif	3	TRUE	970.707
irld39_52	rep1	d1	tifs	../tifs/Snap-218-Image Export-21.tif	4	TRUE	923.822
irld39_52	rep1	d1	tifs	../tifs/Snap-219-Image Export-22.tif	0	TRUE	976.552
irld39_52	rep1	d1	tifs	../tifs/Snap-219-Image Export-22.tif	1	TRUE	935.88
irld39_52	rep1	d1	tifs	../tifs/Snap-219-Image Export-22.tif	3	TRUE	961.736
irld39_52	rep1	d1	tifs	../tifs/Snap-217-Image Export-20.tif	0	TRUE	993.214
irld39_52	rep1	d1	tifs	../tifs/Snap-225-Image Export-28.tif	0	TRUE	960.035
irld39_52	rep1	d1	tifs	../tifs/Snap-225-Image Export-28.tif	1	TRUE	919.473
irld39_52	rep1	d1	tifs	../tifs/Snap-225-Image Export-28.tif	3	TRUE	952.895
irld39_52	rep1	d1	tifs	../tifs/Snap-225-Image Export-28.tif	5	TRUE	958.406
irld39_52	rep1	d1	tifs	../tifs/Snap-225-Image Export-28.tif	6	TRUE	949.808
irld39_52	rep1	d1	tifs	../tifs/Snap-215-Image Export-18.tif	0	TRUE	979.991
irld39_52	rep1	d1	tifs	../tifs/Snap-215-Image Export-18.tif	1	TRUE	976.644
irld39_52	rep1	d1	tifs	../tifs/Snap-226-Image Export-29.tif	0	TRUE	986.649
irld39_52	rep1	d1	tifs	../tifs/Snap-226-Image Export-29.tif	1	TRUE	980.75
irld39_52	rep1	d1	tifs	../tifs/Snap-226-Image Export-29.tif	2	TRUE	926.685
irld39_52	rep1	d1	tifs	../tifs/Snap-226-Image Export-29.tif	3	TRUE	956.909
irld39_52	rep1	d1	tifs	../tifs/Snap-216-Image Export-19.tif	0	TRUE	937.489
irld39_52	rep1	d1	tifs	../tifs/Snap-216-Image Export-19.tif	1	TRUE	973.74
N2	rep1	d1	tifs	../tifs/Snap-197-Image Export-28.tif	1	TRUE	1014.78
N2	rep1	d1	tifs	../tifs/Snap-197-Image Export-28.tif	2	TRUE	934.716
N2	rep1	d1	tifs	../tifs/Snap-179-Image Export-10.tif	0	TRUE	913.779
N2	rep1	d1	tifs	../tifs/Snap-186-Image Export-17.tif	2	TRUE	980.972
N2	rep1	d1	tifs	../tifs/Snap-181-Image Export-12.tif	1	TRUE	992.142
N2	rep1	d1	tifs	../tifs/Snap-184-Image Export-15.tif	0	TRUE	907.213
N2	rep1	d1	tifs	../tifs/Snap-184-Image Export-15.tif	1	TRUE	950.214
N2	rep1	d1	tifs	../tifs/Snap-184-Image Export-15.tif	3	TRUE	999.504
N2	rep1	d1	tifs	../tifs/Snap-184-Image Export-15.tif	4	TRUE	974.054
N2	rep1	d1	tifs	../tifs/Snap-184-Image Export-15.tif	5	TRUE	906.585
N2	rep1	d1	tifs	../tifs/Snap-184-Image Export-15.tif	7	TRUE	894.749
N2	rep1	d1	tifs	../tifs/Snap-184-Image Export-15.tif	8	TRUE	956.151
N2	rep1	d1	tifs	../tifs/Snap-173-Image Export-04.tif	0	TRUE	898.909
N2	rep1	d1	tifs	../tifs/Snap-173-Image Export-04.tif	1	TRUE	928.557
N2	rep1	d1	tifs	../tifs/Snap-185-Image Export-16.tif	0	TRUE	974.813
N2	rep1	d1	tifs	../tifs/Snap-185-Image Export-16.tif	1	TRUE	970.523
N2	rep1	d1	tifs	../tifs/Snap-185-Image Export-16.tif	3	TRUE	941.818
N2	rep1	d1	tifs	../tifs/Snap-185-Image Export-16.tif	5	TRUE	971.687
N2	rep1	d1	tifs	../tifs/Snap-182-Image Export-13.tif	1	TRUE	978.659
N2	rep1	d1	tifs	../tifs/Snap-182-Image Export-13.tif	2	TRUE	982.229
N2	rep1	d1	tifs	../tifs/Snap-180-Image Export-11.tif	0	TRUE	929.185
N2	rep1	d1	tifs	../tifs/Snap-176-Image Export-07.tif	1	TRUE	950.344
N2	rep1	d1	tifs	../tifs/Snap-176-Image Export-07.tif	2	TRUE	955.431
N2	rep1	d1	tifs	../tifs/Snap-176-Image Export-07.tif	3	TRUE	985.354
N2	rep1	d1	tifs	../tifs/Snap-176-Image Export-07.tif	5	TRUE	922.972
N2	rep1	d1	tifs	../tifs/Snap-171-Image Export-02.tif	1	TRUE	925.393
N2	rep1	d1	tifs	../tifs/Snap-171-Image Export-02.tif	2	TRUE	871.537
N2	rep1	d1	tifs	../tifs/Snap-171-Image Export-02.tif	4	TRUE	862.16
N2	rep1	d1	tifs	../tifs/Snap-171-Image Export-02.tif	6	TRUE	969.412
N2	rep1	d1	tifs	../tifs/Snap-174-Image Export-05.tif	0	TRUE	979.769
N2	rep1	d1	tifs	../tifs/Snap-174-Image Export-05.tif	1	TRUE	974.721
N2	rep1	d1	tifs	../tifs/Snap-183-Image Export-14.tif	1	TRUE	889.088
N2	rep1	d1	tifs	../tifs/Snap-183-Image Export-14.tif	2	TRUE	1006.38
N2	rep1	d1	tifs	../tifs/Snap-175-Image Export-06.tif	0	TRUE	960.701
N2	rep1	d1	tifs	../tifs/Snap-175-Image Export-06.tif	1	TRUE	905.383
N2	rep1	d1	tifs	../tifs/Snap-172-Image Export-03.tif	0	TRUE	978.659
N2	rep1	d1	tifs	../tifs/Snap-172-Image Export-03.tif	1	TRUE	941.687
N2	rep1	d1	tifs	../tifs/Snap-170-Image Export-01.tif	0	TRUE	901.054
N2	rep1	d1	tifs	../tifs/Snap-170-Image Export-01.tif	1	TRUE	981.378
N2	rep1	d1	tifs	../tifs/Snap-170-Image Export-01.tif	2	TRUE	996.47
N2	rep1	d1	tifs	../tifs/Snap-177-Image Export-08.tif	0	TRUE	951.823
N2	rep1	d1	tifs	../tifs/Snap-188-Image Export-19.tif	0	TRUE	999.19
N2	rep1	d1	tifs	../tifs/Snap-188-Image Export-19.tif	1	TRUE	966.915
N2	rep1	d1	tifs	../tifs/Snap-193-Image Export-24.tif	1	TRUE	951.102
N2	rep1	d1	tifs	../tifs/Snap-191-Image Export-22.tif	0	TRUE	944.093
N2	rep1	d1	tifs	../tifs/Snap-196-Image Export-27.tif	0	TRUE	948.123
N2	rep1	d1	tifs	../tifs/Snap-196-Image Export-27.tif	1	TRUE	711.869
N2	rep1	d1	tifs	../tifs/Snap-196-Image Export-27.tif	2	TRUE	900.334
N2	rep1	d1	tifs	../tifs/Snap-178-Image Export-09.tif	0	TRUE	1008.66
N2	rep1	d1	tifs	../tifs/Snap-194-Image Export-25.tif	0	TRUE	1028.04
N2	rep1	d1	tifs	../tifs/Snap-194-Image Export-25.tif	1	TRUE	977.364
N2	rep1	d1	tifs	../tifs/Snap-192-Image Export-23.tif	2	TRUE	879.175
N2	rep1	d1	tifs	../tifs/Snap-192-Image Export-23.tif	4	TRUE	972.76
N2	rep1	d1	tifs	../tifs/Snap-195-Image Export-26.tif	1	TRUE	996.378
N2	rep1	d1	tifs	../tifs/Snap-195-Image Export-26.tif	4	TRUE	892.88
N2	rep1	d1	tifs	../tifs/Snap-189-Image Export-20.tif	0	TRUE	949.049
N2	rep1	d1	tifs	../tifs/Snap-189-Image Export-20.tif	1	TRUE	983.117
N2	rep1	d1	tifs	../tifs/Snap-189-Image Export-20.tif	2	TRUE	919.088
N2	rep1	d1	tifs	../tifs/Snap-189-Image Export-20.tif	3	TRUE	961.2
N2	rep1	d1	tifs	../tifs/Snap-189-Image Export-20.tif	4	TRUE	921.991
N2	rep1	d1	tifs	../tifs/Snap-189-Image Export-20.tif	5	TRUE	820.546
N2	rep1	d1	tifs	../tifs/Snap-190-Image Export-21.tif	0	TRUE	954.45
N2	rep1	d1	tifs	../tifs/Snap-190-Image Export-21.tif	1	TRUE	917.127
irld39_52	rep2	d1	tifs	../tifs/Snap-509-Image Export-36.tif	0	TRUE	979.417
irld39_52	rep2	d1	tifs	../tifs/Snap-509-Image Export-36.tif	1	TRUE	955.745
irld39_52	rep2	d1	tifs	../tifs/Snap-491-Image Export-18.tif	0	TRUE	949.179
irld39_52	rep2	d1	tifs	../tifs/Snap-491-Image Export-18.tif	1	TRUE	1017.41
irld39_52	rep2	d1	tifs	../tifs/Snap-491-Image Export-18.tif	2	TRUE	976.736
irld39_52	rep2	d1	tifs	../tifs/Snap-491-Image Export-18.tif	4	TRUE	970.04
irld39_52	rep2	d1	tifs	../tifs/Snap-495-Image Export-22.tif	1	TRUE	894.045
irld39_52	rep2	d1	tifs	../tifs/Snap-495-Image Export-22.tif	3	TRUE	931.996
irld39_52	rep2	d1	tifs	../tifs/Snap-495-Image Export-22.tif	4	TRUE	963.383
irld39_52	rep2	d1	tifs	../tifs/Snap-510-Image Export-37.tif	0	TRUE	1020.4
irld39_52	rep2	d1	tifs	../tifs/Snap-494-Image Export-21.tif	0	TRUE	956.687
irld39_52	rep2	d1	tifs	../tifs/Snap-494-Image Export-21.tif	1	TRUE	952.581
irld39_52	rep2	d1	tifs	../tifs/Snap-492-Image Export-19.tif	0	TRUE	913.465
irld39_52	rep2	d1	tifs	../tifs/Snap-496-Image Export-23.tif	1	TRUE	954.412
irld39_52	rep2	d1	tifs	../tifs/Snap-496-Image Export-23.tif	2	TRUE	971.335
irld39_52	rep2	d1	tifs	../tifs/Snap-496-Image Export-23.tif	3	TRUE	962.088
irld39_52	rep2	d1	tifs	../tifs/Snap-508-Image Export-35.tif	0	TRUE	968.171
irld39_52	rep2	d1	tifs	../tifs/Snap-493-Image Export-20.tif	0	TRUE	980.398
irld39_52	rep2	d1	tifs	../tifs/Snap-493-Image Export-20.tif	1	TRUE	969.948
irld39_52	rep2	d1	tifs	../tifs/Snap-497-Image Export-24.tif	0	TRUE	953.876
irld39_52	rep2	d1	tifs	../tifs/Snap-497-Image Export-24.tif	1	TRUE	964.141
irld39_52	rep2	d1	tifs	../tifs/Snap-497-Image Export-24.tif	2	TRUE	954.948
irld39_52	rep2	d1	tifs	../tifs/Snap-497-Image Export-24.tif	3	TRUE	970.484
irld39_52	rep2	d1	tifs	../tifs/Snap-497-Image Export-24.tif	4	TRUE	982.451
irld39_52	rep2	d1	tifs	../tifs/Snap-497-Image Export-24.tif	7	TRUE	958.832
irld39_52	rep2	d1	tifs	../tifs/Snap-499-Image Export-26.tif	0	TRUE	967.267
irld39_52	rep2	d1	tifs	../tifs/Snap-505-Image Export-32.tif	0	TRUE	1008.84
irld39_52	rep2	d1	tifs	../tifs/Snap-505-Image Export-32.tif	1	TRUE	945.257
irld39_52	rep2	d1	tifs	../tifs/Snap-505-Image Export-32.tif	2	TRUE	991.291
irld39_52	rep2	d1	tifs	../tifs/Snap-504-Image Export-31.tif	9	TRUE	1020.62
irld39_52	rep2	d1	tifs	../tifs/Snap-504-Image Export-31.tif	10	TRUE	846.754
irld39_52	rep2	d1	tifs	../tifs/Snap-504-Image Export-31.tif	13	TRUE	928.465
irld39_52	rep2	d1	tifs	../tifs/Snap-504-Image Export-31.tif	14	TRUE	1000.13
irld39_52	rep2	d1	tifs	../tifs/Snap-498-Image Export-25.tif	0	TRUE	957.89
irld39_52	rep2	d1	tifs	../tifs/Snap-498-Image Export-25.tif	1	TRUE	911.596
irld39_52	rep2	d1	tifs	../tifs/Snap-498-Image Export-25.tif	2	TRUE	991.605
irld39_52	rep2	d1	tifs	../tifs/Snap-498-Image Export-25.tif	3	TRUE	946.552
irld39_52	rep2	d1	tifs	../tifs/Snap-506-Image Export-33.tif	2	TRUE	983.209
irld39_52	rep2	d1	tifs	../tifs/Snap-500-Image Export-27.tif	0	TRUE	1016.74
irld39_52	rep2	d1	tifs	../tifs/Snap-500-Image Export-27.tif	1	TRUE	968.117
irld39_52	rep2	d1	tifs	../tifs/Snap-481-Image Export-08.tif	0	TRUE	1018.22
irld39_52	rep2	d1	tifs	../tifs/Snap-507-Image Export-34.tif	1	TRUE	952.397
irld39_52	rep2	d1	tifs	../tifs/Snap-507-Image Export-34.tif	2	TRUE	956.779
irld39_52	rep2	d1	tifs	../tifs/Snap-507-Image Export-34.tif	3	TRUE	947.755
irld39_52	rep2	d1	tifs	../tifs/Snap-507-Image Export-34.tif	4	TRUE	984.818
irld39_52	rep2	d1	tifs	../tifs/Snap-482-Image Export-09.tif	0	TRUE	980.842
irld39_52	rep2	d1	tifs	../tifs/Snap-480-Image Export-07.tif	0	TRUE	1008.75
irld39_52	rep2	d1	tifs	../tifs/Snap-480-Image Export-07.tif	1	TRUE	912.928
irld39_52	rep2	d1	tifs	../tifs/Snap-483-Image Export-10.tif	2	TRUE	959.943
irld39_52	rep2	d1	tifs	../tifs/Snap-483-Image Export-10.tif	3	TRUE	1000.67
irld39_52	rep2	d1	tifs	../tifs/Snap-475-Image Export-02.tif	0	TRUE	999.19
irld39_52	rep2	d1	tifs	../tifs/Snap-475-Image Export-02.tif	1	TRUE	953.34
irld39_52	rep2	d1	tifs	../tifs/Snap-501-Image Export-28.tif	0	TRUE	919.846
irld39_52	rep2	d1	tifs	../tifs/Snap-474-Image Export-01.tif	0	TRUE	957.001
irld39_52	rep2	d1	tifs	../tifs/Snap-487-Image Export-14.tif	0	TRUE	943.112
irld39_52	rep2	d1	tifs	../tifs/Snap-502-Image Export-29.tif	0	TRUE	942.89
irld39_52	rep2	d1	tifs	../tifs/Snap-502-Image Export-29.tif	1	TRUE	933.643
irld39_52	rep2	d1	tifs	../tifs/Snap-476-Image Export-03.tif	0	TRUE	881.894
irld39_52	rep2	d1	tifs	../tifs/Snap-476-Image Export-03.tif	1	TRUE	930.87
irld39_52	rep2	d1	tifs	../tifs/Snap-476-Image Export-03.tif	3	TRUE	949.179
irld39_52	rep2	d1	tifs	../tifs/Snap-485-Image Export-12.tif	0	TRUE	938.508
irld39_52	rep2	d1	tifs	../tifs/Snap-484-Image Export-11.tif	0	TRUE	1025.32
irld39_52	rep2	d1	tifs	../tifs/Snap-486-Image Export-13.tif	0	TRUE	975.533
irld39_52	rep2	d1	tifs	../tifs/Snap-479-Image Export-06.tif	0	TRUE	1004.11
irld39_52	rep2	d1	tifs	../tifs/Snap-478-Image Export-05.tif	0	TRUE	967.895
irld39_52	rep2	d1	tifs	../tifs/Snap-489-Image Export-16.tif	1	TRUE	977.272
irld39_52	rep2	d1	tifs	../tifs/Snap-489-Image Export-16.tif	2	TRUE	988.258
irld39_52	rep2	d1	tifs	../tifs/Snap-511-Image Export-38.tif	1	TRUE	966.6
irld39_52	rep2	d1	tifs	../tifs/Snap-511-Image Export-38.tif	2	TRUE	1015.89
irld39_52	rep2	d1	tifs	../tifs/Snap-511-Image Export-38.tif	3	TRUE	921.141
irld39_52	rep2	d1	tifs	../tifs/Snap-490-Image Export-17.tif	1	TRUE	1014.02
irld39_52	rep2	d1	tifs	../tifs/Snap-490-Image Export-17.tif	2	TRUE	1034.96
irld39_52	rep2	d1	tifs	../tifs/Snap-490-Image Export-17.tif	3	TRUE	989.016
irld39_52	rep2	d1	tifs	../tifs/Snap-488-Image Export-15.tif	0	TRUE	1015.98
N2	rep2	d1	tifs	../tifs/Snap-464-Image Export-23.tif	0	TRUE	1018
N2	rep2	d1	tifs	../tifs/Snap-464-Image Export-23.tif	1	TRUE	967.489
N2	rep2	d1	tifs	../tifs/Snap-454-Image Export-13.tif	2	TRUE	1036.66
N2	rep2	d1	tifs	../tifs/Snap-454-Image Export-13.tif	3	TRUE	983.209
N2	rep2	d1	tifs	../tifs/Snap-454-Image Export-13.tif	4	TRUE	1021.7
N2	rep2	d1	tifs	../tifs/Snap-454-Image Export-13.tif	6	TRUE	886.276
N2	rep2	d1	tifs	../tifs/Snap-460-Image Export-19.tif	0	TRUE	1007.44
N2	rep2	d1	tifs	../tifs/Snap-460-Image Export-19.tif	2	TRUE	970.669
N2	rep2	d1	tifs	../tifs/Snap-461-Image Export-20.tif	0	TRUE	1002.41
N2	rep2	d1	tifs	../tifs/Snap-453-Image Export-12.tif	0	TRUE	1002.41
N2	rep2	d1	tifs	../tifs/Snap-453-Image Export-12.tif	1	TRUE	1058.45
N2	rep2	d1	tifs	../tifs/Snap-453-Image Export-12.tif	2	TRUE	933.421
N2	rep2	d1	tifs	../tifs/Snap-453-Image Export-12.tif	4	TRUE	1043.13
N2	rep2	d1	tifs	../tifs/Snap-453-Image Export-12.tif	5	TRUE	985.262
N2	rep2	d1	tifs	../tifs/Snap-466-Image Export-25.tif	0	TRUE	989.33
N2	rep2	d1	tifs	../tifs/Snap-463-Image Export-22.tif	0	TRUE	984.818
N2	rep2	d1	tifs	../tifs/Snap-463-Image Export-22.tif	4	TRUE	993.306
N2	rep2	d1	tifs	../tifs/Snap-456-Image Export-15.tif	0	TRUE	1010.93
N2	rep2	d1	tifs	../tifs/Snap-451-Image Export-10.tif	1	TRUE	1026.88
N2	rep2	d1	tifs	../tifs/Snap-451-Image Export-10.tif	2	TRUE	1010.05
N2	rep2	d1	tifs	../tifs/Snap-462-Image Export-21.tif	1	TRUE	989.46
N2	rep2	d1	tifs	../tifs/Snap-462-Image Export-21.tif	4	TRUE	878.953
N2	rep2	d1	tifs	../tifs/Snap-462-Image Export-21.tif	5	TRUE	976.199
N2	rep2	d1	tifs	../tifs/Snap-457-Image Export-16.tif	0	TRUE	1001.56
N2	rep2	d1	tifs	../tifs/Snap-457-Image Export-16.tif	1	TRUE	1024.16
N2	rep2	d1	tifs	../tifs/Snap-465-Image Export-24.tif	1	TRUE	923.378
N2	rep2	d1	tifs	../tifs/Snap-448-Image Export-07.tif	1	TRUE	956.687
N2	rep2	d1	tifs	../tifs/Snap-455-Image Export-14.tif	2	TRUE	1009.19
N2	rep2	d1	tifs	../tifs/Snap-455-Image Export-14.tif	3	TRUE	1037.42
N2	rep2	d1	tifs	../tifs/Snap-455-Image Export-14.tif	4	TRUE	1038.93
N2	rep2	d1	tifs	../tifs/Snap-455-Image Export-14.tif	5	TRUE	971.243
N2	rep2	d1	tifs	../tifs/Snap-452-Image Export-11.tif	5	TRUE	989.591
N2	rep2	d1	tifs	../tifs/Snap-452-Image Export-11.tif	6	TRUE	1015.76
N2	rep2	d1	tifs	../tifs/Snap-452-Image Export-11.tif	8	TRUE	991.383
N2	rep2	d1	tifs	../tifs/Snap-452-Image Export-11.tif	9	TRUE	1000.45
N2	rep2	d1	tifs	../tifs/Snap-452-Image Export-11.tif	10	TRUE	970.392
N2	rep2	d1	tifs	../tifs/Snap-446-Image Export-05.tif	0	TRUE	1030.54
N2	rep2	d1	tifs	../tifs/Snap-446-Image Export-05.tif	3	TRUE	985.484
N2	rep2	d1	tifs	../tifs/Snap-471-Image Export-30.tif	3	TRUE	1000.48
N2	rep2	d1	tifs	../tifs/Snap-471-Image Export-30.tif	4	TRUE	949.808
N2	rep2	d1	tifs	../tifs/Snap-443-Image Export-02.tif	0	TRUE	945.479
N2	rep2	d1	tifs	../tifs/Snap-443-Image Export-02.tif	1	TRUE	995.75
N2	rep2	d1	tifs	../tifs/Snap-443-Image Export-02.tif	2	TRUE	972.315
N2	rep2	d1	tifs	../tifs/Snap-458-Image Export-17.tif	0	TRUE	961.33
N2	rep2	d1	tifs	../tifs/Snap-445-Image Export-04.tif	1	TRUE	960.035
N2	rep2	d1	tifs	../tifs/Snap-445-Image Export-04.tif	2	TRUE	967.673
N2	rep2	d1	tifs	../tifs/Snap-442-Image Export-01.tif	0	TRUE	1018.35
N2	rep2	d1	tifs	../tifs/Snap-442-Image Export-01.tif	1	TRUE	1015.76
N2	rep2	d1	tifs	../tifs/Snap-468-Image Export-27.tif	0	TRUE	952.581
N2	rep2	d1	tifs	../tifs/Snap-468-Image Export-27.tif	1	TRUE	964.585
N2	rep2	d1	tifs	../tifs/Snap-472-Image Export-31.tif	1	TRUE	1010.71
N2	rep2	d1	tifs	../tifs/Snap-447-Image Export-06.tif	0	TRUE	932.311
N2	rep2	d1	tifs	../tifs/Snap-447-Image Export-06.tif	1	TRUE	975.127
N2	rep2	d1	tifs	../tifs/Snap-447-Image Export-06.tif	2	TRUE	984.098
N2	rep2	d1	tifs	../tifs/Snap-444-Image Export-03.tif	2	TRUE	1025.9
N2	rep2	d1	tifs	../tifs/Snap-469-Image Export-28.tif	2	TRUE	1009.55
N2	rep2	d1	tifs	../tifs/Snap-469-Image Export-28.tif	3	TRUE	960.571
N2	rep2	d1	tifs	../tifs/Snap-469-Image Export-28.tif	4	TRUE	1000.13
N2	rep2	d1	tifs	../tifs/Snap-470-Image Export-29.tif	2	TRUE	941.151
N2	rep2	d1	tifs	../tifs/Snap-470-Image Export-29.tif	4	TRUE	1020.53
N2	rep2	d1	tifs	../tifs/Snap-470-Image Export-29.tif	5	TRUE	945.035
N2	rep2	d1	tifs	../tifs/Snap-459-Image Export-18.tif	0	TRUE	984.374
N2	rep2	d1	tifs	../tifs/Snap-449-Image Export-08.tif	0	TRUE	1008.12
N2	rep2	d1	tifs	../tifs/Snap-449-Image Export-08.tif	1	TRUE	963.827
N2	rep2	d1	tifs	../tifs/Snap-449-Image Export-08.tif	2	TRUE	1004.11
N2	rep2	d1	tifs	../tifs/Snap-450-Image Export-09.tif	0	TRUE	991.329
N2	rep2	d1	tifs	../tifs/Snap-450-Image Export-09.tif	2	TRUE	986.113
N2	rep2	d1	tifs	../tifs/Snap-450-Image Export-09.tif	3	TRUE	1036.03
irld39_52	rep3	d1	tifs	../tifs/Snap-575-Image Export-29.tif	1	TRUE	883.687
irld39_52	rep3	d1	tifs	../tifs/Snap-575-Image Export-29.tif	2	TRUE	872.035
irld39_52	rep3	d1	tifs	../tifs/Snap-575-Image Export-29.tif	3	TRUE	927.484
irld39_52	rep3	d1	tifs	../tifs/Snap-574-Image Export-28.tif	0	TRUE	877.566
irld39_52	rep3	d1	tifs	../tifs/Snap-574-Image Export-28.tif	1	TRUE	887.885
irld39_52	rep3	d1	tifs	../tifs/Snap-574-Image Export-28.tif	2	TRUE	872.517
irld39_52	rep3	d1	tifs	../tifs/Snap-574-Image Export-28.tif	3	TRUE	910.339
irld39_52	rep3	d1	tifs	../tifs/Snap-555-Image Export-09.tif	1	TRUE	859.923
irld39_52	rep3	d1	tifs	../tifs/Snap-555-Image Export-09.tif	2	TRUE	980.176
irld39_52	rep3	d1	tifs	../tifs/Snap-555-Image Export-09.tif	3	TRUE	947.885
irld39_52	rep3	d1	tifs	../tifs/Snap-555-Image Export-09.tif	4	TRUE	475.486
irld39_52	rep3	d1	tifs	../tifs/Snap-555-Image Export-09.tif	5	TRUE	874.662
irld39_52	rep3	d1	tifs	../tifs/Snap-555-Image Export-09.tif	7	TRUE	894.305
irld39_52	rep3	d1	tifs	../tifs/Snap-555-Image Export-09.tif	8	TRUE	928.426
irld39_52	rep3	d1	tifs	../tifs/Snap-555-Image Export-09.tif	9	TRUE	827.242
irld39_52	rep3	d1	tifs	../tifs/Snap-555-Image Export-09.tif	11	TRUE	932.219
irld39_52	rep3	d1	tifs	../tifs/Snap-554-Image Export-08.tif	3	TRUE	875.697
irld39_52	rep3	d1	tifs	../tifs/Snap-554-Image Export-08.tif	8	TRUE	829.073
irld39_52	rep3	d1	tifs	../tifs/Snap-554-Image Export-08.tif	9	TRUE	839.078
irld39_52	rep3	d1	tifs	../tifs/Snap-554-Image Export-08.tif	10	TRUE	883.373
irld39_52	rep3	d1	tifs	../tifs/Snap-554-Image Export-08.tif	11	TRUE	874.44
irld39_52	rep3	d1	tifs	../tifs/Snap-561-Image Export-15.tif	1	TRUE	878.416
irld39_52	rep3	d1	tifs	../tifs/Snap-561-Image Export-15.tif	2	TRUE	862.16
irld39_52	rep3	d1	tifs	../tifs/Snap-561-Image Export-15.tif	3	TRUE	939.228
irld39_52	rep3	d1	tifs	../tifs/Snap-560-Image Export-14.tif	1	TRUE	967.267
irld39_52	rep3	d1	tifs	../tifs/Snap-560-Image Export-14.tif	2	TRUE	880.469
irld39_52	rep3	d1	tifs	../tifs/Snap-563-Image Export-17.tif	1	TRUE	885.74
irld39_52	rep3	d1	tifs	../tifs/Snap-563-Image Export-17.tif	3	TRUE	925.653
irld39_52	rep3	d1	tifs	../tifs/Snap-563-Image Export-17.tif	4	TRUE	946.59
irld39_52	rep3	d1	tifs	../tifs/Snap-563-Image Export-17.tif	6	TRUE	868.319
irld39_52	rep3	d1	tifs	../tifs/Snap-562-Image Export-16.tif	0	TRUE	973.388
irld39_52	rep3	d1	tifs	../tifs/Snap-562-Image Export-16.tif	1	TRUE	908.6
irld39_52	rep3	d1	tifs	../tifs/Snap-566-Image Export-20.tif	1	TRUE	925.431
irld39_52	rep3	d1	tifs	../tifs/Snap-566-Image Export-20.tif	2	TRUE	903.237
irld39_52	rep3	d1	tifs	../tifs/Snap-567-Image Export-21.tif	1	TRUE	937.841
irld39_52	rep3	d1	tifs	../tifs/Snap-567-Image Export-21.tif	2	TRUE	904.31
irld39_52	rep3	d1	tifs	../tifs/Snap-556-Image Export-10.tif	0	TRUE	899.668
irld39_52	rep3	d1	tifs	../tifs/Snap-556-Image Export-10.tif	1	TRUE	896.32
irld39_52	rep3	d1	tifs	../tifs/Snap-556-Image Export-10.tif	2	TRUE	909.267
irld39_52	rep3	d1	tifs	../tifs/Snap-557-Image Export-11.tif	0	TRUE	981.156
irld39_52	rep3	d1	tifs	../tifs/Snap-578-Image Export-32.tif	0	TRUE	921.547
irld39_52	rep3	d1	tifs	../tifs/Snap-549-Image Export-03.tif	1	TRUE	928.112
irld39_52	rep3	d1	tifs	../tifs/Snap-549-Image Export-03.tif	2	TRUE	910.339
irld39_52	rep3	d1	tifs	../tifs/Snap-548-Image Export-02.tif	0	TRUE	927.078
irld39_52	rep3	d1	tifs	../tifs/Snap-564-Image Export-18.tif	4	TRUE	913.373
irld39_52	rep3	d1	tifs	../tifs/Snap-564-Image Export-18.tif	6	TRUE	777.638
irld39_52	rep3	d1	tifs	../tifs/Snap-564-Image Export-18.tif	7	TRUE	922.527
irld39_52	rep3	d1	tifs	../tifs/Snap-565-Image Export-19.tif	2	TRUE	879.619
irld39_52	rep3	d1	tifs	../tifs/Snap-565-Image Export-19.tif	3	TRUE	841.851
irld39_52	rep3	d1	tifs	../tifs/Snap-565-Image Export-19.tif	4	TRUE	904.18
irld39_52	rep3	d1	tifs	../tifs/Snap-565-Image Export-19.tif	5	TRUE	865.914
irld39_52	rep3	d1	tifs	../tifs/Snap-565-Image Export-19.tif	6	TRUE	905.919
irld39_52	rep3	d1	tifs	../tifs/Snap-550-Image Export-04.tif	2	TRUE	939.634
irld39_52	rep3	d1	tifs	../tifs/Snap-550-Image Export-04.tif	3	TRUE	883.817
irld39_52	rep3	d1	tifs	../tifs/Snap-550-Image Export-04.tif	4	TRUE	910.025
irld39_52	rep3	d1	tifs	../tifs/Snap-551-Image Export-05.tif	0	TRUE	896.856
irld39_52	rep3	d1	tifs	../tifs/Snap-551-Image Export-05.tif	1	TRUE	907.788
irld39_52	rep3	d1	tifs	../tifs/Snap-552-Image Export-06.tif	0	TRUE	894.397
irld39_52	rep3	d1	tifs	../tifs/Snap-552-Image Export-06.tif	1	TRUE	889.624
irld39_52	rep3	d1	tifs	../tifs/Snap-552-Image Export-06.tif	2	TRUE	899.093
irld39_52	rep3	d1	tifs	../tifs/Snap-553-Image Export-07.tif	0	TRUE	915.832
irld39_52	rep3	d1	tifs	../tifs/Snap-553-Image Export-07.tif	1	TRUE	909.895
irld39_52	rep3	d1	tifs	../tifs/Snap-553-Image Export-07.tif	2	TRUE	870.817
irld39_52	rep3	d1	tifs	../tifs/Snap-553-Image Export-07.tif	3	TRUE	931.866
irld39_52	rep3	d1	tifs	../tifs/Snap-553-Image Export-07.tif	4	TRUE	897.967
irld39_52	rep3	d1	tifs	../tifs/Snap-570-Image Export-24.tif	1	TRUE	661.009
irld39_52	rep3	d1	tifs	../tifs/Snap-570-Image Export-24.tif	3	TRUE	912.04
irld39_52	rep3	d1	tifs	../tifs/Snap-570-Image Export-24.tif	4	TRUE	885.334
irld39_52	rep3	d1	tifs	../tifs/Snap-571-Image Export-25.tif	1	TRUE	893.638
irld39_52	rep3	d1	tifs	../tifs/Snap-571-Image Export-25.tif	2	TRUE	885.518
irld39_52	rep3	d1	tifs	../tifs/Snap-571-Image Export-25.tif	3	TRUE	892.436
irld39_52	rep3	d1	tifs	../tifs/Snap-571-Image Export-25.tif	4	TRUE	919.31
irld39_52	rep3	d1	tifs	../tifs/Snap-572-Image Export-26.tif	2	TRUE	893.064
irld39_52	rep3	d1	tifs	../tifs/Snap-572-Image Export-26.tif	4	TRUE	899.89
irld39_52	rep3	d1	tifs	../tifs/Snap-572-Image Export-26.tif	6	TRUE	907.658
irld39_52	rep3	d1	tifs	../tifs/Snap-573-Image Export-27.tif	1	TRUE	885.556
irld39_52	rep3	d1	tifs	../tifs/Snap-547-Image Export-01.tif	0	TRUE	871.445
irld39_52	rep3	d1	tifs	../tifs/Snap-576-Image Export-30.tif	0	TRUE	922.619
irld39_52	rep3	d1	tifs	../tifs/Snap-576-Image Export-30.tif	1	TRUE	896.764
irld39_52	rep3	d1	tifs	../tifs/Snap-576-Image Export-30.tif	3	TRUE	863.547
irld39_52	rep3	d1	tifs	../tifs/Snap-576-Image Export-30.tif	4	TRUE	912.262
irld39_52	rep3	d1	tifs	../tifs/Snap-577-Image Export-31.tif	0	TRUE	932.663
irld39_52	rep3	d1	tifs	../tifs/Snap-577-Image Export-31.tif	1	TRUE	801.478
irld39_52	rep3	d1	tifs	../tifs/Snap-577-Image Export-31.tif	3	TRUE	902.793
irld39_52	rep3	d1	tifs	../tifs/Snap-577-Image Export-31.tif	4	TRUE	916.59
irld39_52	rep3	d1	tifs	../tifs/Snap-559-Image Export-13.tif	2	TRUE	944.407
irld39_52	rep3	d1	tifs	../tifs/Snap-559-Image Export-13.tif	4	TRUE	904.088
irld39_52	rep3	d1	tifs	../tifs/Snap-559-Image Export-13.tif	6	TRUE	935.88
irld39_52	rep3	d1	tifs	../tifs/Snap-558-Image Export-12.tif	0	TRUE	928.02
irld39_52	rep3	d1	tifs	../tifs/Snap-558-Image Export-12.tif	1	TRUE	908.064
irld39_52	rep3	d1	tifs	../tifs/Snap-569-Image Export-23.tif	1	TRUE	948.291
irld39_52	rep3	d1	tifs	../tifs/Snap-569-Image Export-23.tif	2	TRUE	885.02
irld39_52	rep3	d1	tifs	../tifs/Snap-569-Image Export-23.tif	3	TRUE	968.117
irld39_52	rep3	d1	tifs	../tifs/Snap-569-Image Export-23.tif	4	TRUE	878.731
irld39_52	rep3	d1	tifs	../tifs/Snap-568-Image Export-22.tif	0	TRUE	890.421
irld39_52	rep3	d1	tifs	../tifs/Snap-568-Image Export-22.tif	1	TRUE	946.774
irld39_52	rep3	d1	tifs	../tifs/Snap-568-Image Export-22.tif	2	TRUE	924.765
irld39_52	rep3	d1	tifs	../tifs/Snap-568-Image Export-22.tif	3	TRUE	928.465
N2	rep3	d1	tifs	../tifs/Snap-527-Image Export-16.tif	1	TRUE	949.455
N2	rep3	d1	tifs	../tifs/Snap-527-Image Export-16.tif	2	TRUE	866.672
N2	rep3	d1	tifs	../tifs/Snap-527-Image Export-16.tif	4	TRUE	881.136
N2	rep3	d1	tifs	../tifs/Snap-527-Image Export-16.tif	5	TRUE	762.638
N2	rep3	d1	tifs	../tifs/Snap-527-Image Export-16.tif	7	TRUE	869.928
N2	rep3	d1	tifs	../tifs/Snap-525-Image Export-14.tif	1	TRUE	920.16
N2	rep3	d1	tifs	../tifs/Snap-525-Image Export-14.tif	2	TRUE	943.833
N2	rep3	d1	tifs	../tifs/Snap-525-Image Export-14.tif	3	TRUE	909.359
N2	rep3	d1	tifs	../tifs/Snap-525-Image Export-14.tif	5	TRUE	929.943
N2	rep3	d1	tifs	../tifs/Snap-525-Image Export-14.tif	6	TRUE	921.103
N2	rep3	d1	tifs	../tifs/Snap-525-Image Export-14.tif	7	TRUE	907.528
N2	rep3	d1	tifs	../tifs/Snap-522-Image Export-11.tif	0	TRUE	896.986
N2	rep3	d1	tifs	../tifs/Snap-522-Image Export-11.tif	1	TRUE	890.827
N2	rep3	d1	tifs	../tifs/Snap-522-Image Export-11.tif	2	TRUE	831.662
N2	rep3	d1	tifs	../tifs/Snap-544-Image Export-33.tif	0	TRUE	773.44
N2	rep3	d1	tifs	../tifs/Snap-544-Image Export-33.tif	2	TRUE	886.905
N2	rep3	d1	tifs	../tifs/Snap-523-Image Export-12.tif	0	TRUE	900.204
N2	rep3	d1	tifs	../tifs/Snap-523-Image Export-12.tif	1	TRUE	920.474
N2	rep3	d1	tifs	../tifs/Snap-523-Image Export-12.tif	2	TRUE	879.711
N2	rep3	d1	tifs	../tifs/Snap-523-Image Export-12.tif	3	TRUE	910.875
N2	rep3	d1	tifs	../tifs/Snap-526-Image Export-15.tif	0	TRUE	892.658
N2	rep3	d1	tifs	../tifs/Snap-526-Image Export-15.tif	1	TRUE	914.667
N2	rep3	d1	tifs	../tifs/Snap-526-Image Export-15.tif	4	TRUE	936.639
N2	rep3	d1	tifs	../tifs/Snap-521-Image Export-10.tif	2	TRUE	908.822
N2	rep3	d1	tifs	../tifs/Snap-521-Image Export-10.tif	3	TRUE	878.416
N2	rep3	d1	tifs	../tifs/Snap-521-Image Export-10.tif	4	TRUE	825.373
N2	rep3	d1	tifs	../tifs/Snap-546-Image Export-35.tif	0	TRUE	873.016
N2	rep3	d1	tifs	../tifs/Snap-546-Image Export-35.tif	2	TRUE	923.156
N2	rep3	d1	tifs	../tifs/Snap-541-Image Export-30.tif	1	TRUE	916.905
N2	rep3	d1	tifs	../tifs/Snap-524-Image Export-13.tif	0	TRUE	889.716
N2	rep3	d1	tifs	../tifs/Snap-524-Image Export-13.tif	3	TRUE	833.363
N2	rep3	d1	tifs	../tifs/Snap-524-Image Export-13.tif	4	TRUE	877.03
N2	rep3	d1	tifs	../tifs/Snap-543-Image Export-32.tif	0	TRUE	873.46
N2	rep3	d1	tifs	../tifs/Snap-543-Image Export-32.tif	2	TRUE	852.653
N2	rep3	d1	tifs	../tifs/Snap-539-Image Export-28.tif	1	TRUE	899.537
N2	rep3	d1	tifs	../tifs/Snap-539-Image Export-28.tif	2	TRUE	934.364
N2	rep3	d1	tifs	../tifs/Snap-539-Image Export-28.tif	3	TRUE	894.489
N2	rep3	d1	tifs	../tifs/Snap-539-Image Export-28.tif	4	TRUE	875.199
N2	rep3	d1	tifs	../tifs/Snap-545-Image Export-34.tif	0	TRUE	845.237
N2	rep3	d1	tifs	../tifs/Snap-545-Image Export-34.tif	1	TRUE	867.875
N2	rep3	d1	tifs	../tifs/Snap-542-Image Export-31.tif	2	TRUE	902.793
N2	rep3	d1	tifs	../tifs/Snap-542-Image Export-31.tif	3	TRUE	893.194
N2	rep3	d1	tifs	../tifs/Snap-542-Image Export-31.tif	4	TRUE	864.397
N2	rep3	d1	tifs	../tifs/Snap-542-Image Export-31.tif	5	TRUE	904.938
N2	rep3	d1	tifs	../tifs/Snap-542-Image Export-31.tif	6	TRUE	898.189
N2	rep3	d1	tifs	../tifs/Snap-519-Image Export-08.tif	1	TRUE	922.934
N2	rep3	d1	tifs	../tifs/Snap-519-Image Export-08.tif	2	TRUE	897.078
N2	rep3	d1	tifs	../tifs/Snap-519-Image Export-08.tif	4	TRUE	858.146
N2	rep3	d1	tifs	../tifs/Snap-528-Image Export-17.tif	0	TRUE	837.155
N2	rep3	d1	tifs	../tifs/Snap-528-Image Export-17.tif	1	TRUE	928.242
N2	rep3	d1	tifs	../tifs/Snap-528-Image Export-17.tif	2	TRUE	844.126
N2	rep3	d1	tifs	../tifs/Snap-530-Image Export-19.tif	0	TRUE	992.05
N2	rep3	d1	tifs	../tifs/Snap-530-Image Export-19.tif	1	TRUE	887.441
N2	rep3	d1	tifs	../tifs/Snap-530-Image Export-19.tif	2	TRUE	888.996
N2	rep3	d1	tifs	../tifs/Snap-530-Image Export-19.tif	3	TRUE	736.468
N2	rep3	d1	tifs	../tifs/Snap-530-Image Export-19.tif	4	TRUE	921.325
N2	rep3	d1	tifs	../tifs/Snap-529-Image Export-18.tif	0	TRUE	886.092
N2	rep3	d1	tifs	../tifs/Snap-529-Image Export-18.tif	1	TRUE	859.663
N2	rep3	d1	tifs	../tifs/Snap-529-Image Export-18.tif	2	TRUE	923.026
N2	rep3	d1	tifs	../tifs/Snap-529-Image Export-18.tif	3	TRUE	958.87
N2	rep3	d1	tifs	../tifs/Snap-534-Image Export-23.tif	0	TRUE	817.643
N2	rep3	d1	tifs	../tifs/Snap-534-Image Export-23.tif	1	TRUE	881.986
N2	rep3	d1	tifs	../tifs/Snap-534-Image Export-23.tif	2	TRUE	883.817
N2	rep3	d1	tifs	../tifs/Snap-534-Image Export-23.tif	3	TRUE	893.638
N2	rep3	d1	tifs	../tifs/Snap-537-Image Export-26.tif	0	TRUE	915.61
N2	rep3	d1	tifs	../tifs/Snap-537-Image Export-26.tif	1	TRUE	910.339
N2	rep3	d1	tifs	../tifs/Snap-537-Image Export-26.tif	2	TRUE	873.125
N2	rep3	d1	tifs	../tifs/Snap-537-Image Export-26.tif	3	TRUE	836.136
N2	rep3	d1	tifs	../tifs/Snap-518-Image Export-07.tif	0	TRUE	821.213
N2	rep3	d1	tifs	../tifs/Snap-532-Image Export-21.tif	1	TRUE	957.63
N2	rep3	d1	tifs	../tifs/Snap-532-Image Export-21.tif	2	TRUE	797.242
N2	rep3	d1	tifs	../tifs/Snap-532-Image Export-21.tif	3	TRUE	928.334
N2	rep3	d1	tifs	../tifs/Snap-532-Image Export-21.tif	4	TRUE	877.88
N2	rep3	d1	tifs	../tifs/Snap-535-Image Export-24.tif	0	TRUE	908.692
N2	rep3	d1	tifs	../tifs/Snap-533-Image Export-22.tif	2	TRUE	892.344
N2	rep3	d1	tifs	../tifs/Snap-533-Image Export-22.tif	3	TRUE	912.17
N2	rep3	d1	tifs	../tifs/Snap-533-Image Export-22.tif	5	TRUE	863.769
N2	rep3	d1	tifs	../tifs/Snap-533-Image Export-22.tif	6	TRUE	883.503
N2	rep3	d1	tifs	../tifs/Snap-533-Image Export-22.tif	7	TRUE	874.716
N2	rep3	d1	tifs	../tifs/Snap-533-Image Export-22.tif	8	TRUE	844.165
N2	rep3	d1	tifs	../tifs/Snap-533-Image Export-22.tif	9	TRUE	903.958
N2	rep3	d1	tifs	../tifs/Snap-531-Image Export-20.tif	1	TRUE	911.228
N2	rep3	d1	tifs	../tifs/Snap-531-Image Export-20.tif	2	TRUE	891.141
N2	rep3	d1	tifs	../tifs/Snap-531-Image Export-20.tif	4	TRUE	942.89
N2	rep3	d1	tifs	../tifs/Snap-536-Image Export-25.tif	0	TRUE	948.069
N2	rep3	d1	tifs	../tifs/Snap-536-Image Export-25.tif	1	TRUE	861.494
N2	rep3	d1	tifs	../tifs/Snap-517-Image Export-06.tif	2	TRUE	908.064
N2	rep3	d1	tifs	../tifs/Snap-538-Image Export-27.tif	1	TRUE	899.537
N2	rep3	d1	tifs	../tifs/Snap-538-Image Export-27.tif	4	TRUE	880.914
N2	rep3	d1	tifs	../tifs/Snap-538-Image Export-27.tif	5	TRUE	917.349
N2	rep3	d1	tifs	../tifs/Snap-538-Image Export-27.tif	6	TRUE	895.025
N2	rep3	d1	tifs	../tifs/Snap-538-Image Export-27.tif	7	TRUE	878.731
N2	rep3	d1	tifs	../tifs/Snap-515-Image Export-04.tif	0	TRUE	929.315
N2	rep3	d1	tifs	../tifs/Snap-515-Image Export-04.tif	1	TRUE	875.069
N2	rep3	d1	tifs	../tifs/Snap-515-Image Export-04.tif	2	TRUE	872.073
N2	rep3	d1	tifs	../tifs/Snap-515-Image Export-04.tif	3	TRUE	870.778
N2	rep3	d1	tifs	../tifs/Snap-515-Image Export-04.tif	4	TRUE	926.818
N2	rep3	d1	tifs	../tifs/Snap-512-Image Export-01.tif	1	TRUE	885.648
N2	rep3	d1	tifs	../tifs/Snap-513-Image Export-02.tif	0	TRUE	836.933
N2	rep3	d1	tifs	../tifs/Snap-540-Image Export-29.tif	0	TRUE	879.933
N2	rep3	d1	tifs	../tifs/Snap-516-Image Export-05.tif	0	TRUE	671.995
N2	rep3	d1	tifs	../tifs/Snap-516-Image Export-05.tif	1	TRUE	930.257
N2	rep3	d1	tifs	../tifs/Snap-516-Image Export-05.tif	2	TRUE	873.368
N2	rep3	d1	tifs	../tifs/Snap-520-Image Export-09.tif	0	TRUE	898.503
N2	rep3	d1	tifs	../tifs/Snap-520-Image Export-09.tif	1	TRUE	878.731
N2	rep3	d1	tifs	../tifs/Snap-520-Image Export-09.tif	2	TRUE	940.837
N2	rep3	d1	tifs	../tifs/Snap-520-Image Export-09.tif	3	TRUE	869.04
N2	rep3	d1	tifs	../tifs/Snap-514-Image Export-03.tif	1	TRUE	880.6
irld39_52	rep1	d8	tifs	../tifs/Snap-1057-Image Export-30.tif	0	TRUE	580.593
irld39_52	rep1	d8	tifs	../tifs/Snap-1057-Image Export-30.tif	1	TRUE	632.786
irld39_52	rep1	d8	tifs	../tifs/Snap-1057-Image Export-30.tif	2	TRUE	694.541
irld39_52	rep1	d8	tifs	../tifs/Snap-1057-Image Export-30.tif	3	TRUE	611.849
irld39_52	rep1	d8	tifs	../tifs/Snap-1057-Image Export-30.tif	5	TRUE	599.883
irld39_52	rep1	d8	tifs	../tifs/Snap-1031-Image Export-04.tif	0	TRUE	687.401
irld39_52	rep1	d8	tifs	../tifs/Snap-1031-Image Export-04.tif	1	TRUE	680.613
irld39_52	rep1	d8	tifs	../tifs/Snap-1054-Image Export-27.tif	0	TRUE	568.627
irld39_52	rep1	d8	tifs	../tifs/Snap-1054-Image Export-27.tif	1	TRUE	660.473
irld39_52	rep1	d8	tifs	../tifs/Snap-1054-Image Export-27.tif	2	TRUE	738.928
irld39_52	rep1	d8	tifs	../tifs/Snap-1054-Image Export-27.tif	4	TRUE	337.828
irld39_52	rep1	d8	tifs	../tifs/Snap-1048-Image Export-21.tif	0	TRUE	595.777
irld39_52	rep1	d8	tifs	../tifs/Snap-1048-Image Export-21.tif	1	TRUE	592.429
irld39_52	rep1	d8	tifs	../tifs/Snap-1048-Image Export-21.tif	2	TRUE	394.312
irld39_52	rep1	d8	tifs	../tifs/Snap-1032-Image Export-05.tif	1	TRUE	440.032
irld39_52	rep1	d8	tifs	../tifs/Snap-1032-Image Export-05.tif	3	TRUE	480.665
irld39_52	rep1	d8	tifs	../tifs/Snap-1049-Image Export-22.tif	0	TRUE	635.874
irld39_52	rep1	d8	tifs	../tifs/Snap-1050-Image Export-23.tif	0	TRUE	656.367
irld39_52	rep1	d8	tifs	../tifs/Snap-1052-Image Export-25.tif	0	TRUE	645.603
irld39_52	rep1	d8	tifs	../tifs/Snap-1052-Image Export-25.tif	1	TRUE	564.076
irld39_52	rep1	d8	tifs	../tifs/Snap-1029-Image Export-02.tif	1	TRUE	660.657
irld39_52	rep1	d8	tifs	../tifs/Snap-1029-Image Export-02.tif	4	TRUE	622.835
irld39_52	rep1	d8	tifs	../tifs/Snap-1028-Image Export-01.tif	0	TRUE	621.096
irld39_52	rep1	d8	tifs	../tifs/Snap-1034-Image Export-07.tif	0	TRUE	607.965
irld39_52	rep1	d8	tifs	../tifs/Snap-1034-Image Export-07.tif	2	TRUE	730.531
irld39_52	rep1	d8	tifs	../tifs/Snap-1034-Image Export-07.tif	3	TRUE	602.38
irld39_52	rep1	d8	tifs	../tifs/Snap-1034-Image Export-07.tif	4	TRUE	506.428
irld39_52	rep1	d8	tifs	../tifs/Snap-1034-Image Export-07.tif	5	TRUE	669.85
irld39_52	rep1	d8	tifs	../tifs/Snap-1034-Image Export-07.tif	6	TRUE	612.386
irld39_52	rep1	d8	tifs	../tifs/Snap-1066-Image Export-39.tif	1	TRUE	708.966
irld39_52	rep1	d8	tifs	../tifs/Snap-1051-Image Export-24.tif	0	TRUE	636.188
irld39_52	rep1	d8	tifs	../tifs/Snap-1051-Image Export-24.tif	1	TRUE	411.235
irld39_52	rep1	d8	tifs	../tifs/Snap-1051-Image Export-24.tif	2	TRUE	697.738
irld39_52	rep1	d8	tifs	../tifs/Snap-1037-Image Export-10.tif	0	TRUE	595.999
irld39_52	rep1	d8	tifs	../tifs/Snap-1037-Image Export-10.tif	1	TRUE	686.236
irld39_52	rep1	d8	tifs	../tifs/Snap-1037-Image Export-10.tif	4	TRUE	625.11
irld39_52	rep1	d8	tifs	../tifs/Snap-1045-Image Export-18.tif	0	TRUE	670.608
irld39_52	rep1	d8	tifs	../tifs/Snap-1045-Image Export-18.tif	1	TRUE	626.183
irld39_52	rep1	d8	tifs	../tifs/Snap-1045-Image Export-18.tif	2	TRUE	674.898
irld39_52	rep1	d8	tifs	../tifs/Snap-1039-Image Export-12.tif	0	TRUE	686.014
irld39_52	rep1	d8	tifs	../tifs/Snap-1039-Image Export-12.tif	1	TRUE	667.482
irld39_52	rep1	d8	tifs	../tifs/Snap-1039-Image Export-12.tif	2	TRUE	656.459
irld39_52	rep1	d8	tifs	../tifs/Snap-1039-Image Export-12.tif	3	TRUE	577.467
irld39_52	rep1	d8	tifs	../tifs/Snap-1046-Image Export-19.tif	0	TRUE	678.69
irld39_52	rep1	d8	tifs	../tifs/Snap-1046-Image Export-19.tif	1	TRUE	631.806
irld39_52	rep1	d8	tifs	../tifs/Snap-1046-Image Export-19.tif	2	TRUE	587.381
irld39_52	rep1	d8	tifs	../tifs/Snap-1038-Image Export-11.tif	1	TRUE	622.613
irld39_52	rep1	d8	tifs	../tifs/Snap-1038-Image Export-11.tif	3	TRUE	647.84
irld39_52	rep1	d8	tifs	../tifs/Snap-1038-Image Export-11.tif	4	TRUE	569.699
irld39_52	rep1	d8	tifs	../tifs/Snap-1058-Image Export-31.tif	1	TRUE	603.545
irld39_52	rep1	d8	tifs	../tifs/Snap-1058-Image Export-31.tif	2	TRUE	680.835
irld39_52	rep1	d8	tifs	../tifs/Snap-1058-Image Export-31.tif	4	TRUE	613.458
irld39_52	rep1	d8	tifs	../tifs/Snap-1058-Image Export-31.tif	6	TRUE	556.124
irld39_52	rep1	d8	tifs	../tifs/Snap-1058-Image Export-31.tif	7	TRUE	641.589
irld39_52	rep1	d8	tifs	../tifs/Snap-1047-Image Export-20.tif	1	TRUE	624.758
irld39_52	rep1	d8	tifs	../tifs/Snap-1047-Image Export-20.tif	2	TRUE	536.612
irld39_52	rep1	d8	tifs	../tifs/Snap-1047-Image Export-20.tif	3	TRUE	657.531
irld39_52	rep1	d8	tifs	../tifs/Snap-1059-Image Export-32.tif	0	TRUE	624.444
irld39_52	rep1	d8	tifs	../tifs/Snap-1059-Image Export-32.tif	1	TRUE	665.521
irld39_52	rep1	d8	tifs	../tifs/Snap-1059-Image Export-32.tif	2	TRUE	688.918
irld39_52	rep1	d8	tifs	../tifs/Snap-1042-Image Export-15.tif	0	TRUE	584.326
irld39_52	rep1	d8	tifs	../tifs/Snap-1043-Image Export-16.tif	1	TRUE	618.193
irld39_52	rep1	d8	tifs	../tifs/Snap-1067-Image Export-40.tif	0	TRUE	646.453
irld39_52	rep1	d8	tifs	../tifs/Snap-1041-Image Export-14.tif	0	TRUE	530.897
irld39_52	rep1	d8	tifs	../tifs/Snap-1044-Image Export-17.tif	0	TRUE	525.09
irld39_52	rep1	d8	tifs	../tifs/Snap-1044-Image Export-17.tif	1	TRUE	623.816
irld39_52	rep1	d8	tifs	../tifs/Snap-1044-Image Export-17.tif	2	TRUE	591.173
irld39_52	rep1	d8	tifs	../tifs/Snap-1036-Image Export-09.tif	2	TRUE	646.361
irld39_52	rep1	d8	tifs	../tifs/Snap-1036-Image Export-09.tif	3	TRUE	680.169
irld39_52	rep1	d8	tifs	../tifs/Snap-1036-Image Export-09.tif	4	TRUE	695.261
irld39_52	rep1	d8	tifs	../tifs/Snap-1036-Image Export-09.tif	5	TRUE	634.801
irld39_52	rep1	d8	tifs	../tifs/Snap-1036-Image Export-09.tif	6	TRUE	591.357
irld39_52	rep1	d8	tifs	../tifs/Snap-1064-Image Export-37.tif	1	TRUE	695.24
irld39_52	rep1	d8	tifs	../tifs/Snap-1064-Image Export-37.tif	8	TRUE	660.565
irld39_52	rep1	d8	tifs	../tifs/Snap-1064-Image Export-37.tif	10	TRUE	599.883
irld39_52	rep1	d8	tifs	../tifs/Snap-1064-Image Export-37.tif	11	TRUE	607.207
irld39_52	rep1	d8	tifs	../tifs/Snap-1060-Image Export-33.tif	0	TRUE	469.457
irld39_52	rep1	d8	tifs	../tifs/Snap-1060-Image Export-33.tif	1	TRUE	671.55
irld39_52	rep1	d8	tifs	../tifs/Snap-1060-Image Export-33.tif	2	TRUE	695.927
irld39_52	rep1	d8	tifs	../tifs/Snap-1070-Image Export-43.tif	1	TRUE	620.69
irld39_52	rep1	d8	tifs	../tifs/Snap-1055-Image Export-28.tif	1	TRUE	667.797
irld39_52	rep1	d8	tifs	../tifs/Snap-1055-Image Export-28.tif	2	TRUE	439.902
irld39_52	rep1	d8	tifs	../tifs/Snap-1055-Image Export-28.tif	3	TRUE	625.647
irld39_52	rep1	d8	tifs	../tifs/Snap-1055-Image Export-28.tif	4	TRUE	628.014
irld39_52	rep1	d8	tifs	../tifs/Snap-1069-Image Export-42.tif	0	TRUE	638.371
irld39_52	rep1	d8	tifs	../tifs/Snap-1069-Image Export-42.tif	1	TRUE	684.497
irld39_52	rep1	d8	tifs	../tifs/Snap-1068-Image Export-41.tif	0	TRUE	474.95
irld39_52	rep1	d8	tifs	../tifs/Snap-1063-Image Export-36.tif	2	TRUE	638.371
irld39_52	rep1	d8	tifs	../tifs/Snap-1056-Image Export-29.tif	1	TRUE	652.391
irld39_52	rep1	d8	tifs	../tifs/Snap-1056-Image Export-29.tif	2	TRUE	713.792
irld39_52	rep1	d8	tifs	../tifs/Snap-1056-Image Export-29.tif	3	TRUE	592.337
irld39_52	rep1	d8	tifs	../tifs/Snap-1061-Image Export-34.tif	0	TRUE	582.202
irld39_52	rep1	d8	tifs	../tifs/Snap-1061-Image Export-34.tif	1	TRUE	624.038
N2	rep1	d8	tifs	../tifs/Snap-1083-Image Export-13.tif	0	TRUE	631.362
N2	rep1	d8	tifs	../tifs/Snap-1081-Image Export-11.tif	0	TRUE	377.611
N2	rep1	d8	tifs	../tifs/Snap-1081-Image Export-11.tif	1	TRUE	644.178
N2	rep1	d8	tifs	../tifs/Snap-1081-Image Export-11.tif	2	TRUE	586.086
N2	rep1	d8	tifs	../tifs/Snap-1081-Image Export-11.tif	3	TRUE	611.941
N2	rep1	d8	tifs	../tifs/Snap-1080-Image Export-10.tif	1	TRUE	537.462
N2	rep1	d8	tifs	../tifs/Snap-1080-Image Export-10.tif	2	TRUE	558.714
N2	rep1	d8	tifs	../tifs/Snap-1080-Image Export-10.tif	4	TRUE	666.594
N2	rep1	d8	tifs	../tifs/Snap-1087-Image Export-17.tif	0	TRUE	604.081
N2	rep1	d8	tifs	../tifs/Snap-1086-Image Export-16.tif	0	TRUE	550.593
N2	rep1	d8	tifs	../tifs/Snap-1086-Image Export-16.tif	1	TRUE	616.047
N2	rep1	d8	tifs	../tifs/Snap-1084-Image Export-14.tif	0	TRUE	606.226
N2	rep1	d8	tifs	../tifs/Snap-1084-Image Export-14.tif	1	TRUE	613.68
N2	rep1	d8	tifs	../tifs/Snap-1072-Image Export-02.tif	0	TRUE	658.105
N2	rep1	d8	tifs	../tifs/Snap-1072-Image Export-02.tif	1	TRUE	570.68
N2	rep1	d8	tifs	../tifs/Snap-1072-Image Export-02.tif	3	TRUE	621.985
N2	rep1	d8	tifs	../tifs/Snap-1072-Image Export-02.tif	4	TRUE	685.57
N2	rep1	d8	tifs	../tifs/Snap-1071-Image Export-01.tif	2	TRUE	614.753
N2	rep1	d8	tifs	../tifs/Snap-1071-Image Export-01.tif	8	TRUE	412.843
N2	rep1	d8	tifs	../tifs/Snap-1071-Image Export-01.tif	10	TRUE	684.589
N2	rep1	d8	tifs	../tifs/Snap-1077-Image Export-07.tif	1	TRUE	553.405
N2	rep1	d8	tifs	../tifs/Snap-1077-Image Export-07.tif	2	TRUE	591.042
N2	rep1	d8	tifs	../tifs/Snap-1077-Image Export-07.tif	3	TRUE	597.202
N2	rep1	d8	tifs	../tifs/Snap-1075-Image Export-05.tif	0	TRUE	642.033
N2	rep1	d8	tifs	../tifs/Snap-1075-Image Export-05.tif	1	TRUE	590.192
N2	rep1	d8	tifs	../tifs/Snap-1103-Image Export-33.tif	5	TRUE	611.627
N2	rep1	d8	tifs	../tifs/Snap-1102-Image Export-32.tif	0	TRUE	681.908
N2	rep1	d8	tifs	../tifs/Snap-1101-Image Export-31.tif	0	TRUE	653.739
N2	rep1	d8	tifs	../tifs/Snap-1100-Image Export-30.tif	0	TRUE	596.98
N2	rep1	d8	tifs	../tifs/Snap-1105-Image Export-35.tif	2	TRUE	629.753
N2	rep1	d8	tifs	../tifs/Snap-1105-Image Export-35.tif	3	TRUE	603.009
N2	rep1	d8	tifs	../tifs/Snap-1104-Image Export-34.tif	0	TRUE	638.907
N2	rep1	d8	tifs	../tifs/Snap-1088-Image Export-18.tif	0	TRUE	590.95
N2	rep1	d8	tifs	../tifs/Snap-1088-Image Export-18.tif	1	TRUE	620.154
N2	rep1	d8	tifs	../tifs/Snap-1089-Image Export-19.tif	0	TRUE	632.212
N2	rep1	d8	tifs	../tifs/Snap-1093-Image Export-23.tif	0	TRUE	462.447
N2	rep1	d8	tifs	../tifs/Snap-1093-Image Export-23.tif	1	TRUE	621.54
N2	rep1	d8	tifs	../tifs/Snap-1093-Image Export-23.tif	3	TRUE	524.83
N2	rep1	d8	tifs	../tifs/Snap-1093-Image Export-23.tif	4	TRUE	553.627
N2	rep1	d8	tifs	../tifs/Snap-1093-Image Export-23.tif	5	TRUE	489.061
N2	rep1	d8	tifs	../tifs/Snap-1091-Image Export-21.tif	0	TRUE	581.666
N2	rep1	d8	tifs	../tifs/Snap-1078-Image Export-08.tif	1	TRUE	642.791
N2	rep1	d8	tifs	../tifs/Snap-1078-Image Export-08.tif	2	TRUE	587.511
N2	rep1	d8	tifs	../tifs/Snap-1078-Image Export-08.tif	3	TRUE	624.222
N2	rep1	d8	tifs	../tifs/Snap-1095-Image Export-25.tif	2	TRUE	578.096
N2	rep1	d8	tifs	../tifs/Snap-1079-Image Export-09.tif	5	TRUE	609.038
N2	rep1	d8	tifs	../tifs/Snap-1079-Image Export-09.tif	7	TRUE	615.733
irld39_52	rep4	d1	tifs	../tifs/Snap-98-Image Export-09.tif	0	TRUE	894.933
irld39_52	rep4	d1	tifs	../tifs/Snap-110-Image Export-21.tif	0	TRUE	926.504
irld39_52	rep4	d1	tifs	../tifs/Snap-109-Image Export-20.tif	0	TRUE	911.856
irld39_52	rep4	d1	tifs	../tifs/Snap-109-Image Export-20.tif	1	TRUE	923.822
irld39_52	rep4	d1	tifs	../tifs/Snap-109-Image Export-20.tif	2	TRUE	874.034
irld39_52	rep4	d1	tifs	../tifs/Snap-115-Image Export-26.tif	0	TRUE	990.663
irld39_52	rep4	d1	tifs	../tifs/Snap-115-Image Export-26.tif	1	TRUE	928.204
irld39_52	rep4	d1	tifs	../tifs/Snap-112-Image Export-23.tif	0	TRUE	904.754
irld39_52	rep4	d1	tifs	../tifs/Snap-112-Image Export-23.tif	1	TRUE	909.136
irld39_52	rep4	d1	tifs	../tifs/Snap-112-Image Export-23.tif	2	TRUE	908.508
irld39_52	rep4	d1	tifs	../tifs/Snap-112-Image Export-23.tif	3	TRUE	906.769
irld39_52	rep4	d1	tifs	../tifs/Snap-114-Image Export-25.tif	0	TRUE	867.745
irld39_52	rep4	d1	tifs	../tifs/Snap-114-Image Export-25.tif	1	TRUE	926.726
irld39_52	rep4	d1	tifs	../tifs/Snap-114-Image Export-25.tif	2	TRUE	917.349
irld39_52	rep4	d1	tifs	../tifs/Snap-97-Image Export-08.tif	0	TRUE	882.078
irld39_52	rep4	d1	tifs	../tifs/Snap-111-Image Export-22.tif	0	TRUE	897.262
irld39_52	rep4	d1	tifs	../tifs/Snap-111-Image Export-22.tif	1	TRUE	906.363
irld39_52	rep4	d1	tifs	../tifs/Snap-111-Image Export-22.tif	2	TRUE	953.654
irld39_52	rep4	d1	tifs	../tifs/Snap-113-Image Export-24.tif	0	TRUE	891.807
irld39_52	rep4	d1	tifs	../tifs/Snap-113-Image Export-24.tif	1	TRUE	932.088
irld39_52	rep4	d1	tifs	../tifs/Snap-113-Image Export-24.tif	2	TRUE	902.127
irld39_52	rep4	d1	tifs	../tifs/Snap-113-Image Export-24.tif	3	TRUE	921.547
irld39_52	rep4	d1	tifs	../tifs/Snap-113-Image Export-24.tif	4	TRUE	843.812
irld39_52	rep4	d1	tifs	../tifs/Snap-108-Image Export-19.tif	0	TRUE	919.088
irld39_52	rep4	d1	tifs	../tifs/Snap-108-Image Export-19.tif	1	TRUE	716.512
irld39_52	rep4	d1	tifs	../tifs/Snap-92-Image Export-03.tif	0	TRUE	928.741
irld39_52	rep4	d1	tifs	../tifs/Snap-90-Image Export-01.tif	0	TRUE	947.755
irld39_52	rep4	d1	tifs	../tifs/Snap-90-Image Export-01.tif	1	TRUE	948.475
irld39_52	rep4	d1	tifs	../tifs/Snap-90-Image Export-01.tif	3	TRUE	889.624
irld39_52	rep4	d1	tifs	../tifs/Snap-96-Image Export-07.tif	0	TRUE	875.513
irld39_52	rep4	d1	tifs	../tifs/Snap-91-Image Export-02.tif	0	TRUE	954.32
irld39_52	rep4	d1	tifs	../tifs/Snap-91-Image Export-02.tif	2	TRUE	898.151
irld39_52	rep4	d1	tifs	../tifs/Snap-91-Image Export-02.tif	4	TRUE	938.064
irld39_52	rep4	d1	tifs	../tifs/Snap-91-Image Export-02.tif	5	TRUE	925.247
irld39_52	rep4	d1	tifs	../tifs/Snap-94-Image Export-05.tif	0	TRUE	884.798
irld39_52	rep4	d1	tifs	../tifs/Snap-99-Image Export-10.tif	0	TRUE	880.063
irld39_52	rep4	d1	tifs	../tifs/Snap-103-Image Export-14.tif	0	TRUE	906.899
irld39_52	rep4	d1	tifs	../tifs/Snap-103-Image Export-14.tif	1	TRUE	926.948
irld39_52	rep4	d1	tifs	../tifs/Snap-100-Image Export-11.tif	0	TRUE	879.267
irld39_52	rep4	d1	tifs	../tifs/Snap-102-Image Export-13.tif	0	TRUE	941.595
irld39_52	rep4	d1	tifs	../tifs/Snap-102-Image Export-13.tif	1	TRUE	913.909
irld39_52	rep4	d1	tifs	../tifs/Snap-105-Image Export-16.tif	0	TRUE	905.827
irld39_52	rep4	d1	tifs	../tifs/Snap-104-Image Export-15.tif	1	TRUE	904.716
irld39_52	rep4	d1	tifs	../tifs/Snap-104-Image Export-15.tif	2	TRUE	844.165
irld39_52	rep4	d1	tifs	../tifs/Snap-104-Image Export-15.tif	3	TRUE	896.542
irld39_52	rep4	d1	tifs	../tifs/Snap-104-Image Export-15.tif	5	TRUE	771.072
irld39_52	rep4	d1	tifs	../tifs/Snap-104-Image Export-15.tif	6	TRUE	888.59
irld39_52	rep4	d1	tifs	../tifs/Snap-104-Image Export-15.tif	7	TRUE	859.885
irld39_52	rep4	d1	tifs	../tifs/Snap-101-Image Export-12.tif	0	TRUE	957.89
irld39_52	rep4	d1	tifs	../tifs/Snap-101-Image Export-12.tif	1	TRUE	903.107
irld39_52	rep4	d1	tifs	../tifs/Snap-101-Image Export-12.tif	2	TRUE	899.001
irld39_52	rep4	d1	tifs	../tifs/Snap-101-Image Export-12.tif	3	TRUE	847.604
irld39_52	rep4	d1	tifs	../tifs/Snap-101-Image Export-12.tif	4	TRUE	903.237
irld39_52	rep4	d1	tifs	../tifs/Snap-106-Image Export-17.tif	0	TRUE	890.735
N2	rep4	d1	tifs	../tifs/Snap-80-Image Export-18.tif	2	TRUE	940.431
N2	rep4	d1	tifs	../tifs/Snap-80-Image Export-18.tif	3	TRUE	832.16
N2	rep4	d1	tifs	../tifs/Snap-81-Image Export-19.tif	0	TRUE	916.905
N2	rep4	d1	tifs	../tifs/Snap-85-Image Export-23.tif	0	TRUE	955.301
N2	rep4	d1	tifs	../tifs/Snap-85-Image Export-23.tif	1	TRUE	917.885
N2	rep4	d1	tifs	../tifs/Snap-85-Image Export-23.tif	2	TRUE	899.89
N2	rep4	d1	tifs	../tifs/Snap-70-Image Export-08.tif	0	TRUE	914.537
N2	rep4	d1	tifs	../tifs/Snap-70-Image Export-08.tif	1	TRUE	914.759
N2	rep4	d1	tifs	../tifs/Snap-70-Image Export-08.tif	2	TRUE	920.919
N2	rep4	d1	tifs	../tifs/Snap-71-Image Export-09.tif	0	TRUE	956.335
N2	rep4	d1	tifs	../tifs/Snap-71-Image Export-09.tif	1	TRUE	921.547
N2	rep4	d1	tifs	../tifs/Snap-71-Image Export-09.tif	2	TRUE	918.291
N2	rep4	d1	tifs	../tifs/Snap-82-Image Export-20.tif	0	TRUE	881.006
N2	rep4	d1	tifs	../tifs/Snap-83-Image Export-21.tif	0	TRUE	862.918
N2	rep4	d1	tifs	../tifs/Snap-83-Image Export-21.tif	1	TRUE	951.01
N2	rep4	d1	tifs	../tifs/Snap-86-Image Export-24.tif	0	TRUE	916.59
N2	rep4	d1	tifs	../tifs/Snap-86-Image Export-24.tif	1	TRUE	907.121
N2	rep4	d1	tifs	../tifs/Snap-86-Image Export-24.tif	2	TRUE	976.736
N2	rep4	d1	tifs	../tifs/Snap-86-Image Export-24.tif	3	TRUE	931.996
N2	rep4	d1	tifs	../tifs/Snap-86-Image Export-24.tif	4	TRUE	921.547
N2	rep4	d1	tifs	../tifs/Snap-86-Image Export-24.tif	5	TRUE	970.17
N2	rep4	d1	tifs	../tifs/Snap-87-Image Export-25.tif	0	TRUE	966.823
N2	rep4	d1	tifs	../tifs/Snap-89-Image Export-27.tif	0	TRUE	904.624
N2	rep4	d1	tifs	../tifs/Snap-89-Image Export-27.tif	1	TRUE	972.852
N2	rep4	d1	tifs	../tifs/Snap-88-Image Export-26.tif	0	TRUE	912.928
N2	rep4	d1	tifs	../tifs/Snap-88-Image Export-26.tif	2	TRUE	772.865
N2	rep4	d1	tifs	../tifs/Snap-64-Image Export-02.tif	1	TRUE	920.697
N2	rep4	d1	tifs	../tifs/Snap-64-Image Export-02.tif	3	TRUE	902.257
N2	rep4	d1	tifs	../tifs/Snap-65-Image Export-03.tif	2	TRUE	767.817
N2	rep4	d1	tifs	../tifs/Snap-65-Image Export-03.tif	3	TRUE	940.745
N2	rep4	d1	tifs	../tifs/Snap-65-Image Export-03.tif	4	TRUE	924.765
N2	rep4	d1	tifs	../tifs/Snap-65-Image Export-03.tif	5	TRUE	914.851
N2	rep4	d1	tifs	../tifs/Snap-65-Image Export-03.tif	6	TRUE	917.977
N2	rep4	d1	tifs	../tifs/Snap-65-Image Export-03.tif	7	TRUE	954.412
N2	rep4	d1	tifs	../tifs/Snap-65-Image Export-03.tif	9	TRUE	849.083
N2	rep4	d1	tifs	../tifs/Snap-78-Image Export-16.tif	0	TRUE	577.69
N2	rep4	d1	tifs	../tifs/Snap-78-Image Export-16.tif	1	TRUE	921.899
N2	rep4	d1	tifs	../tifs/Snap-63-Image Export-01.tif	0	TRUE	929.537
N2	rep4	d1	tifs	../tifs/Snap-63-Image Export-01.tif	1	TRUE	895.469
N2	rep4	d1	tifs	../tifs/Snap-63-Image Export-01.tif	2	TRUE	896.58
N2	rep4	d1	tifs	../tifs/Snap-63-Image Export-01.tif	4	TRUE	932.977
N2	rep4	d1	tifs	../tifs/Snap-79-Image Export-17.tif	0	TRUE	775.715
N2	rep4	d1	tifs	../tifs/Snap-67-Image Export-05.tif	0	TRUE	968.247
N2	rep4	d1	tifs	../tifs/Snap-67-Image Export-05.tif	1	TRUE	930.61
N2	rep4	d1	tifs	../tifs/Snap-67-Image Export-05.tif	2	TRUE	906.991
N2	rep4	d1	tifs	../tifs/Snap-67-Image Export-05.tif	3	TRUE	884.354
N2	rep4	d1	tifs	../tifs/Snap-66-Image Export-04.tif	0	TRUE	1001.74
N2	rep4	d1	tifs	../tifs/Snap-66-Image Export-04.tif	1	TRUE	921.103
N2	rep4	d1	tifs	../tifs/Snap-66-Image Export-04.tif	2	TRUE	898.373
N2	rep4	d1	tifs	../tifs/Snap-68-Image Export-06.tif	0	TRUE	959.721
N2	rep4	d1	tifs	../tifs/Snap-68-Image Export-06.tif	1	TRUE	972.852
N2	rep4	d1	tifs	../tifs/Snap-68-Image Export-06.tif	2	TRUE	917.885
N2	rep4	d1	tifs	../tifs/Snap-68-Image Export-06.tif	3	TRUE	925.025
N2	rep4	d1	tifs	../tifs/Snap-73-Image Export-11.tif	0	TRUE	957.132
N2	rep4	d1	tifs	../tifs/Snap-73-Image Export-11.tif	1	TRUE	934.808
N2	rep4	d1	tifs	../tifs/Snap-69-Image Export-07.tif	0	TRUE	939.044
N2	rep4	d1	tifs	../tifs/Snap-69-Image Export-07.tif	1	TRUE	945.571
N2	rep4	d1	tifs	../tifs/Snap-72-Image Export-10.tif	0	TRUE	909.228
N2	rep4	d1	tifs	../tifs/Snap-72-Image Export-10.tif	2	TRUE	888.46
N2	rep4	d1	tifs	../tifs/Snap-72-Image Export-10.tif	3	TRUE	923.286
N2	rep4	d1	tifs	../tifs/Snap-76-Image Export-14.tif	0	TRUE	913.151
N2	rep4	d1	tifs	../tifs/Snap-74-Image Export-12.tif	0	TRUE	899.76
N2	rep4	d1	tifs	../tifs/Snap-74-Image Export-12.tif	1	TRUE	925.929
N2	rep4	d1	tifs	../tifs/Snap-75-Image Export-13.tif	0	TRUE	907.842
N2	rep4	d1	tifs	../tifs/Snap-75-Image Export-13.tif	1	TRUE	888.146
irld39_52	rep2	d8	tifs	../tifs/Snap-162-Image Export-10.tif	0	TRUE	679.226
irld39_52	rep2	d8	tifs	../tifs/Snap-167-Image Export-15.tif	0	TRUE	685.033
irld39_52	rep2	d8	tifs	../tifs/Snap-167-Image Export-15.tif	1	TRUE	647.304
irld39_52	rep2	d8	tifs	../tifs/Snap-167-Image Export-15.tif	2	TRUE	720.082
irld39_52	rep2	d8	tifs	../tifs/Snap-166-Image Export-14.tif	0	TRUE	644.845
irld39_52	rep2	d8	tifs	../tifs/Snap-166-Image Export-14.tif	2	TRUE	687.975
irld39_52	rep2	d8	tifs	../tifs/Snap-166-Image Export-14.tif	3	TRUE	655.516
irld39_52	rep2	d8	tifs	../tifs/Snap-166-Image Export-14.tif	4	TRUE	638.501
irld39_52	rep2	d8	tifs	../tifs/Snap-166-Image Export-14.tif	5	TRUE	764.247
irld39_52	rep2	d8	tifs	../tifs/Snap-166-Image Export-14.tif	6	TRUE	589.84
irld39_52	rep2	d8	tifs	../tifs/Snap-164-Image Export-12.tif	1	TRUE	721.469
irld39_52	rep2	d8	tifs	../tifs/Snap-164-Image Export-12.tif	3	TRUE	677.488
irld39_52	rep2	d8	tifs	../tifs/Snap-164-Image Export-12.tif	4	TRUE	682.796
irld39_52	rep2	d8	tifs	../tifs/Snap-165-Image Export-13.tif	0	TRUE	617.656
irld39_52	rep2	d8	tifs	../tifs/Snap-165-Image Export-13.tif	1	TRUE	719.101
irld39_52	rep2	d8	tifs	../tifs/Snap-165-Image Export-13.tif	3	TRUE	637.076
irld39_52	rep2	d8	tifs	../tifs/Snap-169-Image Export-17.tif	2	TRUE	778.358
irld39_52	rep2	d8	tifs	../tifs/Snap-169-Image Export-17.tif	3	TRUE	633.951
irld39_52	rep2	d8	tifs	../tifs/Snap-181-Image Export-29.tif	5	TRUE	733.657
irld39_52	rep2	d8	tifs	../tifs/Snap-180-Image Export-28.tif	0	TRUE	644.845
irld39_52	rep2	d8	tifs	../tifs/Snap-180-Image Export-28.tif	1	TRUE	595.999
irld39_52	rep2	d8	tifs	../tifs/Snap-180-Image Export-28.tif	4	TRUE	649.671
irld39_52	rep2	d8	tifs	../tifs/Snap-180-Image Export-28.tif	5	TRUE	600.733
irld39_52	rep2	d8	tifs	../tifs/Snap-180-Image Export-28.tif	6	TRUE	678.69
irld39_52	rep2	d8	tifs	../tifs/Snap-170-Image Export-18.tif	0	TRUE	598.366
irld39_52	rep2	d8	tifs	../tifs/Snap-170-Image Export-18.tif	1	TRUE	683.739
irld39_52	rep2	d8	tifs	../tifs/Snap-182-Image Export-30.tif	0	TRUE	641.497
irld39_52	rep2	d8	tifs	../tifs/Snap-182-Image Export-30.tif	1	TRUE	653.463
irld39_52	rep2	d8	tifs	../tifs/Snap-183-Image Export-31.tif	0	TRUE	678.024
irld39_52	rep2	d8	tifs	../tifs/Snap-174-Image Export-22.tif	0	TRUE	673.381
irld39_52	rep2	d8	tifs	../tifs/Snap-174-Image Export-22.tif	1	TRUE	672.975
irld39_52	rep2	d8	tifs	../tifs/Snap-186-Image Export-34.tif	0	TRUE	550.187
irld39_52	rep2	d8	tifs	../tifs/Snap-186-Image Export-34.tif	2	TRUE	708.966
irld39_52	rep2	d8	tifs	../tifs/Snap-186-Image Export-34.tif	4	TRUE	673.512
irld39_52	rep2	d8	tifs	../tifs/Snap-186-Image Export-34.tif	5	TRUE	657.975
irld39_52	rep2	d8	tifs	../tifs/Snap-159-Image Export-07.tif	1	TRUE	764.469
irld39_52	rep2	d8	tifs	../tifs/Snap-159-Image Export-07.tif	2	TRUE	502.23
irld39_52	rep2	d8	tifs	../tifs/Snap-159-Image Export-07.tif	6	TRUE	756.295
irld39_52	rep2	d8	tifs	../tifs/Snap-158-Image Export-06.tif	0	TRUE	730.087
irld39_52	rep2	d8	tifs	../tifs/Snap-185-Image Export-33.tif	2	TRUE	721.062
irld39_52	rep2	d8	tifs	../tifs/Snap-185-Image Export-33.tif	3	TRUE	654.183
irld39_52	rep2	d8	tifs	../tifs/Snap-185-Image Export-33.tif	4	TRUE	651.724
irld39_52	rep2	d8	tifs	../tifs/Snap-185-Image Export-33.tif	6	TRUE	494.332
irld39_52	rep2	d8	tifs	../tifs/Snap-185-Image Export-33.tif	7	TRUE	699.497
irld39_52	rep2	d8	tifs	../tifs/Snap-172-Image Export-20.tif	1	TRUE	670.922
irld39_52	rep2	d8	tifs	../tifs/Snap-172-Image Export-20.tif	2	TRUE	708.43
irld39_52	rep2	d8	tifs	../tifs/Snap-172-Image Export-20.tif	3	TRUE	642.569
irld39_52	rep2	d8	tifs	../tifs/Snap-172-Image Export-20.tif	4	TRUE	745.715
irld39_52	rep2	d8	tifs	../tifs/Snap-172-Image Export-20.tif	6	TRUE	614.845
irld39_52	rep2	d8	tifs	../tifs/Snap-173-Image Export-21.tif	0	TRUE	721.376
irld39_52	rep2	d8	tifs	../tifs/Snap-173-Image Export-21.tif	1	TRUE	655.478
irld39_52	rep2	d8	tifs	../tifs/Snap-177-Image Export-25.tif	0	TRUE	687.401
irld39_52	rep2	d8	tifs	../tifs/Snap-179-Image Export-27.tif	0	TRUE	669.405
irld39_52	rep2	d8	tifs	../tifs/Snap-179-Image Export-27.tif	1	TRUE	665.651
irld39_52	rep2	d8	tifs	../tifs/Snap-178-Image Export-26.tif	0	TRUE	669.405
irld39_52	rep2	d8	tifs	../tifs/Snap-178-Image Export-26.tif	1	TRUE	665.651
irld39_52	rep2	d8	tifs	../tifs/Snap-153-Image Export-01.tif	2	TRUE	648.506
irld39_52	rep2	d8	tifs	../tifs/Snap-153-Image Export-01.tif	3	TRUE	729.643
irld39_52	rep2	d8	tifs	../tifs/Snap-153-Image Export-01.tif	4	TRUE	663.154
irld39_52	rep2	d8	tifs	../tifs/Snap-156-Image Export-04.tif	4	TRUE	656.052
irld39_52	rep2	d8	tifs	../tifs/Snap-157-Image Export-05.tif	0	TRUE	676.101
irld39_52	rep2	d8	tifs	../tifs/Snap-189-Image Export-37.tif	0	TRUE	720.748
irld39_52	rep2	d8	tifs	../tifs/Snap-188-Image Export-36.tif	0	TRUE	669.497
irld39_52	rep2	d8	tifs	../tifs/Snap-188-Image Export-36.tif	2	TRUE	719.768
irld39_52	rep2	d8	tifs	../tifs/Snap-160-Image Export-08.tif	0	TRUE	676.193
irld39_52	rep2	d8	tifs	../tifs/Snap-155-Image Export-03.tif	0	TRUE	654.091
irld39_52	rep2	d8	tifs	../tifs/Snap-155-Image Export-03.tif	2	TRUE	655.96
irld39_52	rep2	d8	tifs	../tifs/Snap-155-Image Export-03.tif	3	TRUE	697.536
irld39_52	rep2	d8	tifs	../tifs/Snap-155-Image Export-03.tif	4	TRUE	732.454
irld39_52	rep2	d8	tifs	../tifs/Snap-155-Image Export-03.tif	6	TRUE	676.637
irld39_52	rep2	d8	tifs	../tifs/Snap-154-Image Export-02.tif	2	TRUE	465.351
irld39_52	rep2	d8	tifs	../tifs/Snap-154-Image Export-02.tif	4	TRUE	690.526
irld39_52	rep2	d8	tifs	../tifs/Snap-154-Image Export-02.tif	6	TRUE	745.309
irld39_52	rep2	d8	tifs	../tifs/Snap-154-Image Export-02.tif	7	TRUE	632.342
irld39_52	rep2	d8	tifs	../tifs/Snap-154-Image Export-02.tif	9	TRUE	662.396
irld39_52	rep2	d8	tifs	../tifs/Snap-154-Image Export-02.tif	10	TRUE	667.574
irld39_52	rep2	d8	tifs	../tifs/Snap-154-Image Export-02.tif	12	TRUE	644.622
irld39_52	rep2	d8	tifs	../tifs/Snap-161-Image Export-09.tif	0	TRUE	647.748
N2	rep2	d8	tifs	../tifs/Snap-128-Image Export-13.tif	0	TRUE	645.695
N2	rep2	d8	tifs	../tifs/Snap-128-Image Export-13.tif	1	TRUE	568.941
N2	rep2	d8	tifs	../tifs/Snap-149-Image Export-34.tif	0	TRUE	336.219
N2	rep2	d8	tifs	../tifs/Snap-149-Image Export-34.tif	1	TRUE	738.613
N2	rep2	d8	tifs	../tifs/Snap-150-Image Export-35.tif	0	TRUE	471.602
N2	rep2	d8	tifs	../tifs/Snap-150-Image Export-35.tif	3	TRUE	468.384
N2	rep2	d8	tifs	../tifs/Snap-150-Image Export-35.tif	5	TRUE	618.415
N2	rep2	d8	tifs	../tifs/Snap-150-Image Export-35.tif	6	TRUE	739.908
N2	rep2	d8	tifs	../tifs/Snap-150-Image Export-35.tif	7	TRUE	685.792
N2	rep2	d8	tifs	../tifs/Snap-150-Image Export-35.tif	8	TRUE	792.638
N2	rep2	d8	tifs	../tifs/Snap-150-Image Export-35.tif	9	TRUE	614.125
N2	rep2	d8	tifs	../tifs/Snap-130-Image Export-15.tif	0	TRUE	496.607
N2	rep2	d8	tifs	../tifs/Snap-130-Image Export-15.tif	1	TRUE	434.723
N2	rep2	d8	tifs	../tifs/Snap-130-Image Export-15.tif	2	TRUE	569.255
N2	rep2	d8	tifs	../tifs/Snap-130-Image Export-15.tif	3	TRUE	696.463
N2	rep2	d8	tifs	../tifs/Snap-130-Image Export-15.tif	4	TRUE	658.55
N2	rep2	d8	tifs	../tifs/Snap-130-Image Export-15.tif	5	TRUE	594.704
N2	rep2	d8	tifs	../tifs/Snap-130-Image Export-15.tif	7	TRUE	729.681
N2	rep2	d8	tifs	../tifs/Snap-129-Image Export-14.tif	0	TRUE	680.391
N2	rep2	d8	tifs	../tifs/Snap-129-Image Export-14.tif	1	TRUE	685.164
N2	rep2	d8	tifs	../tifs/Snap-148-Image Export-33.tif	1	TRUE	686.55
N2	rep2	d8	tifs	../tifs/Snap-148-Image Export-33.tif	3	TRUE	590.284
N2	rep2	d8	tifs	../tifs/Snap-148-Image Export-33.tif	4	TRUE	632.212
N2	rep2	d8	tifs	../tifs/Snap-148-Image Export-33.tif	5	TRUE	681.778
N2	rep2	d8	tifs	../tifs/Snap-148-Image Export-33.tif	6	TRUE	732.232
N2	rep2	d8	tifs	../tifs/Snap-148-Image Export-33.tif	7	TRUE	634.839
N2	rep2	d8	tifs	../tifs/Snap-148-Image Export-33.tif	8	TRUE	656.275
N2	rep2	d8	tifs	../tifs/Snap-148-Image Export-33.tif	10	TRUE	476.781
N2	rep2	d8	tifs	../tifs/Snap-131-Image Export-16.tif	0	TRUE	746.029
N2	rep2	d8	tifs	../tifs/Snap-131-Image Export-16.tif	1	TRUE	595.685
N2	rep2	d8	tifs	../tifs/Snap-131-Image Export-16.tif	3	TRUE	591.134
N2	rep2	d8	tifs	../tifs/Snap-131-Image Export-16.tif	4	TRUE	625.869
N2	rep2	d8	tifs	../tifs/Snap-131-Image Export-16.tif	7	TRUE	759.198
N2	rep2	d8	tifs	../tifs/Snap-122-Image Export-07.tif	0	TRUE	686.772
N2	rep2	d8	tifs	../tifs/Snap-122-Image Export-07.tif	1	TRUE	726.425
N2	rep2	d8	tifs	../tifs/Snap-122-Image Export-07.tif	3	TRUE	642.699
N2	rep2	d8	tifs	../tifs/Snap-122-Image Export-07.tif	5	TRUE	601.178
N2	rep2	d8	tifs	../tifs/Snap-122-Image Export-07.tif	7	TRUE	605.912
N2	rep2	d8	tifs	../tifs/Snap-122-Image Export-07.tif	8	TRUE	773.754
N2	rep2	d8	tifs	../tifs/Snap-120-Image Export-05.tif	0	TRUE	675.12
N2	rep2	d8	tifs	../tifs/Snap-121-Image Export-06.tif	0	TRUE	674.492
N2	rep2	d8	tifs	../tifs/Snap-121-Image Export-06.tif	1	TRUE	705.082
N2	rep2	d8	tifs	../tifs/Snap-121-Image Export-06.tif	3	TRUE	649.043
N2	rep2	d8	tifs	../tifs/Snap-121-Image Export-06.tif	4	TRUE	606.004
N2	rep2	d8	tifs	../tifs/Snap-147-Image Export-32.tif	0	TRUE	645.473
N2	rep2	d8	tifs	../tifs/Snap-147-Image Export-32.tif	1	TRUE	601.086
N2	rep2	d8	tifs	../tifs/Snap-147-Image Export-32.tif	5	TRUE	361.447
N2	rep2	d8	tifs	../tifs/Snap-147-Image Export-32.tif	7	TRUE	620.468
N2	rep2	d8	tifs	../tifs/Snap-147-Image Export-32.tif	8	TRUE	611.091
N2	rep2	d8	tifs	../tifs/Snap-145-Image Export-30.tif	1	TRUE	685.792
N2	rep2	d8	tifs	../tifs/Snap-145-Image Export-30.tif	2	TRUE	661.415
N2	rep2	d8	tifs	../tifs/Snap-145-Image Export-30.tif	3	TRUE	489.597
N2	rep2	d8	tifs	../tifs/Snap-145-Image Export-30.tif	4	TRUE	637.613
N2	rep2	d8	tifs	../tifs/Snap-125-Image Export-10.tif	1	TRUE	624.13
N2	rep2	d8	tifs	../tifs/Snap-125-Image Export-10.tif	2	TRUE	690.618
N2	rep2	d8	tifs	../tifs/Snap-141-Image Export-26.tif	1	TRUE	496.607
N2	rep2	d8	tifs	../tifs/Snap-141-Image Export-26.tif	3	TRUE	636.854
N2	rep2	d8	tifs	../tifs/Snap-140-Image Export-25.tif	0	TRUE	518.172
N2	rep2	d8	tifs	../tifs/Snap-140-Image Export-25.tif	2	TRUE	655.516
N2	rep2	d8	tifs	../tifs/Snap-140-Image Export-25.tif	3	TRUE	631.806
N2	rep2	d8	tifs	../tifs/Snap-142-Image Export-27.tif	0	TRUE	698.294
N2	rep2	d8	tifs	../tifs/Snap-142-Image Export-27.tif	1	TRUE	575.728
N2	rep2	d8	tifs	../tifs/Snap-124-Image Export-09.tif	0	TRUE	630.917
N2	rep2	d8	tifs	../tifs/Snap-124-Image Export-09.tif	1	TRUE	609.168
N2	rep2	d8	tifs	../tifs/Snap-143-Image Export-28.tif	0	TRUE	596.757
N2	rep2	d8	tifs	../tifs/Snap-143-Image Export-28.tif	1	TRUE	623.057
N2	rep2	d8	tifs	../tifs/Snap-144-Image Export-29.tif	1	TRUE	579.835
N2	rep2	d8	tifs	../tifs/Snap-144-Image Export-29.tif	2	TRUE	688.067
N2	rep2	d8	tifs	../tifs/Snap-144-Image Export-29.tif	7	TRUE	653.019
N2	rep2	d8	tifs	../tifs/Snap-138-Image Export-23.tif	0	TRUE	440.882
N2	rep2	d8	tifs	../tifs/Snap-138-Image Export-23.tif	1	TRUE	673.289
N2	rep2	d8	tifs	../tifs/Snap-123-Image Export-08.tif	1	TRUE	439.902
N2	rep2	d8	tifs	../tifs/Snap-123-Image Export-08.tif	3	TRUE	712.092
N2	rep2	d8	tifs	../tifs/Snap-116-Image Export-01.tif	0	TRUE	749.951
N2	rep2	d8	tifs	../tifs/Snap-116-Image Export-01.tif	8	TRUE	712.85
N2	rep2	d8	tifs	../tifs/Snap-133-Image Export-18.tif	4	TRUE	233.702
N2	rep2	d8	tifs	../tifs/Snap-133-Image Export-18.tif	5	TRUE	405.428
N2	rep2	d8	tifs	../tifs/Snap-133-Image Export-18.tif	6	TRUE	616.27
N2	rep2	d8	tifs	../tifs/Snap-133-Image Export-18.tif	7	TRUE	257.098
N2	rep2	d8	tifs	../tifs/Snap-133-Image Export-18.tif	8	TRUE	483.124
N2	rep2	d8	tifs	../tifs/Snap-135-Image Export-20.tif	0	TRUE	680.835
N2	rep2	d8	tifs	../tifs/Snap-135-Image Export-20.tif	1	TRUE	491.559
N2	rep2	d8	tifs	../tifs/Snap-137-Image Export-22.tif	0	TRUE	687.309
N2	rep2	d8	tifs	../tifs/Snap-137-Image Export-22.tif	1	TRUE	611.535
N2	rep2	d8	tifs	../tifs/Snap-119-Image Export-04.tif	0	TRUE	718.565
N2	rep2	d8	tifs	../tifs/Snap-134-Image Export-19.tif	3	TRUE	602.564
N2	rep2	d8	tifs	../tifs/Snap-134-Image Export-19.tif	6	TRUE	675.212
N2	rep2	d8	tifs	../tifs/Snap-134-Image Export-19.tif	7	TRUE	585.642
N2	rep2	d8	tifs	../tifs/Snap-134-Image Export-19.tif	9	TRUE	725.483
irld39_52	rep3	d8	tifs	../tifs/Snap-240-Image Export-11.tif	1	TRUE	674.806
irld39_52	rep3	d8	tifs	../tifs/Snap-240-Image Export-11.tif	2	TRUE	642.791
irld39_52	rep3	d8	tifs	../tifs/Snap-240-Image Export-11.tif	3	TRUE	653.371
irld39_52	rep3	d8	tifs	../tifs/Snap-238-Image Export-09.tif	0	TRUE	657.661
irld39_52	rep3	d8	tifs	../tifs/Snap-238-Image Export-09.tif	1	TRUE	682
irld39_52	rep3	d8	tifs	../tifs/Snap-238-Image Export-09.tif	2	TRUE	472.138
irld39_52	rep3	d8	tifs	../tifs/Snap-245-Image Export-16.tif	2	TRUE	635.652
irld39_52	rep3	d8	tifs	../tifs/Snap-245-Image Export-16.tif	3	TRUE	504.061
irld39_52	rep3	d8	tifs	../tifs/Snap-245-Image Export-16.tif	4	TRUE	638.777
irld39_52	rep3	d8	tifs	../tifs/Snap-245-Image Export-16.tif	5	TRUE	519.467
irld39_52	rep3	d8	tifs	../tifs/Snap-245-Image Export-16.tif	6	TRUE	617.25
irld39_52	rep3	d8	tifs	../tifs/Snap-245-Image Export-16.tif	7	TRUE	647.526
irld39_52	rep3	d8	tifs	../tifs/Snap-242-Image Export-13.tif	0	TRUE	626.497
irld39_52	rep3	d8	tifs	../tifs/Snap-242-Image Export-13.tif	1	TRUE	661.009
irld39_52	rep3	d8	tifs	../tifs/Snap-242-Image Export-13.tif	2	TRUE	597.424
irld39_52	rep3	d8	tifs	../tifs/Snap-242-Image Export-13.tif	3	TRUE	326.62
irld39_52	rep3	d8	tifs	../tifs/Snap-244-Image Export-15.tif	1	TRUE	689.99
irld39_52	rep3	d8	tifs	../tifs/Snap-244-Image Export-15.tif	2	TRUE	743.034
irld39_52	rep3	d8	tifs	../tifs/Snap-244-Image Export-15.tif	3	TRUE	674.454
irld39_52	rep3	d8	tifs	../tifs/Snap-244-Image Export-15.tif	4	TRUE	690.656
irld39_52	rep3	d8	tifs	../tifs/Snap-246-Image Export-17.tif	0	TRUE	713.164
irld39_52	rep3	d8	tifs	../tifs/Snap-246-Image Export-17.tif	1	TRUE	666.188
irld39_52	rep3	d8	tifs	../tifs/Snap-246-Image Export-17.tif	2	TRUE	686.144
irld39_52	rep3	d8	tifs	../tifs/Snap-243-Image Export-14.tif	0	TRUE	728.922
irld39_52	rep3	d8	tifs	../tifs/Snap-237-Image Export-08.tif	0	TRUE	649.893
irld39_52	rep3	d8	tifs	../tifs/Snap-231-Image Export-02.tif	0	TRUE	593.946
irld39_52	rep3	d8	tifs	../tifs/Snap-231-Image Export-02.tif	1	TRUE	652.168
irld39_52	rep3	d8	tifs	../tifs/Snap-231-Image Export-02.tif	2	TRUE	694.541
irld39_52	rep3	d8	tifs	../tifs/Snap-236-Image Export-07.tif	0	TRUE	664.671
irld39_52	rep3	d8	tifs	../tifs/Snap-236-Image Export-07.tif	1	TRUE	613.236
irld39_52	rep3	d8	tifs	../tifs/Snap-253-Image Export-24.tif	0	TRUE	696.778
irld39_52	rep3	d8	tifs	../tifs/Snap-248-Image Export-19.tif	0	TRUE	701.55
irld39_52	rep3	d8	tifs	../tifs/Snap-248-Image Export-19.tif	1	TRUE	636.854
irld39_52	rep3	d8	tifs	../tifs/Snap-248-Image Export-19.tif	3	TRUE	527.235
irld39_52	rep3	d8	tifs	../tifs/Snap-250-Image Export-21.tif	1	TRUE	693.782
irld39_52	rep3	d8	tifs	../tifs/Snap-252-Image Export-23.tif	0	TRUE	673.642
irld39_52	rep3	d8	tifs	../tifs/Snap-252-Image Export-23.tif	2	TRUE	593.724
irld39_52	rep3	d8	tifs	../tifs/Snap-255-Image Export-26.tif	0	TRUE	596.221
irld39_52	rep3	d8	tifs	../tifs/Snap-255-Image Export-26.tif	1	TRUE	577.69
irld39_52	rep3	d8	tifs	../tifs/Snap-255-Image Export-26.tif	2	TRUE	580.593
irld39_52	rep3	d8	tifs	../tifs/Snap-255-Image Export-26.tif	3	TRUE	576.487
irld39_52	rep3	d8	tifs	../tifs/Snap-233-Image Export-04.tif	0	TRUE	679.004
irld39_52	rep3	d8	tifs	../tifs/Snap-233-Image Export-04.tif	1	TRUE	632.656
irld39_52	rep3	d8	tifs	../tifs/Snap-233-Image Export-04.tif	2	TRUE	713.164
irld39_52	rep3	d8	tifs	../tifs/Snap-233-Image Export-04.tif	3	TRUE	602.879
irld39_52	rep3	d8	tifs	../tifs/Snap-233-Image Export-04.tif	4	TRUE	469.013
irld39_52	rep3	d8	tifs	../tifs/Snap-254-Image Export-25.tif	3	TRUE	638.644
irld39_52	rep3	d8	tifs	../tifs/Snap-254-Image Export-25.tif	5	TRUE	707.173
irld39_52	rep3	d8	tifs	../tifs/Snap-256-Image Export-27.tif	1	TRUE	667.981
irld39_52	rep3	d8	tifs	../tifs/Snap-247-Image Export-18.tif	1	TRUE	683.647
irld39_52	rep3	d8	tifs	../tifs/Snap-247-Image Export-18.tif	2	TRUE	694.633
irld39_52	rep3	d8	tifs	../tifs/Snap-239-Image Export-10.tif	0	TRUE	458.563
irld39_52	rep3	d8	tifs	../tifs/Snap-239-Image Export-10.tif	3	TRUE	703.473
irld39_52	rep3	d8	tifs	../tifs/Snap-239-Image Export-10.tif	4	TRUE	708.744
N2	rep3	d8	tifs	../tifs/Snap-229-Image Export-40.tif	0	TRUE	670.922
N2	rep3	d8	tifs	../tifs/Snap-223-Image Export-34.tif	1	TRUE	560.322
N2	rep3	d8	tifs	../tifs/Snap-223-Image Export-34.tif	2	TRUE	660.159
N2	rep3	d8	tifs	../tifs/Snap-193-Image Export-04.tif	0	TRUE	687.845
N2	rep3	d8	tifs	../tifs/Snap-226-Image Export-37.tif	1	TRUE	570.236
N2	rep3	d8	tifs	../tifs/Snap-226-Image Export-37.tif	2	TRUE	635.338
N2	rep3	d8	tifs	../tifs/Snap-221-Image Export-32.tif	0	TRUE	668.869
N2	rep3	d8	tifs	../tifs/Snap-221-Image Export-32.tif	2	TRUE	671.144
N2	rep3	d8	tifs	../tifs/Snap-221-Image Export-32.tif	3	TRUE	646.009
N2	rep3	d8	tifs	../tifs/Snap-224-Image Export-35.tif	5	TRUE	674.898
N2	rep3	d8	tifs	../tifs/Snap-191-Image Export-02.tif	0	TRUE	637.169
N2	rep3	d8	tifs	../tifs/Snap-225-Image Export-36.tif	1	TRUE	708.874
N2	rep3	d8	tifs	../tifs/Snap-225-Image Export-36.tif	2	TRUE	674.492
N2	rep3	d8	tifs	../tifs/Snap-225-Image Export-36.tif	4	TRUE	715.309
N2	rep3	d8	tifs	../tifs/Snap-222-Image Export-33.tif	0	TRUE	693.652
N2	rep3	d8	tifs	../tifs/Snap-222-Image Export-33.tif	1	TRUE	648.821
N2	rep3	d8	tifs	../tifs/Snap-190-Image Export-01.tif	0	TRUE	683.425
N2	rep3	d8	tifs	../tifs/Snap-220-Image Export-31.tif	0	TRUE	668.869
N2	rep3	d8	tifs	../tifs/Snap-220-Image Export-31.tif	2	TRUE	671.144
N2	rep3	d8	tifs	../tifs/Snap-220-Image Export-31.tif	3	TRUE	646.009
N2	rep3	d8	tifs	../tifs/Snap-195-Image Export-06.tif	0	TRUE	429.766
N2	rep3	d8	tifs	../tifs/Snap-195-Image Export-06.tif	1	TRUE	503.395
N2	rep3	d8	tifs	../tifs/Snap-201-Image Export-12.tif	0	TRUE	601.622
N2	rep3	d8	tifs	../tifs/Snap-206-Image Export-17.tif	0	TRUE	616.362
N2	rep3	d8	tifs	../tifs/Snap-204-Image Export-15.tif	0	TRUE	704.676
N2	rep3	d8	tifs	../tifs/Snap-204-Image Export-15.tif	1	TRUE	600.419
N2	rep3	d8	tifs	../tifs/Snap-202-Image Export-13.tif	0	TRUE	674.806
N2	rep3	d8	tifs	../tifs/Snap-199-Image Export-10.tif	0	TRUE	633.415
N2	rep3	d8	tifs	../tifs/Snap-200-Image Export-11.tif	1	TRUE	715.846
N2	rep3	d8	tifs	../tifs/Snap-218-Image Export-29.tif	1	TRUE	477.003
N2	rep3	d8	tifs	../tifs/Snap-203-Image Export-14.tif	0	TRUE	664.893
N2	rep3	d8	tifs	../tifs/Snap-219-Image Export-30.tif	0	TRUE	593.188
N2	rep3	d8	tifs	../tifs/Snap-198-Image Export-09.tif	0	TRUE	737.541
N2	rep3	d8	tifs	../tifs/Snap-228-Image Export-39.tif	0	TRUE	637.705
N2	rep3	d8	tifs	../tifs/Snap-197-Image Export-08.tif	0	TRUE	657.217
N2	rep3	d8	tifs	../tifs/Snap-227-Image Export-38.tif	0	TRUE	639.758
N2	rep3	d8	tifs	../tifs/Snap-213-Image Export-24.tif	0	TRUE	662.082
N2	rep3	d8	tifs	../tifs/Snap-213-Image Export-24.tif	2	TRUE	451.684
N2	rep3	d8	tifs	../tifs/Snap-216-Image Export-27.tif	0	TRUE	601.714
N2	rep3	d8	tifs	../tifs/Snap-216-Image Export-27.tif	1	TRUE	729.681
N2	rep3	d8	tifs	../tifs/Snap-216-Image Export-27.tif	2	TRUE	655.164
N2	rep3	d8	tifs	../tifs/Snap-211-Image Export-22.tif	0	TRUE	625.11
N2	rep3	d8	tifs	../tifs/Snap-211-Image Export-22.tif	1	TRUE	626.183
N2	rep3	d8	tifs	../tifs/Snap-215-Image Export-26.tif	0	TRUE	694.855
N2	rep3	d8	tifs	../tifs/Snap-215-Image Export-26.tif	1	TRUE	552.018
N2	rep3	d8	tifs	../tifs/Snap-215-Image Export-26.tif	2	TRUE	668.463
N2	rep3	d8	tifs	../tifs/Snap-212-Image Export-23.tif	0	TRUE	699.145
N2	rep3	d8	tifs	../tifs/Snap-212-Image Export-23.tif	1	TRUE	546.839
N2	rep3	d8	tifs	../tifs/Snap-212-Image Export-23.tif	2	TRUE	681.057
N2	rep3	d8	tifs	../tifs/Snap-209-Image Export-20.tif	0	TRUE	537.756
N2	rep3	d8	tifs	../tifs/Snap-209-Image Export-20.tif	1	TRUE	652.613
N2	rep3	d8	tifs	../tifs/Snap-209-Image Export-20.tif	2	TRUE	651.41
N2	rep3	d8	tifs	../tifs/Snap-210-Image Export-21.tif	0	TRUE	701.994
irld39_52	rep5	d1	tifs	../tifs/Snap-319-Image Export-27.tif	0	TRUE	892.75
irld39_52	rep5	d1	tifs	../tifs/Snap-318-Image Export-26.tif	1	TRUE	906.585
irld39_52	rep5	d1	tifs	../tifs/Snap-318-Image Export-26.tif	3	TRUE	836.305
irld39_52	rep5	d1	tifs	../tifs/Snap-318-Image Export-26.tif	4	TRUE	921.233
irld39_52	rep5	d1	tifs	../tifs/Snap-318-Image Export-26.tif	5	TRUE	869.392
irld39_52	rep5	d1	tifs	../tifs/Snap-300-Image Export-08.tif	1	TRUE	847.696
irld39_52	rep5	d1	tifs	../tifs/Snap-300-Image Export-08.tif	2	TRUE	864.343
irld39_52	rep5	d1	tifs	../tifs/Snap-300-Image Export-08.tif	3	TRUE	848.011
irld39_52	rep5	d1	tifs	../tifs/Snap-300-Image Export-08.tif	5	TRUE	904.604
irld39_52	rep5	d1	tifs	../tifs/Snap-301-Image Export-09.tif	1	TRUE	850.194
irld39_52	rep5	d1	tifs	../tifs/Snap-301-Image Export-09.tif	2	TRUE	893.508
irld39_52	rep5	d1	tifs	../tifs/Snap-301-Image Export-09.tif	3	TRUE	902.257
irld39_52	rep5	d1	tifs	../tifs/Snap-301-Image Export-09.tif	5	TRUE	872.701
irld39_52	rep5	d1	tifs	../tifs/Snap-301-Image Export-09.tif	7	TRUE	859.793
irld39_52	rep5	d1	tifs	../tifs/Snap-330-Image Export-38.tif	0	TRUE	881.136
irld39_52	rep5	d1	tifs	../tifs/Snap-331-Image Export-39.tif	2	TRUE	816.126
irld39_52	rep5	d1	tifs	../tifs/Snap-315-Image Export-23.tif	0	TRUE	866.136
irld39_52	rep5	d1	tifs	../tifs/Snap-315-Image Export-23.tif	1	TRUE	914.093
irld39_52	rep5	d1	tifs	../tifs/Snap-320-Image Export-28.tif	0	TRUE	847.474
irld39_52	rep5	d1	tifs	../tifs/Snap-320-Image Export-28.tif	2	TRUE	867.247
irld39_52	rep5	d1	tifs	../tifs/Snap-321-Image Export-29.tif	0	TRUE	873.46
irld39_52	rep5	d1	tifs	../tifs/Snap-321-Image Export-29.tif	1	TRUE	851.136
irld39_52	rep5	d1	tifs	../tifs/Snap-314-Image Export-22.tif	1	TRUE	896.098
irld39_52	rep5	d1	tifs	../tifs/Snap-314-Image Export-22.tif	2	TRUE	880.579
irld39_52	rep5	d1	tifs	../tifs/Snap-311-Image Export-19.tif	0	TRUE	884.982
irld39_52	rep5	d1	tifs	../tifs/Snap-316-Image Export-24.tif	0	TRUE	918.069
irld39_52	rep5	d1	tifs	../tifs/Snap-316-Image Export-24.tif	1	TRUE	815.237
irld39_52	rep5	d1	tifs	../tifs/Snap-317-Image Export-25.tif	0	TRUE	872.571
irld39_52	rep5	d1	tifs	../tifs/Snap-317-Image Export-25.tif	1	TRUE	950.214
irld39_52	rep5	d1	tifs	../tifs/Snap-317-Image Export-25.tif	2	TRUE	910.025
irld39_52	rep5	d1	tifs	../tifs/Snap-317-Image Export-25.tif	3	TRUE	897.614
irld39_52	rep5	d1	tifs	../tifs/Snap-312-Image Export-20.tif	0	TRUE	885.02
irld39_52	rep5	d1	tifs	../tifs/Snap-296-Image Export-04.tif	1	TRUE	872.387
irld39_52	rep5	d1	tifs	../tifs/Snap-296-Image Export-04.tif	2	TRUE	904.846
irld39_52	rep5	d1	tifs	../tifs/Snap-296-Image Export-04.tif	3	TRUE	861.049
irld39_52	rep5	d1	tifs	../tifs/Snap-297-Image Export-05.tif	0	TRUE	891.455
irld39_52	rep5	d1	tifs	../tifs/Snap-297-Image Export-05.tif	2	TRUE	895.914
irld39_52	rep5	d1	tifs	../tifs/Snap-297-Image Export-05.tif	3	TRUE	886.943
irld39_52	rep5	d1	tifs	../tifs/Snap-324-Image Export-32.tif	0	TRUE	888.866
irld39_52	rep5	d1	tifs	../tifs/Snap-324-Image Export-32.tif	1	TRUE	890.383
irld39_52	rep5	d1	tifs	../tifs/Snap-293-Image Export-01.tif	0	TRUE	921.991
irld39_52	rep5	d1	tifs	../tifs/Snap-293-Image Export-01.tif	1	TRUE	900.61
irld39_52	rep5	d1	tifs	../tifs/Snap-325-Image Export-33.tif	0	TRUE	917.257
irld39_52	rep5	d1	tifs	../tifs/Snap-326-Image Export-34.tif	0	TRUE	885.518
irld39_52	rep5	d1	tifs	../tifs/Snap-323-Image Export-31.tif	0	TRUE	880.155
irld39_52	rep5	d1	tifs	../tifs/Snap-323-Image Export-31.tif	2	TRUE	906.233
irld39_52	rep5	d1	tifs	../tifs/Snap-323-Image Export-31.tif	3	TRUE	920.454
irld39_52	rep5	d1	tifs	../tifs/Snap-295-Image Export-03.tif	0	TRUE	888.552
irld39_52	rep5	d1	tifs	../tifs/Snap-295-Image Export-03.tif	2	TRUE	896.19
irld39_52	rep5	d1	tifs	../tifs/Snap-294-Image Export-02.tif	1	TRUE	901.276
irld39_52	rep5	d1	tifs	../tifs/Snap-294-Image Export-02.tif	3	TRUE	689.546
irld39_52	rep5	d1	tifs	../tifs/Snap-294-Image Export-02.tif	4	TRUE	876.585
irld39_52	rep5	d1	tifs	../tifs/Snap-294-Image Export-02.tif	5	TRUE	913.557
irld39_52	rep5	d1	tifs	../tifs/Snap-308-Image Export-16.tif	0	TRUE	886.943
irld39_52	rep5	d1	tifs	../tifs/Snap-308-Image Export-16.tif	1	TRUE	889.088
irld39_52	rep5	d1	tifs	../tifs/Snap-308-Image Export-16.tif	3	TRUE	870.112
irld39_52	rep5	d1	tifs	../tifs/Snap-309-Image Export-17.tif	0	TRUE	811.614
irld39_52	rep5	d1	tifs	../tifs/Snap-307-Image Export-15.tif	0	TRUE	899.039
irld39_52	rep5	d1	tifs	../tifs/Snap-307-Image Export-15.tif	1	TRUE	840.15
irld39_52	rep5	d1	tifs	../tifs/Snap-306-Image Export-14.tif	0	TRUE	911.19
irld39_52	rep5	d1	tifs	../tifs/Snap-303-Image Export-11.tif	0	TRUE	900.518
irld39_52	rep5	d1	tifs	../tifs/Snap-302-Image Export-10.tif	1	TRUE	895.469
irld39_52	rep5	d1	tifs	../tifs/Snap-302-Image Export-10.tif	2	TRUE	810.059
irld39_52	rep5	d1	tifs	../tifs/Snap-328-Image Export-36.tif	0	TRUE	864.971
irld39_52	rep5	d1	tifs	../tifs/Snap-329-Image Export-37.tif	3	TRUE	893.194
irld39_52	rep5	d1	tifs	../tifs/Snap-304-Image Export-12.tif	0	TRUE	838.135
irld39_52	rep5	d1	tifs	../tifs/Snap-304-Image Export-12.tif	1	TRUE	878.194
irld39_52	rep5	d1	tifs	../tifs/Snap-304-Image Export-12.tif	2	TRUE	893.416
irld39_52	rep5	d1	tifs	../tifs/Snap-305-Image Export-13.tif	0	TRUE	903.866
irld39_52	rep5	d1	tifs	../tifs/Snap-299-Image Export-07.tif	2	TRUE	898.059
irld39_52	rep5	d1	tifs	../tifs/Snap-299-Image Export-07.tif	4	TRUE	884.446
irld39_52	rep5	d1	tifs	../tifs/Snap-299-Image Export-07.tif	5	TRUE	899.445
irld39_52	rep5	d1	tifs	../tifs/Snap-298-Image Export-06.tif	1	TRUE	904.18
irld39_52	rep5	d1	tifs	../tifs/Snap-298-Image Export-06.tif	2	TRUE	903.329
irld39_52	rep5	d1	tifs	../tifs/Snap-298-Image Export-06.tif	3	TRUE	888.866
irld39_52	rep5	d1	tifs	../tifs/Snap-298-Image Export-06.tif	4	TRUE	867.837
irld39_52	rep5	d1	tifs	../tifs/Snap-298-Image Export-06.tif	5	TRUE	844.701
N2	rep5	d1	tifs	../tifs/Snap-274-Image Export-18.tif	0	TRUE	881.986
N2	rep5	d1	tifs	../tifs/Snap-274-Image Export-18.tif	2	TRUE	838.412
N2	rep5	d1	tifs	../tifs/Snap-275-Image Export-19.tif	1	TRUE	913.02
N2	rep5	d1	tifs	../tifs/Snap-275-Image Export-19.tif	3	TRUE	918.866
N2	rep5	d1	tifs	../tifs/Snap-275-Image Export-19.tif	6	TRUE	909.673
N2	rep5	d1	tifs	../tifs/Snap-286-Image Export-30.tif	1	TRUE	933.957
N2	rep5	d1	tifs	../tifs/Snap-286-Image Export-30.tif	2	TRUE	910.117
N2	rep5	d1	tifs	../tifs/Snap-286-Image Export-30.tif	3	TRUE	899.353
N2	rep5	d1	tifs	../tifs/Snap-286-Image Export-30.tif	4	TRUE	902.885
N2	rep5	d1	tifs	../tifs/Snap-287-Image Export-31.tif	0	TRUE	894.305
N2	rep5	d1	tifs	../tifs/Snap-287-Image Export-31.tif	1	TRUE	869.836
N2	rep5	d1	tifs	../tifs/Snap-287-Image Export-31.tif	2	TRUE	892.972
N2	rep5	d1	tifs	../tifs/Snap-259-Image Export-03.tif	0	TRUE	936.011
N2	rep5	d1	tifs	../tifs/Snap-259-Image Export-03.tif	1	TRUE	912.928
N2	rep5	d1	tifs	../tifs/Snap-259-Image Export-03.tif	2	TRUE	906.769
N2	rep5	d1	tifs	../tifs/Snap-259-Image Export-03.tif	3	TRUE	880.025
N2	rep5	d1	tifs	../tifs/Snap-259-Image Export-03.tif	4	TRUE	861.179
N2	rep5	d1	tifs	../tifs/Snap-259-Image Export-03.tif	5	TRUE	951.509
N2	rep5	d1	tifs	../tifs/Snap-280-Image Export-24.tif	1	TRUE	927.556
N2	rep5	d1	tifs	../tifs/Snap-280-Image Export-24.tif	2	TRUE	913.465
N2	rep5	d1	tifs	../tifs/Snap-280-Image Export-24.tif	3	TRUE	914.851
N2	rep5	d1	tifs	../tifs/Snap-280-Image Export-24.tif	4	TRUE	898.059
N2	rep5	d1	tifs	../tifs/Snap-280-Image Export-24.tif	5	TRUE	857.073
N2	rep5	d1	tifs	../tifs/Snap-280-Image Export-24.tif	6	TRUE	943.518
N2	rep5	d1	tifs	../tifs/Snap-280-Image Export-24.tif	7	TRUE	927.17
N2	rep5	d1	tifs	../tifs/Snap-258-Image Export-02.tif	1	TRUE	892.214
N2	rep5	d1	tifs	../tifs/Snap-258-Image Export-02.tif	3	TRUE	907.972
N2	rep5	d1	tifs	../tifs/Snap-258-Image Export-02.tif	4	TRUE	867.875
N2	rep5	d1	tifs	../tifs/Snap-281-Image Export-25.tif	1	TRUE	911.542
N2	rep5	d1	tifs	../tifs/Snap-281-Image Export-25.tif	2	TRUE	873.904
N2	rep5	d1	tifs	../tifs/Snap-281-Image Export-25.tif	3	TRUE	951.915
N2	rep5	d1	tifs	../tifs/Snap-282-Image Export-26.tif	0	TRUE	935.88
N2	rep5	d1	tifs	../tifs/Snap-282-Image Export-26.tif	1	TRUE	848.991
N2	rep5	d1	tifs	../tifs/Snap-282-Image Export-26.tif	2	TRUE	935.788
N2	rep5	d1	tifs	../tifs/Snap-282-Image Export-26.tif	3	TRUE	915.296
N2	rep5	d1	tifs	../tifs/Snap-283-Image Export-27.tif	0	TRUE	929.315
N2	rep5	d1	tifs	../tifs/Snap-283-Image Export-27.tif	3	TRUE	918.551
N2	rep5	d1	tifs	../tifs/Snap-283-Image Export-27.tif	4	TRUE	865.508
N2	rep5	d1	tifs	../tifs/Snap-283-Image Export-27.tif	5	TRUE	910.469
N2	rep5	d1	tifs	../tifs/Snap-283-Image Export-27.tif	6	TRUE	778.266
N2	rep5	d1	tifs	../tifs/Snap-276-Image Export-20.tif	0	TRUE	874.57
N2	rep5	d1	tifs	../tifs/Snap-276-Image Export-20.tif	1	TRUE	906.233
N2	rep5	d1	tifs	../tifs/Snap-276-Image Export-20.tif	2	TRUE	895.469
N2	rep5	d1	tifs	../tifs/Snap-277-Image Export-21.tif	1	TRUE	849.527
N2	rep5	d1	tifs	../tifs/Snap-277-Image Export-21.tif	2	TRUE	864.749
N2	rep5	d1	tifs	../tifs/Snap-277-Image Export-21.tif	3	TRUE	893.416
N2	rep5	d1	tifs	../tifs/Snap-277-Image Export-21.tif	4	TRUE	924.006
N2	rep5	d1	tifs	../tifs/Snap-279-Image Export-23.tif	1	TRUE	763.028
N2	rep5	d1	tifs	../tifs/Snap-279-Image Export-23.tif	2	TRUE	884.484
N2	rep5	d1	tifs	../tifs/Snap-279-Image Export-23.tif	3	TRUE	886.092
N2	rep5	d1	tifs	../tifs/Snap-292-Image Export-36.tif	0	TRUE	890.865
N2	rep5	d1	tifs	../tifs/Snap-278-Image Export-22.tif	2	TRUE	915.426
N2	rep5	d1	tifs	../tifs/Snap-278-Image Export-22.tif	3	TRUE	924.45
N2	rep5	d1	tifs	../tifs/Snap-290-Image Export-34.tif	3	TRUE	899.223
N2	rep5	d1	tifs	../tifs/Snap-291-Image Export-35.tif	0	TRUE	888.866
N2	rep5	d1	tifs	../tifs/Snap-257-Image Export-01.tif	2	TRUE	916.59
N2	rep5	d1	tifs	../tifs/Snap-257-Image Export-01.tif	3	TRUE	864.971
N2	rep5	d1	tifs	../tifs/Snap-257-Image Export-01.tif	5	TRUE	932.663
N2	rep5	d1	tifs	../tifs/Snap-257-Image Export-01.tif	6	TRUE	932.663
N2	rep5	d1	tifs	../tifs/Snap-257-Image Export-01.tif	7	TRUE	870.87
N2	rep5	d1	tifs	../tifs/Snap-289-Image Export-33.tif	0	TRUE	910.653
N2	rep5	d1	tifs	../tifs/Snap-289-Image Export-33.tif	1	TRUE	806.933
N2	rep5	d1	tifs	../tifs/Snap-288-Image Export-32.tif	0	TRUE	928.204
N2	rep5	d1	tifs	../tifs/Snap-288-Image Export-32.tif	1	TRUE	926.726
N2	rep5	d1	tifs	../tifs/Snap-288-Image Export-32.tif	2	TRUE	896.894
N2	rep5	d1	tifs	../tifs/Snap-264-Image Export-08.tif	0	TRUE	876.141
N2	rep5	d1	tifs	../tifs/Snap-264-Image Export-08.tif	1	TRUE	877.918
N2	rep5	d1	tifs	../tifs/Snap-264-Image Export-08.tif	2	TRUE	913.557
N2	rep5	d1	tifs	../tifs/Snap-265-Image Export-09.tif	0	TRUE	906.141
N2	rep5	d1	tifs	../tifs/Snap-265-Image Export-09.tif	1	TRUE	915.832
N2	rep5	d1	tifs	../tifs/Snap-265-Image Export-09.tif	2	TRUE	885.648
N2	rep5	d1	tifs	../tifs/Snap-265-Image Export-09.tif	3	TRUE	926.948
N2	rep5	d1	tifs	../tifs/Snap-267-Image Export-11.tif	0	TRUE	871.759
N2	rep5	d1	tifs	../tifs/Snap-266-Image Export-10.tif	0	TRUE	888.46
N2	rep5	d1	tifs	../tifs/Snap-266-Image Export-10.tif	1	TRUE	884.89
N2	rep5	d1	tifs	../tifs/Snap-261-Image Export-05.tif	0	TRUE	781.078
N2	rep5	d1	tifs	../tifs/Snap-261-Image Export-05.tif	1	TRUE	897.208
N2	rep5	d1	tifs	../tifs/Snap-260-Image Export-04.tif	0	TRUE	912.706
N2	rep5	d1	tifs	../tifs/Snap-260-Image Export-04.tif	1	TRUE	942.982
N2	rep5	d1	tifs	../tifs/Snap-260-Image Export-04.tif	3	TRUE	893.286
N2	rep5	d1	tifs	../tifs/Snap-263-Image Export-07.tif	1	TRUE	885.242
N2	rep5	d1	tifs	../tifs/Snap-262-Image Export-06.tif	2	TRUE	906.991
N2	rep5	d1	tifs	../tifs/Snap-262-Image Export-06.tif	3	TRUE	879.397
N2	rep5	d1	tifs	../tifs/Snap-262-Image Export-06.tif	4	TRUE	876.493
N2	rep5	d1	tifs	../tifs/Snap-273-Image Export-17.tif	0	TRUE	946.33
N2	rep5	d1	tifs	../tifs/Snap-273-Image Export-17.tif	1	TRUE	894.175
N2	rep5	d1	tifs	../tifs/Snap-273-Image Export-17.tif	2	TRUE	859.663
N2	rep5	d1	tifs	../tifs/Snap-273-Image Export-17.tif	4	TRUE	918.291
N2	rep5	d1	tifs	../tifs/Snap-272-Image Export-16.tif	0	TRUE	929.851
N2	rep5	d1	tifs	../tifs/Snap-272-Image Export-16.tif	1	TRUE	920.454
N2	rep5	d1	tifs	../tifs/Snap-272-Image Export-16.tif	2	TRUE	886.721
N2	rep5	d1	tifs	../tifs/Snap-272-Image Export-16.tif	3	TRUE	871.315
N2	rep5	d1	tifs	../tifs/Snap-271-Image Export-15.tif	3	TRUE	853.986
N2	rep5	d1	tifs	../tifs/Snap-271-Image Export-15.tif	4	TRUE	889.624
N2	rep5	d1	tifs	../tifs/Snap-271-Image Export-15.tif	5	TRUE	897.706
N2	rep5	d1	tifs	../tifs/Snap-270-Image Export-14.tif	0	TRUE	917.441
N2	rep5	d1	tifs	../tifs/Snap-268-Image Export-12.tif	0	TRUE	906.899
N2	rep5	d1	tifs	../tifs/Snap-269-Image Export-13.tif	0	TRUE	850.822
N2	rep5	d1	tifs	../tifs/Snap-285-Image Export-29.tif	6	TRUE	925.301
N2	rep5	d1	tifs	../tifs/Snap-285-Image Export-29.tif	7	TRUE	946.46
N2	rep5	d1	tifs	../tifs/Snap-285-Image Export-29.tif	8	TRUE	932.441
N2	rep5	d1	tifs	../tifs/Snap-285-Image Export-29.tif	9	TRUE	830.682
N2	rep5	d1	tifs	../tifs/Snap-284-Image Export-28.tif	1	TRUE	855.556
N2	rep5	d1	tifs	../tifs/Snap-284-Image Export-28.tif	2	TRUE	918.107
N2	rep5	d1	tifs	../tifs/Snap-284-Image Export-28.tif	5	TRUE	872.479
irld39_52	rep4	d8	tifs	../tifs/Snap-73-Image Export-30.tif	0	TRUE	665.077
irld39_52	rep4	d8	tifs	../tifs/Snap-70-Image Export-27.tif	0	TRUE	658.067
irld39_52	rep4	d8	tifs	../tifs/Snap-70-Image Export-27.tif	1	TRUE	584.033
irld39_52	rep4	d8	tifs	../tifs/Snap-59-Image Export-16.tif	0	TRUE	670.386
irld39_52	rep4	d8	tifs	../tifs/Snap-77-Image Export-34.tif	0	TRUE	442.713
irld39_52	rep4	d8	tifs	../tifs/Snap-47-Image Export-04.tif	0	TRUE	626.941
irld39_52	rep4	d8	tifs	../tifs/Snap-68-Image Export-25.tif	1	TRUE	641.497
irld39_52	rep4	d8	tifs	../tifs/Snap-68-Image Export-25.tif	2	TRUE	709.724
irld39_52	rep4	d8	tifs	../tifs/Snap-75-Image Export-32.tif	1	TRUE	641.367
irld39_52	rep4	d8	tifs	../tifs/Snap-45-Image Export-02.tif	0	TRUE	688.067
irld39_52	rep4	d8	tifs	../tifs/Snap-45-Image Export-02.tif	1	TRUE	584.883
irld39_52	rep4	d8	tifs	../tifs/Snap-44-Image Export-01.tif	0	TRUE	694.188
irld39_52	rep4	d8	tifs	../tifs/Snap-76-Image Export-33.tif	0	TRUE	431.949
irld39_52	rep4	d8	tifs	../tifs/Snap-74-Image Export-31.tif	0	TRUE	679.449
irld39_52	rep4	d8	tifs	../tifs/Snap-74-Image Export-31.tif	1	TRUE	685.792
irld39_52	rep4	d8	tifs	../tifs/Snap-61-Image Export-18.tif	1	TRUE	597.386
irld39_52	rep4	d8	tifs	../tifs/Snap-61-Image Export-18.tif	2	TRUE	729.589
irld39_52	rep4	d8	tifs	../tifs/Snap-61-Image Export-18.tif	3	TRUE	466.554
irld39_52	rep4	d8	tifs	../tifs/Snap-61-Image Export-18.tif	4	TRUE	509.11
irld39_52	rep4	d8	tifs	../tifs/Snap-61-Image Export-18.tif	5	TRUE	629.178
irld39_52	rep4	d8	tifs	../tifs/Snap-55-Image Export-12.tif	1	TRUE	745.845
irld39_52	rep4	d8	tifs	../tifs/Snap-55-Image Export-12.tif	2	TRUE	722.135
irld39_52	rep4	d8	tifs	../tifs/Snap-65-Image Export-22.tif	0	TRUE	585.327
irld39_52	rep4	d8	tifs	../tifs/Snap-65-Image Export-22.tif	1	TRUE	364.35
irld39_52	rep4	d8	tifs	../tifs/Snap-56-Image Export-13.tif	1	TRUE	722.227
irld39_52	rep4	d8	tifs	../tifs/Snap-56-Image Export-13.tif	2	TRUE	631.454
irld39_52	rep4	d8	tifs	../tifs/Snap-64-Image Export-21.tif	0	TRUE	689.676
irld39_52	rep4	d8	tifs	../tifs/Snap-64-Image Export-21.tif	1	TRUE	712.444
irld39_52	rep4	d8	tifs	../tifs/Snap-64-Image Export-21.tif	2	TRUE	628.772
irld39_52	rep4	d8	tifs	../tifs/Snap-54-Image Export-11.tif	0	TRUE	716.068
irld39_52	rep4	d8	tifs	../tifs/Snap-54-Image Export-11.tif	1	TRUE	676.637
irld39_52	rep4	d8	tifs	../tifs/Snap-66-Image Export-23.tif	0	TRUE	689.232
irld39_52	rep4	d8	tifs	../tifs/Snap-53-Image Export-10.tif	0	TRUE	644.714
irld39_52	rep4	d8	tifs	../tifs/Snap-53-Image Export-10.tif	1	TRUE	624.888
irld39_52	rep4	d8	tifs	../tifs/Snap-53-Image Export-10.tif	2	TRUE	692.043
irld39_52	rep4	d8	tifs	../tifs/Snap-49-Image Export-06.tif	0	TRUE	575.728
irld39_52	rep4	d8	tifs	../tifs/Snap-49-Image Export-06.tif	1	TRUE	679.134
irld39_52	rep4	d8	tifs	../tifs/Snap-49-Image Export-06.tif	2	TRUE	739.686
irld39_52	rep4	d8	tifs	../tifs/Snap-63-Image Export-20.tif	0	TRUE	596.221
irld39_52	rep4	d8	tifs	../tifs/Snap-63-Image Export-20.tif	1	TRUE	597.072
irld39_52	rep4	d8	tifs	../tifs/Snap-63-Image Export-20.tif	2	TRUE	717.492
irld39_52	rep4	d8	tifs	../tifs/Snap-63-Image Export-20.tif	3	TRUE	710.039
irld39_52	rep4	d8	tifs	../tifs/Snap-63-Image Export-20.tif	4	TRUE	682.666
irld39_52	rep4	d8	tifs	../tifs/Snap-50-Image Export-07.tif	0	TRUE	599.125
irld39_52	rep4	d8	tifs	../tifs/Snap-50-Image Export-07.tif	1	TRUE	691.507
irld39_52	rep4	d8	tifs	../tifs/Snap-57-Image Export-14.tif	0	TRUE	664.763
irld39_52	rep4	d8	tifs	../tifs/Snap-78-Image Export-35.tif	0	TRUE	656.052
irld39_52	rep4	d8	tifs	../tifs/Snap-67-Image Export-24.tif	1	TRUE	701.642
irld39_52	rep4	d8	tifs	../tifs/Snap-67-Image Export-24.tif	3	TRUE	684.627
irld39_52	rep4	d8	tifs	../tifs/Snap-48-Image Export-05.tif	0	TRUE	607.429
irld39_52	rep4	d8	tifs	../tifs/Snap-51-Image Export-08.tif	0	TRUE	702.493
irld39_52	rep4	d8	tifs	../tifs/Snap-52-Image Export-09.tif	0	TRUE	658.42
irld39_52	rep4	d8	tifs	../tifs/Snap-60-Image Export-17.tif	1	TRUE	669.313
irld39_52	rep4	d8	tifs	../tifs/Snap-72-Image Export-29.tif	0	TRUE	661.545
N2	rep4	d8	tifs	../tifs/Snap-22-Image Export-22.tif	0	TRUE	579.298
N2	rep4	d8	tifs	../tifs/Snap-10-Image Export-10.tif	0	TRUE	561.395
N2	rep4	d8	tifs	../tifs/Snap-10-Image Export-10.tif	1	TRUE	709.502
N2	rep4	d8	tifs	../tifs/Snap-11-Image Export-11.tif	1	TRUE	624.444
N2	rep4	d8	tifs	../tifs/Snap-11-Image Export-11.tif	4	TRUE	490.134
N2	rep4	d8	tifs	../tifs/Snap-23-Image Export-23.tif	1	TRUE	563.226
N2	rep4	d8	tifs	../tifs/Snap-23-Image Export-23.tif	2	TRUE	434.945
N2	rep4	d8	tifs	../tifs/Snap-23-Image Export-23.tif	3	TRUE	640.516
N2	rep4	d8	tifs	../tifs/Snap-20-Image Export-20.tif	0	TRUE	667.889
N2	rep4	d8	tifs	../tifs/Snap-12-Image Export-12.tif	0	TRUE	650.115
N2	rep4	d8	tifs	../tifs/Snap-13-Image Export-13.tif	1	TRUE	460.931
N2	rep4	d8	tifs	../tifs/Snap-21-Image Export-21.tif	0	TRUE	575.951
N2	rep4	d8	tifs	../tifs/Snap-14-Image Export-14.tif	0	TRUE	586.086
N2	rep4	d8	tifs	../tifs/Snap-26-Image Export-26.tif	1	TRUE	628.864
N2	rep4	d8	tifs	../tifs/Snap-26-Image Export-26.tif	2	TRUE	493.482
N2	rep4	d8	tifs	../tifs/Snap-27-Image Export-27.tif	0	TRUE	694.947
N2	rep4	d8	tifs	../tifs/Snap-27-Image Export-27.tif	1	TRUE	607.207
N2	rep4	d8	tifs	../tifs/Snap-15-Image Export-15.tif	0	TRUE	631.584
N2	rep4	d8	tifs	../tifs/Snap-15-Image Export-15.tif	1	TRUE	570.236
N2	rep4	d8	tifs	../tifs/Snap-15-Image Export-15.tif	2	TRUE	665.966
N2	rep4	d8	tifs	../tifs/Snap-15-Image Export-15.tif	3	TRUE	528.974
N2	rep4	d8	tifs	../tifs/Snap-16-Image Export-16.tif	0	TRUE	631.898
N2	rep4	d8	tifs	../tifs/Snap-24-Image Export-24.tif	0	TRUE	589.878
N2	rep4	d8	tifs	../tifs/Snap-25-Image Export-25.tif	1	TRUE	478.168
N2	rep4	d8	tifs	../tifs/Snap-25-Image Export-25.tif	2	TRUE	553.627
N2	rep4	d8	tifs	../tifs/Snap-25-Image Export-25.tif	3	TRUE	555.772
N2	rep4	d8	tifs	../tifs/Snap-30-Image Export-30.tif	1	TRUE	565.593
N2	rep4	d8	tifs	../tifs/Snap-30-Image Export-30.tif	2	TRUE	494.776
N2	rep4	d8	tifs	../tifs/Snap-02-Image Export-02.tif	0	TRUE	579.076
N2	rep4	d8	tifs	../tifs/Snap-31-Image Export-31.tif	0	TRUE	629.308
N2	rep4	d8	tifs	../tifs/Snap-31-Image Export-31.tif	1	TRUE	681.372
N2	rep4	d8	tifs	../tifs/Snap-32-Image Export-32.tif	0	TRUE	644.4
N2	rep4	d8	tifs	../tifs/Snap-32-Image Export-32.tif	1	TRUE	589.656
N2	rep4	d8	tifs	../tifs/Snap-32-Image Export-32.tif	2	TRUE	354.437
N2	rep4	d8	tifs	../tifs/Snap-33-Image Export-33.tif	0	TRUE	640.646
N2	rep4	d8	tifs	../tifs/Snap-33-Image Export-33.tif	1	TRUE	671.773
N2	rep4	d8	tifs	../tifs/Snap-33-Image Export-33.tif	2	TRUE	517.062
N2	rep4	d8	tifs	../tifs/Snap-07-Image Export-07.tif	0	TRUE	590.95
N2	rep4	d8	tifs	../tifs/Snap-07-Image Export-07.tif	1	TRUE	316.171
N2	rep4	d8	tifs	../tifs/Snap-04-Image Export-04.tif	0	TRUE	468.032
N2	rep4	d8	tifs	../tifs/Snap-04-Image Export-04.tif	1	TRUE	507.057
N2	rep4	d8	tifs	../tifs/Snap-36-Image Export-36.tif	0	TRUE	529.51
N2	rep4	d8	tifs	../tifs/Snap-36-Image Export-36.tif	1	TRUE	465.665
N2	rep4	d8	tifs	../tifs/Snap-43-Image Export-43.tif	0	TRUE	413.51
N2	rep4	d8	tifs	../tifs/Snap-43-Image Export-43.tif	1	TRUE	636.854
N2	rep4	d8	tifs	../tifs/Snap-18-Image Export-18.tif	0	TRUE	674.27
N2	rep4	d8	tifs	../tifs/Snap-29-Image Export-29.tif	0	TRUE	455.308
N2	rep4	d8	tifs	../tifs/Snap-29-Image Export-29.tif	1	TRUE	634.395
N2	rep4	d8	tifs	../tifs/Snap-29-Image Export-29.tif	2	TRUE	601.048
N2	rep4	d8	tifs	../tifs/Snap-28-Image Export-28.tif	1	TRUE	654.85
N2	rep4	d8	tifs	../tifs/Snap-28-Image Export-28.tif	3	TRUE	597.646
N2	rep4	d8	tifs	../tifs/Snap-38-Image Export-38.tif	1	TRUE	520.318
N2	rep4	d8	tifs	../tifs/Snap-09-Image Export-09.tif	0	TRUE	328.229
N2	rep4	d8	tifs	../tifs/Snap-09-Image Export-09.tif	1	TRUE	610.333
N2	rep4	d8	tifs	../tifs/Snap-09-Image Export-09.tif	2	TRUE	689.768
N2	rep4	d8	tifs	../tifs/Snap-08-Image Export-08.tif	0	TRUE	662.618

## Sheet: Fig_4C
strain	worm_number	day_plated	replicate	hours_laying	brood
LRB444	1	d1	rep2	48-72	30
LRB444	2	d1	rep2	48-72	24
LRB444	3	d1	rep2	48-72	34
LRB444	4	d1	rep2	48-72	37
LRB444	5	d1	rep2	48-72	73
LRB444	6	d1	rep2	48-72	36
LRB444	7	d1	rep2	48-72	62
LRB444	8	d1	rep2	48-72	59
LRB444	9	d1	rep2	48-72	39
LRB444	10	d1	rep2	48-72	33
LRB444	11	d1	rep2	48-72	54
LRB444	12	d1	rep2	48-72	28
LRB444	1	d1	rep3	48-72	47
LRB444	2	d1	rep3	48-72	49
LRB444	3	d1	rep3	48-72	52
LRB444	4	d1	rep3	48-72	53
LRB444	5	d1	rep3	48-72	41
LRB444	6	d1	rep3	48-72	43
LRB444	7	d1	rep3	48-72	48
LRB444	8	d1	rep3	48-72	41
LRB444	9	d1	rep3	48-72	59
LRB444	10	d1	rep3	48-72	52
LRB444	11	d1	rep3	48-72	42
LRB444	12	d1	rep3	48-72	29
LRB444	1	d5	rep3	48-72	2
LRB444	2	d5	rep3	48-72	0
LRB444	3	d5	rep3	48-72	7
LRB444	4	d5	rep3	48-72	0
LRB444	5	d5	rep3	48-72	9
LRB444	6	d5	rep3	48-72	0
LRB444	7	d5	rep3	48-72	0
LRB444	8	d5	rep3	48-72	3
LRB444	9	d5	rep3	48-72	0
LRB444	10	d5	rep3	48-72	0
LRB444	11	d5	rep3	48-72	6
LRB444	12	d5	rep3	48-72	10
LRB444	1	d1	rep4	48-72	38
LRB444	2	d1	rep4	48-72	32
LRB444	3	d1	rep4	48-72	45
LRB444	4	d1	rep4	48-72	23
LRB444	5	d1	rep4	48-72	45
LRB444	6	d1	rep4	48-72	37
LRB444	7	d1	rep4	48-72	45
LRB444	8	d1	rep4	48-72	20
LRB444	9	d1	rep4	48-72	38
LRB444	10	d1	rep4	48-72	40
LRB444	11	d1	rep4	48-72	0
LRB444	12	d1	rep4	48-72	35
LRB444	1	d5	rep4	48-72	9
LRB444	2	d5	rep4	48-72	30
LRB444	3	d5	rep4	48-72	0
LRB444	4	d5	rep4	48-72	27
LRB444	5	d5	rep4	48-72	35
LRB444	6	d5	rep4	48-72	27
LRB444	7	d5	rep4	48-72	28
LRB444	8	d5	rep4	48-72	21
LRB444	9	d5	rep4	48-72	17
LRB444	10	d5	rep4	48-72	22
LRB444	11	d5	rep4	48-72	18
LRB444	12	d5	rep4	48-72	25
LRB444	1	d1	rep1	48-72	43
LRB444	2	d1	rep1	48-72	40
LRB444	3	d1	rep1	48-72	39
LRB444	4	d1	rep1	48-72	38
LRB444	5	d1	rep1	48-72	45
LRB444	6	d1	rep1	48-72	17
LRB444	7	d1	rep1	48-72	57
LRB444	8	d1	rep1	48-72	17
LRB444	9	d1	rep1	48-72	41
LRB444	10	d1	rep1	48-72	32
LRB444	11	d1	rep1	48-72	0
LRB444	12	d1	rep1	48-72	55
LRB444	1	d5	rep1	48-72	0
LRB444	2	d5	rep1	48-72	0
LRB444	3	d5	rep1	48-72	0
LRB444	4	d5	rep1	48-72	21
LRB444	5	d5	rep1	48-72	21
LRB444	6	d5	rep1	48-72	11
LRB444	7	d5	rep1	48-72	12
LRB444	8	d5	rep1	48-72	0
LRB444	9	d5	rep1	48-72	7
LRB444	10	d5	rep1	48-72	21
LRB444	11	d5	rep1	48-72	19
LRB444	12	d5	rep1	48-72	2
N2	1	d1	rep2	48-72	37
N2	2	d1	rep2	48-72	35
N2	3	d1	rep2	48-72	31
N2	4	d1	rep2	48-72	43
N2	5	d1	rep2	48-72	23
N2	6	d1	rep2	48-72	25
N2	7	d1	rep2	48-72	16
N2	8	d1	rep2	48-72	38
N2	9	d1	rep2	48-72	29
N2	10	d1	rep2	48-72	42
N2	11	d1	rep2	48-72	38
N2	12	d1	rep2	48-72	5
N2	1	d1	rep3	48-72	49
N2	2	d1	rep3	48-72	35
N2	3	d1	rep3	48-72	37
N2	4	d1	rep3	48-72	38
N2	5	d1	rep3	48-72	49
N2	6	d1	rep3	48-72	36
N2	7	d1	rep3	48-72	27
N2	8	d1	rep3	48-72	58
N2	9	d1	rep3	48-72	35
N2	10	d1	rep3	48-72	51
N2	11	d1	rep3	48-72	36
N2	12	d1	rep3	48-72	46
N2	1	d5	rep3	48-72	0
N2	2	d5	rep3	48-72	0
N2	3	d5	rep3	48-72	14
N2	4	d5	rep3	48-72	4
N2	5	d5	rep3	48-72	0
N2	6	d5	rep3	48-72	7
N2	7	d5	rep3	48-72	0
N2	8	d5	rep3	48-72	0
N2	9	d5	rep3	48-72	0
N2	10	d5	rep3	48-72	2
N2	11	d5	rep3	48-72	8
N2	12	d5	rep3	48-72	0
N2	1	d1	rep4	48-72	70
N2	2	d1	rep4	48-72	54
N2	3	d1	rep4	48-72	54
N2	4	d1	rep4	48-72	35
N2	5	d1	rep4	48-72	47
N2	6	d1	rep4	48-72	42
N2	7	d1	rep4	48-72	57
N2	8	d1	rep4	48-72	67
N2	9	d1	rep4	48-72	53
N2	10	d1	rep4	48-72	48
N2	11	d1	rep4	48-72	56
N2	12	d1	rep4	48-72	20
N2	1	d5	rep4	48-72	0
N2	2	d5	rep4	48-72	0
N2	3	d5	rep4	48-72	28
N2	4	d5	rep4	48-72	19
N2	5	d5	rep4	48-72	20
N2	6	d5	rep4	48-72	0
N2	7	d5	rep4	48-72	11
N2	8	d5	rep4	48-72	9
N2	9	d5	rep4	48-72	2
N2	10	d5	rep4	48-72	5
N2	11	d5	rep4	48-72	0
N2	12	d5	rep4	48-72	0
N2	1	d1	rep1	48-72	62
N2	2	d1	rep1	48-72	63
N2	3	d1	rep1	48-72	43
N2	4	d1	rep1	48-72	58
N2	5	d1	rep1	48-72	62
N2	6	d1	rep1	48-72	48
N2	7	d1	rep1	48-72	43
N2	8	d1	rep1	48-72	41
N2	9	d1	rep1	48-72	52
N2	10	d1	rep1	48-72	43
N2	11	d1	rep1	48-72	45
N2	12	d1	rep1	48-72	69
N2	1	d5	rep1	48-72	0
N2	2	d5	rep1	48-72	9
N2	3	d5	rep1	48-72	0
N2	4	d5	rep1	48-72	25
N2	5	d5	rep1	48-72	0
N2	6	d5	rep1	48-72	19
N2	7	d5	rep1	48-72	1
N2	8	d5	rep1	48-72	5
N2	9	d5	rep1	48-72	0
N2	10	d5	rep1	48-72	0
N2	11	d5	rep1	48-72	25
N2	12	d5	rep1	48-72	3

## Sheet: Fig_4D
strain	day	replicate	imageFile	id	pass	length
CF1038	d1	r1	../d1_r1_triple/CF1038_d1_r1/Snap-403-Image Export-29.tif	2	TRUE	723.966
CF1038	d1	r1	../d1_r1_triple/CF1038_d1_r1/Snap-403-Image Export-29.tif	4	TRUE	722.893
CF1038	d1	r1	../d1_r1_triple/CF1038_d1_r1/Snap-403-Image Export-29.tif	7	TRUE	751.338
CF1038	d1	r1	../d1_r1_triple/CF1038_d1_r1/Snap-403-Image Export-29.tif	9	TRUE	734.637
CF1038	d1	r1	../d1_r1_triple/CF1038_d1_r1/Snap-402-Image Export-28.tif	1	TRUE	745.401
CF1038	d1	r1	../d1_r1_triple/CF1038_d1_r1/Snap-402-Image Export-28.tif	2	TRUE	725.667
CF1038	d1	r1	../d1_r1_triple/CF1038_d1_r1/Snap-402-Image Export-28.tif	3	TRUE	755
CF1038	d1	r1	../d1_r1_triple/CF1038_d1_r1/Snap-391-Image Export-17.tif	1	TRUE	724.816
CF1038	d1	r1	../d1_r1_triple/CF1038_d1_r1/Snap-391-Image Export-17.tif	3	TRUE	715.439
CF1038	d1	r1	../d1_r1_triple/CF1038_d1_r1/Snap-391-Image Export-17.tif	4	TRUE	753.261
CF1038	d1	r1	../d1_r1_triple/CF1038_d1_r1/Snap-390-Image Export-16.tif	0	TRUE	765.005
CF1038	d1	r1	../d1_r1_triple/CF1038_d1_r1/Snap-389-Image Export-15.tif	0	TRUE	742.72
CF1038	d1	r1	../d1_r1_triple/CF1038_d1_r1/Snap-389-Image Export-15.tif	1	TRUE	742.275
CF1038	d1	r1	../d1_r1_triple/CF1038_d1_r1/Snap-389-Image Export-15.tif	2	TRUE	744.643
CF1038	d1	r1	../d1_r1_triple/CF1038_d1_r1/Snap-389-Image Export-15.tif	3	TRUE	749.377
CF1038	d1	r1	../d1_r1_triple/CF1038_d1_r1/Snap-389-Image Export-15.tif	5	TRUE	724.816
CF1038	d1	r1	../d1_r1_triple/CF1038_d1_r1/Snap-388-Image Export-14.tif	0	TRUE	736.116
CF1038	d1	r1	../d1_r1_triple/CF1038_d1_r1/Snap-388-Image Export-14.tif	1	TRUE	682.482
CF1038	d1	r1	../d1_r1_triple/CF1038_d1_r1/Snap-388-Image Export-14.tif	2	TRUE	813.406
CF1038	d1	r1	../d1_r1_triple/CF1038_d1_r1/Snap-385-Image Export-11.tif	0	TRUE	727.091
CF1038	d1	r1	../d1_r1_triple/CF1038_d1_r1/Snap-385-Image Export-11.tif	1	TRUE	747.898
CF1038	d1	r1	../d1_r1_triple/CF1038_d1_r1/Snap-385-Image Export-11.tif	2	TRUE	820.232
CF1038	d1	r1	../d1_r1_triple/CF1038_d1_r1/Snap-385-Image Export-11.tif	3	TRUE	770.536
CF1038	d1	r1	../d1_r1_triple/CF1038_d1_r1/Snap-385-Image Export-11.tif	5	TRUE	742.498
CF1038	d1	r1	../d1_r1_triple/CF1038_d1_r1/Snap-385-Image Export-11.tif	6	TRUE	792.395
CF1038	d1	r1	../d1_r1_triple/CF1038_d1_r1/Snap-385-Image Export-11.tif	8	TRUE	717.4
CF1038	d1	r1	../d1_r1_triple/CF1038_d1_r1/Snap-384-Image Export-10.tif	1	TRUE	701.42
CF1038	d1	r1	../d1_r1_triple/CF1038_d1_r1/Snap-384-Image Export-10.tif	3	TRUE	824.744
CF1038	d1	r1	../d1_r1_triple/CF1038_d1_r1/Snap-384-Image Export-10.tif	4	TRUE	805.232
CF1038	d1	r1	../d1_r1_triple/CF1038_d1_r1/Snap-384-Image Export-10.tif	5	TRUE	720.396
CF1038	d1	r1	../d1_r1_triple/CF1038_d1_r1/Snap-384-Image Export-10.tif	6	TRUE	730.884
CF1038	d1	r1	../d1_r1_triple/CF1038_d1_r1/Snap-384-Image Export-10.tif	8	TRUE	739.058
CF1038	d1	r1	../d1_r1_triple/CF1038_d1_r1/Snap-384-Image Export-10.tif	9	TRUE	764.285
CF1038	d1	r1	../d1_r1_triple/CF1038_d1_r1/Snap-384-Image Export-10.tif	12	TRUE	771.609
CF1038	d1	r1	../d1_r1_triple/CF1038_d1_r1/Snap-384-Image Export-10.tif	13	TRUE	766.652
CF1038	d1	r1	../d1_r1_triple/CF1038_d1_r1/Snap-384-Image Export-10.tif	14	TRUE	774.29
CF1038	d1	r1	../d1_r1_triple/CF1038_d1_r1/Snap-386-Image Export-12.tif	0	TRUE	756.961
CF1038	d1	r1	../d1_r1_triple/CF1038_d1_r1/Snap-386-Image Export-12.tif	1	TRUE	744.865
CF1038	d1	r1	../d1_r1_triple/CF1038_d1_r1/Snap-386-Image Export-12.tif	2	TRUE	734.101
CF1038	d1	r1	../d1_r1_triple/CF1038_d1_r1/Snap-386-Image Export-12.tif	3	TRUE	723.115
CF1038	d1	r1	../d1_r1_triple/CF1038_d1_r1/Snap-386-Image Export-12.tif	5	TRUE	752.319
CF1038	d1	r1	../d1_r1_triple/CF1038_d1_r1/Snap-386-Image Export-12.tif	8	TRUE	724.594
CF1038	d1	r1	../d1_r1_triple/CF1038_d1_r1/Snap-381-Image Export-07.tif	0	TRUE	740.424
CF1038	d1	r1	../d1_r1_triple/CF1038_d1_r1/Snap-381-Image Export-07.tif	1	TRUE	703.917
CF1038	d1	r1	../d1_r1_triple/CF1038_d1_r1/Snap-381-Image Export-07.tif	2	TRUE	756.476
CF1038	d1	r1	../d1_r1_triple/CF1038_d1_r1/Snap-381-Image Export-07.tif	4	TRUE	692.449
CF1038	d1	r1	../d1_r1_triple/CF1038_d1_r1/Snap-380-Image Export-06.tif	1	TRUE	768.613
CF1038	d1	r1	../d1_r1_triple/CF1038_d1_r1/Snap-380-Image Export-06.tif	2	TRUE	714.589
CF1038	d1	r1	../d1_r1_triple/CF1038_d1_r1/Snap-380-Image Export-06.tif	4	TRUE	774.068
CF1038	d1	r1	../d1_r1_triple/CF1038_d1_r1/Snap-380-Image Export-06.tif	6	TRUE	773.716
CF1038	d1	r1	../d1_r1_triple/CF1038_d1_r1/Snap-377-Image Export-03.tif	0	TRUE	692.357
CF1038	d1	r1	../d1_r1_triple/CF1038_d1_r1/Snap-376-Image Export-02.tif	0	TRUE	757.367
CF1038	d1	r1	../d1_r1_triple/CF1038_d1_r1/Snap-383-Image Export-09.tif	1	TRUE	771.479
CF1038	d1	r1	../d1_r1_triple/CF1038_d1_r1/Snap-383-Image Export-09.tif	3	TRUE	750.135
CF1038	d1	r1	../d1_r1_triple/CF1038_d1_r1/Snap-383-Image Export-09.tif	4	TRUE	743.126
CF1038	d1	r1	../d1_r1_triple/CF1038_d1_r1/Snap-383-Image Export-09.tif	5	TRUE	738.077
CF1038	d1	r1	../d1_r1_triple/CF1038_d1_r1/Snap-383-Image Export-09.tif	6	TRUE	749.285
CF1038	d1	r1	../d1_r1_triple/CF1038_d1_r1/Snap-382-Image Export-08.tif	1	TRUE	787.681
CF1038	d1	r1	../d1_r1_triple/CF1038_d1_r1/Snap-382-Image Export-08.tif	2	TRUE	753.261
CF1038	d1	r1	../d1_r1_triple/CF1038_d1_r1/Snap-382-Image Export-08.tif	5	TRUE	764.155
CF1038	d1	r1	../d1_r1_triple/CF1038_d1_r1/Snap-382-Image Export-08.tif	6	TRUE	758.218
CF1038	d1	r1	../d1_r1_triple/CF1038_d1_r1/Snap-382-Image Export-08.tif	7	TRUE	626.627
CF1038	d1	r1	../d1_r1_triple/CF1038_d1_r1/Snap-382-Image Export-08.tif	8	TRUE	731.068
CF1038	d1	r1	../d1_r1_triple/CF1038_d1_r1/Snap-382-Image Export-08.tif	11	TRUE	743.478
CF1038	d1	r1	../d1_r1_triple/CF1038_d1_r1/Snap-398-Image Export-24.tif	1	TRUE	761.159
CF1038	d1	r1	../d1_r1_triple/CF1038_d1_r1/Snap-399-Image Export-25.tif	0	TRUE	738.836
CF1038	d1	r1	../d1_r1_triple/CF1038_d1_r1/Snap-399-Image Export-25.tif	1	TRUE	670.608
CF1038	d1	r1	../d1_r1_triple/CF1038_d1_r1/Snap-399-Image Export-25.tif	2	TRUE	717.715
CF1038	d1	r1	../d1_r1_triple/CF1038_d1_r1/Snap-399-Image Export-25.tif	3	TRUE	770.092
CF1038	d1	r1	../d1_r1_triple/CF1038_d1_r1/Snap-406-Image Export-32.tif	0	TRUE	757.812
CF1038	d1	r1	../d1_r1_triple/CF1038_d1_r1/Snap-406-Image Export-32.tif	1	TRUE	786.923
CF1038	d1	r1	../d1_r1_triple/CF1038_d1_r1/Snap-406-Image Export-32.tif	2	TRUE	726.241
CF1038	d1	r1	../d1_r1_triple/CF1038_d1_r1/Snap-406-Image Export-32.tif	3	TRUE	718.029
CF1038	d1	r1	../d1_r1_triple/CF1038_d1_r1/Snap-406-Image Export-32.tif	6	TRUE	777.102
CF1038	d1	r1	../d1_r1_triple/CF1038_d1_r1/Snap-405-Image Export-31.tif	1	TRUE	737.005
CF1038	d1	r1	../d1_r1_triple/CF1038_d1_r1/Snap-405-Image Export-31.tif	3	TRUE	701.42
CF1038	d1	r1	../d1_r1_triple/CF1038_d1_r1/Snap-405-Image Export-31.tif	4	TRUE	762.638
CF1038	d1	r1	../d1_r1_triple/CF1038_d1_r1/Snap-405-Image Export-31.tif	6	TRUE	714.497
CF1038	d1	r1	../d1_r1_triple/CF1038_d1_r1/Snap-405-Image Export-31.tif	7	TRUE	730.401
CF1038	d1	r1	../d1_r1_triple/CF1038_d1_r1/Snap-405-Image Export-31.tif	8	TRUE	800.054
CF1038	d1	r1	../d1_r1_triple/CF1038_d1_r1/Snap-404-Image Export-30.tif	1	TRUE	711.333
CF1038	d1	r1	../d1_r1_triple/CF1038_d1_r1/Snap-404-Image Export-30.tif	2	TRUE	769.87
CF1038	d1	r1	../d1_r1_triple/CF1038_d1_r1/Snap-404-Image Export-30.tif	3	TRUE	734.415
CF1038	d1	r1	../d1_r1_triple/CF1038_d1_r1/Snap-404-Image Export-30.tif	5	TRUE	684.091
CF1038	d1	r1	../d1_r1_triple/CF1038_d1_r1/Snap-404-Image Export-30.tif	6	TRUE	849.121
CF1038	d1	r1	../d1_r1_triple/CF1038_d1_r1/Snap-404-Image Export-30.tif	7	TRUE	661.231
CF1038	d1	r1	../d1_r1_triple/CF1038_d1_r1/Snap-393-Image Export-19.tif	2	TRUE	669.405
CF1038	d1	r1	../d1_r1_triple/CF1038_d1_r1/Snap-393-Image Export-19.tif	3	TRUE	701.956
CF1038	d1	r1	../d1_r1_triple/CF1038_d1_r1/Snap-393-Image Export-19.tif	6	TRUE	734.323
CF1038	d1	r1	../d1_r1_triple/CF1038_d1_r1/Snap-393-Image Export-19.tif	7	TRUE	761.159
CF1038	d1	r1	../d1_r1_triple/CF1038_d1_r1/Snap-394-Image Export-20.tif	1	TRUE	766.208
CF1038	d1	r1	../d1_r1_triple/CF1038_d1_r1/Snap-394-Image Export-20.tif	3	TRUE	738.261
CF1038	d1	r1	../d1_r1_triple/CF1038_d1_r1/Snap-394-Image Export-20.tif	4	TRUE	746.788
CF1038	d1	r1	../d1_r1_triple/CF1038_d1_r1/Snap-395-Image Export-21.tif	0	TRUE	767.28
CF1038	d1	r1	../d1_r1_triple/CF1038_d1_r1/Snap-395-Image Export-21.tif	1	TRUE	725.889
CF1038	d1	r1	../d1_r1_triple/CF1038_d1_r1/Snap-395-Image Export-21.tif	2	TRUE	819.344
CF1038	d1	r1	../d1_r1_triple/CF1038_d1_r1/Snap-395-Image Export-21.tif	3	TRUE	741.961
CF1038	d1	r1	../d1_r1_triple/CF1038_d1_r1/Snap-392-Image Export-18.tif	0	TRUE	737.005
CF1038	d1	r1	../d1_r1_triple/CF1038_d1_r1/Snap-392-Image Export-18.tif	1	TRUE	749.729
CF1038	d1	r1	../d1_r1_triple/CF1038_d1_r1/Snap-392-Image Export-18.tif	2	TRUE	772.053
CF1038	d1	r1	../d1_r1_triple/CF1038_d1_r1/Snap-392-Image Export-18.tif	3	TRUE	726.111
CF1038	d1	r1	../d1_r1_triple/CF1038_d1_r1/Snap-392-Image Export-18.tif	4	TRUE	699.811
CF1038	d1	r1	../d1_r1_triple/CF1038_d1_r1/Snap-392-Image Export-18.tif	5	TRUE	836.489
CF1038	d1	r1	../d1_r1_triple/CF1038_d1_r1/Snap-401-Image Export-27.tif	0	TRUE	613.55
CF1038	d1	r1	../d1_r1_triple/CF1038_d1_r1/Snap-401-Image Export-27.tif	1	TRUE	747.676
CF1038	d1	r1	../d1_r1_triple/CF1038_d1_r1/Snap-401-Image Export-27.tif	2	TRUE	768.705
CF1038	d1	r1	../d1_r1_triple/CF1038_d1_r1/Snap-401-Image Export-27.tif	3	TRUE	774.826
CF1038	d1	r1	../d1_r1_triple/CF1038_d1_r1/Snap-401-Image Export-27.tif	4	TRUE	681.372
CF1038	d1	r1	../d1_r1_triple/CF1038_d1_r1/Snap-401-Image Export-27.tif	5	TRUE	852.339
CF1038	d1	r1	../d1_r1_triple/CF1038_d1_r1/Snap-401-Image Export-27.tif	6	TRUE	732.492
CF1038	d1	r1	../d1_r1_triple/CF1038_d1_r1/Snap-401-Image Export-27.tif	7	TRUE	733.527
CF1038	d1	r1	../d1_r1_triple/CF1038_d1_r1/Snap-397-Image Export-23.tif	0	TRUE	836.933
CF1038	d1	r1	../d1_r1_triple/CF1038_d1_r1/Snap-397-Image Export-23.tif	1	TRUE	760.715
CF1038	d1	r1	../d1_r1_triple/CF1038_d1_r1/Snap-397-Image Export-23.tif	2	TRUE	684.183
CF1038	d1	r1	../d1_r1_triple/CF1038_d1_r1/Snap-400-Image Export-26.tif	1	TRUE	726.739
LRB444	d1	r1	../d1_r1_triple/LRB444_d1_r1/Snap-420-Image Export-46.tif	0	TRUE	740.444
LRB444	d1	r1	../d1_r1_triple/LRB444_d1_r1/Snap-420-Image Export-46.tif	2	TRUE	828.222
LRB444	d1	r1	../d1_r1_triple/LRB444_d1_r1/Snap-420-Image Export-46.tif	3	TRUE	764.691
LRB444	d1	r1	../d1_r1_triple/LRB444_d1_r1/Snap-420-Image Export-46.tif	4	TRUE	836.581
LRB444	d1	r1	../d1_r1_triple/LRB444_d1_r1/Snap-421-Image Export-47.tif	0	TRUE	744.106
LRB444	d1	r1	../d1_r1_triple/LRB444_d1_r1/Snap-421-Image Export-47.tif	1	TRUE	841.261
LRB444	d1	r1	../d1_r1_triple/LRB444_d1_r1/Snap-421-Image Export-47.tif	2	TRUE	824.614
LRB444	d1	r1	../d1_r1_triple/LRB444_d1_r1/Snap-421-Image Export-47.tif	3	TRUE	812.778
LRB444	d1	r1	../d1_r1_triple/LRB444_d1_r1/Snap-421-Image Export-47.tif	4	TRUE	844.701
LRB444	d1	r1	../d1_r1_triple/LRB444_d1_r1/Snap-421-Image Export-47.tif	5	TRUE	756.961
LRB444	d1	r1	../d1_r1_triple/LRB444_d1_r1/Snap-446-Image Export-72.tif	0	TRUE	738.169
LRB444	d1	r1	../d1_r1_triple/LRB444_d1_r1/Snap-446-Image Export-72.tif	1	TRUE	695.261
LRB444	d1	r1	../d1_r1_triple/LRB444_d1_r1/Snap-446-Image Export-72.tif	2	TRUE	852.783
LRB444	d1	r1	../d1_r1_triple/LRB444_d1_r1/Snap-445-Image Export-71.tif	0	TRUE	865.063
LRB444	d1	r1	../d1_r1_triple/LRB444_d1_r1/Snap-445-Image Export-71.tif	1	TRUE	770.406
LRB444	d1	r1	../d1_r1_triple/LRB444_d1_r1/Snap-444-Image Export-70.tif	1	TRUE	808.174
LRB444	d1	r1	../d1_r1_triple/LRB444_d1_r1/Snap-425-Image Export-51.tif	0	TRUE	748.749
LRB444	d1	r1	../d1_r1_triple/LRB444_d1_r1/Snap-425-Image Export-51.tif	1	TRUE	719.952
LRB444	d1	r1	../d1_r1_triple/LRB444_d1_r1/Snap-425-Image Export-51.tif	2	TRUE	751.782
LRB444	d1	r1	../d1_r1_triple/LRB444_d1_r1/Snap-441-Image Export-67.tif	0	TRUE	740.222
LRB444	d1	r1	../d1_r1_triple/LRB444_d1_r1/Snap-440-Image Export-66.tif	0	TRUE	689.362
LRB444	d1	r1	../d1_r1_triple/LRB444_d1_r1/Snap-440-Image Export-66.tif	1	TRUE	738.521
LRB444	d1	r1	../d1_r1_triple/LRB444_d1_r1/Snap-427-Image Export-53.tif	0	TRUE	804.788
LRB444	d1	r1	../d1_r1_triple/LRB444_d1_r1/Snap-427-Image Export-53.tif	3	TRUE	847.382
LRB444	d1	r1	../d1_r1_triple/LRB444_d1_r1/Snap-449-Image Export-75.tif	0	TRUE	811.706
LRB444	d1	r1	../d1_r1_triple/LRB444_d1_r1/Snap-449-Image Export-75.tif	1	TRUE	754.15
LRB444	d1	r1	../d1_r1_triple/LRB444_d1_r1/Snap-449-Image Export-75.tif	2	TRUE	717.899
LRB444	d1	r1	../d1_r1_triple/LRB444_d1_r1/Snap-449-Image Export-75.tif	3	TRUE	833.677
LRB444	d1	r1	../d1_r1_triple/LRB444_d1_r1/Snap-448-Image Export-74.tif	0	TRUE	744.957
LRB444	d1	r1	../d1_r1_triple/LRB444_d1_r1/Snap-448-Image Export-74.tif	1	TRUE	811.077
LRB444	d1	r1	../d1_r1_triple/LRB444_d1_r1/Snap-448-Image Export-74.tif	2	TRUE	735.488
LRB444	d1	r1	../d1_r1_triple/LRB444_d1_r1/Snap-448-Image Export-74.tif	4	TRUE	756.203
LRB444	d1	r1	../d1_r1_triple/LRB444_d1_r1/Snap-448-Image Export-74.tif	5	TRUE	806.083
LRB444	d1	r1	../d1_r1_triple/LRB444_d1_r1/Snap-451-Image Export-77.tif	0	TRUE	715.792
LRB444	d1	r1	../d1_r1_triple/LRB444_d1_r1/Snap-451-Image Export-77.tif	1	TRUE	712.628
LRB444	d1	r1	../d1_r1_triple/LRB444_d1_r1/Snap-450-Image Export-76.tif	1	TRUE	820.86
LRB444	d1	r1	../d1_r1_triple/LRB444_d1_r1/Snap-450-Image Export-76.tif	2	TRUE	814.073
LRB444	d1	r1	../d1_r1_triple/LRB444_d1_r1/Snap-450-Image Export-76.tif	3	TRUE	811.836
LRB444	d1	r1	../d1_r1_triple/LRB444_d1_r1/Snap-450-Image Export-76.tif	4	TRUE	761.251
LRB444	d1	r1	../d1_r1_triple/LRB444_d1_r1/Snap-450-Image Export-76.tif	5	TRUE	789.382
LRB444	d1	r1	../d1_r1_triple/LRB444_d1_r1/Snap-430-Image Export-56.tif	0	TRUE	836.489
LRB444	d1	r1	../d1_r1_triple/LRB444_d1_r1/Snap-430-Image Export-56.tif	1	TRUE	808.228
LRB444	d1	r1	../d1_r1_triple/LRB444_d1_r1/Snap-413-Image Export-39.tif	1	TRUE	836.711
LRB444	d1	r1	../d1_r1_triple/LRB444_d1_r1/Snap-413-Image Export-39.tif	5	TRUE	807.285
LRB444	d1	r1	../d1_r1_triple/LRB444_d1_r1/Snap-413-Image Export-39.tif	6	TRUE	725.353
LRB444	d1	r1	../d1_r1_triple/LRB444_d1_r1/Snap-413-Image Export-39.tif	8	TRUE	767.725
LRB444	d1	r1	../d1_r1_triple/LRB444_d1_r1/Snap-413-Image Export-39.tif	9	TRUE	773.624
LRB444	d1	r1	../d1_r1_triple/LRB444_d1_r1/Snap-413-Image Export-39.tif	14	TRUE	751.782
LRB444	d1	r1	../d1_r1_triple/LRB444_d1_r1/Snap-431-Image Export-57.tif	2	TRUE	883.059
LRB444	d1	r1	../d1_r1_triple/LRB444_d1_r1/Snap-431-Image Export-57.tif	3	TRUE	813
LRB444	d1	r1	../d1_r1_triple/LRB444_d1_r1/Snap-412-Image Export-38.tif	2	TRUE	752.725
LRB444	d1	r1	../d1_r1_triple/LRB444_d1_r1/Snap-412-Image Export-38.tif	3	TRUE	750.488
LRB444	d1	r1	../d1_r1_triple/LRB444_d1_r1/Snap-412-Image Export-38.tif	4	TRUE	833.401
LRB444	d1	r1	../d1_r1_triple/LRB444_d1_r1/Snap-428-Image Export-54.tif	1	TRUE	721.154
LRB444	d1	r1	../d1_r1_triple/LRB444_d1_r1/Snap-428-Image Export-54.tif	2	TRUE	749.009
LRB444	d1	r1	../d1_r1_triple/LRB444_d1_r1/Snap-429-Image Export-55.tif	1	TRUE	824.744
LRB444	d1	r1	../d1_r1_triple/LRB444_d1_r1/Snap-429-Image Export-55.tif	3	TRUE	849.527
LRB444	d1	r1	../d1_r1_triple/LRB444_d1_r1/Snap-429-Image Export-55.tif	4	TRUE	853.634
LRB444	d1	r1	../d1_r1_triple/LRB444_d1_r1/Snap-409-Image Export-35.tif	2	TRUE	768.483
LRB444	d1	r1	../d1_r1_triple/LRB444_d1_r1/Snap-409-Image Export-35.tif	3	TRUE	718.251
LRB444	d1	r1	../d1_r1_triple/LRB444_d1_r1/Snap-435-Image Export-61.tif	0	TRUE	734.507
LRB444	d1	r1	../d1_r1_triple/LRB444_d1_r1/Snap-432-Image Export-58.tif	0	TRUE	775.14
LRB444	d1	r1	../d1_r1_triple/LRB444_d1_r1/Snap-432-Image Export-58.tif	1	TRUE	787.903
LRB444	d1	r1	../d1_r1_triple/LRB444_d1_r1/Snap-432-Image Export-58.tif	2	TRUE	826.169
LRB444	d1	r1	../d1_r1_triple/LRB444_d1_r1/Snap-411-Image Export-37.tif	1	TRUE	762.952
LRB444	d1	r1	../d1_r1_triple/LRB444_d1_r1/Snap-411-Image Export-37.tif	2	TRUE	759.957
LRB444	d1	r1	../d1_r1_triple/LRB444_d1_r1/Snap-411-Image Export-37.tif	3	TRUE	849.305
LRB444	d1	r1	../d1_r1_triple/LRB444_d1_r1/Snap-411-Image Export-37.tif	4	TRUE	741.647
LRB444	d1	r1	../d1_r1_triple/LRB444_d1_r1/Snap-411-Image Export-37.tif	6	TRUE	798.981
LRB444	d1	r1	../d1_r1_triple/LRB444_d1_r1/Snap-411-Image Export-37.tif	8	TRUE	745.603
LRB444	d1	r1	../d1_r1_triple/LRB444_d1_r1/Snap-411-Image Export-37.tif	9	TRUE	735.932
LRB444	d1	r1	../d1_r1_triple/LRB444_d1_r1/Snap-411-Image Export-37.tif	10	TRUE	739.058
LRB444	d1	r1	../d1_r1_triple/LRB444_d1_r1/Snap-433-Image Export-59.tif	0	TRUE	813.092
LRB444	d1	r1	../d1_r1_triple/LRB444_d1_r1/Snap-433-Image Export-59.tif	1	TRUE	736.024
LRB444	d1	r1	../d1_r1_triple/LRB444_d1_r1/Snap-433-Image Export-59.tif	3	TRUE	734.101
LRB444	d1	r1	../d1_r1_triple/LRB444_d1_r1/Snap-433-Image Export-59.tif	5	TRUE	760.807
LRB444	d1	r1	../d1_r1_triple/LRB444_d1_r1/Snap-433-Image Export-59.tif	7	TRUE	796.3
LRB444	d1	r1	../d1_r1_triple/LRB444_d1_r1/Snap-434-Image Export-60.tif	0	TRUE	792.822
LRB444	d1	r1	../d1_r1_triple/LRB444_d1_r1/Snap-434-Image Export-60.tif	2	TRUE	864.213
LRB444	d1	r1	../d1_r1_triple/LRB444_d1_r1/Snap-434-Image Export-60.tif	3	TRUE	729.903
LRB444	d1	r1	../d1_r1_triple/LRB444_d1_r1/Snap-434-Image Export-60.tif	4	TRUE	744.551
LRB444	d1	r1	../d1_r1_triple/LRB444_d1_r1/Snap-410-Image Export-36.tif	1	TRUE	756.647
LRB444	d1	r1	../d1_r1_triple/LRB444_d1_r1/Snap-410-Image Export-36.tif	2	TRUE	800.682
LRB444	d1	r1	../d1_r1_triple/LRB444_d1_r1/Snap-410-Image Export-36.tif	3	TRUE	739.15
LRB444	d1	r1	../d1_r1_triple/LRB444_d1_r1/Snap-437-Image Export-63.tif	2	TRUE	784.74
LRB444	d1	r1	../d1_r1_triple/LRB444_d1_r1/Snap-437-Image Export-63.tif	3	TRUE	770.85
LRB444	d1	r1	../d1_r1_triple/LRB444_d1_r1/Snap-437-Image Export-63.tif	4	TRUE	726.425
LRB444	d1	r1	../d1_r1_triple/LRB444_d1_r1/Snap-437-Image Export-63.tif	8	TRUE	728.83
LRB444	d1	r1	../d1_r1_triple/LRB444_d1_r1/Snap-436-Image Export-62.tif	2	TRUE	740.222
LRB444	d1	r1	../d1_r1_triple/LRB444_d1_r1/Snap-436-Image Export-62.tif	3	TRUE	827.334
LRB444	d1	r1	../d1_r1_triple/LRB444_d1_r1/Snap-436-Image Export-62.tif	5	TRUE	839.078
LRB444	d1	r1	../d1_r1_triple/LRB444_d1_r1/Snap-436-Image Export-62.tif	7	TRUE	758.348
LRB444	d1	r1	../d1_r1_triple/LRB444_d1_r1/Snap-436-Image Export-62.tif	8	TRUE	828.498
LRB444	d1	r1	../d1_r1_triple/LRB444_d1_r1/Snap-436-Image Export-62.tif	11	TRUE	752.763
LRB444	d1	r1	../d1_r1_triple/LRB444_d1_r1/Snap-419-Image Export-45.tif	0	TRUE	850.064
LRB444	d1	r1	../d1_r1_triple/LRB444_d1_r1/Snap-419-Image Export-45.tif	1	TRUE	830.459
LRB444	d1	r1	../d1_r1_triple/LRB444_d1_r1/Snap-407-Image Export-33.tif	0	TRUE	718.251
LRB444	d1	r1	../d1_r1_triple/LRB444_d1_r1/Snap-407-Image Export-33.tif	2	TRUE	756.739
LRB444	d1	r1	../d1_r1_triple/LRB444_d1_r1/Snap-407-Image Export-33.tif	3	TRUE	737.005
LRB444	d1	r1	../d1_r1_triple/LRB444_d1_r1/Snap-443-Image Export-69.tif	0	TRUE	734.285
LRB444	d1	r1	../d1_r1_triple/LRB444_d1_r1/Snap-443-Image Export-69.tif	2	TRUE	825.097
LRB444	d1	r1	../d1_r1_triple/LRB444_d1_r1/Snap-443-Image Export-69.tif	3	TRUE	758.348
LRB444	d1	r1	../d1_r1_triple/LRB444_d1_r1/Snap-442-Image Export-68.tif	0	TRUE	791.749
LRB444	d1	r1	../d1_r1_triple/LRB444_d1_r1/Snap-439-Image Export-65.tif	1	TRUE	742.183
LRB444	d1	r1	../d1_r1_triple/LRB444_d1_r1/Snap-439-Image Export-65.tif	2	TRUE	714.681
LRB444	d1	r1	../d1_r1_triple/LRB444_d1_r1/Snap-439-Image Export-65.tif	3	TRUE	673.512
LRB444	d1	r1	../d1_r1_triple/LRB444_d1_r1/Snap-438-Image Export-64.tif	0	TRUE	728.294
LRB444	d1	r1	../d1_r1_triple/LRB444_d1_r1/Snap-415-Image Export-41.tif	3	TRUE	845.237
LRB444	d1	r1	../d1_r1_triple/LRB444_d1_r1/Snap-415-Image Export-41.tif	5	TRUE	766.874
LRB444	d1	r1	../d1_r1_triple/LRB444_d1_r1/Snap-415-Image Export-41.tif	6	TRUE	831.218
LRB444	d1	r1	../d1_r1_triple/LRB444_d1_r1/Snap-415-Image Export-41.tif	7	TRUE	741.517
LRB444	d1	r1	../d1_r1_triple/LRB444_d1_r1/Snap-414-Image Export-40.tif	2	TRUE	801.164
LRB444	d1	r1	../d1_r1_triple/LRB444_d1_r1/Snap-414-Image Export-40.tif	4	TRUE	702.937
LRB444	d1	r1	../d1_r1_triple/LRB444_d1_r1/Snap-414-Image Export-40.tif	6	TRUE	745.087
LRB444	d1	r1	../d1_r1_triple/LRB444_d1_r1/Snap-414-Image Export-40.tif	7	TRUE	744.995
LRB444	d1	r1	../d1_r1_triple/LRB444_d1_r1/Snap-414-Image Export-40.tif	8	TRUE	794.431
LRB444	d1	r1	../d1_r1_triple/LRB444_d1_r1/Snap-414-Image Export-40.tif	9	TRUE	798.759
LRB444	d1	r1	../d1_r1_triple/LRB444_d1_r1/Snap-414-Image Export-40.tif	10	TRUE	752.005
LRB444	d1	r1	../d1_r1_triple/LRB444_d1_r1/Snap-422-Image Export-48.tif	4	TRUE	874.44
LRB444	d1	r1	../d1_r1_triple/LRB444_d1_r1/Snap-422-Image Export-48.tif	5	TRUE	812.556
LRB444	d1	r1	../d1_r1_triple/LRB444_d1_r1/Snap-422-Image Export-48.tif	6	TRUE	857.518
LRB444	d1	r1	../d1_r1_triple/LRB444_d1_r1/Snap-422-Image Export-48.tif	7	TRUE	738.705
LRB444	d1	r1	../d1_r1_triple/LRB444_d1_r1/Snap-422-Image Export-48.tif	8	TRUE	857.832
LRB444	d1	r1	../d1_r1_triple/LRB444_d1_r1/Snap-422-Image Export-48.tif	9	TRUE	830.145
LRB444	d1	r1	../d1_r1_triple/LRB444_d1_r1/Snap-416-Image Export-42.tif	1	TRUE	813.222
LRB444	d1	r1	../d1_r1_triple/LRB444_d1_r1/Snap-416-Image Export-42.tif	3	TRUE	748.343
LRB444	d1	r1	../d1_r1_triple/LRB444_d1_r1/Snap-423-Image Export-49.tif	0	TRUE	807.285
LRB444	d1	r1	../d1_r1_triple/LRB444_d1_r1/Snap-423-Image Export-49.tif	1	TRUE	816.126
LRB444	d1	r1	../d1_r1_triple/LRB444_d1_r1/Snap-423-Image Export-49.tif	3	TRUE	742.628
LRB444	d1	r1	../d1_r1_triple/LRB444_d1_r1/Snap-423-Image Export-49.tif	5	TRUE	840.465
LRB456	d1	r1	../d1_r1_triple/LRB456_d1_r1/Snap-476-Image Export-102.tif	1	TRUE	832.919
LRB456	d1	r1	../d1_r1_triple/LRB456_d1_r1/Snap-476-Image Export-102.tif	2	TRUE	798.445
LRB456	d1	r1	../d1_r1_triple/LRB456_d1_r1/Snap-476-Image Export-102.tif	3	TRUE	796.392
LRB456	d1	r1	../d1_r1_triple/LRB456_d1_r1/Snap-476-Image Export-102.tif	4	TRUE	785.942
LRB456	d1	r1	../d1_r1_triple/LRB456_d1_r1/Snap-476-Image Export-102.tif	5	TRUE	778.082
LRB456	d1	r1	../d1_r1_triple/LRB456_d1_r1/Snap-470-Image Export-96.tif	0	TRUE	814.517
LRB456	d1	r1	../d1_r1_triple/LRB456_d1_r1/Snap-470-Image Export-96.tif	1	TRUE	725.981
LRB456	d1	r1	../d1_r1_triple/LRB456_d1_r1/Snap-485-Image Export-111.tif	0	TRUE	717.4
LRB456	d1	r1	../d1_r1_triple/LRB456_d1_r1/Snap-483-Image Export-109.tif	0	TRUE	741.425
LRB456	d1	r1	../d1_r1_triple/LRB456_d1_r1/Snap-483-Image Export-109.tif	1	TRUE	842.962
LRB456	d1	r1	../d1_r1_triple/LRB456_d1_r1/Snap-483-Image Export-109.tif	2	TRUE	741.295
LRB456	d1	r1	../d1_r1_triple/LRB456_d1_r1/Snap-483-Image Export-109.tif	3	TRUE	771.203
LRB456	d1	r1	../d1_r1_triple/LRB456_d1_r1/Snap-483-Image Export-109.tif	4	TRUE	730.976
LRB456	d1	r1	../d1_r1_triple/LRB456_d1_r1/Snap-479-Image Export-105.tif	2	TRUE	762.416
LRB456	d1	r1	../d1_r1_triple/LRB456_d1_r1/Snap-479-Image Export-105.tif	3	TRUE	720.932
LRB456	d1	r1	../d1_r1_triple/LRB456_d1_r1/Snap-479-Image Export-105.tif	4	TRUE	798.981
LRB456	d1	r1	../d1_r1_triple/LRB456_d1_r1/Snap-479-Image Export-105.tif	5	TRUE	796.522
LRB456	d1	r1	../d1_r1_triple/LRB456_d1_r1/Snap-479-Image Export-105.tif	6	TRUE	889.402
LRB456	d1	r1	../d1_r1_triple/LRB456_d1_r1/Snap-469-Image Export-95.tif	0	TRUE	747.99
LRB456	d1	r1	../d1_r1_triple/LRB456_d1_r1/Snap-469-Image Export-95.tif	1	TRUE	870.87
LRB456	d1	r1	../d1_r1_triple/LRB456_d1_r1/Snap-480-Image Export-106.tif	0	TRUE	671.589
LRB456	d1	r1	../d1_r1_triple/LRB456_d1_r1/Snap-480-Image Export-106.tif	1	TRUE	688.511
LRB456	d1	r1	../d1_r1_triple/LRB456_d1_r1/Snap-480-Image Export-106.tif	2	TRUE	780.763
LRB456	d1	r1	../d1_r1_triple/LRB456_d1_r1/Snap-480-Image Export-106.tif	3	TRUE	738.836
LRB456	d1	r1	../d1_r1_triple/LRB456_d1_r1/Snap-480-Image Export-106.tif	4	TRUE	766.652
LRB456	d1	r1	../d1_r1_triple/LRB456_d1_r1/Snap-480-Image Export-106.tif	8	TRUE	793.044
LRB456	d1	r1	../d1_r1_triple/LRB456_d1_r1/Snap-468-Image Export-94.tif	0	TRUE	730.753
LRB456	d1	r1	../d1_r1_triple/LRB456_d1_r1/Snap-468-Image Export-94.tif	1	TRUE	749.951
LRB456	d1	r1	../d1_r1_triple/LRB456_d1_r1/Snap-468-Image Export-94.tif	2	TRUE	804.696
LRB456	d1	r1	../d1_r1_triple/LRB456_d1_r1/Snap-461-Image Export-87.tif	0	TRUE	775.179
LRB456	d1	r1	../d1_r1_triple/LRB456_d1_r1/Snap-461-Image Export-87.tif	1	TRUE	736.468
LRB456	d1	r1	../d1_r1_triple/LRB456_d1_r1/Snap-461-Image Export-87.tif	2	TRUE	773.532
LRB456	d1	r1	../d1_r1_triple/LRB456_d1_r1/Snap-461-Image Export-87.tif	3	TRUE	710.039
LRB456	d1	r1	../d1_r1_triple/LRB456_d1_r1/Snap-460-Image Export-86.tif	0	TRUE	716.734
LRB456	d1	r1	../d1_r1_triple/LRB456_d1_r1/Snap-460-Image Export-86.tif	1	TRUE	726.019
LRB456	d1	r1	../d1_r1_triple/LRB456_d1_r1/Snap-460-Image Export-86.tif	2	TRUE	763.841
LRB456	d1	r1	../d1_r1_triple/LRB456_d1_r1/Snap-460-Image Export-86.tif	3	TRUE	769.241
LRB456	d1	r1	../d1_r1_triple/LRB456_d1_r1/Snap-460-Image Export-86.tif	4	TRUE	777.768
LRB456	d1	r1	../d1_r1_triple/LRB456_d1_r1/Snap-477-Image Export-103.tif	2	TRUE	825.465
LRB456	d1	r1	../d1_r1_triple/LRB456_d1_r1/Snap-477-Image Export-103.tif	3	TRUE	738.483
LRB456	d1	r1	../d1_r1_triple/LRB456_d1_r1/Snap-477-Image Export-103.tif	4	TRUE	794.783
LRB456	d1	r1	../d1_r1_triple/LRB456_d1_r1/Snap-478-Image Export-104.tif	1	TRUE	714.681
LRB456	d1	r1	../d1_r1_triple/LRB456_d1_r1/Snap-478-Image Export-104.tif	3	TRUE	737.725
LRB456	d1	r1	../d1_r1_triple/LRB456_d1_r1/Snap-478-Image Export-104.tif	4	TRUE	763.841
LRB456	d1	r1	../d1_r1_triple/LRB456_d1_r1/Snap-478-Image Export-104.tif	5	TRUE	761.473
LRB456	d1	r1	../d1_r1_triple/LRB456_d1_r1/Snap-478-Image Export-104.tif	6	TRUE	752.189
LRB456	d1	r1	../d1_r1_triple/LRB456_d1_r1/Snap-478-Image Export-104.tif	8	TRUE	724.058
LRB456	d1	r1	../d1_r1_triple/LRB456_d1_r1/Snap-478-Image Export-104.tif	9	TRUE	727.091
LRB456	d1	r1	../d1_r1_triple/LRB456_d1_r1/Snap-478-Image Export-104.tif	10	TRUE	748.397
LRB456	d1	r1	../d1_r1_triple/LRB456_d1_r1/Snap-481-Image Export-107.tif	2	TRUE	779.469
LRB456	d1	r1	../d1_r1_triple/LRB456_d1_r1/Snap-481-Image Export-107.tif	3	TRUE	767.15
LRB456	d1	r1	../d1_r1_triple/LRB456_d1_r1/Snap-481-Image Export-107.tif	4	TRUE	835.01
LRB456	d1	r1	../d1_r1_triple/LRB456_d1_r1/Snap-481-Image Export-107.tif	5	TRUE	846.44
LRB456	d1	r1	../d1_r1_triple/LRB456_d1_r1/Snap-467-Image Export-93.tif	0	TRUE	741.517
LRB456	d1	r1	../d1_r1_triple/LRB456_d1_r1/Snap-467-Image Export-93.tif	1	TRUE	834.972
LRB456	d1	r1	../d1_r1_triple/LRB456_d1_r1/Snap-482-Image Export-108.tif	1	TRUE	732.898
LRB456	d1	r1	../d1_r1_triple/LRB456_d1_r1/Snap-482-Image Export-108.tif	3	TRUE	767.28
LRB456	d1	r1	../d1_r1_triple/LRB456_d1_r1/Snap-482-Image Export-108.tif	5	TRUE	731.068
LRB456	d1	r1	../d1_r1_triple/LRB456_d1_r1/Snap-482-Image Export-108.tif	7	TRUE	733.435
LRB456	d1	r1	../d1_r1_triple/LRB456_d1_r1/Snap-466-Image Export-92.tif	0	TRUE	788.44
LRB456	d1	r1	../d1_r1_triple/LRB456_d1_r1/Snap-466-Image Export-92.tif	1	TRUE	713.739
LRB456	d1	r1	../d1_r1_triple/LRB456_d1_r1/Snap-466-Image Export-92.tif	3	TRUE	728.072
LRB456	d1	r1	../d1_r1_triple/LRB456_d1_r1/Snap-466-Image Export-92.tif	4	TRUE	813
LRB456	d1	r1	../d1_r1_triple/LRB456_d1_r1/Snap-466-Image Export-92.tif	5	TRUE	751.652
LRB456	d1	r1	../d1_r1_triple/LRB456_d1_r1/Snap-465-Image Export-91.tif	0	TRUE	733.749
LRB456	d1	r1	../d1_r1_triple/LRB456_d1_r1/Snap-465-Image Export-91.tif	1	TRUE	708.966
LRB456	d1	r1	../d1_r1_triple/LRB456_d1_r1/Snap-465-Image Export-91.tif	3	TRUE	743.034
LRB456	d1	r1	../d1_r1_triple/LRB456_d1_r1/Snap-465-Image Export-91.tif	4	TRUE	741.609
LRB456	d1	r1	../d1_r1_triple/LRB456_d1_r1/Snap-465-Image Export-91.tif	5	TRUE	777.416
LRB456	d1	r1	../d1_r1_triple/LRB456_d1_r1/Snap-465-Image Export-91.tif	6	TRUE	794.875
LRB456	d1	r1	../d1_r1_triple/LRB456_d1_r1/Snap-464-Image Export-90.tif	0	TRUE	812.87
LRB456	d1	r1	../d1_r1_triple/LRB456_d1_r1/Snap-464-Image Export-90.tif	2	TRUE	754.372
LRB456	d1	r1	../d1_r1_triple/LRB456_d1_r1/Snap-464-Image Export-90.tif	3	TRUE	771.387
LRB456	d1	r1	../d1_r1_triple/LRB456_d1_r1/Snap-464-Image Export-90.tif	4	TRUE	799.203
LRB456	d1	r1	../d1_r1_triple/LRB456_d1_r1/Snap-464-Image Export-90.tif	5	TRUE	832.068
LRB456	d1	r1	../d1_r1_triple/LRB456_d1_r1/Snap-464-Image Export-90.tif	7	TRUE	819.252
LRB456	d1	r1	../d1_r1_triple/LRB456_d1_r1/Snap-487-Image Export-113.tif	0	TRUE	797.908
LRB456	d1	r1	../d1_r1_triple/LRB456_d1_r1/Snap-487-Image Export-113.tif	1	TRUE	802.237
LRB456	d1	r1	../d1_r1_triple/LRB456_d1_r1/Snap-490-Image Export-116.tif	0	TRUE	758.44
LRB456	d1	r1	../d1_r1_triple/LRB456_d1_r1/Snap-490-Image Export-116.tif	1	TRUE	730.531
LRB456	d1	r1	../d1_r1_triple/LRB456_d1_r1/Snap-453-Image Export-79.tif	2	TRUE	760.623
LRB456	d1	r1	../d1_r1_triple/LRB456_d1_r1/Snap-453-Image Export-79.tif	3	TRUE	774.734
LRB456	d1	r1	../d1_r1_triple/LRB456_d1_r1/Snap-453-Image Export-79.tif	5	TRUE	772.551
LRB456	d1	r1	../d1_r1_triple/LRB456_d1_r1/Snap-452-Image Export-78.tif	0	TRUE	713.608
LRB456	d1	r1	../d1_r1_triple/LRB456_d1_r1/Snap-452-Image Export-78.tif	1	TRUE	791.527
LRB456	d1	r1	../d1_r1_triple/LRB456_d1_r1/Snap-452-Image Export-78.tif	2	TRUE	752.097
LRB456	d1	r1	../d1_r1_triple/LRB456_d1_r1/Snap-452-Image Export-78.tif	3	TRUE	732.676
LRB456	d1	r1	../d1_r1_triple/LRB456_d1_r1/Snap-452-Image Export-78.tif	4	TRUE	804.382
LRB456	d1	r1	../d1_r1_triple/LRB456_d1_r1/Snap-452-Image Export-78.tif	5	TRUE	755
LRB456	d1	r1	../d1_r1_triple/LRB456_d1_r1/Snap-488-Image Export-114.tif	0	TRUE	790.899
LRB456	d1	r1	../d1_r1_triple/LRB456_d1_r1/Snap-463-Image Export-89.tif	0	TRUE	517.414
LRB456	d1	r1	../d1_r1_triple/LRB456_d1_r1/Snap-463-Image Export-89.tif	1	TRUE	837.155
LRB456	d1	r1	../d1_r1_triple/LRB456_d1_r1/Snap-463-Image Export-89.tif	3	TRUE	732.454
LRB456	d1	r1	../d1_r1_triple/LRB456_d1_r1/Snap-463-Image Export-89.tif	4	TRUE	736.154
LRB456	d1	r1	../d1_r1_triple/LRB456_d1_r1/Snap-474-Image Export-100.tif	5	TRUE	838.005
LRB456	d1	r1	../d1_r1_triple/LRB456_d1_r1/Snap-474-Image Export-100.tif	8	TRUE	845.643
LRB456	d1	r1	../d1_r1_triple/LRB456_d1_r1/Snap-474-Image Export-100.tif	9	TRUE	686.144
LRB456	d1	r1	../d1_r1_triple/LRB456_d1_r1/Snap-474-Image Export-100.tif	10	TRUE	846.938
LRB456	d1	r1	../d1_r1_triple/LRB456_d1_r1/Snap-474-Image Export-100.tif	11	TRUE	744.865
LRB456	d1	r1	../d1_r1_triple/LRB456_d1_r1/Snap-457-Image Export-83.tif	3	TRUE	736.338
LRB456	d1	r1	../d1_r1_triple/LRB456_d1_r1/Snap-457-Image Export-83.tif	4	TRUE	780.671
LRB456	d1	r1	../d1_r1_triple/LRB456_d1_r1/Snap-457-Image Export-83.tif	5	TRUE	758.754
LRB456	d1	r1	../d1_r1_triple/LRB456_d1_r1/Snap-457-Image Export-83.tif	7	TRUE	742.275
LRB456	d1	r1	../d1_r1_triple/LRB456_d1_r1/Snap-457-Image Export-83.tif	9	TRUE	756.295
LRB456	d1	r1	../d1_r1_triple/LRB456_d1_r1/Snap-454-Image Export-80.tif	2	TRUE	759.42
LRB456	d1	r1	../d1_r1_triple/LRB456_d1_r1/Snap-454-Image Export-80.tif	3	TRUE	765.541
LRB456	d1	r1	../d1_r1_triple/LRB456_d1_r1/Snap-454-Image Export-80.tif	5	TRUE	735.082
LRB456	d1	r1	../d1_r1_triple/LRB456_d1_r1/Snap-454-Image Export-80.tif	6	TRUE	769.019
LRB456	d1	r1	../d1_r1_triple/LRB456_d1_r1/Snap-454-Image Export-80.tif	7	TRUE	832.198
LRB456	d1	r1	../d1_r1_triple/LRB456_d1_r1/Snap-455-Image Export-81.tif	0	TRUE	790.807
LRB456	d1	r1	../d1_r1_triple/LRB456_d1_r1/Snap-455-Image Export-81.tif	1	TRUE	799.87
LRB456	d1	r1	../d1_r1_triple/LRB456_d1_r1/Snap-455-Image Export-81.tif	2	TRUE	804.696
LRB456	d1	r1	../d1_r1_triple/LRB456_d1_r1/Snap-491-Image Export-117.tif	1	TRUE	739.058
LRB456	d1	r1	../d1_r1_triple/LRB456_d1_r1/Snap-491-Image Export-117.tif	2	TRUE	765.58
LRB456	d1	r1	../d1_r1_triple/LRB456_d1_r1/Snap-491-Image Export-117.tif	3	TRUE	760.179
LRB456	d1	r1	../d1_r1_triple/LRB456_d1_r1/Snap-473-Image Export-99.tif	2	TRUE	815.237
LRB456	d1	r1	../d1_r1_triple/LRB456_d1_r1/Snap-473-Image Export-99.tif	3	TRUE	718.121
LRB456	d1	r1	../d1_r1_triple/LRB456_d1_r1/Snap-473-Image Export-99.tif	4	TRUE	745.493
LRB456	d1	r1	../d1_r1_triple/LRB456_d1_r1/Snap-473-Image Export-99.tif	6	TRUE	759.198
LRB456	d1	r1	../d1_r1_triple/LRB456_d1_r1/Snap-473-Image Export-99.tif	7	TRUE	748.879
LRB456	d1	r1	../d1_r1_triple/LRB456_d1_r1/Snap-492-Image Export-118.tif	0	TRUE	751.024
LRB456	d1	r1	../d1_r1_triple/LRB456_d1_r1/Snap-492-Image Export-118.tif	1	TRUE	775.715
LRB456	d1	r1	../d1_r1_triple/LRB456_d1_r1/Snap-492-Image Export-118.tif	2	TRUE	778.044
LRB456	d1	r1	../d1_r1_triple/LRB456_d1_r1/Snap-492-Image Export-118.tif	3	TRUE	844.034
LRB456	d1	r1	../d1_r1_triple/LRB456_d1_r1/Snap-492-Image Export-118.tif	4	TRUE	789.198
LRB456	d1	r1	../d1_r1_triple/LRB456_d1_r1/Snap-492-Image Export-118.tif	5	TRUE	738.169
LRB456	d1	r1	../d1_r1_triple/LRB456_d1_r1/Snap-492-Image Export-118.tif	7	TRUE	787.145
LRB456	d1	r1	../d1_r1_triple/LRB456_d1_r1/Snap-492-Image Export-118.tif	8	TRUE	809.338
LRB456	d1	r1	../d1_r1_triple/LRB456_d1_r1/Snap-472-Image Export-98.tif	2	TRUE	720.526
LRB456	d1	r1	../d1_r1_triple/LRB456_d1_r1/Snap-472-Image Export-98.tif	3	TRUE	673.826
LRB456	d1	r1	../d1_r1_triple/LRB456_d1_r1/Snap-475-Image Export-101.tif	0	TRUE	669.85
LRB456	d1	r1	../d1_r1_triple/LRB456_d1_r1/Snap-475-Image Export-101.tif	2	TRUE	776.381
LRB456	d1	r1	../d1_r1_triple/LRB456_d1_r1/Snap-475-Image Export-101.tif	3	TRUE	610.018
LRB456	d1	r1	../d1_r1_triple/LRB456_d1_r1/Snap-475-Image Export-101.tif	4	TRUE	783.797
LRB456	d1	r1	../d1_r1_triple/LRB456_d1_r1/Snap-475-Image Export-101.tif	5	TRUE	776.657
LRB456	d1	r1	../d1_r1_triple/LRB456_d1_r1/Snap-475-Image Export-101.tif	6	TRUE	824.744
LRB456	d1	r1	../d1_r1_triple/LRB456_d1_r1/Snap-475-Image Export-101.tif	7	TRUE	711.463
LRB456	d1	r1	../d1_r1_triple/LRB456_d1_r1/Snap-475-Image Export-101.tif	8	TRUE	741.961
LRB456	d1	r1	../d1_r1_triple/LRB456_d1_r1/Snap-475-Image Export-101.tif	9	TRUE	784.333
LRB456	d1	r1	../d1_r1_triple/LRB456_d1_r1/Snap-475-Image Export-101.tif	11	TRUE	846.532
LRB456	d1	r1	../d1_r1_triple/LRB456_d1_r1/Snap-458-Image Export-84.tif	0	TRUE	678.154
LRB456	d1	r1	../d1_r1_triple/LRB456_d1_r1/Snap-458-Image Export-84.tif	1	TRUE	756.701
LRB456	d1	r1	../d1_r1_triple/LRB456_d1_r1/Snap-459-Image Export-85.tif	0	TRUE	822.247
LRB456	d1	r1	../d1_r1_triple/LRB456_d1_r1/Snap-459-Image Export-85.tif	1	TRUE	828.536
LRB456	d1	r1	../d1_r1_triple/LRB456_d1_r1/Snap-459-Image Export-85.tif	2	TRUE	759.826
LRB456	d1	r1	../d1_r1_triple/LRB456_d1_r1/Snap-489-Image Export-115.tif	0	TRUE	748.787
LRB456	d1	r1	../d1_r1_triple/LRB456_d1_r1/Snap-489-Image Export-115.tif	1	TRUE	771.164
LRB456	d1	r1	../d1_r1_triple/LRB456_d1_r1/Snap-489-Image Export-115.tif	2	TRUE	766.946
N2	d1	r1	../d1_r1_triple/N2_d1_r1/Snap-369-Image Export-142.tif	0	TRUE	837.247
N2	d1	r1	../d1_r1_triple/N2_d1_r1/Snap-369-Image Export-142.tif	3	TRUE	681.149
N2	d1	r1	../d1_r1_triple/N2_d1_r1/Snap-350-Image Export-123.tif	0	TRUE	855.464
N2	d1	r1	../d1_r1_triple/N2_d1_r1/Snap-350-Image Export-123.tif	1	TRUE	859.348
N2	d1	r1	../d1_r1_triple/N2_d1_r1/Snap-350-Image Export-123.tif	2	TRUE	831.088
N2	d1	r1	../d1_r1_triple/N2_d1_r1/Snap-374-Image Export-147.tif	0	TRUE	825.855
N2	d1	r1	../d1_r1_triple/N2_d1_r1/Snap-374-Image Export-147.tif	1	TRUE	772.995
N2	d1	r1	../d1_r1_triple/N2_d1_r1/Snap-374-Image Export-147.tif	2	TRUE	775.899
N2	d1	r1	../d1_r1_triple/N2_d1_r1/Snap-374-Image Export-147.tif	7	TRUE	841.575
N2	d1	r1	../d1_r1_triple/N2_d1_r1/Snap-347-Image Export-120.tif	0	TRUE	769.019
N2	d1	r1	../d1_r1_triple/N2_d1_r1/Snap-347-Image Export-120.tif	1	TRUE	805.454
N2	d1	r1	../d1_r1_triple/N2_d1_r1/Snap-347-Image Export-120.tif	2	TRUE	761.159
N2	d1	r1	../d1_r1_triple/N2_d1_r1/Snap-347-Image Export-120.tif	3	TRUE	847.03
N2	d1	r1	../d1_r1_triple/N2_d1_r1/Snap-356-Image Export-129.tif	0	TRUE	850.508
N2	d1	r1	../d1_r1_triple/N2_d1_r1/Snap-356-Image Export-129.tif	1	TRUE	786.923
N2	d1	r1	../d1_r1_triple/N2_d1_r1/Snap-356-Image Export-129.tif	2	TRUE	808.986
N2	d1	r1	../d1_r1_triple/N2_d1_r1/Snap-346-Image Export-119.tif	0	TRUE	835.102
N2	d1	r1	../d1_r1_triple/N2_d1_r1/Snap-346-Image Export-119.tif	1	TRUE	835.01
N2	d1	r1	../d1_r1_triple/N2_d1_r1/Snap-346-Image Export-119.tif	2	TRUE	866.044
N2	d1	r1	../d1_r1_triple/N2_d1_r1/Snap-346-Image Export-119.tif	5	TRUE	848.455
N2	d1	r1	../d1_r1_triple/N2_d1_r1/Snap-346-Image Export-119.tif	8	TRUE	841.261
N2	d1	r1	../d1_r1_triple/N2_d1_r1/Snap-367-Image Export-140.tif	0	TRUE	839.078
N2	d1	r1	../d1_r1_triple/N2_d1_r1/Snap-365-Image Export-138.tif	0	TRUE	799.203
N2	d1	r1	../d1_r1_triple/N2_d1_r1/Snap-354-Image Export-127.tif	0	TRUE	819.474
N2	d1	r1	../d1_r1_triple/N2_d1_r1/Snap-370-Image Export-143.tif	1	TRUE	876.716
N2	d1	r1	../d1_r1_triple/N2_d1_r1/Snap-370-Image Export-143.tif	3	TRUE	805.454
N2	d1	r1	../d1_r1_triple/N2_d1_r1/Snap-370-Image Export-143.tif	4	TRUE	862.344
N2	d1	r1	../d1_r1_triple/N2_d1_r1/Snap-351-Image Export-124.tif	0	TRUE	798.223
N2	d1	r1	../d1_r1_triple/N2_d1_r1/Snap-351-Image Export-124.tif	1	TRUE	866.358
N2	d1	r1	../d1_r1_triple/N2_d1_r1/Snap-351-Image Export-124.tif	2	TRUE	841.131
N2	d1	r1	../d1_r1_triple/N2_d1_r1/Snap-349-Image Export-122.tif	0	TRUE	747.362
N2	d1	r1	../d1_r1_triple/N2_d1_r1/Snap-357-Image Export-130.tif	1	TRUE	825.725
N2	d1	r1	../d1_r1_triple/N2_d1_r1/Snap-357-Image Export-130.tif	2	TRUE	828.222
N2	d1	r1	../d1_r1_triple/N2_d1_r1/Snap-357-Image Export-130.tif	3	TRUE	821.083
N2	d1	r1	../d1_r1_triple/N2_d1_r1/Snap-357-Image Export-130.tif	4	TRUE	776.879
N2	d1	r1	../d1_r1_triple/N2_d1_r1/Snap-352-Image Export-125.tif	1	TRUE	713.386
N2	d1	r1	../d1_r1_triple/N2_d1_r1/Snap-352-Image Export-125.tif	2	TRUE	859.126
N2	d1	r1	../d1_r1_triple/N2_d1_r1/Snap-352-Image Export-125.tif	3	TRUE	749.377
N2	d1	r1	../d1_r1_triple/N2_d1_r1/Snap-352-Image Export-125.tif	4	TRUE	720.488
N2	d1	r1	../d1_r1_triple/N2_d1_r1/Snap-352-Image Export-125.tif	5	TRUE	842.61
N2	d1	r1	../d1_r1_triple/N2_d1_r1/Snap-352-Image Export-125.tif	6	TRUE	806.305
N2	d1	r1	../d1_r1_triple/N2_d1_r1/Snap-360-Image Export-133.tif	0	TRUE	828
N2	d1	r1	../d1_r1_triple/N2_d1_r1/Snap-360-Image Export-133.tif	1	TRUE	815.46
N2	d1	r1	../d1_r1_triple/N2_d1_r1/Snap-360-Image Export-133.tif	3	TRUE	855.242
N2	d1	r1	../d1_r1_triple/N2_d1_r1/Snap-358-Image Export-131.tif	0	TRUE	837.599
N2	d1	r1	../d1_r1_triple/N2_d1_r1/Snap-358-Image Export-131.tif	1	TRUE	847.734
N2	d1	r1	../d1_r1_triple/N2_d1_r1/Snap-358-Image Export-131.tif	2	TRUE	870.778
N2	d1	r1	../d1_r1_triple/N2_d1_r1/Snap-358-Image Export-131.tif	4	TRUE	837.469
N2	d1	r1	../d1_r1_triple/N2_d1_r1/Snap-358-Image Export-131.tif	5	TRUE	831.532
N2	d1	r1	../d1_r1_triple/N2_d1_r1/Snap-358-Image Export-131.tif	6	TRUE	857.426
N2	d1	r1	../d1_r1_triple/N2_d1_r1/Snap-366-Image Export-139.tif	0	TRUE	866.764
N2	d1	r1	../d1_r1_triple/N2_d1_r1/Snap-366-Image Export-139.tif	1	TRUE	796.522
N2	d1	r1	../d1_r1_triple/N2_d1_r1/Snap-366-Image Export-139.tif	2	TRUE	670.57
N2	d1	r1	../d1_r1_triple/N2_d1_r1/Snap-353-Image Export-126.tif	0	TRUE	752.855
N2	d1	r1	../d1_r1_triple/N2_d1_r1/Snap-353-Image Export-126.tif	2	TRUE	798.575
N2	d1	r1	../d1_r1_triple/N2_d1_r1/Snap-353-Image Export-126.tif	3	TRUE	802.957
N2	d1	r1	../d1_r1_triple/N2_d1_r1/Snap-353-Image Export-126.tif	4	TRUE	870.112
N2	d1	r1	../d1_r1_triple/N2_d1_r1/Snap-353-Image Export-126.tif	5	TRUE	830.996
N2	d1	r1	../d1_r1_triple/N2_d1_r1/Snap-353-Image Export-126.tif	6	TRUE	735.174
N2	d1	r1	../d1_r1_triple/N2_d1_r1/Snap-359-Image Export-132.tif	1	TRUE	744.903
N2	d1	r1	../d1_r1_triple/N2_d1_r1/Snap-359-Image Export-132.tif	2	TRUE	813
N2	d1	r1	../d1_r1_triple/N2_d1_r1/Snap-359-Image Export-132.tif	3	TRUE	847.696
N2	d1	r1	../d1_r1_triple/N2_d1_r1/Snap-359-Image Export-132.tif	4	TRUE	720.84
N2	d1	r1	../d1_r1_triple/N2_d1_r1/Snap-359-Image Export-132.tif	5	TRUE	734.415
N2	d1	r1	../d1_r1_triple/N2_d1_r1/Snap-359-Image Export-132.tif	6	TRUE	864.527
N2	d1	r1	../d1_r1_triple/N2_d1_r1/Snap-359-Image Export-132.tif	7	TRUE	867.339
N2	d1	r1	../d1_r1_triple/N2_d1_r1/Snap-359-Image Export-132.tif	8	TRUE	825.595
N2	d1	r1	../d1_r1_triple/N2_d1_r1/Snap-359-Image Export-132.tif	9	TRUE	791.083
N2	d1	r1	../d1_r1_triple/N2_d1_r1/Snap-355-Image Export-128.tif	0	TRUE	855.687
N2	d1	r1	../d1_r1_triple/N2_d1_r1/Snap-364-Image Export-137.tif	0	TRUE	725.483
N2	d1	r1	../d1_r1_triple/N2_d1_r1/Snap-361-Image Export-134.tif	0	TRUE	779.025
N2	d1	r1	../d1_r1_triple/N2_d1_r1/Snap-361-Image Export-134.tif	1	TRUE	733.121
N2	d1	r1	../d1_r1_triple/N2_d1_r1/Snap-361-Image Export-134.tif	2	TRUE	825.817
N2	d1	r1	../d1_r1_triple/N2_d1_r1/Snap-372-Image Export-145.tif	0	TRUE	845.773
N2	d1	r1	../d1_r1_triple/N2_d1_r1/Snap-372-Image Export-145.tif	1	TRUE	890.605
N2	d1	r1	../d1_r1_triple/N2_d1_r1/Snap-372-Image Export-145.tif	2	TRUE	881.542
N2	d1	r1	../d1_r1_triple/N2_d1_r1/Snap-372-Image Export-145.tif	4	TRUE	823.005
CF1038	d4	r1	../d4_r1_triple/CF1038_d4_r1/Snap-695-Image Export-30.tif	0	TRUE	511.699
CF1038	d4	r1	../d4_r1_triple/CF1038_d4_r1/Snap-695-Image Export-30.tif	1	TRUE	463.298
CF1038	d4	r1	../d4_r1_triple/CF1038_d4_r1/Snap-695-Image Export-30.tif	2	TRUE	396.901
CF1038	d4	r1	../d4_r1_triple/CF1038_d4_r1/Snap-695-Image Export-30.tif	3	TRUE	351.848
CF1038	d4	r1	../d4_r1_triple/CF1038_d4_r1/Snap-695-Image Export-30.tif	4	TRUE	431.505
CF1038	d4	r1	../d4_r1_triple/CF1038_d4_r1/Snap-695-Image Export-30.tif	5	TRUE	454.993
CF1038	d4	r1	../d4_r1_triple/CF1038_d4_r1/Snap-688-Image Export-23.tif	2	TRUE	436.018
CF1038	d4	r1	../d4_r1_triple/CF1038_d4_r1/Snap-688-Image Export-23.tif	3	TRUE	401.636
CF1038	d4	r1	../d4_r1_triple/CF1038_d4_r1/Snap-688-Image Export-23.tif	7	TRUE	365.867
CF1038	d4	r1	../d4_r1_triple/CF1038_d4_r1/Snap-688-Image Export-23.tif	8	TRUE	382.882
CF1038	d4	r1	../d4_r1_triple/CF1038_d4_r1/Snap-688-Image Export-23.tif	10	TRUE	384.084
CF1038	d4	r1	../d4_r1_triple/CF1038_d4_r1/Snap-688-Image Export-23.tif	12	TRUE	205.885
CF1038	d4	r1	../d4_r1_triple/CF1038_d4_r1/Snap-688-Image Export-23.tif	14	TRUE	492.723
CF1038	d4	r1	../d4_r1_triple/CF1038_d4_r1/Snap-689-Image Export-24.tif	0	TRUE	397.66
CF1038	d4	r1	../d4_r1_triple/CF1038_d4_r1/Snap-689-Image Export-24.tif	1	TRUE	407.795
CF1038	d4	r1	../d4_r1_triple/CF1038_d4_r1/Snap-689-Image Export-24.tif	3	TRUE	522.371
CF1038	d4	r1	../d4_r1_triple/CF1038_d4_r1/Snap-689-Image Export-24.tif	4	TRUE	465.443
CF1038	d4	r1	../d4_r1_triple/CF1038_d4_r1/Snap-689-Image Export-24.tif	5	TRUE	494.018
CF1038	d4	r1	../d4_r1_triple/CF1038_d4_r1/Snap-690-Image Export-25.tif	1	TRUE	498.124
CF1038	d4	r1	../d4_r1_triple/CF1038_d4_r1/Snap-690-Image Export-25.tif	2	TRUE	420.075
CF1038	d4	r1	../d4_r1_triple/CF1038_d4_r1/Snap-690-Image Export-25.tif	4	TRUE	411.771
CF1038	d4	r1	../d4_r1_triple/CF1038_d4_r1/Snap-690-Image Export-25.tif	5	TRUE	279.736
CF1038	d4	r1	../d4_r1_triple/CF1038_d4_r1/Snap-690-Image Export-25.tif	6	TRUE	431.413
CF1038	d4	r1	../d4_r1_triple/CF1038_d4_r1/Snap-690-Image Export-25.tif	7	TRUE	461.689
CF1038	d4	r1	../d4_r1_triple/CF1038_d4_r1/Snap-691-Image Export-26.tif	2	TRUE	498.974
CF1038	d4	r1	../d4_r1_triple/CF1038_d4_r1/Snap-691-Image Export-26.tif	3	TRUE	428.38
CF1038	d4	r1	../d4_r1_triple/CF1038_d4_r1/Snap-691-Image Export-26.tif	4	TRUE	299.026
CF1038	d4	r1	../d4_r1_triple/CF1038_d4_r1/Snap-691-Image Export-26.tif	5	TRUE	517.636
CF1038	d4	r1	../d4_r1_triple/CF1038_d4_r1/Snap-673-Image Export-08.tif	0	TRUE	429.008
CF1038	d4	r1	../d4_r1_triple/CF1038_d4_r1/Snap-673-Image Export-08.tif	1	TRUE	516.119
CF1038	d4	r1	../d4_r1_triple/CF1038_d4_r1/Snap-673-Image Export-08.tif	2	TRUE	467.404
CF1038	d4	r1	../d4_r1_triple/CF1038_d4_r1/Snap-673-Image Export-08.tif	3	TRUE	316.707
CF1038	d4	r1	../d4_r1_triple/CF1038_d4_r1/Snap-673-Image Export-08.tif	4	TRUE	335.461
CF1038	d4	r1	../d4_r1_triple/CF1038_d4_r1/Snap-687-Image Export-22.tif	0	TRUE	456.824
CF1038	d4	r1	../d4_r1_triple/CF1038_d4_r1/Snap-687-Image Export-22.tif	1	TRUE	435.481
CF1038	d4	r1	../d4_r1_triple/CF1038_d4_r1/Snap-687-Image Export-22.tif	6	TRUE	382.568
CF1038	d4	r1	../d4_r1_triple/CF1038_d4_r1/Snap-687-Image Export-22.tif	7	TRUE	410.162
CF1038	d4	r1	../d4_r1_triple/CF1038_d4_r1/Snap-687-Image Export-22.tif	12	TRUE	430.433
CF1038	d4	r1	../d4_r1_triple/CF1038_d4_r1/Snap-674-Image Export-09.tif	0	TRUE	383.418
CF1038	d4	r1	../d4_r1_triple/CF1038_d4_r1/Snap-674-Image Export-09.tif	1	TRUE	398.732
CF1038	d4	r1	../d4_r1_triple/CF1038_d4_r1/Snap-674-Image Export-09.tif	5	TRUE	390.742
CF1038	d4	r1	../d4_r1_triple/CF1038_d4_r1/Snap-674-Image Export-09.tif	8	TRUE	391.945
CF1038	d4	r1	../d4_r1_triple/CF1038_d4_r1/Snap-674-Image Export-09.tif	9	TRUE	303.224
CF1038	d4	r1	../d4_r1_triple/CF1038_d4_r1/Snap-674-Image Export-09.tif	11	TRUE	345.911
CF1038	d4	r1	../d4_r1_triple/CF1038_d4_r1/Snap-668-Image Export-03.tif	2	TRUE	467.848
CF1038	d4	r1	../d4_r1_triple/CF1038_d4_r1/Snap-668-Image Export-03.tif	4	TRUE	462.003
CF1038	d4	r1	../d4_r1_triple/CF1038_d4_r1/Snap-668-Image Export-03.tif	5	TRUE	383.862
CF1038	d4	r1	../d4_r1_triple/CF1038_d4_r1/Snap-668-Image Export-03.tif	6	TRUE	385.471
CF1038	d4	r1	../d4_r1_triple/CF1038_d4_r1/Snap-675-Image Export-10.tif	1	TRUE	323.809
CF1038	d4	r1	../d4_r1_triple/CF1038_d4_r1/Snap-675-Image Export-10.tif	5	TRUE	365.737
CF1038	d4	r1	../d4_r1_triple/CF1038_d4_r1/Snap-675-Image Export-10.tif	8	TRUE	425.77
CF1038	d4	r1	../d4_r1_triple/CF1038_d4_r1/Snap-675-Image Export-10.tif	11	TRUE	392.481
CF1038	d4	r1	../d4_r1_triple/CF1038_d4_r1/Snap-675-Image Export-10.tif	14	TRUE	455.66
CF1038	d4	r1	../d4_r1_triple/CF1038_d4_r1/Snap-681-Image Export-16.tif	0	TRUE	482.496
CF1038	d4	r1	../d4_r1_triple/CF1038_d4_r1/Snap-681-Image Export-16.tif	1	TRUE	546.931
CF1038	d4	r1	../d4_r1_triple/CF1038_d4_r1/Snap-681-Image Export-16.tif	2	TRUE	474.858
CF1038	d4	r1	../d4_r1_triple/CF1038_d4_r1/Snap-681-Image Export-16.tif	4	TRUE	386.988
CF1038	d4	r1	../d4_r1_triple/CF1038_d4_r1/Snap-679-Image Export-14.tif	1	TRUE	378.147
CF1038	d4	r1	../d4_r1_triple/CF1038_d4_r1/Snap-679-Image Export-14.tif	2	TRUE	284.693
CF1038	d4	r1	../d4_r1_triple/CF1038_d4_r1/Snap-679-Image Export-14.tif	4	TRUE	430.525
CF1038	d4	r1	../d4_r1_triple/CF1038_d4_r1/Snap-679-Image Export-14.tif	7	TRUE	555.68
CF1038	d4	r1	../d4_r1_triple/CF1038_d4_r1/Snap-679-Image Export-14.tif	10	TRUE	472.361
CF1038	d4	r1	../d4_r1_triple/CF1038_d4_r1/Snap-679-Image Export-14.tif	11	TRUE	360.244
CF1038	d4	r1	../d4_r1_triple/CF1038_d4_r1/Snap-666-Image Export-01.tif	9	TRUE	270.895
LRB444	d4	r1	../d4_r1_triple/LRB444_d4_r1/Snap-706-Image Export-41.tif	0	TRUE	620.82
LRB444	d4	r1	../d4_r1_triple/LRB444_d4_r1/Snap-706-Image Export-41.tif	1	TRUE	571.844
LRB444	d4	r1	../d4_r1_triple/LRB444_d4_r1/Snap-706-Image Export-41.tif	2	TRUE	655.386
LRB444	d4	r1	../d4_r1_triple/LRB444_d4_r1/Snap-697-Image Export-32.tif	0	TRUE	550.187
LRB444	d4	r1	../d4_r1_triple/LRB444_d4_r1/Snap-736-Image Export-71.tif	0	TRUE	718.121
LRB444	d4	r1	../d4_r1_triple/LRB444_d4_r1/Snap-736-Image Export-71.tif	1	TRUE	590.192
LRB444	d4	r1	../d4_r1_triple/LRB444_d4_r1/Snap-736-Image Export-71.tif	2	TRUE	626.627
LRB444	d4	r1	../d4_r1_triple/LRB444_d4_r1/Snap-736-Image Export-71.tif	3	TRUE	691.637
LRB444	d4	r1	../d4_r1_triple/LRB444_d4_r1/Snap-736-Image Export-71.tif	4	TRUE	702.178
LRB444	d4	r1	../d4_r1_triple/LRB444_d4_r1/Snap-718-Image Export-53.tif	0	TRUE	453.921
LRB444	d4	r1	../d4_r1_triple/LRB444_d4_r1/Snap-718-Image Export-53.tif	1	TRUE	693.56
LRB444	d4	r1	../d4_r1_triple/LRB444_d4_r1/Snap-696-Image Export-31.tif	0	TRUE	711.555
LRB444	d4	r1	../d4_r1_triple/LRB444_d4_r1/Snap-696-Image Export-31.tif	2	TRUE	697.352
LRB444	d4	r1	../d4_r1_triple/LRB444_d4_r1/Snap-696-Image Export-31.tif	3	TRUE	739.946
LRB444	d4	r1	../d4_r1_triple/LRB444_d4_r1/Snap-696-Image Export-31.tif	4	TRUE	675.12
LRB444	d4	r1	../d4_r1_triple/LRB444_d4_r1/Snap-696-Image Export-31.tif	5	TRUE	626.719
LRB444	d4	r1	../d4_r1_triple/LRB444_d4_r1/Snap-705-Image Export-40.tif	0	TRUE	679.226
LRB444	d4	r1	../d4_r1_triple/LRB444_d4_r1/Snap-705-Image Export-40.tif	1	TRUE	693.024
LRB444	d4	r1	../d4_r1_triple/LRB444_d4_r1/Snap-728-Image Export-63.tif	0	TRUE	708.966
LRB444	d4	r1	../d4_r1_triple/LRB444_d4_r1/Snap-728-Image Export-63.tif	1	TRUE	547.912
LRB444	d4	r1	../d4_r1_triple/LRB444_d4_r1/Snap-728-Image Export-63.tif	2	TRUE	627.569
LRB444	d4	r1	../d4_r1_triple/LRB444_d4_r1/Snap-728-Image Export-63.tif	3	TRUE	707.043
LRB444	d4	r1	../d4_r1_triple/LRB444_d4_r1/Snap-728-Image Export-63.tif	4	TRUE	707.985
LRB444	d4	r1	../d4_r1_triple/LRB444_d4_r1/Snap-707-Image Export-42.tif	0	TRUE	608.279
LRB444	d4	r1	../d4_r1_triple/LRB444_d4_r1/Snap-707-Image Export-42.tif	1	TRUE	717.492
LRB444	d4	r1	../d4_r1_triple/LRB444_d4_r1/Snap-735-Image Export-70.tif	0	TRUE	686.68
LRB444	d4	r1	../d4_r1_triple/LRB444_d4_r1/Snap-730-Image Export-65.tif	0	TRUE	631.99
LRB444	d4	r1	../d4_r1_triple/LRB444_d4_r1/Snap-730-Image Export-65.tif	1	TRUE	679.319
LRB444	d4	r1	../d4_r1_triple/LRB444_d4_r1/Snap-730-Image Export-65.tif	2	TRUE	598.366
LRB444	d4	r1	../d4_r1_triple/LRB444_d4_r1/Snap-730-Image Export-65.tif	5	TRUE	721.024
LRB444	d4	r1	../d4_r1_triple/LRB444_d4_r1/Snap-730-Image Export-65.tif	6	TRUE	687.087
LRB444	d4	r1	../d4_r1_triple/LRB444_d4_r1/Snap-719-Image Export-54.tif	0	TRUE	632.212
LRB444	d4	r1	../d4_r1_triple/LRB444_d4_r1/Snap-719-Image Export-54.tif	1	TRUE	657.255
LRB444	d4	r1	../d4_r1_triple/LRB444_d4_r1/Snap-719-Image Export-54.tif	2	TRUE	724.28
LRB444	d4	r1	../d4_r1_triple/LRB444_d4_r1/Snap-719-Image Export-54.tif	3	TRUE	634.893
LRB444	d4	r1	../d4_r1_triple/LRB444_d4_r1/Snap-719-Image Export-54.tif	4	TRUE	675.971
LRB444	d4	r1	../d4_r1_triple/LRB444_d4_r1/Snap-729-Image Export-64.tif	0	TRUE	709.724
LRB444	d4	r1	../d4_r1_triple/LRB444_d4_r1/Snap-729-Image Export-64.tif	1	TRUE	712.85
LRB444	d4	r1	../d4_r1_triple/LRB444_d4_r1/Snap-729-Image Export-64.tif	2	TRUE	607.559
LRB444	d4	r1	../d4_r1_triple/LRB444_d4_r1/Snap-729-Image Export-64.tif	3	TRUE	565.685
LRB444	d4	r1	../d4_r1_triple/LRB444_d4_r1/Snap-729-Image Export-64.tif	4	TRUE	725.445
LRB444	d4	r1	../d4_r1_triple/LRB444_d4_r1/Snap-732-Image Export-67.tif	0	TRUE	636.096
LRB444	d4	r1	../d4_r1_triple/LRB444_d4_r1/Snap-732-Image Export-67.tif	1	TRUE	646.806
LRB444	d4	r1	../d4_r1_triple/LRB444_d4_r1/Snap-732-Image Export-67.tif	2	TRUE	677.932
LRB444	d4	r1	../d4_r1_triple/LRB444_d4_r1/Snap-732-Image Export-67.tif	3	TRUE	612.386
LRB444	d4	r1	../d4_r1_triple/LRB444_d4_r1/Snap-699-Image Export-34.tif	0	TRUE	672.845
LRB444	d4	r1	../d4_r1_triple/LRB444_d4_r1/Snap-699-Image Export-34.tif	1	TRUE	706.913
LRB444	d4	r1	../d4_r1_triple/LRB444_d4_r1/Snap-699-Image Export-34.tif	2	TRUE	704.768
LRB444	d4	r1	../d4_r1_triple/LRB444_d4_r1/Snap-711-Image Export-46.tif	0	TRUE	618.859
LRB444	d4	r1	../d4_r1_triple/LRB444_d4_r1/Snap-711-Image Export-46.tif	1	TRUE	617.12
LRB444	d4	r1	../d4_r1_triple/LRB444_d4_r1/Snap-724-Image Export-59.tif	0	TRUE	613.458
LRB444	d4	r1	../d4_r1_triple/LRB444_d4_r1/Snap-724-Image Export-59.tif	1	TRUE	704.009
LRB444	d4	r1	../d4_r1_triple/LRB444_d4_r1/Snap-724-Image Export-59.tif	3	TRUE	642.791
LRB444	d4	r1	../d4_r1_triple/LRB444_d4_r1/Snap-724-Image Export-59.tif	4	TRUE	532.376
LRB444	d4	r1	../d4_r1_triple/LRB444_d4_r1/Snap-709-Image Export-44.tif	0	TRUE	703.251
LRB444	d4	r1	../d4_r1_triple/LRB444_d4_r1/Snap-702-Image Export-37.tif	0	TRUE	620.024
LRB444	d4	r1	../d4_r1_triple/LRB444_d4_r1/Snap-702-Image Export-37.tif	1	TRUE	448.206
LRB444	d4	r1	../d4_r1_triple/LRB444_d4_r1/Snap-702-Image Export-37.tif	3	TRUE	724.502
LRB444	d4	r1	../d4_r1_triple/LRB444_d4_r1/Snap-702-Image Export-37.tif	4	TRUE	620.912
LRB444	d4	r1	../d4_r1_triple/LRB444_d4_r1/Snap-702-Image Export-37.tif	6	TRUE	686.772
LRB444	d4	r1	../d4_r1_triple/LRB444_d4_r1/Snap-726-Image Export-61.tif	0	TRUE	648.414
LRB444	d4	r1	../d4_r1_triple/LRB444_d4_r1/Snap-726-Image Export-61.tif	1	TRUE	728.256
LRB444	d4	r1	../d4_r1_triple/LRB444_d4_r1/Snap-726-Image Export-61.tif	3	TRUE	666.724
LRB444	d4	r1	../d4_r1_triple/LRB444_d4_r1/Snap-698-Image Export-33.tif	0	TRUE	792.416
LRB444	d4	r1	../d4_r1_triple/LRB444_d4_r1/Snap-698-Image Export-33.tif	1	TRUE	649.043
LRB444	d4	r1	../d4_r1_triple/LRB444_d4_r1/Snap-698-Image Export-33.tif	2	TRUE	685.7
LRB444	d4	r1	../d4_r1_triple/LRB444_d4_r1/Snap-698-Image Export-33.tif	3	TRUE	679.226
LRB444	d4	r1	../d4_r1_triple/LRB444_d4_r1/Snap-698-Image Export-33.tif	4	TRUE	732.048
LRB444	d4	r1	../d4_r1_triple/LRB444_d4_r1/Snap-700-Image Export-35.tif	1	TRUE	711.371
LRB444	d4	r1	../d4_r1_triple/LRB444_d4_r1/Snap-700-Image Export-35.tif	2	TRUE	711.979
LRB444	d4	r1	../d4_r1_triple/LRB444_d4_r1/Snap-700-Image Export-35.tif	3	TRUE	640.738
LRB444	d4	r1	../d4_r1_triple/LRB444_d4_r1/Snap-700-Image Export-35.tif	5	TRUE	726.019
LRB444	d4	r1	../d4_r1_triple/LRB444_d4_r1/Snap-716-Image Export-51.tif	0	TRUE	611.757
LRB444	d4	r1	../d4_r1_triple/LRB444_d4_r1/Snap-716-Image Export-51.tif	1	TRUE	664.985
LRB444	d4	r1	../d4_r1_triple/LRB444_d4_r1/Snap-716-Image Export-51.tif	2	TRUE	674.584
LRB444	d4	r1	../d4_r1_triple/LRB444_d4_r1/Snap-716-Image Export-51.tif	3	TRUE	682.758
LRB444	d4	r1	../d4_r1_triple/LRB444_d4_r1/Snap-723-Image Export-58.tif	0	TRUE	693.024
LRB444	d4	r1	../d4_r1_triple/LRB444_d4_r1/Snap-723-Image Export-58.tif	1	TRUE	578.226
LRB444	d4	r1	../d4_r1_triple/LRB444_d4_r1/Snap-723-Image Export-58.tif	2	TRUE	706.062
LRB444	d4	r1	../d4_r1_triple/LRB444_d4_r1/Snap-723-Image Export-58.tif	3	TRUE	569.255
LRB444	d4	r1	../d4_r1_triple/LRB444_d4_r1/Snap-717-Image Export-52.tif	1	TRUE	623.279
LRB444	d4	r1	../d4_r1_triple/LRB444_d4_r1/Snap-717-Image Export-52.tif	2	TRUE	706.729
LRB444	d4	r1	../d4_r1_triple/LRB444_d4_r1/Snap-717-Image Export-52.tif	3	TRUE	620.376
LRB444	d4	r1	../d4_r1_triple/LRB444_d4_r1/Snap-717-Image Export-52.tif	4	TRUE	566.129
LRB444	d4	r1	../d4_r1_triple/LRB444_d4_r1/Snap-717-Image Export-52.tif	5	TRUE	666.28
LRB444	d4	r1	../d4_r1_triple/LRB444_d4_r1/Snap-725-Image Export-60.tif	1	TRUE	646.009
LRB444	d4	r1	../d4_r1_triple/LRB444_d4_r1/Snap-725-Image Export-60.tif	2	TRUE	701.198
LRB444	d4	r1	../d4_r1_triple/LRB444_d4_r1/Snap-701-Image Export-36.tif	0	TRUE	551.39
LRB444	d4	r1	../d4_r1_triple/LRB444_d4_r1/Snap-701-Image Export-36.tif	1	TRUE	641.053
LRB444	d4	r1	../d4_r1_triple/LRB444_d4_r1/Snap-701-Image Export-36.tif	2	TRUE	452.312
LRB444	d4	r1	../d4_r1_triple/LRB444_d4_r1/Snap-708-Image Export-43.tif	0	TRUE	695.077
LRB444	d4	r1	../d4_r1_triple/LRB444_d4_r1/Snap-715-Image Export-50.tif	0	TRUE	686.236
LRB444	d4	r1	../d4_r1_triple/LRB444_d4_r1/Snap-715-Image Export-50.tif	1	TRUE	588.989
LRB444	d4	r1	../d4_r1_triple/LRB444_d4_r1/Snap-727-Image Export-62.tif	0	TRUE	588.361
LRB444	d4	r1	../d4_r1_triple/LRB444_d4_r1/Snap-727-Image Export-62.tif	2	TRUE	728.7
LRB444	d4	r1	../d4_r1_triple/LRB444_d4_r1/Snap-721-Image Export-56.tif	0	TRUE	720.082
LRB444	d4	r1	../d4_r1_triple/LRB444_d4_r1/Snap-714-Image Export-49.tif	0	TRUE	671.681
LRB444	d4	r1	../d4_r1_triple/LRB444_d4_r1/Snap-714-Image Export-49.tif	1	TRUE	589.748
LRB444	d4	r1	../d4_r1_triple/LRB444_d4_r1/Snap-714-Image Export-49.tif	2	TRUE	754.908
LRB444	d4	r1	../d4_r1_triple/LRB444_d4_r1/Snap-714-Image Export-49.tif	3	TRUE	644.622
LRB444	d4	r1	../d4_r1_triple/LRB444_d4_r1/Snap-703-Image Export-38.tif	1	TRUE	718.029
LRB444	d4	r1	../d4_r1_triple/LRB444_d4_r1/Snap-703-Image Export-38.tif	2	TRUE	718.565
LRB444	d4	r1	../d4_r1_triple/LRB444_d4_r1/Snap-703-Image Export-38.tif	5	TRUE	544.694
LRB444	d4	r1	../d4_r1_triple/LRB444_d4_r1/Snap-720-Image Export-55.tif	0	TRUE	697.98
LRB444	d4	r1	../d4_r1_triple/LRB444_d4_r1/Snap-722-Image Export-57.tif	0	TRUE	612.608
LRB444	d4	r1	../d4_r1_triple/LRB444_d4_r1/Snap-722-Image Export-57.tif	1	TRUE	639.352
LRB444	d4	r1	../d4_r1_triple/LRB444_d4_r1/Snap-704-Image Export-39.tif	0	TRUE	735.044
LRB444	d4	r1	../d4_r1_triple/LRB444_d4_r1/Snap-704-Image Export-39.tif	1	TRUE	595.463
LRB444	d4	r1	../d4_r1_triple/LRB444_d4_r1/Snap-704-Image Export-39.tif	2	TRUE	658.42
LRB444	d4	r1	../d4_r1_triple/LRB444_d4_r1/Snap-713-Image Export-48.tif	0	TRUE	676.951
LRB444	d4	r1	../d4_r1_triple/LRB444_d4_r1/Snap-713-Image Export-48.tif	1	TRUE	660.251
LRB444	d4	r1	../d4_r1_triple/LRB444_d4_r1/Snap-733-Image Export-68.tif	0	TRUE	630.695
LRB444	d4	r1	../d4_r1_triple/LRB444_d4_r1/Snap-733-Image Export-68.tif	1	TRUE	718.787
LRB444	d4	r1	../d4_r1_triple/LRB444_d4_r1/Snap-733-Image Export-68.tif	2	TRUE	693.338
LRB444	d4	r1	../d4_r1_triple/LRB444_d4_r1/Snap-734-Image Export-69.tif	0	TRUE	667.889
LRB456	d4	r1	../d4_r1_triple/LRB456_d4_r1/Snap-764-Image Export-99.tif	0	TRUE	349.795
LRB456	d4	r1	../d4_r1_triple/LRB456_d4_r1/Snap-764-Image Export-99.tif	1	TRUE	415.433
LRB456	d4	r1	../d4_r1_triple/LRB456_d4_r1/Snap-764-Image Export-99.tif	2	TRUE	215.484
LRB456	d4	r1	../d4_r1_triple/LRB456_d4_r1/Snap-764-Image Export-99.tif	3	TRUE	339.659
LRB456	d4	r1	../d4_r1_triple/LRB456_d4_r1/Snap-764-Image Export-99.tif	6	TRUE	327.915
LRB456	d4	r1	../d4_r1_triple/LRB456_d4_r1/Snap-751-Image Export-86.tif	0	TRUE	374.263
LRB456	d4	r1	../d4_r1_triple/LRB456_d4_r1/Snap-751-Image Export-86.tif	1	TRUE	311.306
LRB456	d4	r1	../d4_r1_triple/LRB456_d4_r1/Snap-751-Image Export-86.tif	2	TRUE	373.413
LRB456	d4	r1	../d4_r1_triple/LRB456_d4_r1/Snap-751-Image Export-86.tif	3	TRUE	545.231
LRB456	d4	r1	../d4_r1_triple/LRB456_d4_r1/Snap-751-Image Export-86.tif	4	TRUE	264.958
LRB456	d4	r1	../d4_r1_triple/LRB456_d4_r1/Snap-751-Image Export-86.tif	5	TRUE	218.832
LRB456	d4	r1	../d4_r1_triple/LRB456_d4_r1/Snap-749-Image Export-84.tif	0	TRUE	385.157
LRB456	d4	r1	../d4_r1_triple/LRB456_d4_r1/Snap-749-Image Export-84.tif	3	TRUE	353.234
LRB456	d4	r1	../d4_r1_triple/LRB456_d4_r1/Snap-749-Image Export-84.tif	5	TRUE	364.128
LRB456	d4	r1	../d4_r1_triple/LRB456_d4_r1/Snap-752-Image Export-87.tif	3	TRUE	318.852
LRB456	d4	r1	../d4_r1_triple/LRB456_d4_r1/Snap-752-Image Export-87.tif	4	TRUE	491.689
LRB456	d4	r1	../d4_r1_triple/LRB456_d4_r1/Snap-752-Image Export-87.tif	5	TRUE	413.602
LRB456	d4	r1	../d4_r1_triple/LRB456_d4_r1/Snap-752-Image Export-87.tif	6	TRUE	289.113
LRB456	d4	r1	../d4_r1_triple/LRB456_d4_r1/Snap-752-Image Export-87.tif	7	TRUE	453.07
LRB456	d4	r1	../d4_r1_triple/LRB456_d4_r1/Snap-752-Image Export-87.tif	8	TRUE	332.113
LRB456	d4	r1	../d4_r1_triple/LRB456_d4_r1/Snap-752-Image Export-87.tif	11	TRUE	249.866
LRB456	d4	r1	../d4_r1_triple/LRB456_d4_r1/Snap-737-Image Export-72.tif	5	TRUE	450.481
LRB456	d4	r1	../d4_r1_triple/LRB456_d4_r1/Snap-748-Image Export-83.tif	0	TRUE	274.871
LRB456	d4	r1	../d4_r1_triple/LRB456_d4_r1/Snap-748-Image Export-83.tif	1	TRUE	419.539
LRB456	d4	r1	../d4_r1_triple/LRB456_d4_r1/Snap-748-Image Export-83.tif	2	TRUE	346.577
LRB456	d4	r1	../d4_r1_triple/LRB456_d4_r1/Snap-748-Image Export-83.tif	3	TRUE	331.041
LRB456	d4	r1	../d4_r1_triple/LRB456_d4_r1/Snap-757-Image Export-92.tif	0	TRUE	239.953
LRB456	d4	r1	../d4_r1_triple/LRB456_d4_r1/Snap-746-Image Export-81.tif	0	TRUE	432.892
LRB456	d4	r1	../d4_r1_triple/LRB456_d4_r1/Snap-746-Image Export-81.tif	1	TRUE	266.253
LRB456	d4	r1	../d4_r1_triple/LRB456_d4_r1/Snap-746-Image Export-81.tif	3	TRUE	365.959
LRB456	d4	r1	../d4_r1_triple/LRB456_d4_r1/Snap-746-Image Export-81.tif	4	TRUE	395.514
LRB456	d4	r1	../d4_r1_triple/LRB456_d4_r1/Snap-746-Image Export-81.tif	5	TRUE	375.114
LRB456	d4	r1	../d4_r1_triple/LRB456_d4_r1/Snap-746-Image Export-81.tif	6	TRUE	316.485
LRB456	d4	r1	../d4_r1_triple/LRB456_d4_r1/Snap-746-Image Export-81.tif	8	TRUE	353.364
LRB456	d4	r1	../d4_r1_triple/LRB456_d4_r1/Snap-746-Image Export-81.tif	10	TRUE	343.321
LRB456	d4	r1	../d4_r1_triple/LRB456_d4_r1/Snap-746-Image Export-81.tif	11	TRUE	331.799
LRB456	d4	r1	../d4_r1_triple/LRB456_d4_r1/Snap-746-Image Export-81.tif	14	TRUE	258.707
LRB456	d4	r1	../d4_r1_triple/LRB456_d4_r1/Snap-746-Image Export-81.tif	15	TRUE	237.9
LRB456	d4	r1	../d4_r1_triple/LRB456_d4_r1/Snap-746-Image Export-81.tif	18	TRUE	328.766
LRB456	d4	r1	../d4_r1_triple/LRB456_d4_r1/Snap-746-Image Export-81.tif	19	TRUE	271.432
LRB456	d4	r1	../d4_r1_triple/LRB456_d4_r1/Snap-758-Image Export-93.tif	0	TRUE	280.05
LRB456	d4	r1	../d4_r1_triple/LRB456_d4_r1/Snap-758-Image Export-93.tif	1	TRUE	354.751
LRB456	d4	r1	../d4_r1_triple/LRB456_d4_r1/Snap-758-Image Export-93.tif	2	TRUE	250.089
LRB456	d4	r1	../d4_r1_triple/LRB456_d4_r1/Snap-758-Image Export-93.tif	4	TRUE	283.176
LRB456	d4	r1	../d4_r1_triple/LRB456_d4_r1/Snap-758-Image Export-93.tif	7	TRUE	236.92
LRB456	d4	r1	../d4_r1_triple/LRB456_d4_r1/Snap-758-Image Export-93.tif	8	TRUE	445.747
LRB456	d4	r1	../d4_r1_triple/LRB456_d4_r1/Snap-758-Image Export-93.tif	9	TRUE	326.528
LRB456	d4	r1	../d4_r1_triple/LRB456_d4_r1/Snap-758-Image Export-93.tif	10	TRUE	257.098
LRB456	d4	r1	../d4_r1_triple/LRB456_d4_r1/Snap-758-Image Export-93.tif	11	TRUE	217.315
LRB456	d4	r1	../d4_r1_triple/LRB456_d4_r1/Snap-758-Image Export-93.tif	12	TRUE	229.374
LRB456	d4	r1	../d4_r1_triple/LRB456_d4_r1/Snap-758-Image Export-93.tif	15	TRUE	202.446
LRB456	d4	r1	../d4_r1_triple/LRB456_d4_r1/Snap-744-Image Export-79.tif	0	TRUE	470.752
LRB456	d4	r1	../d4_r1_triple/LRB456_d4_r1/Snap-744-Image Export-79.tif	2	TRUE	353.679
LRB456	d4	r1	../d4_r1_triple/LRB456_d4_r1/Snap-744-Image Export-79.tif	6	TRUE	327.601
LRB456	d4	r1	../d4_r1_triple/LRB456_d4_r1/Snap-744-Image Export-79.tif	7	TRUE	167.619
LRB456	d4	r1	../d4_r1_triple/LRB456_d4_r1/Snap-744-Image Export-79.tif	9	TRUE	355.732
LRB456	d4	r1	../d4_r1_triple/LRB456_d4_r1/Snap-744-Image Export-79.tif	10	TRUE	277.239
LRB456	d4	r1	../d4_r1_triple/LRB456_d4_r1/Snap-744-Image Export-79.tif	13	TRUE	265.495
LRB456	d4	r1	../d4_r1_triple/LRB456_d4_r1/Snap-759-Image Export-94.tif	0	TRUE	425.032
LRB456	d4	r1	../d4_r1_triple/LRB456_d4_r1/Snap-759-Image Export-94.tif	4	TRUE	425.568
LRB456	d4	r1	../d4_r1_triple/LRB456_d4_r1/Snap-759-Image Export-94.tif	8	TRUE	350.553
LRB456	d4	r1	../d4_r1_triple/LRB456_d4_r1/Snap-759-Image Export-94.tif	9	TRUE	233.166
LRB456	d4	r1	../d4_r1_triple/LRB456_d4_r1/Snap-759-Image Export-94.tif	10	TRUE	343.007
LRB456	d4	r1	../d4_r1_triple/LRB456_d4_r1/Snap-759-Image Export-94.tif	11	TRUE	395.606
LRB456	d4	r1	../d4_r1_triple/LRB456_d4_r1/Snap-759-Image Export-94.tif	13	TRUE	310.77
LRB456	d4	r1	../d4_r1_triple/LRB456_d4_r1/Snap-769-Image Export-104.tif	0	TRUE	351.848
LRB456	d4	r1	../d4_r1_triple/LRB456_d4_r1/Snap-769-Image Export-104.tif	1	TRUE	380.108
LRB456	d4	r1	../d4_r1_triple/LRB456_d4_r1/Snap-769-Image Export-104.tif	2	TRUE	473.211
LRB456	d4	r1	../d4_r1_triple/LRB456_d4_r1/Snap-769-Image Export-104.tif	3	TRUE	207.18
LRB456	d4	r1	../d4_r1_triple/LRB456_d4_r1/Snap-769-Image Export-104.tif	4	TRUE	255.581
LRB456	d4	r1	../d4_r1_triple/LRB456_d4_r1/Snap-769-Image Export-104.tif	6	TRUE	281.123
LRB456	d4	r1	../d4_r1_triple/LRB456_d4_r1/Snap-769-Image Export-104.tif	7	TRUE	341.49
LRB456	d4	r1	../d4_r1_triple/LRB456_d4_r1/Snap-769-Image Export-104.tif	8	TRUE	335.055
LRB456	d4	r1	../d4_r1_triple/LRB456_d4_r1/Snap-741-Image Export-76.tif	0	TRUE	439.143
LRB456	d4	r1	../d4_r1_triple/LRB456_d4_r1/Snap-741-Image Export-76.tif	1	TRUE	378.017
LRB456	d4	r1	../d4_r1_triple/LRB456_d4_r1/Snap-741-Image Export-76.tif	3	TRUE	451.554
LRB456	d4	r1	../d4_r1_triple/LRB456_d4_r1/Snap-761-Image Export-96.tif	0	TRUE	303.446
LRB456	d4	r1	../d4_r1_triple/LRB456_d4_r1/Snap-761-Image Export-96.tif	1	TRUE	377.389
LRB456	d4	r1	../d4_r1_triple/LRB456_d4_r1/Snap-761-Image Export-96.tif	3	TRUE	374.485
LRB456	d4	r1	../d4_r1_triple/LRB456_d4_r1/Snap-761-Image Export-96.tif	4	TRUE	450.481
LRB456	d4	r1	../d4_r1_triple/LRB456_d4_r1/Snap-761-Image Export-96.tif	5	TRUE	260.76
LRB456	d4	r1	../d4_r1_triple/LRB456_d4_r1/Snap-761-Image Export-96.tif	8	TRUE	431.413
LRB456	d4	r1	../d4_r1_triple/LRB456_d4_r1/Snap-761-Image Export-96.tif	11	TRUE	367.254
LRB456	d4	r1	../d4_r1_triple/LRB456_d4_r1/Snap-761-Image Export-96.tif	12	TRUE	361.225
LRB456	d4	r1	../d4_r1_triple/LRB456_d4_r1/Snap-761-Image Export-96.tif	14	TRUE	229.818
LRB456	d4	r1	../d4_r1_triple/LRB456_d4_r1/Snap-761-Image Export-96.tif	15	TRUE	216.557
LRB456	d4	r1	../d4_r1_triple/LRB456_d4_r1/Snap-761-Image Export-96.tif	16	TRUE	381.809
LRB456	d4	r1	../d4_r1_triple/LRB456_d4_r1/Snap-761-Image Export-96.tif	17	TRUE	240.267
LRB456	d4	r1	../d4_r1_triple/LRB456_d4_r1/Snap-761-Image Export-96.tif	19	TRUE	318.316
LRB456	d4	r1	../d4_r1_triple/LRB456_d4_r1/Snap-761-Image Export-96.tif	20	TRUE	412.307
LRB456	d4	r1	../d4_r1_triple/LRB456_d4_r1/Snap-760-Image Export-95.tif	1	TRUE	361.002
LRB456	d4	r1	../d4_r1_triple/LRB456_d4_r1/Snap-760-Image Export-95.tif	6	TRUE	362.075
LRB456	d4	r1	../d4_r1_triple/LRB456_d4_r1/Snap-760-Image Export-95.tif	11	TRUE	429.36
LRB456	d4	r1	../d4_r1_triple/LRB456_d4_r1/Snap-760-Image Export-95.tif	13	TRUE	331.799
LRB456	d4	r1	../d4_r1_triple/LRB456_d4_r1/Snap-760-Image Export-95.tif	14	TRUE	325.104
LRB456	d4	r1	../d4_r1_triple/LRB456_d4_r1/Snap-760-Image Export-95.tif	15	TRUE	328.988
LRB456	d4	r1	../d4_r1_triple/LRB456_d4_r1/Snap-760-Image Export-95.tif	16	TRUE	339.659
LRB456	d4	r1	../d4_r1_triple/LRB456_d4_r1/Snap-767-Image Export-102.tif	0	TRUE	213.117
LRB456	d4	r1	../d4_r1_triple/LRB456_d4_r1/Snap-767-Image Export-102.tif	1	TRUE	363.278
LRB456	d4	r1	../d4_r1_triple/LRB456_d4_r1/Snap-767-Image Export-102.tif	3	TRUE	218.074
LRB456	d4	r1	../d4_r1_triple/LRB456_d4_r1/Snap-767-Image Export-102.tif	4	TRUE	339.123
LRB456	d4	r1	../d4_r1_triple/LRB456_d4_r1/Snap-753-Image Export-88.tif	0	TRUE	334.481
LRB456	d4	r1	../d4_r1_triple/LRB456_d4_r1/Snap-753-Image Export-88.tif	1	TRUE	368.012
LRB456	d4	r1	../d4_r1_triple/LRB456_d4_r1/Snap-753-Image Export-88.tif	3	TRUE	341.176
N2	d4	r1	../d4_r1_triple/N2_d4_r1/Snap-649-Image Export-124.tif	1	TRUE	483.032
N2	d4	r1	../d4_r1_triple/N2_d4_r1/Snap-643-Image Export-118.tif	0	TRUE	656.183
N2	d4	r1	../d4_r1_triple/N2_d4_r1/Snap-643-Image Export-118.tif	1	TRUE	646.545
N2	d4	r1	../d4_r1_triple/N2_d4_r1/Snap-643-Image Export-118.tif	2	TRUE	678.468
N2	d4	r1	../d4_r1_triple/N2_d4_r1/Snap-643-Image Export-118.tif	3	TRUE	562.153
N2	d4	r1	../d4_r1_triple/N2_d4_r1/Snap-643-Image Export-118.tif	4	TRUE	698.517
N2	d4	r1	../d4_r1_triple/N2_d4_r1/Snap-643-Image Export-118.tif	5	TRUE	661.415
N2	d4	r1	../d4_r1_triple/N2_d4_r1/Snap-640-Image Export-115.tif	0	TRUE	711.777
N2	d4	r1	../d4_r1_triple/N2_d4_r1/Snap-640-Image Export-115.tif	1	TRUE	536.168
N2	d4	r1	../d4_r1_triple/N2_d4_r1/Snap-640-Image Export-115.tif	2	TRUE	670.608
N2	d4	r1	../d4_r1_triple/N2_d4_r1/Snap-640-Image Export-115.tif	3	TRUE	668.111
N2	d4	r1	../d4_r1_triple/N2_d4_r1/Snap-639-Image Export-114.tif	0	TRUE	602.787
N2	d4	r1	../d4_r1_triple/N2_d4_r1/Snap-639-Image Export-114.tif	1	TRUE	568.941
N2	d4	r1	../d4_r1_triple/N2_d4_r1/Snap-639-Image Export-114.tif	2	TRUE	679.763
N2	d4	r1	../d4_r1_triple/N2_d4_r1/Snap-639-Image Export-114.tif	3	TRUE	688.289
N2	d4	r1	../d4_r1_triple/N2_d4_r1/Snap-646-Image Export-121.tif	0	TRUE	617.878
N2	d4	r1	../d4_r1_triple/N2_d4_r1/Snap-646-Image Export-121.tif	1	TRUE	580.501
N2	d4	r1	../d4_r1_triple/N2_d4_r1/Snap-651-Image Export-126.tif	0	TRUE	599.791
N2	d4	r1	../d4_r1_triple/N2_d4_r1/Snap-651-Image Export-126.tif	1	TRUE	628.014
N2	d4	r1	../d4_r1_triple/N2_d4_r1/Snap-636-Image Export-111.tif	0	TRUE	588.545
N2	d4	r1	../d4_r1_triple/N2_d4_r1/Snap-636-Image Export-111.tif	1	TRUE	633.729
N2	d4	r1	../d4_r1_triple/N2_d4_r1/Snap-636-Image Export-111.tif	2	TRUE	673.067
N2	d4	r1	../d4_r1_triple/N2_d4_r1/Snap-636-Image Export-111.tif	3	TRUE	619.932
N2	d4	r1	../d4_r1_triple/N2_d4_r1/Snap-636-Image Export-111.tif	4	TRUE	666.058
N2	d4	r1	../d4_r1_triple/N2_d4_r1/Snap-636-Image Export-111.tif	5	TRUE	603.009
N2	d4	r1	../d4_r1_triple/N2_d4_r1/Snap-636-Image Export-111.tif	6	TRUE	735.526
N2	d4	r1	../d4_r1_triple/N2_d4_r1/Snap-636-Image Export-111.tif	7	TRUE	482.052
N2	d4	r1	../d4_r1_triple/N2_d4_r1/Snap-636-Image Export-111.tif	8	TRUE	601.492
N2	d4	r1	../d4_r1_triple/N2_d4_r1/Snap-636-Image Export-111.tif	9	TRUE	650.337
N2	d4	r1	../d4_r1_triple/N2_d4_r1/Snap-636-Image Export-111.tif	11	TRUE	691.507
N2	d4	r1	../d4_r1_triple/N2_d4_r1/Snap-662-Image Export-137.tif	4	TRUE	554.385
N2	d4	r1	../d4_r1_triple/N2_d4_r1/Snap-662-Image Export-137.tif	6	TRUE	556.438
N2	d4	r1	../d4_r1_triple/N2_d4_r1/Snap-662-Image Export-137.tif	7	TRUE	664.449
N2	d4	r1	../d4_r1_triple/N2_d4_r1/Snap-662-Image Export-137.tif	8	TRUE	624.352
N2	d4	r1	../d4_r1_triple/N2_d4_r1/Snap-662-Image Export-137.tif	10	TRUE	610.777
N2	d4	r1	../d4_r1_triple/N2_d4_r1/Snap-662-Image Export-137.tif	11	TRUE	646.361
N2	d4	r1	../d4_r1_triple/N2_d4_r1/Snap-662-Image Export-137.tif	12	TRUE	654.221
N2	d4	r1	../d4_r1_triple/N2_d4_r1/Snap-641-Image Export-116.tif	0	TRUE	670.034
N2	d4	r1	../d4_r1_triple/N2_d4_r1/Snap-641-Image Export-116.tif	1	TRUE	611.979
N2	d4	r1	../d4_r1_triple/N2_d4_r1/Snap-641-Image Export-116.tif	2	TRUE	674.806
N2	d4	r1	../d4_r1_triple/N2_d4_r1/Snap-641-Image Export-116.tif	3	TRUE	654.313
N2	d4	r1	../d4_r1_triple/N2_d4_r1/Snap-664-Image Export-139.tif	1	TRUE	610.555
N2	d4	r1	../d4_r1_triple/N2_d4_r1/Snap-664-Image Export-139.tif	2	TRUE	666.502
N2	d4	r1	../d4_r1_triple/N2_d4_r1/Snap-664-Image Export-139.tif	3	TRUE	646.453
N2	d4	r1	../d4_r1_triple/N2_d4_r1/Snap-664-Image Export-139.tif	5	TRUE	625.999
N2	d4	r1	../d4_r1_triple/N2_d4_r1/Snap-664-Image Export-139.tif	6	TRUE	662.618
N2	d4	r1	../d4_r1_triple/N2_d4_r1/Snap-664-Image Export-139.tif	7	TRUE	579.927
N2	d4	r1	../d4_r1_triple/N2_d4_r1/Snap-664-Image Export-139.tif	8	TRUE	703.825
N2	d4	r1	../d4_r1_triple/N2_d4_r1/Snap-664-Image Export-139.tif	9	TRUE	662.748
N2	d4	r1	../d4_r1_triple/N2_d4_r1/Snap-664-Image Export-139.tif	10	TRUE	630.381
N2	d4	r1	../d4_r1_triple/N2_d4_r1/Snap-638-Image Export-113.tif	0	TRUE	625.332
N2	d4	r1	../d4_r1_triple/N2_d4_r1/Snap-638-Image Export-113.tif	1	TRUE	741.203
N2	d4	r1	../d4_r1_triple/N2_d4_r1/Snap-638-Image Export-113.tif	2	TRUE	440.346
N2	d4	r1	../d4_r1_triple/N2_d4_r1/Snap-638-Image Export-113.tif	3	TRUE	605.506
N2	d4	r1	../d4_r1_triple/N2_d4_r1/Snap-638-Image Export-113.tif	4	TRUE	702.178
N2	d4	r1	../d4_r1_triple/N2_d4_r1/Snap-634-Image Export-109.tif	1	TRUE	677.488
N2	d4	r1	../d4_r1_triple/N2_d4_r1/Snap-634-Image Export-109.tif	2	TRUE	644.937
N2	d4	r1	../d4_r1_triple/N2_d4_r1/Snap-634-Image Export-109.tif	3	TRUE	682
N2	d4	r1	../d4_r1_triple/N2_d4_r1/Snap-647-Image Export-122.tif	0	TRUE	603.101
N2	d4	r1	../d4_r1_triple/N2_d4_r1/Snap-647-Image Export-122.tif	1	TRUE	731.734
N2	d4	r1	../d4_r1_triple/N2_d4_r1/Snap-650-Image Export-125.tif	0	TRUE	673.734
N2	d4	r1	../d4_r1_triple/N2_d4_r1/Snap-650-Image Export-125.tif	1	TRUE	679.226
N2	d4	r1	../d4_r1_triple/N2_d4_r1/Snap-637-Image Export-112.tif	0	TRUE	597.202
N2	d4	r1	../d4_r1_triple/N2_d4_r1/Snap-637-Image Export-112.tif	2	TRUE	708.116
N2	d4	r1	../d4_r1_triple/N2_d4_r1/Snap-637-Image Export-112.tif	3	TRUE	583.182
N2	d4	r1	../d4_r1_triple/N2_d4_r1/Snap-637-Image Export-112.tif	4	TRUE	645.695
N2	d4	r1	../d4_r1_triple/N2_d4_r1/Snap-637-Image Export-112.tif	7	TRUE	625.961
N2	d4	r1	../d4_r1_triple/N2_d4_r1/Snap-637-Image Export-112.tif	8	TRUE	667.666
N2	d4	r1	../d4_r1_triple/N2_d4_r1/Snap-637-Image Export-112.tif	9	TRUE	664.893
N2	d4	r1	../d4_r1_triple/N2_d4_r1/Snap-653-Image Export-128.tif	2	TRUE	615.289
N2	d4	r1	../d4_r1_triple/N2_d4_r1/Snap-653-Image Export-128.tif	3	TRUE	599.883
N2	d4	r1	../d4_r1_triple/N2_d4_r1/Snap-653-Image Export-128.tif	4	TRUE	689.27
N2	d4	r1	../d4_r1_triple/N2_d4_r1/Snap-653-Image Export-128.tif	5	TRUE	642.791
N2	d4	r1	../d4_r1_triple/N2_d4_r1/Snap-655-Image Export-130.tif	1	TRUE	629.086
N2	d4	r1	../d4_r1_triple/N2_d4_r1/Snap-655-Image Export-130.tif	2	TRUE	596.98
N2	d4	r1	../d4_r1_triple/N2_d4_r1/Snap-655-Image Export-130.tif	3	TRUE	629.492
N2	d4	r1	../d4_r1_triple/N2_d4_r1/Snap-655-Image Export-130.tif	4	TRUE	664.449
N2	d4	r1	../d4_r1_triple/N2_d4_r1/Snap-655-Image Export-130.tif	5	TRUE	638.501
N2	d4	r1	../d4_r1_triple/N2_d4_r1/Snap-648-Image Export-123.tif	0	TRUE	665.299
N2	d4	r1	../d4_r1_triple/N2_d4_r1/Snap-656-Image Export-131.tif	0	TRUE	685.792
N2	d4	r1	../d4_r1_triple/N2_d4_r1/Snap-656-Image Export-131.tif	1	TRUE	656.052
N2	d4	r1	../d4_r1_triple/N2_d4_r1/Snap-656-Image Export-131.tif	2	TRUE	659.936
N2	d4	r1	../d4_r1_triple/N2_d4_r1/Snap-656-Image Export-131.tif	3	TRUE	675.028
N2	d4	r1	../d4_r1_triple/N2_d4_r1/Snap-665-Image Export-140.tif	0	TRUE	712
N2	d4	r1	../d4_r1_triple/N2_d4_r1/Snap-665-Image Export-140.tif	3	TRUE	498.032
N2	d4	r1	../d4_r1_triple/N2_d4_r1/Snap-665-Image Export-140.tif	4	TRUE	574.12
N2	d4	r1	../d4_r1_triple/N2_d4_r1/Snap-665-Image Export-140.tif	5	TRUE	629.086
N2	d4	r1	../d4_r1_triple/N2_d4_r1/Snap-665-Image Export-140.tif	6	TRUE	656.367
N2	d4	r1	../d4_r1_triple/N2_d4_r1/Snap-642-Image Export-117.tif	0	TRUE	646.231
N2	d4	r1	../d4_r1_triple/N2_d4_r1/Snap-642-Image Export-117.tif	1	TRUE	658.956
N2	d4	r1	../d4_r1_triple/N2_d4_r1/Snap-659-Image Export-134.tif	1	TRUE	654.091
N2	d4	r1	../d4_r1_triple/N2_d4_r1/Snap-659-Image Export-134.tif	2	TRUE	629.937
N2	d4	r1	../d4_r1_triple/N2_d4_r1/Snap-659-Image Export-134.tif	3	TRUE	558.806
N2	d4	r1	../d4_r1_triple/N2_d4_r1/Snap-659-Image Export-134.tif	4	TRUE	596.351
N2	d4	r1	../d4_r1_triple/N2_d4_r1/Snap-659-Image Export-134.tif	5	TRUE	656.589
N2	d4	r1	../d4_r1_triple/N2_d4_r1/Snap-659-Image Export-134.tif	6	TRUE	625.202
N2	d4	r1	../d4_r1_triple/N2_d4_r1/Snap-659-Image Export-134.tif	7	TRUE	747.806
N2	d4	r1	../d4_r1_triple/N2_d4_r1/Snap-659-Image Export-134.tif	8	TRUE	712.406
N2	d4	r1	../d4_r1_triple/N2_d4_r1/Snap-659-Image Export-134.tif	9	TRUE	592.651
N2	d4	r1	../d4_r1_triple/N2_d4_r1/Snap-659-Image Export-134.tif	10	TRUE	623.501
N2	d4	r1	../d4_r1_triple/N2_d4_r1/Snap-661-Image Export-136.tif	1	TRUE	581.443
N2	d4	r1	../d4_r1_triple/N2_d4_r1/Snap-661-Image Export-136.tif	4	TRUE	668.647
N2	d4	r1	../d4_r1_triple/N2_d4_r1/Snap-661-Image Export-136.tif	9	TRUE	715.327
N2	d4	r1	../d4_r1_triple/N2_d4_r1/Snap-661-Image Export-136.tif	10	TRUE	641.719
N2	d4	r1	../d4_r1_triple/N2_d4_r1/Snap-661-Image Export-136.tif	11	TRUE	632.786
N2	d4	r1	../d4_r1_triple/N2_d4_r1/Snap-661-Image Export-136.tif	12	TRUE	627.385
N2	d4	r1	../d4_r1_triple/N2_d4_r1/Snap-661-Image Export-136.tif	13	TRUE	612.255
N2	d4	r1	../d4_r1_triple/N2_d4_r1/Snap-661-Image Export-136.tif	14	TRUE	707.671
N2	d4	r1	../d4_r1_triple/N2_d4_r1/Snap-661-Image Export-136.tif	15	TRUE	480.665
N2	d4	r1	../d4_r1_triple/N2_d4_r1/Snap-644-Image Export-119.tif	0	TRUE	597.294
N2	d4	r1	../d4_r1_triple/N2_d4_r1/Snap-644-Image Export-119.tif	1	TRUE	631.269
N2	d4	r1	../d4_r1_triple/N2_d4_r1/Snap-644-Image Export-119.tif	2	TRUE	609.482
N2	d4	r1	../d4_r1_triple/N2_d4_r1/Snap-644-Image Export-119.tif	3	TRUE	664.449
N2	d4	r1	../d4_r1_triple/N2_d4_r1/Snap-633-Image Export-108.tif	0	TRUE	581.129
N2	d4	r1	../d4_r1_triple/N2_d4_r1/Snap-633-Image Export-108.tif	1	TRUE	736.783
N2	d4	r1	../d4_r1_triple/N2_d4_r1/Snap-633-Image Export-108.tif	2	TRUE	698.425
N2	d4	r1	../d4_r1_triple/N2_d4_r1/Snap-633-Image Export-108.tif	4	TRUE	572.955
N2	d4	r1	../d4_r1_triple/N2_d4_r1/Snap-633-Image Export-108.tif	5	TRUE	603.675
N2	d4	r1	../d4_r1_triple/N2_d4_r1/Snap-635-Image Export-110.tif	0	TRUE	638.999
N2	d4	r1	../d4_r1_triple/N2_d4_r1/Snap-635-Image Export-110.tif	1	TRUE	667.705
N2	d4	r1	../d4_r1_triple/N2_d4_r1/Snap-635-Image Export-110.tif	2	TRUE	642.569
N2	d4	r1	../d4_r1_triple/N2_d4_r1/Snap-635-Image Export-110.tif	3	TRUE	562.376
N2	d4	r1	../d4_r1_triple/N2_d4_r1/Snap-652-Image Export-127.tif	0	TRUE	584.347
N2	d4	r1	../d4_r1_triple/N2_d4_r1/Snap-652-Image Export-127.tif	1	TRUE	664.449
N2	d4	r1	../d4_r1_triple/N2_d4_r1/Snap-652-Image Export-127.tif	2	TRUE	683.111
N2	d4	r1	../d4_r1_triple/N2_d4_r1/Snap-657-Image Export-132.tif	0	TRUE	683.739
N2	d4	r1	../d4_r1_triple/N2_d4_r1/Snap-657-Image Export-132.tif	2	TRUE	627.033
N2	d4	r1	../d4_r1_triple/N2_d4_r1/Snap-657-Image Export-132.tif	3	TRUE	702.27
N2	d4	r1	../d4_r1_triple/N2_d4_r1/Snap-658-Image Export-133.tif	0	TRUE	680.077
N2	d4	r1	../d4_r1_triple/N2_d4_r1/Snap-658-Image Export-133.tif	1	TRUE	621.004
N2	d4	r1	../d4_r1_triple/N2_d4_r1/Snap-658-Image Export-133.tif	2	TRUE	590.192
N2	d4	r1	../d4_r1_triple/N2_d4_r1/Snap-658-Image Export-133.tif	3	TRUE	654.758
N2	d4	r1	../d4_r1_triple/N2_d4_r1/Snap-658-Image Export-133.tif	4	TRUE	681.057
N2	d4	r1	../d4_r1_triple/N2_d4_r1/Snap-658-Image Export-133.tif	6	TRUE	722.265
N2	d4	r1	../d4_r1_triple/N2_d4_r1/Snap-645-Image Export-120.tif	0	TRUE	604.526
N2	d4	r1	../d4_r1_triple/N2_d4_r1/Snap-645-Image Export-120.tif	1	TRUE	705.656
N2	d4	r1	../d4_r1_triple/N2_d4_r1/Snap-645-Image Export-120.tif	2	TRUE	608.502
N2	d4	r1	../d4_r1_triple/N2_d4_r1/Snap-645-Image Export-120.tif	3	TRUE	692.579
N2	d4	r1	../d4_r1_triple/N2_d4_r1/Snap-654-Image Export-129.tif	0	TRUE	603.545
N2	d4	r1	../d4_r1_triple/N2_d4_r1/Snap-654-Image Export-129.tif	1	TRUE	672.531
N2	d4	r1	../d4_r1_triple/N2_d4_r1/Snap-654-Image Export-129.tif	2	TRUE	634.801
N2	d4	r1	../d4_r1_triple/N2_d4_r1/Snap-654-Image Export-129.tif	3	TRUE	648.8
N2	d4	r1	../d4_r1_triple/N2_d4_r1/Snap-654-Image Export-129.tif	4	TRUE	641.405
N2	d4	r1	../d4_r1_triple/N2_d4_r1/Snap-660-Image Export-135.tif	6	TRUE	719.86
N2	d4	r1	../d4_r1_triple/N2_d4_r1/Snap-660-Image Export-135.tif	10	TRUE	633.729
N2	d4	r1	../d4_r1_triple/N2_d4_r1/Snap-660-Image Export-135.tif	11	TRUE	659.714
N2	d4	r1	../d4_r1_triple/N2_d4_r1/Snap-660-Image Export-135.tif	12	TRUE	658.956
N2	d4	r1	../d4_r1_triple/N2_d4_r1/Snap-660-Image Export-135.tif	13	TRUE	636.096
N2	d4	r1	../d4_r1_triple/N2_d4_r1/Snap-663-Image Export-138.tif	0	TRUE	617.878
N2	d4	r1	../d4_r1_triple/N2_d4_r1/Snap-663-Image Export-138.tif	1	TRUE	660.565
N2	d4	r1	../d4_r1_triple/N2_d4_r1/Snap-663-Image Export-138.tif	2	TRUE	579.52
N2	d4	r1	../d4_r1_triple/N2_d4_r1/Snap-663-Image Export-138.tif	3	TRUE	680.207
N2	d4	r1	../d4_r1_triple/N2_d4_r1/Snap-663-Image Export-138.tif	5	TRUE	707.893
N2	d4	r1	../d4_r1_triple/N2_d4_r1/Snap-663-Image Export-138.tif	7	TRUE	571.936
N2	d4	r1	../d4_r1_triple/N2_d4_r1/Snap-663-Image Export-138.tif	8	TRUE	635.782
N2	d4	r1	../d4_r1_triple/N2_d4_r1/Snap-663-Image Export-138.tif	10	TRUE	618.729
N2	d4	r1	../d4_r1_triple/N2_d4_r1/Snap-663-Image Export-138.tif	11	TRUE	661.637
N2	d4	r1	../d4_r1_triple/N2_d4_r1/Snap-663-Image Export-138.tif	12	TRUE	651.004
N2	d4	r1	../d4_r1_triple/N2_d4_r1/Snap-663-Image Export-138.tif	13	TRUE	625.608
N2	d4	r1	../d4_r1_triple/N2_d4_r1/Snap-663-Image Export-138.tif	14	TRUE	598.588
CF1038	d1	r2	../d1_r2_triple/CF1038_d1_r2/Snap-840-Image Export-16.tif	0	TRUE	772.237
CF1038	d1	r2	../d1_r2_triple/CF1038_d1_r2/Snap-840-Image Export-16.tif	1	TRUE	726.555
CF1038	d1	r2	../d1_r2_triple/CF1038_d1_r2/Snap-840-Image Export-16.tif	2	TRUE	740.889
CF1038	d1	r2	../d1_r2_triple/CF1038_d1_r2/Snap-852-Image Export-28.tif	0	TRUE	808.672
CF1038	d1	r2	../d1_r2_triple/CF1038_d1_r2/Snap-852-Image Export-28.tif	2	TRUE	718.565
CF1038	d1	r2	../d1_r2_triple/CF1038_d1_r2/Snap-852-Image Export-28.tif	3	TRUE	743.126
CF1038	d1	r2	../d1_r2_triple/CF1038_d1_r2/Snap-853-Image Export-29.tif	1	TRUE	687.217
CF1038	d1	r2	../d1_r2_triple/CF1038_d1_r2/Snap-853-Image Export-29.tif	2	TRUE	748.879
CF1038	d1	r2	../d1_r2_triple/CF1038_d1_r2/Snap-853-Image Export-29.tif	3	TRUE	734.285
CF1038	d1	r2	../d1_r2_triple/CF1038_d1_r2/Snap-853-Image Export-29.tif	4	TRUE	699.053
CF1038	d1	r2	../d1_r2_triple/CF1038_d1_r2/Snap-833-Image Export-09.tif	0	TRUE	703.825
CF1038	d1	r2	../d1_r2_triple/CF1038_d1_r2/Snap-833-Image Export-09.tif	1	TRUE	791.657
CF1038	d1	r2	../d1_r2_triple/CF1038_d1_r2/Snap-833-Image Export-09.tif	2	TRUE	699.053
CF1038	d1	r2	../d1_r2_triple/CF1038_d1_r2/Snap-833-Image Export-09.tif	3	TRUE	729.459
CF1038	d1	r2	../d1_r2_triple/CF1038_d1_r2/Snap-861-Image Export-37.tif	0	TRUE	720.618
CF1038	d1	r2	../d1_r2_triple/CF1038_d1_r2/Snap-861-Image Export-37.tif	2	TRUE	681.816
CF1038	d1	r2	../d1_r2_triple/CF1038_d1_r2/Snap-861-Image Export-37.tif	3	TRUE	736.468
CF1038	d1	r2	../d1_r2_triple/CF1038_d1_r2/Snap-832-Image Export-08.tif	0	TRUE	721.024
CF1038	d1	r2	../d1_r2_triple/CF1038_d1_r2/Snap-832-Image Export-08.tif	1	TRUE	733.305
CF1038	d1	r2	../d1_r2_triple/CF1038_d1_r2/Snap-832-Image Export-08.tif	2	TRUE	819.658
CF1038	d1	r2	../d1_r2_triple/CF1038_d1_r2/Snap-860-Image Export-36.tif	0	TRUE	767.503
CF1038	d1	r2	../d1_r2_triple/CF1038_d1_r2/Snap-854-Image Export-30.tif	0	TRUE	762.454
CF1038	d1	r2	../d1_r2_triple/CF1038_d1_r2/Snap-854-Image Export-30.tif	1	TRUE	702.493
CF1038	d1	r2	../d1_r2_triple/CF1038_d1_r2/Snap-854-Image Export-30.tif	2	TRUE	838.097
CF1038	d1	r2	../d1_r2_triple/CF1038_d1_r2/Snap-854-Image Export-30.tif	3	TRUE	780.227
CF1038	d1	r2	../d1_r2_triple/CF1038_d1_r2/Snap-854-Image Export-30.tif	4	TRUE	757.753
CF1038	d1	r2	../d1_r2_triple/CF1038_d1_r2/Snap-854-Image Export-30.tif	5	TRUE	788.087
CF1038	d1	r2	../d1_r2_triple/CF1038_d1_r2/Snap-854-Image Export-30.tif	6	TRUE	725.353
CF1038	d1	r2	../d1_r2_triple/CF1038_d1_r2/Snap-854-Image Export-30.tif	7	TRUE	742.812
CF1038	d1	r2	../d1_r2_triple/CF1038_d1_r2/Snap-855-Image Export-31.tif	0	TRUE	802.329
CF1038	d1	r2	../d1_r2_triple/CF1038_d1_r2/Snap-855-Image Export-31.tif	3	TRUE	787.551
CF1038	d1	r2	../d1_r2_triple/CF1038_d1_r2/Snap-855-Image Export-31.tif	6	TRUE	763.396
CF1038	d1	r2	../d1_r2_triple/CF1038_d1_r2/Snap-855-Image Export-31.tif	7	TRUE	782.594
CF1038	d1	r2	../d1_r2_triple/CF1038_d1_r2/Snap-855-Image Export-31.tif	8	TRUE	715.439
CF1038	d1	r2	../d1_r2_triple/CF1038_d1_r2/Snap-831-Image Export-07.tif	0	TRUE	746.604
CF1038	d1	r2	../d1_r2_triple/CF1038_d1_r2/Snap-863-Image Export-39.tif	0	TRUE	729.329
CF1038	d1	r2	../d1_r2_triple/CF1038_d1_r2/Snap-863-Image Export-39.tif	1	TRUE	758.662
CF1038	d1	r2	../d1_r2_triple/CF1038_d1_r2/Snap-863-Image Export-39.tif	2	TRUE	743.256
CF1038	d1	r2	../d1_r2_triple/CF1038_d1_r2/Snap-863-Image Export-39.tif	3	TRUE	798.445
CF1038	d1	r2	../d1_r2_triple/CF1038_d1_r2/Snap-863-Image Export-39.tif	4	TRUE	791.971
CF1038	d1	r2	../d1_r2_triple/CF1038_d1_r2/Snap-856-Image Export-32.tif	0	TRUE	769.241
CF1038	d1	r2	../d1_r2_triple/CF1038_d1_r2/Snap-856-Image Export-32.tif	2	TRUE	774.198
CF1038	d1	r2	../d1_r2_triple/CF1038_d1_r2/Snap-856-Image Export-32.tif	3	TRUE	761.159
CF1038	d1	r2	../d1_r2_triple/CF1038_d1_r2/Snap-856-Image Export-32.tif	4	TRUE	743.478
CF1038	d1	r2	../d1_r2_triple/CF1038_d1_r2/Snap-856-Image Export-32.tif	6	TRUE	726.333
CF1038	d1	r2	../d1_r2_triple/CF1038_d1_r2/Snap-856-Image Export-32.tif	7	TRUE	717.232
CF1038	d1	r2	../d1_r2_triple/CF1038_d1_r2/Snap-856-Image Export-32.tif	8	TRUE	775.807
CF1038	d1	r2	../d1_r2_triple/CF1038_d1_r2/Snap-830-Image Export-06.tif	0	TRUE	734.193
CF1038	d1	r2	../d1_r2_triple/CF1038_d1_r2/Snap-830-Image Export-06.tif	1	TRUE	741.869
CF1038	d1	r2	../d1_r2_triple/CF1038_d1_r2/Snap-830-Image Export-06.tif	2	TRUE	742.275
CF1038	d1	r2	../d1_r2_triple/CF1038_d1_r2/Snap-857-Image Export-33.tif	0	TRUE	728.256
CF1038	d1	r2	../d1_r2_triple/CF1038_d1_r2/Snap-857-Image Export-33.tif	2	TRUE	707.985
CF1038	d1	r2	../d1_r2_triple/CF1038_d1_r2/Snap-857-Image Export-33.tif	3	TRUE	749.821
CF1038	d1	r2	../d1_r2_triple/CF1038_d1_r2/Snap-857-Image Export-33.tif	4	TRUE	736.154
CF1038	d1	r2	../d1_r2_triple/CF1038_d1_r2/Snap-857-Image Export-33.tif	5	TRUE	740.575
CF1038	d1	r2	../d1_r2_triple/CF1038_d1_r2/Snap-857-Image Export-33.tif	6	TRUE	712.092
CF1038	d1	r2	../d1_r2_triple/CF1038_d1_r2/Snap-862-Image Export-38.tif	1	TRUE	739.28
CF1038	d1	r2	../d1_r2_triple/CF1038_d1_r2/Snap-862-Image Export-38.tif	3	TRUE	727.091
CF1038	d1	r2	../d1_r2_triple/CF1038_d1_r2/Snap-862-Image Export-38.tif	5	TRUE	729.367
CF1038	d1	r2	../d1_r2_triple/CF1038_d1_r2/Snap-829-Image Export-05.tif	0	TRUE	728.608
CF1038	d1	r2	../d1_r2_triple/CF1038_d1_r2/Snap-829-Image Export-05.tif	1	TRUE	759.512
CF1038	d1	r2	../d1_r2_triple/CF1038_d1_r2/Snap-829-Image Export-05.tif	2	TRUE	696.057
CF1038	d1	r2	../d1_r2_triple/CF1038_d1_r2/Snap-848-Image Export-24.tif	0	TRUE	738.613
CF1038	d1	r2	../d1_r2_triple/CF1038_d1_r2/Snap-848-Image Export-24.tif	1	TRUE	740.444
CF1038	d1	r2	../d1_r2_triple/CF1038_d1_r2/Snap-848-Image Export-24.tif	2	TRUE	772.015
CF1038	d1	r2	../d1_r2_triple/CF1038_d1_r2/Snap-848-Image Export-24.tif	3	TRUE	729.459
CF1038	d1	r2	../d1_r2_triple/CF1038_d1_r2/Snap-849-Image Export-25.tif	0	TRUE	729.773
CF1038	d1	r2	../d1_r2_triple/CF1038_d1_r2/Snap-850-Image Export-26.tif	1	TRUE	744.735
CF1038	d1	r2	../d1_r2_triple/CF1038_d1_r2/Snap-850-Image Export-26.tif	2	TRUE	712.092
CF1038	d1	r2	../d1_r2_triple/CF1038_d1_r2/Snap-850-Image Export-26.tif	3	TRUE	739.28
CF1038	d1	r2	../d1_r2_triple/CF1038_d1_r2/Snap-837-Image Export-13.tif	0	TRUE	748.879
CF1038	d1	r2	../d1_r2_triple/CF1038_d1_r2/Snap-837-Image Export-13.tif	1	TRUE	701.642
CF1038	d1	r2	../d1_r2_triple/CF1038_d1_r2/Snap-837-Image Export-13.tif	2	TRUE	705.082
CF1038	d1	r2	../d1_r2_triple/CF1038_d1_r2/Snap-837-Image Export-13.tif	3	TRUE	745.179
CF1038	d1	r2	../d1_r2_triple/CF1038_d1_r2/Snap-851-Image Export-27.tif	2	TRUE	762.232
CF1038	d1	r2	../d1_r2_triple/CF1038_d1_r2/Snap-851-Image Export-27.tif	3	TRUE	776.787
CF1038	d1	r2	../d1_r2_triple/CF1038_d1_r2/Snap-851-Image Export-27.tif	5	TRUE	732.362
CF1038	d1	r2	../d1_r2_triple/CF1038_d1_r2/Snap-851-Image Export-27.tif	6	TRUE	708.338
CF1038	d1	r2	../d1_r2_triple/CF1038_d1_r2/Snap-851-Image Export-27.tif	7	TRUE	775.271
CF1038	d1	r2	../d1_r2_triple/CF1038_d1_r2/Snap-836-Image Export-12.tif	0	TRUE	752.189
CF1038	d1	r2	../d1_r2_triple/CF1038_d1_r2/Snap-836-Image Export-12.tif	1	TRUE	720.082
CF1038	d1	r2	../d1_r2_triple/CF1038_d1_r2/Snap-836-Image Export-12.tif	2	TRUE	731.068
CF1038	d1	r2	../d1_r2_triple/CF1038_d1_r2/Snap-835-Image Export-11.tif	0	TRUE	768.039
CF1038	d1	r2	../d1_r2_triple/CF1038_d1_r2/Snap-835-Image Export-11.tif	1	TRUE	787.459
CF1038	d1	r2	../d1_r2_triple/CF1038_d1_r2/Snap-835-Image Export-11.tif	2	TRUE	707.043
CF1038	d1	r2	../d1_r2_triple/CF1038_d1_r2/Snap-834-Image Export-10.tif	0	TRUE	766.116
CF1038	d1	r2	../d1_r2_triple/CF1038_d1_r2/Snap-834-Image Export-10.tif	1	TRUE	599.125
CF1038	d1	r2	../d1_r2_triple/CF1038_d1_r2/Snap-834-Image Export-10.tif	2	TRUE	721.376
CF1038	d1	r2	../d1_r2_triple/CF1038_d1_r2/Snap-858-Image Export-34.tif	0	TRUE	752.097
CF1038	d1	r2	../d1_r2_triple/CF1038_d1_r2/Snap-858-Image Export-34.tif	1	TRUE	777.01
CF1038	d1	r2	../d1_r2_triple/CF1038_d1_r2/Snap-858-Image Export-34.tif	3	TRUE	706.469
CF1038	d1	r2	../d1_r2_triple/CF1038_d1_r2/Snap-858-Image Export-34.tif	4	TRUE	769.87
CF1038	d1	r2	../d1_r2_triple/CF1038_d1_r2/Snap-858-Image Export-34.tif	5	TRUE	746.918
CF1038	d1	r2	../d1_r2_triple/CF1038_d1_r2/Snap-858-Image Export-34.tif	7	TRUE	731.29
CF1038	d1	r2	../d1_r2_triple/CF1038_d1_r2/Snap-858-Image Export-34.tif	8	TRUE	714.719
CF1038	d1	r2	../d1_r2_triple/CF1038_d1_r2/Snap-858-Image Export-34.tif	9	TRUE	738.836
CF1038	d1	r2	../d1_r2_triple/CF1038_d1_r2/Snap-859-Image Export-35.tif	0	TRUE	779.377
CF1038	d1	r2	../d1_r2_triple/CF1038_d1_r2/Snap-859-Image Export-35.tif	1	TRUE	807.507
CF1038	d1	r2	../d1_r2_triple/CF1038_d1_r2/Snap-859-Image Export-35.tif	2	TRUE	753.169
CF1038	d1	r2	../d1_r2_triple/CF1038_d1_r2/Snap-825-Image Export-01.tif	0	TRUE	747.99
CF1038	d1	r2	../d1_r2_triple/CF1038_d1_r2/Snap-826-Image Export-02.tif	0	TRUE	718.657
CF1038	d1	r2	../d1_r2_triple/CF1038_d1_r2/Snap-826-Image Export-02.tif	1	TRUE	752.541
CF1038	d1	r2	../d1_r2_triple/CF1038_d1_r2/Snap-826-Image Export-02.tif	2	TRUE	704.454
CF1038	d1	r2	../d1_r2_triple/CF1038_d1_r2/Snap-846-Image Export-22.tif	0	TRUE	740.314
CF1038	d1	r2	../d1_r2_triple/CF1038_d1_r2/Snap-846-Image Export-22.tif	1	TRUE	659.492
CF1038	d1	r2	../d1_r2_triple/CF1038_d1_r2/Snap-846-Image Export-22.tif	2	TRUE	755.444
CF1038	d1	r2	../d1_r2_triple/CF1038_d1_r2/Snap-846-Image Export-22.tif	3	TRUE	713.831
CF1038	d1	r2	../d1_r2_triple/CF1038_d1_r2/Snap-844-Image Export-20.tif	1	TRUE	742.275
CF1038	d1	r2	../d1_r2_triple/CF1038_d1_r2/Snap-844-Image Export-20.tif	2	TRUE	753.077
CF1038	d1	r2	../d1_r2_triple/CF1038_d1_r2/Snap-844-Image Export-20.tif	3	TRUE	750.266
CF1038	d1	r2	../d1_r2_triple/CF1038_d1_r2/Snap-844-Image Export-20.tif	5	TRUE	733.565
CF1038	d1	r2	../d1_r2_triple/CF1038_d1_r2/Snap-843-Image Export-19.tif	0	TRUE	734.821
CF1038	d1	r2	../d1_r2_triple/CF1038_d1_r2/Snap-843-Image Export-19.tif	1	TRUE	730.976
CF1038	d1	r2	../d1_r2_triple/CF1038_d1_r2/Snap-843-Image Export-19.tif	2	TRUE	774.382
CF1038	d1	r2	../d1_r2_triple/CF1038_d1_r2/Snap-842-Image Export-18.tif	0	TRUE	801.662
CF1038	d1	r2	../d1_r2_triple/CF1038_d1_r2/Snap-842-Image Export-18.tif	1	TRUE	726.555
CF1038	d1	r2	../d1_r2_triple/CF1038_d1_r2/Snap-842-Image Export-18.tif	2	TRUE	742.812
CF1038	d1	r2	../d1_r2_triple/CF1038_d1_r2/Snap-845-Image Export-21.tif	0	TRUE	727.183
CF1038	d1	r2	../d1_r2_triple/CF1038_d1_r2/Snap-845-Image Export-21.tif	2	TRUE	789.604
CF1038	d1	r2	../d1_r2_triple/CF1038_d1_r2/Snap-845-Image Export-21.tif	3	TRUE	727.314
CF1038	d1	r2	../d1_r2_triple/CF1038_d1_r2/Snap-845-Image Export-21.tif	4	TRUE	745.087
CF1038	d1	r2	../d1_r2_triple/CF1038_d1_r2/Snap-845-Image Export-21.tif	5	TRUE	798.039
CF1038	d1	r2	../d1_r2_triple/CF1038_d1_r2/Snap-845-Image Export-21.tif	6	TRUE	769.87
CF1038	d1	r2	../d1_r2_triple/CF1038_d1_r2/Snap-839-Image Export-15.tif	0	TRUE	735.802
CF1038	d1	r2	../d1_r2_triple/CF1038_d1_r2/Snap-839-Image Export-15.tif	1	TRUE	733.213
CF1038	d1	r2	../d1_r2_triple/CF1038_d1_r2/Snap-839-Image Export-15.tif	2	TRUE	759.42
CF1038	d1	r2	../d1_r2_triple/CF1038_d1_r2/Snap-839-Image Export-15.tif	4	TRUE	769.019
CF1038	d1	r2	../d1_r2_triple/CF1038_d1_r2/Snap-838-Image Export-14.tif	0	TRUE	743.792
CF1038	d1	r2	../d1_r2_triple/CF1038_d1_r2/Snap-838-Image Export-14.tif	1	TRUE	733.787
CF1038	d1	r2	../d1_r2_triple/CF1038_d1_r2/Snap-838-Image Export-14.tif	2	TRUE	737.541
LRB444	d1	r2	../d1_r2_triple/LRB444_d1_r2/Snap-865-Image Export-41.tif	0	TRUE	872.832
LRB444	d1	r2	../d1_r2_triple/LRB444_d1_r2/Snap-864-Image Export-40.tif	0	TRUE	858.628
LRB444	d1	r2	../d1_r2_triple/LRB444_d1_r2/Snap-867-Image Export-43.tif	0	TRUE	859.663
LRB444	d1	r2	../d1_r2_triple/LRB444_d1_r2/Snap-879-Image Export-55.tif	1	TRUE	868.097
LRB444	d1	r2	../d1_r2_triple/LRB444_d1_r2/Snap-879-Image Export-55.tif	2	TRUE	851.044
LRB444	d1	r2	../d1_r2_triple/LRB444_d1_r2/Snap-878-Image Export-54.tif	2	TRUE	829.165
LRB444	d1	r2	../d1_r2_triple/LRB444_d1_r2/Snap-878-Image Export-54.tif	3	TRUE	855.242
LRB444	d1	r2	../d1_r2_triple/LRB444_d1_r2/Snap-871-Image Export-47.tif	0	TRUE	874.126
LRB444	d1	r2	../d1_r2_triple/LRB444_d1_r2/Snap-870-Image Export-46.tif	0	TRUE	851.488
LRB444	d1	r2	../d1_r2_triple/LRB444_d1_r2/Snap-868-Image Export-44.tif	0	TRUE	883.189
LRB444	d1	r2	../d1_r2_triple/LRB444_d1_r2/Snap-880-Image Export-56.tif	1	TRUE	827.426
LRB444	d1	r2	../d1_r2_triple/LRB444_d1_r2/Snap-877-Image Export-53.tif	0	TRUE	867.431
LRB444	d1	r2	../d1_r2_triple/LRB444_d1_r2/Snap-877-Image Export-53.tif	1	TRUE	855.058
LRB444	d1	r2	../d1_r2_triple/LRB444_d1_r2/Snap-875-Image Export-51.tif	0	TRUE	884.039
LRB444	d1	r2	../d1_r2_triple/LRB444_d1_r2/Snap-875-Image Export-51.tif	1	TRUE	880.025
LRB444	d1	r2	../d1_r2_triple/LRB444_d1_r2/Snap-875-Image Export-51.tif	2	TRUE	838.764
LRB444	d1	r2	../d1_r2_triple/LRB444_d1_r2/Snap-874-Image Export-50.tif	0	TRUE	840.725
LRB444	d1	r2	../d1_r2_triple/LRB444_d1_r2/Snap-900-Image Export-76.tif	0	TRUE	818.493
LRB444	d1	r2	../d1_r2_triple/LRB444_d1_r2/Snap-900-Image Export-76.tif	1	TRUE	648.414
LRB444	d1	r2	../d1_r2_triple/LRB444_d1_r2/Snap-883-Image Export-59.tif	0	TRUE	892.972
LRB444	d1	r2	../d1_r2_triple/LRB444_d1_r2/Snap-884-Image Export-60.tif	0	TRUE	842.74
LRB444	d1	r2	../d1_r2_triple/LRB444_d1_r2/Snap-885-Image Export-61.tif	1	TRUE	835.102
LRB444	d1	r2	../d1_r2_triple/LRB444_d1_r2/Snap-882-Image Export-58.tif	0	TRUE	878.324
LRB444	d1	r2	../d1_r2_triple/LRB444_d1_r2/Snap-886-Image Export-62.tif	0	TRUE	825.817
LRB444	d1	r2	../d1_r2_triple/LRB444_d1_r2/Snap-898-Image Export-74.tif	0	TRUE	868.541
LRB444	d1	r2	../d1_r2_triple/LRB444_d1_r2/Snap-898-Image Export-74.tif	1	TRUE	650.782
LRB444	d1	r2	../d1_r2_triple/LRB444_d1_r2/Snap-873-Image Export-49.tif	0	TRUE	898.779
LRB444	d1	r2	../d1_r2_triple/LRB444_d1_r2/Snap-873-Image Export-49.tif	1	TRUE	905.383
LRB444	d1	r2	../d1_r2_triple/LRB444_d1_r2/Snap-899-Image Export-75.tif	0	TRUE	813.629
LRB444	d1	r2	../d1_r2_triple/LRB444_d1_r2/Snap-872-Image Export-48.tif	0	TRUE	899.668
LRB444	d1	r2	../d1_r2_triple/LRB444_d1_r2/Snap-872-Image Export-48.tif	1	TRUE	907.305
LRB444	d1	r2	../d1_r2_triple/LRB444_d1_r2/Snap-890-Image Export-66.tif	0	TRUE	895.784
LRB444	d1	r2	../d1_r2_triple/LRB444_d1_r2/Snap-890-Image Export-66.tif	1	TRUE	854.262
LRB444	d1	r2	../d1_r2_triple/LRB444_d1_r2/Snap-890-Image Export-66.tif	2	TRUE	885.648
LRB444	d1	r2	../d1_r2_triple/LRB444_d1_r2/Snap-890-Image Export-66.tif	4	TRUE	843.054
LRB444	d1	r2	../d1_r2_triple/LRB444_d1_r2/Snap-891-Image Export-67.tif	0	TRUE	878.547
LRB444	d1	r2	../d1_r2_triple/LRB444_d1_r2/Snap-891-Image Export-67.tif	1	TRUE	883.281
LRB444	d1	r2	../d1_r2_triple/LRB444_d1_r2/Snap-888-Image Export-64.tif	0	TRUE	904.088
LRB444	d1	r2	../d1_r2_triple/LRB444_d1_r2/Snap-888-Image Export-64.tif	1	TRUE	895.653
LRB444	d1	r2	../d1_r2_triple/LRB444_d1_r2/Snap-888-Image Export-64.tif	2	TRUE	863.861
LRB444	d1	r2	../d1_r2_triple/LRB444_d1_r2/Snap-888-Image Export-64.tif	4	TRUE	848.861
LRB444	d1	r2	../d1_r2_triple/LRB444_d1_r2/Snap-889-Image Export-65.tif	0	TRUE	850.73
LRB444	d1	r2	../d1_r2_triple/LRB444_d1_r2/Snap-889-Image Export-65.tif	1	TRUE	866.894
LRB444	d1	r2	../d1_r2_triple/LRB444_d1_r2/Snap-897-Image Export-73.tif	0	TRUE	760.141
LRB444	d1	r2	../d1_r2_triple/LRB444_d1_r2/Snap-897-Image Export-73.tif	1	TRUE	837.653
LRB444	d1	r2	../d1_r2_triple/LRB444_d1_r2/Snap-895-Image Export-71.tif	0	TRUE	878.416
LRB444	d1	r2	../d1_r2_triple/LRB444_d1_r2/Snap-895-Image Export-71.tif	1	TRUE	749.507
LRB456	d1	r2	../d1_r2_triple/LRB456_d1_r2/Snap-923-Image Export-99.tif	0	TRUE	793.044
LRB456	d1	r2	../d1_r2_triple/LRB456_d1_r2/Snap-916-Image Export-92.tif	0	TRUE	824.522
LRB456	d1	r2	../d1_r2_triple/LRB456_d1_r2/Snap-916-Image Export-92.tif	1	TRUE	774.512
LRB456	d1	r2	../d1_r2_triple/LRB456_d1_r2/Snap-917-Image Export-93.tif	1	TRUE	751.56
LRB456	d1	r2	../d1_r2_triple/LRB456_d1_r2/Snap-917-Image Export-93.tif	3	TRUE	767.411
LRB456	d1	r2	../d1_r2_triple/LRB456_d1_r2/Snap-917-Image Export-93.tif	4	TRUE	728.348
LRB456	d1	r2	../d1_r2_triple/LRB456_d1_r2/Snap-917-Image Export-93.tif	6	TRUE	726.961
LRB456	d1	r2	../d1_r2_triple/LRB456_d1_r2/Snap-922-Image Export-98.tif	2	TRUE	749.377
LRB456	d1	r2	../d1_r2_triple/LRB456_d1_r2/Snap-922-Image Export-98.tif	3	TRUE	779.913
LRB456	d1	r2	../d1_r2_triple/LRB456_d1_r2/Snap-914-Image Export-90.tif	0	TRUE	832.827
LRB456	d1	r2	../d1_r2_triple/LRB456_d1_r2/Snap-915-Image Export-91.tif	0	TRUE	814.165
LRB456	d1	r2	../d1_r2_triple/LRB456_d1_r2/Snap-915-Image Export-91.tif	1	TRUE	713.386
LRB456	d1	r2	../d1_r2_triple/LRB456_d1_r2/Snap-915-Image Export-91.tif	2	TRUE	789.918
LRB456	d1	r2	../d1_r2_triple/LRB456_d1_r2/Snap-915-Image Export-91.tif	4	TRUE	720.488
LRB456	d1	r2	../d1_r2_triple/LRB456_d1_r2/Snap-938-Image Export-114.tif	1	TRUE	779.063
LRB456	d1	r2	../d1_r2_triple/LRB456_d1_r2/Snap-938-Image Export-114.tif	2	TRUE	777.102
LRB456	d1	r2	../d1_r2_triple/LRB456_d1_r2/Snap-938-Image Export-114.tif	3	TRUE	739.594
LRB456	d1	r2	../d1_r2_triple/LRB456_d1_r2/Snap-937-Image Export-113.tif	0	TRUE	793.266
LRB456	d1	r2	../d1_r2_triple/LRB456_d1_r2/Snap-937-Image Export-113.tif	1	TRUE	727.091
LRB456	d1	r2	../d1_r2_triple/LRB456_d1_r2/Snap-937-Image Export-113.tif	3	TRUE	761.159
LRB456	d1	r2	../d1_r2_triple/LRB456_d1_r2/Snap-909-Image Export-85.tif	1	TRUE	691.285
LRB456	d1	r2	../d1_r2_triple/LRB456_d1_r2/Snap-910-Image Export-86.tif	0	TRUE	646.676
LRB456	d1	r2	../d1_r2_triple/LRB456_d1_r2/Snap-925-Image Export-101.tif	0	TRUE	793.136
LRB456	d1	r2	../d1_r2_triple/LRB456_d1_r2/Snap-925-Image Export-101.tif	1	TRUE	712
LRB456	d1	r2	../d1_r2_triple/LRB456_d1_r2/Snap-925-Image Export-101.tif	2	TRUE	741.517
LRB456	d1	r2	../d1_r2_triple/LRB456_d1_r2/Snap-925-Image Export-101.tif	3	TRUE	803.217
LRB456	d1	r2	../d1_r2_triple/LRB456_d1_r2/Snap-925-Image Export-101.tif	4	TRUE	748.212
LRB456	d1	r2	../d1_r2_triple/LRB456_d1_r2/Snap-911-Image Export-87.tif	0	TRUE	751.468
LRB456	d1	r2	../d1_r2_triple/LRB456_d1_r2/Snap-918-Image Export-94.tif	2	TRUE	713.7
LRB456	d1	r2	../d1_r2_triple/LRB456_d1_r2/Snap-918-Image Export-94.tif	4	TRUE	717.178
LRB456	d1	r2	../d1_r2_triple/LRB456_d1_r2/Snap-918-Image Export-94.tif	6	TRUE	745.623
LRB456	d1	r2	../d1_r2_triple/LRB456_d1_r2/Snap-918-Image Export-94.tif	8	TRUE	664.449
LRB456	d1	r2	../d1_r2_triple/LRB456_d1_r2/Snap-919-Image Export-95.tif	1	TRUE	773.44
LRB456	d1	r2	../d1_r2_triple/LRB456_d1_r2/Snap-919-Image Export-95.tif	2	TRUE	792.193
LRB456	d1	r2	../d1_r2_triple/LRB456_d1_r2/Snap-919-Image Export-95.tif	3	TRUE	822.377
LRB456	d1	r2	../d1_r2_triple/LRB456_d1_r2/Snap-919-Image Export-95.tif	4	TRUE	822.913
LRB456	d1	r2	../d1_r2_triple/LRB456_d1_r2/Snap-919-Image Export-95.tif	5	TRUE	672.753
LRB456	d1	r2	../d1_r2_triple/LRB456_d1_r2/Snap-924-Image Export-100.tif	0	TRUE	798.353
LRB456	d1	r2	../d1_r2_triple/LRB456_d1_r2/Snap-904-Image Export-80.tif	0	TRUE	701.956
LRB456	d1	r2	../d1_r2_triple/LRB456_d1_r2/Snap-904-Image Export-80.tif	1	TRUE	608.502
LRB456	d1	r2	../d1_r2_triple/LRB456_d1_r2/Snap-904-Image Export-80.tif	2	TRUE	714.053
LRB456	d1	r2	../d1_r2_triple/LRB456_d1_r2/Snap-905-Image Export-81.tif	1	TRUE	754.334
LRB456	d1	r2	../d1_r2_triple/LRB456_d1_r2/Snap-905-Image Export-81.tif	2	TRUE	840.373
LRB456	d1	r2	../d1_r2_triple/LRB456_d1_r2/Snap-906-Image Export-82.tif	0	TRUE	695.797
LRB456	d1	r2	../d1_r2_triple/LRB456_d1_r2/Snap-903-Image Export-79.tif	1	TRUE	738.705
LRB456	d1	r2	../d1_r2_triple/LRB456_d1_r2/Snap-903-Image Export-79.tif	2	TRUE	741.739
LRB456	d1	r2	../d1_r2_triple/LRB456_d1_r2/Snap-903-Image Export-79.tif	3	TRUE	728.7
LRB456	d1	r2	../d1_r2_triple/LRB456_d1_r2/Snap-903-Image Export-79.tif	4	TRUE	757.681
LRB456	d1	r2	../d1_r2_triple/LRB456_d1_r2/Snap-936-Image Export-112.tif	0	TRUE	754.15
LRB456	d1	r2	../d1_r2_triple/LRB456_d1_r2/Snap-927-Image Export-103.tif	0	TRUE	717.715
LRB456	d1	r2	../d1_r2_triple/LRB456_d1_r2/Snap-927-Image Export-103.tif	2	TRUE	794.339
LRB456	d1	r2	../d1_r2_triple/LRB456_d1_r2/Snap-927-Image Export-103.tif	3	TRUE	712.85
LRB456	d1	r2	../d1_r2_triple/LRB456_d1_r2/Snap-935-Image Export-111.tif	0	TRUE	774.29
LRB456	d1	r2	../d1_r2_triple/LRB456_d1_r2/Snap-935-Image Export-111.tif	1	TRUE	711.869
LRB456	d1	r2	../d1_r2_triple/LRB456_d1_r2/Snap-935-Image Export-111.tif	2	TRUE	672.531
LRB456	d1	r2	../d1_r2_triple/LRB456_d1_r2/Snap-935-Image Export-111.tif	3	TRUE	757.237
LRB456	d1	r2	../d1_r2_triple/LRB456_d1_r2/Snap-933-Image Export-109.tif	1	TRUE	829.923
LRB456	d1	r2	../d1_r2_triple/LRB456_d1_r2/Snap-933-Image Export-109.tif	2	TRUE	805.677
LRB456	d1	r2	../d1_r2_triple/LRB456_d1_r2/Snap-928-Image Export-104.tif	0	TRUE	747.01
LRB456	d1	r2	../d1_r2_triple/LRB456_d1_r2/Snap-928-Image Export-104.tif	1	TRUE	756.831
LRB456	d1	r2	../d1_r2_triple/LRB456_d1_r2/Snap-928-Image Export-104.tif	2	TRUE	758.57
LRB456	d1	r2	../d1_r2_triple/LRB456_d1_r2/Snap-912-Image Export-88.tif	2	TRUE	758.348
LRB456	d1	r2	../d1_r2_triple/LRB456_d1_r2/Snap-912-Image Export-88.tif	4	TRUE	742.812
LRB456	d1	r2	../d1_r2_triple/LRB456_d1_r2/Snap-912-Image Export-88.tif	6	TRUE	681.057
LRB456	d1	r2	../d1_r2_triple/LRB456_d1_r2/Snap-913-Image Export-89.tif	0	TRUE	715.309
LRB456	d1	r2	../d1_r2_triple/LRB456_d1_r2/Snap-913-Image Export-89.tif	1	TRUE	762.768
LRB456	d1	r2	../d1_r2_triple/LRB456_d1_r2/Snap-913-Image Export-89.tif	2	TRUE	695.077
LRB456	d1	r2	../d1_r2_triple/LRB456_d1_r2/Snap-913-Image Export-89.tif	4	TRUE	784.111
LRB456	d1	r2	../d1_r2_triple/LRB456_d1_r2/Snap-934-Image Export-110.tif	1	TRUE	710.391
LRB456	d1	r2	../d1_r2_triple/LRB456_d1_r2/Snap-934-Image Export-110.tif	3	TRUE	816.57
LRB456	d1	r2	../d1_r2_triple/LRB456_d1_r2/Snap-934-Image Export-110.tif	4	TRUE	813.13
LRB456	d1	r2	../d1_r2_triple/LRB456_d1_r2/Snap-932-Image Export-108.tif	0	TRUE	724.15
LRB456	d1	r2	../d1_r2_triple/LRB456_d1_r2/Snap-931-Image Export-107.tif	0	TRUE	707.135
LRB456	d1	r2	../d1_r2_triple/LRB456_d1_r2/Snap-926-Image Export-102.tif	1	TRUE	754.242
LRB456	d1	r2	../d1_r2_triple/LRB456_d1_r2/Snap-926-Image Export-102.tif	2	TRUE	797.908
LRB456	d1	r2	../d1_r2_triple/LRB456_d1_r2/Snap-926-Image Export-102.tif	3	TRUE	724.188
LRB456	d1	r2	../d1_r2_triple/LRB456_d1_r2/Snap-926-Image Export-102.tif	7	TRUE	773.218
LRB456	d1	r2	../d1_r2_triple/LRB456_d1_r2/Snap-929-Image Export-105.tif	0	TRUE	740.13
LRB456	d1	r2	../d1_r2_triple/LRB456_d1_r2/Snap-929-Image Export-105.tif	1	TRUE	658.864
LRB456	d1	r2	../d1_r2_triple/LRB456_d1_r2/Snap-921-Image Export-97.tif	0	TRUE	849.88
LRB456	d1	r2	../d1_r2_triple/LRB456_d1_r2/Snap-921-Image Export-97.tif	1	TRUE	778.841
LRB456	d1	r2	../d1_r2_triple/LRB456_d1_r2/Snap-921-Image Export-97.tif	2	TRUE	719.676
LRB456	d1	r2	../d1_r2_triple/LRB456_d1_r2/Snap-921-Image Export-97.tif	3	TRUE	762.416
LRB456	d1	r2	../d1_r2_triple/LRB456_d1_r2/Snap-920-Image Export-96.tif	0	TRUE	756.701
LRB456	d1	r2	../d1_r2_triple/LRB456_d1_r2/Snap-920-Image Export-96.tif	1	TRUE	957.982
LRB456	d1	r2	../d1_r2_triple/LRB456_d1_r2/Snap-920-Image Export-96.tif	3	TRUE	725.575
LRB456	d1	r2	../d1_r2_triple/LRB456_d1_r2/Snap-920-Image Export-96.tif	4	TRUE	746.604
N2	d1	r2	../d1_r2_triple/N2_d1_r2/Snap-791-Image Export-133.tif	0	TRUE	829.257
N2	d1	r2	../d1_r2_triple/N2_d1_r2/Snap-791-Image Export-133.tif	1	TRUE	853.005
N2	d1	r2	../d1_r2_triple/N2_d1_r2/Snap-791-Image Export-133.tif	2	TRUE	833.585
N2	d1	r2	../d1_r2_triple/N2_d1_r2/Snap-791-Image Export-133.tif	4	TRUE	809.653
N2	d1	r2	../d1_r2_triple/N2_d1_r2/Snap-820-Image Export-162.tif	0	TRUE	804.788
N2	d1	r2	../d1_r2_triple/N2_d1_r2/Snap-820-Image Export-162.tif	1	TRUE	818.917
N2	d1	r2	../d1_r2_triple/N2_d1_r2/Snap-820-Image Export-162.tif	2	TRUE	802.329
N2	d1	r2	../d1_r2_triple/N2_d1_r2/Snap-820-Image Export-162.tif	3	TRUE	813.629
N2	d1	r2	../d1_r2_triple/N2_d1_r2/Snap-820-Image Export-162.tif	4	TRUE	809.745
N2	d1	r2	../d1_r2_triple/N2_d1_r2/Snap-818-Image Export-160.tif	0	TRUE	858.054
N2	d1	r2	../d1_r2_triple/N2_d1_r2/Snap-818-Image Export-160.tif	1	TRUE	854.392
N2	d1	r2	../d1_r2_triple/N2_d1_r2/Snap-811-Image Export-153.tif	0	TRUE	799.203
N2	d1	r2	../d1_r2_triple/N2_d1_r2/Snap-811-Image Export-153.tif	2	TRUE	809.783
N2	d1	r2	../d1_r2_triple/N2_d1_r2/Snap-797-Image Export-139.tif	0	TRUE	846.088
N2	d1	r2	../d1_r2_triple/N2_d1_r2/Snap-797-Image Export-139.tif	1	TRUE	856.981
N2	d1	r2	../d1_r2_triple/N2_d1_r2/Snap-797-Image Export-139.tif	2	TRUE	825.373
N2	d1	r2	../d1_r2_triple/N2_d1_r2/Snap-814-Image Export-156.tif	1	TRUE	792.6
N2	d1	r2	../d1_r2_triple/N2_d1_r2/Snap-814-Image Export-156.tif	2	TRUE	848.991
N2	d1	r2	../d1_r2_triple/N2_d1_r2/Snap-814-Image Export-156.tif	3	TRUE	827.426
N2	d1	r2	../d1_r2_triple/N2_d1_r2/Snap-814-Image Export-156.tif	4	TRUE	846.716
N2	d1	r2	../d1_r2_triple/N2_d1_r2/Snap-783-Image Export-125.tif	0	TRUE	878.416
N2	d1	r2	../d1_r2_triple/N2_d1_r2/Snap-783-Image Export-125.tif	1	TRUE	754.019
N2	d1	r2	../d1_r2_triple/N2_d1_r2/Snap-783-Image Export-125.tif	2	TRUE	857.073
N2	d1	r2	../d1_r2_triple/N2_d1_r2/Snap-783-Image Export-125.tif	4	TRUE	824.43
N2	d1	r2	../d1_r2_triple/N2_d1_r2/Snap-809-Image Export-151.tif	0	TRUE	522.907
N2	d1	r2	../d1_r2_triple/N2_d1_r2/Snap-809-Image Export-151.tif	1	TRUE	822.783
N2	d1	r2	../d1_r2_triple/N2_d1_r2/Snap-809-Image Export-151.tif	2	TRUE	744.735
N2	d1	r2	../d1_r2_triple/N2_d1_r2/Snap-773-Image Export-115.tif	0	TRUE	820.73
N2	d1	r2	../d1_r2_triple/N2_d1_r2/Snap-789-Image Export-131.tif	0	TRUE	820.324
N2	d1	r2	../d1_r2_triple/N2_d1_r2/Snap-789-Image Export-131.tif	1	TRUE	833.715
N2	d1	r2	../d1_r2_triple/N2_d1_r2/Snap-789-Image Export-131.tif	2	TRUE	847.068
N2	d1	r2	../d1_r2_triple/N2_d1_r2/Snap-794-Image Export-136.tif	0	TRUE	819.436
N2	d1	r2	../d1_r2_triple/N2_d1_r2/Snap-794-Image Export-136.tif	1	TRUE	824.744
N2	d1	r2	../d1_r2_triple/N2_d1_r2/Snap-794-Image Export-136.tif	2	TRUE	846.624
N2	d1	r2	../d1_r2_triple/N2_d1_r2/Snap-803-Image Export-145.tif	0	TRUE	826.131
N2	d1	r2	../d1_r2_triple/N2_d1_r2/Snap-810-Image Export-152.tif	0	TRUE	845.107
N2	d1	r2	../d1_r2_triple/N2_d1_r2/Snap-810-Image Export-152.tif	1	TRUE	791.749
N2	d1	r2	../d1_r2_triple/N2_d1_r2/Snap-819-Image Export-161.tif	0	TRUE	845.551
N2	d1	r2	../d1_r2_triple/N2_d1_r2/Snap-819-Image Export-161.tif	1	TRUE	791.879
N2	d1	r2	../d1_r2_triple/N2_d1_r2/Snap-819-Image Export-161.tif	2	TRUE	857.648
N2	d1	r2	../d1_r2_triple/N2_d1_r2/Snap-821-Image Export-163.tif	0	TRUE	838.764
N2	d1	r2	../d1_r2_triple/N2_d1_r2/Snap-821-Image Export-163.tif	1	TRUE	711.241
N2	d1	r2	../d1_r2_triple/N2_d1_r2/Snap-795-Image Export-137.tif	0	TRUE	826.261
N2	d1	r2	../d1_r2_triple/N2_d1_r2/Snap-795-Image Export-137.tif	2	TRUE	867.393
N2	d1	r2	../d1_r2_triple/N2_d1_r2/Snap-816-Image Export-158.tif	0	TRUE	830.367
N2	d1	r2	../d1_r2_triple/N2_d1_r2/Snap-816-Image Export-158.tif	1	TRUE	783.353
N2	d1	r2	../d1_r2_triple/N2_d1_r2/Snap-816-Image Export-158.tif	2	TRUE	796.3
N2	d1	r2	../d1_r2_triple/N2_d1_r2/Snap-802-Image Export-144.tif	0	TRUE	756.165
N2	d1	r2	../d1_r2_triple/N2_d1_r2/Snap-802-Image Export-144.tif	2	TRUE	773.754
N2	d1	r2	../d1_r2_triple/N2_d1_r2/Snap-788-Image Export-130.tif	0	TRUE	832.827
N2	d1	r2	../d1_r2_triple/N2_d1_r2/Snap-824-Image Export-166.tif	1	TRUE	801.164
N2	d1	r2	../d1_r2_triple/N2_d1_r2/Snap-808-Image Export-150.tif	0	TRUE	788.44
N2	d1	r2	../d1_r2_triple/N2_d1_r2/Snap-808-Image Export-150.tif	1	TRUE	856.981
N2	d1	r2	../d1_r2_triple/N2_d1_r2/Snap-808-Image Export-150.tif	2	TRUE	841.261
N2	d1	r2	../d1_r2_triple/N2_d1_r2/Snap-796-Image Export-138.tif	0	TRUE	844.387
N2	d1	r2	../d1_r2_triple/N2_d1_r2/Snap-796-Image Export-138.tif	2	TRUE	862.474
N2	d1	r2	../d1_r2_triple/N2_d1_r2/Snap-796-Image Export-138.tif	3	TRUE	838.856
N2	d1	r2	../d1_r2_triple/N2_d1_r2/Snap-796-Image Export-138.tif	4	TRUE	848.991
N2	d1	r2	../d1_r2_triple/N2_d1_r2/Snap-815-Image Export-157.tif	0	TRUE	889.846
N2	d1	r2	../d1_r2_triple/N2_d1_r2/Snap-815-Image Export-157.tif	1	TRUE	724.058
N2	d1	r2	../d1_r2_triple/N2_d1_r2/Snap-782-Image Export-124.tif	0	TRUE	781.078
N2	d1	r2	../d1_r2_triple/N2_d1_r2/Snap-782-Image Export-124.tif	1	TRUE	835.86
N2	d1	r2	../d1_r2_triple/N2_d1_r2/Snap-822-Image Export-164.tif	1	TRUE	848.141
N2	d1	r2	../d1_r2_triple/N2_d1_r2/Snap-822-Image Export-164.tif	3	TRUE	816.348
N2	d1	r2	../d1_r2_triple/N2_d1_r2/Snap-822-Image Export-164.tif	5	TRUE	786.034
N2	d1	r2	../d1_r2_triple/N2_d1_r2/Snap-822-Image Export-164.tif	6	TRUE	794.377
N2	d1	r2	../d1_r2_triple/N2_d1_r2/Snap-822-Image Export-164.tif	8	TRUE	875.291
N2	d1	r2	../d1_r2_triple/N2_d1_r2/Snap-777-Image Export-119.tif	0	TRUE	868.189
N2	d1	r2	../d1_r2_triple/N2_d1_r2/Snap-804-Image Export-146.tif	0	TRUE	828.406
N2	d1	r2	../d1_r2_triple/N2_d1_r2/Snap-787-Image Export-129.tif	0	TRUE	781.522
N2	d1	r2	../d1_r2_triple/N2_d1_r2/Snap-787-Image Export-129.tif	1	TRUE	811.668
N2	d1	r2	../d1_r2_triple/N2_d1_r2/Snap-787-Image Export-129.tif	2	TRUE	861.808
N2	d1	r2	../d1_r2_triple/N2_d1_r2/Snap-793-Image Export-135.tif	0	TRUE	721.284
N2	d1	r2	../d1_r2_triple/N2_d1_r2/Snap-807-Image Export-149.tif	0	TRUE	826.353
N2	d1	r2	../d1_r2_triple/N2_d1_r2/Snap-807-Image Export-149.tif	1	TRUE	821.619
N2	d1	r2	../d1_r2_triple/N2_d1_r2/Snap-807-Image Export-149.tif	3	TRUE	865.155
N2	d1	r2	../d1_r2_triple/N2_d1_r2/Snap-798-Image Export-140.tif	0	TRUE	837.691
N2	d1	r2	../d1_r2_triple/N2_d1_r2/Snap-798-Image Export-140.tif	3	TRUE	839.614
N2	d1	r2	../d1_r2_triple/N2_d1_r2/Snap-813-Image Export-155.tif	0	TRUE	802.643
N2	d1	r2	../d1_r2_triple/N2_d1_r2/Snap-813-Image Export-155.tif	1	TRUE	769.778
N2	d1	r2	../d1_r2_triple/N2_d1_r2/Snap-813-Image Export-155.tif	2	TRUE	860.199
N2	d1	r2	../d1_r2_triple/N2_d1_r2/Snap-813-Image Export-155.tif	3	TRUE	787.015
N2	d1	r2	../d1_r2_triple/N2_d1_r2/Snap-813-Image Export-155.tif	4	TRUE	840.779
N2	d1	r2	../d1_r2_triple/N2_d1_r2/Snap-781-Image Export-123.tif	1	TRUE	808.802
N2	d1	r2	../d1_r2_triple/N2_d1_r2/Snap-778-Image Export-120.tif	0	TRUE	854.484
N2	d1	r2	../d1_r2_triple/N2_d1_r2/Snap-778-Image Export-120.tif	1	TRUE	859.034
N2	d1	r2	../d1_r2_triple/N2_d1_r2/Snap-801-Image Export-143.tif	0	TRUE	864.397
N2	d1	r2	../d1_r2_triple/N2_d1_r2/Snap-801-Image Export-143.tif	1	TRUE	826.131
N2	d1	r2	../d1_r2_triple/N2_d1_r2/Snap-806-Image Export-148.tif	2	TRUE	818.677
N2	d1	r2	../d1_r2_triple/N2_d1_r2/Snap-806-Image Export-148.tif	3	TRUE	822.913
N2	d1	r2	../d1_r2_triple/N2_d1_r2/Snap-806-Image Export-148.tif	4	TRUE	825.059
N2	d1	r2	../d1_r2_triple/N2_d1_r2/Snap-799-Image Export-141.tif	0	TRUE	814.609
N2	d1	r2	../d1_r2_triple/N2_d1_r2/Snap-799-Image Export-141.tif	1	TRUE	854.928
N2	d1	r2	../d1_r2_triple/N2_d1_r2/Snap-785-Image Export-127.tif	0	TRUE	813.851
N2	d1	r2	../d1_r2_triple/N2_d1_r2/Snap-785-Image Export-127.tif	1	TRUE	878.547
N2	d1	r2	../d1_r2_triple/N2_d1_r2/Snap-785-Image Export-127.tif	2	TRUE	830.459
N2	d1	r2	../d1_r2_triple/N2_d1_r2/Snap-785-Image Export-127.tif	3	TRUE	799.295
N2	d1	r2	../d1_r2_triple/N2_d1_r2/Snap-785-Image Export-127.tif	4	TRUE	822.507
N2	d1	r2	../d1_r2_triple/N2_d1_r2/Snap-812-Image Export-154.tif	0	TRUE	843.981
N2	d1	r2	../d1_r2_triple/N2_d1_r2/Snap-812-Image Export-154.tif	1	TRUE	844.387
N2	d1	r2	../d1_r2_triple/N2_d1_r2/Snap-812-Image Export-154.tif	2	TRUE	867.025
N2	d1	r2	../d1_r2_triple/N2_d1_r2/Snap-812-Image Export-154.tif	3	TRUE	850.01
N2	d1	r2	../d1_r2_triple/N2_d1_r2/Snap-812-Image Export-154.tif	5	TRUE	803.087
N2	d1	r2	../d1_r2_triple/N2_d1_r2/Snap-805-Image Export-147.tif	0	TRUE	820.416
N2	d1	r2	../d1_r2_triple/N2_d1_r2/Snap-805-Image Export-147.tif	1	TRUE	811.706
N2	d1	r2	../d1_r2_triple/N2_d1_r2/Snap-805-Image Export-147.tif	2	TRUE	847.957
N2	d1	r2	../d1_r2_triple/N2_d1_r2/Snap-805-Image Export-147.tif	3	TRUE	850.952
N2	d1	r2	../d1_r2_triple/N2_d1_r2/Snap-786-Image Export-128.tif	0	TRUE	851.58
N2	d1	r2	../d1_r2_triple/N2_d1_r2/Snap-786-Image Export-128.tif	1	TRUE	799.425
N2	d1	r2	../d1_r2_triple/N2_d1_r2/Snap-792-Image Export-134.tif	0	TRUE	839.614
N2	d1	r2	../d1_r2_triple/N2_d1_r2/Snap-792-Image Export-134.tif	1	TRUE	832.735
N2	d1	r2	../d1_r2_triple/N2_d1_r2/Snap-792-Image Export-134.tif	2	TRUE	868.411
N2	d1	r2	../d1_r2_triple/N2_d1_r2/Snap-792-Image Export-134.tif	3	TRUE	799.517
N2	d1	r2	../d1_r2_triple/N2_d1_r2/Snap-792-Image Export-134.tif	4	TRUE	745.049
N2	d1	r2	../d1_r2_triple/N2_d1_r2/Snap-823-Image Export-165.tif	1	TRUE	816.976
N2	d1	r2	../d1_r2_triple/N2_d1_r2/Snap-823-Image Export-165.tif	2	TRUE	847.919
N2	d1	r2	../d1_r2_triple/N2_d1_r2/Snap-823-Image Export-165.tif	3	TRUE	737.319
N2	d1	r2	../d1_r2_triple/N2_d1_r2/Snap-776-Image Export-118.tif	0	TRUE	747.768
N2	d1	r2	../d1_r2_triple/N2_d1_r2/Snap-776-Image Export-118.tif	1	TRUE	576.395
N2	d1	r2	../d1_r2_triple/N2_d1_r2/Snap-800-Image Export-142.tif	0	TRUE	830.551
N2	d1	r2	../d1_r2_triple/N2_d1_r2/Snap-800-Image Export-142.tif	1	TRUE	788.846
N2	d1	r2	../d1_r2_triple/N2_d1_r2/Snap-780-Image Export-122.tif	1	TRUE	776.565
N2	d1	r2	../d1_r2_triple/N2_d1_r2/Snap-780-Image Export-122.tif	2	TRUE	744.459
N2	d1	r2	../d1_r2_triple/N2_d1_r2/Snap-779-Image Export-121.tif	0	TRUE	820.991
CF1038	d1	r3	../d1_r3_triple/CF1038_d1_r3/Snap-1006-Image Export-30.tif	0	TRUE	747.454
CF1038	d1	r3	../d1_r3_triple/CF1038_d1_r3/Snap-1006-Image Export-30.tif	1	TRUE	783.981
CF1038	d1	r3	../d1_r3_triple/CF1038_d1_r3/Snap-989-Image Export-13.tif	0	TRUE	802.735
CF1038	d1	r3	../d1_r3_triple/CF1038_d1_r3/Snap-989-Image Export-13.tif	1	TRUE	753.169
CF1038	d1	r3	../d1_r3_triple/CF1038_d1_r3/Snap-993-Image Export-17.tif	0	TRUE	768.261
CF1038	d1	r3	../d1_r3_triple/CF1038_d1_r3/Snap-993-Image Export-17.tif	1	TRUE	838.189
CF1038	d1	r3	../d1_r3_triple/CF1038_d1_r3/Snap-993-Image Export-17.tif	2	TRUE	798.131
CF1038	d1	r3	../d1_r3_triple/CF1038_d1_r3/Snap-993-Image Export-17.tif	3	TRUE	807.377
CF1038	d1	r3	../d1_r3_triple/CF1038_d1_r3/Snap-993-Image Export-17.tif	4	TRUE	796.928
CF1038	d1	r3	../d1_r3_triple/CF1038_d1_r3/Snap-979-Image Export-03.tif	0	TRUE	815.72
CF1038	d1	r3	../d1_r3_triple/CF1038_d1_r3/Snap-979-Image Export-03.tif	2	TRUE	791.841
CF1038	d1	r3	../d1_r3_triple/CF1038_d1_r3/Snap-979-Image Export-03.tif	3	TRUE	770.314
CF1038	d1	r3	../d1_r3_triple/CF1038_d1_r3/Snap-979-Image Export-03.tif	4	TRUE	827.962
CF1038	d1	r3	../d1_r3_triple/CF1038_d1_r3/Snap-992-Image Export-16.tif	1	TRUE	830.774
CF1038	d1	r3	../d1_r3_triple/CF1038_d1_r3/Snap-992-Image Export-16.tif	2	TRUE	801.57
CF1038	d1	r3	../d1_r3_triple/CF1038_d1_r3/Snap-992-Image Export-16.tif	3	TRUE	845.643
CF1038	d1	r3	../d1_r3_triple/CF1038_d1_r3/Snap-992-Image Export-16.tif	4	TRUE	789.696
CF1038	d1	r3	../d1_r3_triple/CF1038_d1_r3/Snap-991-Image Export-15.tif	8	TRUE	807.952
CF1038	d1	r3	../d1_r3_triple/CF1038_d1_r3/Snap-991-Image Export-15.tif	12	TRUE	815.276
CF1038	d1	r3	../d1_r3_triple/CF1038_d1_r3/Snap-991-Image Export-15.tif	13	TRUE	794.247
CF1038	d1	r3	../d1_r3_triple/CF1038_d1_r3/Snap-991-Image Export-15.tif	14	TRUE	740.352
CF1038	d1	r3	../d1_r3_triple/CF1038_d1_r3/Snap-990-Image Export-14.tif	0	TRUE	862.16
CF1038	d1	r3	../d1_r3_triple/CF1038_d1_r3/Snap-990-Image Export-14.tif	2	TRUE	825.503
CF1038	d1	r3	../d1_r3_triple/CF1038_d1_r3/Snap-990-Image Export-14.tif	3	TRUE	801.386
CF1038	d1	r3	../d1_r3_triple/CF1038_d1_r3/Snap-1002-Image Export-26.tif	0	TRUE	815.904
CF1038	d1	r3	../d1_r3_triple/CF1038_d1_r3/Snap-1002-Image Export-26.tif	1	TRUE	814.831
CF1038	d1	r3	../d1_r3_triple/CF1038_d1_r3/Snap-1002-Image Export-26.tif	2	TRUE	844.609
CF1038	d1	r3	../d1_r3_triple/CF1038_d1_r3/Snap-1002-Image Export-26.tif	3	TRUE	808.044
CF1038	d1	r3	../d1_r3_triple/CF1038_d1_r3/Snap-1003-Image Export-27.tif	0	TRUE	806.841
CF1038	d1	r3	../d1_r3_triple/CF1038_d1_r3/Snap-1003-Image Export-27.tif	1	TRUE	787.957
CF1038	d1	r3	../d1_r3_triple/CF1038_d1_r3/Snap-1003-Image Export-27.tif	2	TRUE	797.15
CF1038	d1	r3	../d1_r3_triple/CF1038_d1_r3/Snap-1003-Image Export-27.tif	3	TRUE	822.155
CF1038	d1	r3	../d1_r3_triple/CF1038_d1_r3/Snap-1000-Image Export-24.tif	0	TRUE	880.247
CF1038	d1	r3	../d1_r3_triple/CF1038_d1_r3/Snap-1000-Image Export-24.tif	2	TRUE	767.411
CF1038	d1	r3	../d1_r3_triple/CF1038_d1_r3/Snap-1000-Image Export-24.tif	3	TRUE	806.397
CF1038	d1	r3	../d1_r3_triple/CF1038_d1_r3/Snap-983-Image Export-07.tif	2	TRUE	830.367
CF1038	d1	r3	../d1_r3_triple/CF1038_d1_r3/Snap-983-Image Export-07.tif	3	TRUE	735.044
CF1038	d1	r3	../d1_r3_triple/CF1038_d1_r3/Snap-983-Image Export-07.tif	6	TRUE	796.928
CF1038	d1	r3	../d1_r3_triple/CF1038_d1_r3/Snap-983-Image Export-07.tif	7	TRUE	814.517
CF1038	d1	r3	../d1_r3_triple/CF1038_d1_r3/Snap-983-Image Export-07.tif	11	TRUE	834.972
CF1038	d1	r3	../d1_r3_triple/CF1038_d1_r3/Snap-977-Image Export-01.tif	1	TRUE	778.802
CF1038	d1	r3	../d1_r3_triple/CF1038_d1_r3/Snap-977-Image Export-01.tif	2	TRUE	641.811
CF1038	d1	r3	../d1_r3_triple/CF1038_d1_r3/Snap-977-Image Export-01.tif	4	TRUE	798.981
CF1038	d1	r3	../d1_r3_triple/CF1038_d1_r3/Snap-977-Image Export-01.tif	5	TRUE	799.962
CF1038	d1	r3	../d1_r3_triple/CF1038_d1_r3/Snap-977-Image Export-01.tif	7	TRUE	785.942
CF1038	d1	r3	../d1_r3_triple/CF1038_d1_r3/Snap-987-Image Export-11.tif	1	TRUE	858.498
CF1038	d1	r3	../d1_r3_triple/CF1038_d1_r3/Snap-987-Image Export-11.tif	2	TRUE	872.517
CF1038	d1	r3	../d1_r3_triple/CF1038_d1_r3/Snap-987-Image Export-11.tif	6	TRUE	811.391
CF1038	d1	r3	../d1_r3_triple/CF1038_d1_r3/Snap-987-Image Export-11.tif	8	TRUE	864.213
CF1038	d1	r3	../d1_r3_triple/CF1038_d1_r3/Snap-987-Image Export-11.tif	9	TRUE	793.266
CF1038	d1	r3	../d1_r3_triple/CF1038_d1_r3/Snap-987-Image Export-11.tif	10	TRUE	814.701
CF1038	d1	r3	../d1_r3_triple/CF1038_d1_r3/Snap-987-Image Export-11.tif	11	TRUE	787.015
CF1038	d1	r3	../d1_r3_triple/CF1038_d1_r3/Snap-986-Image Export-10.tif	0	TRUE	796.928
CF1038	d1	r3	../d1_r3_triple/CF1038_d1_r3/Snap-986-Image Export-10.tif	1	TRUE	752.281
CF1038	d1	r3	../d1_r3_triple/CF1038_d1_r3/Snap-986-Image Export-10.tif	4	TRUE	767.725
CF1038	d1	r3	../d1_r3_triple/CF1038_d1_r3/Snap-1008-Image Export-32.tif	0	TRUE	752.817
CF1038	d1	r3	../d1_r3_triple/CF1038_d1_r3/Snap-1008-Image Export-32.tif	1	TRUE	751.56
CF1038	d1	r3	../d1_r3_triple/CF1038_d1_r3/Snap-1008-Image Export-32.tif	2	TRUE	794.116
CF1038	d1	r3	../d1_r3_triple/CF1038_d1_r3/Snap-985-Image Export-09.tif	1	TRUE	805.324
CF1038	d1	r3	../d1_r3_triple/CF1038_d1_r3/Snap-985-Image Export-09.tif	9	TRUE	809.653
CF1038	d1	r3	../d1_r3_triple/CF1038_d1_r3/Snap-999-Image Export-23.tif	0	TRUE	758.44
CF1038	d1	r3	../d1_r3_triple/CF1038_d1_r3/Snap-999-Image Export-23.tif	2	TRUE	828.406
CF1038	d1	r3	../d1_r3_triple/CF1038_d1_r3/Snap-999-Image Export-23.tif	3	TRUE	723.614
CF1038	d1	r3	../d1_r3_triple/CF1038_d1_r3/Snap-996-Image Export-20.tif	1	TRUE	826.353
CF1038	d1	r3	../d1_r3_triple/CF1038_d1_r3/Snap-996-Image Export-20.tif	2	TRUE	737.855
CF1038	d1	r3	../d1_r3_triple/CF1038_d1_r3/Snap-996-Image Export-20.tif	3	TRUE	874.31
CF1038	d1	r3	../d1_r3_triple/CF1038_d1_r3/Snap-997-Image Export-21.tif	0	TRUE	808.58
CF1038	d1	r3	../d1_r3_triple/CF1038_d1_r3/Snap-997-Image Export-21.tif	1	TRUE	836.489
CF1038	d1	r3	../d1_r3_triple/CF1038_d1_r3/Snap-1005-Image Export-29.tif	0	TRUE	766.522
CF1038	d1	r3	../d1_r3_triple/CF1038_d1_r3/Snap-1005-Image Export-29.tif	1	TRUE	798.353
CF1038	d1	r3	../d1_r3_triple/CF1038_d1_r3/Snap-1004-Image Export-28.tif	0	TRUE	775.899
CF1038	d1	r3	../d1_r3_triple/CF1038_d1_r3/Snap-1004-Image Export-28.tif	1	TRUE	784.962
CF1038	d1	r3	../d1_r3_triple/CF1038_d1_r3/Snap-1004-Image Export-28.tif	2	TRUE	765.265
CF1038	d1	r3	../d1_r3_triple/CF1038_d1_r3/Snap-1004-Image Export-28.tif	3	TRUE	791.657
CF1038	d1	r3	../d1_r3_triple/CF1038_d1_r3/Snap-995-Image Export-19.tif	0	TRUE	737.763
CF1038	d1	r3	../d1_r3_triple/CF1038_d1_r3/Snap-995-Image Export-19.tif	1	TRUE	834.251
LRB444	d1	r3	../d1_r3_triple/LRB444_d1_r3/Snap-1024-Image Export-48.tif	1	TRUE	846.938
LRB444	d1	r3	../d1_r3_triple/LRB444_d1_r3/Snap-1024-Image Export-48.tif	2	TRUE	823.856
LRB444	d1	r3	../d1_r3_triple/LRB444_d1_r3/Snap-1024-Image Export-48.tif	3	TRUE	880.377
LRB444	d1	r3	../d1_r3_triple/LRB444_d1_r3/Snap-1024-Image Export-48.tif	4	TRUE	905.252
LRB444	d1	r3	../d1_r3_triple/LRB444_d1_r3/Snap-1024-Image Export-48.tif	5	TRUE	812.778
LRB444	d1	r3	../d1_r3_triple/LRB444_d1_r3/Snap-1025-Image Export-49.tif	0	TRUE	868.281
LRB444	d1	r3	../d1_r3_triple/LRB444_d1_r3/Snap-1025-Image Export-49.tif	1	TRUE	916.146
LRB444	d1	r3	../d1_r3_triple/LRB444_d1_r3/Snap-1025-Image Export-49.tif	3	TRUE	879.933
LRB444	d1	r3	../d1_r3_triple/LRB444_d1_r3/Snap-1025-Image Export-49.tif	4	TRUE	853.005
LRB444	d1	r3	../d1_r3_triple/LRB444_d1_r3/Snap-1025-Image Export-49.tif	5	TRUE	875.291
LRB444	d1	r3	../d1_r3_triple/LRB444_d1_r3/Snap-1025-Image Export-49.tif	6	TRUE	866.45
LRB444	d1	r3	../d1_r3_triple/LRB444_d1_r3/Snap-1039-Image Export-63.tif	0	TRUE	847.474
LRB444	d1	r3	../d1_r3_triple/LRB444_d1_r3/Snap-1039-Image Export-63.tif	1	TRUE	835.86
LRB444	d1	r3	../d1_r3_triple/LRB444_d1_r3/Snap-1039-Image Export-63.tif	2	TRUE	893.861
LRB444	d1	r3	../d1_r3_triple/LRB444_d1_r3/Snap-1039-Image Export-63.tif	3	TRUE	859.034
LRB444	d1	r3	../d1_r3_triple/LRB444_d1_r3/Snap-1039-Image Export-63.tif	4	TRUE	836.397
LRB444	d1	r3	../d1_r3_triple/LRB444_d1_r3/Snap-1038-Image Export-62.tif	0	TRUE	890.827
LRB444	d1	r3	../d1_r3_triple/LRB444_d1_r3/Snap-1038-Image Export-62.tif	1	TRUE	815.996
LRB444	d1	r3	../d1_r3_triple/LRB444_d1_r3/Snap-1038-Image Export-62.tif	2	TRUE	906.233
LRB444	d1	r3	../d1_r3_triple/LRB444_d1_r3/Snap-1017-Image Export-41.tif	2	TRUE	824.836
LRB444	d1	r3	../d1_r3_triple/LRB444_d1_r3/Snap-1017-Image Export-41.tif	3	TRUE	783.667
LRB444	d1	r3	../d1_r3_triple/LRB444_d1_r3/Snap-1017-Image Export-41.tif	4	TRUE	872.701
LRB444	d1	r3	../d1_r3_triple/LRB444_d1_r3/Snap-1017-Image Export-41.tif	6	TRUE	827.87
LRB444	d1	r3	../d1_r3_triple/LRB444_d1_r3/Snap-1017-Image Export-41.tif	7	TRUE	798.667
LRB444	d1	r3	../d1_r3_triple/LRB444_d1_r3/Snap-1018-Image Export-42.tif	0	TRUE	852.783
LRB444	d1	r3	../d1_r3_triple/LRB444_d1_r3/Snap-1018-Image Export-42.tif	1	TRUE	827.334
LRB444	d1	r3	../d1_r3_triple/LRB444_d1_r3/Snap-1018-Image Export-42.tif	3	TRUE	831.31
LRB444	d1	r3	../d1_r3_triple/LRB444_d1_r3/Snap-1018-Image Export-42.tif	4	TRUE	884.262
LRB444	d1	r3	../d1_r3_triple/LRB444_d1_r3/Snap-1010-Image Export-34.tif	0	TRUE	860.957
LRB444	d1	r3	../d1_r3_triple/LRB444_d1_r3/Snap-1010-Image Export-34.tif	1	TRUE	903.199
LRB444	d1	r3	../d1_r3_triple/LRB444_d1_r3/Snap-1010-Image Export-34.tif	2	TRUE	862.566
LRB444	d1	r3	../d1_r3_triple/LRB444_d1_r3/Snap-1011-Image Export-35.tif	0	TRUE	865.692
LRB444	d1	r3	../d1_r3_triple/LRB444_d1_r3/Snap-1011-Image Export-35.tif	1	TRUE	905.068
LRB444	d1	r3	../d1_r3_triple/LRB444_d1_r3/Snap-1011-Image Export-35.tif	2	TRUE	866.338
LRB444	d1	r3	../d1_r3_triple/LRB444_d1_r3/Snap-1036-Image Export-60.tif	0	TRUE	833.23
LRB444	d1	r3	../d1_r3_triple/LRB444_d1_r3/Snap-1036-Image Export-60.tif	1	TRUE	752.097
LRB444	d1	r3	../d1_r3_triple/LRB444_d1_r3/Snap-1036-Image Export-60.tif	2	TRUE	844.349
LRB444	d1	r3	../d1_r3_triple/LRB444_d1_r3/Snap-1036-Image Export-60.tif	3	TRUE	865.914
LRB444	d1	r3	../d1_r3_triple/LRB444_d1_r3/Snap-1036-Image Export-60.tif	4	TRUE	828.184
LRB444	d1	r3	../d1_r3_triple/LRB444_d1_r3/Snap-1012-Image Export-36.tif	0	TRUE	814.295
LRB444	d1	r3	../d1_r3_triple/LRB444_d1_r3/Snap-1012-Image Export-36.tif	1	TRUE	834.566
LRB444	d1	r3	../d1_r3_triple/LRB444_d1_r3/Snap-1037-Image Export-61.tif	0	TRUE	898.779
LRB444	d1	r3	../d1_r3_triple/LRB444_d1_r3/Snap-1037-Image Export-61.tif	2	TRUE	857.203
LRB444	d1	r3	../d1_r3_triple/LRB444_d1_r3/Snap-1013-Image Export-37.tif	0	TRUE	845.367
LRB444	d1	r3	../d1_r3_triple/LRB444_d1_r3/Snap-1013-Image Export-37.tif	1	TRUE	884.17
LRB444	d1	r3	../d1_r3_triple/LRB444_d1_r3/Snap-1034-Image Export-58.tif	0	TRUE	866.044
LRB444	d1	r3	../d1_r3_triple/LRB444_d1_r3/Snap-1034-Image Export-58.tif	1	TRUE	851.174
LRB444	d1	r3	../d1_r3_triple/LRB444_d1_r3/Snap-1034-Image Export-58.tif	2	TRUE	886.813
LRB444	d1	r3	../d1_r3_triple/LRB444_d1_r3/Snap-1009-Image Export-33.tif	0	TRUE	907.121
LRB444	d1	r3	../d1_r3_triple/LRB444_d1_r3/Snap-1009-Image Export-33.tif	1	TRUE	864.305
LRB444	d1	r3	../d1_r3_triple/LRB444_d1_r3/Snap-1028-Image Export-52.tif	1	TRUE	862.474
LRB444	d1	r3	../d1_r3_triple/LRB444_d1_r3/Snap-1028-Image Export-52.tif	2	TRUE	699.254
LRB444	d1	r3	../d1_r3_triple/LRB444_d1_r3/Snap-1028-Image Export-52.tif	3	TRUE	888.439
LRB444	d1	r3	../d1_r3_triple/LRB444_d1_r3/Snap-1028-Image Export-52.tif	4	TRUE	843.314
LRB444	d1	r3	../d1_r3_triple/LRB444_d1_r3/Snap-1029-Image Export-53.tif	0	TRUE	885.962
LRB444	d1	r3	../d1_r3_triple/LRB444_d1_r3/Snap-1029-Image Export-53.tif	1	TRUE	850.064
LRB444	d1	r3	../d1_r3_triple/LRB444_d1_r3/Snap-1029-Image Export-53.tif	4	TRUE	886.499
LRB444	d1	r3	../d1_r3_triple/LRB444_d1_r3/Snap-1015-Image Export-39.tif	0	TRUE	814.647
LRB444	d1	r3	../d1_r3_triple/LRB444_d1_r3/Snap-1015-Image Export-39.tif	1	TRUE	878.363
LRB444	d1	r3	../d1_r3_triple/LRB444_d1_r3/Snap-1015-Image Export-39.tif	2	TRUE	557.511
LRB444	d1	r3	../d1_r3_triple/LRB444_d1_r3/Snap-1015-Image Export-39.tif	3	TRUE	855.15
LRB444	d1	r3	../d1_r3_triple/LRB444_d1_r3/Snap-1033-Image Export-57.tif	0	TRUE	833.585
LRB444	d1	r3	../d1_r3_triple/LRB444_d1_r3/Snap-1033-Image Export-57.tif	1	TRUE	816.44
LRB444	d1	r3	../d1_r3_triple/LRB444_d1_r3/Snap-1032-Image Export-56.tif	0	TRUE	872.793
LRB444	d1	r3	../d1_r3_triple/LRB444_d1_r3/Snap-1032-Image Export-56.tif	1	TRUE	798.981
LRB444	d1	r3	../d1_r3_triple/LRB444_d1_r3/Snap-1032-Image Export-56.tif	2	TRUE	752.947
LRB444	d1	r3	../d1_r3_triple/LRB444_d1_r3/Snap-1031-Image Export-55.tif	0	TRUE	800.498
LRB444	d1	r3	../d1_r3_triple/LRB444_d1_r3/Snap-1031-Image Export-55.tif	1	TRUE	839.614
LRB444	d1	r3	../d1_r3_triple/LRB444_d1_r3/Snap-1031-Image Export-55.tif	4	TRUE	889.126
LRB444	d1	r3	../d1_r3_triple/LRB444_d1_r3/Snap-1030-Image Export-54.tif	0	TRUE	782.058
LRB444	d1	r3	../d1_r3_triple/LRB444_d1_r3/Snap-1030-Image Export-54.tif	1	TRUE	871.537
LRB444	d1	r3	../d1_r3_triple/LRB444_d1_r3/Snap-1030-Image Export-54.tif	2	TRUE	866.764
LRB444	d1	r3	../d1_r3_triple/LRB444_d1_r3/Snap-1030-Image Export-54.tif	4	TRUE	859.793
LRB444	d1	r3	../d1_r3_triple/LRB444_d1_r3/Snap-1030-Image Export-54.tif	5	TRUE	741.831
LRB444	d1	r3	../d1_r3_triple/LRB444_d1_r3/Snap-1021-Image Export-45.tif	0	TRUE	848.585
LRB444	d1	r3	../d1_r3_triple/LRB444_d1_r3/Snap-1021-Image Export-45.tif	1	TRUE	846.976
LRB444	d1	r3	../d1_r3_triple/LRB444_d1_r3/Snap-1021-Image Export-45.tif	3	TRUE	841.889
LRB444	d1	r3	../d1_r3_triple/LRB444_d1_r3/Snap-1020-Image Export-44.tif	1	TRUE	898.817
LRB444	d1	r3	../d1_r3_triple/LRB444_d1_r3/Snap-1020-Image Export-44.tif	2	TRUE	834.88
LRB444	d1	r3	../d1_r3_triple/LRB444_d1_r3/Snap-1020-Image Export-44.tif	3	TRUE	882.745
LRB444	d1	r3	../d1_r3_triple/LRB444_d1_r3/Snap-1023-Image Export-47.tif	0	TRUE	853.411
LRB444	d1	r3	../d1_r3_triple/LRB444_d1_r3/Snap-1023-Image Export-47.tif	1	TRUE	891.807
LRB444	d1	r3	../d1_r3_triple/LRB444_d1_r3/Snap-1023-Image Export-47.tif	2	TRUE	852.469
LRB444	d1	r3	../d1_r3_triple/LRB444_d1_r3/Snap-1023-Image Export-47.tif	3	TRUE	863.769
LRB444	d1	r3	../d1_r3_triple/LRB444_d1_r3/Snap-1023-Image Export-47.tif	4	TRUE	866.58
LRB444	d1	r3	../d1_r3_triple/LRB444_d1_r3/Snap-1022-Image Export-46.tif	0	TRUE	851.266
LRB444	d1	r3	../d1_r3_triple/LRB444_d1_r3/Snap-1022-Image Export-46.tif	1	TRUE	903.199
LRB444	d1	r3	../d1_r3_triple/LRB444_d1_r3/Snap-1022-Image Export-46.tif	2	TRUE	839.3
LRB444	d1	r3	../d1_r3_triple/LRB444_d1_r3/Snap-1027-Image Export-51.tif	1	TRUE	896.32
LRB444	d1	r3	../d1_r3_triple/LRB444_d1_r3/Snap-1027-Image Export-51.tif	3	TRUE	829.923
LRB444	d1	r3	../d1_r3_triple/LRB444_d1_r3/Snap-1027-Image Export-51.tif	5	TRUE	848.899
LRB444	d1	r3	../d1_r3_triple/LRB444_d1_r3/Snap-1026-Image Export-50.tif	0	TRUE	837.599
LRB444	d1	r3	../d1_r3_triple/LRB444_d1_r3/Snap-1026-Image Export-50.tif	1	TRUE	832.827
LRB444	d1	r3	../d1_r3_triple/LRB444_d1_r3/Snap-1026-Image Export-50.tif	2	TRUE	851.266
LRB456	d1	r3	../d1_r3_triple/LRB456_d1_r3/Snap-1058-Image Export-82.tif	1	TRUE	851.803
LRB456	d1	r3	../d1_r3_triple/LRB456_d1_r3/Snap-1058-Image Export-82.tif	2	TRUE	853.411
LRB456	d1	r3	../d1_r3_triple/LRB456_d1_r3/Snap-1059-Image Export-83.tif	0	TRUE	878.102
LRB456	d1	r3	../d1_r3_triple/LRB456_d1_r3/Snap-1045-Image Export-69.tif	0	TRUE	837.155
LRB456	d1	r3	../d1_r3_triple/LRB456_d1_r3/Snap-1045-Image Export-69.tif	4	TRUE	874.532
LRB456	d1	r3	../d1_r3_triple/LRB456_d1_r3/Snap-1045-Image Export-69.tif	5	TRUE	849.527
LRB456	d1	r3	../d1_r3_triple/LRB456_d1_r3/Snap-1078-Image Export-102.tif	0	TRUE	839.652
LRB456	d1	r3	../d1_r3_triple/LRB456_d1_r3/Snap-1078-Image Export-102.tif	1	TRUE	780.319
LRB456	d1	r3	../d1_r3_triple/LRB456_d1_r3/Snap-1078-Image Export-102.tif	2	TRUE	827.518
LRB456	d1	r3	../d1_r3_triple/LRB456_d1_r3/Snap-1044-Image Export-68.tif	0	TRUE	860.643
LRB456	d1	r3	../d1_r3_triple/LRB456_d1_r3/Snap-1077-Image Export-101.tif	0	TRUE	822.599
LRB456	d1	r3	../d1_r3_triple/LRB456_d1_r3/Snap-1077-Image Export-101.tif	1	TRUE	860.735
LRB456	d1	r3	../d1_r3_triple/LRB456_d1_r3/Snap-1077-Image Export-101.tif	2	TRUE	813.537
LRB456	d1	r3	../d1_r3_triple/LRB456_d1_r3/Snap-1075-Image Export-99.tif	0	TRUE	835.194
LRB456	d1	r3	../d1_r3_triple/LRB456_d1_r3/Snap-1075-Image Export-99.tif	2	TRUE	859.885
LRB456	d1	r3	../d1_r3_triple/LRB456_d1_r3/Snap-1074-Image Export-98.tif	0	TRUE	832.643
LRB456	d1	r3	../d1_r3_triple/LRB456_d1_r3/Snap-1074-Image Export-98.tif	1	TRUE	837.339
LRB456	d1	r3	../d1_r3_triple/LRB456_d1_r3/Snap-1074-Image Export-98.tif	2	TRUE	730.531
LRB456	d1	r3	../d1_r3_triple/LRB456_d1_r3/Snap-1074-Image Export-98.tif	3	TRUE	853.764
LRB456	d1	r3	../d1_r3_triple/LRB456_d1_r3/Snap-1080-Image Export-104.tif	0	TRUE	816.976
LRB456	d1	r3	../d1_r3_triple/LRB456_d1_r3/Snap-1055-Image Export-79.tif	0	TRUE	835.768
LRB456	d1	r3	../d1_r3_triple/LRB456_d1_r3/Snap-1055-Image Export-79.tif	1	TRUE	746.474
LRB456	d1	r3	../d1_r3_triple/LRB456_d1_r3/Snap-1055-Image Export-79.tif	2	TRUE	790.455
LRB456	d1	r3	../d1_r3_triple/LRB456_d1_r3/Snap-1055-Image Export-79.tif	3	TRUE	834.029
LRB456	d1	r3	../d1_r3_triple/LRB456_d1_r3/Snap-1055-Image Export-79.tif	4	TRUE	754.556
LRB456	d1	r3	../d1_r3_triple/LRB456_d1_r3/Snap-1055-Image Export-79.tif	5	TRUE	825.633
LRB456	d1	r3	../d1_r3_triple/LRB456_d1_r3/Snap-1054-Image Export-78.tif	0	TRUE	801.348
LRB456	d1	r3	../d1_r3_triple/LRB456_d1_r3/Snap-1065-Image Export-89.tif	0	TRUE	881.634
LRB456	d1	r3	../d1_r3_triple/LRB456_d1_r3/Snap-1065-Image Export-89.tif	1	TRUE	769.019
LRB456	d1	r3	../d1_r3_triple/LRB456_d1_r3/Snap-1065-Image Export-89.tif	2	TRUE	801.884
LRB456	d1	r3	../d1_r3_triple/LRB456_d1_r3/Snap-1064-Image Export-88.tif	0	TRUE	804.474
LRB456	d1	r3	../d1_r3_triple/LRB456_d1_r3/Snap-1064-Image Export-88.tif	1	TRUE	795.855
LRB456	d1	r3	../d1_r3_triple/LRB456_d1_r3/Snap-1057-Image Export-81.tif	0	TRUE	790.677
LRB456	d1	r3	../d1_r3_triple/LRB456_d1_r3/Snap-1057-Image Export-81.tif	1	TRUE	815.59
LRB456	d1	r3	../d1_r3_triple/LRB456_d1_r3/Snap-1056-Image Export-80.tif	0	TRUE	789.512
LRB456	d1	r3	../d1_r3_triple/LRB456_d1_r3/Snap-1056-Image Export-80.tif	1	TRUE	833.141
LRB456	d1	r3	../d1_r3_triple/LRB456_d1_r3/Snap-1076-Image Export-100.tif	0	TRUE	852.783
LRB456	d1	r3	../d1_r3_triple/LRB456_d1_r3/Snap-1076-Image Export-100.tif	1	TRUE	727.85
LRB456	d1	r3	../d1_r3_triple/LRB456_d1_r3/Snap-1076-Image Export-100.tif	2	TRUE	812.334
LRB456	d1	r3	../d1_r3_triple/LRB456_d1_r3/Snap-1079-Image Export-103.tif	0	TRUE	851.711
LRB456	d1	r3	../d1_r3_triple/LRB456_d1_r3/Snap-1079-Image Export-103.tif	1	TRUE	745.087
LRB456	d1	r3	../d1_r3_triple/LRB456_d1_r3/Snap-1079-Image Export-103.tif	2	TRUE	800.498
LRB456	d1	r3	../d1_r3_triple/LRB456_d1_r3/Snap-1079-Image Export-103.tif	3	TRUE	821.175
LRB456	d1	r3	../d1_r3_triple/LRB456_d1_r3/Snap-1062-Image Export-86.tif	0	TRUE	817.29
LRB456	d1	r3	../d1_r3_triple/LRB456_d1_r3/Snap-1062-Image Export-86.tif	1	TRUE	823.986
LRB456	d1	r3	../d1_r3_triple/LRB456_d1_r3/Snap-1062-Image Export-86.tif	2	TRUE	844.571
LRB456	d1	r3	../d1_r3_triple/LRB456_d1_r3/Snap-1062-Image Export-86.tif	3	TRUE	856.981
LRB456	d1	r3	../d1_r3_triple/LRB456_d1_r3/Snap-1062-Image Export-86.tif	4	TRUE	840.15
LRB456	d1	r3	../d1_r3_triple/LRB456_d1_r3/Snap-1063-Image Export-87.tif	0	TRUE	787.995
LRB456	d1	r3	../d1_r3_triple/LRB456_d1_r3/Snap-1060-Image Export-84.tif	0	TRUE	866.45
LRB456	d1	r3	../d1_r3_triple/LRB456_d1_r3/Snap-1061-Image Export-85.tif	0	TRUE	714.237
LRB456	d1	r3	../d1_r3_triple/LRB456_d1_r3/Snap-1061-Image Export-85.tif	1	TRUE	776.343
LRB456	d1	r3	../d1_r3_triple/LRB456_d1_r3/Snap-1061-Image Export-85.tif	2	TRUE	806.435
LRB456	d1	r3	../d1_r3_triple/LRB456_d1_r3/Snap-1050-Image Export-74.tif	0	TRUE	791.435
LRB456	d1	r3	../d1_r3_triple/LRB456_d1_r3/Snap-1050-Image Export-74.tif	1	TRUE	848.899
LRB456	d1	r3	../d1_r3_triple/LRB456_d1_r3/Snap-1050-Image Export-74.tif	2	TRUE	816.348
LRB456	d1	r3	../d1_r3_triple/LRB456_d1_r3/Snap-1051-Image Export-75.tif	0	TRUE	740.314
LRB456	d1	r3	../d1_r3_triple/LRB456_d1_r3/Snap-1051-Image Export-75.tif	1	TRUE	823.005
LRB456	d1	r3	../d1_r3_triple/LRB456_d1_r3/Snap-1051-Image Export-75.tif	2	TRUE	851.933
LRB456	d1	r3	../d1_r3_triple/LRB456_d1_r3/Snap-1051-Image Export-75.tif	3	TRUE	885.518
LRB456	d1	r3	../d1_r3_triple/LRB456_d1_r3/Snap-1051-Image Export-75.tif	4	TRUE	791.657
LRB456	d1	r3	../d1_r3_triple/LRB456_d1_r3/Snap-1052-Image Export-76.tif	0	TRUE	838.764
LRB456	d1	r3	../d1_r3_triple/LRB456_d1_r3/Snap-1052-Image Export-76.tif	1	TRUE	817.383
LRB456	d1	r3	../d1_r3_triple/LRB456_d1_r3/Snap-1052-Image Export-76.tif	2	TRUE	845.681
LRB456	d1	r3	../d1_r3_triple/LRB456_d1_r3/Snap-1052-Image Export-76.tif	3	TRUE	819.918
LRB456	d1	r3	../d1_r3_triple/LRB456_d1_r3/Snap-1052-Image Export-76.tif	4	TRUE	801.7
LRB456	d1	r3	../d1_r3_triple/LRB456_d1_r3/Snap-1052-Image Export-76.tif	5	TRUE	761.473
LRB456	d1	r3	../d1_r3_triple/LRB456_d1_r3/Snap-1053-Image Export-77.tif	0	TRUE	842.778
LRB456	d1	r3	../d1_r3_triple/LRB456_d1_r3/Snap-1066-Image Export-90.tif	0	TRUE	771.609
LRB456	d1	r3	../d1_r3_triple/LRB456_d1_r3/Snap-1066-Image Export-90.tif	1	TRUE	776.565
LRB456	d1	r3	../d1_r3_triple/LRB456_d1_r3/Snap-1066-Image Export-90.tif	2	TRUE	726.831
LRB456	d1	r3	../d1_r3_triple/LRB456_d1_r3/Snap-1066-Image Export-90.tif	5	TRUE	862.474
LRB456	d1	r3	../d1_r3_triple/LRB456_d1_r3/Snap-1066-Image Export-90.tif	6	TRUE	783.131
LRB456	d1	r3	../d1_r3_triple/LRB456_d1_r3/Snap-1067-Image Export-91.tif	0	TRUE	782.058
LRB456	d1	r3	../d1_r3_triple/LRB456_d1_r3/Snap-1067-Image Export-91.tif	1	TRUE	833.807
LRB456	d1	r3	../d1_r3_triple/LRB456_d1_r3/Snap-1067-Image Export-91.tif	2	TRUE	819.252
LRB456	d1	r3	../d1_r3_triple/LRB456_d1_r3/Snap-1067-Image Export-91.tif	3	TRUE	738.797
LRB456	d1	r3	../d1_r3_triple/LRB456_d1_r3/Snap-1067-Image Export-91.tif	4	TRUE	729.681
LRB456	d1	r3	../d1_r3_triple/LRB456_d1_r3/Snap-1049-Image Export-73.tif	0	TRUE	730.753
LRB456	d1	r3	../d1_r3_triple/LRB456_d1_r3/Snap-1049-Image Export-73.tif	1	TRUE	844.257
LRB456	d1	r3	../d1_r3_triple/LRB456_d1_r3/Snap-1049-Image Export-73.tif	2	TRUE	790.769
LRB456	d1	r3	../d1_r3_triple/LRB456_d1_r3/Snap-1049-Image Export-73.tif	3	TRUE	816.218
LRB456	d1	r3	../d1_r3_triple/LRB456_d1_r3/Snap-1049-Image Export-73.tif	4	TRUE	625.869
LRB456	d1	r3	../d1_r3_triple/LRB456_d1_r3/Snap-1048-Image Export-72.tif	1	TRUE	820.768
LRB456	d1	r3	../d1_r3_triple/LRB456_d1_r3/Snap-1048-Image Export-72.tif	2	TRUE	814.295
LRB456	d1	r3	../d1_r3_triple/LRB456_d1_r3/Snap-1048-Image Export-72.tif	3	TRUE	834.527
LRB456	d1	r3	../d1_r3_triple/LRB456_d1_r3/Snap-1048-Image Export-72.tif	4	TRUE	833.493
LRB456	d1	r3	../d1_r3_triple/LRB456_d1_r3/Snap-1048-Image Export-72.tif	5	TRUE	894.359
LRB456	d1	r3	../d1_r3_triple/LRB456_d1_r3/Snap-1046-Image Export-70.tif	0	TRUE	806.565
LRB456	d1	r3	../d1_r3_triple/LRB456_d1_r3/Snap-1046-Image Export-70.tif	3	TRUE	778.802
LRB456	d1	r3	../d1_r3_triple/LRB456_d1_r3/Snap-1047-Image Export-71.tif	0	TRUE	866.802
LRB456	d1	r3	../d1_r3_triple/LRB456_d1_r3/Snap-1047-Image Export-71.tif	1	TRUE	848.049
LRB456	d1	r3	../d1_r3_triple/LRB456_d1_r3/Snap-1047-Image Export-71.tif	2	TRUE	809.561
LRB456	d1	r3	../d1_r3_triple/LRB456_d1_r3/Snap-1069-Image Export-93.tif	3	TRUE	781.522
LRB456	d1	r3	../d1_r3_triple/LRB456_d1_r3/Snap-1068-Image Export-92.tif	0	TRUE	796.392
LRB456	d1	r3	../d1_r3_triple/LRB456_d1_r3/Snap-1068-Image Export-92.tif	3	TRUE	801.923
LRB456	d1	r3	../d1_r3_triple/LRB456_d1_r3/Snap-1068-Image Export-92.tif	4	TRUE	816.662
LRB456	d1	r3	../d1_r3_triple/LRB456_d1_r3/Snap-1070-Image Export-94.tif	0	TRUE	800.146
LRB456	d1	r3	../d1_r3_triple/LRB456_d1_r3/Snap-1070-Image Export-94.tif	1	TRUE	806.619
LRB456	d1	r3	../d1_r3_triple/LRB456_d1_r3/Snap-1070-Image Export-94.tif	2	TRUE	846.624
LRB456	d1	r3	../d1_r3_triple/LRB456_d1_r3/Snap-1071-Image Export-95.tif	0	TRUE	747.86
LRB456	d1	r3	../d1_r3_triple/LRB456_d1_r3/Snap-1071-Image Export-95.tif	2	TRUE	840.058
LRB456	d1	r3	../d1_r3_triple/LRB456_d1_r3/Snap-1082-Image Export-106.tif	0	TRUE	832.512
LRB456	d1	r3	../d1_r3_triple/LRB456_d1_r3/Snap-1082-Image Export-106.tif	1	TRUE	861.808
LRB456	d1	r3	../d1_r3_triple/LRB456_d1_r3/Snap-1082-Image Export-106.tif	4	TRUE	834.121
LRB456	d1	r3	../d1_r3_triple/LRB456_d1_r3/Snap-1082-Image Export-106.tif	5	TRUE	797.778
LRB456	d1	r3	../d1_r3_triple/LRB456_d1_r3/Snap-1082-Image Export-106.tif	6	TRUE	802.421
LRB456	d1	r3	../d1_r3_triple/LRB456_d1_r3/Snap-1042-Image Export-66.tif	2	TRUE	867.561
LRB456	d1	r3	../d1_r3_triple/LRB456_d1_r3/Snap-1042-Image Export-66.tif	3	TRUE	849.213
LRB456	d1	r3	../d1_r3_triple/LRB456_d1_r3/Snap-1042-Image Export-66.tif	4	TRUE	869.706
LRB456	d1	r3	../d1_r3_triple/LRB456_d1_r3/Snap-1042-Image Export-66.tif	5	TRUE	839.928
LRB456	d1	r3	../d1_r3_triple/LRB456_d1_r3/Snap-1040-Image Export-64.tif	0	TRUE	772.681
LRB456	d1	r3	../d1_r3_triple/LRB456_d1_r3/Snap-1041-Image Export-65.tif	0	TRUE	843.498
LRB456	d1	r3	../d1_r3_triple/LRB456_d1_r3/Snap-1041-Image Export-65.tif	1	TRUE	802.827
N2	d1	r3	../d1_r3_triple/N2_d1_r3/Snap-955-Image Export-123.tif	0	TRUE	861.049
N2	d1	r3	../d1_r3_triple/N2_d1_r3/Snap-955-Image Export-123.tif	2	TRUE	864.121
N2	d1	r3	../d1_r3_triple/N2_d1_r3/Snap-955-Image Export-123.tif	4	TRUE	873.812
N2	d1	r3	../d1_r3_triple/N2_d1_r3/Snap-968-Image Export-136.tif	0	TRUE	815.59
N2	d1	r3	../d1_r3_triple/N2_d1_r3/Snap-968-Image Export-136.tif	2	TRUE	894.489
N2	d1	r3	../d1_r3_triple/N2_d1_r3/Snap-968-Image Export-136.tif	3	TRUE	867.745
N2	d1	r3	../d1_r3_triple/N2_d1_r3/Snap-968-Image Export-136.tif	4	TRUE	899.668
N2	d1	r3	../d1_r3_triple/N2_d1_r3/Snap-968-Image Export-136.tif	5	TRUE	987.721
N2	d1	r3	../d1_r3_triple/N2_d1_r3/Snap-968-Image Export-136.tif	6	TRUE	875.291
N2	d1	r3	../d1_r3_triple/N2_d1_r3/Snap-968-Image Export-136.tif	7	TRUE	874.31
N2	d1	r3	../d1_r3_triple/N2_d1_r3/Snap-967-Image Export-135.tif	0	TRUE	859.348
N2	d1	r3	../d1_r3_triple/N2_d1_r3/Snap-967-Image Export-135.tif	2	TRUE	869.484
N2	d1	r3	../d1_r3_triple/N2_d1_r3/Snap-967-Image Export-135.tif	3	TRUE	866.802
N2	d1	r3	../d1_r3_triple/N2_d1_r3/Snap-967-Image Export-135.tif	5	TRUE	827.112
N2	d1	r3	../d1_r3_triple/N2_d1_r3/Snap-950-Image Export-118.tif	2	TRUE	865.155
N2	d1	r3	../d1_r3_triple/N2_d1_r3/Snap-950-Image Export-118.tif	3	TRUE	836.711
N2	d1	r3	../d1_r3_triple/N2_d1_r3/Snap-950-Image Export-118.tif	8	TRUE	887.073
N2	d1	r3	../d1_r3_triple/N2_d1_r3/Snap-950-Image Export-118.tif	9	TRUE	871.851
N2	d1	r3	../d1_r3_triple/N2_d1_r3/Snap-974-Image Export-142.tif	2	TRUE	779.691
N2	d1	r3	../d1_r3_triple/N2_d1_r3/Snap-974-Image Export-142.tif	3	TRUE	824.967
N2	d1	r3	../d1_r3_triple/N2_d1_r3/Snap-974-Image Export-142.tif	4	TRUE	841.131
N2	d1	r3	../d1_r3_triple/N2_d1_r3/Snap-974-Image Export-142.tif	5	TRUE	854.392
N2	d1	r3	../d1_r3_triple/N2_d1_r3/Snap-974-Image Export-142.tif	6	TRUE	867.339
N2	d1	r3	../d1_r3_triple/N2_d1_r3/Snap-974-Image Export-142.tif	7	TRUE	863.233
N2	d1	r3	../d1_r3_triple/N2_d1_r3/Snap-962-Image Export-130.tif	0	TRUE	849.305
N2	d1	r3	../d1_r3_triple/N2_d1_r3/Snap-962-Image Export-130.tif	2	TRUE	901.276
N2	d1	r3	../d1_r3_triple/N2_d1_r3/Snap-962-Image Export-130.tif	3	TRUE	793.488
N2	d1	r3	../d1_r3_triple/N2_d1_r3/Snap-961-Image Export-129.tif	0	TRUE	877.88
N2	d1	r3	../d1_r3_triple/N2_d1_r3/Snap-961-Image Export-129.tif	1	TRUE	898.021
N2	d1	r3	../d1_r3_triple/N2_d1_r3/Snap-944-Image Export-112.tif	0	TRUE	856.223
N2	d1	r3	../d1_r3_triple/N2_d1_r3/Snap-966-Image Export-134.tif	0	TRUE	853.856
N2	d1	r3	../d1_r3_triple/N2_d1_r3/Snap-966-Image Export-134.tif	1	TRUE	807.285
N2	d1	r3	../d1_r3_triple/N2_d1_r3/Snap-966-Image Export-134.tif	2	TRUE	869.392
N2	d1	r3	../d1_r3_triple/N2_d1_r3/Snap-966-Image Export-134.tif	4	TRUE	873.774
N2	d1	r3	../d1_r3_triple/N2_d1_r3/Snap-969-Image Export-137.tif	1	TRUE	886.629
N2	d1	r3	../d1_r3_triple/N2_d1_r3/Snap-969-Image Export-137.tif	2	TRUE	902.035
N2	d1	r3	../d1_r3_triple/N2_d1_r3/Snap-969-Image Export-137.tif	7	TRUE	845.865
N2	d1	r3	../d1_r3_triple/N2_d1_r3/Snap-969-Image Export-137.tif	9	TRUE	873.904
N2	d1	r3	../d1_r3_triple/N2_d1_r3/Snap-969-Image Export-137.tif	10	TRUE	843.812
N2	d1	r3	../d1_r3_triple/N2_d1_r3/Snap-954-Image Export-122.tif	1	TRUE	803.938
N2	d1	r3	../d1_r3_triple/N2_d1_r3/Snap-954-Image Export-122.tif	4	TRUE	784.87
N2	d1	r3	../d1_r3_triple/N2_d1_r3/Snap-954-Image Export-122.tif	5	TRUE	869.484
N2	d1	r3	../d1_r3_triple/N2_d1_r3/Snap-945-Image Export-113.tif	1	TRUE	763.657
N2	d1	r3	../d1_r3_triple/N2_d1_r3/Snap-945-Image Export-113.tif	2	TRUE	842.204
N2	d1	r3	../d1_r3_triple/N2_d1_r3/Snap-945-Image Export-113.tif	3	TRUE	832.919
N2	d1	r3	../d1_r3_triple/N2_d1_r3/Snap-963-Image Export-131.tif	0	TRUE	883.725
N2	d1	r3	../d1_r3_triple/N2_d1_r3/Snap-939-Image Export-107.tif	0	TRUE	901.683
N2	d1	r3	../d1_r3_triple/N2_d1_r3/Snap-960-Image Export-128.tif	0	TRUE	851.933
N2	d1	r3	../d1_r3_triple/N2_d1_r3/Snap-960-Image Export-128.tif	2	TRUE	862.03
N2	d1	r3	../d1_r3_triple/N2_d1_r3/Snap-951-Image Export-119.tif	0	TRUE	855.556
N2	d1	r3	../d1_r3_triple/N2_d1_r3/Snap-951-Image Export-119.tif	1	TRUE	901.943
N2	d1	r3	../d1_r3_triple/N2_d1_r3/Snap-951-Image Export-119.tif	2	TRUE	875.199
N2	d1	r3	../d1_r3_triple/N2_d1_r3/Snap-951-Image Export-119.tif	3	TRUE	818.271
N2	d1	r3	../d1_r3_triple/N2_d1_r3/Snap-975-Image Export-143.tif	1	TRUE	879.489
N2	d1	r3	../d1_r3_triple/N2_d1_r3/Snap-975-Image Export-143.tif	2	TRUE	868.817
N2	d1	r3	../d1_r3_triple/N2_d1_r3/Snap-975-Image Export-143.tif	3	TRUE	857.924
N2	d1	r3	../d1_r3_triple/N2_d1_r3/Snap-975-Image Export-143.tif	4	TRUE	869.89
N2	d1	r3	../d1_r3_triple/N2_d1_r3/Snap-965-Image Export-133.tif	1	TRUE	858.904
N2	d1	r3	../d1_r3_triple/N2_d1_r3/Snap-965-Image Export-133.tif	2	TRUE	770.092
N2	d1	r3	../d1_r3_triple/N2_d1_r3/Snap-965-Image Export-133.tif	3	TRUE	826.131
N2	d1	r3	../d1_r3_triple/N2_d1_r3/Snap-965-Image Export-133.tif	4	TRUE	868.705
N2	d1	r3	../d1_r3_triple/N2_d1_r3/Snap-965-Image Export-133.tif	5	TRUE	869.04
N2	d1	r3	../d1_r3_triple/N2_d1_r3/Snap-965-Image Export-133.tif	6	TRUE	811.706
N2	d1	r3	../d1_r3_triple/N2_d1_r3/Snap-958-Image Export-126.tif	0	TRUE	840.15
N2	d1	r3	../d1_r3_triple/N2_d1_r3/Snap-958-Image Export-126.tif	1	TRUE	847.252
N2	d1	r3	../d1_r3_triple/N2_d1_r3/Snap-958-Image Export-126.tif	2	TRUE	862.788
N2	d1	r3	../d1_r3_triple/N2_d1_r3/Snap-958-Image Export-126.tif	3	TRUE	800.59
N2	d1	r3	../d1_r3_triple/N2_d1_r3/Snap-958-Image Export-126.tif	4	TRUE	766.43
N2	d1	r3	../d1_r3_triple/N2_d1_r3/Snap-958-Image Export-126.tif	6	TRUE	894.987
N2	d1	r3	../d1_r3_triple/N2_d1_r3/Snap-957-Image Export-125.tif	0	TRUE	877.604
N2	d1	r3	../d1_r3_triple/N2_d1_r3/Snap-957-Image Export-125.tif	1	TRUE	855.909
N2	d1	r3	../d1_r3_triple/N2_d1_r3/Snap-943-Image Export-111.tif	1	TRUE	861.402
N2	d1	r3	../d1_r3_triple/N2_d1_r3/Snap-973-Image Export-141.tif	1	TRUE	865.784
N2	d1	r3	../d1_r3_triple/N2_d1_r3/Snap-973-Image Export-141.tif	2	TRUE	820.232
N2	d1	r3	../d1_r3_triple/N2_d1_r3/Snap-973-Image Export-141.tif	3	TRUE	861.179
N2	d1	r3	../d1_r3_triple/N2_d1_r3/Snap-973-Image Export-141.tif	4	TRUE	842.296
N2	d1	r3	../d1_r3_triple/N2_d1_r3/Snap-971-Image Export-139.tif	2	TRUE	858.368
N2	d1	r3	../d1_r3_triple/N2_d1_r3/Snap-971-Image Export-139.tif	4	TRUE	930.388
N2	d1	r3	../d1_r3_triple/N2_d1_r3/Snap-976-Image Export-144.tif	1	TRUE	866.894
N2	d1	r3	../d1_r3_triple/N2_d1_r3/Snap-976-Image Export-144.tif	2	TRUE	841.223
N2	d1	r3	../d1_r3_triple/N2_d1_r3/Snap-976-Image Export-144.tif	4	TRUE	875.513
N2	d1	r3	../d1_r3_triple/N2_d1_r3/Snap-946-Image Export-114.tif	0	TRUE	853.764
N2	d1	r3	../d1_r3_triple/N2_d1_r3/Snap-946-Image Export-114.tif	1	TRUE	838.227
N2	d1	r3	../d1_r3_triple/N2_d1_r3/Snap-946-Image Export-114.tif	2	TRUE	901.629
N2	d1	r3	../d1_r3_triple/N2_d1_r3/Snap-946-Image Export-114.tif	3	TRUE	847.919
N2	d1	r3	../d1_r3_triple/N2_d1_r3/Snap-946-Image Export-114.tif	4	TRUE	846.938
N2	d1	r3	../d1_r3_triple/N2_d1_r3/Snap-949-Image Export-117.tif	0	TRUE	914.721
N2	d1	r3	../d1_r3_triple/N2_d1_r3/Snap-949-Image Export-117.tif	1	TRUE	851.987
N2	d1	r3	../d1_r3_triple/N2_d1_r3/Snap-949-Image Export-117.tif	2	TRUE	867.247
N2	d1	r3	../d1_r3_triple/N2_d1_r3/Snap-949-Image Export-117.tif	3	TRUE	830.053
N2	d1	r3	../d1_r3_triple/N2_d1_r3/Snap-949-Image Export-117.tif	4	TRUE	883.909
N2	d1	r3	../d1_r3_triple/N2_d1_r3/Snap-949-Image Export-117.tif	5	TRUE	840.909
N2	d1	r3	../d1_r3_triple/N2_d1_r3/Snap-970-Image Export-138.tif	3	TRUE	869.668
N2	d1	r3	../d1_r3_triple/N2_d1_r3/Snap-970-Image Export-138.tif	4	TRUE	843.184
N2	d1	r3	../d1_r3_triple/N2_d1_r3/Snap-972-Image Export-140.tif	3	TRUE	913.557
N2	d1	r3	../d1_r3_triple/N2_d1_r3/Snap-972-Image Export-140.tif	4	TRUE	865.194
N2	d1	r3	../d1_r3_triple/N2_d1_r3/Snap-972-Image Export-140.tif	8	TRUE	839.836
N2	d1	r3	../d1_r3_triple/N2_d1_r3/Snap-972-Image Export-140.tif	11	TRUE	834.88
N2	d1	r3	../d1_r3_triple/N2_d1_r3/Snap-956-Image Export-124.tif	1	TRUE	878.508
N2	d1	r3	../d1_r3_triple/N2_d1_r3/Snap-956-Image Export-124.tif	2	TRUE	853.986
N2	d1	r3	../d1_r3_triple/N2_d1_r3/Snap-956-Image Export-124.tif	3	TRUE	715.792
N2	d1	r3	../d1_r3_triple/N2_d1_r3/Snap-956-Image Export-124.tif	4	TRUE	871.981
N2	d1	r3	../d1_r3_triple/N2_d1_r3/Snap-956-Image Export-124.tif	8	TRUE	853.726
N2	d1	r3	../d1_r3_triple/N2_d1_r3/Snap-941-Image Export-109.tif	0	TRUE	821.305
N2	d1	r3	../d1_r3_triple/N2_d1_r3/Snap-959-Image Export-127.tif	1	TRUE	776.565
N2	d1	r3	../d1_r3_triple/N2_d1_r3/Snap-959-Image Export-127.tif	3	TRUE	814.035
N2	d1	r3	../d1_r3_triple/N2_d1_r3/Snap-964-Image Export-132.tif	0	TRUE	863.769
N2	d1	r3	../d1_r3_triple/N2_d1_r3/Snap-964-Image Export-132.tif	1	TRUE	805.102
N2	d1	r3	../d1_r3_triple/N2_d1_r3/Snap-964-Image Export-132.tif	2	TRUE	843.276
N2	d1	r3	../d1_r3_triple/N2_d1_r3/Snap-953-Image Export-121.tif	1	TRUE	844.571
N2	d1	r3	../d1_r3_triple/N2_d1_r3/Snap-953-Image Export-121.tif	2	TRUE	835.194
N2	d1	r3	../d1_r3_triple/N2_d1_r3/Snap-953-Image Export-121.tif	3	TRUE	756.517
N2	d1	r3	../d1_r3_triple/N2_d1_r3/Snap-953-Image Export-121.tif	8	TRUE	757.812
N2	d1	r3	../d1_r3_triple/N2_d1_r3/Snap-947-Image Export-115.tif	0	TRUE	862.696
N2	d1	r3	../d1_r3_triple/N2_d1_r3/Snap-947-Image Export-115.tif	1	TRUE	840.779
N2	d1	r3	../d1_r3_triple/N2_d1_r3/Snap-947-Image Export-115.tif	2	TRUE	875.107
N2	d1	r3	../d1_r3_triple/N2_d1_r3/Snap-947-Image Export-115.tif	3	TRUE	858.996
CF1038	d1	r4	../d1_r4_triple/CF1038_d1_r4/Snap-1133-Image Export-09.tif	0	TRUE	720.304
CF1038	d1	r4	../d1_r4_triple/CF1038_d1_r4/Snap-1132-Image Export-08.tif	0	TRUE	737.985
CF1038	d1	r4	../d1_r4_triple/CF1038_d1_r4/Snap-1131-Image Export-07.tif	0	TRUE	727.72
CF1038	d1	r4	../d1_r4_triple/CF1038_d1_r4/Snap-1130-Image Export-06.tif	0	TRUE	804.382
CF1038	d1	r4	../d1_r4_triple/CF1038_d1_r4/Snap-1129-Image Export-05.tif	0	TRUE	809.875
CF1038	d1	r4	../d1_r4_triple/CF1038_d1_r4/Snap-1149-Image Export-25.tif	0	TRUE	763.619
CF1038	d1	r4	../d1_r4_triple/CF1038_d1_r4/Snap-1135-Image Export-11.tif	1	TRUE	819.566
CF1038	d1	r4	../d1_r4_triple/CF1038_d1_r4/Snap-1135-Image Export-11.tif	2	TRUE	772.995
CF1038	d1	r4	../d1_r4_triple/CF1038_d1_r4/Snap-1143-Image Export-19.tif	0	TRUE	701.956
CF1038	d1	r4	../d1_r4_triple/CF1038_d1_r4/Snap-1144-Image Export-20.tif	0	TRUE	829.831
CF1038	d1	r4	../d1_r4_triple/CF1038_d1_r4/Snap-1145-Image Export-21.tif	0	TRUE	715.662
CF1038	d1	r4	../d1_r4_triple/CF1038_d1_r4/Snap-1142-Image Export-18.tif	0	TRUE	722.357
CF1038	d1	r4	../d1_r4_triple/CF1038_d1_r4/Snap-1147-Image Export-23.tif	0	TRUE	652.168
CF1038	d1	r4	../d1_r4_triple/CF1038_d1_r4/Snap-1138-Image Export-14.tif	2	TRUE	784.425
LRB444	d1	r4	../d1_r4_triple/LRB444_d1_r4/Snap-1167-Image Export-43.tif	0	TRUE	762.86
LRB444	d1	r4	../d1_r4_triple/LRB444_d1_r4/Snap-1167-Image Export-43.tif	1	TRUE	874.885
LRB444	d1	r4	../d1_r4_triple/LRB444_d1_r4/Snap-1179-Image Export-55.tif	0	TRUE	813.222
LRB444	d1	r4	../d1_r4_triple/LRB444_d1_r4/Snap-1171-Image Export-47.tif	0	TRUE	714.811
LRB444	d1	r4	../d1_r4_triple/LRB444_d1_r4/Snap-1169-Image Export-45.tif	0	TRUE	779.117
LRB444	d1	r4	../d1_r4_triple/LRB444_d1_r4/Snap-1168-Image Export-44.tif	0	TRUE	744.643
LRB444	d1	r4	../d1_r4_triple/LRB444_d1_r4/Snap-1181-Image Export-57.tif	0	TRUE	776.657
LRB444	d1	r4	../d1_r4_triple/LRB444_d1_r4/Snap-1180-Image Export-56.tif	0	TRUE	671.681
LRB444	d1	r4	../d1_r4_triple/LRB444_d1_r4/Snap-1175-Image Export-51.tif	0	TRUE	812.778
LRB444	d1	r4	../d1_r4_triple/LRB444_d1_r4/Snap-1174-Image Export-50.tif	0	TRUE	669.313
LRB444	d1	r4	../d1_r4_triple/LRB444_d1_r4/Snap-1161-Image Export-37.tif	0	TRUE	707.135
LRB444	d1	r4	../d1_r4_triple/LRB444_d1_r4/Snap-1177-Image Export-53.tif	0	TRUE	833.049
LRB444	d1	r4	../d1_r4_triple/LRB444_d1_r4/Snap-1160-Image Export-36.tif	0	TRUE	770.536
LRB444	d1	r4	../d1_r4_triple/LRB444_d1_r4/Snap-1176-Image Export-52.tif	0	TRUE	809.116
LRB444	d1	r4	../d1_r4_triple/LRB444_d1_r4/Snap-1156-Image Export-32.tif	0	TRUE	698.294
LRB444	d1	r4	../d1_r4_triple/LRB444_d1_r4/Snap-1162-Image Export-38.tif	0	TRUE	773.532
LRB444	d1	r4	../d1_r4_triple/LRB444_d1_r4/Snap-1162-Image Export-38.tif	1	TRUE	743.348
LRB444	d1	r4	../d1_r4_triple/LRB444_d1_r4/Snap-1157-Image Export-33.tif	0	TRUE	809.967
LRB444	d1	r4	../d1_r4_triple/LRB444_d1_r4/Snap-1155-Image Export-31.tif	0	TRUE	805.618
LRB444	d1	r4	../d1_r4_triple/LRB444_d1_r4/Snap-1155-Image Export-31.tif	1	TRUE	836.174
LRB444	d1	r4	../d1_r4_triple/LRB444_d1_r4/Snap-1184-Image Export-60.tif	0	TRUE	796.43
LRB444	d1	r4	../d1_r4_triple/LRB444_d1_r4/Snap-1183-Image Export-59.tif	0	TRUE	669.85
LRB444	d1	r4	../d1_r4_triple/LRB444_d1_r4/Snap-1182-Image Export-58.tif	0	TRUE	795.319
LRB444	d1	r4	../d1_r4_triple/LRB444_d1_r4/Snap-1172-Image Export-48.tif	0	TRUE	757.812
LRB444	d1	r4	../d1_r4_triple/LRB444_d1_r4/Snap-1172-Image Export-48.tif	1	TRUE	809.653
LRB456	d1	r4	../d1_r4_triple/LRB456_d1_r4/Snap-1208-Image Export-84.tif	0	TRUE	721.376
LRB456	d1	r4	../d1_r4_triple/LRB456_d1_r4/Snap-1208-Image Export-84.tif	1	TRUE	833.271
LRB456	d1	r4	../d1_r4_triple/LRB456_d1_r4/Snap-1208-Image Export-84.tif	2	TRUE	724.502
LRB456	d1	r4	../d1_r4_triple/LRB456_d1_r4/Snap-1209-Image Export-85.tif	0	TRUE	788.217
LRB456	d1	r4	../d1_r4_triple/LRB456_d1_r4/Snap-1209-Image Export-85.tif	1	TRUE	838.266
LRB456	d1	r4	../d1_r4_triple/LRB456_d1_r4/Snap-1209-Image Export-85.tif	2	TRUE	848.455
LRB456	d1	r4	../d1_r4_triple/LRB456_d1_r4/Snap-1209-Image Export-85.tif	3	TRUE	725.759
LRB456	d1	r4	../d1_r4_triple/LRB456_d1_r4/Snap-1209-Image Export-85.tif	4	TRUE	700.57
LRB456	d1	r4	../d1_r4_triple/LRB456_d1_r4/Snap-1210-Image Export-86.tif	0	TRUE	806.527
LRB456	d1	r4	../d1_r4_triple/LRB456_d1_r4/Snap-1210-Image Export-86.tif	1	TRUE	777.324
LRB456	d1	r4	../d1_r4_triple/LRB456_d1_r4/Snap-1210-Image Export-86.tif	2	TRUE	815.812
LRB456	d1	r4	../d1_r4_triple/LRB456_d1_r4/Snap-1211-Image Export-87.tif	0	TRUE	827.112
LRB456	d1	r4	../d1_r4_triple/LRB456_d1_r4/Snap-1211-Image Export-87.tif	1	TRUE	831.662
LRB456	d1	r4	../d1_r4_triple/LRB456_d1_r4/Snap-1216-Image Export-92.tif	0	TRUE	717.048
LRB456	d1	r4	../d1_r4_triple/LRB456_d1_r4/Snap-1214-Image Export-90.tif	0	TRUE	841.261
LRB456	d1	r4	../d1_r4_triple/LRB456_d1_r4/Snap-1214-Image Export-90.tif	1	TRUE	725.483
LRB456	d1	r4	../d1_r4_triple/LRB456_d1_r4/Snap-1214-Image Export-90.tif	2	TRUE	865.508
LRB456	d1	r4	../d1_r4_triple/LRB456_d1_r4/Snap-1214-Image Export-90.tif	3	TRUE	838.672
LRB456	d1	r4	../d1_r4_triple/LRB456_d1_r4/Snap-1214-Image Export-90.tif	4	TRUE	808.358
LRB456	d1	r4	../d1_r4_triple/LRB456_d1_r4/Snap-1215-Image Export-91.tif	0	TRUE	838.043
LRB456	d1	r4	../d1_r4_triple/LRB456_d1_r4/Snap-1215-Image Export-91.tif	1	TRUE	820.454
LRB456	d1	r4	../d1_r4_triple/LRB456_d1_r4/Snap-1215-Image Export-91.tif	2	TRUE	742.367
LRB456	d1	r4	../d1_r4_triple/LRB456_d1_r4/Snap-1215-Image Export-91.tif	3	TRUE	722.227
LRB456	d1	r4	../d1_r4_triple/LRB456_d1_r4/Snap-1215-Image Export-91.tif	5	TRUE	803.049
LRB456	d1	r4	../d1_r4_triple/LRB456_d1_r4/Snap-1215-Image Export-91.tif	6	TRUE	866.802
LRB456	d1	r4	../d1_r4_triple/LRB456_d1_r4/Snap-1192-Image Export-68.tif	0	TRUE	700.662
LRB456	d1	r4	../d1_r4_triple/LRB456_d1_r4/Snap-1192-Image Export-68.tif	1	TRUE	889.846
LRB456	d1	r4	../d1_r4_triple/LRB456_d1_r4/Snap-1192-Image Export-68.tif	2	TRUE	796.392
LRB456	d1	r4	../d1_r4_triple/LRB456_d1_r4/Snap-1192-Image Export-68.tif	3	TRUE	738.077
LRB456	d1	r4	../d1_r4_triple/LRB456_d1_r4/Snap-1193-Image Export-69.tif	0	TRUE	905.806
LRB456	d1	r4	../d1_r4_triple/LRB456_d1_r4/Snap-1193-Image Export-69.tif	1	TRUE	728.7
LRB456	d1	r4	../d1_r4_triple/LRB456_d1_r4/Snap-1193-Image Export-69.tif	3	TRUE	806.435
LRB456	d1	r4	../d1_r4_triple/LRB456_d1_r4/Snap-1204-Image Export-80.tif	1	TRUE	840.13
LRB456	d1	r4	../d1_r4_triple/LRB456_d1_r4/Snap-1204-Image Export-80.tif	2	TRUE	807.952
LRB456	d1	r4	../d1_r4_triple/LRB456_d1_r4/Snap-1204-Image Export-80.tif	3	TRUE	810.189
LRB456	d1	r4	../d1_r4_triple/LRB456_d1_r4/Snap-1204-Image Export-80.tif	4	TRUE	775.715
LRB456	d1	r4	../d1_r4_triple/LRB456_d1_r4/Snap-1205-Image Export-81.tif	1	TRUE	718.121
LRB456	d1	r4	../d1_r4_triple/LRB456_d1_r4/Snap-1205-Image Export-81.tif	2	TRUE	847.919
LRB456	d1	r4	../d1_r4_triple/LRB456_d1_r4/Snap-1205-Image Export-81.tif	4	TRUE	724.15
LRB456	d1	r4	../d1_r4_triple/LRB456_d1_r4/Snap-1206-Image Export-82.tif	1	TRUE	720.488
LRB456	d1	r4	../d1_r4_triple/LRB456_d1_r4/Snap-1206-Image Export-82.tif	2	TRUE	757.053
LRB456	d1	r4	../d1_r4_triple/LRB456_d1_r4/Snap-1206-Image Export-82.tif	3	TRUE	794.783
LRB456	d1	r4	../d1_r4_triple/LRB456_d1_r4/Snap-1206-Image Export-82.tif	4	TRUE	850.508
LRB456	d1	r4	../d1_r4_triple/LRB456_d1_r4/Snap-1206-Image Export-82.tif	5	TRUE	812.242
LRB456	d1	r4	../d1_r4_triple/LRB456_d1_r4/Snap-1207-Image Export-83.tif	0	TRUE	722.671
LRB456	d1	r4	../d1_r4_triple/LRB456_d1_r4/Snap-1207-Image Export-83.tif	1	TRUE	861.179
LRB456	d1	r4	../d1_r4_triple/LRB456_d1_r4/Snap-1207-Image Export-83.tif	2	TRUE	821.397
LRB456	d1	r4	../d1_r4_triple/LRB456_d1_r4/Snap-1203-Image Export-79.tif	1	TRUE	866.358
LRB456	d1	r4	../d1_r4_triple/LRB456_d1_r4/Snap-1203-Image Export-79.tif	2	TRUE	764.377
LRB456	d1	r4	../d1_r4_triple/LRB456_d1_r4/Snap-1203-Image Export-79.tif	3	TRUE	874.977
LRB456	d1	r4	../d1_r4_triple/LRB456_d1_r4/Snap-1203-Image Export-79.tif	4	TRUE	799.739
LRB456	d1	r4	../d1_r4_triple/LRB456_d1_r4/Snap-1202-Image Export-78.tif	0	TRUE	858.812
LRB456	d1	r4	../d1_r4_triple/LRB456_d1_r4/Snap-1202-Image Export-78.tif	1	TRUE	772.903
LRB456	d1	r4	../d1_r4_triple/LRB456_d1_r4/Snap-1202-Image Export-78.tif	3	TRUE	726.647
LRB456	d1	r4	../d1_r4_triple/LRB456_d1_r4/Snap-1202-Image Export-78.tif	5	TRUE	733.527
LRB456	d1	r4	../d1_r4_triple/LRB456_d1_r4/Snap-1218-Image Export-94.tif	0	TRUE	815.276
LRB456	d1	r4	../d1_r4_triple/LRB456_d1_r4/Snap-1218-Image Export-94.tif	1	TRUE	780.986
LRB456	d1	r4	../d1_r4_triple/LRB456_d1_r4/Snap-1218-Image Export-94.tif	2	TRUE	775.677
LRB456	d1	r4	../d1_r4_triple/LRB456_d1_r4/Snap-1219-Image Export-95.tif	0	TRUE	684.719
LRB456	d1	r4	../d1_r4_triple/LRB456_d1_r4/Snap-1219-Image Export-95.tif	1	TRUE	759.734
LRB456	d1	r4	../d1_r4_triple/LRB456_d1_r4/Snap-1219-Image Export-95.tif	2	TRUE	728.922
LRB456	d1	r4	../d1_r4_triple/LRB456_d1_r4/Snap-1219-Image Export-95.tif	5	TRUE	811.299
LRB456	d1	r4	../d1_r4_triple/LRB456_d1_r4/Snap-1186-Image Export-62.tif	0	TRUE	874.57
LRB456	d1	r4	../d1_r4_triple/LRB456_d1_r4/Snap-1186-Image Export-62.tif	3	TRUE	831.532
LRB456	d1	r4	../d1_r4_triple/LRB456_d1_r4/Snap-1186-Image Export-62.tif	4	TRUE	763.657
LRB456	d1	r4	../d1_r4_triple/LRB456_d1_r4/Snap-1187-Image Export-63.tif	0	TRUE	732.676
LRB456	d1	r4	../d1_r4_triple/LRB456_d1_r4/Snap-1187-Image Export-63.tif	1	TRUE	800.368
LRB456	d1	r4	../d1_r4_triple/LRB456_d1_r4/Snap-1187-Image Export-63.tif	2	TRUE	763.082
LRB456	d1	r4	../d1_r4_triple/LRB456_d1_r4/Snap-1185-Image Export-61.tif	0	TRUE	792.009
LRB456	d1	r4	../d1_r4_triple/LRB456_d1_r4/Snap-1185-Image Export-61.tif	1	TRUE	835.822
LRB456	d1	r4	../d1_r4_triple/LRB456_d1_r4/Snap-1185-Image Export-61.tif	2	TRUE	870.778
LRB456	d1	r4	../d1_r4_triple/LRB456_d1_r4/Snap-1201-Image Export-77.tif	0	TRUE	834.029
LRB456	d1	r4	../d1_r4_triple/LRB456_d1_r4/Snap-1201-Image Export-77.tif	1	TRUE	700.163
LRB456	d1	r4	../d1_r4_triple/LRB456_d1_r4/Snap-1201-Image Export-77.tif	2	TRUE	827.112
LRB456	d1	r4	../d1_r4_triple/LRB456_d1_r4/Snap-1201-Image Export-77.tif	3	TRUE	788.309
LRB456	d1	r4	../d1_r4_triple/LRB456_d1_r4/Snap-1201-Image Export-77.tif	4	TRUE	771.609
LRB456	d1	r4	../d1_r4_triple/LRB456_d1_r4/Snap-1200-Image Export-76.tif	0	TRUE	755.222
LRB456	d1	r4	../d1_r4_triple/LRB456_d1_r4/Snap-1200-Image Export-76.tif	1	TRUE	727.812
LRB456	d1	r4	../d1_r4_triple/LRB456_d1_r4/Snap-1198-Image Export-74.tif	0	TRUE	820.638
LRB456	d1	r4	../d1_r4_triple/LRB456_d1_r4/Snap-1198-Image Export-74.tif	1	TRUE	829.701
LRB456	d1	r4	../d1_r4_triple/LRB456_d1_r4/Snap-1198-Image Export-74.tif	3	TRUE	804.252
LRB456	d1	r4	../d1_r4_triple/LRB456_d1_r4/Snap-1198-Image Export-74.tif	4	TRUE	828.498
LRB456	d1	r4	../d1_r4_triple/LRB456_d1_r4/Snap-1198-Image Export-74.tif	5	TRUE	800.904
LRB456	d1	r4	../d1_r4_triple/LRB456_d1_r4/Snap-1199-Image Export-75.tif	0	TRUE	862.604
LRB456	d1	r4	../d1_r4_triple/LRB456_d1_r4/Snap-1199-Image Export-75.tif	1	TRUE	801.884
LRB456	d1	r4	../d1_r4_triple/LRB456_d1_r4/Snap-1199-Image Export-75.tif	2	TRUE	836.489
LRB456	d1	r4	../d1_r4_triple/LRB456_d1_r4/Snap-1199-Image Export-75.tif	3	TRUE	740
LRB456	d1	r4	../d1_r4_triple/LRB456_d1_r4/Snap-1199-Image Export-75.tif	4	TRUE	852.209
LRB456	d1	r4	../d1_r4_triple/LRB456_d1_r4/Snap-1199-Image Export-75.tif	5	TRUE	820.638
LRB456	d1	r4	../d1_r4_triple/LRB456_d1_r4/Snap-1199-Image Export-75.tif	6	TRUE	768.261
LRB456	d1	r4	../d1_r4_triple/LRB456_d1_r4/Snap-1190-Image Export-66.tif	0	TRUE	811.299
LRB456	d1	r4	../d1_r4_triple/LRB456_d1_r4/Snap-1191-Image Export-67.tif	0	TRUE	829.073
LRB456	d1	r4	../d1_r4_triple/LRB456_d1_r4/Snap-1191-Image Export-67.tif	1	TRUE	720.71
LRB456	d1	r4	../d1_r4_triple/LRB456_d1_r4/Snap-1189-Image Export-65.tif	0	TRUE	776.657
LRB456	d1	r4	../d1_r4_triple/LRB456_d1_r4/Snap-1189-Image Export-65.tif	1	TRUE	738.613
LRB456	d1	r4	../d1_r4_triple/LRB456_d1_r4/Snap-1212-Image Export-88.tif	0	TRUE	760.807
LRB456	d1	r4	../d1_r4_triple/LRB456_d1_r4/Snap-1212-Image Export-88.tif	1	TRUE	724.908
LRB456	d1	r4	../d1_r4_triple/LRB456_d1_r4/Snap-1212-Image Export-88.tif	3	TRUE	651.318
LRB456	d1	r4	../d1_r4_triple/LRB456_d1_r4/Snap-1212-Image Export-88.tif	4	TRUE	824.208
LRB456	d1	r4	../d1_r4_triple/LRB456_d1_r4/Snap-1213-Image Export-89.tif	0	TRUE	790.01
LRB456	d1	r4	../d1_r4_triple/LRB456_d1_r4/Snap-1213-Image Export-89.tif	1	TRUE	736.338
LRB456	d1	r4	../d1_r4_triple/LRB456_d1_r4/Snap-1213-Image Export-89.tif	2	TRUE	772.995
LRB456	d1	r4	../d1_r4_triple/LRB456_d1_r4/Snap-1194-Image Export-70.tif	0	TRUE	722.005
LRB456	d1	r4	../d1_r4_triple/LRB456_d1_r4/Snap-1194-Image Export-70.tif	1	TRUE	792.193
LRB456	d1	r4	../d1_r4_triple/LRB456_d1_r4/Snap-1195-Image Export-71.tif	1	TRUE	787.865
LRB456	d1	r4	../d1_r4_triple/LRB456_d1_r4/Snap-1195-Image Export-71.tif	3	TRUE	833.141
LRB456	d1	r4	../d1_r4_triple/LRB456_d1_r4/Snap-1195-Image Export-71.tif	4	TRUE	869.928
LRB456	d1	r4	../d1_r4_triple/LRB456_d1_r4/Snap-1195-Image Export-71.tif	5	TRUE	913.02
LRB456	d1	r4	../d1_r4_triple/LRB456_d1_r4/Snap-1195-Image Export-71.tif	6	TRUE	883.059
LRB456	d1	r4	../d1_r4_triple/LRB456_d1_r4/Snap-1195-Image Export-71.tif	7	TRUE	720.84
LRB456	d1	r4	../d1_r4_triple/LRB456_d1_r4/Snap-1196-Image Export-72.tif	1	TRUE	755.222
LRB456	d1	r4	../d1_r4_triple/LRB456_d1_r4/Snap-1196-Image Export-72.tif	2	TRUE	865.508
LRB456	d1	r4	../d1_r4_triple/LRB456_d1_r4/Snap-1197-Image Export-73.tif	1	TRUE	817.957
LRB456	d1	r4	../d1_r4_triple/LRB456_d1_r4/Snap-1197-Image Export-73.tif	2	TRUE	812.556
LRB456	d1	r4	../d1_r4_triple/LRB456_d1_r4/Snap-1197-Image Export-73.tif	3	TRUE	831.662
LRB456	d1	r4	../d1_r4_triple/LRB456_d1_r4/Snap-1197-Image Export-73.tif	5	TRUE	902.701
N2	d1	r4	../d1_r4_triple/N2_d1_r4/Snap-1123-Image Export-136.tif	0	TRUE	818.141
N2	d1	r4	../d1_r4_triple/N2_d1_r4/Snap-1106-Image Export-119.tif	0	TRUE	867.431
N2	d1	r4	../d1_r4_triple/N2_d1_r4/Snap-1106-Image Export-119.tif	1	TRUE	831.126
N2	d1	r4	../d1_r4_triple/N2_d1_r4/Snap-1099-Image Export-112.tif	2	TRUE	821.619
N2	d1	r4	../d1_r4_triple/N2_d1_r4/Snap-1099-Image Export-112.tif	3	TRUE	872.165
N2	d1	r4	../d1_r4_triple/N2_d1_r4/Snap-1099-Image Export-112.tif	5	TRUE	851.895
N2	d1	r4	../d1_r4_triple/N2_d1_r4/Snap-1099-Image Export-112.tif	6	TRUE	828.851
N2	d1	r4	../d1_r4_triple/N2_d1_r4/Snap-1099-Image Export-112.tif	7	TRUE	763.304
N2	d1	r4	../d1_r4_triple/N2_d1_r4/Snap-1099-Image Export-112.tif	8	TRUE	840.15
N2	d1	r4	../d1_r4_triple/N2_d1_r4/Snap-1111-Image Export-124.tif	1	TRUE	859.348
N2	d1	r4	../d1_r4_triple/N2_d1_r4/Snap-1111-Image Export-124.tif	2	TRUE	825.817
N2	d1	r4	../d1_r4_triple/N2_d1_r4/Snap-1109-Image Export-122.tif	0	TRUE	862.566
N2	d1	r4	../d1_r4_triple/N2_d1_r4/Snap-1109-Image Export-122.tif	1	TRUE	846.402
N2	d1	r4	../d1_r4_triple/N2_d1_r4/Snap-1085-Image Export-98.tif	0	TRUE	888.146
N2	d1	r4	../d1_r4_triple/N2_d1_r4/Snap-1085-Image Export-98.tif	2	TRUE	796.392
N2	d1	r4	../d1_r4_triple/N2_d1_r4/Snap-1085-Image Export-98.tif	3	TRUE	805.232
N2	d1	r4	../d1_r4_triple/N2_d1_r4/Snap-1085-Image Export-98.tif	4	TRUE	823.45
N2	d1	r4	../d1_r4_triple/N2_d1_r4/Snap-1095-Image Export-108.tif	2	TRUE	809.967
N2	d1	r4	../d1_r4_triple/N2_d1_r4/Snap-1095-Image Export-108.tif	3	TRUE	822.691
N2	d1	r4	../d1_r4_triple/N2_d1_r4/Snap-1095-Image Export-108.tif	5	TRUE	828.184
N2	d1	r4	../d1_r4_triple/N2_d1_r4/Snap-1095-Image Export-108.tif	6	TRUE	763.304
N2	d1	r4	../d1_r4_triple/N2_d1_r4/Snap-1095-Image Export-108.tif	7	TRUE	849.305
N2	d1	r4	../d1_r4_triple/N2_d1_r4/Snap-1095-Image Export-108.tif	8	TRUE	847.827
N2	d1	r4	../d1_r4_triple/N2_d1_r4/Snap-1093-Image Export-106.tif	0	TRUE	822.507
N2	d1	r4	../d1_r4_triple/N2_d1_r4/Snap-1086-Image Export-99.tif	0	TRUE	837.155
N2	d1	r4	../d1_r4_triple/N2_d1_r4/Snap-1086-Image Export-99.tif	1	TRUE	855.687
N2	d1	r4	../d1_r4_triple/N2_d1_r4/Snap-1086-Image Export-99.tif	2	TRUE	844.257
N2	d1	r4	../d1_r4_triple/N2_d1_r4/Snap-1086-Image Export-99.tif	3	TRUE	829.295
N2	d1	r4	../d1_r4_triple/N2_d1_r4/Snap-1100-Image Export-113.tif	0	TRUE	781.966
N2	d1	r4	../d1_r4_triple/N2_d1_r4/Snap-1100-Image Export-113.tif	1	TRUE	837.913
N2	d1	r4	../d1_r4_triple/N2_d1_r4/Snap-1114-Image Export-127.tif	0	TRUE	723.299
N2	d1	r4	../d1_r4_triple/N2_d1_r4/Snap-1114-Image Export-127.tif	1	TRUE	816.088
N2	d1	r4	../d1_r4_triple/N2_d1_r4/Snap-1101-Image Export-114.tif	2	TRUE	870.242
N2	d1	r4	../d1_r4_triple/N2_d1_r4/Snap-1101-Image Export-114.tif	4	TRUE	841.223
N2	d1	r4	../d1_r4_triple/N2_d1_r4/Snap-1122-Image Export-135.tif	0	TRUE	830.774
N2	d1	r4	../d1_r4_triple/N2_d1_r4/Snap-1104-Image Export-117.tif	0	TRUE	790.493
N2	d1	r4	../d1_r4_triple/N2_d1_r4/Snap-1104-Image Export-117.tif	1	TRUE	839.392
N2	d1	r4	../d1_r4_triple/N2_d1_r4/Snap-1110-Image Export-123.tif	3	TRUE	866.986
N2	d1	r4	../d1_r4_triple/N2_d1_r4/Snap-1110-Image Export-123.tif	4	TRUE	839.836
N2	d1	r4	../d1_r4_triple/N2_d1_r4/Snap-1110-Image Export-123.tif	5	TRUE	826.261
N2	d1	r4	../d1_r4_triple/N2_d1_r4/Snap-1098-Image Export-111.tif	2	TRUE	841.889
N2	d1	r4	../d1_r4_triple/N2_d1_r4/Snap-1098-Image Export-111.tif	5	TRUE	816.44
N2	d1	r4	../d1_r4_triple/N2_d1_r4/Snap-1098-Image Export-111.tif	6	TRUE	881.45
N2	d1	r4	../d1_r4_triple/N2_d1_r4/Snap-1098-Image Export-111.tif	7	TRUE	853.634
N2	d1	r4	../d1_r4_triple/N2_d1_r4/Snap-1098-Image Export-111.tif	8	TRUE	843.054
N2	d1	r4	../d1_r4_triple/N2_d1_r4/Snap-1098-Image Export-111.tif	9	TRUE	842.556
N2	d1	r4	../d1_r4_triple/N2_d1_r4/Snap-1108-Image Export-121.tif	0	TRUE	794.155
N2	d1	r4	../d1_r4_triple/N2_d1_r4/Snap-1108-Image Export-121.tif	1	TRUE	835.546
N2	d1	r4	../d1_r4_triple/N2_d1_r4/Snap-1097-Image Export-110.tif	1	TRUE	844.257
N2	d1	r4	../d1_r4_triple/N2_d1_r4/Snap-1097-Image Export-110.tif	2	TRUE	813.445
N2	d1	r4	../d1_r4_triple/N2_d1_r4/Snap-1097-Image Export-110.tif	3	TRUE	846.624
N2	d1	r4	../d1_r4_triple/N2_d1_r4/Snap-1097-Image Export-110.tif	4	TRUE	853.948
N2	d1	r4	../d1_r4_triple/N2_d1_r4/Snap-1097-Image Export-110.tif	9	TRUE	889.977
N2	d1	r4	../d1_r4_triple/N2_d1_r4/Snap-1097-Image Export-110.tif	10	TRUE	835.822
N2	d1	r4	../d1_r4_triple/N2_d1_r4/Snap-1097-Image Export-110.tif	11	TRUE	826.89
N2	d1	r4	../d1_r4_triple/N2_d1_r4/Snap-1092-Image Export-105.tif	0	TRUE	822.913
N2	d1	r4	../d1_r4_triple/N2_d1_r4/Snap-1092-Image Export-105.tif	1	TRUE	830.774
N2	d1	r4	../d1_r4_triple/N2_d1_r4/Snap-1092-Image Export-105.tif	2	TRUE	780.541
N2	d1	r4	../d1_r4_triple/N2_d1_r4/Snap-1092-Image Export-105.tif	3	TRUE	825.059
N2	d1	r4	../d1_r4_triple/N2_d1_r4/Snap-1092-Image Export-105.tif	4	TRUE	859.31
N2	d1	r4	../d1_r4_triple/N2_d1_r4/Snap-1116-Image Export-129.tif	1	TRUE	834.382
N2	d1	r4	../d1_r4_triple/N2_d1_r4/Snap-1116-Image Export-129.tif	2	TRUE	833.455
N2	d1	r4	../d1_r4_triple/N2_d1_r4/Snap-1116-Image Export-129.tif	3	TRUE	850.102
N2	d1	r4	../d1_r4_triple/N2_d1_r4/Snap-1116-Image Export-129.tif	4	TRUE	825.947
N2	d1	r4	../d1_r4_triple/N2_d1_r4/Snap-1107-Image Export-120.tif	1	TRUE	805.454
N2	d1	r4	../d1_r4_triple/N2_d1_r4/Snap-1107-Image Export-120.tif	3	TRUE	829.387
N2	d1	r4	../d1_r4_triple/N2_d1_r4/Snap-1119-Image Export-132.tif	0	TRUE	818.937
N2	d1	r4	../d1_r4_triple/N2_d1_r4/Snap-1119-Image Export-132.tif	2	TRUE	847.919
N2	d1	r4	../d1_r4_triple/N2_d1_r4/Snap-1119-Image Export-132.tif	3	TRUE	829.165
N2	d1	r4	../d1_r4_triple/N2_d1_r4/Snap-1119-Image Export-132.tif	4	TRUE	846.31
N2	d1	r4	../d1_r4_triple/N2_d1_r4/Snap-1091-Image Export-104.tif	1	TRUE	830.59
N2	d1	r4	../d1_r4_triple/N2_d1_r4/Snap-1091-Image Export-104.tif	2	TRUE	813.184
N2	d1	r4	../d1_r4_triple/N2_d1_r4/Snap-1091-Image Export-104.tif	4	TRUE	836.933
N2	d1	r4	../d1_r4_triple/N2_d1_r4/Snap-1115-Image Export-128.tif	0	TRUE	888.107
N2	d1	r4	../d1_r4_triple/N2_d1_r4/Snap-1115-Image Export-128.tif	1	TRUE	793.266
N2	d1	r4	../d1_r4_triple/N2_d1_r4/Snap-1115-Image Export-128.tif	3	TRUE	853.948
N2	d1	r4	../d1_r4_triple/N2_d1_r4/Snap-1089-Image Export-102.tif	0	TRUE	776.121
N2	d1	r4	../d1_r4_triple/N2_d1_r4/Snap-1113-Image Export-126.tif	0	TRUE	787.773
N2	d1	r4	../d1_r4_triple/N2_d1_r4/Snap-1113-Image Export-126.tif	1	TRUE	819.658
N2	d1	r4	../d1_r4_triple/N2_d1_r4/Snap-1094-Image Export-107.tif	1	TRUE	807.063
N2	d1	r4	../d1_r4_triple/N2_d1_r4/Snap-1094-Image Export-107.tif	2	TRUE	845.681
N2	d1	r4	../d1_r4_triple/N2_d1_r4/Snap-1094-Image Export-107.tif	3	TRUE	856.093
N2	d1	r4	../d1_r4_triple/N2_d1_r4/Snap-1094-Image Export-107.tif	4	TRUE	826.039
N2	d1	r4	../d1_r4_triple/N2_d1_r4/Snap-1121-Image Export-134.tif	0	TRUE	837.561
N2	d1	r4	../d1_r4_triple/N2_d1_r4/Snap-1121-Image Export-134.tif	1	TRUE	857.702
N2	d1	r4	../d1_r4_triple/N2_d1_r4/Snap-1102-Image Export-115.tif	0	TRUE	877.788
N2	d1	r4	../d1_r4_triple/N2_d1_r4/Snap-1102-Image Export-115.tif	1	TRUE	865.692
N2	d1	r4	../d1_r4_triple/N2_d1_r4/Snap-1102-Image Export-115.tif	3	TRUE	875.735
N2	d1	r4	../d1_r4_triple/N2_d1_r4/Snap-1124-Image Export-137.tif	0	TRUE	862.788
N2	d1	r4	../d1_r4_triple/N2_d1_r4/Snap-1084-Image Export-97.tif	1	TRUE	801.034
N2	d1	r4	../d1_r4_triple/N2_d1_r4/Snap-1084-Image Export-97.tif	3	TRUE	795.319
N2	d1	r4	../d1_r4_triple/N2_d1_r4/Snap-1084-Image Export-97.tif	4	TRUE	799.333
N2	d1	r4	../d1_r4_triple/N2_d1_r4/Snap-1118-Image Export-131.tif	1	TRUE	841.759
N2	d1	r4	../d1_r4_triple/N2_d1_r4/Snap-1118-Image Export-131.tif	3	TRUE	893.861
N2	d1	r4	../d1_r4_triple/N2_d1_r4/Snap-1118-Image Export-131.tif	4	TRUE	806.619
N2	d1	r4	../d1_r4_triple/N2_d1_r4/Snap-1112-Image Export-125.tif	3	TRUE	842.962
N2	d1	r4	../d1_r4_triple/N2_d1_r4/Snap-1112-Image Export-125.tif	5	TRUE	859.034
N2	d1	r4	../d1_r4_triple/N2_d1_r4/Snap-1096-Image Export-109.tif	2	TRUE	840.15
N2	d1	r4	../d1_r4_triple/N2_d1_r4/Snap-1096-Image Export-109.tif	4	TRUE	859.977
N2	d1	r4	../d1_r4_triple/N2_d1_r4/Snap-1096-Image Export-109.tif	5	TRUE	844.571
N2	d1	r4	../d1_r4_triple/N2_d1_r4/Snap-1096-Image Export-109.tif	6	TRUE	853.726
N2	d1	r4	../d1_r4_triple/N2_d1_r4/Snap-1087-Image Export-100.tif	0	TRUE	869.798
N2	d1	r4	../d1_r4_triple/N2_d1_r4/Snap-1087-Image Export-100.tif	1	TRUE	852.469
N2	d1	r4	../d1_r4_triple/N2_d1_r4/Snap-1120-Image Export-133.tif	1	TRUE	821.435
N2	d1	r4	../d1_r4_triple/N2_d1_r4/Snap-1120-Image Export-133.tif	3	TRUE	871.851
N2	d1	r4	../d1_r4_triple/N2_d1_r4/Snap-1120-Image Export-133.tif	4	TRUE	854.928
N2	d1	r4	../d1_r4_triple/N2_d1_r4/Snap-1103-Image Export-116.tif	0	TRUE	844.701
N2	d1	r4	../d1_r4_triple/N2_d1_r4/Snap-1090-Image Export-103.tif	1	TRUE	872.832
N2	d1	r4	../d1_r4_triple/N2_d1_r4/Snap-1090-Image Export-103.tif	2	TRUE	883.503
N2	d1	r4	../d1_r4_triple/N2_d1_r4/Snap-1090-Image Export-103.tif	3	TRUE	869.262
N2	d1	r4	../d1_r4_triple/N2_d1_r4/Snap-1090-Image Export-103.tif	4	TRUE	829.257
N2	d1	r4	../d1_r4_triple/N2_d1_r4/Snap-1083-Image Export-96.tif	0	TRUE	819.696
N2	d1	r4	../d1_r4_triple/N2_d1_r4/Snap-1083-Image Export-96.tif	1	TRUE	844.257
N2	d1	r4	../d1_r4_triple/N2_d1_r4/Snap-1083-Image Export-96.tif	2	TRUE	851.044
N2	d1	r4	../d1_r4_triple/N2_d1_r4/Snap-1083-Image Export-96.tif	3	TRUE	832.106
N2	d1	r4	../d1_r4_triple/N2_d1_r4/Snap-1083-Image Export-96.tif	4	TRUE	843.406
CF1038	d1	r5	../d1_r5_triple/CF1038_d1_r5/Snap-1734-Image Export-33.tif	0	TRUE	811.039
CF1038	d1	r5	../d1_r5_triple/CF1038_d1_r5/Snap-1734-Image Export-33.tif	1	TRUE	797.778
CF1038	d1	r5	../d1_r5_triple/CF1038_d1_r5/Snap-1734-Image Export-33.tif	3	TRUE	843.276
CF1038	d1	r5	../d1_r5_triple/CF1038_d1_r5/Snap-1734-Image Export-33.tif	4	TRUE	871.315
CF1038	d1	r5	../d1_r5_triple/CF1038_d1_r5/Snap-1734-Image Export-33.tif	5	TRUE	843.054
CF1038	d1	r5	../d1_r5_triple/CF1038_d1_r5/Snap-1734-Image Export-33.tif	6	TRUE	855.28
CF1038	d1	r5	../d1_r5_triple/CF1038_d1_r5/Snap-1736-Image Export-35.tif	1	TRUE	748.527
CF1038	d1	r5	../d1_r5_triple/CF1038_d1_r5/Snap-1736-Image Export-35.tif	2	TRUE	897.798
CF1038	d1	r5	../d1_r5_triple/CF1038_d1_r5/Snap-1736-Image Export-35.tif	3	TRUE	766.782
CF1038	d1	r5	../d1_r5_triple/CF1038_d1_r5/Snap-1736-Image Export-35.tif	4	TRUE	817.198
CF1038	d1	r5	../d1_r5_triple/CF1038_d1_r5/Snap-1736-Image Export-35.tif	5	TRUE	826.706
CF1038	d1	r5	../d1_r5_triple/CF1038_d1_r5/Snap-1736-Image Export-35.tif	6	TRUE	858.276
CF1038	d1	r5	../d1_r5_triple/CF1038_d1_r5/Snap-1703-Image Export-02.tif	0	TRUE	787.015
CF1038	d1	r5	../d1_r5_triple/CF1038_d1_r5/Snap-1703-Image Export-02.tif	1	TRUE	834.788
CF1038	d1	r5	../d1_r5_triple/CF1038_d1_r5/Snap-1703-Image Export-02.tif	3	TRUE	899.039
CF1038	d1	r5	../d1_r5_triple/CF1038_d1_r5/Snap-1731-Image Export-30.tif	0	TRUE	820.01
CF1038	d1	r5	../d1_r5_triple/CF1038_d1_r5/Snap-1731-Image Export-30.tif	1	TRUE	885.74
CF1038	d1	r5	../d1_r5_triple/CF1038_d1_r5/Snap-1731-Image Export-30.tif	2	TRUE	834.88
CF1038	d1	r5	../d1_r5_triple/CF1038_d1_r5/Snap-1706-Image Export-05.tif	2	TRUE	818.807
CF1038	d1	r5	../d1_r5_triple/CF1038_d1_r5/Snap-1706-Image Export-05.tif	4	TRUE	883.909
CF1038	d1	r5	../d1_r5_triple/CF1038_d1_r5/Snap-1706-Image Export-05.tif	10	TRUE	858.368
CF1038	d1	r5	../d1_r5_triple/CF1038_d1_r5/Snap-1706-Image Export-05.tif	12	TRUE	857.073
CF1038	d1	r5	../d1_r5_triple/CF1038_d1_r5/Snap-1706-Image Export-05.tif	13	TRUE	825.281
CF1038	d1	r5	../d1_r5_triple/CF1038_d1_r5/Snap-1706-Image Export-05.tif	16	TRUE	889.846
CF1038	d1	r5	../d1_r5_triple/CF1038_d1_r5/Snap-1733-Image Export-32.tif	0	TRUE	877.436
CF1038	d1	r5	../d1_r5_triple/CF1038_d1_r5/Snap-1733-Image Export-32.tif	1	TRUE	763.527
[truncated: 1,896 more rows]

## Sheet: Fig_4E
Strain	Replicate	HoursPostBleach	Nuclear	More Nuclear	More Cytoplasmic	Cytoplasmic	Total	Strain	Percent Nuclear	Percent More Nuclear	Percent More Cytoplasmic	Percent Cytoplasmic	Total Percent Nuclear	Total Percent Cytoplasmic
OT971	1	48hr	0	7	23	27	57	OT971	0	0.122807	0.403509	0.473684	0.122807	0.877193
LRB463	1	48hr	1	9	23	19	52	LRB463	0.0192308	0.173077	0.442308	0.365385	0.192308	0.807692
OT971	2	48hr	3	3	7	50	63	OT971	0.047619	0.047619	0.111111	0.793651	0.0952381	0.904762
LRB463	2	48hr	1	8	20	24	53	LRB463	0.0188679	0.150943	0.377358	0.45283	0.169811	0.830189
OT971	3	48hr	2	14	24	19	59	OT971	0.0338983	0.237288	0.40678	0.322034	0.271186	0.728814
LRB463	3	48hr	1	3	9	42	55	LRB463	0.0181818	0.0545455	0.163636	0.763636	0.0727273	0.927273
OT971	4	48hr	1	4	12	34	51	OT971	0.0196078	0.0784314	0.235294	0.666667	0.0980392	0.901961
LRB463	4	48hr	4	13	28	19	64	LRB463	0.0625	0.203125	0.4375	0.296875	0.265625	0.734375
OT971	5	48hr	2	2	14	36	54	OT971	0.037037	0.037037	0.259259	0.666667	0.0740741	0.925926
LRB463	5	48hr	7	10	18	20	55	LRB463	0.127273	0.181818	0.327273	0.363636	0.309091	0.690909
OT971	6	48hr	0	2	8	41	51	OT971	0	0.0392157	0.156863	0.803922	0.0392157	0.960784
LRB463	6	48hr	2	11	25	24	62	LRB463	0.0322581	0.177419	0.403226	0.387097	0.209677	0.790323
