# Supplementary material for: Using population selection and sequencing to characterize natural variation of starvation resistance in Caenorhabditis elegans
Source: eLife. 2022 Jun 21;11:e80204. doi: 10.7554/eLife.80204 (PMC9262388; doi:10.7554/eLife.80204)
Supplement: Supplementary file 2. [file elife-80204-supp2.xlsx]

## Sheet: README
Data S2: GWAS mapping and CRISPR sequences
Sheets included in this file:
SignificantQTL: Coordinates of the QTL using slope and PC1 trait values
PC1_mapping: Markers used to perform GWAS. For significant QTL, genotypes for each strain are shown
Slope_mapping: Markers used to perform GWAS. For significant QTL, genotypes for each strain are shown
VariantsInQTL: Variants within QTL for both Slope and PC1 trait values. Top candidate irld-39 identified based on VARIANT_IMPACT and VARIANT_LOG10p. Unique sequence names were used from this sheet to determine enrichment using WormCat in Fig 3C.
FineMapping_irlds: Genotype information for each strain and irld-39 and irld-52 high impact variants
Divergence_irlds: Indicates whether each strain is considered hyper-divergent at irld-11 and irld-57 loci.
WormCat_output: Results from WormCat Category 3
VariantQTL_proteinDomains: Protein domains for each gene with variants in the QTL, when available. irld genes are those with Recep_L_domain as the hmm name
CRISPR_sequences: sgRNAs, repair templates, and primers used to generate and confirm edits for irld-39, irld-52, irld-11, and irld-57. Two sgRNAs were used for irld-11 and irld-57 to delete the entire gene in each case.
Genotyping: Primer sequences and restriction enzymes used to perform successive crosses in N2 and DL238 or EG4725 and MY2147 backgrounds to generate near-isogenic lines (NILs). Full output from VCF-kit to generate these primers is available. Primers used to genotype for daf-16(mu86) are also available.
NIL_seq: Genomic coordinates for genotype switching of near-isogenic lines (NILs) generated from N2 and DL238 or EG4725 and MY2147 pairs. Corresponds to Supplementary Figure 5.

## Sheet: SignificantQTL
Trait	Chromosome	Left_Interval	Peak	Right_Interval
PC1	V	1345848	2069474	2764788	1418940
PC1	V	15775895	16569761	18065050	2289155
Slope	IV	15939340	16218716	16613710	674370
Slope	V	15660911	16126069	17615557	1954646

## Sheet: PC1_mapping
marker	CHROM	POS	log10p	trait	BF	aboveBF	strain	value	allele	var.exp	startPOS	peakPOS	endPOS	peak_id	interval_size
I_5317	I	5317	0.556794	PC1	4.05719	0	NA	NA	NA	NA	NA	NA	NA	NA	NA
I_7565	I	7565	0.112571	PC1	4.05719	0	NA	NA	NA	NA	NA	NA	NA	NA	NA
I_8174	I	8174	0.0446942	PC1	4.05719	0	NA	NA	NA	NA	NA	NA	NA	NA	NA
I_10291	I	10291	0.0536253	PC1	4.05719	0	NA	NA	NA	NA	NA	NA	NA	NA	NA
I_12921	I	12921	0.386906	PC1	4.05719	0	NA	NA	NA	NA	NA	NA	NA	NA	NA
I_15024	I	15024	0.373503	PC1	4.05719	0	NA	NA	NA	NA	NA	NA	NA	NA	NA
I_16266	I	16266	0.0118072	PC1	4.05719	0	NA	NA	NA	NA	NA	NA	NA	NA	NA
I_17509	I	17509	0.103375	PC1	4.05719	0	NA	NA	NA	NA	NA	NA	NA	NA	NA
I_30896	I	30896	0.870692	PC1	4.05719	0	NA	NA	NA	NA	NA	NA	NA	NA	NA
I_32533	I	32533	0.278208	PC1	4.05719	0	NA	NA	NA	NA	NA	NA	NA	NA	NA
I_33667	I	33667	0.556794	PC1	4.05719	0	NA	NA	NA	NA	NA	NA	NA	NA	NA
I_36410	I	36410	0.112571	PC1	4.05719	0	NA	NA	NA	NA	NA	NA	NA	NA	NA
I_36666	I	36666	0.386906	PC1	4.05719	0	NA	NA	NA	NA	NA	NA	NA	NA	NA
I_41657	I	41657	0.0446942	PC1	4.05719	0	NA	NA	NA	NA	NA	NA	NA	NA	NA
I_43806	I	43806	0.0118072	PC1	4.05719	0	NA	NA	NA	NA	NA	NA	NA	NA	NA
I_46655	I	46655	0.779268	PC1	4.05719	0	NA	NA	NA	NA	NA	NA	NA	NA	NA
I_47642	I	47642	0.337754	PC1	4.05719	0	NA	NA	NA	NA	NA	NA	NA	NA	NA
I_62642	I	62642	0.214705	PC1	4.05719	0	NA	NA	NA	NA	NA	NA	NA	NA	NA
I_64161	I	64161	0.0446942	PC1	4.05719	0	NA	NA	NA	NA	NA	NA	NA	NA	NA
I_64950	I	64950	0.556794	PC1	4.05719	0	NA	NA	NA	NA	NA	NA	NA	NA	NA
I_68640	I	68640	0.386906	PC1	4.05719	0	NA	NA	NA	NA	NA	NA	NA	NA	NA
I_76311	I	76311	0.337754	PC1	4.05719	0	NA	NA	NA	NA	NA	NA	NA	NA	NA
I_91269	I	91269	0.0118072	PC1	4.05719	0	NA	NA	NA	NA	NA	NA	NA	NA	NA
I_99548	I	99548	0.0536253	PC1	4.05719	0	NA	NA	NA	NA	NA	NA	NA	NA	NA
I_105133	I	105133	0.556794	PC1	4.05719	0	NA	NA	NA	NA	NA	NA	NA	NA	NA
I_105242	I	105242	0.386906	PC1	4.05719	0	NA	NA	NA	NA	NA	NA	NA	NA	NA
I_105302	I	105302	0.0446942	PC1	4.05719	0	NA	NA	NA	NA	NA	NA	NA	NA	NA
I_107175	I	107175	0.636134	PC1	4.05719	0	NA	NA	NA	NA	NA	NA	NA	NA	NA
I_116338	I	116338	0.0421637	PC1	4.05719	0	NA	NA	NA	NA	NA	NA	NA	NA	NA
I_122734	I	122734	0.0118072	PC1	4.05719	0	NA	NA	NA	NA	NA	NA	NA	NA	NA
I_131808	I	131808	0.0536253	PC1	4.05719	0	NA	NA	NA	NA	NA	NA	NA	NA	NA
I_134997	I	134997	0.556794	PC1	4.05719	0	NA	NA	NA	NA	NA	NA	NA	NA	NA
I_135132	I	135132	0.337754	PC1	4.05719	0	NA	NA	NA	NA	NA	NA	NA	NA	NA
I_136765	I	136765	0.0446942	PC1	4.05719	0	NA	NA	NA	NA	NA	NA	NA	NA	NA
I_141329	I	141329	0.0933186	PC1	4.05719	0	NA	NA	NA	NA	NA	NA	NA	NA	NA
I_144778	I	144778	0.386906	PC1	4.05719	0	NA	NA	NA	NA	NA	NA	NA	NA	NA
I_148495	I	148495	0.0951852	PC1	4.05719	0	NA	NA	NA	NA	NA	NA	NA	NA	NA
I_161015	I	161015	0.194283	PC1	4.05719	0	NA	NA	NA	NA	NA	NA	NA	NA	NA
I_161490	I	161490	0.103375	PC1	4.05719	0	NA	NA	NA	NA	NA	NA	NA	NA	NA
I_162406	I	162406	0.0118072	PC1	4.05719	0	NA	NA	NA	NA	NA	NA	NA	NA	NA
I_164048	I	164048	0.0536253	PC1	4.05719	0	NA	NA	NA	NA	NA	NA	NA	NA	NA
I_166880	I	166880	0.556794	PC1	4.05719	0	NA	NA	NA	NA	NA	NA	NA	NA	NA
I_170568	I	170568	0.0446942	PC1	4.05719	0	NA	NA	NA	NA	NA	NA	NA	NA	NA
I_172908	I	172908	0.337754	PC1	4.05719	0	NA	NA	NA	NA	NA	NA	NA	NA	NA
I_176206	I	176206	0.113789	PC1	4.05719	0	NA	NA	NA	NA	NA	NA	NA	NA	NA
I_184470	I	184470	0.373503	PC1	4.05719	0	NA	NA	NA	NA	NA	NA	NA	NA	NA
I_200231	I	200231	0.0118072	PC1	4.05719	0	NA	NA	NA	NA	NA	NA	NA	NA	NA
I_206753	I	206753	0.386906	PC1	4.05719	0	NA	NA	NA	NA	NA	NA	NA	NA	NA
I_208245	I	208245	0.0446942	PC1	4.05719	0	NA	NA	NA	NA	NA	NA	NA	NA	NA
I_209800	I	209800	0.556794	PC1	4.05719	0	NA	NA	NA	NA	NA	NA	NA	NA	NA
I_210602	I	210602	0.0536253	PC1	4.05719	0	NA	NA	NA	NA	NA	NA	NA	NA	NA
I_212949	I	212949	0.337754	PC1	4.05719	0	NA	NA	NA	NA	NA	NA	NA	NA	NA
I_233154	I	233154	0.636134	PC1	4.05719	0	NA	NA	NA	NA	NA	NA	NA	NA	NA
I_241751	I	241751	0.107288	PC1	4.05719	0	NA	NA	NA	NA	NA	NA	NA	NA	NA
I_242133	I	242133	0.112571	PC1	4.05719	0	NA	NA	NA	NA	NA	NA	NA	NA	NA
I_257676	I	257676	0.0536253	PC1	4.05719	0	NA	NA	NA	NA	NA	NA	NA	NA	NA
I_258159	I	258159	0.556794	PC1	4.05719	0	NA	NA	NA	NA	NA	NA	NA	NA	NA
I_258951	I	258951	0.0446942	PC1	4.05719	0	NA	NA	NA	NA	NA	NA	NA	NA	NA
I_261900	I	261900	0.0665538	PC1	4.05719	0	NA	NA	NA	NA	NA	NA	NA	NA	NA
I_265285	I	265285	0.386906	PC1	4.05719	0	NA	NA	NA	NA	NA	NA	NA	NA	NA
I_275446	I	275446	0.191866	PC1	4.05719	0	NA	NA	NA	NA	NA	NA	NA	NA	NA
I_276422	I	276422	0.511317	PC1	4.05719	0	NA	NA	NA	NA	NA	NA	NA	NA	NA
I_276983	I	276983	0.372558	PC1	4.05719	0	NA	NA	NA	NA	NA	NA	NA	NA	NA
I_279038	I	279038	0.0446942	PC1	4.05719	0	NA	NA	NA	NA	NA	NA	NA	NA	NA
I_279389	I	279389	0.337754	PC1	4.05719	0	NA	NA	NA	NA	NA	NA	NA	NA	NA
I_280420	I	280420	0.0951852	PC1	4.05719	0	NA	NA	NA	NA	NA	NA	NA	NA	NA
I_284473	I	284473	0.0536253	PC1	4.05719	0	NA	NA	NA	NA	NA	NA	NA	NA	NA
I_289771	I	289771	0.386906	PC1	4.05719	0	NA	NA	NA	NA	NA	NA	NA	NA	NA
I_290682	I	290682	0.556794	PC1	4.05719	0	NA	NA	NA	NA	NA	NA	NA	NA	NA
I_293295	I	293295	0.0118072	PC1	4.05719	0	NA	NA	NA	NA	NA	NA	NA	NA	NA
I_314248	I	314248	0.103375	PC1	4.05719	0	NA	NA	NA	NA	NA	NA	NA	NA	NA
I_315543	I	315543	0.0446942	PC1	4.05719	0	NA	NA	NA	NA	NA	NA	NA	NA	NA
I_316509	I	316509	0.337754	PC1	4.05719	0	NA	NA	NA	NA	NA	NA	NA	NA	NA
I_316697	I	316697	0.0536253	PC1	4.05719	0	NA	NA	NA	NA	NA	NA	NA	NA	NA
I_321873	I	321873	0.386906	PC1	4.05719	0	NA	NA	NA	NA	NA	NA	NA	NA	NA
I_325480	I	325480	0.0118072	PC1	4.05719	0	NA	NA	NA	NA	NA	NA	NA	NA	NA
I_329119	I	329119	0.278208	PC1	4.05719	0	NA	NA	NA	NA	NA	NA	NA	NA	NA
I_329345	I	329345	0.556794	PC1	4.05719	0	NA	NA	NA	NA	NA	NA	NA	NA	NA
I_345372	I	345372	0.0805976	PC1	4.05719	0	NA	NA	NA	NA	NA	NA	NA	NA	NA
I_358866	I	358866	0.0446942	PC1	4.05719	0	NA	NA	NA	NA	NA	NA	NA	NA	NA
I_362395	I	362395	0.261531	PC1	4.05719	0	NA	NA	NA	NA	NA	NA	NA	NA	NA
I_363877	I	363877	0.337754	PC1	4.05719	0	NA	NA	NA	NA	NA	NA	NA	NA	NA
I_368392	I	368392	0.200145	PC1	4.05719	0	NA	NA	NA	NA	NA	NA	NA	NA	NA
I_370339	I	370339	0.373503	PC1	4.05719	0	NA	NA	NA	NA	NA	NA	NA	NA	NA
I_377648	I	377648	0.556794	PC1	4.05719	0	NA	NA	NA	NA	NA	NA	NA	NA	NA
I_377706	I	377706	0.30377	PC1	4.05719	0	NA	NA	NA	NA	NA	NA	NA	NA	NA
I_379448	I	379448	0.0231751	PC1	4.05719	0	NA	NA	NA	NA	NA	NA	NA	NA	NA
I_379475	I	379475	0.386906	PC1	4.05719	0	NA	NA	NA	NA	NA	NA	NA	NA	NA
I_391502	I	391502	0.00249227	PC1	4.05719	0	NA	NA	NA	NA	NA	NA	NA	NA	NA
I_395423	I	395423	0.168554	PC1	4.05719	0	NA	NA	NA	NA	NA	NA	NA	NA	NA
I_398235	I	398235	0.0446942	PC1	4.05719	0	NA	NA	NA	NA	NA	NA	NA	NA	NA
I_411686	I	411686	0.0805976	PC1	4.05719	0	NA	NA	NA	NA	NA	NA	NA	NA	NA
I_413008	I	413008	0.107288	PC1	4.05719	0	NA	NA	NA	NA	NA	NA	NA	NA	NA
I_417076	I	417076	0.243997	PC1	4.05719	0	NA	NA	NA	NA	NA	NA	NA	NA	NA
I_417787	I	417787	0.172175	PC1	4.05719	0	NA	NA	NA	NA	NA	NA	NA	NA	NA
I_418319	I	418319	0.0177951	PC1	4.05719	0	NA	NA	NA	NA	NA	NA	NA	NA	NA
I_424209	I	424209	0.556794	PC1	4.05719	0	NA	NA	NA	NA	NA	NA	NA	NA	NA
I_425626	I	425626	0.285692	PC1	4.05719	0	NA	NA	NA	NA	NA	NA	NA	NA	NA
I_425673	I	425673	0.269845	PC1	4.05719	0	NA	NA	NA	NA	NA	NA	NA	NA	NA
I_428363	I	428363	0.103375	PC1	4.05719	0	NA	NA	NA	NA	NA	NA	NA	NA	NA
I_431736	I	431736	0.474726	PC1	4.05719	0	NA	NA	NA	NA	NA	NA	NA	NA	NA
I_432210	I	432210	0.0536253	PC1	4.05719	0	NA	NA	NA	NA	NA	NA	NA	NA	NA
I_438177	I	438177	0.386906	PC1	4.05719	0	NA	NA	NA	NA	NA	NA	NA	NA	NA
I_442895	I	442895	0.556794	PC1	4.05719	0	NA	NA	NA	NA	NA	NA	NA	NA	NA
I_443513	I	443513	0.0602548	PC1	4.05719	0	NA	NA	NA	NA	NA	NA	NA	NA	NA
I_446900	I	446900	0.0562208	PC1	4.05719	0	NA	NA	NA	NA	NA	NA	NA	NA	NA
I_448204	I	448204	0.0699972	PC1	4.05719	0	NA	NA	NA	NA	NA	NA	NA	NA	NA
I_449122	I	449122	0.474726	PC1	4.05719	0	NA	NA	NA	NA	NA	NA	NA	NA	NA
I_449393	I	449393	0.0536253	PC1	4.05719	0	NA	NA	NA	NA	NA	NA	NA	NA	NA
I_452643	I	452643	0.686739	PC1	4.05719	0	NA	NA	NA	NA	NA	NA	NA	NA	NA
I_453292	I	453292	0.643064	PC1	4.05719	0	NA	NA	NA	NA	NA	NA	NA	NA	NA
I_465493	I	465493	0.480592	PC1	4.05719	0	NA	NA	NA	NA	NA	NA	NA	NA	NA
I_466067	I	466067	0.373503	PC1	4.05719	0	NA	NA	NA	NA	NA	NA	NA	NA	NA
I_467367	I	467367	0.556794	PC1	4.05719	0	NA	NA	NA	NA	NA	NA	NA	NA	NA
I_468544	I	468544	0.00839763	PC1	4.05719	0	NA	NA	NA	NA	NA	NA	NA	NA	NA
I_470862	I	470862	0.0592967	PC1	4.05719	0	NA	NA	NA	NA	NA	NA	NA	NA	NA
I_473739	I	473739	0.474726	PC1	4.05719	0	NA	NA	NA	NA	NA	NA	NA	NA	NA
I_473991	I	473991	0.226611	PC1	4.05719	0	NA	NA	NA	NA	NA	NA	NA	NA	NA
I_476760	I	476760	0.0531359	PC1	4.05719	0	NA	NA	NA	NA	NA	NA	NA	NA	NA
I_484761	I	484761	0.480592	PC1	4.05719	0	NA	NA	NA	NA	NA	NA	NA	NA	NA
I_485871	I	485871	0.643064	PC1	4.05719	0	NA	NA	NA	NA	NA	NA	NA	NA	NA
I_486474	I	486474	0.0536253	PC1	4.05719	0	NA	NA	NA	NA	NA	NA	NA	NA	NA
I_488232	I	488232	0.00839763	PC1	4.05719	0	NA	NA	NA	NA	NA	NA	NA	NA	NA
I_490346	I	490346	0.556794	PC1	4.05719	0	NA	NA	NA	NA	NA	NA	NA	NA	NA
I_490754	I	490754	0.0592967	PC1	4.05719	0	NA	NA	NA	NA	NA	NA	NA	NA	NA
I_494188	I	494188	0.474726	PC1	4.05719	0	NA	NA	NA	NA	NA	NA	NA	NA	NA
I_495881	I	495881	0.103375	PC1	4.05719	0	NA	NA	NA	NA	NA	NA	NA	NA	NA
I_497133	I	497133	0.19738	PC1	4.05719	0	NA	NA	NA	NA	NA	NA	NA	NA	NA
I_511635	I	511635	0.643064	PC1	4.05719	0	NA	NA	NA	NA	NA	NA	NA	NA	NA
I_513134	I	513134	0.0573913	PC1	4.05719	0	NA	NA	NA	NA	NA	NA	NA	NA	NA
I_516767	I	516767	0.120202	PC1	4.05719	0	NA	NA	NA	NA	NA	NA	NA	NA	NA
I_519493	I	519493	0.0351872	PC1	4.05719	0	NA	NA	NA	NA	NA	NA	NA	NA	NA
I_520486	I	520486	0.0590581	PC1	4.05719	0	NA	NA	NA	NA	NA	NA	NA	NA	NA
I_520966	I	520966	0.11744	PC1	4.05719	0	NA	NA	NA	NA	NA	NA	NA	NA	NA
I_522382	I	522382	0.135722	PC1	4.05719	0	NA	NA	NA	NA	NA	NA	NA	NA	NA
I_523479	I	523479	0.00892917	PC1	4.05719	0	NA	NA	NA	NA	NA	NA	NA	NA	NA
I_525192	I	525192	0.0592967	PC1	4.05719	0	NA	NA	NA	NA	NA	NA	NA	NA	NA
I_528981	I	528981	0.168908	PC1	4.05719	0	NA	NA	NA	NA	NA	NA	NA	NA	NA
I_530262	I	530262	0.643064	PC1	4.05719	0	NA	NA	NA	NA	NA	NA	NA	NA	NA
I_530384	I	530384	0.556794	PC1	4.05719	0	NA	NA	NA	NA	NA	NA	NA	NA	NA
I_530978	I	530978	0.00278328	PC1	4.05719	0	NA	NA	NA	NA	NA	NA	NA	NA	NA
I_533815	I	533815	0.0805976	PC1	4.05719	0	NA	NA	NA	NA	NA	NA	NA	NA	NA
I_543011	I	543011	0.373503	PC1	4.05719	0	NA	NA	NA	NA	NA	NA	NA	NA	NA
I_543021	I	543021	0.23881	PC1	4.05719	0	NA	NA	NA	NA	NA	NA	NA	NA	NA
I_544477	I	544477	0.0446942	PC1	4.05719	0	NA	NA	NA	NA	NA	NA	NA	NA	NA
I_545468	I	545468	0.0573913	PC1	4.05719	0	NA	NA	NA	NA	NA	NA	NA	NA	NA
I_547904	I	547904	0.582538	PC1	4.05719	0	NA	NA	NA	NA	NA	NA	NA	NA	NA
I_549963	I	549963	0.480592	PC1	4.05719	0	NA	NA	NA	NA	NA	NA	NA	NA	NA
I_551501	I	551501	0.0241632	PC1	4.05719	0	NA	NA	NA	NA	NA	NA	NA	NA	NA
I_559307	I	559307	0.0592967	PC1	4.05719	0	NA	NA	NA	NA	NA	NA	NA	NA	NA
I_564889	I	564889	0.556794	PC1	4.05719	0	NA	NA	NA	NA	NA	NA	NA	NA	NA
I_565394	I	565394	0.120875	PC1	4.05719	0	NA	NA	NA	NA	NA	NA	NA	NA	NA
I_571535	I	571535	0.391913	PC1	4.05719	0	NA	NA	NA	NA	NA	NA	NA	NA	NA
I_573005	I	573005	0.643064	PC1	4.05719	0	NA	NA	NA	NA	NA	NA	NA	NA	NA
I_575526	I	575526	0.219496	PC1	4.05719	0	NA	NA	NA	NA	NA	NA	NA	NA	NA
I_578182	I	578182	0.916994	PC1	4.05719	0	NA	NA	NA	NA	NA	NA	NA	NA	NA
I_590598	I	590598	0.0573913	PC1	4.05719	0	NA	NA	NA	NA	NA	NA	NA	NA	NA
I_592825	I	592825	0.0536253	PC1	4.05719	0	NA	NA	NA	NA	NA	NA	NA	NA	NA
I_595105	I	595105	0.204605	PC1	4.05719	0	NA	NA	NA	NA	NA	NA	NA	NA	NA
I_598523	I	598523	0.0592967	PC1	4.05719	0	NA	NA	NA	NA	NA	NA	NA	NA	NA
I_603304	I	603304	0.669989	PC1	4.05719	0	NA	NA	NA	NA	NA	NA	NA	NA	NA
I_606563	I	606563	0.697394	PC1	4.05719	0	NA	NA	NA	NA	NA	NA	NA	NA	NA
I_606864	I	606864	0.113265	PC1	4.05719	0	NA	NA	NA	NA	NA	NA	NA	NA	NA
I_612955	I	612955	0.643064	PC1	4.05719	0	NA	NA	NA	NA	NA	NA	NA	NA	NA
I_614817	I	614817	0.556794	PC1	4.05719	0	NA	NA	NA	NA	NA	NA	NA	NA	NA
I_630429	I	630429	0.140056	PC1	4.05719	0	NA	NA	NA	NA	NA	NA	NA	NA	NA
I_634416	I	634416	0.112316	PC1	4.05719	0	NA	NA	NA	NA	NA	NA	NA	NA	NA
I_634724	I	634724	0.16659	PC1	4.05719	0	NA	NA	NA	NA	NA	NA	NA	NA	NA
I_638022	I	638022	0.760813	PC1	4.05719	0	NA	NA	NA	NA	NA	NA	NA	NA	NA
I_644287	I	644287	0.0938105	PC1	4.05719	0	NA	NA	NA	NA	NA	NA	NA	NA	NA
I_646229	I	646229	0.301584	PC1	4.05719	0	NA	NA	NA	NA	NA	NA	NA	NA	NA
I_647430	I	647430	0.643064	PC1	4.05719	0	NA	NA	NA	NA	NA	NA	NA	NA	NA
I_648306	I	648306	0.0642019	PC1	4.05719	0	NA	NA	NA	NA	NA	NA	NA	NA	NA
I_653481	I	653481	0.333201	PC1	4.05719	0	NA	NA	NA	NA	NA	NA	NA	NA	NA
I_655131	I	655131	0.290233	PC1	4.05719	0	NA	NA	NA	NA	NA	NA	NA	NA	NA
I_655377	I	655377	1.01498	PC1	4.05719	0	NA	NA	NA	NA	NA	NA	NA	NA	NA
I_656310	I	656310	0.477829	PC1	4.05719	0	NA	NA	NA	NA	NA	NA	NA	NA	NA
I_656356	I	656356	0.133261	PC1	4.05719	0	NA	NA	NA	NA	NA	NA	NA	NA	NA
I_659705	I	659705	0.495405	PC1	4.05719	0	NA	NA	NA	NA	NA	NA	NA	NA	NA
I_660382	I	660382	0.495112	PC1	4.05719	0	NA	NA	NA	NA	NA	NA	NA	NA	NA
I_664603	I	664603	0.385943	PC1	4.05719	0	NA	NA	NA	NA	NA	NA	NA	NA	NA
I_664678	I	664678	0.142018	PC1	4.05719	0	NA	NA	NA	NA	NA	NA	NA	NA	NA
I_667420	I	667420	0.129459	PC1	4.05719	0	NA	NA	NA	NA	NA	NA	NA	NA	NA
I_675688	I	675688	0.147187	PC1	4.05719	0	NA	NA	NA	NA	NA	NA	NA	NA	NA
I_675812	I	675812	0.263971	PC1	4.05719	0	NA	NA	NA	NA	NA	NA	NA	NA	NA
I_682522	I	682522	0.132284	PC1	4.05719	0	NA	NA	NA	NA	NA	NA	NA	NA	NA
I_685183	I	685183	0.273513	PC1	4.05719	0	NA	NA	NA	NA	NA	NA	NA	NA	NA
I_690447	I	690447	0.51635	PC1	4.05719	0	NA	NA	NA	NA	NA	NA	NA	NA	NA
I_690570	I	690570	0.643064	PC1	4.05719	0	NA	NA	NA	NA	NA	NA	NA	NA	NA
I_691329	I	691329	0.349779	PC1	4.05719	0	NA	NA	NA	NA	NA	NA	NA	NA	NA
I_691639	I	691639	0.480592	PC1	4.05719	0	NA	NA	NA	NA	NA	NA	NA	NA	NA
I_694829	I	694829	0.737521	PC1	4.05719	0	NA	NA	NA	NA	NA	NA	NA	NA	NA
I_695386	I	695386	0.539339	PC1	4.05719	0	NA	NA	NA	NA	NA	NA	NA	NA	NA
I_703316	I	703316	0.849428	PC1	4.05719	0	NA	NA	NA	NA	NA	NA	NA	NA	NA
I_704341	I	704341	0.0846798	PC1	4.05719	0	NA	NA	NA	NA	NA	NA	NA	NA	NA
I_705454	I	705454	0.276533	PC1	4.05719	0	NA	NA	NA	NA	NA	NA	NA	NA	NA
I_706183	I	706183	0.548103	PC1	4.05719	0	NA	NA	NA	NA	NA	NA	NA	NA	NA
I_708066	I	708066	0.13396	PC1	4.05719	0	NA	NA	NA	NA	NA	NA	NA	NA	NA
I_714900	I	714900	0.145041	PC1	4.05719	0	NA	NA	NA	NA	NA	NA	NA	NA	NA
I_716699	I	716699	0.474726	PC1	4.05719	0	NA	NA	NA	NA	NA	NA	NA	NA	NA
I_721920	I	721920	0.145257	PC1	4.05719	0	NA	NA	NA	NA	NA	NA	NA	NA	NA
I_727377	I	727377	1.34485	PC1	4.05719	0	NA	NA	NA	NA	NA	NA	NA	NA	NA
I_730757	I	730757	1.16708	PC1	4.05719	0	NA	NA	NA	NA	NA	NA	NA	NA	NA
I_736799	I	736799	0.914957	PC1	4.05719	0	NA	NA	NA	NA	NA	NA	NA	NA	NA
I_736943	I	736943	0.222288	PC1	4.05719	0	NA	NA	NA	NA	NA	NA	NA	NA	NA
I_738683	I	738683	0.401784	PC1	4.05719	0	NA	NA	NA	NA	NA	NA	NA	NA	NA
I_739095	I	739095	0.0700779	PC1	4.05719	0	NA	NA	NA	NA	NA	NA	NA	NA	NA
I_740513	I	740513	0.474726	PC1	4.05719	0	NA	NA	NA	NA	NA	NA	NA	NA	NA
I_741614	I	741614	0.83983	PC1	4.05719	0	NA	NA	NA	NA	NA	NA	NA	NA	NA
I_744939	I	744939	1.16708	PC1	4.05719	0	NA	NA	NA	NA	NA	NA	NA	NA	NA
I_744951	I	744951	0.145257	PC1	4.05719	0	NA	NA	NA	NA	NA	NA	NA	NA	NA
I_755155	I	755155	0.914957	PC1	4.05719	0	NA	NA	NA	NA	NA	NA	NA	NA	NA
I_756171	I	756171	0.0688802	PC1	4.05719	0	NA	NA	NA	NA	NA	NA	NA	NA	NA
I_758594	I	758594	0.358045	PC1	4.05719	0	NA	NA	NA	NA	NA	NA	NA	NA	NA
I_758742	I	758742	0.0317157	PC1	4.05719	0	NA	NA	NA	NA	NA	NA	NA	NA	NA
I_759719	I	759719	0.352991	PC1	4.05719	0	NA	NA	NA	NA	NA	NA	NA	NA	NA
I_761005	I	761005	0.222288	PC1	4.05719	0	NA	NA	NA	NA	NA	NA	NA	NA	NA
I_761505	I	761505	1.46347	PC1	4.05719	0	NA	NA	NA	NA	NA	NA	NA	NA	NA
I_762136	I	762136	0.171223	PC1	4.05719	0	NA	NA	NA	NA	NA	NA	NA	NA	NA
I_765084	I	765084	0.474726	PC1	4.05719	0	NA	NA	NA	NA	NA	NA	NA	NA	NA
I_770653	I	770653	0.107288	PC1	4.05719	0	NA	NA	NA	NA	NA	NA	NA	NA	NA
I_771745	I	771745	0.586644	PC1	4.05719	0	NA	NA	NA	NA	NA	NA	NA	NA	NA
I_772388	I	772388	0.547029	PC1	4.05719	0	NA	NA	NA	NA	NA	NA	NA	NA	NA
I_775524	I	775524	0.383156	PC1	4.05719	0	NA	NA	NA	NA	NA	NA	NA	NA	NA
I_776122	I	776122	0.237132	PC1	4.05719	0	NA	NA	NA	NA	NA	NA	NA	NA	NA
I_777407	I	777407	0.469424	PC1	4.05719	0	NA	NA	NA	NA	NA	NA	NA	NA	NA
I_779597	I	779597	1.16708	PC1	4.05719	0	NA	NA	NA	NA	NA	NA	NA	NA	NA
I_781111	I	781111	0.914957	PC1	4.05719	0	NA	NA	NA	NA	NA	NA	NA	NA	NA
I_781671	I	781671	0.424162	PC1	4.05719	0	NA	NA	NA	NA	NA	NA	NA	NA	NA
I_786273	I	786273	0.222288	PC1	4.05719	0	NA	NA	NA	NA	NA	NA	NA	NA	NA
I_787613	I	787613	0.461002	PC1	4.05719	0	NA	NA	NA	NA	NA	NA	NA	NA	NA
I_788966	I	788966	0.474726	PC1	4.05719	0	NA	NA	NA	NA	NA	NA	NA	NA	NA
I_789639	I	789639	1.16708	PC1	4.05719	0	NA	NA	NA	NA	NA	NA	NA	NA	NA
I_792995	I	792995	0.914957	PC1	4.05719	0	NA	NA	NA	NA	NA	NA	NA	NA	NA
I_793480	I	793480	0.469424	PC1	4.05719	0	NA	NA	NA	NA	NA	NA	NA	NA	NA
I_794211	I	794211	0.0207983	PC1	4.05719	0	NA	NA	NA	NA	NA	NA	NA	NA	NA
I_799041	I	799041	0.638207	PC1	4.05719	0	NA	NA	NA	NA	NA	NA	NA	NA	NA
I_804004	I	804004	0.474726	PC1	4.05719	0	NA	NA	NA	NA	NA	NA	NA	NA	NA
I_804241	I	804241	0.60325	PC1	4.05719	0	NA	NA	NA	NA	NA	NA	NA	NA	NA
I_805361	I	805361	0.343488	PC1	4.05719	0	NA	NA	NA	NA	NA	NA	NA	NA	NA
I_807504	I	807504	1.78512	PC1	4.05719	0	NA	NA	NA	NA	NA	NA	NA	NA	NA
I_810217	I	810217	0.351012	PC1	4.05719	0	NA	NA	NA	NA	NA	NA	NA	NA	NA
I_811002	I	811002	0.0317157	PC1	4.05719	0	NA	NA	NA	NA	NA	NA	NA	NA	NA
I_812066	I	812066	0.914957	PC1	4.05719	0	NA	NA	NA	NA	NA	NA	NA	NA	NA
I_814139	I	814139	0.151589	PC1	4.05719	0	NA	NA	NA	NA	NA	NA	NA	NA	NA
I_822963	I	822963	0.494607	PC1	4.05719	0	NA	NA	NA	NA	NA	NA	NA	NA	NA
I_824619	I	824619	0.368536	PC1	4.05719	0	NA	NA	NA	NA	NA	NA	NA	NA	NA
I_826970	I	826970	0.156914	PC1	4.05719	0	NA	NA	NA	NA	NA	NA	NA	NA	NA
I_830484	I	830484	0.090956	PC1	4.05719	0	NA	NA	NA	NA	NA	NA	NA	NA	NA
I_835999	I	835999	0.495405	PC1	4.05719	0	NA	NA	NA	NA	NA	NA	NA	NA	NA
I_837659	I	837659	0.42792	PC1	4.05719	0	NA	NA	NA	NA	NA	NA	NA	NA	NA
I_839222	I	839222	0.768449	PC1	4.05719	0	NA	NA	NA	NA	NA	NA	NA	NA	NA
I_839567	I	839567	0.914957	PC1	4.05719	0	NA	NA	NA	NA	NA	NA	NA	NA	NA
I_839931	I	839931	1.32648	PC1	4.05719	0	NA	NA	NA	NA	NA	NA	NA	NA	NA
I_846665	I	846665	0.00985866	PC1	4.05719	0	NA	NA	NA	NA	NA	NA	NA	NA	NA
I_847650	I	847650	0.0313778	PC1	4.05719	0	NA	NA	NA	NA	NA	NA	NA	NA	NA
I_848207	I	848207	0.0726998	PC1	4.05719	0	NA	NA	NA	NA	NA	NA	NA	NA	NA
I_850499	I	850499	0.532192	PC1	4.05719	0	NA	NA	NA	NA	NA	NA	NA	NA	NA
I_850992	I	850992	0.222288	PC1	4.05719	0	NA	NA	NA	NA	NA	NA	NA	NA	NA
I_852228	I	852228	0.141455	PC1	4.05719	0	NA	NA	NA	NA	NA	NA	NA	NA	NA
I_861672	I	861672	0.0431542	PC1	4.05719	0	NA	NA	NA	NA	NA	NA	NA	NA	NA
I_863741	I	863741	0.134654	PC1	4.05719	0	NA	NA	NA	NA	NA	NA	NA	NA	NA
I_876547	I	876547	0.318964	PC1	4.05719	0	NA	NA	NA	NA	NA	NA	NA	NA	NA
I_877144	I	877144	0.658064	PC1	4.05719	0	NA	NA	NA	NA	NA	NA	NA	NA	NA
I_877864	I	877864	0.198281	PC1	4.05719	0	NA	NA	NA	NA	NA	NA	NA	NA	NA
I_877962	I	877962	0.17877	PC1	4.05719	0	NA	NA	NA	NA	NA	NA	NA	NA	NA
I_880114	I	880114	0.167821	PC1	4.05719	0	NA	NA	NA	NA	NA	NA	NA	NA	NA
I_880852	I	880852	0.757741	PC1	4.05719	0	NA	NA	NA	NA	NA	NA	NA	NA	NA
I_883079	I	883079	0.0159418	PC1	4.05719	0	NA	NA	NA	NA	NA	NA	NA	NA	NA
I_884389	I	884389	0.373503	PC1	4.05719	0	NA	NA	NA	NA	NA	NA	NA	NA	NA
I_886974	I	886974	0.109852	PC1	4.05719	0	NA	NA	NA	NA	NA	NA	NA	NA	NA
I_888488	I	888488	0.273529	PC1	4.05719	0	NA	NA	NA	NA	NA	NA	NA	NA	NA
I_895059	I	895059	0.369019	PC1	4.05719	0	NA	NA	NA	NA	NA	NA	NA	NA	NA
I_912022	I	912022	0.281466	PC1	4.05719	0	NA	NA	NA	NA	NA	NA	NA	NA	NA
I_912890	I	912890	0.289323	PC1	4.05719	0	NA	NA	NA	NA	NA	NA	NA	NA	NA
I_913928	I	913928	0.0747194	PC1	4.05719	0	NA	NA	NA	NA	NA	NA	NA	NA	NA
I_916826	I	916826	0.164242	PC1	4.05719	0	NA	NA	NA	NA	NA	NA	NA	NA	NA
I_919967	I	919967	0.355586	PC1	4.05719	0	NA	NA	NA	NA	NA	NA	NA	NA	NA
I_921703	I	921703	0.65057	PC1	4.05719	0	NA	NA	NA	NA	NA	NA	NA	NA	NA
I_922115	I	922115	0.480657	PC1	4.05719	0	NA	NA	NA	NA	NA	NA	NA	NA	NA
I_927179	I	927179	0.404672	PC1	4.05719	0	NA	NA	NA	NA	NA	NA	NA	NA	NA
I_928600	I	928600	0.385796	PC1	4.05719	0	NA	NA	NA	NA	NA	NA	NA	NA	NA
I_935051	I	935051	0.445217	PC1	4.05719	0	NA	NA	NA	NA	NA	NA	NA	NA	NA
I_935443	I	935443	0.0296731	PC1	4.05719	0	NA	NA	NA	NA	NA	NA	NA	NA	NA
I_937541	I	937541	0.101093	PC1	4.05719	0	NA	NA	NA	NA	NA	NA	NA	NA	NA
I_944827	I	944827	0.10817	PC1	4.05719	0	NA	NA	NA	NA	NA	NA	NA	NA	NA
I_946888	I	946888	0.373503	PC1	4.05719	0	NA	NA	NA	NA	NA	NA	NA	NA	NA
I_947546	I	947546	0.17853	PC1	4.05719	0	NA	NA	NA	NA	NA	NA	NA	NA	NA
I_948048	I	948048	0.658064	PC1	4.05719	0	NA	NA	NA	NA	NA	NA	NA	NA	NA
I_948941	I	948941	0.260003	PC1	4.05719	0	NA	NA	NA	NA	NA	NA	NA	NA	NA
I_949953	I	949953	0.55182	PC1	4.05719	0	NA	NA	NA	NA	NA	NA	NA	NA	NA
I_950813	I	950813	0.0382848	PC1	4.05719	0	NA	NA	NA	NA	NA	NA	NA	NA	NA
I_951158	I	951158	0.599664	PC1	4.05719	0	NA	NA	NA	NA	NA	NA	NA	NA	NA
I_951190	I	951190	0.0350841	PC1	4.05719	0	NA	NA	NA	NA	NA	NA	NA	NA	NA
I_952797	I	952797	0.517353	PC1	4.05719	0	NA	NA	NA	NA	NA	NA	NA	NA	NA
I_956650	I	956650	0.369577	PC1	4.05719	0	NA	NA	NA	NA	NA	NA	NA	NA	NA
I_960324	I	960324	0.222911	PC1	4.05719	0	NA	NA	NA	NA	NA	NA	NA	NA	NA
I_960976	I	960976	0.268126	PC1	4.05719	0	NA	NA	NA	NA	NA	NA	NA	NA	NA
I_963310	I	963310	0.0302154	PC1	4.05719	0	NA	NA	NA	NA	NA	NA	NA	NA	NA
I_966291	I	966291	0.233599	PC1	4.05719	0	NA	NA	NA	NA	NA	NA	NA	NA	NA
I_969001	I	969001	0.0443308	PC1	4.05719	0	NA	NA	NA	NA	NA	NA	NA	NA	NA
I_970355	I	970355	0.0224333	PC1	4.05719	0	NA	NA	NA	NA	NA	NA	NA	NA	NA
I_973119	I	973119	0.371718	PC1	4.05719	0	NA	NA	NA	NA	NA	NA	NA	NA	NA
I_973423	I	973423	0.1689	PC1	4.05719	0	NA	NA	NA	NA	NA	NA	NA	NA	NA
I_974917	I	974917	0.560801	PC1	4.05719	0	NA	NA	NA	NA	NA	NA	NA	NA	NA
I_975649	I	975649	0.573117	PC1	4.05719	0	NA	NA	NA	NA	NA	NA	NA	NA	NA
I_978053	I	978053	0.373503	PC1	4.05719	0	NA	NA	NA	NA	NA	NA	NA	NA	NA
I_978936	I	978936	0.694812	PC1	4.05719	0	NA	NA	NA	NA	NA	NA	NA	NA	NA
I_979072	I	979072	0.351012	PC1	4.05719	0	NA	NA	NA	NA	NA	NA	NA	NA	NA
I_981568	I	981568	0.79443	PC1	4.05719	0	NA	NA	NA	NA	NA	NA	NA	NA	NA
I_981869	I	981869	0.846806	PC1	4.05719	0	NA	NA	NA	NA	NA	NA	NA	NA	NA
I_982821	I	982821	0.146144	PC1	4.05719	0	NA	NA	NA	NA	NA	NA	NA	NA	NA
I_984961	I	984961	0.824505	PC1	4.05719	0	NA	NA	NA	NA	NA	NA	NA	NA	NA
I_986279	I	986279	0.53221	PC1	4.05719	0	NA	NA	NA	NA	NA	NA	NA	NA	NA
I_987047	I	987047	0.10817	PC1	4.05719	0	NA	NA	NA	NA	NA	NA	NA	NA	NA
I_988411	I	988411	0.0892055	PC1	4.05719	0	NA	NA	NA	NA	NA	NA	NA	NA	NA
I_989221	I	989221	1.0028	PC1	4.05719	0	NA	NA	NA	NA	NA	NA	NA	NA	NA
I_989350	I	989350	0.373503	PC1	4.05719	0	NA	NA	NA	NA	NA	NA	NA	NA	NA
I_990149	I	990149	0.301032	PC1	4.05719	0	NA	NA	NA	NA	NA	NA	NA	NA	NA
I_990428	I	990428	0.617798	PC1	4.05719	0	NA	NA	NA	NA	NA	NA	NA	NA	NA
I_992266	I	992266	0.680841	PC1	4.05719	0	NA	NA	NA	NA	NA	NA	NA	NA	NA
I_992525	I	992525	0.353132	PC1	4.05719	0	NA	NA	NA	NA	NA	NA	NA	NA	NA
I_993217	I	993217	0.275656	PC1	4.05719	0	NA	NA	NA	NA	NA	NA	NA	NA	NA
I_993558	I	993558	0.846806	PC1	4.05719	0	NA	NA	NA	NA	NA	NA	NA	NA	NA
I_993801	I	993801	0.804441	PC1	4.05719	0	NA	NA	NA	NA	NA	NA	NA	NA	NA
I_995078	I	995078	0.843543	PC1	4.05719	0	NA	NA	NA	NA	NA	NA	NA	NA	NA
I_995246	I	995246	0.79443	PC1	4.05719	0	NA	NA	NA	NA	NA	NA	NA	NA	NA
I_997636	I	997636	0.554348	PC1	4.05719	0	NA	NA	NA	NA	NA	NA	NA	NA	NA
I_999180	I	999180	0.329983	PC1	4.05719	0	NA	NA	NA	NA	NA	NA	NA	NA	NA
I_999709	I	999709	0.351012	PC1	4.05719	0	NA	NA	NA	NA	NA	NA	NA	NA	NA
I_999997	I	999997	0.252591	PC1	4.05719	0	NA	NA	NA	NA	NA	NA	NA	NA	NA
I_1003648	I	1003648	0.275656	PC1	4.05719	0	NA	NA	NA	NA	NA	NA	NA	NA	NA
I_1009750	I	1009750	0.303984	PC1	4.05719	0	NA	NA	NA	NA	NA	NA	NA	NA	NA
I_1010086	I	1010086	0.129637	PC1	4.05719	0	NA	NA	NA	NA	NA	NA	NA	NA	NA
I_1011098	I	1011098	0.373503	PC1	4.05719	0	NA	NA	NA	NA	NA	NA	NA	NA	NA
I_1011169	I	1011169	0.617798	PC1	4.05719	0	NA	NA	NA	NA	NA	NA	NA	NA	NA
I_1011734	I	1011734	0.366184	PC1	4.05719	0	NA	NA	NA	NA	NA	NA	NA	NA	NA
I_1013732	I	1013732	0.317589	PC1	4.05719	0	NA	NA	NA	NA	NA	NA	NA	NA	NA
I_1015443	I	1015443	0.0211338	PC1	4.05719	0	NA	NA	NA	NA	NA	NA	NA	NA	NA
I_1015933	I	1015933	0.160913	PC1	4.05719	0	NA	NA	NA	NA	NA	NA	NA	NA	NA
I_1016104	I	1016104	0.79443	PC1	4.05719	0	NA	NA	NA	NA	NA	NA	NA	NA	NA
I_1024526	I	1024526	0.105491	PC1	4.05719	0	NA	NA	NA	NA	NA	NA	NA	NA	NA
I_1029658	I	1029658	0.351616	PC1	4.05719	0	NA	NA	NA	NA	NA	NA	NA	NA	NA
I_1030895	I	1030895	0.350359	PC1	4.05719	0	NA	NA	NA	NA	NA	NA	NA	NA	NA
I_1031227	I	1031227	0.148366	PC1	4.05719	0	NA	NA	NA	NA	NA	NA	NA	NA	NA
I_1032796	I	1032796	0.073117	PC1	4.05719	0	NA	NA	NA	NA	NA	NA	NA	NA	NA
I_1033250	I	1033250	0.793684	PC1	4.05719	0	NA	NA	NA	NA	NA	NA	NA	NA	NA
I_1034314	I	1034314	0.85821	PC1	4.05719	0	NA	NA	NA	NA	NA	NA	NA	NA	NA
I_1034769	I	1034769	0.317589	PC1	4.05719	0	NA	NA	NA	NA	NA	NA	NA	NA	NA
I_1038911	I	1038911	0.0135708	PC1	4.05719	0	NA	NA	NA	NA	NA	NA	NA	NA	NA
I_1039472	I	1039472	0.122103	PC1	4.05719	0	NA	NA	NA	NA	NA	NA	NA	NA	NA
I_1041802	I	1041802	0.408616	PC1	4.05719	0	NA	NA	NA	NA	NA	NA	NA	NA	NA
I_1043712	I	1043712	0.474726	PC1	4.05719	0	NA	NA	NA	NA	NA	NA	NA	NA	NA
I_1050147	I	1050147	0.79443	PC1	4.05719	0	NA	NA	NA	NA	NA	NA	NA	NA	NA
I_1050613	I	1050613	0.0366058	PC1	4.05719	0	NA	NA	NA	NA	NA	NA	NA	NA	NA
I_1050624	I	1050624	0.133208	PC1	4.05719	0	NA	NA	NA	NA	NA	NA	NA	NA	NA
I_1052566	I	1052566	0.793775	PC1	4.05719	0	NA	NA	NA	NA	NA	NA	NA	NA	NA
I_1053646	I	1053646	1.0471	PC1	4.05719	0	NA	NA	NA	NA	NA	NA	NA	NA	NA
I_1054275	I	1054275	0.226417	PC1	4.05719	0	NA	NA	NA	NA	NA	NA	NA	NA	NA
I_1058900	I	1058900	0.472308	PC1	4.05719	0	NA	NA	NA	NA	NA	NA	NA	NA	NA
I_1059258	I	1059258	0.56969	PC1	4.05719	0	NA	NA	NA	NA	NA	NA	NA	NA	NA
I_1059264	I	1059264	0.0334895	PC1	4.05719	0	NA	NA	NA	NA	NA	NA	NA	NA	NA
I_1059600	I	1059600	0.288778	PC1	4.05719	0	NA	NA	NA	NA	NA	NA	NA	NA	NA
I_1062436	I	1062436	0.0425544	PC1	4.05719	0	NA	NA	NA	NA	NA	NA	NA	NA	NA
I_1062730	I	1062730	0.382414	PC1	4.05719	0	NA	NA	NA	NA	NA	NA	NA	NA	NA
I_1064437	I	1064437	1.33255	PC1	4.05719	0	NA	NA	NA	NA	NA	NA	NA	NA	NA
I_1064448	I	1064448	0.208605	PC1	4.05719	0	NA	NA	NA	NA	NA	NA	NA	NA	NA
I_1064922	I	1064922	0.0541169	PC1	4.05719	0	NA	NA	NA	NA	NA	NA	NA	NA	NA
I_1066614	I	1066614	0.317589	PC1	4.05719	0	NA	NA	NA	NA	NA	NA	NA	NA	NA
I_1068572	I	1068572	0.579829	PC1	4.05719	0	NA	NA	NA	NA	NA	NA	NA	NA	NA
I_1069226	I	1069226	0.168733	PC1	4.05719	0	NA	NA	NA	NA	NA	NA	NA	NA	NA
I_1071327	I	1071327	0.382166	PC1	4.05719	0	NA	NA	NA	NA	NA	NA	NA	NA	NA
I_1071437	I	1071437	0.210414	PC1	4.05719	0	NA	NA	NA	NA	NA	NA	NA	NA	NA
I_1072123	I	1072123	0.0875654	PC1	4.05719	0	NA	NA	NA	NA	NA	NA	NA	NA	NA
I_1073789	I	1073789	0.0608523	PC1	4.05719	0	NA	NA	NA	NA	NA	NA	NA	NA	NA
I_1073820	I	1073820	0.169807	PC1	4.05719	0	NA	NA	NA	NA	NA	NA	NA	NA	NA
I_1074459	I	1074459	0.0425544	PC1	4.05719	0	NA	NA	NA	NA	NA	NA	NA	NA	NA
I_1086290	I	1086290	1.89739	PC1	4.05719	0	NA	NA	NA	NA	NA	NA	NA	NA	NA
I_1086755	I	1086755	0.436626	PC1	4.05719	0	NA	NA	NA	NA	NA	NA	NA	NA	NA
I_1086960	I	1086960	1.33255	PC1	4.05719	0	NA	NA	NA	NA	NA	NA	NA	NA	NA
I_1088775	I	1088775	0.70957	PC1	4.05719	0	NA	NA	NA	NA	NA	NA	NA	NA	NA
I_1089080	I	1089080	0.341331	PC1	4.05719	0	NA	NA	NA	NA	NA	NA	NA	NA	NA
I_1089763	I	1089763	0.284643	PC1	4.05719	0	NA	NA	NA	NA	NA	NA	NA	NA	NA
I_1090252	I	1090252	0.077719	PC1	4.05719	0	NA	NA	NA	NA	NA	NA	NA	NA	NA
I_1091251	I	1091251	0.579829	PC1	4.05719	0	NA	NA	NA	NA	NA	NA	NA	NA	NA
I_1096611	I	1096611	0.476312	PC1	4.05719	0	NA	NA	NA	NA	NA	NA	NA	NA	NA
I_1099042	I	1099042	1.02491	PC1	4.05719	0	NA	NA	NA	NA	NA	NA	NA	NA	NA
I_1099355	I	1099355	1.05401	PC1	4.05719	0	NA	NA	NA	NA	NA	NA	NA	NA	NA
I_1099520	I	1099520	0.0382848	PC1	4.05719	0	NA	NA	NA	NA	NA	NA	NA	NA	NA
I_1099714	I	1099714	0.689763	PC1	4.05719	0	NA	NA	NA	NA	NA	NA	NA	NA	NA
I_1101583	I	1101583	0.0345403	PC1	4.05719	0	NA	NA	NA	NA	NA	NA	NA	NA	NA
I_1103626	I	1103626	0.211109	PC1	4.05719	0	NA	NA	NA	NA	NA	NA	NA	NA	NA
I_1104819	I	1104819	0.0425544	PC1	4.05719	0	NA	NA	NA	NA	NA	NA	NA	NA	NA
I_1105334	I	1105334	0.108125	PC1	4.05719	0	NA	NA	NA	NA	NA	NA	NA	NA	NA
I_1106869	I	1106869	0.0875597	PC1	4.05719	0	NA	NA	NA	NA	NA	NA	NA	NA	NA
I_1109795	I	1109795	0.315354	PC1	4.05719	0	NA	NA	NA	NA	NA	NA	NA	NA	NA
I_1109928	I	1109928	0.49628	PC1	4.05719	0	NA	NA	NA	NA	NA	NA	NA	NA	NA
I_1109958	I	1109958	0.297037	PC1	4.05719	0	NA	NA	NA	NA	NA	NA	NA	NA	NA
I_1110833	I	1110833	0.562569	PC1	4.05719	0	NA	NA	NA	NA	NA	NA	NA	NA	NA
I_1112137	I	1112137	0.0425544	PC1	4.05719	0	NA	NA	NA	NA	NA	NA	NA	NA	NA
I_1116323	I	1116323	0.315727	PC1	4.05719	0	NA	NA	NA	NA	NA	NA	NA	NA	NA
I_1116425	I	1116425	0.211109	PC1	4.05719	0	NA	NA	NA	NA	NA	NA	NA	NA	NA
I_1116473	I	1116473	0.45474	PC1	4.05719	0	NA	NA	NA	NA	NA	NA	NA	NA	NA
I_1126255	I	1126255	0.40685	PC1	4.05719	0	NA	NA	NA	NA	NA	NA	NA	NA	NA
I_1128769	I	1128769	0.546304	PC1	4.05719	0	NA	NA	NA	NA	NA	NA	NA	NA	NA
I_1128847	I	1128847	0.533501	PC1	4.05719	0	NA	NA	NA	NA	NA	NA	NA	NA	NA
I_1128850	I	1128850	0.0171475	PC1	4.05719	0	NA	NA	NA	NA	NA	NA	NA	NA	NA
I_1128934	I	1128934	1.82875	PC1	4.05719	0	NA	NA	NA	NA	NA	NA	NA	NA	NA
I_1129124	I	1129124	0.0425544	PC1	4.05719	0	NA	NA	NA	NA	NA	NA	NA	NA	NA
I_1129483	I	1129483	0.721862	PC1	4.05719	0	NA	NA	NA	NA	NA	NA	NA	NA	NA
I_1129606	I	1129606	0.339515	PC1	4.05719	0	NA	NA	NA	NA	NA	NA	NA	NA	NA
I_1130709	I	1130709	0.491432	PC1	4.05719	0	NA	NA	NA	NA	NA	NA	NA	NA	NA
I_1131409	I	1131409	1.01702	PC1	4.05719	0	NA	NA	NA	NA	NA	NA	NA	NA	NA
I_1132440	I	1132440	0.0244958	PC1	4.05719	0	NA	NA	NA	NA	NA	NA	NA	NA	NA
I_1135670	I	1135670	0.420689	PC1	4.05719	0	NA	NA	NA	NA	NA	NA	NA	NA	NA
I_1137830	I	1137830	1.26038	PC1	4.05719	0	NA	NA	NA	NA	NA	NA	NA	NA	NA
I_1137920	I	1137920	0.693131	PC1	4.05719	0	NA	NA	NA	NA	NA	NA	NA	NA	NA
I_1138018	I	1138018	0.0424465	PC1	4.05719	0	NA	NA	NA	NA	NA	NA	NA	NA	NA
I_1138155	I	1138155	0.510321	PC1	4.05719	0	NA	NA	NA	NA	NA	NA	NA	NA	NA
I_1139786	I	1139786	0.156162	PC1	4.05719	0	NA	NA	NA	NA	NA	NA	NA	NA	NA
I_1139937	I	1139937	0.546304	PC1	4.05719	0	NA	NA	NA	NA	NA	NA	NA	NA	NA
I_1139949	I	1139949	0.084189	PC1	4.05719	0	NA	NA	NA	NA	NA	NA	NA	NA	NA
I_1139951	I	1139951	1.17443	PC1	4.05719	0	NA	NA	NA	NA	NA	NA	NA	NA	NA
I_1140126	I	1140126	0.00996472	PC1	4.05719	0	NA	NA	NA	NA	NA	NA	NA	NA	NA
I_1140583	I	1140583	0.582843	PC1	4.05719	0	NA	NA	NA	NA	NA	NA	NA	NA	NA
I_1140712	I	1140712	0.533501	PC1	4.05719	0	NA	NA	NA	NA	NA	NA	NA	NA	NA
I_1140724	I	1140724	0.965616	PC1	4.05719	0	NA	NA	NA	NA	NA	NA	NA	NA	NA
I_1140819	I	1140819	0.700106	PC1	4.05719	0	NA	NA	NA	NA	NA	NA	NA	NA	NA
I_1141158	I	1141158	0.695965	PC1	4.05719	0	NA	NA	NA	NA	NA	NA	NA	NA	NA
I_1141367	I	1141367	0.609438	PC1	4.05719	0	NA	NA	NA	NA	NA	NA	NA	NA	NA
I_1142129	I	1142129	0.267953	PC1	4.05719	0	NA	NA	NA	NA	NA	NA	NA	NA	NA
I_1146833	I	1146833	0.0130519	PC1	4.05719	0	NA	NA	NA	NA	NA	NA	NA	NA	NA
I_1148193	I	1148193	0.0359666	PC1	4.05719	0	NA	NA	NA	NA	NA	NA	NA	NA	NA
I_1149835	I	1149835	0.0653603	PC1	4.05719	0	NA	NA	NA	NA	NA	NA	NA	NA	NA
I_1149912	I	1149912	0.55886	PC1	4.05719	0	NA	NA	NA	NA	NA	NA	NA	NA	NA
I_1154232	I	1154232	0.882077	PC1	4.05719	0	NA	NA	NA	NA	NA	NA	NA	NA	NA
I_1154971	I	1154971	0.481712	PC1	4.05719	0	NA	NA	NA	NA	NA	NA	NA	NA	NA
I_1155325	I	1155325	0.232092	PC1	4.05719	0	NA	NA	NA	NA	NA	NA	NA	NA	NA
I_1156492	I	1156492	0.546304	PC1	4.05719	0	NA	NA	NA	NA	NA	NA	NA	NA	NA
I_1156845	I	1156845	0.695965	PC1	4.05719	0	NA	NA	NA	NA	NA	NA	NA	NA	NA
I_1157254	I	1157254	1.54654	PC1	4.05719	0	NA	NA	NA	NA	NA	NA	NA	NA	NA
I_1159684	I	1159684	0.339163	PC1	4.05719	0	NA	NA	NA	NA	NA	NA	NA	NA	NA
I_1161993	I	1161993	1.61491	PC1	4.05719	0	NA	NA	NA	NA	NA	NA	NA	NA	NA
I_1165498	I	1165498	0.769393	PC1	4.05719	0	NA	NA	NA	NA	NA	NA	NA	NA	NA
I_1165831	I	1165831	0.827641	PC1	4.05719	0	NA	NA	NA	NA	NA	NA	NA	NA	NA
I_1166098	I	1166098	0.0706982	PC1	4.05719	0	NA	NA	NA	NA	NA	NA	NA	NA	NA
I_1166270	I	1166270	0.97579	PC1	4.05719	0	NA	NA	NA	NA	NA	NA	NA	NA	NA
I_1166365	I	1166365	0.106811	PC1	4.05719	0	NA	NA	NA	NA	NA	NA	NA	NA	NA
I_1169002	I	1169002	0.111174	PC1	4.05719	0	NA	NA	NA	NA	NA	NA	NA	NA	NA
I_1169040	I	1169040	0.385893	PC1	4.05719	0	NA	NA	NA	NA	NA	NA	NA	NA	NA
I_1175600	I	1175600	0.495405	PC1	4.05719	0	NA	NA	NA	NA	NA	NA	NA	NA	NA
I_1176473	I	1176473	0.546304	PC1	4.05719	0	NA	NA	NA	NA	NA	NA	NA	NA	NA
I_1178087	I	1178087	0.0651409	PC1	4.05719	0	NA	NA	NA	NA	NA	NA	NA	NA	NA
I_1178132	I	1178132	0.00425939	PC1	4.05719	0	NA	NA	NA	NA	NA	NA	NA	NA	NA
I_1178358	I	1178358	0.539632	PC1	4.05719	0	NA	NA	NA	NA	NA	NA	NA	NA	NA
I_1179424	I	1179424	0.354415	PC1	4.05719	0	NA	NA	NA	NA	NA	NA	NA	NA	NA
I_1180974	I	1180974	0.229563	PC1	4.05719	0	NA	NA	NA	NA	NA	NA	NA	NA	NA
I_1181220	I	1181220	0.192757	PC1	4.05719	0	NA	NA	NA	NA	NA	NA	NA	NA	NA
I_1182911	I	1182911	0.605499	PC1	4.05719	0	NA	NA	NA	NA	NA	NA	NA	NA	NA
I_1184704	I	1184704	0.197995	PC1	4.05719	0	NA	NA	NA	NA	NA	NA	NA	NA	NA
I_1184847	I	1184847	0.912957	PC1	4.05719	0	NA	NA	NA	NA	NA	NA	NA	NA	NA
I_1185263	I	1185263	0.339216	PC1	4.05719	0	NA	NA	NA	NA	NA	NA	NA	NA	NA
I_1185646	I	1185646	1.655	PC1	4.05719	0	NA	NA	NA	NA	NA	NA	NA	NA	NA
I_1185697	I	1185697	0.495172	PC1	4.05719	0	NA	NA	NA	NA	NA	NA	NA	NA	NA
I_1189370	I	1189370	0.464778	PC1	4.05719	0	NA	NA	NA	NA	NA	NA	NA	NA	NA
I_1198493	I	1198493	0.215375	PC1	4.05719	0	NA	NA	NA	NA	NA	NA	NA	NA	NA
I_1198656	I	1198656	0.112942	PC1	4.05719	0	NA	NA	NA	NA	NA	NA	NA	NA	NA
I_1199049	I	1199049	0.0306525	PC1	4.05719	0	NA	NA	NA	NA	NA	NA	NA	NA	NA
I_1199350	I	1199350	0.0185126	PC1	4.05719	0	NA	NA	NA	NA	NA	NA	NA	NA	NA
I_1199489	I	1199489	0.41298	PC1	4.05719	0	NA	NA	NA	NA	NA	NA	NA	NA	NA
I_1200105	I	1200105	0.659987	PC1	4.05719	0	NA	NA	NA	NA	NA	NA	NA	NA	NA
I_1200256	I	1200256	0.0289404	PC1	4.05719	0	NA	NA	NA	NA	NA	NA	NA	NA	NA
I_1200305	I	1200305	1.14003	PC1	4.05719	0	NA	NA	NA	NA	NA	NA	NA	NA	NA
I_1200509	I	1200509	0.0370973	PC1	4.05719	0	NA	NA	NA	NA	NA	NA	NA	NA	NA
I_1210926	I	1210926	0.325831	PC1	4.05719	0	NA	NA	NA	NA	NA	NA	NA	NA	NA
I_1211149	I	1211149	0.0432193	PC1	4.05719	0	NA	NA	NA	NA	NA	NA	NA	NA	NA
I_1211278	I	1211278	0.486698	PC1	4.05719	0	NA	NA	NA	NA	NA	NA	NA	NA	NA
I_1211383	I	1211383	0.463579	PC1	4.05719	0	NA	NA	NA	NA	NA	NA	NA	NA	NA
I_1212674	I	1212674	0.577714	PC1	4.05719	0	NA	NA	NA	NA	NA	NA	NA	NA	NA
I_1218700	I	1218700	0.562569	PC1	4.05719	0	NA	NA	NA	NA	NA	NA	NA	NA	NA
I_1218959	I	1218959	0.736995	PC1	4.05719	0	NA	NA	NA	NA	NA	NA	NA	NA	NA
I_1219399	I	1219399	0.134041	PC1	4.05719	0	NA	NA	NA	NA	NA	NA	NA	NA	NA
I_1221084	I	1221084	0.10684	PC1	4.05719	0	NA	NA	NA	NA	NA	NA	NA	NA	NA
I_1221128	I	1221128	0.200163	PC1	4.05719	0	NA	NA	NA	NA	NA	NA	NA	NA	NA
I_1222574	I	1222574	0.069508	PC1	4.05719	0	NA	NA	NA	NA	NA	NA	NA	NA	NA
I_1224025	I	1224025	0.687876	PC1	4.05719	0	NA	NA	NA	NA	NA	NA	NA	NA	NA
I_1224377	I	1224377	0.0820441	PC1	4.05719	0	NA	NA	NA	NA	NA	NA	NA	NA	NA
I_1224387	I	1224387	0.0905107	PC1	4.05719	0	NA	NA	NA	NA	NA	NA	NA	NA	NA
I_1226107	I	1226107	0.131356	PC1	4.05719	0	NA	NA	NA	NA	NA	NA	NA	NA	NA
I_1226928	I	1226928	0.191845	PC1	4.05719	0	NA	NA	NA	NA	NA	NA	NA	NA	NA
I_1228585	I	1228585	0.327876	PC1	4.05719	0	NA	NA	NA	NA	NA	NA	NA	NA	NA
I_1228789	I	1228789	0.14956	PC1	4.05719	0	NA	NA	NA	NA	NA	NA	NA	NA	NA
I_1229336	I	1229336	0.918238	PC1	4.05719	0	NA	NA	NA	NA	NA	NA	NA	NA	NA
I_1229366	I	1229366	0.489988	PC1	4.05719	0	NA	NA	NA	NA	NA	NA	NA	NA	NA
I_1232339	I	1232339	0.446318	PC1	4.05719	0	NA	NA	NA	NA	NA	NA	NA	NA	NA
I_1233185	I	1233185	1.11585	PC1	4.05719	0	NA	NA	NA	NA	NA	NA	NA	NA	NA
I_1233542	I	1233542	0.689564	PC1	4.05719	0	NA	NA	NA	NA	NA	NA	NA	NA	NA
I_1233659	I	1233659	0.134779	PC1	4.05719	0	NA	NA	NA	NA	NA	NA	NA	NA	NA
I_1234427	I	1234427	0.155615	PC1	4.05719	0	NA	NA	NA	NA	NA	NA	NA	NA	NA
I_1234526	I	1234526	0.139504	PC1	4.05719	0	NA	NA	NA	NA	NA	NA	NA	NA	NA
I_1234623	I	1234623	0.12715	PC1	4.05719	0	NA	NA	NA	NA	NA	NA	NA	NA	NA
I_1235061	I	1235061	0.704345	PC1	4.05719	0	NA	NA	NA	NA	NA	NA	NA	NA	NA
I_1235189	I	1235189	0.474203	PC1	4.05719	0	NA	NA	NA	NA	NA	NA	NA	NA	NA
I_1235904	I	1235904	0.141593	PC1	4.05719	0	NA	NA	NA	NA	NA	NA	NA	NA	NA
I_1235922	I	1235922	0.0479676	PC1	4.05719	0	NA	NA	NA	NA	NA	NA	NA	NA	NA
I_1236354	I	1236354	0.180583	PC1	4.05719	0	NA	NA	NA	NA	NA	NA	NA	NA	NA
I_1241261	I	1241261	0.430403	PC1	4.05719	0	NA	NA	NA	NA	NA	NA	NA	NA	NA
I_1242025	I	1242025	0.0101296	PC1	4.05719	0	NA	NA	NA	NA	NA	NA	NA	NA	NA
I_1242218	I	1242218	0.0623751	PC1	4.05719	0	NA	NA	NA	NA	NA	NA	NA	NA	NA
I_1243506	I	1243506	0.940167	PC1	4.05719	0	NA	NA	NA	NA	NA	NA	NA	NA	NA
I_1248064	I	1248064	0.638662	PC1	4.05719	0	NA	NA	NA	NA	NA	NA	NA	NA	NA
I_1248624	I	1248624	0.567019	PC1	4.05719	0	NA	NA	NA	NA	NA	NA	NA	NA	NA
I_1248756	I	1248756	0.547841	PC1	4.05719	0	NA	NA	NA	NA	NA	NA	NA	NA	NA
I_1251884	I	1251884	0.0499795	PC1	4.05719	0	NA	NA	NA	NA	NA	NA	NA	NA	NA
I_1253383	I	1253383	0.035555	PC1	4.05719	0	NA	NA	NA	NA	NA	NA	NA	NA	NA
I_1253651	I	1253651	0.433406	PC1	4.05719	0	NA	NA	NA	NA	NA	NA	NA	NA	NA
I_1253769	I	1253769	0.403401	PC1	4.05719	0	NA	NA	NA	NA	NA	NA	NA	NA	NA
I_1254508	I	1254508	0.583388	PC1	4.05719	0	NA	NA	NA	NA	NA	NA	NA	NA	NA
I_1255351	I	1255351	0.430403	PC1	4.05719	0	NA	NA	NA	NA	NA	NA	NA	NA	NA
I_1255416	I	1255416	0.154952	PC1	4.05719	0	NA	NA	NA	NA	NA	NA	NA	NA	NA
I_1255890	I	1255890	0.295914	PC1	4.05719	0	NA	NA	NA	NA	NA	NA	NA	NA	NA
I_1256304	I	1256304	0.0101296	PC1	4.05719	0	NA	NA	NA	NA	NA	NA	NA	NA	NA
I_1256309	I	1256309	0.492672	PC1	4.05719	0	NA	NA	NA	NA	NA	NA	NA	NA	NA
I_1258563	I	1258563	0.0816613	PC1	4.05719	0	NA	NA	NA	NA	NA	NA	NA	NA	NA
I_1258706	I	1258706	0.718745	PC1	4.05719	0	NA	NA	NA	NA	NA	NA	NA	NA	NA
I_1259971	I	1259971	0.440261	PC1	4.05719	0	NA	NA	NA	NA	NA	NA	NA	NA	NA
I_1259986	I	1259986	0.651385	PC1	4.05719	0	NA	NA	NA	NA	NA	NA	NA	NA	NA
I_1260215	I	1260215	0.0156744	PC1	4.05719	0	NA	NA	NA	NA	NA	NA	NA	NA	NA
I_1260822	I	1260822	0.695965	PC1	4.05719	0	NA	NA	NA	NA	NA	NA	NA	NA	NA
I_1261505	I	1261505	0.141455	PC1	4.05719	0	NA	NA	NA	NA	NA	NA	NA	NA	NA
I_1263341	I	1263341	0.00814893	PC1	4.05719	0	NA	NA	NA	NA	NA	NA	NA	NA	NA
I_1266023	I	1266023	1.14793	PC1	4.05719	0	NA	NA	NA	NA	NA	NA	NA	NA	NA
I_1266360	I	1266360	0.430403	PC1	4.05719	0	NA	NA	NA	NA	NA	NA	NA	NA	NA
I_1266499	I	1266499	0.0101296	PC1	4.05719	0	NA	NA	NA	NA	NA	NA	NA	NA	NA
I_1267409	I	1267409	0.33387	PC1	4.05719	0	NA	NA	NA	NA	NA	NA	NA	NA	NA
I_1267574	I	1267574	0.651385	PC1	4.05719	0	NA	NA	NA	NA	NA	NA	NA	NA	NA
I_1269245	I	1269245	0.604487	PC1	4.05719	0	NA	NA	NA	NA	NA	NA	NA	NA	NA
I_1269253	I	1269253	0.16559	PC1	4.05719	0	NA	NA	NA	NA	NA	NA	NA	NA	NA
I_1269603	I	1269603	0.53543	PC1	4.05719	0	NA	NA	NA	NA	NA	NA	NA	NA	NA
I_1269787	I	1269787	0.529981	PC1	4.05719	0	NA	NA	NA	NA	NA	NA	NA	NA	NA
I_1269893	I	1269893	0.154794	PC1	4.05719	0	NA	NA	NA	NA	NA	NA	NA	NA	NA
I_1277122	I	1277122	0.0338823	PC1	4.05719	0	NA	NA	NA	NA	NA	NA	NA	NA	NA
I_1279253	I	1279253	0.0101296	PC1	4.05719	0	NA	NA	NA	NA	NA	NA	NA	NA	NA
I_1281806	I	1281806	0.141593	PC1	4.05719	0	NA	NA	NA	NA	NA	NA	NA	NA	NA
I_1285276	I	1285276	0.153298	PC1	4.05719	0	NA	NA	NA	NA	NA	NA	NA	NA	NA
I_1287631	I	1287631	0.16559	PC1	4.05719	0	NA	NA	NA	NA	NA	NA	NA	NA	NA
I_1292489	I	1292489	0.226319	PC1	4.05719	0	NA	NA	NA	NA	NA	NA	NA	NA	NA
I_1294134	I	1294134	0.430403	PC1	4.05719	0	NA	NA	NA	NA	NA	NA	NA	NA	NA
I_1302732	I	1302732	0.112051	PC1	4.05719	0	NA	NA	NA	NA	NA	NA	NA	NA	NA
I_1305853	I	1305853	0.0101296	PC1	4.05719	0	NA	NA	NA	NA	NA	NA	NA	NA	NA
I_1307439	I	1307439	0.135822	PC1	4.05719	0	NA	NA	NA	NA	NA	NA	NA	NA	NA
I_1308380	I	1308380	0.464556	PC1	4.05719	0	NA	NA	NA	NA	NA	NA	NA	NA	NA
I_1311054	I	1311054	0.362	PC1	4.05719	0	NA	NA	NA	NA	NA	NA	NA	NA	NA
I_1312700	I	1312700	0.33917	PC1	4.05719	0	NA	NA	NA	NA	NA	NA	NA	NA	NA
I_1313019	I	1313019	0.430403	PC1	4.05719	0	NA	NA	NA	NA	NA	NA	NA	NA	NA
I_1319628	I	1319628	0.312458	PC1	4.05719	0	NA	NA	NA	NA	NA	NA	NA	NA	NA
I_1322018	I	1322018	0.0156744	PC1	4.05719	0	NA	NA	NA	NA	NA	NA	NA	NA	NA
I_1323352	I	1323352	0.220584	PC1	4.05719	0	NA	NA	NA	NA	NA	NA	NA	NA	NA
I_1323753	I	1323753	0.0101296	PC1	4.05719	0	NA	NA	NA	NA	NA	NA	NA	NA	NA
I_1326318	I	1326318	0.119142	PC1	4.05719	0	NA	NA	NA	NA	NA	NA	NA	NA	NA
I_1333076	I	1333076	0.110832	PC1	4.05719	0	NA	NA	NA	NA	NA	NA	NA	NA	NA
I_1336302	I	1336302	0.338101	PC1	4.05719	0	NA	NA	NA	NA	NA	NA	NA	NA	NA
I_1337527	I	1337527	0.680897	PC1	4.05719	0	NA	NA	NA	NA	NA	NA	NA	NA	NA
I_1338957	I	1338957	0.424301	PC1	4.05719	0	NA	NA	NA	NA	NA	NA	NA	NA	NA
I_1339689	I	1339689	0.111108	PC1	4.05719	0	NA	NA	NA	NA	NA	NA	NA	NA	NA
I_1345095	I	1345095	0.194703	PC1	4.05719	0	NA	NA	NA	NA	NA	NA	NA	NA	NA
I_1354337	I	1354337	0.187888	PC1	4.05719	0	NA	NA	NA	NA	NA	NA	NA	NA	NA
I_1356011	I	1356011	0.244163	PC1	4.05719	0	NA	NA	NA	NA	NA	NA	NA	NA	NA
I_1358191	I	1358191	0.0763362	PC1	4.05719	0	NA	NA	NA	NA	NA	NA	NA	NA	NA
I_1358450	I	1358450	0.581777	PC1	4.05719	0	NA	NA	NA	NA	NA	NA	NA	NA	NA
I_1359466	I	1359466	0.652629	PC1	4.05719	0	NA	NA	NA	NA	NA	NA	NA	NA	NA
I_1367615	I	1367615	0.865619	PC1	4.05719	0	NA	NA	NA	NA	NA	NA	NA	NA	NA
I_1367896	I	1367896	0.906678	PC1	4.05719	0	NA	NA	NA	NA	NA	NA	NA	NA	NA
I_1377524	I	1377524	0.462161	PC1	4.05719	0	NA	NA	NA	NA	NA	NA	NA	NA	NA
I_1389190	I	1389190	0.0712768	PC1	4.05719	0	NA	NA	NA	NA	NA	NA	NA	NA	NA
I_1392829	I	1392829	0.122082	PC1	4.05719	0	NA	NA	NA	NA	NA	NA	NA	NA	NA
I_1394542	I	1394542	0.0832731	PC1	4.05719	0	NA	NA	NA	NA	NA	NA	NA	NA	NA
I_1394700	I	1394700	0.00622497	PC1	4.05719	0	NA	NA	NA	NA	NA	NA	NA	NA	NA
I_1400363	I	1400363	0.224136	PC1	4.05719	0	NA	NA	NA	NA	NA	NA	NA	NA	NA
I_1400428	I	1400428	0.221261	PC1	4.05719	0	NA	NA	NA	NA	NA	NA	NA	NA	NA
I_1402717	I	1402717	0.00366236	PC1	4.05719	0	NA	NA	NA	NA	NA	NA	NA	NA	NA
I_1405190	I	1405190	0.780017	PC1	4.05719	0	NA	NA	NA	NA	NA	NA	NA	NA	NA
I_1406148	I	1406148	0.15524	PC1	4.05719	0	NA	NA	NA	NA	NA	NA	NA	NA	NA
I_1407455	I	1407455	0.299394	PC1	4.05719	0	NA	NA	NA	NA	NA	NA	NA	NA	NA
I_1410049	I	1410049	0.269037	PC1	4.05719	0	NA	NA	NA	NA	NA	NA	NA	NA	NA
I_1410058	I	1410058	0.118105	PC1	4.05719	0	NA	NA	NA	NA	NA	NA	NA	NA	NA
I_1410067	I	1410067	0.0191176	PC1	4.05719	0	NA	NA	NA	NA	NA	NA	NA	NA	NA
I_1410349	I	1410349	0.0117018	PC1	4.05719	0	NA	NA	NA	NA	NA	NA	NA	NA	NA
I_1415438	I	1415438	0.119663	PC1	4.05719	0	NA	NA	NA	NA	NA	NA	NA	NA	NA
I_1416014	I	1416014	0.107358	PC1	4.05719	0	NA	NA	NA	NA	NA	NA	NA	NA	NA
I_1416044	I	1416044	0.0464778	PC1	4.05719	0	NA	NA	NA	NA	NA	NA	NA	NA	NA
I_1416933	I	1416933	0.247461	PC1	4.05719	0	NA	NA	NA	NA	NA	NA	NA	NA	NA
I_1416955	I	1416955	0.244163	PC1	4.05719	0	NA	NA	NA	NA	NA	NA	NA	NA	NA
I_1420566	I	1420566	0.160859	PC1	4.05719	0	NA	NA	NA	NA	NA	NA	NA	NA	NA
I_1422789	I	1422789	0.0847862	PC1	4.05719	0	NA	NA	NA	NA	NA	NA	NA	NA	NA
I_1425836	I	1425836	0.0842077	PC1	4.05719	0	NA	NA	NA	NA	NA	NA	NA	NA	NA
I_1426048	I	1426048	0.384106	PC1	4.05719	0	NA	NA	NA	NA	NA	NA	NA	NA	NA
I_1427028	I	1427028	0.320132	PC1	4.05719	0	NA	NA	NA	NA	NA	NA	NA	NA	NA
I_1435250	I	1435250	0.770881	PC1	4.05719	0	NA	NA	NA	NA	NA	NA	NA	NA	NA
I_1451070	I	1451070	0.43954	PC1	4.05719	0	NA	NA	NA	NA	NA	NA	NA	NA	NA
I_1459063	I	1459063	0.21273	PC1	4.05719	0	NA	NA	NA	NA	NA	NA	NA	NA	NA
I_1460652	I	1460652	0.477693	PC1	4.05719	0	NA	NA	NA	NA	NA	NA	NA	NA	NA
I_1461251	I	1461251	0.433721	PC1	4.05719	0	NA	NA	NA	NA	NA	NA	NA	NA	NA
I_1466440	I	1466440	0.102832	PC1	4.05719	0	NA	NA	NA	NA	NA	NA	NA	NA	NA
I_1466639	I	1466639	0.0525656	PC1	4.05719	0	NA	NA	NA	NA	NA	NA	NA	NA	NA
I_1480815	I	1480815	0.00709715	PC1	4.05719	0	NA	NA	NA	NA	NA	NA	NA	NA	NA
I_1482176	I	1482176	0.0825942	PC1	4.05719	0	NA	NA	NA	NA	NA	NA	NA	NA	NA
I_1482648	I	1482648	0.161371	PC1	4.05719	0	NA	NA	NA	NA	NA	NA	NA	NA	NA
I_1484843	I	1484843	0.0248527	PC1	4.05719	0	NA	NA	NA	NA	NA	NA	NA	NA	NA
I_1486538	I	1486538	0.164111	PC1	4.05719	0	NA	NA	NA	NA	NA	NA	NA	NA	NA
I_1486672	I	1486672	0.115779	PC1	4.05719	0	NA	NA	NA	NA	NA	NA	NA	NA	NA
I_1486763	I	1486763	0.529402	PC1	4.05719	0	NA	NA	NA	NA	NA	NA	NA	NA	NA
I_1486849	I	1486849	0.574643	PC1	4.05719	0	NA	NA	NA	NA	NA	NA	NA	NA	NA
I_1486876	I	1486876	0.493815	PC1	4.05719	0	NA	NA	NA	NA	NA	NA	NA	NA	NA
I_1490257	I	1490257	0.150281	PC1	4.05719	0	NA	NA	NA	NA	NA	NA	NA	NA	NA
I_1494616	I	1494616	0.244163	PC1	4.05719	0	NA	NA	NA	NA	NA	NA	NA	NA	NA
I_1499182	I	1499182	0.635225	PC1	4.05719	0	NA	NA	NA	NA	NA	NA	NA	NA	NA
I_1503260	I	1503260	0.0890265	PC1	4.05719	0	NA	NA	NA	NA	NA	NA	NA	NA	NA
I_1505366	I	1505366	0.134951	PC1	4.05719	0	NA	NA	NA	NA	NA	NA	NA	NA	NA
I_1510450	I	1510450	0.154853	PC1	4.05719	0	NA	NA	NA	NA	NA	NA	NA	NA	NA
I_1510599	I	1510599	0.318793	PC1	4.05719	0	NA	NA	NA	NA	NA	NA	NA	NA	NA
I_1511208	I	1511208	0.695598	PC1	4.05719	0	NA	NA	NA	NA	NA	NA	NA	NA	NA
I_1512355	I	1512355	0.290008	PC1	4.05719	0	NA	NA	NA	NA	NA	NA	NA	NA	NA
I_1524519	I	1524519	0.280535	PC1	4.05719	0	NA	NA	NA	NA	NA	NA	NA	NA	NA
I_1536288	I	1536288	0.168137	PC1	4.05719	0	NA	NA	NA	NA	NA	NA	NA	NA	NA
I_1536513	I	1536513	0.884784	PC1	4.05719	0	NA	NA	NA	NA	NA	NA	NA	NA	NA
I_1537385	I	1537385	0.189718	PC1	4.05719	0	NA	NA	NA	NA	NA	NA	NA	NA	NA
I_1543438	I	1543438	0.0992177	PC1	4.05719	0	NA	NA	NA	NA	NA	NA	NA	NA	NA
I_1548612	I	1548612	0.0314928	PC1	4.05719	0	NA	NA	NA	NA	NA	NA	NA	NA	NA
I_1549075	I	1549075	0.192651	PC1	4.05719	0	NA	NA	NA	NA	NA	NA	NA	NA	NA
I_1549172	I	1549172	0.0805364	PC1	4.05719	0	NA	NA	NA	NA	NA	NA	NA	NA	NA
I_1550166	I	1550166	0.481599	PC1	4.05719	0	NA	NA	NA	NA	NA	NA	NA	NA	NA
I_1550509	I	1550509	0.432905	PC1	4.05719	0	NA	NA	NA	NA	NA	NA	NA	NA	NA
I_1552630	I	1552630	0.0431104	PC1	4.05719	0	NA	NA	NA	NA	NA	NA	NA	NA	NA
I_1557331	I	1557331	0.66562	PC1	4.05719	0	NA	NA	NA	NA	NA	NA	NA	NA	NA
I_1557541	I	1557541	0.691575	PC1	4.05719	0	NA	NA	NA	NA	NA	NA	NA	NA	NA
I_1557763	I	1557763	0.635225	PC1	4.05719	0	NA	NA	NA	NA	NA	NA	NA	NA	NA
I_1557984	I	1557984	0.349449	PC1	4.05719	0	NA	NA	NA	NA	NA	NA	NA	NA	NA
I_1560477	I	1560477	0.474726	PC1	4.05719	0	NA	NA	NA	NA	NA	NA	NA	NA	NA
I_1562198	I	1562198	0.0637029	PC1	4.05719	0	NA	NA	NA	NA	NA	NA	NA	NA	NA
I_1571268	I	1571268	0.14037	PC1	4.05719	0	NA	NA	NA	NA	NA	NA	NA	NA	NA
I_1572543	I	1572543	0.00707407	PC1	4.05719	0	NA	NA	NA	NA	NA	NA	NA	NA	NA
I_1572898	I	1572898	0.702904	PC1	4.05719	0	NA	NA	NA	NA	NA	NA	NA	NA	NA
I_1573060	I	1573060	0.718863	PC1	4.05719	0	NA	NA	NA	NA	NA	NA	NA	NA	NA
I_1575606	I	1575606	0.144037	PC1	4.05719	0	NA	NA	NA	NA	NA	NA	NA	NA	NA
I_1575836	I	1575836	0.442206	PC1	4.05719	0	NA	NA	NA	NA	NA	NA	NA	NA	NA
I_1580498	I	1580498	0.225301	PC1	4.05719	0	NA	NA	NA	NA	NA	NA	NA	NA	NA
I_1580905	I	1580905	0.107288	PC1	4.05719	0	NA	NA	NA	NA	NA	NA	NA	NA	NA
I_1581701	I	1581701	0.321922	PC1	4.05719	0	NA	NA	NA	NA	NA	NA	NA	NA	NA
I_1583086	I	1583086	0.148842	PC1	4.05719	0	NA	NA	NA	NA	NA	NA	NA	NA	NA
I_1583981	I	1583981	0.128613	PC1	4.05719	0	NA	NA	NA	NA	NA	NA	NA	NA	NA
I_1585637	I	1585637	0.192651	PC1	4.05719	0	NA	NA	NA	NA	NA	NA	NA	NA	NA
I_1585923	I	1585923	0.529918	PC1	4.05719	0	NA	NA	NA	NA	NA	NA	NA	NA	NA
I_1587734	I	1587734	0.481599	PC1	4.05719	0	NA	NA	NA	NA	NA	NA	NA	NA	NA
I_1588602	I	1588602	0.43629	PC1	4.05719	0	NA	NA	NA	NA	NA	NA	NA	NA	NA
I_1588855	I	1588855	0.239188	PC1	4.05719	0	NA	NA	NA	NA	NA	NA	NA	NA	NA
I_1588915	I	1588915	0.635225	PC1	4.05719	0	NA	NA	NA	NA	NA	NA	NA	NA	NA
I_1592181	I	1592181	0.262691	PC1	4.05719	0	NA	NA	NA	NA	NA	NA	NA	NA	NA
I_1592712	I	1592712	0.295708	PC1	4.05719	0	NA	NA	NA	NA	NA	NA	NA	NA	NA
I_1597159	I	1597159	0.0362081	PC1	4.05719	0	NA	NA	NA	NA	NA	NA	NA	NA	NA
I_1597935	I	1597935	0.0187423	PC1	4.05719	0	NA	NA	NA	NA	NA	NA	NA	NA	NA
I_1599601	I	1599601	0.406344	PC1	4.05719	0	NA	NA	NA	NA	NA	NA	NA	NA	NA
I_1600073	I	1600073	0.0885829	PC1	4.05719	0	NA	NA	NA	NA	NA	NA	NA	NA	NA
I_1600076	I	1600076	1.09916	PC1	4.05719	0	NA	NA	NA	NA	NA	NA	NA	NA	NA
I_1601130	I	1601130	0.310276	PC1	4.05719	0	NA	NA	NA	NA	NA	NA	NA	NA	NA
I_1601293	I	1601293	0.746227	PC1	4.05719	0	NA	NA	NA	NA	NA	NA	NA	NA	NA
I_1604842	I	1604842	0.373079	PC1	4.05719	0	NA	NA	NA	NA	NA	NA	NA	NA	NA
I_1606465	I	1606465	0.491472	PC1	4.05719	0	NA	NA	NA	NA	NA	NA	NA	NA	NA
I_1610703	I	1610703	0.0873767	PC1	4.05719	0	NA	NA	NA	NA	NA	NA	NA	NA	NA
I_1622939	I	1622939	0.990652	PC1	4.05719	0	NA	NA	NA	NA	NA	NA	NA	NA	NA
I_1623613	I	1623613	0.604803	PC1	4.05719	0	NA	NA	NA	NA	NA	NA	NA	NA	NA
I_1625311	I	1625311	0.0731291	PC1	4.05719	0	NA	NA	NA	NA	NA	NA	NA	NA	NA
I_1626141	I	1626141	0.172579	PC1	4.05719	0	NA	NA	NA	NA	NA	NA	NA	NA	NA
I_1627088	I	1627088	0.117268	PC1	4.05719	0	NA	NA	NA	NA	NA	NA	NA	NA	NA
I_1634040	I	1634040	0.74933	PC1	4.05719	0	NA	NA	NA	NA	NA	NA	NA	NA	NA
I_1635052	I	1635052	0.0739926	PC1	4.05719	0	NA	NA	NA	NA	NA	NA	NA	NA	NA
I_1635216	I	1635216	0.0916244	PC1	4.05719	0	NA	NA	NA	NA	NA	NA	NA	NA	NA
I_1636305	I	1636305	0.200068	PC1	4.05719	0	NA	NA	NA	NA	NA	NA	NA	NA	NA
I_1636553	I	1636553	0.0501929	PC1	4.05719	0	NA	NA	NA	NA	NA	NA	NA	NA	NA
I_1638119	I	1638119	0.404351	PC1	4.05719	0	NA	NA	NA	NA	NA	NA	NA	NA	NA
I_1638691	I	1638691	0.112876	PC1	4.05719	0	NA	NA	NA	NA	NA	NA	NA	NA	NA
I_1642990	I	1642990	0.0446942	PC1	4.05719	0	NA	NA	NA	NA	NA	NA	NA	NA	NA
I_1644194	I	1644194	0.0597165	PC1	4.05719	0	NA	NA	NA	NA	NA	NA	NA	NA	NA
I_1645630	I	1645630	1.00336	PC1	4.05719	0	NA	NA	NA	NA	NA	NA	NA	NA	NA
I_1649125	I	1649125	0.0710325	PC1	4.05719	0	NA	NA	NA	NA	NA	NA	NA	NA	NA
I_1649783	I	1649783	0.0829421	PC1	4.05719	0	NA	NA	NA	NA	NA	NA	NA	NA	NA
I_1649959	I	1649959	0.39107	PC1	4.05719	0	NA	NA	NA	NA	NA	NA	NA	NA	NA
I_1650169	I	1650169	0.0414057	PC1	4.05719	0	NA	NA	NA	NA	NA	NA	NA	NA	NA
I_1651826	I	1651826	0.763454	PC1	4.05719	0	NA	NA	NA	NA	NA	NA	NA	NA	NA
I_1653135	I	1653135	0.727633	PC1	4.05719	0	NA	NA	NA	NA	NA	NA	NA	NA	NA
I_1654023	I	1654023	0.64462	PC1	4.05719	0	NA	NA	NA	NA	NA	NA	NA	NA	NA
I_1654361	I	1654361	0.854916	PC1	4.05719	0	NA	NA	NA	NA	NA	NA	NA	NA	NA
I_1655408	I	1655408	0.270017	PC1	4.05719	0	NA	NA	NA	NA	NA	NA	NA	NA	NA
I_1656763	I	1656763	0.212038	PC1	4.05719	0	NA	NA	NA	NA	NA	NA	NA	NA	NA
I_1657047	I	1657047	0.404351	PC1	4.05719	0	NA	NA	NA	NA	NA	NA	NA	NA	NA
I_1657899	I	1657899	0.222239	PC1	4.05719	0	NA	NA	NA	NA	NA	NA	NA	NA	NA
I_1657940	I	1657940	0.330501	PC1	4.05719	0	NA	NA	NA	NA	NA	NA	NA	NA	NA
I_1664276	I	1664276	1.00336	PC1	4.05719	0	NA	NA	NA	NA	NA	NA	NA	NA	NA
I_1664327	I	1664327	0.150281	PC1	4.05719	0	NA	NA	NA	NA	NA	NA	NA	NA	NA
I_1664344	I	1664344	0.329681	PC1	4.05719	0	NA	NA	NA	NA	NA	NA	NA	NA	NA
I_1666416	I	1666416	0.746492	PC1	4.05719	0	NA	NA	NA	NA	NA	NA	NA	NA	NA
I_1667280	I	1667280	0.00360672	PC1	4.05719	0	NA	NA	NA	NA	NA	NA	NA	NA	NA
I_1667421	I	1667421	0.269327	PC1	4.05719	0	NA	NA	NA	NA	NA	NA	NA	NA	NA
I_1667992	I	1667992	0.472054	PC1	4.05719	0	NA	NA	NA	NA	NA	NA	NA	NA	NA
I_1668607	I	1668607	1.2613	PC1	4.05719	0	NA	NA	NA	NA	NA	NA	NA	NA	NA
I_1670909	I	1670909	0.778348	PC1	4.05719	0	NA	NA	NA	NA	NA	NA	NA	NA	NA
I_1672676	I	1672676	0.107288	PC1	4.05719	0	NA	NA	NA	NA	NA	NA	NA	NA	NA
I_1673141	I	1673141	0.100269	PC1	4.05719	0	NA	NA	NA	NA	NA	NA	NA	NA	NA
I_1673170	I	1673170	0.0251069	PC1	4.05719	0	NA	NA	NA	NA	NA	NA	NA	NA	NA
I_1673864	I	1673864	0.87069	PC1	4.05719	0	NA	NA	NA	NA	NA	NA	NA	NA	NA
I_1675492	I	1675492	0.0361346	PC1	4.05719	0	NA	NA	NA	NA	NA	NA	NA	NA	NA
I_1676688	I	1676688	0.57669	PC1	4.05719	0	NA	NA	NA	NA	NA	NA	NA	NA	NA
I_1677002	I	1677002	0.0285934	PC1	4.05719	0	NA	NA	NA	NA	NA	NA	NA	NA	NA
I_1677771	I	1677771	0.6627	PC1	4.05719	0	NA	NA	NA	NA	NA	NA	NA	NA	NA
I_1677845	I	1677845	1.58226	PC1	4.05719	0	NA	NA	NA	NA	NA	NA	NA	NA	NA
I_1679070	I	1679070	0.929533	PC1	4.05719	0	NA	NA	NA	NA	NA	NA	NA	NA	NA
I_1679350	I	1679350	0.918926	PC1	4.05719	0	NA	NA	NA	NA	NA	NA	NA	NA	NA
I_1681731	I	1681731	0.187711	PC1	4.05719	0	NA	NA	NA	NA	NA	NA	NA	NA	NA
I_1682992	I	1682992	0.217641	PC1	4.05719	0	NA	NA	NA	NA	NA	NA	NA	NA	NA
I_1683529	I	1683529	0.0179155	PC1	4.05719	0	NA	NA	NA	NA	NA	NA	NA	NA	NA
I_1686891	I	1686891	0.203006	PC1	4.05719	0	NA	NA	NA	NA	NA	NA	NA	NA	NA
I_1687738	I	1687738	0.746492	PC1	4.05719	0	NA	NA	NA	NA	NA	NA	NA	NA	NA
I_1688960	I	1688960	0.249981	PC1	4.05719	0	NA	NA	NA	NA	NA	NA	NA	NA	NA
I_1689321	I	1689321	0.258383	PC1	4.05719	0	NA	NA	NA	NA	NA	NA	NA	NA	NA
I_1691867	I	1691867	0.00184615	PC1	4.05719	0	NA	NA	NA	NA	NA	NA	NA	NA	NA
I_1691884	I	1691884	0.0504997	PC1	4.05719	0	NA	NA	NA	NA	NA	NA	NA	NA	NA
I_1692857	I	1692857	0.0539973	PC1	4.05719	0	NA	NA	NA	NA	NA	NA	NA	NA	NA
I_1693624	I	1693624	0.175151	PC1	4.05719	0	NA	NA	NA	NA	NA	NA	NA	NA	NA
I_1693647	I	1693647	0.614545	PC1	4.05719	0	NA	NA	NA	NA	NA	NA	NA	NA	NA
I_1695463	I	1695463	0.528007	PC1	4.05719	0	NA	NA	NA	NA	NA	NA	NA	NA	NA
I_1697628	I	1697628	0.00887104	PC1	4.05719	0	NA	NA	NA	NA	NA	NA	NA	NA	NA
I_1697969	I	1697969	0.679849	PC1	4.05719	0	NA	NA	NA	NA	NA	NA	NA	NA	NA
I_1698671	I	1698671	0.538066	PC1	4.05719	0	NA	NA	NA	NA	NA	NA	NA	NA	NA
I_1700479	I	1700479	0.196981	PC1	4.05719	0	NA	NA	NA	NA	NA	NA	NA	NA	NA
I_1701178	I	1701178	0.311045	PC1	4.05719	0	NA	NA	NA	NA	NA	NA	NA	NA	NA
I_1702711	I	1702711	1.06309	PC1	4.05719	0	NA	NA	NA	NA	NA	NA	NA	NA	NA
I_1703084	I	1703084	1.17538	PC1	4.05719	0	NA	NA	NA	NA	NA	NA	NA	NA	NA
I_1704244	I	1704244	0.249592	PC1	4.05719	0	NA	NA	NA	NA	NA	NA	NA	NA	NA
I_1704374	I	1704374	0.582538	PC1	4.05719	0	NA	NA	NA	NA	NA	NA	NA	NA	NA
I_1711285	I	1711285	0.70462	PC1	4.05719	0	NA	NA	NA	NA	NA	NA	NA	NA	NA
I_1715240	I	1715240	0.436428	PC1	4.05719	0	NA	NA	NA	NA	NA	NA	NA	NA	NA
I_1715441	I	1715441	0.792113	PC1	4.05719	0	NA	NA	NA	NA	NA	NA	NA	NA	NA
I_1717232	I	1717232	0.262821	PC1	4.05719	0	NA	NA	NA	NA	NA	NA	NA	NA	NA
I_1717957	I	1717957	0.836552	PC1	4.05719	0	NA	NA	NA	NA	NA	NA	NA	NA	NA
I_1718442	I	1718442	0.460588	PC1	4.05719	0	NA	NA	NA	NA	NA	NA	NA	NA	NA
I_1718986	I	1718986	0.0333522	PC1	4.05719	0	NA	NA	NA	NA	NA	NA	NA	NA	NA
I_1718987	I	1718987	0.00434462	PC1	4.05719	0	NA	NA	NA	NA	NA	NA	NA	NA	NA
I_1719434	I	1719434	0.0155644	PC1	4.05719	0	NA	NA	NA	NA	NA	NA	NA	NA	NA
I_1721466	I	1721466	0.833955	PC1	4.05719	0	NA	NA	NA	NA	NA	NA	NA	NA	NA
I_1721502	I	1721502	0.57801	PC1	4.05719	0	NA	NA	NA	NA	NA	NA	NA	NA	NA
I_1722651	I	1722651	0.122967	PC1	4.05719	0	NA	NA	NA	NA	NA	NA	NA	NA	NA
I_1725858	I	1725858	0.249491	PC1	4.05719	0	NA	NA	NA	NA	NA	NA	NA	NA	NA
I_1726395	I	1726395	0.26316	PC1	4.05719	0	NA	NA	NA	NA	NA	NA	NA	NA	NA
I_1726396	I	1726396	0.0776422	PC1	4.05719	0	NA	NA	NA	NA	NA	NA	NA	NA	NA
I_1727192	I	1727192	0.558141	PC1	4.05719	0	NA	NA	NA	NA	NA	NA	NA	NA	NA
I_1727308	I	1727308	0.0114684	PC1	4.05719	0	NA	NA	NA	NA	NA	NA	NA	NA	NA
I_1727426	I	1727426	0.165756	PC1	4.05719	0	NA	NA	NA	NA	NA	NA	NA	NA	NA
I_1729328	I	1729328	0.780059	PC1	4.05719	0	NA	NA	NA	NA	NA	NA	NA	NA	NA
I_1729512	I	1729512	0.198267	PC1	4.05719	0	NA	NA	NA	NA	NA	NA	NA	NA	NA
I_1730710	I	1730710	0.277167	PC1	4.05719	0	NA	NA	NA	NA	NA	NA	NA	NA	NA
I_1731687	I	1731687	0.0541323	PC1	4.05719	0	NA	NA	NA	NA	NA	NA	NA	NA	NA
I_1732348	I	1732348	0.493298	PC1	4.05719	0	NA	NA	NA	NA	NA	NA	NA	NA	NA
I_1733114	I	1733114	1.71322	PC1	4.05719	0	NA	NA	NA	NA	NA	NA	NA	NA	NA
I_1734383	I	1734383	0.237798	PC1	4.05719	0	NA	NA	NA	NA	NA	NA	NA	NA	NA
I_1734927	I	1734927	0.0825891	PC1	4.05719	0	NA	NA	NA	NA	NA	NA	NA	NA	NA
I_1736527	I	1736527	0.460588	PC1	4.05719	0	NA	NA	NA	NA	NA	NA	NA	NA	NA
I_1738955	I	1738955	0.181214	PC1	4.05719	0	NA	NA	NA	NA	NA	NA	NA	NA	NA
I_1739195	I	1739195	0.833955	PC1	4.05719	0	NA	NA	NA	NA	NA	NA	NA	NA	NA
I_1739301	I	1739301	0.0878204	PC1	4.05719	0	NA	NA	NA	NA	NA	NA	NA	NA	NA
I_1740998	I	1740998	0.0749145	PC1	4.05719	0	NA	NA	NA	NA	NA	NA	NA	NA	NA
I_1748330	I	1748330	0.0391483	PC1	4.05719	0	NA	NA	NA	NA	NA	NA	NA	NA	NA
I_1750813	I	1750813	0.0146876	PC1	4.05719	0	NA	NA	NA	NA	NA	NA	NA	NA	NA
I_1751480	I	1751480	0.165756	PC1	4.05719	0	NA	NA	NA	NA	NA	NA	NA	NA	NA
I_1758985	I	1758985	0.856101	PC1	4.05719	0	NA	NA	NA	NA	NA	NA	NA	NA	NA
I_1760785	I	1760785	0.271013	PC1	4.05719	0	NA	NA	NA	NA	NA	NA	NA	NA	NA
I_1762305	I	1762305	0.28397	PC1	4.05719	0	NA	NA	NA	NA	NA	NA	NA	NA	NA
I_1763622	I	1763622	0.401482	PC1	4.05719	0	NA	NA	NA	NA	NA	NA	NA	NA	NA
I_1763719	I	1763719	0.175486	PC1	4.05719	0	NA	NA	NA	NA	NA	NA	NA	NA	NA
I_1763837	I	1763837	0.474726	PC1	4.05719	0	NA	NA	NA	NA	NA	NA	NA	NA	NA
I_1768295	I	1768295	0.299804	PC1	4.05719	0	NA	NA	NA	NA	NA	NA	NA	NA	NA
I_1768469	I	1768469	0.564114	PC1	4.05719	0	NA	NA	NA	NA	NA	NA	NA	NA	NA
I_1775399	I	1775399	0.171946	PC1	4.05719	0	NA	NA	NA	NA	NA	NA	NA	NA	NA
I_1777085	I	1777085	0.18369	PC1	4.05719	0	NA	NA	NA	NA	NA	NA	NA	NA	NA
I_1777098	I	1777098	0.366227	PC1	4.05719	0	NA	NA	NA	NA	NA	NA	NA	NA	NA
I_1777178	I	1777178	0.181595	PC1	4.05719	0	NA	NA	NA	NA	NA	NA	NA	NA	NA
I_1778576	I	1778576	0.602348	PC1	4.05719	0	NA	NA	NA	NA	NA	NA	NA	NA	NA
I_1778736	I	1778736	0.466767	PC1	4.05719	0	NA	NA	NA	NA	NA	NA	NA	NA	NA
I_1780496	I	1780496	0.12422	PC1	4.05719	0	NA	NA	NA	NA	NA	NA	NA	NA	NA
I_1780524	I	1780524	0.151699	PC1	4.05719	0	NA	NA	NA	NA	NA	NA	NA	NA	NA
I_1781567	I	1781567	0.325076	PC1	4.05719	0	NA	NA	NA	NA	NA	NA	NA	NA	NA
I_1790278	I	1790278	0.568605	PC1	4.05719	0	NA	NA	NA	NA	NA	NA	NA	NA	NA
I_1790492	I	1790492	0.0199935	PC1	4.05719	0	NA	NA	NA	NA	NA	NA	NA	NA	NA
I_1791364	I	1791364	0.573454	PC1	4.05719	0	NA	NA	NA	NA	NA	NA	NA	NA	NA
I_1792401	I	1792401	0.0559819	PC1	4.05719	0	NA	NA	NA	NA	NA	NA	NA	NA	NA
I_1793122	I	1793122	0.115239	PC1	4.05719	0	NA	NA	NA	NA	NA	NA	NA	NA	NA
I_1794822	I	1794822	0.0258075	PC1	4.05719	0	NA	NA	NA	NA	NA	NA	NA	NA	NA
I_1795670	I	1795670	0.145299	PC1	4.05719	0	NA	NA	NA	NA	NA	NA	NA	NA	NA
I_1797155	I	1797155	0.856101	PC1	4.05719	0	NA	NA	NA	NA	NA	NA	NA	NA	NA
I_1800327	I	1800327	0.0679515	PC1	4.05719	0	NA	NA	NA	NA	NA	NA	NA	NA	NA
I_1802220	I	1802220	0.0382848	PC1	4.05719	0	NA	NA	NA	NA	NA	NA	NA	NA	NA
I_1803069	I	1803069	0.305666	PC1	4.05719	0	NA	NA	NA	NA	NA	NA	NA	NA	NA
I_1804162	I	1804162	0.229506	PC1	4.05719	0	NA	NA	NA	NA	NA	NA	NA	NA	NA
I_1805576	I	1805576	0.419636	PC1	4.05719	0	NA	NA	NA	NA	NA	NA	NA	NA	NA
I_1805726	I	1805726	0.613731	PC1	4.05719	0	NA	NA	NA	NA	NA	NA	NA	NA	NA
I_1806047	I	1806047	0.542449	PC1	4.05719	0	NA	NA	NA	NA	NA	NA	NA	NA	NA
I_1806250	I	1806250	0.463481	PC1	4.05719	0	NA	NA	NA	NA	NA	NA	NA	NA	NA
I_1806906	I	1806906	0.0908089	PC1	4.05719	0	NA	NA	NA	NA	NA	NA	NA	NA	NA
I_1808883	I	1808883	0.483874	PC1	4.05719	0	NA	NA	NA	NA	NA	NA	NA	NA	NA
I_1810459	I	1810459	0.181595	PC1	4.05719	0	NA	NA	NA	NA	NA	NA	NA	NA	NA
I_1812887	I	1812887	0.740858	PC1	4.05719	0	NA	NA	NA	NA	NA	NA	NA	NA	NA
I_1814387	I	1814387	0.196212	PC1	4.05719	0	NA	NA	NA	NA	NA	NA	NA	NA	NA
I_1817047	I	1817047	0.145299	PC1	4.05719	0	NA	NA	NA	NA	NA	NA	NA	NA	NA
I_1817071	I	1817071	0.336375	PC1	4.05719	0	NA	NA	NA	NA	NA	NA	NA	NA	NA
I_1817078	I	1817078	0.107288	PC1	4.05719	0	NA	NA	NA	NA	NA	NA	NA	NA	NA
I_1817141	I	1817141	0.135127	PC1	4.05719	0	NA	NA	NA	NA	NA	NA	NA	NA	NA
I_1817983	I	1817983	0.288352	PC1	4.05719	0	NA	NA	NA	NA	NA	NA	NA	NA	NA
I_1819339	I	1819339	0.0269454	PC1	4.05719	0	NA	NA	NA	NA	NA	NA	NA	NA	NA
I_1819404	I	1819404	0.721716	PC1	4.05719	0	NA	NA	NA	NA	NA	NA	NA	NA	NA
I_1820122	I	1820122	0.599572	PC1	4.05719	0	NA	NA	NA	NA	NA	NA	NA	NA	NA
I_1820185	I	1820185	0.335872	PC1	4.05719	0	NA	NA	NA	NA	NA	NA	NA	NA	NA
I_1822641	I	1822641	0.838083	PC1	4.05719	0	NA	NA	NA	NA	NA	NA	NA	NA	NA
I_1823335	I	1823335	0.19592	PC1	4.05719	0	NA	NA	NA	NA	NA	NA	NA	NA	NA
I_1825779	I	1825779	0.479705	PC1	4.05719	0	NA	NA	NA	NA	NA	NA	NA	NA	NA
I_1826318	I	1826318	0.652709	PC1	4.05719	0	NA	NA	NA	NA	NA	NA	NA	NA	NA
I_1826429	I	1826429	0.18588	PC1	4.05719	0	NA	NA	NA	NA	NA	NA	NA	NA	NA
I_1827274	I	1827274	1.20966	PC1	4.05719	0	NA	NA	NA	NA	NA	NA	NA	NA	NA
I_1827954	I	1827954	0.740858	PC1	4.05719	0	NA	NA	NA	NA	NA	NA	NA	NA	NA
I_1829726	I	1829726	0.145735	PC1	4.05719	0	NA	NA	NA	NA	NA	NA	NA	NA	NA
I_1829903	I	1829903	1.37148	PC1	4.05719	0	NA	NA	NA	NA	NA	NA	NA	NA	NA
I_1830282	I	1830282	0.539831	PC1	4.05719	0	NA	NA	NA	NA	NA	NA	NA	NA	NA
I_1830678	I	1830678	0.344754	PC1	4.05719	0	NA	NA	NA	NA	NA	NA	NA	NA	NA
I_1831741	I	1831741	0.106169	PC1	4.05719	0	NA	NA	NA	NA	NA	NA	NA	NA	NA
I_1831796	I	1831796	0.403965	PC1	4.05719	0	NA	NA	NA	NA	NA	NA	NA	NA	NA
I_1832760	I	1832760	0.285306	PC1	4.05719	0	NA	NA	NA	NA	NA	NA	NA	NA	NA
I_1836625	I	1836625	0.357604	PC1	4.05719	0	NA	NA	NA	NA	NA	NA	NA	NA	NA
I_1836887	I	1836887	0.251623	PC1	4.05719	0	NA	NA	NA	NA	NA	NA	NA	NA	NA
I_1838364	I	1838364	0.175117	PC1	4.05719	0	NA	NA	NA	NA	NA	NA	NA	NA	NA
I_1838366	I	1838366	0.18588	PC1	4.05719	0	NA	NA	NA	NA	NA	NA	NA	NA	NA
I_1840495	I	1840495	0.553409	PC1	4.05719	0	NA	NA	NA	NA	NA	NA	NA	NA	NA
I_1841116	I	1841116	0.460248	PC1	4.05719	0	NA	NA	NA	NA	NA	NA	NA	NA	NA
I_1843849	I	1843849	1.01372	PC1	4.05719	0	NA	NA	NA	NA	NA	NA	NA	NA	NA
I_1845052	I	1845052	0.277498	PC1	4.05719	0	NA	NA	NA	NA	NA	NA	NA	NA	NA
I_1845121	I	1845121	0.278226	PC1	4.05719	0	NA	NA	NA	NA	NA	NA	NA	NA	NA
I_1845215	I	1845215	0.0207407	PC1	4.05719	0	NA	NA	NA	NA	NA	NA	NA	NA	NA
I_1845495	I	1845495	0.119137	PC1	4.05719	0	NA	NA	NA	NA	NA	NA	NA	NA	NA
I_1846045	I	1846045	0.338383	PC1	4.05719	0	NA	NA	NA	NA	NA	NA	NA	NA	NA
I_1847022	I	1847022	0.539831	PC1	4.05719	0	NA	NA	NA	NA	NA	NA	NA	NA	NA
I_1848097	I	1848097	1.37148	PC1	4.05719	0	NA	NA	NA	NA	NA	NA	NA	NA	NA
I_1857126	I	1857126	0.546263	PC1	4.05719	0	NA	NA	NA	NA	NA	NA	NA	NA	NA
I_1857751	I	1857751	0.838083	PC1	4.05719	0	NA	NA	NA	NA	NA	NA	NA	NA	NA
I_1858273	I	1858273	0.252458	PC1	4.05719	0	NA	NA	NA	NA	NA	NA	NA	NA	NA
I_1858436	I	1858436	0.498478	PC1	4.05719	0	NA	NA	NA	NA	NA	NA	NA	NA	NA
I_1859641	I	1859641	0.0178952	PC1	4.05719	0	NA	NA	NA	NA	NA	NA	NA	NA	NA
I_1859713	I	1859713	0.740858	PC1	4.05719	0	NA	NA	NA	NA	NA	NA	NA	NA	NA
I_1859820	I	1859820	0.451691	PC1	4.05719	0	NA	NA	NA	NA	NA	NA	NA	NA	NA
I_1860922	I	1860922	0.238166	PC1	4.05719	0	NA	NA	NA	NA	NA	NA	NA	NA	NA
I_1861201	I	1861201	0.707956	PC1	4.05719	0	NA	NA	NA	NA	NA	NA	NA	NA	NA
I_1865859	I	1865859	0.0158875	PC1	4.05719	0	NA	NA	NA	NA	NA	NA	NA	NA	NA
I_1873767	I	1873767	0.474726	PC1	4.05719	0	NA	NA	NA	NA	NA	NA	NA	NA	NA
I_1874805	I	1874805	0.555303	PC1	4.05719	0	NA	NA	NA	NA	NA	NA	NA	NA	NA
I_1874811	I	1874811	0.142747	PC1	4.05719	0	NA	NA	NA	NA	NA	NA	NA	NA	NA
I_1875169	I	1875169	0.379032	PC1	4.05719	0	NA	NA	NA	NA	NA	NA	NA	NA	NA
I_1876352	I	1876352	0.18588	PC1	4.05719	0	NA	NA	NA	NA	NA	NA	NA	NA	NA
I_1876381	I	1876381	0.253589	PC1	4.05719	0	NA	NA	NA	NA	NA	NA	NA	NA	NA
I_1876424	I	1876424	0.173436	PC1	4.05719	0	NA	NA	NA	NA	NA	NA	NA	NA	NA
I_1876789	I	1876789	0.284832	PC1	4.05719	0	NA	NA	NA	NA	NA	NA	NA	NA	NA
I_1876790	I	1876790	0.039979	PC1	4.05719	0	NA	NA	NA	NA	NA	NA	NA	NA	NA
I_1878171	I	1878171	0.144928	PC1	4.05719	0	NA	NA	NA	NA	NA	NA	NA	NA	NA
I_1878234	I	1878234	0.203171	PC1	4.05719	0	NA	NA	NA	NA	NA	NA	NA	NA	NA
I_1879681	I	1879681	0.0587845	PC1	4.05719	0	NA	NA	NA	NA	NA	NA	NA	NA	NA
I_1880625	I	1880625	0.0732212	PC1	4.05719	0	NA	NA	NA	NA	NA	NA	NA	NA	NA
I_1881811	I	1881811	0.899842	PC1	4.05719	0	NA	NA	NA	NA	NA	NA	NA	NA	NA
I_1882333	I	1882333	0.784218	PC1	4.05719	0	NA	NA	NA	NA	NA	NA	NA	NA	NA
I_1883323	I	1883323	0.730451	PC1	4.05719	0	NA	NA	NA	NA	NA	NA	NA	NA	NA
I_1883531	I	1883531	0.981498	PC1	4.05719	0	NA	NA	NA	NA	NA	NA	NA	NA	NA
I_1884419	I	1884419	1.93443	PC1	4.05719	0	NA	NA	NA	NA	NA	NA	NA	NA	NA
I_1884433	I	1884433	1.91844	PC1	4.05719	0	NA	NA	NA	NA	NA	NA	NA	NA	NA
I_1886503	I	1886503	0.448905	PC1	4.05719	0	NA	NA	NA	NA	NA	NA	NA	NA	NA
I_1886781	I	1886781	1.20605	PC1	4.05719	0	NA	NA	NA	NA	NA	NA	NA	NA	NA
I_1892769	I	1892769	0.474726	PC1	4.05719	0	NA	NA	NA	NA	NA	NA	NA	NA	NA
I_1892869	I	1892869	0.72254	PC1	4.05719	0	NA	NA	NA	NA	NA	NA	NA	NA	NA
I_1894235	I	1894235	0.740858	PC1	4.05719	0	NA	NA	NA	NA	NA	NA	NA	NA	NA
I_1902516	I	1902516	0.146793	PC1	4.05719	0	NA	NA	NA	NA	NA	NA	NA	NA	NA
I_1902811	I	1902811	0.203006	PC1	4.05719	0	NA	NA	NA	NA	NA	NA	NA	NA	NA
I_1907215	I	1907215	0.113537	PC1	4.05719	0	NA	NA	NA	NA	NA	NA	NA	NA	NA
I_1908402	I	1908402	0.457902	PC1	4.05719	0	NA	NA	NA	NA	NA	NA	NA	NA	NA
I_1911965	I	1911965	0.805333	PC1	4.05719	0	NA	NA	NA	NA	NA	NA	NA	NA	NA
I_1915076	I	1915076	0.0805755	PC1	4.05719	0	NA	NA	NA	NA	NA	NA	NA	NA	NA
I_1915235	I	1915235	0.050297	PC1	4.05719	0	NA	NA	NA	NA	NA	NA	NA	NA	NA
I_1916382	I	1916382	0.00893761	PC1	4.05719	0	NA	NA	NA	NA	NA	NA	NA	NA	NA
I_1916420	I	1916420	0.241257	PC1	4.05719	0	NA	NA	NA	NA	NA	NA	NA	NA	NA
I_1916797	I	1916797	0.495405	PC1	4.05719	0	NA	NA	NA	NA	NA	NA	NA	NA	NA
I_1917065	I	1917065	0.170559	PC1	4.05719	0	NA	NA	NA	NA	NA	NA	NA	NA	NA
I_1917925	I	1917925	0.623569	PC1	4.05719	0	NA	NA	NA	NA	NA	NA	NA	NA	NA
I_1917960	I	1917960	0.639443	PC1	4.05719	0	NA	NA	NA	NA	NA	NA	NA	NA	NA
I_1918566	I	1918566	0.468609	PC1	4.05719	0	NA	NA	NA	NA	NA	NA	NA	NA	NA
I_1919458	I	1919458	0.0526875	PC1	4.05719	0	NA	NA	NA	NA	NA	NA	NA	NA	NA
I_1929645	I	1929645	0.0140118	PC1	4.05719	0	NA	NA	NA	NA	NA	NA	NA	NA	NA
I_1932975	I	1932975	0.153535	PC1	4.05719	0	NA	NA	NA	NA	NA	NA	NA	NA	NA
I_1933111	I	1933111	0.110769	PC1	4.05719	0	NA	NA	NA	NA	NA	NA	NA	NA	NA
I_1934528	I	1934528	0.447084	PC1	4.05719	0	NA	NA	NA	NA	NA	NA	NA	NA	NA
I_1938599	I	1938599	0.0248984	PC1	4.05719	0	NA	NA	NA	NA	NA	NA	NA	NA	NA
I_1941143	I	1941143	0.267245	PC1	4.05719	0	NA	NA	NA	NA	NA	NA	NA	NA	NA
I_1941366	I	1941366	0.521405	PC1	4.05719	0	NA	NA	NA	NA	NA	NA	NA	NA	NA
I_1942588	I	1942588	0.959742	PC1	4.05719	0	NA	NA	NA	NA	NA	NA	NA	NA	NA
I_1945616	I	1945616	0.32313	PC1	4.05719	0	NA	NA	NA	NA	NA	NA	NA	NA	NA
I_1945928	I	1945928	0.352896	PC1	4.05719	0	NA	NA	NA	NA	NA	NA	NA	NA	NA
I_1947747	I	1947747	0.771767	PC1	4.05719	0	NA	NA	NA	NA	NA	NA	NA	NA	NA
I_1960501	I	1960501	0.588657	PC1	4.05719	0	NA	NA	NA	NA	NA	NA	NA	NA	NA
I_1964735	I	1964735	0.0492571	PC1	4.05719	0	NA	NA	NA	NA	NA	NA	NA	NA	NA
I_1968282	I	1968282	1.01309	PC1	4.05719	0	NA	NA	NA	NA	NA	NA	NA	NA	NA
I_1968774	I	1968774	0.0539998	PC1	4.05719	0	NA	NA	NA	NA	NA	NA	NA	NA	NA
I_1972580	I	1972580	0.206103	PC1	4.05719	0	NA	NA	NA	NA	NA	NA	NA	NA	NA
I_1972719	I	1972719	0.0171442	PC1	4.05719	0	NA	NA	NA	NA	NA	NA	NA	NA	NA
I_1973720	I	1973720	0.45972	PC1	4.05719	0	NA	NA	NA	NA	NA	NA	NA	NA	NA
I_1973889	I	1973889	0.184451	PC1	4.05719	0	NA	NA	NA	NA	NA	NA	NA	NA	NA
I_1977851	I	1977851	0.152746	PC1	4.05719	0	NA	NA	NA	NA	NA	NA	NA	NA	NA
I_1978169	I	1978169	0.334135	PC1	4.05719	0	NA	NA	NA	NA	NA	NA	NA	NA	NA
I_1981352	I	1981352	0.710431	PC1	4.05719	0	NA	NA	NA	NA	NA	NA	NA	NA	NA
I_1983282	I	1983282	0.773069	PC1	4.05719	0	NA	NA	NA	NA	NA	NA	NA	NA	NA
I_1983844	I	1983844	0.107288	PC1	4.05719	0	NA	NA	NA	NA	NA	NA	NA	NA	NA
I_1983867	I	1983867	0.263601	PC1	4.05719	0	NA	NA	NA	NA	NA	NA	NA	NA	NA
I_1984126	I	1984126	0.481119	PC1	4.05719	0	NA	NA	NA	NA	NA	NA	NA	NA	NA
I_1984230	I	1984230	0.373342	PC1	4.05719	0	NA	NA	NA	NA	NA	NA	NA	NA	NA
I_1984419	I	1984419	0.0256804	PC1	4.05719	0	NA	NA	NA	NA	NA	NA	NA	NA	NA
I_1985978	I	1985978	0.929765	PC1	4.05719	0	NA	NA	NA	NA	NA	NA	NA	NA	NA
I_1986154	I	1986154	0.199823	PC1	4.05719	0	NA	NA	NA	NA	NA	NA	NA	NA	NA
I_1988317	I	1988317	1.09634	PC1	4.05719	0	NA	NA	NA	NA	NA	NA	NA	NA	NA
I_1988632	I	1988632	0.210107	PC1	4.05719	0	NA	NA	NA	NA	NA	NA	NA	NA	NA
I_1989103	I	1989103	0.4895	PC1	4.05719	0	NA	NA	NA	NA	NA	NA	NA	NA	NA
I_1989106	I	1989106	0.628883	PC1	4.05719	0	NA	NA	NA	NA	NA	NA	NA	NA	NA
I_1991708	I	1991708	1.12377	PC1	4.05719	0	NA	NA	NA	NA	NA	NA	NA	NA	NA
I_1994395	I	1994395	0.010588	PC1	4.05719	0	NA	NA	NA	NA	NA	NA	NA	NA	NA
I_1996799	I	1996799	0.613075	PC1	4.05719	0	NA	NA	NA	NA	NA	NA	NA	NA	NA
I_1996959	I	1996959	0.900056	PC1	4.05719	0	NA	NA	NA	NA	NA	NA	NA	NA	NA
I_1997391	I	1997391	0.474726	PC1	4.05719	0	NA	NA	NA	NA	NA	NA	NA	NA	NA
I_2004909	I	2004909	0.122066	PC1	4.05719	0	NA	NA	NA	NA	NA	NA	NA	NA	NA
I_2005292	I	2005292	1.49882	PC1	4.05719	0	NA	NA	NA	NA	NA	NA	NA	NA	NA
I_2007289	I	2007289	0.772415	PC1	4.05719	0	NA	NA	NA	NA	NA	NA	NA	NA	NA
I_2009186	I	2009186	0.537441	PC1	4.05719	0	NA	NA	NA	NA	NA	NA	NA	NA	NA
I_2009926	I	2009926	0.650838	PC1	4.05719	0	NA	NA	NA	NA	NA	NA	NA	NA	NA
I_2011482	I	2011482	0.0426803	PC1	4.05719	0	NA	NA	NA	NA	NA	NA	NA	NA	NA
I_2012869	I	2012869	0.458143	PC1	4.05719	0	NA	NA	NA	NA	NA	NA	NA	NA	NA
I_2013029	I	2013029	1.07127	PC1	4.05719	0	NA	NA	NA	NA	NA	NA	NA	NA	NA
I_2015535	I	2015535	0.306399	PC1	4.05719	0	NA	NA	NA	NA	NA	NA	NA	NA	NA
I_2016939	I	2016939	0.225791	PC1	4.05719	0	NA	NA	NA	NA	NA	NA	NA	NA	NA
I_2018575	I	2018575	0.550794	PC1	4.05719	0	NA	NA	NA	NA	NA	NA	NA	NA	NA
I_2018645	I	2018645	1.04912	PC1	4.05719	0	NA	NA	NA	NA	NA	NA	NA	NA	NA
I_2019427	I	2019427	0.474726	PC1	4.05719	0	NA	NA	NA	NA	NA	NA	NA	NA	NA
I_2022956	I	2022956	0.00411522	PC1	4.05719	0	NA	NA	NA	NA	NA	NA	NA	NA	NA
I_2024319	I	2024319	0.670764	PC1	4.05719	0	NA	NA	NA	NA	NA	NA	NA	NA	NA
I_2024909	I	2024909	0.755632	PC1	4.05719	0	NA	NA	NA	NA	NA	NA	NA	NA	NA
I_2025220	I	2025220	0.404043	PC1	4.05719	0	NA	NA	NA	NA	NA	NA	NA	NA	NA
I_2025243	I	2025243	0.772415	PC1	4.05719	0	NA	NA	NA	NA	NA	NA	NA	NA	NA
I_2026730	I	2026730	0.495716	PC1	4.05719	0	NA	NA	NA	NA	NA	NA	NA	NA	NA
I_2028947	I	2028947	0.268575	PC1	4.05719	0	NA	NA	NA	NA	NA	NA	NA	NA	NA
I_2029112	I	2029112	0.196934	PC1	4.05719	0	NA	NA	NA	NA	NA	NA	NA	NA	NA
I_2029345	I	2029345	0.139382	PC1	4.05719	0	NA	NA	NA	NA	NA	NA	NA	NA	NA
I_2030068	I	2030068	0.30414	PC1	4.05719	0	NA	NA	NA	NA	NA	NA	NA	NA	NA
I_2033181	I	2033181	0.510859	PC1	4.05719	0	NA	NA	NA	NA	NA	NA	NA	NA	NA
I_2034490	I	2034490	0.648377	PC1	4.05719	0	NA	NA	NA	NA	NA	NA	NA	NA	NA
I_2060555	I	2060555	0.92271	PC1	4.05719	0	NA	NA	NA	NA	NA	NA	NA	NA	NA
I_2061696	I	2061696	0.495405	PC1	4.05719	0	NA	NA	NA	NA	NA	NA	NA	NA	NA
I_2061840	I	2061840	0.755632	PC1	4.05719	0	NA	NA	NA	NA	NA	NA	NA	NA	NA
I_2062279	I	2062279	0.854687	PC1	4.05719	0	NA	NA	NA	NA	NA	NA	NA	NA	NA
I_2062734	I	2062734	0.176817	PC1	4.05719	0	NA	NA	NA	NA	NA	NA	NA	NA	NA
I_2066784	I	2066784	0.474726	PC1	4.05719	0	NA	NA	NA	NA	NA	NA	NA	NA	NA
I_2067700	I	2067700	0.35214	PC1	4.05719	0	NA	NA	NA	NA	NA	NA	NA	NA	NA
I_2068166	I	2068166	0.137825	PC1	4.05719	0	NA	NA	NA	NA	NA	NA	NA	NA	NA
I_2071258	I	2071258	1.01309	PC1	4.05719	0	NA	NA	NA	NA	NA	NA	NA	NA	NA
I_2073189	I	2073189	0.0969573	PC1	4.05719	0	NA	NA	NA	NA	NA	NA	NA	NA	NA
I_2075447	I	2075447	0.391489	PC1	4.05719	0	NA	NA	NA	NA	NA	NA	NA	NA	NA
I_2082931	I	2082931	0.202357	PC1	4.05719	0	NA	NA	NA	NA	NA	NA	NA	NA	NA
I_2085129	I	2085129	0.76673	PC1	4.05719	0	NA	NA	NA	NA	NA	NA	NA	NA	NA
I_2086683	I	2086683	0.420244	PC1	4.05719	0	NA	NA	NA	NA	NA	NA	NA	NA	NA
I_2086842	I	2086842	0.251862	PC1	4.05719	0	NA	NA	NA	NA	NA	NA	NA	NA	NA
I_2088219	I	2088219	0.416376	PC1	4.05719	0	NA	NA	NA	NA	NA	NA	NA	NA	NA
I_2088716	I	2088716	0.92271	PC1	4.05719	0	NA	NA	NA	NA	NA	NA	NA	NA	NA
I_2090527	I	2090527	0.893589	PC1	4.05719	0	NA	NA	NA	NA	NA	NA	NA	NA	NA
I_2092922	I	2092922	0.37292	PC1	4.05719	0	NA	NA	NA	NA	NA	NA	NA	NA	NA
I_2093294	I	2093294	0.572184	PC1	4.05719	0	NA	NA	NA	NA	NA	NA	NA	NA	NA
I_2093341	I	2093341	0.474726	PC1	4.05719	0	NA	NA	NA	NA	NA	NA	NA	NA	NA
I_2094215	I	2094215	0.613075	PC1	4.05719	0	NA	NA	NA	NA	NA	NA	NA	NA	NA
I_2095395	I	2095395	0.0438521	PC1	4.05719	0	NA	NA	NA	NA	NA	NA	NA	NA	NA
I_2100488	I	2100488	0.565542	PC1	4.05719	0	NA	NA	NA	NA	NA	NA	NA	NA	NA
I_2100737	I	2100737	0.755632	PC1	4.05719	0	NA	NA	NA	NA	NA	NA	NA	NA	NA
I_2100840	I	2100840	0.185894	PC1	4.05719	0	NA	NA	NA	NA	NA	NA	NA	NA	NA
I_2102058	I	2102058	0.218854	PC1	4.05719	0	NA	NA	NA	NA	NA	NA	NA	NA	NA
I_2102101	I	2102101	0.595159	PC1	4.05719	0	NA	NA	NA	NA	NA	NA	NA	NA	NA
I_2102313	I	2102313	0.205789	PC1	4.05719	0	NA	NA	NA	NA	NA	NA	NA	NA	NA
I_2102496	I	2102496	0.163637	PC1	4.05719	0	NA	NA	NA	NA	NA	NA	NA	NA	NA
I_2108680	I	2108680	0.0502441	PC1	4.05719	0	NA	NA	NA	NA	NA	NA	NA	NA	NA
I_2110467	I	2110467	0.381003	PC1	4.05719	0	NA	NA	NA	NA	NA	NA	NA	NA	NA
I_2110653	I	2110653	0.176817	PC1	4.05719	0	NA	NA	NA	NA	NA	NA	NA	NA	NA
I_2110681	I	2110681	0.640963	PC1	4.05719	0	NA	NA	NA	NA	NA	NA	NA	NA	NA
I_2111366	I	2111366	0.528376	PC1	4.05719	0	NA	NA	NA	NA	NA	NA	NA	NA	NA
I_2112342	I	2112342	1.36664	PC1	4.05719	0	NA	NA	NA	NA	NA	NA	NA	NA	NA
I_2114053	I	2114053	0.510859	PC1	4.05719	0	NA	NA	NA	NA	NA	NA	NA	NA	NA
I_2115511	I	2115511	0.0848365	PC1	4.05719	0	NA	NA	NA	NA	NA	NA	NA	NA	NA
I_2116239	I	2116239	0.391489	PC1	4.05719	0	NA	NA	NA	NA	NA	NA	NA	NA	NA
I_2118322	I	2118322	0.110886	PC1	4.05719	0	NA	NA	NA	NA	NA	NA	NA	NA	NA
I_2118471	I	2118471	0.0189473	PC1	4.05719	0	NA	NA	NA	NA	NA	NA	NA	NA	NA
I_2125151	I	2125151	0.442329	PC1	4.05719	0	NA	NA	NA	NA	NA	NA	NA	NA	NA
I_2134803	I	2134803	0.96845	PC1	4.05719	0	NA	NA	NA	NA	NA	NA	NA	NA	NA
I_2138645	I	2138645	0.322662	PC1	4.05719	0	NA	NA	NA	NA	NA	NA	NA	NA	NA
I_2140481	I	2140481	0.671465	PC1	4.05719	0	NA	NA	NA	NA	NA	NA	NA	NA	NA
I_2142174	I	2142174	0.0286678	PC1	4.05719	0	NA	NA	NA	NA	NA	NA	NA	NA	NA
I_2143993	I	2143993	0.588301	PC1	4.05719	0	NA	NA	NA	NA	NA	NA	NA	NA	NA
I_2145613	I	2145613	0.120477	PC1	4.05719	0	NA	NA	NA	NA	NA	NA	NA	NA	NA
I_2152579	I	2152579	1.14004	PC1	4.05719	0	NA	NA	NA	NA	NA	NA	NA	NA	NA
I_2156093	I	2156093	0.325356	PC1	4.05719	0	NA	NA	NA	NA	NA	NA	NA	NA	NA
I_2157010	I	2157010	0.0614128	PC1	4.05719	0	NA	NA	NA	NA	NA	NA	NA	NA	NA
I_2160112	I	2160112	0.268637	PC1	4.05719	0	NA	NA	NA	NA	NA	NA	NA	NA	NA
I_2162191	I	2162191	0.419301	PC1	4.05719	0	NA	NA	NA	NA	NA	NA	NA	NA	NA
I_2162237	I	2162237	0.688925	PC1	4.05719	0	NA	NA	NA	NA	NA	NA	NA	NA	NA
I_2162932	I	2162932	0.434504	PC1	4.05719	0	NA	NA	NA	NA	NA	NA	NA	NA	NA
I_2168301	I	2168301	0.327571	PC1	4.05719	0	NA	NA	NA	NA	NA	NA	NA	NA	NA
I_2168306	I	2168306	0.0305667	PC1	4.05719	0	NA	NA	NA	NA	NA	NA	NA	NA	NA
I_2169861	I	2169861	0.537245	PC1	4.05719	0	NA	NA	NA	NA	NA	NA	NA	NA	NA
I_2170257	I	2170257	0.883684	PC1	4.05719	0	NA	NA	NA	NA	NA	NA	NA	NA	NA
I_2170282	I	2170282	0.0226225	PC1	4.05719	0	NA	NA	NA	NA	NA	NA	NA	NA	NA
I_2170875	I	2170875	0.773639	PC1	4.05719	0	NA	NA	NA	NA	NA	NA	NA	NA	NA
I_2172048	I	2172048	0.877768	PC1	4.05719	0	NA	NA	NA	NA	NA	NA	NA	NA	NA
I_2172612	I	2172612	0.0539125	PC1	4.05719	0	NA	NA	NA	NA	NA	NA	NA	NA	NA
I_2173661	I	2173661	0.0459765	PC1	4.05719	0	NA	NA	NA	NA	NA	NA	NA	NA	NA
I_2179331	I	2179331	0.325889	PC1	4.05719	0	NA	NA	NA	NA	NA	NA	NA	NA	NA
I_2179497	I	2179497	0.438776	PC1	4.05719	0	NA	NA	NA	NA	NA	NA	NA	NA	NA
I_2179569	I	2179569	0.673889	PC1	4.05719	0	NA	NA	NA	NA	NA	NA	NA	NA	NA
I_2180260	I	2180260	0.510859	PC1	4.05719	0	NA	NA	NA	NA	NA	NA	NA	NA	NA
I_2183613	I	2183613	0.100285	PC1	4.05719	0	NA	NA	NA	NA	NA	NA	NA	NA	NA
I_2186078	I	2186078	0.395935	PC1	4.05719	0	NA	NA	NA	NA	NA	NA	NA	NA	NA
I_2186311	I	2186311	0.762748	PC1	4.05719	0	NA	NA	NA	NA	NA	NA	NA	NA	NA
I_2187602	I	2187602	0.207081	PC1	4.05719	0	NA	NA	NA	NA	NA	NA	NA	NA	NA
I_2190014	I	2190014	0.655804	PC1	4.05719	0	NA	NA	NA	NA	NA	NA	NA	NA	NA
I_2190063	I	2190063	0.246523	PC1	4.05719	0	NA	NA	NA	NA	NA	NA	NA	NA	NA
I_2190874	I	2190874	0.468517	PC1	4.05719	0	NA	NA	NA	NA	NA	NA	NA	NA	NA
I_2190978	I	2190978	0.338238	PC1	4.05719	0	NA	NA	NA	NA	NA	NA	NA	NA	NA
I_2192695	I	2192695	0.0811156	PC1	4.05719	0	NA	NA	NA	NA	NA	NA	NA	NA	NA
I_2194171	I	2194171	0.103702	PC1	4.05719	0	NA	NA	NA	NA	NA	NA	NA	NA	NA
I_2198393	I	2198393	0.328807	PC1	4.05719	0	NA	NA	NA	NA	NA	NA	NA	NA	NA
I_2198487	I	2198487	0.850217	PC1	4.05719	0	NA	NA	NA	NA	NA	NA	NA	NA	NA
I_2198927	I	2198927	0.020289	PC1	4.05719	0	NA	NA	NA	NA	NA	NA	NA	NA	NA
I_2199785	I	2199785	0.129767	PC1	4.05719	0	NA	NA	NA	NA	NA	NA	NA	NA	NA
I_2202996	I	2202996	0.18944	PC1	4.05719	0	NA	NA	NA	NA	NA	NA	NA	NA	NA
I_2203415	I	2203415	0.238037	PC1	4.05719	0	NA	NA	NA	NA	NA	NA	NA	NA	NA
I_2207769	I	2207769	1.17926	PC1	4.05719	0	NA	NA	NA	NA	NA	NA	NA	NA	NA
I_2210363	I	2210363	0.796262	PC1	4.05719	0	NA	NA	NA	NA	NA	NA	NA	NA	NA
I_2210564	I	2210564	1.36664	PC1	4.05719	0	NA	NA	NA	NA	NA	NA	NA	NA	NA
I_2211566	I	2211566	0.1361	PC1	4.05719	0	NA	NA	NA	NA	NA	NA	NA	NA	NA
I_2216296	I	2216296	1.12428	PC1	4.05719	0	NA	NA	NA	NA	NA	NA	NA	NA	NA
I_2219230	I	2219230	0.582538	PC1	4.05719	0	NA	NA	NA	NA	NA	NA	NA	NA	NA
I_2221814	I	2221814	0.27416	PC1	4.05719	0	NA	NA	NA	NA	NA	NA	NA	NA	NA
I_2224155	I	2224155	0.328807	PC1	4.05719	0	NA	NA	NA	NA	NA	NA	NA	NA	NA
I_2225016	I	2225016	0.134145	PC1	4.05719	0	NA	NA	NA	NA	NA	NA	NA	NA	NA
I_2226458	I	2226458	0.796262	PC1	4.05719	0	NA	NA	NA	NA	NA	NA	NA	NA	NA
I_2226503	I	2226503	1.36664	PC1	4.05719	0	NA	NA	NA	NA	NA	NA	NA	NA	NA
I_2227133	I	2227133	0.0258993	PC1	4.05719	0	NA	NA	NA	NA	NA	NA	NA	NA	NA
I_2227629	I	2227629	0.376128	PC1	4.05719	0	NA	NA	NA	NA	NA	NA	NA	NA	NA
I_2228326	I	2228326	0.327571	PC1	4.05719	0	NA	NA	NA	NA	NA	NA	NA	NA	NA
I_2228753	I	2228753	0.512983	PC1	4.05719	0	NA	NA	NA	NA	NA	NA	NA	NA	NA
I_2230008	I	2230008	0.538524	PC1	4.05719	0	NA	NA	NA	NA	NA	NA	NA	NA	NA
I_2230073	I	2230073	0.747401	PC1	4.05719	0	NA	NA	NA	NA	NA	NA	NA	NA	NA
I_2230277	I	2230277	1.50614	PC1	4.05719	0	NA	NA	NA	NA	NA	NA	NA	NA	NA
I_2231151	I	2231151	0.933509	PC1	4.05719	0	NA	NA	NA	NA	NA	NA	NA	NA	NA
I_2231400	I	2231400	0.31222	PC1	4.05719	0	NA	NA	NA	NA	NA	NA	NA	NA	NA
I_2231772	I	2231772	0.328807	PC1	4.05719	0	NA	NA	NA	NA	NA	NA	NA	NA	NA
I_2234856	I	2234856	0.583514	PC1	4.05719	0	NA	NA	NA	NA	NA	NA	NA	NA	NA
I_2235179	I	2235179	0.123035	PC1	4.05719	0	NA	NA	NA	NA	NA	NA	NA	NA	NA
I_2235244	I	2235244	0.1361	PC1	4.05719	0	NA	NA	NA	NA	NA	NA	NA	NA	NA
I_2236543	I	2236543	0.847291	PC1	4.05719	0	NA	NA	NA	NA	NA	NA	NA	NA	NA
I_2236810	I	2236810	1.36664	PC1	4.05719	0	NA	NA	NA	NA	NA	NA	NA	NA	NA
I_2236901	I	2236901	0.796262	PC1	4.05719	0	NA	NA	NA	NA	NA	NA	NA	NA	NA
I_2237532	I	2237532	0.429117	PC1	4.05719	0	NA	NA	NA	NA	NA	NA	NA	NA	NA
I_2237611	I	2237611	0.134145	PC1	4.05719	0	NA	NA	NA	NA	NA	NA	NA	NA	NA
I_2237686	I	2237686	0.272405	PC1	4.05719	0	NA	NA	NA	NA	NA	NA	NA	NA	NA
I_2239823	I	2239823	0.474726	PC1	4.05719	0	NA	NA	NA	NA	NA	NA	NA	NA	NA
I_2240878	I	2240878	0.773069	PC1	4.05719	0	NA	NA	NA	NA	NA	NA	NA	NA	NA
I_2241952	I	2241952	0.538524	PC1	4.05719	0	NA	NA	NA	NA	NA	NA	NA	NA	NA
I_2243334	I	2243334	0.476936	PC1	4.05719	0	NA	NA	NA	NA	NA	NA	NA	NA	NA
I_2244734	I	2244734	1.737	PC1	4.05719	0	NA	NA	NA	NA	NA	NA	NA	NA	NA
I_2245087	I	2245087	0.176803	PC1	4.05719	0	NA	NA	NA	NA	NA	NA	NA	NA	NA
I_2247498	I	2247498	0.297079	PC1	4.05719	0	NA	NA	NA	NA	NA	NA	NA	NA	NA
I_2249122	I	2249122	0.107288	PC1	4.05719	0	NA	NA	NA	NA	NA	NA	NA	NA	NA
I_2257541	I	2257541	0.108559	PC1	4.05719	0	NA	NA	NA	NA	NA	NA	NA	NA	NA
I_2260201	I	2260201	0.118331	PC1	4.05719	0	NA	NA	NA	NA	NA	NA	NA	NA	NA
I_2260930	I	2260930	0.474726	PC1	4.05719	0	NA	NA	NA	NA	NA	NA	NA	NA	NA
I_2261475	I	2261475	0.391489	PC1	4.05719	0	NA	NA	NA	NA	NA	NA	NA	NA	NA
I_2262539	I	2262539	0.208211	PC1	4.05719	0	NA	NA	NA	NA	NA	NA	NA	NA	NA
I_2264408	I	2264408	0.773069	PC1	4.05719	0	NA	NA	NA	NA	NA	NA	NA	NA	NA
I_2265598	I	2265598	0.409896	PC1	4.05719	0	NA	NA	NA	NA	NA	NA	NA	NA	NA
I_2265955	I	2265955	0.0258993	PC1	4.05719	0	NA	NA	NA	NA	NA	NA	NA	NA	NA
I_2269627	I	2269627	0.203006	PC1	4.05719	0	NA	NA	NA	NA	NA	NA	NA	NA	NA
I_2270286	I	2270286	0.297079	PC1	4.05719	0	NA	NA	NA	NA	NA	NA	NA	NA	NA
I_2270643	I	2270643	0.733558	PC1	4.05719	0	NA	NA	NA	NA	NA	NA	NA	NA	NA
I_2271369	I	2271369	0.627266	PC1	4.05719	0	NA	NA	NA	NA	NA	NA	NA	NA	NA
I_2273828	I	2273828	0.680897	PC1	4.05719	0	NA	NA	NA	NA	NA	NA	NA	NA	NA
I_2273911	I	2273911	0.0645273	PC1	4.05719	0	NA	NA	NA	NA	NA	NA	NA	NA	NA
I_2276500	I	2276500	0.59825	PC1	4.05719	0	NA	NA	NA	NA	NA	NA	NA	NA	NA
I_2278049	I	2278049	0.391489	PC1	4.05719	0	NA	NA	NA	NA	NA	NA	NA	NA	NA
I_2280193	I	2280193	0.0258993	PC1	4.05719	0	NA	NA	NA	NA	NA	NA	NA	NA	NA
I_2282245	I	2282245	0.0579832	PC1	4.05719	0	NA	NA	NA	NA	NA	NA	NA	NA	NA
I_2282340	I	2282340	0.109787	PC1	4.05719	0	NA	NA	NA	NA	NA	NA	NA	NA	NA
I_2284924	I	2284924	1.22035	PC1	4.05719	0	NA	NA	NA	NA	NA	NA	NA	NA	NA
I_2284930	I	2284930	0.431967	PC1	4.05719	0	NA	NA	NA	NA	NA	NA	NA	NA	NA
I_2291600	I	2291600	1.01309	PC1	4.05719	0	NA	NA	NA	NA	NA	NA	NA	NA	NA
I_2295276	I	2295276	0.0377033	PC1	4.05719	0	NA	NA	NA	NA	NA	NA	NA	NA	NA
I_2297636	I	2297636	0.464779	PC1	4.05719	0	NA	NA	NA	NA	NA	NA	NA	NA	NA
I_2297746	I	2297746	0.585493	PC1	4.05719	0	NA	NA	NA	NA	NA	NA	NA	NA	NA
I_2298778	I	2298778	0.31409	PC1	4.05719	0	NA	NA	NA	NA	NA	NA	NA	NA	NA
I_2299656	I	2299656	0.108559	PC1	4.05719	0	NA	NA	NA	NA	NA	NA	NA	NA	NA
I_2299738	I	2299738	0.14445	PC1	4.05719	0	NA	NA	NA	NA	NA	NA	NA	NA	NA
I_2307149	I	2307149	0.474726	PC1	4.05719	0	NA	NA	NA	NA	NA	NA	NA	NA	NA
I_2309623	I	2309623	0.17088	PC1	4.05719	0	NA	NA	NA	NA	NA	NA	NA	NA	NA
I_2310074	I	2310074	0.177965	PC1	4.05719	0	NA	NA	NA	NA	NA	NA	NA	NA	NA
I_2310939	I	2310939	0.391489	PC1	4.05719	0	NA	NA	NA	NA	NA	NA	NA	NA	NA
I_2312242	I	2312242	0.0258993	PC1	4.05719	0	NA	NA	NA	NA	NA	NA	NA	NA	NA
I_2312495	I	2312495	1.22035	PC1	4.05719	0	NA	NA	NA	NA	NA	NA	NA	NA	NA
I_2312629	I	2312629	0.0265663	PC1	4.05719	0	NA	NA	NA	NA	NA	NA	NA	NA	NA
I_2315608	I	2315608	0.464779	PC1	4.05719	0	NA	NA	NA	NA	NA	NA	NA	NA	NA
I_2317195	I	2317195	1.01309	PC1	4.05719	0	NA	NA	NA	NA	NA	NA	NA	NA	NA
I_2317426	I	2317426	0.203006	PC1	4.05719	0	NA	NA	NA	NA	NA	NA	NA	NA	NA
I_2323298	I	2323298	0.869396	PC1	4.05719	0	NA	NA	NA	NA	NA	NA	NA	NA	NA
I_2324039	I	2324039	0.936435	PC1	4.05719	0	NA	NA	NA	NA	NA	NA	NA	NA	NA
I_2324491	I	2324491	0.385264	PC1	4.05719	0	NA	NA	NA	NA	NA	NA	NA	NA	NA
I_2325022	I	2325022	0.710982	PC1	4.05719	0	NA	NA	NA	NA	NA	NA	NA	NA	NA
I_2325367	I	2325367	0.391489	PC1	4.05719	0	NA	NA	NA	NA	NA	NA	NA	NA	NA
I_2329102	I	2329102	0.215461	PC1	4.05719	0	NA	NA	NA	NA	NA	NA	NA	NA	NA
I_2329917	I	2329917	0.464779	PC1	4.05719	0	NA	NA	NA	NA	NA	NA	NA	NA	NA
I_2330498	I	2330498	1.22035	PC1	4.05719	0	NA	NA	NA	NA	NA	NA	NA	NA	NA
I_2330986	I	2330986	0.534404	PC1	4.05719	0	NA	NA	NA	NA	NA	NA	NA	NA	NA
I_2333162	I	2333162	0.26107	PC1	4.05719	0	NA	NA	NA	NA	NA	NA	NA	NA	NA
I_2333917	I	2333917	0.0927882	PC1	4.05719	0	NA	NA	NA	NA	NA	NA	NA	NA	NA
I_2337494	I	2337494	0.26107	PC1	4.05719	0	NA	NA	NA	NA	NA	NA	NA	NA	NA
I_2357768	I	2357768	0.373545	PC1	4.05719	0	NA	NA	NA	NA	NA	NA	NA	NA	NA
I_2359896	I	2359896	0.225198	PC1	4.05719	0	NA	NA	NA	NA	NA	NA	NA	NA	NA
I_2359948	I	2359948	0.0426655	PC1	4.05719	0	NA	NA	NA	NA	NA	NA	NA	NA	NA
I_2359992	I	2359992	0.464779	PC1	4.05719	0	NA	NA	NA	NA	NA	NA	NA	NA	NA
I_2369248	I	2369248	0.391489	PC1	4.05719	0	NA	NA	NA	NA	NA	NA	NA	NA	NA
I_2370581	I	2370581	0.14964	PC1	4.05719	0	NA	NA	NA	NA	NA	NA	NA	NA	NA
I_2373940	I	2373940	1.15543	PC1	4.05719	0	NA	NA	NA	NA	NA	NA	NA	NA	NA
I_2374176	I	2374176	0.835149	PC1	4.05719	0	NA	NA	NA	NA	NA	NA	NA	NA	NA
I_2375574	I	2375574	0.279308	PC1	4.05719	0	NA	NA	NA	NA	NA	NA	NA	NA	NA
I_2384912	I	2384912	0.530612	PC1	4.05719	0	NA	NA	NA	NA	NA	NA	NA	NA	NA
I_2386021	I	2386021	0.306319	PC1	4.05719	0	NA	NA	NA	NA	NA	NA	NA	NA	NA
I_2386041	I	2386041	0.146857	PC1	4.05719	0	NA	NA	NA	NA	NA	NA	NA	NA	NA
I_2386469	I	2386469	0.705011	PC1	4.05719	0	NA	NA	NA	NA	NA	NA	NA	NA	NA
I_2386495	I	2386495	0.371348	PC1	4.05719	0	NA	NA	NA	NA	NA	NA	NA	NA	NA
I_2386545	I	2386545	0.0265663	PC1	4.05719	0	NA	NA	NA	NA	NA	NA	NA	NA	NA
I_2387555	I	2387555	0.188776	PC1	4.05719	0	NA	NA	NA	NA	NA	NA	NA	NA	NA
I_2390689	I	2390689	0.039185	PC1	4.05719	0	NA	NA	NA	NA	NA	NA	NA	NA	NA
I_2391083	I	2391083	0.323413	PC1	4.05719	0	NA	NA	NA	NA	NA	NA	NA	NA	NA
I_2393626	I	2393626	0.615454	PC1	4.05719	0	NA	NA	NA	NA	NA	NA	NA	NA	NA
I_2393645	I	2393645	0.161843	PC1	4.05719	0	NA	NA	NA	NA	NA	NA	NA	NA	NA
I_2393726	I	2393726	0.17088	PC1	4.05719	0	NA	NA	NA	NA	NA	NA	NA	NA	NA
I_2394565	I	2394565	0.300358	PC1	4.05719	0	NA	NA	NA	NA	NA	NA	NA	NA	NA
I_2396163	I	2396163	0.637391	PC1	4.05719	0	NA	NA	NA	NA	NA	NA	NA	NA	NA
I_2402433	I	2402433	0.174976	PC1	4.05719	0	NA	NA	NA	NA	NA	NA	NA	NA	NA
I_2402512	I	2402512	0.568728	PC1	4.05719	0	NA	NA	NA	NA	NA	NA	NA	NA	NA
I_2403348	I	2403348	0.0200813	PC1	4.05719	0	NA	NA	NA	NA	NA	NA	NA	NA	NA
I_2404637	I	2404637	0.095708	PC1	4.05719	0	NA	NA	NA	NA	NA	NA	NA	NA	NA
I_2405043	I	2405043	0.409587	PC1	4.05719	0	NA	NA	NA	NA	NA	NA	NA	NA	NA
I_2406650	I	2406650	0.298927	PC1	4.05719	0	NA	NA	NA	NA	NA	NA	NA	NA	NA
I_2407972	I	2407972	0.123146	PC1	4.05719	0	NA	NA	NA	NA	NA	NA	NA	NA	NA
I_2408324	I	2408324	0.659204	PC1	4.05719	0	NA	NA	NA	NA	NA	NA	NA	NA	NA
I_2408396	I	2408396	0.0698725	PC1	4.05719	0	NA	NA	NA	NA	NA	NA	NA	NA	NA
I_2409508	I	2409508	0.238079	PC1	4.05719	0	NA	NA	NA	NA	NA	NA	NA	NA	NA
I_2409636	I	2409636	0.464884	PC1	4.05719	0	NA	NA	NA	NA	NA	NA	NA	NA	NA
I_2410306	I	2410306	0.595837	PC1	4.05719	0	NA	NA	NA	NA	NA	NA	NA	NA	NA
I_2410324	I	2410324	1.08554	PC1	4.05719	0	NA	NA	NA	NA	NA	NA	NA	NA	NA
I_2412428	I	2412428	0.18448	PC1	4.05719	0	NA	NA	NA	NA	NA	NA	NA	NA	NA
I_2414561	I	2414561	0.0286715	PC1	4.05719	0	NA	NA	NA	NA	NA	NA	NA	NA	NA
I_2415014	I	2415014	0.528937	PC1	4.05719	0	NA	NA	NA	NA	NA	NA	NA	NA	NA
I_2415078	I	2415078	0.60144	PC1	4.05719	0	NA	NA	NA	NA	NA	NA	NA	NA	NA
I_2415282	I	2415282	0.0698725	PC1	4.05719	0	NA	NA	NA	NA	NA	NA	NA	NA	NA
I_2415818	I	2415818	0.17514	PC1	4.05719	0	NA	NA	NA	NA	NA	NA	NA	NA	NA
I_2416262	I	2416262	0.238079	PC1	4.05719	0	NA	NA	NA	NA	NA	NA	NA	NA	NA
I_2417308	I	2417308	0.568728	PC1	4.05719	0	NA	NA	NA	NA	NA	NA	NA	NA	NA
I_2417487	I	2417487	0.2897	PC1	4.05719	0	NA	NA	NA	NA	NA	NA	NA	NA	NA
I_2417891	I	2417891	0.0925185	PC1	4.05719	0	NA	NA	NA	NA	NA	NA	NA	NA	NA
I_2418015	I	2418015	0.0186031	PC1	4.05719	0	NA	NA	NA	NA	NA	NA	NA	NA	NA
I_2421753	I	2421753	0.781929	PC1	4.05719	0	NA	NA	NA	NA	NA	NA	NA	NA	NA
I_2421818	I	2421818	0.40599	PC1	4.05719	0	NA	NA	NA	NA	NA	NA	NA	NA	NA
I_2421954	I	2421954	0.391489	PC1	4.05719	0	NA	NA	NA	NA	NA	NA	NA	NA	NA
I_2423687	I	2423687	0.17514	PC1	4.05719	0	NA	NA	NA	NA	NA	NA	NA	NA	NA
I_2429630	I	2429630	0.820324	PC1	4.05719	0	NA	NA	NA	NA	NA	NA	NA	NA	NA
I_2433505	I	2433505	0.0698725	PC1	4.05719	0	NA	NA	NA	NA	NA	NA	NA	NA	NA
I_2433866	I	2433866	0.115743	PC1	4.05719	0	NA	NA	NA	NA	NA	NA	NA	NA	NA
I_2434057	I	2434057	0.427768	PC1	4.05719	0	NA	NA	NA	NA	NA	NA	NA	NA	NA
I_2435519	I	2435519	0.000766809	PC1	4.05719	0	NA	NA	NA	NA	NA	NA	NA	NA	NA
I_2435521	I	2435521	0.231804	PC1	4.05719	0	NA	NA	NA	NA	NA	NA	NA	NA	NA
I_2435522	I	2435522	0.0228355	PC1	4.05719	0	NA	NA	NA	NA	NA	NA	NA	NA	NA
I_2437731	I	2437731	0.0886359	PC1	4.05719	0	NA	NA	NA	NA	NA	NA	NA	NA	NA
I_2438827	I	2438827	0.118091	PC1	4.05719	0	NA	NA	NA	NA	NA	NA	NA	NA	NA
I_2438949	I	2438949	0.391489	PC1	4.05719	0	NA	NA	NA	NA	NA	NA	NA	NA	NA
I_2440923	I	2440923	0.00261041	PC1	4.05719	0	NA	NA	NA	NA	NA	NA	NA	NA	NA
I_2441030	I	2441030	1.04174	PC1	4.05719	0	NA	NA	NA	NA	NA	NA	NA	NA	NA
I_2441151	I	2441151	0.228268	PC1	4.05719	0	NA	NA	NA	NA	NA	NA	NA	NA	NA
I_2442877	I	2442877	0.0739348	PC1	4.05719	0	NA	NA	NA	NA	NA	NA	NA	NA	NA
I_2443787	I	2443787	0.115743	PC1	4.05719	0	NA	NA	NA	NA	NA	NA	NA	NA	NA
I_2444452	I	2444452	0.0698725	PC1	4.05719	0	NA	NA	NA	NA	NA	NA	NA	NA	NA
I_2446003	I	2446003	0.34353	PC1	4.05719	0	NA	NA	NA	NA	NA	NA	NA	NA	NA
I_2447232	I	2447232	0.0547234	PC1	4.05719	0	NA	NA	NA	NA	NA	NA	NA	NA	NA
I_2447922	I	2447922	0.955913	PC1	4.05719	0	NA	NA	NA	NA	NA	NA	NA	NA	NA
I_2448780	I	2448780	0.427768	PC1	4.05719	0	NA	NA	NA	NA	NA	NA	NA	NA	NA
I_2451164	I	2451164	0.229188	PC1	4.05719	0	NA	NA	NA	NA	NA	NA	NA	NA	NA
I_2452509	I	2452509	0.365366	PC1	4.05719	0	NA	NA	NA	NA	NA	NA	NA	NA	NA
I_2452512	I	2452512	0.0741063	PC1	4.05719	0	NA	NA	NA	NA	NA	NA	NA	NA	NA
I_2452928	I	2452928	0.371202	PC1	4.05719	0	NA	NA	NA	NA	NA	NA	NA	NA	NA
I_2454099	I	2454099	0.252363	PC1	4.05719	0	NA	NA	NA	NA	NA	NA	NA	NA	NA
I_2455991	I	2455991	0.680321	PC1	4.05719	0	NA	NA	NA	NA	NA	NA	NA	NA	NA
I_2457298	I	2457298	0.230502	PC1	4.05719	0	NA	NA	NA	NA	NA	NA	NA	NA	NA
I_2457582	I	2457582	0.93959	PC1	4.05719	0	NA	NA	NA	NA	NA	NA	NA	NA	NA
I_2459636	I	2459636	0.468355	PC1	4.05719	0	NA	NA	NA	NA	NA	NA	NA	NA	NA
I_2461358	I	2461358	0.251926	PC1	4.05719	0	NA	NA	NA	NA	NA	NA	NA	NA	NA
I_2463037	I	2463037	0.400773	PC1	4.05719	0	NA	NA	NA	NA	NA	NA	NA	NA	NA
I_2463277	I	2463277	0.334804	PC1	4.05719	0	NA	NA	NA	NA	NA	NA	NA	NA	NA
I_2474138	I	2474138	0.0749963	PC1	4.05719	0	NA	NA	NA	NA	NA	NA	NA	NA	NA
I_2474219	I	2474219	0.25749	PC1	4.05719	0	NA	NA	NA	NA	NA	NA	NA	NA	NA
I_2475864	I	2475864	0.179268	PC1	4.05719	0	NA	NA	NA	NA	NA	NA	NA	NA	NA
I_2481312	I	2481312	0.32254	PC1	4.05719	0	NA	NA	NA	NA	NA	NA	NA	NA	NA
I_2485346	I	2485346	0.276381	PC1	4.05719	0	NA	NA	NA	NA	NA	NA	NA	NA	NA
I_2485628	I	2485628	0.145201	PC1	4.05719	0	NA	NA	NA	NA	NA	NA	NA	NA	NA
I_2488352	I	2488352	0.297021	PC1	4.05719	0	NA	NA	NA	NA	NA	NA	NA	NA	NA
I_2491553	I	2491553	0.562703	PC1	4.05719	0	NA	NA	NA	NA	NA	NA	NA	NA	NA
I_2492844	I	2492844	0.635861	PC1	4.05719	0	NA	NA	NA	NA	NA	NA	NA	NA	NA
I_2495382	I	2495382	0.284294	PC1	4.05719	0	NA	NA	NA	NA	NA	NA	NA	NA	NA
I_2499719	I	2499719	0.549871	PC1	4.05719	0	NA	NA	NA	NA	NA	NA	NA	NA	NA
I_2499835	I	2499835	0.819602	PC1	4.05719	0	NA	NA	NA	NA	NA	NA	NA	NA	NA
I_2499909	I	2499909	0.121435	PC1	4.05719	0	NA	NA	NA	NA	NA	NA	NA	NA	NA
I_2500102	I	2500102	0.615133	PC1	4.05719	0	NA	NA	NA	NA	NA	NA	NA	NA	NA
I_2502049	I	2502049	0.0403595	PC1	4.05719	0	NA	NA	NA	NA	NA	NA	NA	NA	NA
I_2502497	I	2502497	0.0613307	PC1	4.05719	0	NA	NA	NA	NA	NA	NA	NA	NA	NA
I_2502501	I	2502501	0.291204	PC1	4.05719	0	NA	NA	NA	NA	NA	NA	NA	NA	NA
I_2504331	I	2504331	0.0946822	PC1	4.05719	0	NA	NA	NA	NA	NA	NA	NA	NA	NA
I_2505659	I	2505659	0.0487089	PC1	4.05719	0	NA	NA	NA	NA	NA	NA	NA	NA	NA
I_2506406	I	2506406	0.170947	PC1	4.05719	0	NA	NA	NA	NA	NA	NA	NA	NA	NA
I_2506559	I	2506559	0.399908	PC1	4.05719	0	NA	NA	NA	NA	NA	NA	NA	NA	NA
I_2506636	I	2506636	0.814855	PC1	4.05719	0	NA	NA	NA	NA	NA	NA	NA	NA	NA
I_2508199	I	2508199	0.372875	PC1	4.05719	0	NA	NA	NA	NA	NA	NA	NA	NA	NA
I_2513879	I	2513879	0.167037	PC1	4.05719	0	NA	NA	NA	NA	NA	NA	NA	NA	NA
I_2514546	I	2514546	0.711349	PC1	4.05719	0	NA	NA	NA	NA	NA	NA	NA	NA	NA
I_2515032	I	2515032	0.251926	PC1	4.05719	0	NA	NA	NA	NA	NA	NA	NA	NA	NA
I_2515738	I	2515738	1.06144	PC1	4.05719	0	NA	NA	NA	NA	NA	NA	NA	NA	NA
I_2520074	I	2520074	0.7984	PC1	4.05719	0	NA	NA	NA	NA	NA	NA	NA	NA	NA
I_2522142	I	2522142	0.380122	PC1	4.05719	0	NA	NA	NA	NA	NA	NA	NA	NA	NA
I_2525398	I	2525398	0.676825	PC1	4.05719	0	NA	NA	NA	NA	NA	NA	NA	NA	NA
I_2526193	I	2526193	1.37084	PC1	4.05719	0	NA	NA	NA	NA	NA	NA	NA	NA	NA
I_2527407	I	2527407	0.465848	PC1	4.05719	0	NA	NA	NA	NA	NA	NA	NA	NA	NA
I_2529627	I	2529627	0.259697	PC1	4.05719	0	NA	NA	NA	NA	NA	NA	NA	NA	NA
I_2529719	I	2529719	0.110997	PC1	4.05719	0	NA	NA	NA	NA	NA	NA	NA	NA	NA
I_2530227	I	2530227	0.882757	PC1	4.05719	0	NA	NA	NA	NA	NA	NA	NA	NA	NA
I_2531089	I	2531089	0.296971	PC1	4.05719	0	NA	NA	NA	NA	NA	NA	NA	NA	NA
I_2533987	I	2533987	0.206645	PC1	4.05719	0	NA	NA	NA	NA	NA	NA	NA	NA	NA
I_2534039	I	2534039	0.749562	PC1	4.05719	0	NA	NA	NA	NA	NA	NA	NA	NA	NA
I_2534153	I	2534153	0.327908	PC1	4.05719	0	NA	NA	NA	NA	NA	NA	NA	NA	NA
I_2535188	I	2535188	0.00331949	PC1	4.05719	0	NA	NA	NA	NA	NA	NA	NA	NA	NA
I_2535189	I	2535189	0.204365	PC1	4.05719	0	NA	NA	NA	NA	NA	NA	NA	NA	NA
I_2535580	I	2535580	0.167037	PC1	4.05719	0	NA	NA	NA	NA	NA	NA	NA	NA	NA
I_2535596	I	2535596	0.6771	PC1	4.05719	0	NA	NA	NA	NA	NA	NA	NA	NA	NA
I_2535798	I	2535798	0.411304	PC1	4.05719	0	NA	NA	NA	NA	NA	NA	NA	NA	NA
I_2536314	I	2536314	0.0564412	PC1	4.05719	0	NA	NA	NA	NA	NA	NA	NA	NA	NA
I_2536410	I	2536410	0.488785	PC1	4.05719	0	NA	NA	NA	NA	NA	NA	NA	NA	NA
I_2539144	I	2539144	1.01268	PC1	4.05719	0	NA	NA	NA	NA	NA	NA	NA	NA	NA
I_2539595	I	2539595	0.185806	PC1	4.05719	0	NA	NA	NA	NA	NA	NA	NA	NA	NA
I_2539856	I	2539856	0.296302	PC1	4.05719	0	NA	NA	NA	NA	NA	NA	NA	NA	NA
I_2541680	I	2541680	0.296971	PC1	4.05719	0	NA	NA	NA	NA	NA	NA	NA	NA	NA
I_2545444	I	2545444	0.939611	PC1	4.05719	0	NA	NA	NA	NA	NA	NA	NA	NA	NA
I_2545533	I	2545533	0.762678	PC1	4.05719	0	NA	NA	NA	NA	NA	NA	NA	NA	NA
I_2546154	I	2546154	0.128002	PC1	4.05719	0	NA	NA	NA	NA	NA	NA	NA	NA	NA
I_2547344	I	2547344	0.167037	PC1	4.05719	0	NA	NA	NA	NA	NA	NA	NA	NA	NA
I_2548402	I	2548402	1.05743	PC1	4.05719	0	NA	NA	NA	NA	NA	NA	NA	NA	NA
I_2548408	I	2548408	0.486144	PC1	4.05719	0	NA	NA	NA	NA	NA	NA	NA	NA	NA
I_2550196	I	2550196	0.824028	PC1	4.05719	0	NA	NA	NA	NA	NA	NA	NA	NA	NA
I_2551409	I	2551409	0.46609	PC1	4.05719	0	NA	NA	NA	NA	NA	NA	NA	NA	NA
I_2551534	I	2551534	0.90579	PC1	4.05719	0	NA	NA	NA	NA	NA	NA	NA	NA	NA
I_2555109	I	2555109	0.296971	PC1	4.05719	0	NA	NA	NA	NA	NA	NA	NA	NA	NA
I_2556208	I	2556208	0.142889	PC1	4.05719	0	NA	NA	NA	NA	NA	NA	NA	NA	NA
I_2556319	I	2556319	0.460865	PC1	4.05719	0	NA	NA	NA	NA	NA	NA	NA	NA	NA
I_2558498	I	2558498	0.167037	PC1	4.05719	0	NA	NA	NA	NA	NA	NA	NA	NA	NA
I_2558789	I	2558789	0.79665	PC1	4.05719	0	NA	NA	NA	NA	NA	NA	NA	NA	NA
I_2558804	I	2558804	0.824028	PC1	4.05719	0	NA	NA	NA	NA	NA	NA	NA	NA	NA
I_2560442	I	2560442	0.211827	PC1	4.05719	0	NA	NA	NA	NA	NA	NA	NA	NA	NA
I_2561005	I	2561005	0.167037	PC1	4.05719	0	NA	NA	NA	NA	NA	NA	NA	NA	NA
I_2561261	I	2561261	1.20562	PC1	4.05719	0	NA	NA	NA	NA	NA	NA	NA	NA	NA
I_2561952	I	2561952	0.684763	PC1	4.05719	0	NA	NA	NA	NA	NA	NA	NA	NA	NA
I_2561962	I	2561962	1.03595	PC1	4.05719	0	NA	NA	NA	NA	NA	NA	NA	NA	NA
I_2562473	I	2562473	0.0564412	PC1	4.05719	0	NA	NA	NA	NA	NA	NA	NA	NA	NA
I_2562521	I	2562521	0.0726559	PC1	4.05719	0	NA	NA	NA	NA	NA	NA	NA	NA	NA
I_2562557	I	2562557	0.296971	PC1	4.05719	0	NA	NA	NA	NA	NA	NA	NA	NA	NA
I_2562945	I	2562945	0.311668	PC1	4.05719	0	NA	NA	NA	NA	NA	NA	NA	NA	NA
I_2563206	I	2563206	0.373092	PC1	4.05719	0	NA	NA	NA	NA	NA	NA	NA	NA	NA
I_2563869	I	2563869	0.107288	PC1	4.05719	0	NA	NA	NA	NA	NA	NA	NA	NA	NA
I_2564783	I	2564783	0.167037	PC1	4.05719	0	NA	NA	NA	NA	NA	NA	NA	NA	NA
I_2565493	I	2565493	0.0266126	PC1	4.05719	0	NA	NA	NA	NA	NA	NA	NA	NA	NA
I_2566152	I	2566152	0.134508	PC1	4.05719	0	NA	NA	NA	NA	NA	NA	NA	NA	NA
I_2568037	I	2568037	0.147399	PC1	4.05719	0	NA	NA	NA	NA	NA	NA	NA	NA	NA
I_2568366	I	2568366	0.0564412	PC1	4.05719	0	NA	NA	NA	NA	NA	NA	NA	NA	NA
I_2569086	I	2569086	0.356018	PC1	4.05719	0	NA	NA	NA	NA	NA	NA	NA	NA	NA
I_2569672	I	2569672	0.286504	PC1	4.05719	0	NA	NA	NA	NA	NA	NA	NA	NA	NA
I_2571357	I	2571357	1.15002	PC1	4.05719	0	NA	NA	NA	NA	NA	NA	NA	NA	NA
I_2571407	I	2571407	0.296971	PC1	4.05719	0	NA	NA	NA	NA	NA	NA	NA	NA	NA
I_2571411	I	2571411	0.532474	PC1	4.05719	0	NA	NA	NA	NA	NA	NA	NA	NA	NA
I_2571723	I	2571723	0.544638	PC1	4.05719	0	NA	NA	NA	NA	NA	NA	NA	NA	NA
I_2572477	I	2572477	0.814467	PC1	4.05719	0	NA	NA	NA	NA	NA	NA	NA	NA	NA
I_2572992	I	2572992	0.785467	PC1	4.05719	0	NA	NA	NA	NA	NA	NA	NA	NA	NA
I_2576408	I	2576408	0.167037	PC1	4.05719	0	NA	NA	NA	NA	NA	NA	NA	NA	NA
I_2577499	I	2577499	0.707288	PC1	4.05719	0	NA	NA	NA	NA	NA	NA	NA	NA	NA
I_2578497	I	2578497	0.655954	PC1	4.05719	0	NA	NA	NA	NA	NA	NA	NA	NA	NA
I_2579235	I	2579235	0.201551	PC1	4.05719	0	NA	NA	NA	NA	NA	NA	NA	NA	NA
I_2579871	I	2579871	0.296971	PC1	4.05719	0	NA	NA	NA	NA	NA	NA	NA	NA	NA
I_2580256	I	2580256	0.785467	PC1	4.05719	0	NA	NA	NA	NA	NA	NA	NA	NA	NA
I_2582707	I	2582707	0.200294	PC1	4.05719	0	NA	NA	NA	NA	NA	NA	NA	NA	NA
I_2584669	I	2584669	0.513495	PC1	4.05719	0	NA	NA	NA	NA	NA	NA	NA	NA	NA
I_2586672	I	2586672	0.496426	PC1	4.05719	0	NA	NA	NA	NA	NA	NA	NA	NA	NA
I_2587176	I	2587176	0.0367879	PC1	4.05719	0	NA	NA	NA	NA	NA	NA	NA	NA	NA
I_2587205	I	2587205	0.439641	PC1	4.05719	0	NA	NA	NA	NA	NA	NA	NA	NA	NA
I_2587285	I	2587285	0.136093	PC1	4.05719	0	NA	NA	NA	NA	NA	NA	NA	NA	NA
I_2588623	I	2588623	0.0102102	PC1	4.05719	0	NA	NA	NA	NA	NA	NA	NA	NA	NA
I_2588704	I	2588704	0.0657766	PC1	4.05719	0	NA	NA	NA	NA	NA	NA	NA	NA	NA
I_2591424	I	2591424	0.408456	PC1	4.05719	0	NA	NA	NA	NA	NA	NA	NA	NA	NA
I_2591521	I	2591521	0.843418	PC1	4.05719	0	NA	NA	NA	NA	NA	NA	NA	NA	NA
I_2591578	I	2591578	0.134001	PC1	4.05719	0	NA	NA	NA	NA	NA	NA	NA	NA	NA
I_2592355	I	2592355	0.0382781	PC1	4.05719	0	NA	NA	NA	NA	NA	NA	NA	NA	NA
I_2593364	I	2593364	0.197477	PC1	4.05719	0	NA	NA	NA	NA	NA	NA	NA	NA	NA
I_2593422	I	2593422	0.117719	PC1	4.05719	0	NA	NA	NA	NA	NA	NA	NA	NA	NA
I_2594023	I	2594023	0.0471066	PC1	4.05719	0	NA	NA	NA	NA	NA	NA	NA	NA	NA
I_2594098	I	2594098	5.96074e-05	PC1	4.05719	0	NA	NA	NA	NA	NA	NA	NA	NA	NA
I_2594661	I	2594661	0.214216	PC1	4.05719	0	NA	NA	NA	NA	NA	NA	NA	NA	NA
I_2594698	I	2594698	0.164959	PC1	4.05719	0	NA	NA	NA	NA	NA	NA	NA	NA	NA
I_2601493	I	2601493	0.0760787	PC1	4.05719	0	NA	NA	NA	NA	NA	NA	NA	NA	NA
I_2602327	I	2602327	0.178491	PC1	4.05719	0	NA	NA	NA	NA	NA	NA	NA	NA	NA
I_2603764	I	2603764	0.15896	PC1	4.05719	0	NA	NA	NA	NA	NA	NA	NA	NA	NA
I_2603769	I	2603769	0.549876	PC1	4.05719	0	NA	NA	NA	NA	NA	NA	NA	NA	NA
I_2604074	I	2604074	0.255575	PC1	4.05719	0	NA	NA	NA	NA	NA	NA	NA	NA	NA
I_2604212	I	2604212	0.523346	PC1	4.05719	0	NA	NA	NA	NA	NA	NA	NA	NA	NA
I_2607200	I	2607200	0.154324	PC1	4.05719	0	NA	NA	NA	NA	NA	NA	NA	NA	NA
I_2608323	I	2608323	0.185196	PC1	4.05719	0	NA	NA	NA	NA	NA	NA	NA	NA	NA
I_2608857	I	2608857	0.0703264	PC1	4.05719	0	NA	NA	NA	NA	NA	NA	NA	NA	NA
I_2613141	I	2613141	0.0585276	PC1	4.05719	0	NA	NA	NA	NA	NA	NA	NA	NA	NA
I_2613981	I	2613981	0.0640799	PC1	4.05719	0	NA	NA	NA	NA	NA	NA	NA	NA	NA
I_2615044	I	2615044	0.282475	PC1	4.05719	0	NA	NA	NA	NA	NA	NA	NA	NA	NA
I_2615064	I	2615064	0.412351	PC1	4.05719	0	NA	NA	NA	NA	NA	NA	NA	NA	NA
I_2616658	I	2616658	0.167037	PC1	4.05719	0	NA	NA	NA	NA	NA	NA	NA	NA	NA
I_2620495	I	2620495	0.188591	PC1	4.05719	0	NA	NA	NA	NA	NA	NA	NA	NA	NA
I_2622177	I	2622177	0.131176	PC1	4.05719	0	NA	NA	NA	NA	NA	NA	NA	NA	NA
I_2622358	I	2622358	0.313949	PC1	4.05719	0	NA	NA	NA	NA	NA	NA	NA	NA	NA
I_2626847	I	2626847	0.0456492	PC1	4.05719	0	NA	NA	NA	NA	NA	NA	NA	NA	NA
I_2626895	I	2626895	0.0246342	PC1	4.05719	0	NA	NA	NA	NA	NA	NA	NA	NA	NA
I_2626961	I	2626961	0.0142339	PC1	4.05719	0	NA	NA	NA	NA	NA	NA	NA	NA	NA
I_2631289	I	2631289	0.0696429	PC1	4.05719	0	NA	NA	NA	NA	NA	NA	NA	NA	NA
I_2638525	I	2638525	0.0211604	PC1	4.05719	0	NA	NA	NA	NA	NA	NA	NA	NA	NA
I_2639752	I	2639752	0.146476	PC1	4.05719	0	NA	NA	NA	NA	NA	NA	NA	NA	NA
I_2643819	I	2643819	0.00994823	PC1	4.05719	0	NA	NA	NA	NA	NA	NA	NA	NA	NA
I_2644590	I	2644590	0.167037	PC1	4.05719	0	NA	NA	NA	NA	NA	NA	NA	NA	NA
I_2644807	I	2644807	0.35334	PC1	4.05719	0	NA	NA	NA	NA	NA	NA	NA	NA	NA
I_2650013	I	2650013	1.38136	PC1	4.05719	0	NA	NA	NA	NA	NA	NA	NA	NA	NA
I_2650123	I	2650123	0.251844	PC1	4.05719	0	NA	NA	NA	NA	NA	NA	NA	NA	NA
I_2652806	I	2652806	0.320615	PC1	4.05719	0	NA	NA	NA	NA	NA	NA	NA	NA	NA
I_2652807	I	2652807	0.10043	PC1	4.05719	0	NA	NA	NA	NA	NA	NA	NA	NA	NA
I_2652934	I	2652934	0.0371928	PC1	4.05719	0	NA	NA	NA	NA	NA	NA	NA	NA	NA
I_2655249	I	2655249	0.0481298	PC1	4.05719	0	NA	NA	NA	NA	NA	NA	NA	NA	NA
I_2659668	I	2659668	0.146476	PC1	4.05719	0	NA	NA	NA	NA	NA	NA	NA	NA	NA
I_2667630	I	2667630	0.0540271	PC1	4.05719	0	NA	NA	NA	NA	NA	NA	NA	NA	NA
I_2671939	I	2671939	0.227065	PC1	4.05719	0	NA	NA	NA	NA	NA	NA	NA	NA	NA
I_2673498	I	2673498	0.107115	PC1	4.05719	0	NA	NA	NA	NA	NA	NA	NA	NA	NA
I_2675051	I	2675051	0.10043	PC1	4.05719	0	NA	NA	NA	NA	NA	NA	NA	NA	NA
I_2677088	I	2677088	0.302626	PC1	4.05719	0	NA	NA	NA	NA	NA	NA	NA	NA	NA
I_2678210	I	2678210	0.28977	PC1	4.05719	0	NA	NA	NA	NA	NA	NA	NA	NA	NA
I_2679492	I	2679492	0.71789	PC1	4.05719	0	NA	NA	NA	NA	NA	NA	NA	NA	NA
I_2681097	I	2681097	0.693913	PC1	4.05719	0	NA	NA	NA	NA	NA	NA	NA	NA	NA
I_2681368	I	2681368	0.8023	PC1	4.05719	0	NA	NA	NA	NA	NA	NA	NA	NA	NA
I_2681803	I	2681803	0.266926	PC1	4.05719	0	NA	NA	NA	NA	NA	NA	NA	NA	NA
I_2683778	I	2683778	0.381161	PC1	4.05719	0	NA	NA	NA	NA	NA	NA	NA	NA	NA
I_2685709	I	2685709	0.408262	PC1	4.05719	0	NA	NA	NA	NA	NA	NA	NA	NA	NA
I_2686529	I	2686529	0.376367	PC1	4.05719	0	NA	NA	NA	NA	NA	NA	NA	NA	NA
I_2688866	I	2688866	0.0293038	PC1	4.05719	0	NA	NA	NA	NA	NA	NA	NA	NA	NA
I_2690596	I	2690596	0.502133	PC1	4.05719	0	NA	NA	NA	NA	NA	NA	NA	NA	NA
I_2691032	I	2691032	1.01467	PC1	4.05719	0	NA	NA	NA	NA	NA	NA	NA	NA	NA
I_2692904	I	2692904	0.484571	PC1	4.05719	0	NA	NA	NA	NA	NA	NA	NA	NA	NA
I_2693609	I	2693609	0.289524	PC1	4.05719	0	NA	NA	NA	NA	NA	NA	NA	NA	NA
I_2693910	I	2693910	0.180613	PC1	4.05719	0	NA	NA	NA	NA	NA	NA	NA	NA	NA
I_2694134	I	2694134	0.270017	PC1	4.05719	0	NA	NA	NA	NA	NA	NA	NA	NA	NA
I_2695908	I	2695908	0.343775	PC1	4.05719	0	NA	NA	NA	NA	NA	NA	NA	NA	NA
I_2698086	I	2698086	0.133485	PC1	4.05719	0	NA	NA	NA	NA	NA	NA	NA	NA	NA
I_2700443	I	2700443	0.16502	PC1	4.05719	0	NA	NA	NA	NA	NA	NA	NA	NA	NA
I_2702880	I	2702880	0.916994	PC1	4.05719	0	NA	NA	NA	NA	NA	NA	NA	NA	NA
I_2704709	I	2704709	0.0245006	PC1	4.05719	0	NA	NA	NA	NA	NA	NA	NA	NA	NA
I_2706869	I	2706869	0.293578	PC1	4.05719	0	NA	NA	NA	NA	NA	NA	NA	NA	NA
I_2707175	I	2707175	0.144353	PC1	4.05719	0	NA	NA	NA	NA	NA	NA	NA	NA	NA
I_2708044	I	2708044	0.578951	PC1	4.05719	0	NA	NA	NA	NA	NA	NA	NA	NA	NA
I_2708571	I	2708571	0.292064	PC1	4.05719	0	NA	NA	NA	NA	NA	NA	NA	NA	NA
I_2708720	I	2708720	0.474726	PC1	4.05719	0	NA	NA	NA	NA	NA	NA	NA	NA	NA
I_2709439	I	2709439	0.773069	PC1	4.05719	0	NA	NA	NA	NA	NA	NA	NA	NA	NA
I_2713786	I	2713786	0.343775	PC1	4.05719	0	NA	NA	NA	NA	NA	NA	NA	NA	NA
I_2715321	I	2715321	0.334385	PC1	4.05719	0	NA	NA	NA	NA	NA	NA	NA	NA	NA
I_2715340	I	2715340	0.28977	PC1	4.05719	0	NA	NA	NA	NA	NA	NA	NA	NA	NA
I_2716664	I	2716664	0.135314	PC1	4.05719	0	NA	NA	NA	NA	NA	NA	NA	NA	NA
I_2719649	I	2719649	0.733485	PC1	4.05719	0	NA	NA	NA	NA	NA	NA	NA	NA	NA
I_2722444	I	2722444	0.16502	PC1	4.05719	0	NA	NA	NA	NA	NA	NA	NA	NA	NA
I_2722901	I	2722901	0.466835	PC1	4.05719	0	NA	NA	NA	NA	NA	NA	NA	NA	NA
I_2723482	I	2723482	0.190747	PC1	4.05719	0	NA	NA	NA	NA	NA	NA	NA	NA	NA
I_2724334	I	2724334	0.0450804	PC1	4.05719	0	NA	NA	NA	NA	NA	NA	NA	NA	NA
I_2725259	I	2725259	0.729976	PC1	4.05719	0	NA	NA	NA	NA	NA	NA	NA	NA	NA
I_2725644	I	2725644	0.231705	PC1	4.05719	0	NA	NA	NA	NA	NA	NA	NA	NA	NA
I_2725969	I	2725969	0.179382	PC1	4.05719	0	NA	NA	NA	NA	NA	NA	NA	NA	NA
I_2728998	I	2728998	0.196679	PC1	4.05719	0	NA	NA	NA	NA	NA	NA	NA	NA	NA
I_2729074	I	2729074	0.0789822	PC1	4.05719	0	NA	NA	NA	NA	NA	NA	NA	NA	NA
I_2730263	I	2730263	0.0465981	PC1	4.05719	0	NA	NA	NA	NA	NA	NA	NA	NA	NA
I_2730317	I	2730317	1.2892	PC1	4.05719	0	NA	NA	NA	NA	NA	NA	NA	NA	NA
I_2731652	I	2731652	0.578015	PC1	4.05719	0	NA	NA	NA	NA	NA	NA	NA	NA	NA
I_2733130	I	2733130	0.149979	PC1	4.05719	0	NA	NA	NA	NA	NA	NA	NA	NA	NA
I_2734982	I	2734982	0.694237	PC1	4.05719	0	NA	NA	NA	NA	NA	NA	NA	NA	NA
I_2735552	I	2735552	0.72267	PC1	4.05719	0	NA	NA	NA	NA	NA	NA	NA	NA	NA
I_2735588	I	2735588	0.858464	PC1	4.05719	0	NA	NA	NA	NA	NA	NA	NA	NA	NA
I_2735653	I	2735653	0.267447	PC1	4.05719	0	NA	NA	NA	NA	NA	NA	NA	NA	NA
I_2735870	I	2735870	0.667211	PC1	4.05719	0	NA	NA	NA	NA	NA	NA	NA	NA	NA
I_2741267	I	2741267	0.329878	PC1	4.05719	0	NA	NA	NA	NA	NA	NA	NA	NA	NA
I_2741877	I	2741877	0.394291	PC1	4.05719	0	NA	NA	NA	NA	NA	NA	NA	NA	NA
I_2744758	I	2744758	0.0459207	PC1	4.05719	0	NA	NA	NA	NA	NA	NA	NA	NA	NA
I_2745367	I	2745367	0.0356045	PC1	4.05719	0	NA	NA	NA	NA	NA	NA	NA	NA	NA
I_2747057	I	2747057	0.212618	PC1	4.05719	0	NA	NA	NA	NA	NA	NA	NA	NA	NA
I_2747158	I	2747158	0.138993	PC1	4.05719	0	NA	NA	NA	NA	NA	NA	NA	NA	NA
I_2747389	I	2747389	0.28977	PC1	4.05719	0	NA	NA	NA	NA	NA	NA	NA	NA	NA
I_2747946	I	2747946	0.474726	PC1	4.05719	0	NA	NA	NA	NA	NA	NA	NA	NA	NA
I_2747950	I	2747950	0.270017	PC1	4.05719	0	NA	NA	NA	NA	NA	NA	NA	NA	NA
I_2748569	I	2748569	0.343172	PC1	4.05719	0	NA	NA	NA	NA	NA	NA	NA	NA	NA
I_2751052	I	2751052	0.644249	PC1	4.05719	0	NA	NA	NA	NA	NA	NA	NA	NA	NA
I_2751110	I	2751110	0.725575	PC1	4.05719	0	NA	NA	NA	NA	NA	NA	NA	NA	NA
I_2751642	I	2751642	0.0356045	PC1	4.05719	0	NA	NA	NA	NA	NA	NA	NA	NA	NA
I_2752137	I	2752137	0.165637	PC1	4.05719	0	NA	NA	NA	NA	NA	NA	NA	NA	NA
I_2752557	I	2752557	0.104083	PC1	4.05719	0	NA	NA	NA	NA	NA	NA	NA	NA	NA
I_2752673	I	2752673	0.622462	PC1	4.05719	0	NA	NA	NA	NA	NA	NA	NA	NA	NA
I_2753144	I	2753144	0.996323	PC1	4.05719	0	NA	NA	NA	NA	NA	NA	NA	NA	NA
I_2753837	I	2753837	0.163871	PC1	4.05719	0	NA	NA	NA	NA	NA	NA	NA	NA	NA
I_2754010	I	2754010	0.367467	PC1	4.05719	0	NA	NA	NA	NA	NA	NA	NA	NA	NA
I_2756179	I	2756179	0.255141	PC1	4.05719	0	NA	NA	NA	NA	NA	NA	NA	NA	NA
I_2757564	I	2757564	0.163871	PC1	4.05719	0	NA	NA	NA	NA	NA	NA	NA	NA	NA
I_2758220	I	2758220	0.602098	PC1	4.05719	0	NA	NA	NA	NA	NA	NA	NA	NA	NA
I_2758746	I	2758746	0.151004	PC1	4.05719	0	NA	NA	NA	NA	NA	NA	NA	NA	NA
I_2761065	I	2761065	0.386004	PC1	4.05719	0	NA	NA	NA	NA	NA	NA	NA	NA	NA
I_2763438	I	2763438	0.608298	PC1	4.05719	0	NA	NA	NA	NA	NA	NA	NA	NA	NA
I_2763701	I	2763701	0.289859	PC1	4.05719	0	NA	NA	NA	NA	NA	NA	NA	NA	NA
I_2764083	I	2764083	0.446289	PC1	4.05719	0	NA	NA	NA	NA	NA	NA	NA	NA	NA
I_2765220	I	2765220	0.716592	PC1	4.05719	0	NA	NA	NA	NA	NA	NA	NA	NA	NA
I_2767728	I	2767728	0.25421	PC1	4.05719	0	NA	NA	NA	NA	NA	NA	NA	NA	NA
I_2769417	I	2769417	0.258502	PC1	4.05719	0	NA	NA	NA	NA	NA	NA	NA	NA	NA
I_2769653	I	2769653	0.129181	PC1	4.05719	0	NA	NA	NA	NA	NA	NA	NA	NA	NA
I_2771257	I	2771257	0.504069	PC1	4.05719	0	NA	NA	NA	NA	NA	NA	NA	NA	NA
I_2772888	I	2772888	0.243288	PC1	4.05719	0	NA	NA	NA	NA	NA	NA	NA	NA	NA
I_2773126	I	2773126	0.00365754	PC1	4.05719	0	NA	NA	NA	NA	NA	NA	NA	NA	NA
I_2773797	I	2773797	0.130221	PC1	4.05719	0	NA	NA	NA	NA	NA	NA	NA	NA	NA
I_2775225	I	2775225	0.600431	PC1	4.05719	0	NA	NA	NA	NA	NA	NA	NA	NA	NA
I_2775396	I	2775396	0.218738	PC1	4.05719	0	NA	NA	NA	NA	NA	NA	NA	NA	NA
I_2776274	I	2776274	1.03242	PC1	4.05719	0	NA	NA	NA	NA	NA	NA	NA	NA	NA
I_2776934	I	2776934	0.0294478	PC1	4.05719	0	NA	NA	NA	NA	NA	NA	NA	NA	NA
I_2776940	I	2776940	0.11426	PC1	4.05719	0	NA	NA	NA	NA	NA	NA	NA	NA	NA
I_2777129	I	2777129	1.00741	PC1	4.05719	0	NA	NA	NA	NA	NA	NA	NA	NA	NA
I_2777504	I	2777504	0.682838	PC1	4.05719	0	NA	NA	NA	NA	NA	NA	NA	NA	NA
I_2777596	I	2777596	0.218236	PC1	4.05719	0	NA	NA	NA	NA	NA	NA	NA	NA	NA
I_2778113	I	2778113	0.582538	PC1	4.05719	0	NA	NA	NA	NA	NA	NA	NA	NA	NA
I_2783834	I	2783834	0.709725	PC1	4.05719	0	NA	NA	NA	NA	NA	NA	NA	NA	NA
I_2785419	I	2785419	0.0699086	PC1	4.05719	0	NA	NA	NA	NA	NA	NA	NA	NA	NA
I_2786569	I	2786569	0.0191375	PC1	4.05719	0	NA	NA	NA	NA	NA	NA	NA	NA	NA
I_2789743	I	2789743	0.0811156	PC1	4.05719	0	NA	NA	NA	NA	NA	NA	NA	NA	NA
I_2795012	I	2795012	0.854299	PC1	4.05719	0	NA	NA	NA	NA	NA	NA	NA	NA	NA
I_2798999	I	2798999	0.0900603	PC1	4.05719	0	NA	NA	NA	NA	NA	NA	NA	NA	NA
I_2802046	I	2802046	0.0696701	PC1	4.05719	0	NA	NA	NA	NA	NA	NA	NA	NA	NA
I_2804940	I	2804940	0.388638	PC1	4.05719	0	NA	NA	NA	NA	NA	NA	NA	NA	NA
I_2806051	I	2806051	0.306637	PC1	4.05719	0	NA	NA	NA	NA	NA	NA	NA	NA	NA
I_2818332	I	2818332	0.0202075	PC1	4.05719	0	NA	NA	NA	NA	NA	NA	NA	NA	NA
I_2820691	I	2820691	0.0366611	PC1	4.05719	0	NA	NA	NA	NA	NA	NA	NA	NA	NA
I_2821835	I	2821835	0.605499	PC1	4.05719	0	NA	NA	NA	NA	NA	NA	NA	NA	NA
I_2823448	I	2823448	0.667561	PC1	4.05719	0	NA	NA	NA	NA	NA	NA	NA	NA	NA
I_2824804	I	2824804	0.436953	PC1	4.05719	0	NA	NA	NA	NA	NA	NA	NA	NA	NA
I_2825145	I	2825145	0.0820932	PC1	4.05719	0	NA	NA	NA	NA	NA	NA	NA	NA	NA
I_2826618	I	2826618	0.420943	PC1	4.05719	0	NA	NA	NA	NA	NA	NA	NA	NA	NA
I_2828218	I	2828218	0.700518	PC1	4.05719	0	NA	NA	NA	NA	NA	NA	NA	NA	NA
I_2833571	I	2833571	0.14951	PC1	4.05719	0	NA	NA	NA	NA	NA	NA	NA	NA	NA
I_2834520	I	2834520	0.280007	PC1	4.05719	0	NA	NA	NA	NA	NA	NA	NA	NA	NA
I_2835348	I	2835348	0.0191499	PC1	4.05719	0	NA	NA	NA	NA	NA	NA	NA	NA	NA
I_2835977	I	2835977	0.474726	PC1	4.05719	0	NA	NA	NA	NA	NA	NA	NA	NA	NA
I_2838134	I	2838134	0.346873	PC1	4.05719	0	NA	NA	NA	NA	NA	NA	NA	NA	NA
I_2838437	I	2838437	0.0886258	PC1	4.05719	0	NA	NA	NA	NA	NA	NA	NA	NA	NA
I_2839088	I	2839088	0.16525	PC1	4.05719	0	NA	NA	NA	NA	NA	NA	NA	NA	NA
I_2839375	I	2839375	0.667561	PC1	4.05719	0	NA	NA	NA	NA	NA	NA	NA	NA	NA
I_2842684	I	2842684	0.0112363	PC1	4.05719	0	NA	NA	NA	NA	NA	NA	NA	NA	NA
I_2847512	I	2847512	0.276291	PC1	4.05719	0	NA	NA	NA	NA	NA	NA	NA	NA	NA
I_2847563	I	2847563	0.25512	PC1	4.05719	0	NA	NA	NA	NA	NA	NA	NA	NA	NA
I_2850734	I	2850734	0.0983554	PC1	4.05719	0	NA	NA	NA	NA	NA	NA	NA	NA	NA
I_2852511	I	2852511	0.584517	PC1	4.05719	0	NA	NA	NA	NA	NA	NA	NA	NA	NA
I_2864308	I	2864308	0.110114	PC1	4.05719	0	NA	NA	NA	NA	NA	NA	NA	NA	NA
I_2877377	I	2877377	0.011526	PC1	4.05719	0	NA	NA	NA	NA	NA	NA	NA	NA	NA
I_2878983	I	2878983	0.0353934	PC1	4.05719	0	NA	NA	NA	NA	NA	NA	NA	NA	NA
I_2879170	I	2879170	0.213168	PC1	4.05719	0	NA	NA	NA	NA	NA	NA	NA	NA	NA
I_2880459	I	2880459	0.554778	PC1	4.05719	0	NA	NA	NA	NA	NA	NA	NA	NA	NA
I_2888630	I	2888630	0.0484357	PC1	4.05719	0	NA	NA	NA	NA	NA	NA	NA	NA	NA
I_2889203	I	2889203	0.474726	PC1	4.05719	0	NA	NA	NA	NA	NA	NA	NA	NA	NA
I_2895884	I	2895884	0.0608336	PC1	4.05719	0	NA	NA	NA	NA	NA	NA	NA	NA	NA
I_2895898	I	2895898	0.768705	PC1	4.05719	0	NA	NA	NA	NA	NA	NA	NA	NA	NA
I_2897768	I	2897768	0.624789	PC1	4.05719	0	NA	NA	NA	NA	NA	NA	NA	NA	NA
I_2899256	I	2899256	0.230725	PC1	4.05719	0	NA	NA	NA	NA	NA	NA	NA	NA	NA
I_2903989	I	2903989	0.327846	PC1	4.05719	0	NA	NA	NA	NA	NA	NA	NA	NA	NA
I_2906037	I	2906037	0.359109	PC1	4.05719	0	NA	NA	NA	NA	NA	NA	NA	NA	NA
I_2906957	I	2906957	0.296046	PC1	4.05719	0	NA	NA	NA	NA	NA	NA	NA	NA	NA
I_2915506	I	2915506	2.48687	PC1	4.05719	0	NA	NA	NA	NA	NA	NA	NA	NA	NA
I_2920771	I	2920771	0.474726	PC1	4.05719	0	NA	NA	NA	NA	NA	NA	NA	NA	NA
I_2921239	I	2921239	0.0251685	PC1	4.05719	0	NA	NA	NA	NA	NA	NA	NA	NA	NA
I_2923206	I	2923206	0.410934	PC1	4.05719	0	NA	NA	NA	NA	NA	NA	NA	NA	NA
I_2923426	I	2923426	0.741012	PC1	4.05719	0	NA	NA	NA	NA	NA	NA	NA	NA	NA
I_2926151	I	2926151	0.400353	PC1	4.05719	0	NA	NA	NA	NA	NA	NA	NA	NA	NA
I_2930431	I	2930431	0.168077	PC1	4.05719	0	NA	NA	NA	NA	NA	NA	NA	NA	NA
I_2930976	I	2930976	0.0410688	PC1	4.05719	0	NA	NA	NA	NA	NA	NA	NA	NA	NA
I_2931053	I	2931053	0.584808	PC1	4.05719	0	NA	NA	NA	NA	NA	NA	NA	NA	NA
I_2933149	I	2933149	0.597291	PC1	4.05719	0	NA	NA	NA	NA	NA	NA	NA	NA	NA
I_2940116	I	2940116	0.0771958	PC1	4.05719	0	NA	NA	NA	NA	NA	NA	NA	NA	NA
I_2940601	I	2940601	0.0405649	PC1	4.05719	0	NA	NA	NA	NA	NA	NA	NA	NA	NA
I_2940742	I	2940742	0.0489712	PC1	4.05719	0	NA	NA	NA	NA	NA	NA	NA	NA	NA
I_2941789	I	2941789	0.417695	PC1	4.05719	0	NA	NA	NA	NA	NA	NA	NA	NA	NA
I_2942491	I	2942491	0.230932	PC1	4.05719	0	NA	NA	NA	NA	NA	NA	NA	NA	NA
I_2942901	I	2942901	0.0753472	PC1	4.05719	0	NA	NA	NA	NA	NA	NA	NA	NA	NA
I_2944266	I	2944266	0.228225	PC1	4.05719	0	NA	NA	NA	NA	NA	NA	NA	NA	NA
I_2945643	I	2945643	0.0909987	PC1	4.05719	0	NA	NA	NA	NA	NA	NA	NA	NA	NA
I_2947304	I	2947304	0.0531664	PC1	4.05719	0	NA	NA	NA	NA	NA	NA	NA	NA	NA
I_2947305	I	2947305	0.087848	PC1	4.05719	0	NA	NA	NA	NA	NA	NA	NA	NA	NA
I_2947376	I	2947376	0.0123	PC1	4.05719	0	NA	NA	NA	NA	NA	NA	NA	NA	NA
I_2948007	I	2948007	0.130831	PC1	4.05719	0	NA	NA	NA	NA	NA	NA	NA	NA	NA
I_2949987	I	2949987	0.0105257	PC1	4.05719	0	NA	NA	NA	NA	NA	NA	NA	NA	NA
I_2950237	I	2950237	0.238222	PC1	4.05719	0	NA	NA	NA	NA	NA	NA	NA	NA	NA
I_2950547	I	2950547	0.458807	PC1	4.05719	0	NA	NA	NA	NA	NA	NA	NA	NA	NA
I_2950767	I	2950767	0.254594	PC1	4.05719	0	NA	NA	NA	NA	NA	NA	NA	NA	NA
I_2951462	I	2951462	0.169147	PC1	4.05719	0	NA	NA	NA	NA	NA	NA	NA	NA	NA
I_2953051	I	2953051	0.0450934	PC1	4.05719	0	NA	NA	NA	NA	NA	NA	NA	NA	NA
I_2954186	I	2954186	0.38497	PC1	4.05719	0	NA	NA	NA	NA	NA	NA	NA	NA	NA
I_2956461	I	2956461	0.154179	PC1	4.05719	0	NA	NA	NA	NA	NA	NA	NA	NA	NA
I_2958982	I	2958982	0.0167718	PC1	4.05719	0	NA	NA	NA	NA	NA	NA	NA	NA	NA
I_2960082	I	2960082	0.0943573	PC1	4.05719	0	NA	NA	NA	NA	NA	NA	NA	NA	NA
I_2960974	I	2960974	0.0270651	PC1	4.05719	0	NA	NA	NA	NA	NA	NA	NA	NA	NA
I_2963845	I	2963845	0.0369973	PC1	4.05719	0	NA	NA	NA	NA	NA	NA	NA	NA	NA
I_2966165	I	2966165	0.00878131	PC1	4.05719	0	NA	NA	NA	NA	NA	NA	NA	NA	NA
I_2973046	I	2973046	0.345327	PC1	4.05719	0	NA	NA	NA	NA	NA	NA	NA	NA	NA
I_2975775	I	2975775	0.560091	PC1	4.05719	0	NA	NA	NA	NA	NA	NA	NA	NA	NA
I_2984622	I	2984622	0.293937	PC1	4.05719	0	NA	NA	NA	NA	NA	NA	NA	NA	NA
I_2990137	I	2990137	0.118222	PC1	4.05719	0	NA	NA	NA	NA	NA	NA	NA	NA	NA
I_2991018	I	2991018	0.0302461	PC1	4.05719	0	NA	NA	NA	NA	NA	NA	NA	NA	NA
I_2994073	I	2994073	0.270983	PC1	4.05719	0	NA	NA	NA	NA	NA	NA	NA	NA	NA
I_2994273	I	2994273	0.0433173	PC1	4.05719	0	NA	NA	NA	NA	NA	NA	NA	NA	NA
I_2996463	I	2996463	0.0855609	PC1	4.05719	0	NA	NA	NA	NA	NA	NA	NA	NA	NA
I_2999342	I	2999342	0.0416151	PC1	4.05719	0	NA	NA	NA	NA	NA	NA	NA	NA	NA
I_3001139	I	3001139	0.00878131	PC1	4.05719	0	NA	NA	NA	NA	NA	NA	NA	NA	NA
I_3001144	I	3001144	0.0680459	PC1	4.05719	0	NA	NA	NA	NA	NA	NA	NA	NA	NA
I_3001330	I	3001330	0.235885	PC1	4.05719	0	NA	NA	NA	NA	NA	NA	NA	NA	NA
I_3002453	I	3002453	0.18306	PC1	4.05719	0	NA	NA	NA	NA	NA	NA	NA	NA	NA
I_3005983	I	3005983	0.267363	PC1	4.05719	0	NA	NA	NA	NA	NA	NA	NA	NA	NA
I_3007540	I	3007540	0.63756	PC1	4.05719	0	NA	NA	NA	NA	NA	NA	NA	NA	NA
I_3008127	I	3008127	0.535168	PC1	4.05719	0	NA	NA	NA	NA	NA	NA	NA	NA	NA
I_3010546	I	3010546	0.0679514	PC1	4.05719	0	NA	NA	NA	NA	NA	NA	NA	NA	NA
I_3012703	I	3012703	0.161037	PC1	4.05719	0	NA	NA	NA	NA	NA	NA	NA	NA	NA
I_3016051	I	3016051	0.330887	PC1	4.05719	0	NA	NA	NA	NA	NA	NA	NA	NA	NA
I_3017236	I	3017236	0.0683334	PC1	4.05719	0	NA	NA	NA	NA	NA	NA	NA	NA	NA
I_3021298	I	3021298	0.11613	PC1	4.05719	0	NA	NA	NA	NA	NA	NA	NA	NA	NA
I_3023301	I	3023301	0.525729	PC1	4.05719	0	NA	NA	NA	NA	NA	NA	NA	NA	NA
I_3024927	I	3024927	0.290472	PC1	4.05719	0	NA	NA	NA	NA	NA	NA	NA	NA	NA
I_3028204	I	3028204	0.363603	PC1	4.05719	0	NA	NA	NA	NA	NA	NA	NA	NA	NA
I_3028305	I	3028305	0.067738	PC1	4.05719	0	NA	NA	NA	NA	NA	NA	NA	NA	NA
I_3029222	I	3029222	0.514061	PC1	4.05719	0	NA	NA	NA	NA	NA	NA	NA	NA	NA
I_3029502	I	3029502	0.826313	PC1	4.05719	0	NA	NA	NA	NA	NA	NA	NA	NA	NA
I_3031319	I	3031319	0.312589	PC1	4.05719	0	NA	NA	NA	NA	NA	NA	NA	NA	NA
I_3031401	I	3031401	0.828971	PC1	4.05719	0	NA	NA	NA	NA	NA	NA	NA	NA	NA
I_3031428	I	3031428	0.03962	PC1	4.05719	0	NA	NA	NA	NA	NA	NA	NA	NA	NA
I_3035873	I	3035873	0.35295	PC1	4.05719	0	NA	NA	NA	NA	NA	NA	NA	NA	NA
I_3037936	I	3037936	0.0855609	PC1	4.05719	0	NA	NA	NA	NA	NA	NA	NA	NA	NA
I_3038096	I	3038096	0.739977	PC1	4.05719	0	NA	NA	NA	NA	NA	NA	NA	NA	NA
I_3039157	I	3039157	0.336245	PC1	4.05719	0	NA	NA	NA	NA	NA	NA	NA	NA	NA
I_3042553	I	3042553	0.138659	PC1	4.05719	0	NA	NA	NA	NA	NA	NA	NA	NA	NA
I_3042556	I	3042556	0.187116	PC1	4.05719	0	NA	NA	NA	NA	NA	NA	NA	NA	NA
I_3050079	I	3050079	0.0890628	PC1	4.05719	0	NA	NA	NA	NA	NA	NA	NA	NA	NA
I_3051257	I	3051257	0.181342	PC1	4.05719	0	NA	NA	NA	NA	NA	NA	NA	NA	NA
I_3051565	I	3051565	0.013343	PC1	4.05719	0	NA	NA	NA	NA	NA	NA	NA	NA	NA
I_3051582	I	3051582	0.288464	PC1	4.05719	0	NA	NA	NA	NA	NA	NA	NA	NA	NA
I_3054046	I	3054046	0.324555	PC1	4.05719	0	NA	NA	NA	NA	NA	NA	NA	NA	NA
I_3055353	I	3055353	0.0559832	PC1	4.05719	0	NA	NA	NA	NA	NA	NA	NA	NA	NA
I_3058678	I	3058678	0.0380063	PC1	4.05719	0	NA	NA	NA	NA	NA	NA	NA	NA	NA
I_3059060	I	3059060	0.933906	PC1	4.05719	0	NA	NA	NA	NA	NA	NA	NA	NA	NA
I_3060434	I	3060434	0.495405	PC1	4.05719	0	NA	NA	NA	NA	NA	NA	NA	NA	NA
I_3066704	I	3066704	0.233702	PC1	4.05719	0	NA	NA	NA	NA	NA	NA	NA	NA	NA
I_3073674	I	3073674	0.203006	PC1	4.05719	0	NA	NA	NA	NA	NA	NA	NA	NA	NA
I_3073698	I	3073698	0.63355	PC1	4.05719	0	NA	NA	NA	NA	NA	NA	NA	NA	NA
I_3073756	I	3073756	0.515226	PC1	4.05719	0	NA	NA	NA	NA	NA	NA	NA	NA	NA
I_3076864	I	3076864	0.373333	PC1	4.05719	0	NA	NA	NA	NA	NA	NA	NA	NA	NA
I_3077294	I	3077294	0.753488	PC1	4.05719	0	NA	NA	NA	NA	NA	NA	NA	NA	NA
I_3077537	I	3077537	0.013271	PC1	4.05719	0	NA	NA	NA	NA	NA	NA	NA	NA	NA
I_3078537	I	3078537	0.129665	PC1	4.05719	0	NA	NA	NA	NA	NA	NA	NA	NA	NA
I_3078696	I	3078696	0.288573	PC1	4.05719	0	NA	NA	NA	NA	NA	NA	NA	NA	NA
I_3079031	I	3079031	0.00302218	PC1	4.05719	0	NA	NA	NA	NA	NA	NA	NA	NA	NA
I_3079695	I	3079695	0.57968	PC1	4.05719	0	NA	NA	NA	NA	NA	NA	NA	NA	NA
I_3079880	I	3079880	0.873216	PC1	4.05719	0	NA	NA	NA	NA	NA	NA	NA	NA	NA
I_3080051	I	3080051	1.09867	PC1	4.05719	0	NA	NA	NA	NA	NA	NA	NA	NA	NA
I_3080241	I	3080241	1.25033	PC1	4.05719	0	NA	NA	NA	NA	NA	NA	NA	NA	NA
I_3080890	I	3080890	0.314852	PC1	4.05719	0	NA	NA	NA	NA	NA	NA	NA	NA	NA
I_3081052	I	3081052	0.404438	PC1	4.05719	0	NA	NA	NA	NA	NA	NA	NA	NA	NA
I_3085725	I	3085725	0.0551411	PC1	4.05719	0	NA	NA	NA	NA	NA	NA	NA	NA	NA
I_3085742	I	3085742	0.706546	PC1	4.05719	0	NA	NA	NA	NA	NA	NA	NA	NA	NA
I_3086935	I	3086935	0.224051	PC1	4.05719	0	NA	NA	NA	NA	NA	NA	NA	NA	NA
I_3087289	I	3087289	0.00334173	PC1	4.05719	0	NA	NA	NA	NA	NA	NA	NA	NA	NA
I_3092123	I	3092123	0.0209323	PC1	4.05719	0	NA	NA	NA	NA	NA	NA	NA	NA	NA
I_3095061	I	3095061	0.229084	PC1	4.05719	0	NA	NA	NA	NA	NA	NA	NA	NA	NA
I_3105707	I	3105707	0.633193	PC1	4.05719	0	NA	NA	NA	NA	NA	NA	NA	NA	NA
I_3107585	I	3107585	0.0856493	PC1	4.05719	0	NA	NA	NA	NA	NA	NA	NA	NA	NA
I_3108247	I	3108247	0.333954	PC1	4.05719	0	NA	NA	NA	NA	NA	NA	NA	NA	NA
I_3109660	I	3109660	0.22601	PC1	4.05719	0	NA	NA	NA	NA	NA	NA	NA	NA	NA
I_3110074	I	3110074	0.851726	PC1	4.05719	0	NA	NA	NA	NA	NA	NA	NA	NA	NA
I_3110638	I	3110638	0.111715	PC1	4.05719	0	NA	NA	NA	NA	NA	NA	NA	NA	NA
I_3114254	I	3114254	0.520806	PC1	4.05719	0	NA	NA	NA	NA	NA	NA	NA	NA	NA
I_3116679	I	3116679	0.972051	PC1	4.05719	0	NA	NA	NA	NA	NA	NA	NA	NA	NA
I_3116829	I	3116829	0.635098	PC1	4.05719	0	NA	NA	NA	NA	NA	NA	NA	NA	NA
I_3126275	I	3126275	0.371753	PC1	4.05719	0	NA	NA	NA	NA	NA	NA	NA	NA	NA
I_3133323	I	3133323	0.229361	PC1	4.05719	0	NA	NA	NA	NA	NA	NA	NA	NA	NA
I_3136475	I	3136475	0.15734	PC1	4.05719	0	NA	NA	NA	NA	NA	NA	NA	NA	NA
I_3137307	I	3137307	0.0564062	PC1	4.05719	0	NA	NA	NA	NA	NA	NA	NA	NA	NA
I_3137820	I	3137820	0.0804355	PC1	4.05719	0	NA	NA	NA	NA	NA	NA	NA	NA	NA
I_3139978	I	3139978	0.307104	PC1	4.05719	0	NA	NA	NA	NA	NA	NA	NA	NA	NA
I_3141089	I	3141089	1.0766	PC1	4.05719	0	NA	NA	NA	NA	NA	NA	NA	NA	NA
I_3149768	I	3149768	0.00242393	PC1	4.05719	0	NA	NA	NA	NA	NA	NA	NA	NA	NA
I_3150370	I	3150370	0.185304	PC1	4.05719	0	NA	NA	NA	NA	NA	NA	NA	NA	NA
I_3150563	I	3150563	0.663667	PC1	4.05719	0	NA	NA	NA	NA	NA	NA	NA	NA	NA
I_3151681	I	3151681	0.0629661	PC1	4.05719	0	NA	NA	NA	NA	NA	NA	NA	NA	NA
I_3156149	I	3156149	0.122992	PC1	4.05719	0	NA	NA	NA	NA	NA	NA	NA	NA	NA
I_3157787	I	3157787	0.538809	PC1	4.05719	0	NA	NA	NA	NA	NA	NA	NA	NA	NA
I_3158376	I	3158376	0.244536	PC1	4.05719	0	NA	NA	NA	NA	NA	NA	NA	NA	NA
I_3159016	I	3159016	0.273709	PC1	4.05719	0	NA	NA	NA	NA	NA	NA	NA	NA	NA
I_3160955	I	3160955	0.493327	PC1	4.05719	0	NA	NA	NA	NA	NA	NA	NA	NA	NA
I_3161614	I	3161614	0.0466372	PC1	4.05719	0	NA	NA	NA	NA	NA	NA	NA	NA	NA
I_3164951	I	3164951	0.339866	PC1	4.05719	0	NA	NA	NA	NA	NA	NA	NA	NA	NA
I_3169346	I	3169346	0.33039	PC1	4.05719	0	NA	NA	NA	NA	NA	NA	NA	NA	NA
I_3173070	I	3173070	0.516021	PC1	4.05719	0	NA	NA	NA	NA	NA	NA	NA	NA	NA
I_3173877	I	3173877	0.885322	PC1	4.05719	0	NA	NA	NA	NA	NA	NA	NA	NA	NA
I_3174078	I	3174078	0.0113518	PC1	4.05719	0	NA	NA	NA	NA	NA	NA	NA	NA	NA
I_3175794	I	3175794	1.19936	PC1	4.05719	0	NA	NA	NA	NA	NA	NA	NA	NA	NA
I_3176074	I	3176074	1.14988	PC1	4.05719	0	NA	NA	NA	NA	NA	NA	NA	NA	NA
I_3178251	I	3178251	1.20786	PC1	4.05719	0	NA	NA	NA	NA	NA	NA	NA	NA	NA
I_3179739	I	3179739	0.165743	PC1	4.05719	0	NA	NA	NA	NA	NA	NA	NA	NA	NA
I_3182040	I	3182040	0.308413	PC1	4.05719	0	NA	NA	NA	NA	NA	NA	NA	NA	NA
I_3182331	I	3182331	0.885879	PC1	4.05719	0	NA	NA	NA	NA	NA	NA	NA	NA	NA
I_3183631	I	3183631	0.414488	PC1	4.05719	0	NA	NA	NA	NA	NA	NA	NA	NA	NA
I_3183651	I	3183651	1.05739	PC1	4.05719	0	NA	NA	NA	NA	NA	NA	NA	NA	NA
I_3186622	I	3186622	0.305482	PC1	4.05719	0	NA	NA	NA	NA	NA	NA	NA	NA	NA
I_3188224	I	3188224	0.808846	PC1	4.05719	0	NA	NA	NA	NA	NA	NA	NA	NA	NA
I_3190352	I	3190352	1.12805	PC1	4.05719	0	NA	NA	NA	NA	NA	NA	NA	NA	NA
I_3193751	I	3193751	0.599775	PC1	4.05719	0	NA	NA	NA	NA	NA	NA	NA	NA	NA
I_3201918	I	3201918	0.969487	PC1	4.05719	0	NA	NA	NA	NA	NA	NA	NA	NA	NA
I_3203116	I	3203116	0.30997	PC1	4.05719	0	NA	NA	NA	NA	NA	NA	NA	NA	NA
I_3205221	I	3205221	0.379541	PC1	4.05719	0	NA	NA	NA	NA	NA	NA	NA	NA	NA
I_3207055	I	3207055	0.334647	PC1	4.05719	0	NA	NA	NA	NA	NA	NA	NA	NA	NA
I_3217227	I	3217227	0.670856	PC1	4.05719	0	NA	NA	NA	NA	NA	NA	NA	NA	NA
I_3218107	I	3218107	1.18199	PC1	4.05719	0	NA	NA	NA	NA	NA	NA	NA	NA	NA
I_3221177	I	3221177	0.0776183	PC1	4.05719	0	NA	NA	NA	NA	NA	NA	NA	NA	NA
I_3221540	I	3221540	1.10212	PC1	4.05719	0	NA	NA	NA	NA	NA	NA	NA	NA	NA
I_3221739	I	3221739	1.45637	PC1	4.05719	0	NA	NA	NA	NA	NA	NA	NA	NA	NA
I_3221811	I	3221811	0.466025	PC1	4.05719	0	NA	NA	NA	NA	NA	NA	NA	NA	NA
I_3247619	I	3247619	0.187027	PC1	4.05719	0	NA	NA	NA	NA	NA	NA	NA	NA	NA
I_3247687	I	3247687	0.290652	PC1	4.05719	0	NA	NA	NA	NA	NA	NA	NA	NA	NA
I_3247821	I	3247821	0.34858	PC1	4.05719	0	NA	NA	NA	NA	NA	NA	NA	NA	NA
I_3248100	I	3248100	0.450364	PC1	4.05719	0	NA	NA	NA	NA	NA	NA	NA	NA	NA
I_3251320	I	3251320	1.07939	PC1	4.05719	0	NA	NA	NA	NA	NA	NA	NA	NA	NA
I_3252324	I	3252324	0.474726	PC1	4.05719	0	NA	NA	NA	NA	NA	NA	NA	NA	NA
I_3255313	I	3255313	0.223577	PC1	4.05719	0	NA	NA	NA	NA	NA	NA	NA	NA	NA
I_3257894	I	3257894	1.20172	PC1	4.05719	0	NA	NA	NA	NA	NA	NA	NA	NA	NA
I_3261566	I	3261566	0.290731	PC1	4.05719	0	NA	NA	NA	NA	NA	NA	NA	NA	NA
I_3264891	I	3264891	0.629881	PC1	4.05719	0	NA	NA	NA	NA	NA	NA	NA	NA	NA
I_3269991	I	3269991	0.248874	PC1	4.05719	0	NA	NA	NA	NA	NA	NA	NA	NA	NA
I_3279213	I	3279213	0.107288	PC1	4.05719	0	NA	NA	NA	NA	NA	NA	NA	NA	NA
I_3281069	I	3281069	0.0590406	PC1	4.05719	0	NA	NA	NA	NA	NA	NA	NA	NA	NA
I_3281882	I	3281882	0.687711	PC1	4.05719	0	NA	NA	NA	NA	NA	NA	NA	NA	NA
I_3284187	I	3284187	0.0869875	PC1	4.05719	0	NA	NA	NA	NA	NA	NA	NA	NA	NA
I_3286937	I	3286937	0.0959454	PC1	4.05719	0	NA	NA	NA	NA	NA	NA	NA	NA	NA
I_3290554	I	3290554	0.163248	PC1	4.05719	0	NA	NA	NA	NA	NA	NA	NA	NA	NA
I_3294351	I	3294351	0.176213	PC1	4.05719	0	NA	NA	NA	NA	NA	NA	NA	NA	NA
I_3294475	I	3294475	0.284309	PC1	4.05719	0	NA	NA	NA	NA	NA	NA	NA	NA	NA
I_3297353	I	3297353	1.04416	PC1	4.05719	0	NA	NA	NA	NA	NA	NA	NA	NA	NA
I_3299295	I	3299295	0.474726	PC1	4.05719	0	NA	NA	NA	NA	NA	NA	NA	NA	NA
I_3299323	I	3299323	0.683474	PC1	4.05719	0	NA	NA	NA	NA	NA	NA	NA	NA	NA
I_3309647	I	3309647	2.04531	PC1	4.05719	0	NA	NA	NA	NA	NA	NA	NA	NA	NA
I_3313010	I	3313010	0.101395	PC1	4.05719	0	NA	NA	NA	NA	NA	NA	NA	NA	NA
I_3313490	I	3313490	0.105514	PC1	4.05719	0	NA	NA	NA	NA	NA	NA	NA	NA	NA
I_3314476	I	3314476	1.09594	PC1	4.05719	0	NA	NA	NA	NA	NA	NA	NA	NA	NA
I_3314589	I	3314589	0.176213	PC1	4.05719	0	NA	NA	NA	NA	NA	NA	NA	NA	NA
I_3319130	I	3319130	0.00247314	PC1	4.05719	0	NA	NA	NA	NA	NA	NA	NA	NA	NA
I_3331043	I	3331043	0.0447812	PC1	4.05719	0	NA	NA	NA	NA	NA	NA	NA	NA	NA
I_3331358	I	3331358	0.372948	PC1	4.05719	0	NA	NA	NA	NA	NA	NA	NA	NA	NA
I_3332898	I	3332898	0.96063	PC1	4.05719	0	NA	NA	NA	NA	NA	NA	NA	NA	NA
I_3333530	I	3333530	0.150509	PC1	4.05719	0	NA	NA	NA	NA	NA	NA	NA	NA	NA
I_3336549	I	3336549	0.478392	PC1	4.05719	0	NA	NA	NA	NA	NA	NA	NA	NA	NA
I_3342306	I	3342306	0.18053	PC1	4.05719	0	NA	NA	NA	NA	NA	NA	NA	NA	NA
I_3349887	I	3349887	0.55182	PC1	4.05719	0	NA	NA	NA	NA	NA	NA	NA	NA	NA
I_3352455	I	3352455	0.197324	PC1	4.05719	0	NA	NA	NA	NA	NA	NA	NA	NA	NA
I_3353383	I	3353383	0.404541	PC1	4.05719	0	NA	NA	NA	NA	NA	NA	NA	NA	NA
I_3353704	I	3353704	0.0332409	PC1	4.05719	0	NA	NA	NA	NA	NA	NA	NA	NA	NA
I_3354508	I	3354508	0.331471	PC1	4.05719	0	NA	NA	NA	NA	NA	NA	NA	NA	NA
I_3355885	I	3355885	0.744723	PC1	4.05719	0	NA	NA	NA	NA	NA	NA	NA	NA	NA
I_3357536	I	3357536	0.152889	PC1	4.05719	0	NA	NA	NA	NA	NA	NA	NA	NA	NA
I_3365005	I	3365005	0.605499	PC1	4.05719	0	NA	NA	NA	NA	NA	NA	NA	NA	NA
I_3367255	I	3367255	0.25706	PC1	4.05719	0	NA	NA	NA	NA	NA	NA	NA	NA	NA
I_3373419	I	3373419	0.86923	PC1	4.05719	0	NA	NA	NA	NA	NA	NA	NA	NA	NA
I_3382620	I	3382620	0.312953	PC1	4.05719	0	NA	NA	NA	NA	NA	NA	NA	NA	NA
I_3386183	I	3386183	0.174771	PC1	4.05719	0	NA	NA	NA	NA	NA	NA	NA	NA	NA
I_3394588	I	3394588	0.451981	PC1	4.05719	0	NA	NA	NA	NA	NA	NA	NA	NA	NA
I_3397330	I	3397330	0.413222	PC1	4.05719	0	NA	NA	NA	NA	NA	NA	NA	NA	NA
I_3397547	I	3397547	0.26053	PC1	4.05719	0	NA	NA	NA	NA	NA	NA	NA	NA	NA
I_3399293	I	3399293	0.285115	PC1	4.05719	0	NA	NA	NA	NA	NA	NA	NA	NA	NA
I_3401113	I	3401113	0.17556	PC1	4.05719	0	NA	NA	NA	NA	NA	NA	NA	NA	NA
I_3402432	I	3402432	0.311039	PC1	4.05719	0	NA	NA	NA	NA	NA	NA	NA	NA	NA
I_3402540	I	3402540	0.170512	PC1	4.05719	0	NA	NA	NA	NA	NA	NA	NA	NA	NA
I_3407492	I	3407492	0.0405968	PC1	4.05719	0	NA	NA	NA	NA	NA	NA	NA	NA	NA
I_3411605	I	3411605	0.55182	PC1	4.05719	0	NA	NA	NA	NA	NA	NA	NA	NA	NA
I_3416900	I	3416900	0.438567	PC1	4.05719	0	NA	NA	NA	NA	NA	NA	NA	NA	NA
I_3416937	I	3416937	0.254225	PC1	4.05719	0	NA	NA	NA	NA	NA	NA	NA	NA	NA
I_3420242	I	3420242	0.351568	PC1	4.05719	0	NA	NA	NA	NA	NA	NA	NA	NA	NA
I_3420534	I	3420534	0.751933	PC1	4.05719	0	NA	NA	NA	NA	NA	NA	NA	NA	NA
I_3422310	I	3422310	0.230746	PC1	4.05719	0	NA	NA	NA	NA	NA	NA	NA	NA	NA
I_3425944	I	3425944	0.198223	PC1	4.05719	0	NA	NA	NA	NA	NA	NA	NA	NA	NA
I_3426142	I	3426142	0.247448	PC1	4.05719	0	NA	NA	NA	NA	NA	NA	NA	NA	NA
I_3429798	I	3429798	0.179787	PC1	4.05719	0	NA	NA	NA	NA	NA	NA	NA	NA	NA
I_3434148	I	3434148	0.316448	PC1	4.05719	0	NA	NA	NA	NA	NA	NA	NA	NA	NA
I_3435469	I	3435469	0.429752	PC1	4.05719	0	NA	NA	NA	NA	NA	NA	NA	NA	NA
I_3436471	I	3436471	0.0927546	PC1	4.05719	0	NA	NA	NA	NA	NA	NA	NA	NA	NA
I_3436908	I	3436908	0.194448	PC1	4.05719	0	NA	NA	NA	NA	NA	NA	NA	NA	NA
I_3441198	I	3441198	0.503113	PC1	4.05719	0	NA	NA	NA	NA	NA	NA	NA	NA	NA
I_3445426	I	3445426	0.635572	PC1	4.05719	0	NA	NA	NA	NA	NA	NA	NA	NA	NA
I_3449032	I	3449032	0.0564412	PC1	4.05719	0	NA	NA	NA	NA	NA	NA	NA	NA	NA
I_3450085	I	3450085	0.312953	PC1	4.05719	0	NA	NA	NA	NA	NA	NA	NA	NA	NA
I_3455323	I	3455323	0.384452	PC1	4.05719	0	NA	NA	NA	NA	NA	NA	NA	NA	NA
I_3463734	I	3463734	0.875039	PC1	4.05719	0	NA	NA	NA	NA	NA	NA	NA	NA	NA
I_3465541	I	3465541	0.185131	PC1	4.05719	0	NA	NA	NA	NA	NA	NA	NA	NA	NA
I_3465874	I	3465874	0.514516	PC1	4.05719	0	NA	NA	NA	NA	NA	NA	NA	NA	NA
I_3473790	I	3473790	1.55823	PC1	4.05719	0	NA	NA	NA	NA	NA	NA	NA	NA	NA
I_3474343	I	3474343	1.08045	PC1	4.05719	0	NA	NA	NA	NA	NA	NA	NA	NA	NA
I_3479286	I	3479286	0.470766	PC1	4.05719	0	NA	NA	NA	NA	NA	NA	NA	NA	NA
I_3481687	I	3481687	0.214263	PC1	4.05719	0	NA	NA	NA	NA	NA	NA	NA	NA	NA
I_3489021	I	3489021	0.921868	PC1	4.05719	0	NA	NA	NA	NA	NA	NA	NA	NA	NA
I_3493800	I	3493800	0.107288	PC1	4.05719	0	NA	NA	NA	NA	NA	NA	NA	NA	NA
I_3495584	I	3495584	0.0839676	PC1	4.05719	0	NA	NA	NA	NA	NA	NA	NA	NA	NA
I_3496266	I	3496266	0.474726	PC1	4.05719	0	NA	NA	NA	NA	NA	NA	NA	NA	NA
I_3507776	I	3507776	0.352935	PC1	4.05719	0	NA	NA	NA	NA	NA	NA	NA	NA	NA
I_3508315	I	3508315	0.648579	PC1	4.05719	0	NA	NA	NA	NA	NA	NA	NA	NA	NA
I_3512298	I	3512298	0.723736	PC1	4.05719	0	NA	NA	NA	NA	NA	NA	NA	NA	NA
I_3512515	I	3512515	0.443008	PC1	4.05719	0	NA	NA	NA	NA	NA	NA	NA	NA	NA
I_3514539	I	3514539	0.0935759	PC1	4.05719	0	NA	NA	NA	NA	NA	NA	NA	NA	NA
I_3524076	I	3524076	1.21497	PC1	4.05719	0	NA	NA	NA	NA	NA	NA	NA	NA	NA
I_3524078	I	3524078	0.00362311	PC1	4.05719	0	NA	NA	NA	NA	NA	NA	NA	NA	NA
I_3528877	I	3528877	0.234562	PC1	4.05719	0	NA	NA	NA	NA	NA	NA	NA	NA	NA
I_3539083	I	3539083	0.600406	PC1	4.05719	0	NA	NA	NA	NA	NA	NA	NA	NA	NA
I_3539084	I	3539084	0.365032	PC1	4.05719	0	NA	NA	NA	NA	NA	NA	NA	NA	NA
I_3539818	I	3539818	1.11745	PC1	4.05719	0	NA	NA	NA	NA	NA	NA	NA	NA	NA
I_3539920	I	3539920	0.71356	PC1	4.05719	0	NA	NA	NA	NA	NA	NA	NA	NA	NA
I_3540450	I	3540450	1.11774	PC1	4.05719	0	NA	NA	NA	NA	NA	NA	NA	NA	NA
I_3543545	I	3543545	1.01412	PC1	4.05719	0	NA	NA	NA	NA	NA	NA	NA	NA	NA
I_3547196	I	3547196	0.732158	PC1	4.05719	0	NA	NA	NA	NA	NA	NA	NA	NA	NA
I_3552124	I	3552124	0.413134	PC1	4.05719	0	NA	NA	NA	NA	NA	NA	NA	NA	NA
I_3552999	I	3552999	0.27385	PC1	4.05719	0	NA	NA	NA	NA	NA	NA	NA	NA	NA
I_3554258	I	3554258	0.493551	PC1	4.05719	0	NA	NA	NA	NA	NA	NA	NA	NA	NA
I_3557151	I	3557151	0.187675	PC1	4.05719	0	NA	NA	NA	NA	NA	NA	NA	NA	NA
I_3561321	I	3561321	0.251371	PC1	4.05719	0	NA	NA	NA	NA	NA	NA	NA	NA	NA
I_3572464	I	3572464	0.0744813	PC1	4.05719	0	NA	NA	NA	NA	NA	NA	NA	NA	NA
I_3574667	I	3574667	0.167302	PC1	4.05719	0	NA	NA	NA	NA	NA	NA	NA	NA	NA
I_3584752	I	3584752	0.429333	PC1	4.05719	0	NA	NA	NA	NA	NA	NA	NA	NA	NA
I_3586566	I	3586566	0.336963	PC1	4.05719	0	NA	NA	NA	NA	NA	NA	NA	NA	NA
I_3591403	I	3591403	0.396577	PC1	4.05719	0	NA	NA	NA	NA	NA	NA	NA	NA	NA
I_3591406	I	3591406	0.649997	PC1	4.05719	0	NA	NA	NA	NA	NA	NA	NA	NA	NA
I_3593617	I	3593617	0.0521525	PC1	4.05719	0	NA	NA	NA	NA	NA	NA	NA	NA	NA
I_3598357	I	3598357	1.38918	PC1	4.05719	0	NA	NA	NA	NA	NA	NA	NA	NA	NA
I_3598596	I	3598596	1.04096	PC1	4.05719	0	NA	NA	NA	NA	NA	NA	NA	NA	NA
I_3599570	I	3599570	0.597181	PC1	4.05719	0	NA	NA	NA	NA	NA	NA	NA	NA	NA
I_3600025	I	3600025	0.18974	PC1	4.05719	0	NA	NA	NA	NA	NA	NA	NA	NA	NA
I_3602755	I	3602755	0.421296	PC1	4.05719	0	NA	NA	NA	NA	NA	NA	NA	NA	NA
I_3602949	I	3602949	0.507745	PC1	4.05719	0	NA	NA	NA	NA	NA	NA	NA	NA	NA
I_3603389	I	3603389	0.631221	PC1	4.05719	0	NA	NA	NA	NA	NA	NA	NA	NA	NA
I_3603753	I	3603753	0.55182	PC1	4.05719	0	NA	NA	NA	NA	NA	NA	NA	NA	NA
I_3617308	I	3617308	0.999544	PC1	4.05719	0	NA	NA	NA	NA	NA	NA	NA	NA	NA
I_3619224	I	3619224	0.75769	PC1	4.05719	0	NA	NA	NA	NA	NA	NA	NA	NA	NA
I_3622453	I	3622453	1.33255	PC1	4.05719	0	NA	NA	NA	NA	NA	NA	NA	NA	NA
I_3628613	I	3628613	0.363007	PC1	4.05719	0	NA	NA	NA	NA	NA	NA	NA	NA	NA
I_3631224	I	3631224	0.0652187	PC1	4.05719	0	NA	NA	NA	NA	NA	NA	NA	NA	NA
I_3632198	I	3632198	0.152383	PC1	4.05719	0	NA	NA	NA	NA	NA	NA	NA	NA	NA
I_3636543	I	3636543	0.923471	PC1	4.05719	0	NA	NA	NA	NA	NA	NA	NA	NA	NA
I_3638826	I	3638826	1.62226	PC1	4.05719	0	NA	NA	NA	NA	NA	NA	NA	NA	NA
I_3644078	I	3644078	0.18974	PC1	4.05719	0	NA	NA	NA	NA	NA	NA	NA	NA	NA
I_3655692	I	3655692	0.363007	PC1	4.05719	0	NA	NA	NA	NA	NA	NA	NA	NA	NA
I_3656663	I	3656663	1.33255	PC1	4.05719	0	NA	NA	NA	NA	NA	NA	NA	NA	NA
I_3663456	I	3663456	0.58091	PC1	4.05719	0	NA	NA	NA	NA	NA	NA	NA	NA	NA
I_3666479	I	3666479	0.75769	PC1	4.05719	0	NA	NA	NA	NA	NA	NA	NA	NA	NA
I_3669620	I	3669620	0.718496	PC1	4.05719	0	NA	NA	NA	NA	NA	NA	NA	NA	NA
I_3671430	I	3671430	0.616205	PC1	4.05719	0	NA	NA	NA	NA	NA	NA	NA	NA	NA
I_3673319	I	3673319	0.0153891	PC1	4.05719	0	NA	NA	NA	NA	NA	NA	NA	NA	NA
I_3686343	I	3686343	0.773215	PC1	4.05719	0	NA	NA	NA	NA	NA	NA	NA	NA	NA
I_3688099	I	3688099	0.328047	PC1	4.05719	0	NA	NA	NA	NA	NA	NA	NA	NA	NA
I_3689255	I	3689255	0.678644	PC1	4.05719	0	NA	NA	NA	NA	NA	NA	NA	NA	NA
I_3689400	I	3689400	0.0932593	PC1	4.05719	0	NA	NA	NA	NA	NA	NA	NA	NA	NA
I_3689987	I	3689987	1.31302	PC1	4.05719	0	NA	NA	NA	NA	NA	NA	NA	NA	NA
I_3690226	I	3690226	1.53778	PC1	4.05719	0	NA	NA	NA	NA	NA	NA	NA	NA	NA
I_3690312	I	3690312	1.22446	PC1	4.05719	0	NA	NA	NA	NA	NA	NA	NA	NA	NA
I_3694424	I	3694424	0.815685	PC1	4.05719	0	NA	NA	NA	NA	NA	NA	NA	NA	NA
I_3698290	I	3698290	0.197693	PC1	4.05719	0	NA	NA	NA	NA	NA	NA	NA	NA	NA
I_3701578	I	3701578	0.587855	PC1	4.05719	0	NA	NA	NA	NA	NA	NA	NA	NA	NA
I_3705590	I	3705590	1.9651	PC1	4.05719	0	NA	NA	NA	NA	NA	NA	NA	NA	NA
I_3707300	I	3707300	1.48713	PC1	4.05719	0	NA	NA	NA	NA	NA	NA	NA	NA	NA
I_3710135	I	3710135	1.33255	PC1	4.05719	0	NA	NA	NA	NA	NA	NA	NA	NA	NA
I_3711216	I	3711216	2.1156	PC1	4.05719	0	NA	NA	NA	NA	NA	NA	NA	NA	NA
I_3712049	I	3712049	0.381682	PC1	4.05719	0	NA	NA	NA	NA	NA	NA	NA	NA	NA
I_3712997	I	3712997	1.07299	PC1	4.05719	0	NA	NA	NA	NA	NA	NA	NA	NA	NA
I_3713655	I	3713655	0.75769	PC1	4.05719	0	NA	NA	NA	NA	NA	NA	NA	NA	NA
I_3718046	I	3718046	1.04199	PC1	4.05719	0	NA	NA	NA	NA	NA	NA	NA	NA	NA
I_3732680	I	3732680	0.700599	PC1	4.05719	0	NA	NA	NA	NA	NA	NA	NA	NA	NA
I_3735456	I	3735456	1.33255	PC1	4.05719	0	NA	NA	NA	NA	NA	NA	NA	NA	NA
I_3739191	I	3739191	0.107288	PC1	4.05719	0	NA	NA	NA	NA	NA	NA	NA	NA	NA
I_3740869	I	3740869	0.125257	PC1	4.05719	0	NA	NA	NA	NA	NA	NA	NA	NA	NA
I_3742277	I	3742277	1.04199	PC1	4.05719	0	NA	NA	NA	NA	NA	NA	NA	NA	NA
I_3754084	I	3754084	0.381682	PC1	4.05719	0	NA	NA	NA	NA	NA	NA	NA	NA	NA
I_3756357	I	3756357	0.784587	PC1	4.05719	0	NA	NA	NA	NA	NA	NA	NA	NA	NA
I_3757514	I	3757514	0.968735	PC1	4.05719	0	NA	NA	NA	NA	NA	NA	NA	NA	NA
I_3768247	I	3768247	0.75769	PC1	4.05719	0	NA	NA	NA	NA	NA	NA	NA	NA	NA
I_3768271	I	3768271	1.33255	PC1	4.05719	0	NA	NA	NA	NA	NA	NA	NA	NA	NA
I_3769048	I	3769048	1.04199	PC1	4.05719	0	NA	NA	NA	NA	NA	NA	NA	NA	NA
I_3782283	I	3782283	0.107288	PC1	4.05719	0	NA	NA	NA	NA	NA	NA	NA	NA	NA
I_3784154	I	3784154	1.04199	PC1	4.05719	0	NA	NA	NA	NA	NA	NA	NA	NA	NA
I_3784207	I	3784207	1.33255	PC1	4.05719	0	NA	NA	NA	NA	NA	NA	NA	NA	NA
I_3788025	I	3788025	0.381682	PC1	4.05719	0	NA	NA	NA	NA	NA	NA	NA	NA	NA
I_3790000	I	3790000	1.33255	PC1	4.05719	0	NA	NA	NA	NA	NA	NA	NA	NA	NA
I_3792190	I	3792190	1.04199	PC1	4.05719	0	NA	NA	NA	NA	NA	NA	NA	NA	NA
I_3796249	I	3796249	0.197693	PC1	4.05719	0	NA	NA	NA	NA	NA	NA	NA	NA	NA
I_3803223	I	3803223	0.113399	PC1	4.05719	0	NA	NA	NA	NA	NA	NA	NA	NA	NA
I_3807959	I	3807959	0.107288	PC1	4.05719	0	NA	NA	NA	NA	NA	NA	NA	NA	NA
I_3808215	I	3808215	0.381682	PC1	4.05719	0	NA	NA	NA	NA	NA	NA	NA	NA	NA
I_3812519	I	3812519	1.04199	PC1	4.05719	0	NA	NA	NA	NA	NA	NA	NA	NA	NA
I_3829022	I	3829022	0.381682	PC1	4.05719	0	NA	NA	NA	NA	NA	NA	NA	NA	NA
I_3841592	I	3841592	0.837188	PC1	4.05719	0	NA	NA	NA	NA	NA	NA	NA	NA	NA
I_3841632	I	3841632	0.197693	PC1	4.05719	0	NA	NA	NA	NA	NA	NA	NA	NA	NA
I_3847782	I	3847782	0.417636	PC1	4.05719	0	NA	NA	NA	NA	NA	NA	NA	NA	NA
I_3852796	I	3852796	1.33255	PC1	4.05719	0	NA	NA	NA	NA	NA	NA	NA	NA	NA
I_3853477	I	3853477	0.968735	PC1	4.05719	0	NA	NA	NA	NA	NA	NA	NA	NA	NA
I_3853648	I	3853648	1.04199	PC1	4.05719	0	NA	NA	NA	NA	NA	NA	NA	NA	NA
I_3865139	I	3865139	0.859907	PC1	4.05719	0	NA	NA	NA	NA	NA	NA	NA	NA	NA
I_3880831	I	3880831	0.272543	PC1	4.05719	0	NA	NA	NA	NA	NA	NA	NA	NA	NA
I_3882189	I	3882189	0.58091	PC1	4.05719	0	NA	NA	NA	NA	NA	NA	NA	NA	NA
I_3882216	I	3882216	1.22826	PC1	4.05719	0	NA	NA	NA	NA	NA	NA	NA	NA	NA
I_3896968	I	3896968	0.0471215	PC1	4.05719	0	NA	NA	NA	NA	NA	NA	NA	NA	NA
I_3897985	I	3897985	1.33255	PC1	4.05719	0	NA	NA	NA	NA	NA	NA	NA	NA	NA
I_3904748	I	3904748	0.784587	PC1	4.05719	0	NA	NA	NA	NA	NA	NA	NA	NA	NA
I_3916347	I	3916347	0.75769	PC1	4.05719	0	NA	NA	NA	NA	NA	NA	NA	NA	NA
I_3930796	I	3930796	0.197693	PC1	4.05719	0	NA	NA	NA	NA	NA	NA	NA	NA	NA
I_3931052	I	3931052	0.00752695	PC1	4.05719	0	NA	NA	NA	NA	NA	NA	NA	NA	NA
I_3932193	I	3932193	0.205226	PC1	4.05719	0	NA	NA	NA	NA	NA	NA	NA	NA	NA
I_3932775	I	3932775	0.578867	PC1	4.05719	0	NA	NA	NA	NA	NA	NA	NA	NA	NA
I_3938690	I	3938690	0.784587	PC1	4.05719	0	NA	NA	NA	NA	NA	NA	NA	NA	NA
I_3939348	I	3939348	0.700599	PC1	4.05719	0	NA	NA	NA	NA	NA	NA	NA	NA	NA
I_3942250	I	3942250	0.111825	PC1	4.05719	0	NA	NA	NA	NA	NA	NA	NA	NA	NA
I_3946326	I	3946326	0.107288	PC1	4.05719	0	NA	NA	NA	NA	NA	NA	NA	NA	NA
I_3953235	I	3953235	1.06643	PC1	4.05719	0	NA	NA	NA	NA	NA	NA	NA	NA	NA
I_3977172	I	3977172	1.33255	PC1	4.05719	0	NA	NA	NA	NA	NA	NA	NA	NA	NA
I_3977983	I	3977983	0.985476	PC1	4.05719	0	NA	NA	NA	NA	NA	NA	NA	NA	NA
I_3997801	I	3997801	0.784587	PC1	4.05719	0	NA	NA	NA	NA	NA	NA	NA	NA	NA
I_4004615	I	4004615	0.58091	PC1	4.05719	0	NA	NA	NA	NA	NA	NA	NA	NA	NA
I_4007188	I	4007188	0.107288	PC1	4.05719	0	NA	NA	NA	NA	NA	NA	NA	NA	NA
I_4009346	I	4009346	0.197693	PC1	4.05719	0	NA	NA	NA	NA	NA	NA	NA	NA	NA
I_4012008	I	4012008	0.866897	PC1	4.05719	0	NA	NA	NA	NA	NA	NA	NA	NA	NA
I_4018396	I	4018396	0.160322	PC1	4.05719	0	NA	NA	NA	NA	NA	NA	NA	NA	NA
I_4028053	I	4028053	1.33255	PC1	4.05719	0	NA	NA	NA	NA	NA	NA	NA	NA	NA
I_4028742	I	4028742	0.354043	PC1	4.05719	0	NA	NA	NA	NA	NA	NA	NA	NA	NA
I_4030012	I	4030012	0.00964472	PC1	4.05719	0	NA	NA	NA	NA	NA	NA	NA	NA	NA
I_4030098	I	4030098	1.56477	PC1	4.05719	0	NA	NA	NA	NA	NA	NA	NA	NA	NA
I_4049669	I	4049669	0.784587	PC1	4.05719	0	NA	NA	NA	NA	NA	NA	NA	NA	NA
I_4105113	I	4105113	0.354043	PC1	4.05719	0	NA	NA	NA	NA	NA	NA	NA	NA	NA
I_4118733	I	4118733	1.33255	PC1	4.05719	0	NA	NA	NA	NA	NA	NA	NA	NA	NA
I_4121499	I	4121499	0.496377	PC1	4.05719	0	NA	NA	NA	NA	NA	NA	NA	NA	NA
I_4136707	I	4136707	0.75769	PC1	4.05719	0	NA	NA	NA	NA	NA	NA	NA	NA	NA
I_4139060	I	4139060	0.646651	PC1	4.05719	0	NA	NA	NA	NA	NA	NA	NA	NA	NA
I_4144586	I	4144586	0.0423014	PC1	4.05719	0	NA	NA	NA	NA	NA	NA	NA	NA	NA
I_4146221	I	4146221	0.967913	PC1	4.05719	0	NA	NA	NA	NA	NA	NA	NA	NA	NA
I_4148135	I	4148135	0.784587	PC1	4.05719	0	NA	NA	NA	NA	NA	NA	NA	NA	NA
I_4164036	I	4164036	0.0809405	PC1	4.05719	0	NA	NA	NA	NA	NA	NA	NA	NA	NA
I_4175984	I	4175984	1.33255	PC1	4.05719	0	NA	NA	NA	NA	NA	NA	NA	NA	NA
I_4184066	I	4184066	0.0423014	PC1	4.05719	0	NA	NA	NA	NA	NA	NA	NA	NA	NA
I_4186599	I	4186599	0.75769	PC1	4.05719	0	NA	NA	NA	NA	NA	NA	NA	NA	NA
I_4202729	I	4202729	0.774919	PC1	4.05719	0	NA	NA	NA	NA	NA	NA	NA	NA	NA
I_4209517	I	4209517	0.319152	PC1	4.05719	0	NA	NA	NA	NA	NA	NA	NA	NA	NA
I_4210159	I	4210159	0.156749	PC1	4.05719	0	NA	NA	NA	NA	NA	NA	NA	NA	NA
I_4225746	I	4225746	0.289705	PC1	4.05719	0	NA	NA	NA	NA	NA	NA	NA	NA	NA
I_4225803	I	4225803	0.67997	PC1	4.05719	0	NA	NA	NA	NA	NA	NA	NA	NA	NA
I_4226462	I	4226462	0.474726	PC1	4.05719	0	NA	NA	NA	NA	NA	NA	NA	NA	NA
I_4229554	I	4229554	0.107288	PC1	4.05719	0	NA	NA	NA	NA	NA	NA	NA	NA	NA
I_4236976	I	4236976	0.774919	PC1	4.05719	0	NA	NA	NA	NA	NA	NA	NA	NA	NA
I_4242633	I	4242633	0.154426	PC1	4.05719	0	NA	NA	NA	NA	NA	NA	NA	NA	NA
I_4242983	I	4242983	0.575515	PC1	4.05719	0	NA	NA	NA	NA	NA	NA	NA	NA	NA
I_4261434	I	4261434	1.30259	PC1	4.05719	0	NA	NA	NA	NA	NA	NA	NA	NA	NA
I_4275206	I	4275206	0.197499	PC1	4.05719	0	NA	NA	NA	NA	NA	NA	NA	NA	NA
I_4275431	I	4275431	0.582538	PC1	4.05719	0	NA	NA	NA	NA	NA	NA	NA	NA	NA
I_4301123	I	4301123	0.302807	PC1	4.05719	0	NA	NA	NA	NA	NA	NA	NA	NA	NA
I_4301267	I	4301267	1.27156	PC1	4.05719	0	NA	NA	NA	NA	NA	NA	NA	NA	NA
I_4305556	I	4305556	1.01161	PC1	4.05719	0	NA	NA	NA	NA	NA	NA	NA	NA	NA
I_4310639	I	4310639	1.04877	PC1	4.05719	0	NA	NA	NA	NA	NA	NA	NA	NA	NA
I_4316016	I	4316016	0.124702	PC1	4.05719	0	NA	NA	NA	NA	NA	NA	NA	NA	NA
I_4319143	I	4319143	0.769333	PC1	4.05719	0	NA	NA	NA	NA	NA	NA	NA	NA	NA
I_4324304	I	4324304	0.443909	PC1	4.05719	0	NA	NA	NA	NA	NA	NA	NA	NA	NA
I_4327702	I	4327702	1.21867	PC1	4.05719	0	NA	NA	NA	NA	NA	NA	NA	NA	NA
I_4328147	I	4328147	0.404513	PC1	4.05719	0	NA	NA	NA	NA	NA	NA	NA	NA	NA
I_4328426	I	4328426	0.322903	PC1	4.05719	0	NA	NA	NA	NA	NA	NA	NA	NA	NA
I_4330620	I	4330620	0.858343	PC1	4.05719	0	NA	NA	NA	NA	NA	NA	NA	NA	NA
I_4332127	I	4332127	0.414476	PC1	4.05719	0	NA	NA	NA	NA	NA	NA	NA	NA	NA
I_4336159	I	4336159	0.511768	PC1	4.05719	0	NA	NA	NA	NA	NA	NA	NA	NA	NA
I_4357553	I	4357553	0.468406	PC1	4.05719	0	NA	NA	NA	NA	NA	NA	NA	NA	NA
I_4357952	I	4357952	0.0536664	PC1	4.05719	0	NA	NA	NA	NA	NA	NA	NA	NA	NA
I_4358913	I	4358913	1.04877	PC1	4.05719	0	NA	NA	NA	NA	NA	NA	NA	NA	NA
I_4361432	I	4361432	1.30259	PC1	4.05719	0	NA	NA	NA	NA	NA	NA	NA	NA	NA
I_4365020	I	4365020	0.565277	PC1	4.05719	0	NA	NA	NA	NA	NA	NA	NA	NA	NA
I_4370151	I	4370151	0.13631	PC1	4.05719	0	NA	NA	NA	NA	NA	NA	NA	NA	NA
I_4373534	I	4373534	0.0113902	PC1	4.05719	0	NA	NA	NA	NA	NA	NA	NA	NA	NA
I_4373695	I	4373695	0.474726	PC1	4.05719	0	NA	NA	NA	NA	NA	NA	NA	NA	NA
I_4374696	I	4374696	0.124702	PC1	4.05719	0	NA	NA	NA	NA	NA	NA	NA	NA	NA
I_4384679	I	4384679	0.414476	PC1	4.05719	0	NA	NA	NA	NA	NA	NA	NA	NA	NA
I_4388560	I	4388560	1.30259	PC1	4.05719	0	NA	NA	NA	NA	NA	NA	NA	NA	NA
I_4391690	I	4391690	0.443909	PC1	4.05719	0	NA	NA	NA	NA	NA	NA	NA	NA	NA
I_4403624	I	4403624	1.04877	PC1	4.05719	0	NA	NA	NA	NA	NA	NA	NA	NA	NA
I_4405609	I	4405609	0.124702	PC1	4.05719	0	NA	NA	NA	NA	NA	NA	NA	NA	NA
I_4407713	I	4407713	0.474726	PC1	4.05719	0	NA	NA	NA	NA	NA	NA	NA	NA	NA
I_4415779	I	4415779	0.414476	PC1	4.05719	0	NA	NA	NA	NA	NA	NA	NA	NA	NA
I_4420396	I	4420396	0.070216	PC1	4.05719	0	NA	NA	NA	NA	NA	NA	NA	NA	NA
I_4421563	I	4421563	1.30259	PC1	4.05719	0	NA	NA	NA	NA	NA	NA	NA	NA	NA
I_4421776	I	4421776	1.21867	PC1	4.05719	0	NA	NA	NA	NA	NA	NA	NA	NA	NA
I_4432027	I	4432027	1.04877	PC1	4.05719	0	NA	NA	NA	NA	NA	NA	NA	NA	NA
I_4434008	I	4434008	0.474726	PC1	4.05719	0	NA	NA	NA	NA	NA	NA	NA	NA	NA
I_4439242	I	4439242	1.21637	PC1	4.05719	0	NA	NA	NA	NA	NA	NA	NA	NA	NA
I_4446716	I	4446716	0.414476	PC1	4.05719	0	NA	NA	NA	NA	NA	NA	NA	NA	NA
I_4448673	I	4448673	0.744978	PC1	4.05719	0	NA	NA	NA	NA	NA	NA	NA	NA	NA
I_4448977	I	4448977	0.0147087	PC1	4.05719	0	NA	NA	NA	NA	NA	NA	NA	NA	NA
I_4449799	I	4449799	1.21867	PC1	4.05719	0	NA	NA	NA	NA	NA	NA	NA	NA	NA
I_4451410	I	4451410	0.4417	PC1	4.05719	0	NA	NA	NA	NA	NA	NA	NA	NA	NA
I_4453527	I	4453527	0.375314	PC1	4.05719	0	NA	NA	NA	NA	NA	NA	NA	NA	NA
I_4466278	I	4466278	1.21867	PC1	4.05719	0	NA	NA	NA	NA	NA	NA	NA	NA	NA
I_4477427	I	4477427	1.33255	PC1	4.05719	0	NA	NA	NA	NA	NA	NA	NA	NA	NA
I_4478286	I	4478286	0.75769	PC1	4.05719	0	NA	NA	NA	NA	NA	NA	NA	NA	NA
I_4483103	I	4483103	1.27936	PC1	4.05719	0	NA	NA	NA	NA	NA	NA	NA	NA	NA
I_4483252	I	4483252	0.768529	PC1	4.05719	0	NA	NA	NA	NA	NA	NA	NA	NA	NA
I_4489655	I	4489655	0.146958	PC1	4.05719	0	NA	NA	NA	NA	NA	NA	NA	NA	NA
I_4510510	I	4510510	0.20945	PC1	4.05719	0	NA	NA	NA	NA	NA	NA	NA	NA	NA
I_4511577	I	4511577	0.687028	PC1	4.05719	0	NA	NA	NA	NA	NA	NA	NA	NA	NA
I_4511801	I	4511801	0.405401	PC1	4.05719	0	NA	NA	NA	NA	NA	NA	NA	NA	NA
I_4513340	I	4513340	1.00134	PC1	4.05719	0	NA	NA	NA	NA	NA	NA	NA	NA	NA
I_4521754	I	4521754	0.174915	PC1	4.05719	0	NA	NA	NA	NA	NA	NA	NA	NA	NA
I_4527599	I	4527599	0.100674	PC1	4.05719	0	NA	NA	NA	NA	NA	NA	NA	NA	NA
I_4531321	I	4531321	0.474726	PC1	4.05719	0	NA	NA	NA	NA	NA	NA	NA	NA	NA
I_4561054	I	4561054	0.20945	PC1	4.05719	0	NA	NA	NA	NA	NA	NA	NA	NA	NA
I_4563732	I	4563732	0.687028	PC1	4.05719	0	NA	NA	NA	NA	NA	NA	NA	NA	NA
I_4563986	I	4563986	0.405401	PC1	4.05719	0	NA	NA	NA	NA	NA	NA	NA	NA	NA
I_4564836	I	4564836	0.107288	PC1	4.05719	0	NA	NA	NA	NA	NA	NA	NA	NA	NA
I_4576986	I	4576986	0.363549	PC1	4.05719	0	NA	NA	NA	NA	NA	NA	NA	NA	NA
I_4593013	I	4593013	0.25301	PC1	4.05719	0	NA	NA	NA	NA	NA	NA	NA	NA	NA
I_4593675	I	4593675	0.431681	PC1	4.05719	0	NA	NA	NA	NA	NA	NA	NA	NA	NA
I_4594490	I	4594490	0.693299	PC1	4.05719	0	NA	NA	NA	NA	NA	NA	NA	NA	NA
I_4595038	I	4595038	0.687028	PC1	4.05719	0	NA	NA	NA	NA	NA	NA	NA	NA	NA
I_4596315	I	4596315	0.107288	PC1	4.05719	0	NA	NA	NA	NA	NA	NA	NA	NA	NA
I_4605474	I	4605474	0.335992	PC1	4.05719	0	NA	NA	NA	NA	NA	NA	NA	NA	NA
I_4607506	I	4607506	0.187626	PC1	4.05719	0	NA	NA	NA	NA	NA	NA	NA	NA	NA
I_4609835	I	4609835	1.39371	PC1	4.05719	0	NA	NA	NA	NA	NA	NA	NA	NA	NA
I_4621719	I	4621719	0.474726	PC1	4.05719	0	NA	NA	NA	NA	NA	NA	NA	NA	NA
I_4622241	I	4622241	0.308643	PC1	4.05719	0	NA	NA	NA	NA	NA	NA	NA	NA	NA
I_4628447	I	4628447	0.687028	PC1	4.05719	0	NA	NA	NA	NA	NA	NA	NA	NA	NA
I_4630076	I	4630076	0.187626	PC1	4.05719	0	NA	NA	NA	NA	NA	NA	NA	NA	NA
I_4630737	I	4630737	0.335992	PC1	4.05719	0	NA	NA	NA	NA	NA	NA	NA	NA	NA
I_4631398	I	4631398	0.107288	PC1	4.05719	0	NA	NA	NA	NA	NA	NA	NA	NA	NA
I_4631778	I	4631778	0.134111	PC1	4.05719	0	NA	NA	NA	NA	NA	NA	NA	NA	NA
I_4633612	I	4633612	0.630032	PC1	4.05719	0	NA	NA	NA	NA	NA	NA	NA	NA	NA
I_4636178	I	4636178	1.40965	PC1	4.05719	0	NA	NA	NA	NA	NA	NA	NA	NA	NA
I_4644600	I	4644600	0.207091	PC1	4.05719	0	NA	NA	NA	NA	NA	NA	NA	NA	NA
I_4650694	I	4650694	0.474726	PC1	4.05719	0	NA	NA	NA	NA	NA	NA	NA	NA	NA
I_4653739	I	4653739	0.839522	PC1	4.05719	0	NA	NA	NA	NA	NA	NA	NA	NA	NA
I_4659496	I	4659496	0.285331	PC1	4.05719	0	NA	NA	NA	NA	NA	NA	NA	NA	NA
I_4661359	I	4661359	0.0789953	PC1	4.05719	0	NA	NA	NA	NA	NA	NA	NA	NA	NA
I_4662580	I	4662580	0.305734	PC1	4.05719	0	NA	NA	NA	NA	NA	NA	NA	NA	NA
I_4662768	I	4662768	0.140968	PC1	4.05719	0	NA	NA	NA	NA	NA	NA	NA	NA	NA
I_4668159	I	4668159	0.431681	PC1	4.05719	0	NA	NA	NA	NA	NA	NA	NA	NA	NA
I_4669821	I	4669821	0.0748621	PC1	4.05719	0	NA	NA	NA	NA	NA	NA	NA	NA	NA
I_4671786	I	4671786	0.474726	PC1	4.05719	0	NA	NA	NA	NA	NA	NA	NA	NA	NA
I_4686023	I	4686023	1.1608	PC1	4.05719	0	NA	NA	NA	NA	NA	NA	NA	NA	NA
I_4687429	I	4687429	0.687028	PC1	4.05719	0	NA	NA	NA	NA	NA	NA	NA	NA	NA
I_4691442	I	4691442	0.630032	PC1	4.05719	0	NA	NA	NA	NA	NA	NA	NA	NA	NA
I_4696211	I	4696211	0.0594127	PC1	4.05719	0	NA	NA	NA	NA	NA	NA	NA	NA	NA
I_4696683	I	4696683	0.058164	PC1	4.05719	0	NA	NA	NA	NA	NA	NA	NA	NA	NA
I_4696691	I	4696691	0.285331	PC1	4.05719	0	NA	NA	NA	NA	NA	NA	NA	NA	NA
I_4705819	I	4705819	0.474726	PC1	4.05719	0	NA	NA	NA	NA	NA	NA	NA	NA	NA
I_4710200	I	4710200	0.333464	PC1	4.05719	0	NA	NA	NA	NA	NA	NA	NA	NA	NA
I_4710525	I	4710525	1.40965	PC1	4.05719	0	NA	NA	NA	NA	NA	NA	NA	NA	NA
I_4722280	I	4722280	0.630032	PC1	4.05719	0	NA	NA	NA	NA	NA	NA	NA	NA	NA
I_4727684	I	4727684	0.2683	PC1	4.05719	0	NA	NA	NA	NA	NA	NA	NA	NA	NA
I_4735590	I	4735590	0.0445406	PC1	4.05719	0	NA	NA	NA	NA	NA	NA	NA	NA	NA
I_4739024	I	4739024	0.694099	PC1	4.05719	0	NA	NA	NA	NA	NA	NA	NA	NA	NA
I_4741347	I	4741347	0.431681	PC1	4.05719	0	NA	NA	NA	NA	NA	NA	NA	NA	NA
I_4748710	I	4748710	0.0313778	PC1	4.05719	0	NA	NA	NA	NA	NA	NA	NA	NA	NA
I_4750006	I	4750006	0.0511585	PC1	4.05719	0	NA	NA	NA	NA	NA	NA	NA	NA	NA
I_4754801	I	4754801	0.464894	PC1	4.05719	0	NA	NA	NA	NA	NA	NA	NA	NA	NA
I_4763260	I	4763260	0.564891	PC1	4.05719	0	NA	NA	NA	NA	NA	NA	NA	NA	NA
[truncated: 44,994 more rows]

## Sheet: Slope_mapping
marker	CHROM	POS	log10p	trait	BF	aboveBF	strain	value	allele	var.exp	startPOS	peakPOS	endPOS	peak_id	interval_size
I_5317	I	5317	0.19528	Slope	4.05719	0	NA	NA	NA	NA	NA	NA	NA	NA	NA
I_7565	I	7565	0.249742	Slope	4.05719	0	NA	NA	NA	NA	NA	NA	NA	NA	NA
I_8174	I	8174	0.268546	Slope	4.05719	0	NA	NA	NA	NA	NA	NA	NA	NA	NA
I_10291	I	10291	0.297694	Slope	4.05719	0	NA	NA	NA	NA	NA	NA	NA	NA	NA
I_12921	I	12921	0.267729	Slope	4.05719	0	NA	NA	NA	NA	NA	NA	NA	NA	NA
I_15024	I	15024	0.0273651	Slope	4.05719	0	NA	NA	NA	NA	NA	NA	NA	NA	NA
I_16266	I	16266	0.233078	Slope	4.05719	0	NA	NA	NA	NA	NA	NA	NA	NA	NA
I_17509	I	17509	0.612484	Slope	4.05719	0	NA	NA	NA	NA	NA	NA	NA	NA	NA
I_30896	I	30896	0.224678	Slope	4.05719	0	NA	NA	NA	NA	NA	NA	NA	NA	NA
I_32533	I	32533	0.00388098	Slope	4.05719	0	NA	NA	NA	NA	NA	NA	NA	NA	NA
I_33667	I	33667	0.19528	Slope	4.05719	0	NA	NA	NA	NA	NA	NA	NA	NA	NA
I_36410	I	36410	0.249742	Slope	4.05719	0	NA	NA	NA	NA	NA	NA	NA	NA	NA
I_36666	I	36666	0.267729	Slope	4.05719	0	NA	NA	NA	NA	NA	NA	NA	NA	NA
I_41657	I	41657	0.268546	Slope	4.05719	0	NA	NA	NA	NA	NA	NA	NA	NA	NA
I_43806	I	43806	0.233078	Slope	4.05719	0	NA	NA	NA	NA	NA	NA	NA	NA	NA
I_46655	I	46655	0.376111	Slope	4.05719	0	NA	NA	NA	NA	NA	NA	NA	NA	NA
I_47642	I	47642	0.0952254	Slope	4.05719	0	NA	NA	NA	NA	NA	NA	NA	NA	NA
I_62642	I	62642	0.687713	Slope	4.05719	0	NA	NA	NA	NA	NA	NA	NA	NA	NA
I_64161	I	64161	0.268546	Slope	4.05719	0	NA	NA	NA	NA	NA	NA	NA	NA	NA
I_64950	I	64950	0.19528	Slope	4.05719	0	NA	NA	NA	NA	NA	NA	NA	NA	NA
I_68640	I	68640	0.267729	Slope	4.05719	0	NA	NA	NA	NA	NA	NA	NA	NA	NA
I_76311	I	76311	0.0952254	Slope	4.05719	0	NA	NA	NA	NA	NA	NA	NA	NA	NA
I_91269	I	91269	0.233078	Slope	4.05719	0	NA	NA	NA	NA	NA	NA	NA	NA	NA
I_99548	I	99548	0.297694	Slope	4.05719	0	NA	NA	NA	NA	NA	NA	NA	NA	NA
I_105133	I	105133	0.19528	Slope	4.05719	0	NA	NA	NA	NA	NA	NA	NA	NA	NA
I_105242	I	105242	0.267729	Slope	4.05719	0	NA	NA	NA	NA	NA	NA	NA	NA	NA
I_105302	I	105302	0.268546	Slope	4.05719	0	NA	NA	NA	NA	NA	NA	NA	NA	NA
I_107175	I	107175	0.184984	Slope	4.05719	0	NA	NA	NA	NA	NA	NA	NA	NA	NA
I_116338	I	116338	0.244546	Slope	4.05719	0	NA	NA	NA	NA	NA	NA	NA	NA	NA
I_122734	I	122734	0.233078	Slope	4.05719	0	NA	NA	NA	NA	NA	NA	NA	NA	NA
I_131808	I	131808	0.297694	Slope	4.05719	0	NA	NA	NA	NA	NA	NA	NA	NA	NA
I_134997	I	134997	0.19528	Slope	4.05719	0	NA	NA	NA	NA	NA	NA	NA	NA	NA
I_135132	I	135132	0.0952254	Slope	4.05719	0	NA	NA	NA	NA	NA	NA	NA	NA	NA
I_136765	I	136765	0.268546	Slope	4.05719	0	NA	NA	NA	NA	NA	NA	NA	NA	NA
I_141329	I	141329	0.149641	Slope	4.05719	0	NA	NA	NA	NA	NA	NA	NA	NA	NA
I_144778	I	144778	0.267729	Slope	4.05719	0	NA	NA	NA	NA	NA	NA	NA	NA	NA
I_148495	I	148495	0.159331	Slope	4.05719	0	NA	NA	NA	NA	NA	NA	NA	NA	NA
I_161015	I	161015	0.528404	Slope	4.05719	0	NA	NA	NA	NA	NA	NA	NA	NA	NA
I_161490	I	161490	0.612484	Slope	4.05719	0	NA	NA	NA	NA	NA	NA	NA	NA	NA
I_162406	I	162406	0.233078	Slope	4.05719	0	NA	NA	NA	NA	NA	NA	NA	NA	NA
I_164048	I	164048	0.297694	Slope	4.05719	0	NA	NA	NA	NA	NA	NA	NA	NA	NA
I_166880	I	166880	0.19528	Slope	4.05719	0	NA	NA	NA	NA	NA	NA	NA	NA	NA
I_170568	I	170568	0.268546	Slope	4.05719	0	NA	NA	NA	NA	NA	NA	NA	NA	NA
I_172908	I	172908	0.0952254	Slope	4.05719	0	NA	NA	NA	NA	NA	NA	NA	NA	NA
I_176206	I	176206	0.0705657	Slope	4.05719	0	NA	NA	NA	NA	NA	NA	NA	NA	NA
I_184470	I	184470	0.0273651	Slope	4.05719	0	NA	NA	NA	NA	NA	NA	NA	NA	NA
I_200231	I	200231	0.233078	Slope	4.05719	0	NA	NA	NA	NA	NA	NA	NA	NA	NA
I_206753	I	206753	0.267729	Slope	4.05719	0	NA	NA	NA	NA	NA	NA	NA	NA	NA
I_208245	I	208245	0.268546	Slope	4.05719	0	NA	NA	NA	NA	NA	NA	NA	NA	NA
I_209800	I	209800	0.19528	Slope	4.05719	0	NA	NA	NA	NA	NA	NA	NA	NA	NA
I_210602	I	210602	0.297694	Slope	4.05719	0	NA	NA	NA	NA	NA	NA	NA	NA	NA
I_212949	I	212949	0.0952254	Slope	4.05719	0	NA	NA	NA	NA	NA	NA	NA	NA	NA
I_233154	I	233154	0.184984	Slope	4.05719	0	NA	NA	NA	NA	NA	NA	NA	NA	NA
I_241751	I	241751	0.158151	Slope	4.05719	0	NA	NA	NA	NA	NA	NA	NA	NA	NA
I_242133	I	242133	0.249742	Slope	4.05719	0	NA	NA	NA	NA	NA	NA	NA	NA	NA
I_257676	I	257676	0.297694	Slope	4.05719	0	NA	NA	NA	NA	NA	NA	NA	NA	NA
I_258159	I	258159	0.19528	Slope	4.05719	0	NA	NA	NA	NA	NA	NA	NA	NA	NA
I_258951	I	258951	0.268546	Slope	4.05719	0	NA	NA	NA	NA	NA	NA	NA	NA	NA
I_261900	I	261900	0.20877	Slope	4.05719	0	NA	NA	NA	NA	NA	NA	NA	NA	NA
I_265285	I	265285	0.267729	Slope	4.05719	0	NA	NA	NA	NA	NA	NA	NA	NA	NA
I_275446	I	275446	0.00404067	Slope	4.05719	0	NA	NA	NA	NA	NA	NA	NA	NA	NA
I_276422	I	276422	0.0335386	Slope	4.05719	0	NA	NA	NA	NA	NA	NA	NA	NA	NA
I_276983	I	276983	0.0740449	Slope	4.05719	0	NA	NA	NA	NA	NA	NA	NA	NA	NA
I_279038	I	279038	0.268546	Slope	4.05719	0	NA	NA	NA	NA	NA	NA	NA	NA	NA
I_279389	I	279389	0.0952254	Slope	4.05719	0	NA	NA	NA	NA	NA	NA	NA	NA	NA
I_280420	I	280420	0.159331	Slope	4.05719	0	NA	NA	NA	NA	NA	NA	NA	NA	NA
I_284473	I	284473	0.297694	Slope	4.05719	0	NA	NA	NA	NA	NA	NA	NA	NA	NA
I_289771	I	289771	0.267729	Slope	4.05719	0	NA	NA	NA	NA	NA	NA	NA	NA	NA
I_290682	I	290682	0.19528	Slope	4.05719	0	NA	NA	NA	NA	NA	NA	NA	NA	NA
I_293295	I	293295	0.233078	Slope	4.05719	0	NA	NA	NA	NA	NA	NA	NA	NA	NA
I_314248	I	314248	0.612484	Slope	4.05719	0	NA	NA	NA	NA	NA	NA	NA	NA	NA
I_315543	I	315543	0.268546	Slope	4.05719	0	NA	NA	NA	NA	NA	NA	NA	NA	NA
I_316509	I	316509	0.0952254	Slope	4.05719	0	NA	NA	NA	NA	NA	NA	NA	NA	NA
I_316697	I	316697	0.297694	Slope	4.05719	0	NA	NA	NA	NA	NA	NA	NA	NA	NA
I_321873	I	321873	0.267729	Slope	4.05719	0	NA	NA	NA	NA	NA	NA	NA	NA	NA
I_325480	I	325480	0.233078	Slope	4.05719	0	NA	NA	NA	NA	NA	NA	NA	NA	NA
I_329119	I	329119	0.00388098	Slope	4.05719	0	NA	NA	NA	NA	NA	NA	NA	NA	NA
I_329345	I	329345	0.19528	Slope	4.05719	0	NA	NA	NA	NA	NA	NA	NA	NA	NA
I_345372	I	345372	0.126811	Slope	4.05719	0	NA	NA	NA	NA	NA	NA	NA	NA	NA
I_358866	I	358866	0.268546	Slope	4.05719	0	NA	NA	NA	NA	NA	NA	NA	NA	NA
I_362395	I	362395	0.129573	Slope	4.05719	0	NA	NA	NA	NA	NA	NA	NA	NA	NA
I_363877	I	363877	0.0952254	Slope	4.05719	0	NA	NA	NA	NA	NA	NA	NA	NA	NA
I_368392	I	368392	0.0683117	Slope	4.05719	0	NA	NA	NA	NA	NA	NA	NA	NA	NA
I_370339	I	370339	0.0273651	Slope	4.05719	0	NA	NA	NA	NA	NA	NA	NA	NA	NA
I_377648	I	377648	0.19528	Slope	4.05719	0	NA	NA	NA	NA	NA	NA	NA	NA	NA
I_377706	I	377706	0.019414	Slope	4.05719	0	NA	NA	NA	NA	NA	NA	NA	NA	NA
I_379448	I	379448	0.546272	Slope	4.05719	0	NA	NA	NA	NA	NA	NA	NA	NA	NA
I_379475	I	379475	0.267729	Slope	4.05719	0	NA	NA	NA	NA	NA	NA	NA	NA	NA
I_391502	I	391502	0.497805	Slope	4.05719	0	NA	NA	NA	NA	NA	NA	NA	NA	NA
I_395423	I	395423	0.0855004	Slope	4.05719	0	NA	NA	NA	NA	NA	NA	NA	NA	NA
I_398235	I	398235	0.268546	Slope	4.05719	0	NA	NA	NA	NA	NA	NA	NA	NA	NA
I_411686	I	411686	0.126811	Slope	4.05719	0	NA	NA	NA	NA	NA	NA	NA	NA	NA
I_413008	I	413008	0.158151	Slope	4.05719	0	NA	NA	NA	NA	NA	NA	NA	NA	NA
I_417076	I	417076	0.131017	Slope	4.05719	0	NA	NA	NA	NA	NA	NA	NA	NA	NA
I_417787	I	417787	0.26767	Slope	4.05719	0	NA	NA	NA	NA	NA	NA	NA	NA	NA
I_418319	I	418319	0.138329	Slope	4.05719	0	NA	NA	NA	NA	NA	NA	NA	NA	NA
I_424209	I	424209	0.19528	Slope	4.05719	0	NA	NA	NA	NA	NA	NA	NA	NA	NA
I_425626	I	425626	0.369623	Slope	4.05719	0	NA	NA	NA	NA	NA	NA	NA	NA	NA
I_425673	I	425673	0.0537279	Slope	4.05719	0	NA	NA	NA	NA	NA	NA	NA	NA	NA
I_428363	I	428363	0.612484	Slope	4.05719	0	NA	NA	NA	NA	NA	NA	NA	NA	NA
I_431736	I	431736	0.370088	Slope	4.05719	0	NA	NA	NA	NA	NA	NA	NA	NA	NA
I_432210	I	432210	0.297694	Slope	4.05719	0	NA	NA	NA	NA	NA	NA	NA	NA	NA
I_438177	I	438177	0.267729	Slope	4.05719	0	NA	NA	NA	NA	NA	NA	NA	NA	NA
I_442895	I	442895	0.19528	Slope	4.05719	0	NA	NA	NA	NA	NA	NA	NA	NA	NA
I_443513	I	443513	0.0525245	Slope	4.05719	0	NA	NA	NA	NA	NA	NA	NA	NA	NA
I_446900	I	446900	0.0221627	Slope	4.05719	0	NA	NA	NA	NA	NA	NA	NA	NA	NA
I_448204	I	448204	0.0921168	Slope	4.05719	0	NA	NA	NA	NA	NA	NA	NA	NA	NA
I_449122	I	449122	0.370088	Slope	4.05719	0	NA	NA	NA	NA	NA	NA	NA	NA	NA
I_449393	I	449393	0.297694	Slope	4.05719	0	NA	NA	NA	NA	NA	NA	NA	NA	NA
I_452643	I	452643	0.664805	Slope	4.05719	0	NA	NA	NA	NA	NA	NA	NA	NA	NA
I_453292	I	453292	0.318011	Slope	4.05719	0	NA	NA	NA	NA	NA	NA	NA	NA	NA
I_465493	I	465493	0.42066	Slope	4.05719	0	NA	NA	NA	NA	NA	NA	NA	NA	NA
I_466067	I	466067	0.0273651	Slope	4.05719	0	NA	NA	NA	NA	NA	NA	NA	NA	NA
I_467367	I	467367	0.19528	Slope	4.05719	0	NA	NA	NA	NA	NA	NA	NA	NA	NA
I_468544	I	468544	0.0111373	Slope	4.05719	0	NA	NA	NA	NA	NA	NA	NA	NA	NA
I_470862	I	470862	0.246943	Slope	4.05719	0	NA	NA	NA	NA	NA	NA	NA	NA	NA
I_473739	I	473739	0.370088	Slope	4.05719	0	NA	NA	NA	NA	NA	NA	NA	NA	NA
I_473991	I	473991	0.332167	Slope	4.05719	0	NA	NA	NA	NA	NA	NA	NA	NA	NA
I_476760	I	476760	0.121922	Slope	4.05719	0	NA	NA	NA	NA	NA	NA	NA	NA	NA
I_484761	I	484761	0.42066	Slope	4.05719	0	NA	NA	NA	NA	NA	NA	NA	NA	NA
I_485871	I	485871	0.318011	Slope	4.05719	0	NA	NA	NA	NA	NA	NA	NA	NA	NA
I_486474	I	486474	0.297694	Slope	4.05719	0	NA	NA	NA	NA	NA	NA	NA	NA	NA
I_488232	I	488232	0.0111373	Slope	4.05719	0	NA	NA	NA	NA	NA	NA	NA	NA	NA
I_490346	I	490346	0.19528	Slope	4.05719	0	NA	NA	NA	NA	NA	NA	NA	NA	NA
I_490754	I	490754	0.246943	Slope	4.05719	0	NA	NA	NA	NA	NA	NA	NA	NA	NA
I_494188	I	494188	0.370088	Slope	4.05719	0	NA	NA	NA	NA	NA	NA	NA	NA	NA
I_495881	I	495881	0.612484	Slope	4.05719	0	NA	NA	NA	NA	NA	NA	NA	NA	NA
I_497133	I	497133	0.298514	Slope	4.05719	0	NA	NA	NA	NA	NA	NA	NA	NA	NA
I_511635	I	511635	0.318011	Slope	4.05719	0	NA	NA	NA	NA	NA	NA	NA	NA	NA
I_513134	I	513134	0.0234974	Slope	4.05719	0	NA	NA	NA	NA	NA	NA	NA	NA	NA
I_516767	I	516767	0.0552968	Slope	4.05719	0	NA	NA	NA	NA	NA	NA	NA	NA	NA
I_519493	I	519493	0.0215696	Slope	4.05719	0	NA	NA	NA	NA	NA	NA	NA	NA	NA
I_520486	I	520486	0.0530606	Slope	4.05719	0	NA	NA	NA	NA	NA	NA	NA	NA	NA
I_520966	I	520966	0.0295484	Slope	4.05719	0	NA	NA	NA	NA	NA	NA	NA	NA	NA
I_522382	I	522382	0.0731727	Slope	4.05719	0	NA	NA	NA	NA	NA	NA	NA	NA	NA
I_523479	I	523479	0.154996	Slope	4.05719	0	NA	NA	NA	NA	NA	NA	NA	NA	NA
I_525192	I	525192	0.246943	Slope	4.05719	0	NA	NA	NA	NA	NA	NA	NA	NA	NA
I_528981	I	528981	0.0403142	Slope	4.05719	0	NA	NA	NA	NA	NA	NA	NA	NA	NA
I_530262	I	530262	0.318011	Slope	4.05719	0	NA	NA	NA	NA	NA	NA	NA	NA	NA
I_530384	I	530384	0.19528	Slope	4.05719	0	NA	NA	NA	NA	NA	NA	NA	NA	NA
I_530978	I	530978	0.221978	Slope	4.05719	0	NA	NA	NA	NA	NA	NA	NA	NA	NA
I_533815	I	533815	0.126811	Slope	4.05719	0	NA	NA	NA	NA	NA	NA	NA	NA	NA
I_543011	I	543011	0.0273651	Slope	4.05719	0	NA	NA	NA	NA	NA	NA	NA	NA	NA
I_543021	I	543021	0.479324	Slope	4.05719	0	NA	NA	NA	NA	NA	NA	NA	NA	NA
I_544477	I	544477	0.268546	Slope	4.05719	0	NA	NA	NA	NA	NA	NA	NA	NA	NA
I_545468	I	545468	0.0234974	Slope	4.05719	0	NA	NA	NA	NA	NA	NA	NA	NA	NA
I_547904	I	547904	0.238119	Slope	4.05719	0	NA	NA	NA	NA	NA	NA	NA	NA	NA
I_549963	I	549963	0.42066	Slope	4.05719	0	NA	NA	NA	NA	NA	NA	NA	NA	NA
I_551501	I	551501	0.0560803	Slope	4.05719	0	NA	NA	NA	NA	NA	NA	NA	NA	NA
I_559307	I	559307	0.246943	Slope	4.05719	0	NA	NA	NA	NA	NA	NA	NA	NA	NA
I_564889	I	564889	0.19528	Slope	4.05719	0	NA	NA	NA	NA	NA	NA	NA	NA	NA
I_565394	I	565394	0.58091	Slope	4.05719	0	NA	NA	NA	NA	NA	NA	NA	NA	NA
I_571535	I	571535	1.3707	Slope	4.05719	0	NA	NA	NA	NA	NA	NA	NA	NA	NA
I_573005	I	573005	0.318011	Slope	4.05719	0	NA	NA	NA	NA	NA	NA	NA	NA	NA
I_575526	I	575526	0.316139	Slope	4.05719	0	NA	NA	NA	NA	NA	NA	NA	NA	NA
I_578182	I	578182	1.49548	Slope	4.05719	0	NA	NA	NA	NA	NA	NA	NA	NA	NA
I_590598	I	590598	0.0234974	Slope	4.05719	0	NA	NA	NA	NA	NA	NA	NA	NA	NA
I_592825	I	592825	0.297694	Slope	4.05719	0	NA	NA	NA	NA	NA	NA	NA	NA	NA
I_595105	I	595105	0.560387	Slope	4.05719	0	NA	NA	NA	NA	NA	NA	NA	NA	NA
I_598523	I	598523	0.246943	Slope	4.05719	0	NA	NA	NA	NA	NA	NA	NA	NA	NA
I_603304	I	603304	0.234102	Slope	4.05719	0	NA	NA	NA	NA	NA	NA	NA	NA	NA
I_606563	I	606563	1.71361	Slope	4.05719	0	NA	NA	NA	NA	NA	NA	NA	NA	NA
I_606864	I	606864	0.0864593	Slope	4.05719	0	NA	NA	NA	NA	NA	NA	NA	NA	NA
I_612955	I	612955	0.318011	Slope	4.05719	0	NA	NA	NA	NA	NA	NA	NA	NA	NA
I_614817	I	614817	0.19528	Slope	4.05719	0	NA	NA	NA	NA	NA	NA	NA	NA	NA
I_630429	I	630429	0.385286	Slope	4.05719	0	NA	NA	NA	NA	NA	NA	NA	NA	NA
I_634416	I	634416	0.547235	Slope	4.05719	0	NA	NA	NA	NA	NA	NA	NA	NA	NA
I_634724	I	634724	0.0709426	Slope	4.05719	0	NA	NA	NA	NA	NA	NA	NA	NA	NA
I_638022	I	638022	0.559307	Slope	4.05719	0	NA	NA	NA	NA	NA	NA	NA	NA	NA
I_644287	I	644287	0.157711	Slope	4.05719	0	NA	NA	NA	NA	NA	NA	NA	NA	NA
I_646229	I	646229	0.0342769	Slope	4.05719	0	NA	NA	NA	NA	NA	NA	NA	NA	NA
I_647430	I	647430	0.318011	Slope	4.05719	0	NA	NA	NA	NA	NA	NA	NA	NA	NA
I_648306	I	648306	0.347449	Slope	4.05719	0	NA	NA	NA	NA	NA	NA	NA	NA	NA
I_653481	I	653481	0.183154	Slope	4.05719	0	NA	NA	NA	NA	NA	NA	NA	NA	NA
I_655131	I	655131	0.182579	Slope	4.05719	0	NA	NA	NA	NA	NA	NA	NA	NA	NA
I_655377	I	655377	0.434358	Slope	4.05719	0	NA	NA	NA	NA	NA	NA	NA	NA	NA
I_656310	I	656310	0.247642	Slope	4.05719	0	NA	NA	NA	NA	NA	NA	NA	NA	NA
I_656356	I	656356	0.0911181	Slope	4.05719	0	NA	NA	NA	NA	NA	NA	NA	NA	NA
I_659705	I	659705	0.178845	Slope	4.05719	0	NA	NA	NA	NA	NA	NA	NA	NA	NA
I_660382	I	660382	0.38527	Slope	4.05719	0	NA	NA	NA	NA	NA	NA	NA	NA	NA
I_664603	I	664603	0.135908	Slope	4.05719	0	NA	NA	NA	NA	NA	NA	NA	NA	NA
I_664678	I	664678	0.558906	Slope	4.05719	0	NA	NA	NA	NA	NA	NA	NA	NA	NA
I_667420	I	667420	0.213794	Slope	4.05719	0	NA	NA	NA	NA	NA	NA	NA	NA	NA
I_675688	I	675688	0.0477343	Slope	4.05719	0	NA	NA	NA	NA	NA	NA	NA	NA	NA
I_675812	I	675812	0.012597	Slope	4.05719	0	NA	NA	NA	NA	NA	NA	NA	NA	NA
I_682522	I	682522	0.02632	Slope	4.05719	0	NA	NA	NA	NA	NA	NA	NA	NA	NA
I_685183	I	685183	0.0273106	Slope	4.05719	0	NA	NA	NA	NA	NA	NA	NA	NA	NA
I_690447	I	690447	0.185349	Slope	4.05719	0	NA	NA	NA	NA	NA	NA	NA	NA	NA
I_690570	I	690570	0.318011	Slope	4.05719	0	NA	NA	NA	NA	NA	NA	NA	NA	NA
I_691329	I	691329	0.00316838	Slope	4.05719	0	NA	NA	NA	NA	NA	NA	NA	NA	NA
I_691639	I	691639	0.42066	Slope	4.05719	0	NA	NA	NA	NA	NA	NA	NA	NA	NA
I_694829	I	694829	0.514377	Slope	4.05719	0	NA	NA	NA	NA	NA	NA	NA	NA	NA
I_695386	I	695386	0.581517	Slope	4.05719	0	NA	NA	NA	NA	NA	NA	NA	NA	NA
I_703316	I	703316	0.813873	Slope	4.05719	0	NA	NA	NA	NA	NA	NA	NA	NA	NA
I_704341	I	704341	0.424452	Slope	4.05719	0	NA	NA	NA	NA	NA	NA	NA	NA	NA
I_705454	I	705454	0.209923	Slope	4.05719	0	NA	NA	NA	NA	NA	NA	NA	NA	NA
I_706183	I	706183	0.530463	Slope	4.05719	0	NA	NA	NA	NA	NA	NA	NA	NA	NA
I_708066	I	708066	0.300129	Slope	4.05719	0	NA	NA	NA	NA	NA	NA	NA	NA	NA
I_714900	I	714900	0.255317	Slope	4.05719	0	NA	NA	NA	NA	NA	NA	NA	NA	NA
I_716699	I	716699	0.370088	Slope	4.05719	0	NA	NA	NA	NA	NA	NA	NA	NA	NA
I_721920	I	721920	0.221852	Slope	4.05719	0	NA	NA	NA	NA	NA	NA	NA	NA	NA
I_727377	I	727377	0.756135	Slope	4.05719	0	NA	NA	NA	NA	NA	NA	NA	NA	NA
I_730757	I	730757	0.7333	Slope	4.05719	0	NA	NA	NA	NA	NA	NA	NA	NA	NA
I_736799	I	736799	0.357504	Slope	4.05719	0	NA	NA	NA	NA	NA	NA	NA	NA	NA
I_736943	I	736943	0.640329	Slope	4.05719	0	NA	NA	NA	NA	NA	NA	NA	NA	NA
I_738683	I	738683	0.46877	Slope	4.05719	0	NA	NA	NA	NA	NA	NA	NA	NA	NA
I_739095	I	739095	0.0860675	Slope	4.05719	0	NA	NA	NA	NA	NA	NA	NA	NA	NA
I_740513	I	740513	0.370088	Slope	4.05719	0	NA	NA	NA	NA	NA	NA	NA	NA	NA
I_741614	I	741614	0.792956	Slope	4.05719	0	NA	NA	NA	NA	NA	NA	NA	NA	NA
I_744939	I	744939	0.7333	Slope	4.05719	0	NA	NA	NA	NA	NA	NA	NA	NA	NA
I_744951	I	744951	0.221852	Slope	4.05719	0	NA	NA	NA	NA	NA	NA	NA	NA	NA
I_755155	I	755155	0.357504	Slope	4.05719	0	NA	NA	NA	NA	NA	NA	NA	NA	NA
I_756171	I	756171	0.0242424	Slope	4.05719	0	NA	NA	NA	NA	NA	NA	NA	NA	NA
I_758594	I	758594	0.037377	Slope	4.05719	0	NA	NA	NA	NA	NA	NA	NA	NA	NA
I_758742	I	758742	0.895927	Slope	4.05719	0	NA	NA	NA	NA	NA	NA	NA	NA	NA
I_759719	I	759719	0.220034	Slope	4.05719	0	NA	NA	NA	NA	NA	NA	NA	NA	NA
I_761005	I	761005	0.640329	Slope	4.05719	0	NA	NA	NA	NA	NA	NA	NA	NA	NA
I_761505	I	761505	0.899923	Slope	4.05719	0	NA	NA	NA	NA	NA	NA	NA	NA	NA
I_762136	I	762136	0.0186431	Slope	4.05719	0	NA	NA	NA	NA	NA	NA	NA	NA	NA
I_765084	I	765084	0.370088	Slope	4.05719	0	NA	NA	NA	NA	NA	NA	NA	NA	NA
I_770653	I	770653	0.158151	Slope	4.05719	0	NA	NA	NA	NA	NA	NA	NA	NA	NA
I_771745	I	771745	0.281411	Slope	4.05719	0	NA	NA	NA	NA	NA	NA	NA	NA	NA
I_772388	I	772388	0.17026	Slope	4.05719	0	NA	NA	NA	NA	NA	NA	NA	NA	NA
I_775524	I	775524	3.97203e-05	Slope	4.05719	0	NA	NA	NA	NA	NA	NA	NA	NA	NA
I_776122	I	776122	0.0287658	Slope	4.05719	0	NA	NA	NA	NA	NA	NA	NA	NA	NA
I_777407	I	777407	0.0156544	Slope	4.05719	0	NA	NA	NA	NA	NA	NA	NA	NA	NA
I_779597	I	779597	0.7333	Slope	4.05719	0	NA	NA	NA	NA	NA	NA	NA	NA	NA
I_781111	I	781111	0.357504	Slope	4.05719	0	NA	NA	NA	NA	NA	NA	NA	NA	NA
I_781671	I	781671	0.0408648	Slope	4.05719	0	NA	NA	NA	NA	NA	NA	NA	NA	NA
I_786273	I	786273	0.640329	Slope	4.05719	0	NA	NA	NA	NA	NA	NA	NA	NA	NA
I_787613	I	787613	0.113727	Slope	4.05719	0	NA	NA	NA	NA	NA	NA	NA	NA	NA
I_788966	I	788966	0.370088	Slope	4.05719	0	NA	NA	NA	NA	NA	NA	NA	NA	NA
I_789639	I	789639	0.7333	Slope	4.05719	0	NA	NA	NA	NA	NA	NA	NA	NA	NA
I_792995	I	792995	0.357504	Slope	4.05719	0	NA	NA	NA	NA	NA	NA	NA	NA	NA
I_793480	I	793480	0.0156544	Slope	4.05719	0	NA	NA	NA	NA	NA	NA	NA	NA	NA
I_794211	I	794211	0.00786792	Slope	4.05719	0	NA	NA	NA	NA	NA	NA	NA	NA	NA
I_799041	I	799041	0.326116	Slope	4.05719	0	NA	NA	NA	NA	NA	NA	NA	NA	NA
I_804004	I	804004	0.370088	Slope	4.05719	0	NA	NA	NA	NA	NA	NA	NA	NA	NA
I_804241	I	804241	0.18453	Slope	4.05719	0	NA	NA	NA	NA	NA	NA	NA	NA	NA
I_805361	I	805361	0.0365891	Slope	4.05719	0	NA	NA	NA	NA	NA	NA	NA	NA	NA
I_807504	I	807504	1.02022	Slope	4.05719	0	NA	NA	NA	NA	NA	NA	NA	NA	NA
I_810217	I	810217	0.160798	Slope	4.05719	0	NA	NA	NA	NA	NA	NA	NA	NA	NA
I_811002	I	811002	0.895927	Slope	4.05719	0	NA	NA	NA	NA	NA	NA	NA	NA	NA
I_812066	I	812066	0.357504	Slope	4.05719	0	NA	NA	NA	NA	NA	NA	NA	NA	NA
I_814139	I	814139	0.0624334	Slope	4.05719	0	NA	NA	NA	NA	NA	NA	NA	NA	NA
I_822963	I	822963	0.295828	Slope	4.05719	0	NA	NA	NA	NA	NA	NA	NA	NA	NA
I_824619	I	824619	0.512013	Slope	4.05719	0	NA	NA	NA	NA	NA	NA	NA	NA	NA
I_826970	I	826970	0.627813	Slope	4.05719	0	NA	NA	NA	NA	NA	NA	NA	NA	NA
I_830484	I	830484	0.0564117	Slope	4.05719	0	NA	NA	NA	NA	NA	NA	NA	NA	NA
I_835999	I	835999	0.178845	Slope	4.05719	0	NA	NA	NA	NA	NA	NA	NA	NA	NA
I_837659	I	837659	0.254866	Slope	4.05719	0	NA	NA	NA	NA	NA	NA	NA	NA	NA
I_839222	I	839222	0.957494	Slope	4.05719	0	NA	NA	NA	NA	NA	NA	NA	NA	NA
I_839567	I	839567	0.357504	Slope	4.05719	0	NA	NA	NA	NA	NA	NA	NA	NA	NA
I_839931	I	839931	1.48231	Slope	4.05719	0	NA	NA	NA	NA	NA	NA	NA	NA	NA
I_846665	I	846665	0.412044	Slope	4.05719	0	NA	NA	NA	NA	NA	NA	NA	NA	NA
I_847650	I	847650	0.227728	Slope	4.05719	0	NA	NA	NA	NA	NA	NA	NA	NA	NA
I_848207	I	848207	0.412981	Slope	4.05719	0	NA	NA	NA	NA	NA	NA	NA	NA	NA
I_850499	I	850499	0.44368	Slope	4.05719	0	NA	NA	NA	NA	NA	NA	NA	NA	NA
I_850992	I	850992	0.640329	Slope	4.05719	0	NA	NA	NA	NA	NA	NA	NA	NA	NA
I_852228	I	852228	0.0901518	Slope	4.05719	0	NA	NA	NA	NA	NA	NA	NA	NA	NA
I_861672	I	861672	0.0428028	Slope	4.05719	0	NA	NA	NA	NA	NA	NA	NA	NA	NA
I_863741	I	863741	0.343462	Slope	4.05719	0	NA	NA	NA	NA	NA	NA	NA	NA	NA
I_876547	I	876547	0.345872	Slope	4.05719	0	NA	NA	NA	NA	NA	NA	NA	NA	NA
I_877144	I	877144	0.318908	Slope	4.05719	0	NA	NA	NA	NA	NA	NA	NA	NA	NA
I_877864	I	877864	0.206179	Slope	4.05719	0	NA	NA	NA	NA	NA	NA	NA	NA	NA
I_877962	I	877962	0.784656	Slope	4.05719	0	NA	NA	NA	NA	NA	NA	NA	NA	NA
I_880114	I	880114	0.0903527	Slope	4.05719	0	NA	NA	NA	NA	NA	NA	NA	NA	NA
I_880852	I	880852	0.397293	Slope	4.05719	0	NA	NA	NA	NA	NA	NA	NA	NA	NA
I_883079	I	883079	0.400504	Slope	4.05719	0	NA	NA	NA	NA	NA	NA	NA	NA	NA
I_884389	I	884389	0.0273651	Slope	4.05719	0	NA	NA	NA	NA	NA	NA	NA	NA	NA
I_886974	I	886974	0.0577144	Slope	4.05719	0	NA	NA	NA	NA	NA	NA	NA	NA	NA
I_888488	I	888488	0.629322	Slope	4.05719	0	NA	NA	NA	NA	NA	NA	NA	NA	NA
I_895059	I	895059	0.196146	Slope	4.05719	0	NA	NA	NA	NA	NA	NA	NA	NA	NA
I_912022	I	912022	0.625813	Slope	4.05719	0	NA	NA	NA	NA	NA	NA	NA	NA	NA
I_912890	I	912890	0.208267	Slope	4.05719	0	NA	NA	NA	NA	NA	NA	NA	NA	NA
I_913928	I	913928	0.611775	Slope	4.05719	0	NA	NA	NA	NA	NA	NA	NA	NA	NA
I_916826	I	916826	0.0174841	Slope	4.05719	0	NA	NA	NA	NA	NA	NA	NA	NA	NA
I_919967	I	919967	0.260103	Slope	4.05719	0	NA	NA	NA	NA	NA	NA	NA	NA	NA
I_921703	I	921703	0.45314	Slope	4.05719	0	NA	NA	NA	NA	NA	NA	NA	NA	NA
I_922115	I	922115	0.222357	Slope	4.05719	0	NA	NA	NA	NA	NA	NA	NA	NA	NA
I_927179	I	927179	0.081965	Slope	4.05719	0	NA	NA	NA	NA	NA	NA	NA	NA	NA
I_928600	I	928600	0.105045	Slope	4.05719	0	NA	NA	NA	NA	NA	NA	NA	NA	NA
I_935051	I	935051	0.153998	Slope	4.05719	0	NA	NA	NA	NA	NA	NA	NA	NA	NA
I_935443	I	935443	0.111217	Slope	4.05719	0	NA	NA	NA	NA	NA	NA	NA	NA	NA
I_937541	I	937541	0.0535065	Slope	4.05719	0	NA	NA	NA	NA	NA	NA	NA	NA	NA
I_944827	I	944827	0.00926994	Slope	4.05719	0	NA	NA	NA	NA	NA	NA	NA	NA	NA
I_946888	I	946888	0.0273651	Slope	4.05719	0	NA	NA	NA	NA	NA	NA	NA	NA	NA
I_947546	I	947546	0.950416	Slope	4.05719	0	NA	NA	NA	NA	NA	NA	NA	NA	NA
I_948048	I	948048	0.318908	Slope	4.05719	0	NA	NA	NA	NA	NA	NA	NA	NA	NA
I_948941	I	948941	0.370756	Slope	4.05719	0	NA	NA	NA	NA	NA	NA	NA	NA	NA
I_949953	I	949953	0.596464	Slope	4.05719	0	NA	NA	NA	NA	NA	NA	NA	NA	NA
I_950813	I	950813	0.420279	Slope	4.05719	0	NA	NA	NA	NA	NA	NA	NA	NA	NA
I_951158	I	951158	0.290839	Slope	4.05719	0	NA	NA	NA	NA	NA	NA	NA	NA	NA
I_951190	I	951190	0.625581	Slope	4.05719	0	NA	NA	NA	NA	NA	NA	NA	NA	NA
I_952797	I	952797	0.131175	Slope	4.05719	0	NA	NA	NA	NA	NA	NA	NA	NA	NA
I_956650	I	956650	0.324424	Slope	4.05719	0	NA	NA	NA	NA	NA	NA	NA	NA	NA
I_960324	I	960324	0.129229	Slope	4.05719	0	NA	NA	NA	NA	NA	NA	NA	NA	NA
I_960976	I	960976	0.314889	Slope	4.05719	0	NA	NA	NA	NA	NA	NA	NA	NA	NA
I_963310	I	963310	0.0863182	Slope	4.05719	0	NA	NA	NA	NA	NA	NA	NA	NA	NA
I_966291	I	966291	0.240569	Slope	4.05719	0	NA	NA	NA	NA	NA	NA	NA	NA	NA
I_969001	I	969001	0.0493009	Slope	4.05719	0	NA	NA	NA	NA	NA	NA	NA	NA	NA
I_970355	I	970355	0.650281	Slope	4.05719	0	NA	NA	NA	NA	NA	NA	NA	NA	NA
I_973119	I	973119	0.302099	Slope	4.05719	0	NA	NA	NA	NA	NA	NA	NA	NA	NA
I_973423	I	973423	0.205845	Slope	4.05719	0	NA	NA	NA	NA	NA	NA	NA	NA	NA
I_974917	I	974917	0.00956172	Slope	4.05719	0	NA	NA	NA	NA	NA	NA	NA	NA	NA
I_975649	I	975649	0.0653193	Slope	4.05719	0	NA	NA	NA	NA	NA	NA	NA	NA	NA
I_978053	I	978053	0.0273651	Slope	4.05719	0	NA	NA	NA	NA	NA	NA	NA	NA	NA
I_978936	I	978936	0.528532	Slope	4.05719	0	NA	NA	NA	NA	NA	NA	NA	NA	NA
I_979072	I	979072	0.160798	Slope	4.05719	0	NA	NA	NA	NA	NA	NA	NA	NA	NA
I_981568	I	981568	0.474493	Slope	4.05719	0	NA	NA	NA	NA	NA	NA	NA	NA	NA
I_981869	I	981869	0.09566	Slope	4.05719	0	NA	NA	NA	NA	NA	NA	NA	NA	NA
I_982821	I	982821	0.238237	Slope	4.05719	0	NA	NA	NA	NA	NA	NA	NA	NA	NA
I_984961	I	984961	0.101835	Slope	4.05719	0	NA	NA	NA	NA	NA	NA	NA	NA	NA
I_986279	I	986279	0.0370566	Slope	4.05719	0	NA	NA	NA	NA	NA	NA	NA	NA	NA
I_987047	I	987047	0.00926994	Slope	4.05719	0	NA	NA	NA	NA	NA	NA	NA	NA	NA
I_988411	I	988411	0.222937	Slope	4.05719	0	NA	NA	NA	NA	NA	NA	NA	NA	NA
I_989221	I	989221	0.627885	Slope	4.05719	0	NA	NA	NA	NA	NA	NA	NA	NA	NA
I_989350	I	989350	0.0273651	Slope	4.05719	0	NA	NA	NA	NA	NA	NA	NA	NA	NA
I_990149	I	990149	0.080615	Slope	4.05719	0	NA	NA	NA	NA	NA	NA	NA	NA	NA
I_990428	I	990428	0.313788	Slope	4.05719	0	NA	NA	NA	NA	NA	NA	NA	NA	NA
I_992266	I	992266	0.211639	Slope	4.05719	0	NA	NA	NA	NA	NA	NA	NA	NA	NA
I_992525	I	992525	0.150359	Slope	4.05719	0	NA	NA	NA	NA	NA	NA	NA	NA	NA
I_993217	I	993217	0.171447	Slope	4.05719	0	NA	NA	NA	NA	NA	NA	NA	NA	NA
I_993558	I	993558	0.09566	Slope	4.05719	0	NA	NA	NA	NA	NA	NA	NA	NA	NA
I_993801	I	993801	0.697823	Slope	4.05719	0	NA	NA	NA	NA	NA	NA	NA	NA	NA
I_995078	I	995078	0.543028	Slope	4.05719	0	NA	NA	NA	NA	NA	NA	NA	NA	NA
I_995246	I	995246	0.474493	Slope	4.05719	0	NA	NA	NA	NA	NA	NA	NA	NA	NA
I_997636	I	997636	0.0334175	Slope	4.05719	0	NA	NA	NA	NA	NA	NA	NA	NA	NA
I_999180	I	999180	0.275268	Slope	4.05719	0	NA	NA	NA	NA	NA	NA	NA	NA	NA
I_999709	I	999709	0.160798	Slope	4.05719	0	NA	NA	NA	NA	NA	NA	NA	NA	NA
I_999997	I	999997	0.213829	Slope	4.05719	0	NA	NA	NA	NA	NA	NA	NA	NA	NA
I_1003648	I	1003648	0.171447	Slope	4.05719	0	NA	NA	NA	NA	NA	NA	NA	NA	NA
I_1009750	I	1009750	0.0133312	Slope	4.05719	0	NA	NA	NA	NA	NA	NA	NA	NA	NA
I_1010086	I	1010086	0.245021	Slope	4.05719	0	NA	NA	NA	NA	NA	NA	NA	NA	NA
I_1011098	I	1011098	0.0273651	Slope	4.05719	0	NA	NA	NA	NA	NA	NA	NA	NA	NA
I_1011169	I	1011169	0.313788	Slope	4.05719	0	NA	NA	NA	NA	NA	NA	NA	NA	NA
I_1011734	I	1011734	0.00710087	Slope	4.05719	0	NA	NA	NA	NA	NA	NA	NA	NA	NA
I_1013732	I	1013732	0.0223623	Slope	4.05719	0	NA	NA	NA	NA	NA	NA	NA	NA	NA
I_1015443	I	1015443	0.0971792	Slope	4.05719	0	NA	NA	NA	NA	NA	NA	NA	NA	NA
I_1015933	I	1015933	0.46748	Slope	4.05719	0	NA	NA	NA	NA	NA	NA	NA	NA	NA
I_1016104	I	1016104	0.474493	Slope	4.05719	0	NA	NA	NA	NA	NA	NA	NA	NA	NA
I_1024526	I	1024526	0.606963	Slope	4.05719	0	NA	NA	NA	NA	NA	NA	NA	NA	NA
I_1029658	I	1029658	0.90064	Slope	4.05719	0	NA	NA	NA	NA	NA	NA	NA	NA	NA
I_1030895	I	1030895	0.310912	Slope	4.05719	0	NA	NA	NA	NA	NA	NA	NA	NA	NA
I_1031227	I	1031227	0.393468	Slope	4.05719	0	NA	NA	NA	NA	NA	NA	NA	NA	NA
I_1032796	I	1032796	0.448989	Slope	4.05719	0	NA	NA	NA	NA	NA	NA	NA	NA	NA
I_1033250	I	1033250	0.570485	Slope	4.05719	0	NA	NA	NA	NA	NA	NA	NA	NA	NA
I_1034314	I	1034314	0.0925443	Slope	4.05719	0	NA	NA	NA	NA	NA	NA	NA	NA	NA
I_1034769	I	1034769	0.0223623	Slope	4.05719	0	NA	NA	NA	NA	NA	NA	NA	NA	NA
I_1038911	I	1038911	0.405432	Slope	4.05719	0	NA	NA	NA	NA	NA	NA	NA	NA	NA
I_1039472	I	1039472	0.320687	Slope	4.05719	0	NA	NA	NA	NA	NA	NA	NA	NA	NA
I_1041802	I	1041802	0.0620106	Slope	4.05719	0	NA	NA	NA	NA	NA	NA	NA	NA	NA
I_1043712	I	1043712	0.370088	Slope	4.05719	0	NA	NA	NA	NA	NA	NA	NA	NA	NA
I_1050147	I	1050147	0.474493	Slope	4.05719	0	NA	NA	NA	NA	NA	NA	NA	NA	NA
I_1050613	I	1050613	0.588569	Slope	4.05719	0	NA	NA	NA	NA	NA	NA	NA	NA	NA
I_1050624	I	1050624	0.429466	Slope	4.05719	0	NA	NA	NA	NA	NA	NA	NA	NA	NA
I_1052566	I	1052566	1.32242	Slope	4.05719	0	NA	NA	NA	NA	NA	NA	NA	NA	NA
I_1053646	I	1053646	2.04821	Slope	4.05719	0	NA	NA	NA	NA	NA	NA	NA	NA	NA
I_1054275	I	1054275	0.249773	Slope	4.05719	0	NA	NA	NA	NA	NA	NA	NA	NA	NA
I_1058900	I	1058900	1.07072	Slope	4.05719	0	NA	NA	NA	NA	NA	NA	NA	NA	NA
I_1059258	I	1059258	0.151688	Slope	4.05719	0	NA	NA	NA	NA	NA	NA	NA	NA	NA
I_1059264	I	1059264	0.057436	Slope	4.05719	0	NA	NA	NA	NA	NA	NA	NA	NA	NA
I_1059600	I	1059600	0.233848	Slope	4.05719	0	NA	NA	NA	NA	NA	NA	NA	NA	NA
I_1062436	I	1062436	0.76086	Slope	4.05719	0	NA	NA	NA	NA	NA	NA	NA	NA	NA
I_1062730	I	1062730	0.195648	Slope	4.05719	0	NA	NA	NA	NA	NA	NA	NA	NA	NA
I_1064437	I	1064437	1.50822	Slope	4.05719	0	NA	NA	NA	NA	NA	NA	NA	NA	NA
I_1064448	I	1064448	0.92413	Slope	4.05719	0	NA	NA	NA	NA	NA	NA	NA	NA	NA
I_1064922	I	1064922	0.757473	Slope	4.05719	0	NA	NA	NA	NA	NA	NA	NA	NA	NA
I_1066614	I	1066614	0.0223623	Slope	4.05719	0	NA	NA	NA	NA	NA	NA	NA	NA	NA
I_1068572	I	1068572	0.268716	Slope	4.05719	0	NA	NA	NA	NA	NA	NA	NA	NA	NA
I_1069226	I	1069226	0.337064	Slope	4.05719	0	NA	NA	NA	NA	NA	NA	NA	NA	NA
I_1071327	I	1071327	0.941008	Slope	4.05719	0	NA	NA	NA	NA	NA	NA	NA	NA	NA
I_1071437	I	1071437	0.160799	Slope	4.05719	0	NA	NA	NA	NA	NA	NA	NA	NA	NA
I_1072123	I	1072123	0.528396	Slope	4.05719	0	NA	NA	NA	NA	NA	NA	NA	NA	NA
I_1073789	I	1073789	0.578004	Slope	4.05719	0	NA	NA	NA	NA	NA	NA	NA	NA	NA
I_1073820	I	1073820	0.125396	Slope	4.05719	0	NA	NA	NA	NA	NA	NA	NA	NA	NA
I_1074459	I	1074459	0.76086	Slope	4.05719	0	NA	NA	NA	NA	NA	NA	NA	NA	NA
I_1086290	I	1086290	1.29667	Slope	4.05719	0	NA	NA	NA	NA	NA	NA	NA	NA	NA
I_1086755	I	1086755	0.0446831	Slope	4.05719	0	NA	NA	NA	NA	NA	NA	NA	NA	NA
I_1086960	I	1086960	1.50822	Slope	4.05719	0	NA	NA	NA	NA	NA	NA	NA	NA	NA
I_1088775	I	1088775	0.307605	Slope	4.05719	0	NA	NA	NA	NA	NA	NA	NA	NA	NA
I_1089080	I	1089080	0.352702	Slope	4.05719	0	NA	NA	NA	NA	NA	NA	NA	NA	NA
I_1089763	I	1089763	0.303194	Slope	4.05719	0	NA	NA	NA	NA	NA	NA	NA	NA	NA
I_1090252	I	1090252	0.412596	Slope	4.05719	0	NA	NA	NA	NA	NA	NA	NA	NA	NA
I_1091251	I	1091251	0.268716	Slope	4.05719	0	NA	NA	NA	NA	NA	NA	NA	NA	NA
I_1096611	I	1096611	0.153849	Slope	4.05719	0	NA	NA	NA	NA	NA	NA	NA	NA	NA
I_1099042	I	1099042	0.282375	Slope	4.05719	0	NA	NA	NA	NA	NA	NA	NA	NA	NA
I_1099355	I	1099355	0.142793	Slope	4.05719	0	NA	NA	NA	NA	NA	NA	NA	NA	NA
I_1099520	I	1099520	0.420279	Slope	4.05719	0	NA	NA	NA	NA	NA	NA	NA	NA	NA
I_1099714	I	1099714	0.0258603	Slope	4.05719	0	NA	NA	NA	NA	NA	NA	NA	NA	NA
I_1101583	I	1101583	0.723565	Slope	4.05719	0	NA	NA	NA	NA	NA	NA	NA	NA	NA
I_1103626	I	1103626	0.321407	Slope	4.05719	0	NA	NA	NA	NA	NA	NA	NA	NA	NA
I_1104819	I	1104819	0.76086	Slope	4.05719	0	NA	NA	NA	NA	NA	NA	NA	NA	NA
I_1105334	I	1105334	0.014572	Slope	4.05719	0	NA	NA	NA	NA	NA	NA	NA	NA	NA
I_1106869	I	1106869	0.0681105	Slope	4.05719	0	NA	NA	NA	NA	NA	NA	NA	NA	NA
I_1109795	I	1109795	0.338284	Slope	4.05719	0	NA	NA	NA	NA	NA	NA	NA	NA	NA
I_1109928	I	1109928	0.108222	Slope	4.05719	0	NA	NA	NA	NA	NA	NA	NA	NA	NA
I_1109958	I	1109958	0.0485038	Slope	4.05719	0	NA	NA	NA	NA	NA	NA	NA	NA	NA
I_1110833	I	1110833	0.369239	Slope	4.05719	0	NA	NA	NA	NA	NA	NA	NA	NA	NA
I_1112137	I	1112137	0.76086	Slope	4.05719	0	NA	NA	NA	NA	NA	NA	NA	NA	NA
I_1116323	I	1116323	0.338249	Slope	4.05719	0	NA	NA	NA	NA	NA	NA	NA	NA	NA
I_1116425	I	1116425	0.321407	Slope	4.05719	0	NA	NA	NA	NA	NA	NA	NA	NA	NA
I_1116473	I	1116473	0.0714735	Slope	4.05719	0	NA	NA	NA	NA	NA	NA	NA	NA	NA
I_1126255	I	1126255	0.365777	Slope	4.05719	0	NA	NA	NA	NA	NA	NA	NA	NA	NA
I_1128769	I	1128769	0.0522151	Slope	4.05719	0	NA	NA	NA	NA	NA	NA	NA	NA	NA
I_1128847	I	1128847	0.119392	Slope	4.05719	0	NA	NA	NA	NA	NA	NA	NA	NA	NA
I_1128850	I	1128850	0.112627	Slope	4.05719	0	NA	NA	NA	NA	NA	NA	NA	NA	NA
I_1128934	I	1128934	1.04254	Slope	4.05719	0	NA	NA	NA	NA	NA	NA	NA	NA	NA
I_1129124	I	1129124	0.76086	Slope	4.05719	0	NA	NA	NA	NA	NA	NA	NA	NA	NA
I_1129483	I	1129483	0.222499	Slope	4.05719	0	NA	NA	NA	NA	NA	NA	NA	NA	NA
I_1129606	I	1129606	0.514329	Slope	4.05719	0	NA	NA	NA	NA	NA	NA	NA	NA	NA
I_1130709	I	1130709	0.00379898	Slope	4.05719	0	NA	NA	NA	NA	NA	NA	NA	NA	NA
I_1131409	I	1131409	0.561668	Slope	4.05719	0	NA	NA	NA	NA	NA	NA	NA	NA	NA
I_1132440	I	1132440	0.0890924	Slope	4.05719	0	NA	NA	NA	NA	NA	NA	NA	NA	NA
I_1135670	I	1135670	0.434369	Slope	4.05719	0	NA	NA	NA	NA	NA	NA	NA	NA	NA
I_1137830	I	1137830	1.54034	Slope	4.05719	0	NA	NA	NA	NA	NA	NA	NA	NA	NA
I_1137920	I	1137920	1.19348	Slope	4.05719	0	NA	NA	NA	NA	NA	NA	NA	NA	NA
I_1138018	I	1138018	0.305847	Slope	4.05719	0	NA	NA	NA	NA	NA	NA	NA	NA	NA
I_1138155	I	1138155	0.0529742	Slope	4.05719	0	NA	NA	NA	NA	NA	NA	NA	NA	NA
I_1139786	I	1139786	0.0913839	Slope	4.05719	0	NA	NA	NA	NA	NA	NA	NA	NA	NA
I_1139937	I	1139937	0.0522151	Slope	4.05719	0	NA	NA	NA	NA	NA	NA	NA	NA	NA
I_1139949	I	1139949	0.310175	Slope	4.05719	0	NA	NA	NA	NA	NA	NA	NA	NA	NA
I_1139951	I	1139951	0.445344	Slope	4.05719	0	NA	NA	NA	NA	NA	NA	NA	NA	NA
I_1140126	I	1140126	0.0295271	Slope	4.05719	0	NA	NA	NA	NA	NA	NA	NA	NA	NA
I_1140583	I	1140583	0.0117163	Slope	4.05719	0	NA	NA	NA	NA	NA	NA	NA	NA	NA
I_1140712	I	1140712	0.119392	Slope	4.05719	0	NA	NA	NA	NA	NA	NA	NA	NA	NA
I_1140724	I	1140724	0.0124019	Slope	4.05719	0	NA	NA	NA	NA	NA	NA	NA	NA	NA
I_1140819	I	1140819	0.331268	Slope	4.05719	0	NA	NA	NA	NA	NA	NA	NA	NA	NA
I_1141158	I	1141158	0.434024	Slope	4.05719	0	NA	NA	NA	NA	NA	NA	NA	NA	NA
I_1141367	I	1141367	0.0927651	Slope	4.05719	0	NA	NA	NA	NA	NA	NA	NA	NA	NA
I_1142129	I	1142129	0.0731951	Slope	4.05719	0	NA	NA	NA	NA	NA	NA	NA	NA	NA
I_1146833	I	1146833	0.380356	Slope	4.05719	0	NA	NA	NA	NA	NA	NA	NA	NA	NA
I_1148193	I	1148193	0.122241	Slope	4.05719	0	NA	NA	NA	NA	NA	NA	NA	NA	NA
I_1149835	I	1149835	0.248872	Slope	4.05719	0	NA	NA	NA	NA	NA	NA	NA	NA	NA
I_1149912	I	1149912	0.249103	Slope	4.05719	0	NA	NA	NA	NA	NA	NA	NA	NA	NA
I_1154232	I	1154232	0.177124	Slope	4.05719	0	NA	NA	NA	NA	NA	NA	NA	NA	NA
I_1154971	I	1154971	0.100164	Slope	4.05719	0	NA	NA	NA	NA	NA	NA	NA	NA	NA
I_1155325	I	1155325	0.299935	Slope	4.05719	0	NA	NA	NA	NA	NA	NA	NA	NA	NA
I_1156492	I	1156492	0.0522151	Slope	4.05719	0	NA	NA	NA	NA	NA	NA	NA	NA	NA
I_1156845	I	1156845	0.434024	Slope	4.05719	0	NA	NA	NA	NA	NA	NA	NA	NA	NA
I_1157254	I	1157254	0.602499	Slope	4.05719	0	NA	NA	NA	NA	NA	NA	NA	NA	NA
I_1159684	I	1159684	0.141299	Slope	4.05719	0	NA	NA	NA	NA	NA	NA	NA	NA	NA
I_1161993	I	1161993	0.790175	Slope	4.05719	0	NA	NA	NA	NA	NA	NA	NA	NA	NA
I_1165498	I	1165498	0.832397	Slope	4.05719	0	NA	NA	NA	NA	NA	NA	NA	NA	NA
I_1165831	I	1165831	0.946682	Slope	4.05719	0	NA	NA	NA	NA	NA	NA	NA	NA	NA
I_1166098	I	1166098	0.217321	Slope	4.05719	0	NA	NA	NA	NA	NA	NA	NA	NA	NA
I_1166270	I	1166270	1.36566	Slope	4.05719	0	NA	NA	NA	NA	NA	NA	NA	NA	NA
I_1166365	I	1166365	0.0822452	Slope	4.05719	0	NA	NA	NA	NA	NA	NA	NA	NA	NA
I_1169002	I	1169002	0.0906186	Slope	4.05719	0	NA	NA	NA	NA	NA	NA	NA	NA	NA
I_1169040	I	1169040	0.676308	Slope	4.05719	0	NA	NA	NA	NA	NA	NA	NA	NA	NA
I_1175600	I	1175600	0.178845	Slope	4.05719	0	NA	NA	NA	NA	NA	NA	NA	NA	NA
I_1176473	I	1176473	0.0522151	Slope	4.05719	0	NA	NA	NA	NA	NA	NA	NA	NA	NA
I_1178087	I	1178087	0.19929	Slope	4.05719	0	NA	NA	NA	NA	NA	NA	NA	NA	NA
I_1178132	I	1178132	0.170238	Slope	4.05719	0	NA	NA	NA	NA	NA	NA	NA	NA	NA
I_1178358	I	1178358	0.35009	Slope	4.05719	0	NA	NA	NA	NA	NA	NA	NA	NA	NA
I_1179424	I	1179424	0.132563	Slope	4.05719	0	NA	NA	NA	NA	NA	NA	NA	NA	NA
I_1180974	I	1180974	0.199106	Slope	4.05719	0	NA	NA	NA	NA	NA	NA	NA	NA	NA
I_1181220	I	1181220	0.285575	Slope	4.05719	0	NA	NA	NA	NA	NA	NA	NA	NA	NA
I_1182911	I	1182911	0.632813	Slope	4.05719	0	NA	NA	NA	NA	NA	NA	NA	NA	NA
I_1184704	I	1184704	0.038021	Slope	4.05719	0	NA	NA	NA	NA	NA	NA	NA	NA	NA
I_1184847	I	1184847	0.256523	Slope	4.05719	0	NA	NA	NA	NA	NA	NA	NA	NA	NA
I_1185263	I	1185263	0.715858	Slope	4.05719	0	NA	NA	NA	NA	NA	NA	NA	NA	NA
I_1185646	I	1185646	1.06466	Slope	4.05719	0	NA	NA	NA	NA	NA	NA	NA	NA	NA
I_1185697	I	1185697	0.0898712	Slope	4.05719	0	NA	NA	NA	NA	NA	NA	NA	NA	NA
I_1189370	I	1189370	0.711914	Slope	4.05719	0	NA	NA	NA	NA	NA	NA	NA	NA	NA
I_1198493	I	1198493	0.00300256	Slope	4.05719	0	NA	NA	NA	NA	NA	NA	NA	NA	NA
I_1198656	I	1198656	0.216156	Slope	4.05719	0	NA	NA	NA	NA	NA	NA	NA	NA	NA
I_1199049	I	1199049	0.0220263	Slope	4.05719	0	NA	NA	NA	NA	NA	NA	NA	NA	NA
I_1199350	I	1199350	0.530938	Slope	4.05719	0	NA	NA	NA	NA	NA	NA	NA	NA	NA
I_1199489	I	1199489	0.0508268	Slope	4.05719	0	NA	NA	NA	NA	NA	NA	NA	NA	NA
I_1200105	I	1200105	1.22521	Slope	4.05719	0	NA	NA	NA	NA	NA	NA	NA	NA	NA
I_1200256	I	1200256	0.162182	Slope	4.05719	0	NA	NA	NA	NA	NA	NA	NA	NA	NA
I_1200305	I	1200305	2.24292	Slope	4.05719	0	NA	NA	NA	NA	NA	NA	NA	NA	NA
I_1200509	I	1200509	0.157248	Slope	4.05719	0	NA	NA	NA	NA	NA	NA	NA	NA	NA
I_1210926	I	1210926	0.0641127	Slope	4.05719	0	NA	NA	NA	NA	NA	NA	NA	NA	NA
I_1211149	I	1211149	0.429809	Slope	4.05719	0	NA	NA	NA	NA	NA	NA	NA	NA	NA
I_1211278	I	1211278	0.211684	Slope	4.05719	0	NA	NA	NA	NA	NA	NA	NA	NA	NA
I_1211383	I	1211383	0.735206	Slope	4.05719	0	NA	NA	NA	NA	NA	NA	NA	NA	NA
I_1212674	I	1212674	0.123214	Slope	4.05719	0	NA	NA	NA	NA	NA	NA	NA	NA	NA
I_1218700	I	1218700	0.369239	Slope	4.05719	0	NA	NA	NA	NA	NA	NA	NA	NA	NA
I_1218959	I	1218959	1.07291	Slope	4.05719	0	NA	NA	NA	NA	NA	NA	NA	NA	NA
I_1219399	I	1219399	0.566422	Slope	4.05719	0	NA	NA	NA	NA	NA	NA	NA	NA	NA
I_1221084	I	1221084	0.184292	Slope	4.05719	0	NA	NA	NA	NA	NA	NA	NA	NA	NA
I_1221128	I	1221128	0.196974	Slope	4.05719	0	NA	NA	NA	NA	NA	NA	NA	NA	NA
I_1222574	I	1222574	0.137674	Slope	4.05719	0	NA	NA	NA	NA	NA	NA	NA	NA	NA
I_1224025	I	1224025	0.406467	Slope	4.05719	0	NA	NA	NA	NA	NA	NA	NA	NA	NA
I_1224377	I	1224377	0.288795	Slope	4.05719	0	NA	NA	NA	NA	NA	NA	NA	NA	NA
I_1224387	I	1224387	0.187575	Slope	4.05719	0	NA	NA	NA	NA	NA	NA	NA	NA	NA
I_1226107	I	1226107	0.0472331	Slope	4.05719	0	NA	NA	NA	NA	NA	NA	NA	NA	NA
I_1226928	I	1226928	0.0149015	Slope	4.05719	0	NA	NA	NA	NA	NA	NA	NA	NA	NA
I_1228585	I	1228585	0.140579	Slope	4.05719	0	NA	NA	NA	NA	NA	NA	NA	NA	NA
I_1228789	I	1228789	0.00303424	Slope	4.05719	0	NA	NA	NA	NA	NA	NA	NA	NA	NA
I_1229336	I	1229336	0.644713	Slope	4.05719	0	NA	NA	NA	NA	NA	NA	NA	NA	NA
I_1229366	I	1229366	0.141409	Slope	4.05719	0	NA	NA	NA	NA	NA	NA	NA	NA	NA
I_1232339	I	1232339	0.00879194	Slope	4.05719	0	NA	NA	NA	NA	NA	NA	NA	NA	NA
I_1233185	I	1233185	0.419945	Slope	4.05719	0	NA	NA	NA	NA	NA	NA	NA	NA	NA
I_1233542	I	1233542	0.0468223	Slope	4.05719	0	NA	NA	NA	NA	NA	NA	NA	NA	NA
I_1233659	I	1233659	0.0176268	Slope	4.05719	0	NA	NA	NA	NA	NA	NA	NA	NA	NA
I_1234427	I	1234427	0.555426	Slope	4.05719	0	NA	NA	NA	NA	NA	NA	NA	NA	NA
I_1234526	I	1234526	0.6791	Slope	4.05719	0	NA	NA	NA	NA	NA	NA	NA	NA	NA
I_1234623	I	1234623	0.113105	Slope	4.05719	0	NA	NA	NA	NA	NA	NA	NA	NA	NA
I_1235061	I	1235061	0.175885	Slope	4.05719	0	NA	NA	NA	NA	NA	NA	NA	NA	NA
I_1235189	I	1235189	0.027281	Slope	4.05719	0	NA	NA	NA	NA	NA	NA	NA	NA	NA
I_1235904	I	1235904	0.194699	Slope	4.05719	0	NA	NA	NA	NA	NA	NA	NA	NA	NA
I_1235922	I	1235922	0.0748294	Slope	4.05719	0	NA	NA	NA	NA	NA	NA	NA	NA	NA
I_1236354	I	1236354	0.133015	Slope	4.05719	0	NA	NA	NA	NA	NA	NA	NA	NA	NA
I_1241261	I	1241261	0.0108589	Slope	4.05719	0	NA	NA	NA	NA	NA	NA	NA	NA	NA
I_1242025	I	1242025	0.686344	Slope	4.05719	0	NA	NA	NA	NA	NA	NA	NA	NA	NA
I_1242218	I	1242218	0.165551	Slope	4.05719	0	NA	NA	NA	NA	NA	NA	NA	NA	NA
I_1243506	I	1243506	0.711067	Slope	4.05719	0	NA	NA	NA	NA	NA	NA	NA	NA	NA
I_1248064	I	1248064	1.5638	Slope	4.05719	0	NA	NA	NA	NA	NA	NA	NA	NA	NA
I_1248624	I	1248624	1.20904	Slope	4.05719	0	NA	NA	NA	NA	NA	NA	NA	NA	NA
I_1248756	I	1248756	0.164922	Slope	4.05719	0	NA	NA	NA	NA	NA	NA	NA	NA	NA
I_1251884	I	1251884	0.689706	Slope	4.05719	0	NA	NA	NA	NA	NA	NA	NA	NA	NA
I_1253383	I	1253383	0.200693	Slope	4.05719	0	NA	NA	NA	NA	NA	NA	NA	NA	NA
I_1253651	I	1253651	1.31577	Slope	4.05719	0	NA	NA	NA	NA	NA	NA	NA	NA	NA
I_1253769	I	1253769	0.0113395	Slope	4.05719	0	NA	NA	NA	NA	NA	NA	NA	NA	NA
I_1254508	I	1254508	0.900963	Slope	4.05719	0	NA	NA	NA	NA	NA	NA	NA	NA	NA
I_1255351	I	1255351	0.0108589	Slope	4.05719	0	NA	NA	NA	NA	NA	NA	NA	NA	NA
I_1255416	I	1255416	0.638673	Slope	4.05719	0	NA	NA	NA	NA	NA	NA	NA	NA	NA
I_1255890	I	1255890	0.239382	Slope	4.05719	0	NA	NA	NA	NA	NA	NA	NA	NA	NA
I_1256304	I	1256304	0.686344	Slope	4.05719	0	NA	NA	NA	NA	NA	NA	NA	NA	NA
I_1256309	I	1256309	0.281092	Slope	4.05719	0	NA	NA	NA	NA	NA	NA	NA	NA	NA
I_1258563	I	1258563	0.165192	Slope	4.05719	0	NA	NA	NA	NA	NA	NA	NA	NA	NA
I_1258706	I	1258706	0.558624	Slope	4.05719	0	NA	NA	NA	NA	NA	NA	NA	NA	NA
I_1259971	I	1259971	0.368531	Slope	4.05719	0	NA	NA	NA	NA	NA	NA	NA	NA	NA
I_1259986	I	1259986	0.911301	Slope	4.05719	0	NA	NA	NA	NA	NA	NA	NA	NA	NA
I_1260215	I	1260215	0.348771	Slope	4.05719	0	NA	NA	NA	NA	NA	NA	NA	NA	NA
I_1260822	I	1260822	0.434024	Slope	4.05719	0	NA	NA	NA	NA	NA	NA	NA	NA	NA
I_1261505	I	1261505	0.0901518	Slope	4.05719	0	NA	NA	NA	NA	NA	NA	NA	NA	NA
I_1263341	I	1263341	0.830059	Slope	4.05719	0	NA	NA	NA	NA	NA	NA	NA	NA	NA
I_1266023	I	1266023	0.188689	Slope	4.05719	0	NA	NA	NA	NA	NA	NA	NA	NA	NA
I_1266360	I	1266360	0.0108589	Slope	4.05719	0	NA	NA	NA	NA	NA	NA	NA	NA	NA
I_1266499	I	1266499	0.686344	Slope	4.05719	0	NA	NA	NA	NA	NA	NA	NA	NA	NA
I_1267409	I	1267409	0.221103	Slope	4.05719	0	NA	NA	NA	NA	NA	NA	NA	NA	NA
I_1267574	I	1267574	0.911301	Slope	4.05719	0	NA	NA	NA	NA	NA	NA	NA	NA	NA
I_1269245	I	1269245	0.550767	Slope	4.05719	0	NA	NA	NA	NA	NA	NA	NA	NA	NA
I_1269253	I	1269253	0.254029	Slope	4.05719	0	NA	NA	NA	NA	NA	NA	NA	NA	NA
I_1269603	I	1269603	0.0715698	Slope	4.05719	0	NA	NA	NA	NA	NA	NA	NA	NA	NA
I_1269787	I	1269787	0.900739	Slope	4.05719	0	NA	NA	NA	NA	NA	NA	NA	NA	NA
I_1269893	I	1269893	0.373488	Slope	4.05719	0	NA	NA	NA	NA	NA	NA	NA	NA	NA
I_1277122	I	1277122	0.708561	Slope	4.05719	0	NA	NA	NA	NA	NA	NA	NA	NA	NA
I_1279253	I	1279253	0.686344	Slope	4.05719	0	NA	NA	NA	NA	NA	NA	NA	NA	NA
I_1281806	I	1281806	0.194699	Slope	4.05719	0	NA	NA	NA	NA	NA	NA	NA	NA	NA
I_1285276	I	1285276	0.580112	Slope	4.05719	0	NA	NA	NA	NA	NA	NA	NA	NA	NA
I_1287631	I	1287631	0.254029	Slope	4.05719	0	NA	NA	NA	NA	NA	NA	NA	NA	NA
I_1292489	I	1292489	0.494823	Slope	4.05719	0	NA	NA	NA	NA	NA	NA	NA	NA	NA
I_1294134	I	1294134	0.0108589	Slope	4.05719	0	NA	NA	NA	NA	NA	NA	NA	NA	NA
I_1302732	I	1302732	0.764378	Slope	4.05719	0	NA	NA	NA	NA	NA	NA	NA	NA	NA
I_1305853	I	1305853	0.686344	Slope	4.05719	0	NA	NA	NA	NA	NA	NA	NA	NA	NA
I_1307439	I	1307439	0.974711	Slope	4.05719	0	NA	NA	NA	NA	NA	NA	NA	NA	NA
I_1308380	I	1308380	1.47535	Slope	4.05719	0	NA	NA	NA	NA	NA	NA	NA	NA	NA
I_1311054	I	1311054	0.341962	Slope	4.05719	0	NA	NA	NA	NA	NA	NA	NA	NA	NA
I_1312700	I	1312700	0.100283	Slope	4.05719	0	NA	NA	NA	NA	NA	NA	NA	NA	NA
I_1313019	I	1313019	0.0108589	Slope	4.05719	0	NA	NA	NA	NA	NA	NA	NA	NA	NA
I_1319628	I	1319628	0.0087018	Slope	4.05719	0	NA	NA	NA	NA	NA	NA	NA	NA	NA
I_1322018	I	1322018	0.348771	Slope	4.05719	0	NA	NA	NA	NA	NA	NA	NA	NA	NA
I_1323352	I	1323352	0.745241	Slope	4.05719	0	NA	NA	NA	NA	NA	NA	NA	NA	NA
I_1323753	I	1323753	0.686344	Slope	4.05719	0	NA	NA	NA	NA	NA	NA	NA	NA	NA
I_1326318	I	1326318	0.118814	Slope	4.05719	0	NA	NA	NA	NA	NA	NA	NA	NA	NA
I_1333076	I	1333076	0.481443	Slope	4.05719	0	NA	NA	NA	NA	NA	NA	NA	NA	NA
I_1336302	I	1336302	0.495785	Slope	4.05719	0	NA	NA	NA	NA	NA	NA	NA	NA	NA
I_1337527	I	1337527	0.501808	Slope	4.05719	0	NA	NA	NA	NA	NA	NA	NA	NA	NA
I_1338957	I	1338957	1.55297	Slope	4.05719	0	NA	NA	NA	NA	NA	NA	NA	NA	NA
I_1339689	I	1339689	0.00844211	Slope	4.05719	0	NA	NA	NA	NA	NA	NA	NA	NA	NA
I_1345095	I	1345095	1.04683	Slope	4.05719	0	NA	NA	NA	NA	NA	NA	NA	NA	NA
I_1354337	I	1354337	0.393404	Slope	4.05719	0	NA	NA	NA	NA	NA	NA	NA	NA	NA
I_1356011	I	1356011	0.782631	Slope	4.05719	0	NA	NA	NA	NA	NA	NA	NA	NA	NA
I_1358191	I	1358191	0.238405	Slope	4.05719	0	NA	NA	NA	NA	NA	NA	NA	NA	NA
I_1358450	I	1358450	0.0692151	Slope	4.05719	0	NA	NA	NA	NA	NA	NA	NA	NA	NA
I_1359466	I	1359466	1.06046	Slope	4.05719	0	NA	NA	NA	NA	NA	NA	NA	NA	NA
I_1367615	I	1367615	0.556745	Slope	4.05719	0	NA	NA	NA	NA	NA	NA	NA	NA	NA
I_1367896	I	1367896	0.257947	Slope	4.05719	0	NA	NA	NA	NA	NA	NA	NA	NA	NA
I_1377524	I	1377524	1.28942	Slope	4.05719	0	NA	NA	NA	NA	NA	NA	NA	NA	NA
I_1389190	I	1389190	0.319459	Slope	4.05719	0	NA	NA	NA	NA	NA	NA	NA	NA	NA
I_1392829	I	1392829	1.00829	Slope	4.05719	0	NA	NA	NA	NA	NA	NA	NA	NA	NA
I_1394542	I	1394542	0.752876	Slope	4.05719	0	NA	NA	NA	NA	NA	NA	NA	NA	NA
I_1394700	I	1394700	0.127622	Slope	4.05719	0	NA	NA	NA	NA	NA	NA	NA	NA	NA
I_1400363	I	1400363	0.38136	Slope	4.05719	0	NA	NA	NA	NA	NA	NA	NA	NA	NA
I_1400428	I	1400428	0.79693	Slope	4.05719	0	NA	NA	NA	NA	NA	NA	NA	NA	NA
I_1402717	I	1402717	0.0840317	Slope	4.05719	0	NA	NA	NA	NA	NA	NA	NA	NA	NA
I_1405190	I	1405190	0.727956	Slope	4.05719	0	NA	NA	NA	NA	NA	NA	NA	NA	NA
I_1406148	I	1406148	0.837013	Slope	4.05719	0	NA	NA	NA	NA	NA	NA	NA	NA	NA
I_1407455	I	1407455	0.00420283	Slope	4.05719	0	NA	NA	NA	NA	NA	NA	NA	NA	NA
I_1410049	I	1410049	0.236171	Slope	4.05719	0	NA	NA	NA	NA	NA	NA	NA	NA	NA
I_1410058	I	1410058	0.4399	Slope	4.05719	0	NA	NA	NA	NA	NA	NA	NA	NA	NA
I_1410067	I	1410067	0.0195106	Slope	4.05719	0	NA	NA	NA	NA	NA	NA	NA	NA	NA
I_1410349	I	1410349	0.253132	Slope	4.05719	0	NA	NA	NA	NA	NA	NA	NA	NA	NA
I_1415438	I	1415438	0.204304	Slope	4.05719	0	NA	NA	NA	NA	NA	NA	NA	NA	NA
I_1416014	I	1416014	0.440333	Slope	4.05719	0	NA	NA	NA	NA	NA	NA	NA	NA	NA
I_1416044	I	1416044	0.0185326	Slope	4.05719	0	NA	NA	NA	NA	NA	NA	NA	NA	NA
I_1416933	I	1416933	0.0624502	Slope	4.05719	0	NA	NA	NA	NA	NA	NA	NA	NA	NA
I_1416955	I	1416955	0.782631	Slope	4.05719	0	NA	NA	NA	NA	NA	NA	NA	NA	NA
I_1420566	I	1420566	0.194865	Slope	4.05719	0	NA	NA	NA	NA	NA	NA	NA	NA	NA
I_1422789	I	1422789	0.195719	Slope	4.05719	0	NA	NA	NA	NA	NA	NA	NA	NA	NA
I_1425836	I	1425836	0.0239274	Slope	4.05719	0	NA	NA	NA	NA	NA	NA	NA	NA	NA
I_1426048	I	1426048	0.0312832	Slope	4.05719	0	NA	NA	NA	NA	NA	NA	NA	NA	NA
I_1427028	I	1427028	0.397595	Slope	4.05719	0	NA	NA	NA	NA	NA	NA	NA	NA	NA
I_1435250	I	1435250	1.04533	Slope	4.05719	0	NA	NA	NA	NA	NA	NA	NA	NA	NA
I_1451070	I	1451070	0.0499352	Slope	4.05719	0	NA	NA	NA	NA	NA	NA	NA	NA	NA
I_1459063	I	1459063	0.0906278	Slope	4.05719	0	NA	NA	NA	NA	NA	NA	NA	NA	NA
I_1460652	I	1460652	0.332085	Slope	4.05719	0	NA	NA	NA	NA	NA	NA	NA	NA	NA
I_1461251	I	1461251	0.207479	Slope	4.05719	0	NA	NA	NA	NA	NA	NA	NA	NA	NA
I_1466440	I	1466440	0.487391	Slope	4.05719	0	NA	NA	NA	NA	NA	NA	NA	NA	NA
I_1466639	I	1466639	0.726107	Slope	4.05719	0	NA	NA	NA	NA	NA	NA	NA	NA	NA
I_1480815	I	1480815	0.228003	Slope	4.05719	0	NA	NA	NA	NA	NA	NA	NA	NA	NA
I_1482176	I	1482176	0.620785	Slope	4.05719	0	NA	NA	NA	NA	NA	NA	NA	NA	NA
I_1482648	I	1482648	0.4175	Slope	4.05719	0	NA	NA	NA	NA	NA	NA	NA	NA	NA
I_1484843	I	1484843	0.3089	Slope	4.05719	0	NA	NA	NA	NA	NA	NA	NA	NA	NA
I_1486538	I	1486538	0.468897	Slope	4.05719	0	NA	NA	NA	NA	NA	NA	NA	NA	NA
I_1486672	I	1486672	0.179443	Slope	4.05719	0	NA	NA	NA	NA	NA	NA	NA	NA	NA
I_1486763	I	1486763	0.67497	Slope	4.05719	0	NA	NA	NA	NA	NA	NA	NA	NA	NA
I_1486849	I	1486849	0.215164	Slope	4.05719	0	NA	NA	NA	NA	NA	NA	NA	NA	NA
I_1486876	I	1486876	0.110864	Slope	4.05719	0	NA	NA	NA	NA	NA	NA	NA	NA	NA
I_1490257	I	1490257	0.233874	Slope	4.05719	0	NA	NA	NA	NA	NA	NA	NA	NA	NA
I_1494616	I	1494616	0.782631	Slope	4.05719	0	NA	NA	NA	NA	NA	NA	NA	NA	NA
I_1499182	I	1499182	0.273192	Slope	4.05719	0	NA	NA	NA	NA	NA	NA	NA	NA	NA
I_1503260	I	1503260	0.280954	Slope	4.05719	0	NA	NA	NA	NA	NA	NA	NA	NA	NA
I_1505366	I	1505366	0.382287	Slope	4.05719	0	NA	NA	NA	NA	NA	NA	NA	NA	NA
I_1510450	I	1510450	0.413159	Slope	4.05719	0	NA	NA	NA	NA	NA	NA	NA	NA	NA
I_1510599	I	1510599	0.087075	Slope	4.05719	0	NA	NA	NA	NA	NA	NA	NA	NA	NA
I_1511208	I	1511208	0.634381	Slope	4.05719	0	NA	NA	NA	NA	NA	NA	NA	NA	NA
I_1512355	I	1512355	0.0153343	Slope	4.05719	0	NA	NA	NA	NA	NA	NA	NA	NA	NA
I_1524519	I	1524519	0.372123	Slope	4.05719	0	NA	NA	NA	NA	NA	NA	NA	NA	NA
I_1536288	I	1536288	0.667758	Slope	4.05719	0	NA	NA	NA	NA	NA	NA	NA	NA	NA
I_1536513	I	1536513	0.668613	Slope	4.05719	0	NA	NA	NA	NA	NA	NA	NA	NA	NA
I_1537385	I	1537385	0.720519	Slope	4.05719	0	NA	NA	NA	NA	NA	NA	NA	NA	NA
I_1543438	I	1543438	0.237758	Slope	4.05719	0	NA	NA	NA	NA	NA	NA	NA	NA	NA
I_1548612	I	1548612	0.177336	Slope	4.05719	0	NA	NA	NA	NA	NA	NA	NA	NA	NA
I_1549075	I	1549075	0.594497	Slope	4.05719	0	NA	NA	NA	NA	NA	NA	NA	NA	NA
I_1549172	I	1549172	0.0225104	Slope	4.05719	0	NA	NA	NA	NA	NA	NA	NA	NA	NA
I_1550166	I	1550166	0.19011	Slope	4.05719	0	NA	NA	NA	NA	NA	NA	NA	NA	NA
I_1550509	I	1550509	1.08264	Slope	4.05719	0	NA	NA	NA	NA	NA	NA	NA	NA	NA
I_1552630	I	1552630	0.0409135	Slope	4.05719	0	NA	NA	NA	NA	NA	NA	NA	NA	NA
I_1557331	I	1557331	0.729482	Slope	4.05719	0	NA	NA	NA	NA	NA	NA	NA	NA	NA
I_1557541	I	1557541	0.882095	Slope	4.05719	0	NA	NA	NA	NA	NA	NA	NA	NA	NA
I_1557763	I	1557763	0.273192	Slope	4.05719	0	NA	NA	NA	NA	NA	NA	NA	NA	NA
I_1557984	I	1557984	0.334225	Slope	4.05719	0	NA	NA	NA	NA	NA	NA	NA	NA	NA
I_1560477	I	1560477	0.370088	Slope	4.05719	0	NA	NA	NA	NA	NA	NA	NA	NA	NA
I_1562198	I	1562198	0.435402	Slope	4.05719	0	NA	NA	NA	NA	NA	NA	NA	NA	NA
I_1571268	I	1571268	0.193168	Slope	4.05719	0	NA	NA	NA	NA	NA	NA	NA	NA	NA
I_1572543	I	1572543	0.0827852	Slope	4.05719	0	NA	NA	NA	NA	NA	NA	NA	NA	NA
I_1572898	I	1572898	0.480721	Slope	4.05719	0	NA	NA	NA	NA	NA	NA	NA	NA	NA
I_1573060	I	1573060	1.07174	Slope	4.05719	0	NA	NA	NA	NA	NA	NA	NA	NA	NA
I_1575606	I	1575606	0.046853	Slope	4.05719	0	NA	NA	NA	NA	NA	NA	NA	NA	NA
I_1575836	I	1575836	0.5143	Slope	4.05719	0	NA	NA	NA	NA	NA	NA	NA	NA	NA
I_1580498	I	1580498	0.492797	Slope	4.05719	0	NA	NA	NA	NA	NA	NA	NA	NA	NA
I_1580905	I	1580905	0.158151	Slope	4.05719	0	NA	NA	NA	NA	NA	NA	NA	NA	NA
I_1581701	I	1581701	0.708538	Slope	4.05719	0	NA	NA	NA	NA	NA	NA	NA	NA	NA
I_1583086	I	1583086	0.0574333	Slope	4.05719	0	NA	NA	NA	NA	NA	NA	NA	NA	NA
I_1583981	I	1583981	0.094421	Slope	4.05719	0	NA	NA	NA	NA	NA	NA	NA	NA	NA
I_1585637	I	1585637	0.594497	Slope	4.05719	0	NA	NA	NA	NA	NA	NA	NA	NA	NA
I_1585923	I	1585923	0.43933	Slope	4.05719	0	NA	NA	NA	NA	NA	NA	NA	NA	NA
I_1587734	I	1587734	0.19011	Slope	4.05719	0	NA	NA	NA	NA	NA	NA	NA	NA	NA
I_1588602	I	1588602	0.721214	Slope	4.05719	0	NA	NA	NA	NA	NA	NA	NA	NA	NA
I_1588855	I	1588855	0.469768	Slope	4.05719	0	NA	NA	NA	NA	NA	NA	NA	NA	NA
I_1588915	I	1588915	0.273192	Slope	4.05719	0	NA	NA	NA	NA	NA	NA	NA	NA	NA
I_1592181	I	1592181	0.788532	Slope	4.05719	0	NA	NA	NA	NA	NA	NA	NA	NA	NA
I_1592712	I	1592712	0.0313571	Slope	4.05719	0	NA	NA	NA	NA	NA	NA	NA	NA	NA
I_1597159	I	1597159	0.295902	Slope	4.05719	0	NA	NA	NA	NA	NA	NA	NA	NA	NA
I_1597935	I	1597935	0.404475	Slope	4.05719	0	NA	NA	NA	NA	NA	NA	NA	NA	NA
I_1599601	I	1599601	1.17147	Slope	4.05719	0	NA	NA	NA	NA	NA	NA	NA	NA	NA
I_1600073	I	1600073	0.283368	Slope	4.05719	0	NA	NA	NA	NA	NA	NA	NA	NA	NA
I_1600076	I	1600076	0.894166	Slope	4.05719	0	NA	NA	NA	NA	NA	NA	NA	NA	NA
I_1601130	I	1601130	0.179352	Slope	4.05719	0	NA	NA	NA	NA	NA	NA	NA	NA	NA
I_1601293	I	1601293	1.24201	Slope	4.05719	0	NA	NA	NA	NA	NA	NA	NA	NA	NA
I_1604842	I	1604842	0.0928813	Slope	4.05719	0	NA	NA	NA	NA	NA	NA	NA	NA	NA
I_1606465	I	1606465	0.70612	Slope	4.05719	0	NA	NA	NA	NA	NA	NA	NA	NA	NA
I_1610703	I	1610703	0.0221115	Slope	4.05719	0	NA	NA	NA	NA	NA	NA	NA	NA	NA
I_1622939	I	1622939	1.4837	Slope	4.05719	0	NA	NA	NA	NA	NA	NA	NA	NA	NA
I_1623613	I	1623613	0.765472	Slope	4.05719	0	NA	NA	NA	NA	NA	NA	NA	NA	NA
I_1625311	I	1625311	0.17261	Slope	4.05719	0	NA	NA	NA	NA	NA	NA	NA	NA	NA
I_1626141	I	1626141	0.26795	Slope	4.05719	0	NA	NA	NA	NA	NA	NA	NA	NA	NA
I_1627088	I	1627088	0.00260738	Slope	4.05719	0	NA	NA	NA	NA	NA	NA	NA	NA	NA
I_1634040	I	1634040	1.03601	Slope	4.05719	0	NA	NA	NA	NA	NA	NA	NA	NA	NA
I_1635052	I	1635052	0.700628	Slope	4.05719	0	NA	NA	NA	NA	NA	NA	NA	NA	NA
I_1635216	I	1635216	0.0474096	Slope	4.05719	0	NA	NA	NA	NA	NA	NA	NA	NA	NA
I_1636305	I	1636305	0.463859	Slope	4.05719	0	NA	NA	NA	NA	NA	NA	NA	NA	NA
I_1636553	I	1636553	0.152546	Slope	4.05719	0	NA	NA	NA	NA	NA	NA	NA	NA	NA
I_1638119	I	1638119	0.0785059	Slope	4.05719	0	NA	NA	NA	NA	NA	NA	NA	NA	NA
I_1638691	I	1638691	0.000303891	Slope	4.05719	0	NA	NA	NA	NA	NA	NA	NA	NA	NA
I_1642990	I	1642990	0.268546	Slope	4.05719	0	NA	NA	NA	NA	NA	NA	NA	NA	NA
I_1644194	I	1644194	0.440671	Slope	4.05719	0	NA	NA	NA	NA	NA	NA	NA	NA	NA
I_1645630	I	1645630	1.41066	Slope	4.05719	0	NA	NA	NA	NA	NA	NA	NA	NA	NA
I_1649125	I	1649125	0.460743	Slope	4.05719	0	NA	NA	NA	NA	NA	NA	NA	NA	NA
I_1649783	I	1649783	0.2295	Slope	4.05719	0	NA	NA	NA	NA	NA	NA	NA	NA	NA
I_1649959	I	1649959	0.298386	Slope	4.05719	0	NA	NA	NA	NA	NA	NA	NA	NA	NA
I_1650169	I	1650169	0.263838	Slope	4.05719	0	NA	NA	NA	NA	NA	NA	NA	NA	NA
I_1651826	I	1651826	0.546837	Slope	4.05719	0	NA	NA	NA	NA	NA	NA	NA	NA	NA
I_1653135	I	1653135	0.721334	Slope	4.05719	0	NA	NA	NA	NA	NA	NA	NA	NA	NA
I_1654023	I	1654023	0.0816331	Slope	4.05719	0	NA	NA	NA	NA	NA	NA	NA	NA	NA
I_1654361	I	1654361	0.618084	Slope	4.05719	0	NA	NA	NA	NA	NA	NA	NA	NA	NA
I_1655408	I	1655408	0.716319	Slope	4.05719	0	NA	NA	NA	NA	NA	NA	NA	NA	NA
I_1656763	I	1656763	0.117219	Slope	4.05719	0	NA	NA	NA	NA	NA	NA	NA	NA	NA
I_1657047	I	1657047	0.0785059	Slope	4.05719	0	NA	NA	NA	NA	NA	NA	NA	NA	NA
I_1657899	I	1657899	0.24168	Slope	4.05719	0	NA	NA	NA	NA	NA	NA	NA	NA	NA
I_1657940	I	1657940	0.897347	Slope	4.05719	0	NA	NA	NA	NA	NA	NA	NA	NA	NA
I_1664276	I	1664276	1.41066	Slope	4.05719	0	NA	NA	NA	NA	NA	NA	NA	NA	NA
I_1664327	I	1664327	0.233874	Slope	4.05719	0	NA	NA	NA	NA	NA	NA	NA	NA	NA
I_1664344	I	1664344	0.0398995	Slope	4.05719	0	NA	NA	NA	NA	NA	NA	NA	NA	NA
I_1666416	I	1666416	0.962212	Slope	4.05719	0	NA	NA	NA	NA	NA	NA	NA	NA	NA
I_1667280	I	1667280	0.495723	Slope	4.05719	0	NA	NA	NA	NA	NA	NA	NA	NA	NA
I_1667421	I	1667421	0.326458	Slope	4.05719	0	NA	NA	NA	NA	NA	NA	NA	NA	NA
I_1667992	I	1667992	0.844072	Slope	4.05719	0	NA	NA	NA	NA	NA	NA	NA	NA	NA
I_1668607	I	1668607	1.4805	Slope	4.05719	0	NA	NA	NA	NA	NA	NA	NA	NA	NA
I_1670909	I	1670909	0.0945727	Slope	4.05719	0	NA	NA	NA	NA	NA	NA	NA	NA	NA
I_1672676	I	1672676	0.158151	Slope	4.05719	0	NA	NA	NA	NA	NA	NA	NA	NA	NA
I_1673141	I	1673141	0.926969	Slope	4.05719	0	NA	NA	NA	NA	NA	NA	NA	NA	NA
I_1673170	I	1673170	0.31337	Slope	4.05719	0	NA	NA	NA	NA	NA	NA	NA	NA	NA
I_1673864	I	1673864	1.13448	Slope	4.05719	0	NA	NA	NA	NA	NA	NA	NA	NA	NA
I_1675492	I	1675492	0.210197	Slope	4.05719	0	NA	NA	NA	NA	NA	NA	NA	NA	NA
I_1676688	I	1676688	0.345071	Slope	4.05719	0	NA	NA	NA	NA	NA	NA	NA	NA	NA
I_1677002	I	1677002	0.232676	Slope	4.05719	0	NA	NA	NA	NA	NA	NA	NA	NA	NA
I_1677771	I	1677771	0.605368	Slope	4.05719	0	NA	NA	NA	NA	NA	NA	NA	NA	NA
I_1677845	I	1677845	1.51984	Slope	4.05719	0	NA	NA	NA	NA	NA	NA	NA	NA	NA
I_1679070	I	1679070	0.262747	Slope	4.05719	0	NA	NA	NA	NA	NA	NA	NA	NA	NA
I_1679350	I	1679350	0.532313	Slope	4.05719	0	NA	NA	NA	NA	NA	NA	NA	NA	NA
I_1681731	I	1681731	0.321255	Slope	4.05719	0	NA	NA	NA	NA	NA	NA	NA	NA	NA
I_1682992	I	1682992	0.362322	Slope	4.05719	0	NA	NA	NA	NA	NA	NA	NA	NA	NA
I_1683529	I	1683529	0.172769	Slope	4.05719	0	NA	NA	NA	NA	NA	NA	NA	NA	NA
I_1686891	I	1686891	0.636496	Slope	4.05719	0	NA	NA	NA	NA	NA	NA	NA	NA	NA
I_1687738	I	1687738	0.962212	Slope	4.05719	0	NA	NA	NA	NA	NA	NA	NA	NA	NA
I_1688960	I	1688960	0.096774	Slope	4.05719	0	NA	NA	NA	NA	NA	NA	NA	NA	NA
I_1689321	I	1689321	0.269406	Slope	4.05719	0	NA	NA	NA	NA	NA	NA	NA	NA	NA
I_1691867	I	1691867	0.00048737	Slope	4.05719	0	NA	NA	NA	NA	NA	NA	NA	NA	NA
I_1691884	I	1691884	0.291949	Slope	4.05719	0	NA	NA	NA	NA	NA	NA	NA	NA	NA
I_1692857	I	1692857	0.303218	Slope	4.05719	0	NA	NA	NA	NA	NA	NA	NA	NA	NA
I_1693624	I	1693624	0.0254446	Slope	4.05719	0	NA	NA	NA	NA	NA	NA	NA	NA	NA
I_1693647	I	1693647	1.19798	Slope	4.05719	0	NA	NA	NA	NA	NA	NA	NA	NA	NA
I_1695463	I	1695463	0.0679102	Slope	4.05719	0	NA	NA	NA	NA	NA	NA	NA	NA	NA
I_1697628	I	1697628	0.681924	Slope	4.05719	0	NA	NA	NA	NA	NA	NA	NA	NA	NA
I_1697969	I	1697969	0.177152	Slope	4.05719	0	NA	NA	NA	NA	NA	NA	NA	NA	NA
I_1698671	I	1698671	0.277491	Slope	4.05719	0	NA	NA	NA	NA	NA	NA	NA	NA	NA
I_1700479	I	1700479	0.432431	Slope	4.05719	0	NA	NA	NA	NA	NA	NA	NA	NA	NA
I_1701178	I	1701178	0.0290176	Slope	4.05719	0	NA	NA	NA	NA	NA	NA	NA	NA	NA
I_1702711	I	1702711	0.208401	Slope	4.05719	0	NA	NA	NA	NA	NA	NA	NA	NA	NA
I_1703084	I	1703084	1.24685	Slope	4.05719	0	NA	NA	NA	NA	NA	NA	NA	NA	NA
I_1704244	I	1704244	0.481174	Slope	4.05719	0	NA	NA	NA	NA	NA	NA	NA	NA	NA
I_1704374	I	1704374	0.238119	Slope	4.05719	0	NA	NA	NA	NA	NA	NA	NA	NA	NA
I_1711285	I	1711285	0.156782	Slope	4.05719	0	NA	NA	NA	NA	NA	NA	NA	NA	NA
I_1715240	I	1715240	0.736108	Slope	4.05719	0	NA	NA	NA	NA	NA	NA	NA	NA	NA
I_1715441	I	1715441	0.289976	Slope	4.05719	0	NA	NA	NA	NA	NA	NA	NA	NA	NA
I_1717232	I	1717232	0.342217	Slope	4.05719	0	NA	NA	NA	NA	NA	NA	NA	NA	NA
I_1717957	I	1717957	1.29794	Slope	4.05719	0	NA	NA	NA	NA	NA	NA	NA	NA	NA
I_1718442	I	1718442	0.236407	Slope	4.05719	0	NA	NA	NA	NA	NA	NA	NA	NA	NA
I_1718986	I	1718986	0.47171	Slope	4.05719	0	NA	NA	NA	NA	NA	NA	NA	NA	NA
I_1718987	I	1718987	0.501487	Slope	4.05719	0	NA	NA	NA	NA	NA	NA	NA	NA	NA
I_1719434	I	1719434	1.38729	Slope	4.05719	0	NA	NA	NA	NA	NA	NA	NA	NA	NA
I_1721466	I	1721466	0.397394	Slope	4.05719	0	NA	NA	NA	NA	NA	NA	NA	NA	NA
I_1721502	I	1721502	0.266391	Slope	4.05719	0	NA	NA	NA	NA	NA	NA	NA	NA	NA
I_1722651	I	1722651	0.0692335	Slope	4.05719	0	NA	NA	NA	NA	NA	NA	NA	NA	NA
I_1725858	I	1725858	0.489824	Slope	4.05719	0	NA	NA	NA	NA	NA	NA	NA	NA	NA
I_1726395	I	1726395	0.249546	Slope	4.05719	0	NA	NA	NA	NA	NA	NA	NA	NA	NA
I_1726396	I	1726396	0.0750343	Slope	4.05719	0	NA	NA	NA	NA	NA	NA	NA	NA	NA
I_1727192	I	1727192	1.4356	Slope	4.05719	0	NA	NA	NA	NA	NA	NA	NA	NA	NA
I_1727308	I	1727308	0.0905134	Slope	4.05719	0	NA	NA	NA	NA	NA	NA	NA	NA	NA
I_1727426	I	1727426	0.0229423	Slope	4.05719	0	NA	NA	NA	NA	NA	NA	NA	NA	NA
I_1729328	I	1729328	0.927022	Slope	4.05719	0	NA	NA	NA	NA	NA	NA	NA	NA	NA
I_1729512	I	1729512	0.93968	Slope	4.05719	0	NA	NA	NA	NA	NA	NA	NA	NA	NA
I_1730710	I	1730710	0.609665	Slope	4.05719	0	NA	NA	NA	NA	NA	NA	NA	NA	NA
I_1731687	I	1731687	0.165185	Slope	4.05719	0	NA	NA	NA	NA	NA	NA	NA	NA	NA
I_1732348	I	1732348	0.691213	Slope	4.05719	0	NA	NA	NA	NA	NA	NA	NA	NA	NA
I_1733114	I	1733114	1.09577	Slope	4.05719	0	NA	NA	NA	NA	NA	NA	NA	NA	NA
I_1734383	I	1734383	0.237938	Slope	4.05719	0	NA	NA	NA	NA	NA	NA	NA	NA	NA
I_1734927	I	1734927	0.215883	Slope	4.05719	0	NA	NA	NA	NA	NA	NA	NA	NA	NA
I_1736527	I	1736527	0.236407	Slope	4.05719	0	NA	NA	NA	NA	NA	NA	NA	NA	NA
I_1738955	I	1738955	0.0706553	Slope	4.05719	0	NA	NA	NA	NA	NA	NA	NA	NA	NA
I_1739195	I	1739195	0.397394	Slope	4.05719	0	NA	NA	NA	NA	NA	NA	NA	NA	NA
I_1739301	I	1739301	0.104252	Slope	4.05719	0	NA	NA	NA	NA	NA	NA	NA	NA	NA
I_1740998	I	1740998	0.711366	Slope	4.05719	0	NA	NA	NA	NA	NA	NA	NA	NA	NA
I_1748330	I	1748330	0.351778	Slope	4.05719	0	NA	NA	NA	NA	NA	NA	NA	NA	NA
I_1750813	I	1750813	0.31044	Slope	4.05719	0	NA	NA	NA	NA	NA	NA	NA	NA	NA
I_1751480	I	1751480	0.0229423	Slope	4.05719	0	NA	NA	NA	NA	NA	NA	NA	NA	NA
I_1758985	I	1758985	1.50251	Slope	4.05719	0	NA	NA	NA	NA	NA	NA	NA	NA	NA
I_1760785	I	1760785	1.00326	Slope	4.05719	0	NA	NA	NA	NA	NA	NA	NA	NA	NA
I_1762305	I	1762305	0.176266	Slope	4.05719	0	NA	NA	NA	NA	NA	NA	NA	NA	NA
I_1763622	I	1763622	0.976745	Slope	4.05719	0	NA	NA	NA	NA	NA	NA	NA	NA	NA
I_1763719	I	1763719	1.06606	Slope	4.05719	0	NA	NA	NA	NA	NA	NA	NA	NA	NA
I_1763837	I	1763837	0.370088	Slope	4.05719	0	NA	NA	NA	NA	NA	NA	NA	NA	NA
I_1768295	I	1768295	0.147221	Slope	4.05719	0	NA	NA	NA	NA	NA	NA	NA	NA	NA
I_1768469	I	1768469	0.880902	Slope	4.05719	0	NA	NA	NA	NA	NA	NA	NA	NA	NA
I_1775399	I	1775399	0.18977	Slope	4.05719	0	NA	NA	NA	NA	NA	NA	NA	NA	NA
I_1777085	I	1777085	0.537198	Slope	4.05719	0	NA	NA	NA	NA	NA	NA	NA	NA	NA
I_1777098	I	1777098	0.560062	Slope	4.05719	0	NA	NA	NA	NA	NA	NA	NA	NA	NA
I_1777178	I	1777178	0.0388434	Slope	4.05719	0	NA	NA	NA	NA	NA	NA	NA	NA	NA
I_1778576	I	1778576	1.12999	Slope	4.05719	0	NA	NA	NA	NA	NA	NA	NA	NA	NA
I_1778736	I	1778736	0.728159	Slope	4.05719	0	NA	NA	NA	NA	NA	NA	NA	NA	NA
I_1780496	I	1780496	0.294889	Slope	4.05719	0	NA	NA	NA	NA	NA	NA	NA	NA	NA
I_1780524	I	1780524	0.225766	Slope	4.05719	0	NA	NA	NA	NA	NA	NA	NA	NA	NA
I_1781567	I	1781567	0.687062	Slope	4.05719	0	NA	NA	NA	NA	NA	NA	NA	NA	NA
I_1790278	I	1790278	0.133195	Slope	4.05719	0	NA	NA	NA	NA	NA	NA	NA	NA	NA
I_1790492	I	1790492	0.461841	Slope	4.05719	0	NA	NA	NA	NA	NA	NA	NA	NA	NA
I_1791364	I	1791364	0.205111	Slope	4.05719	0	NA	NA	NA	NA	NA	NA	NA	NA	NA
I_1792401	I	1792401	0.166512	Slope	4.05719	0	NA	NA	NA	NA	NA	NA	NA	NA	NA
I_1793122	I	1793122	0.268997	Slope	4.05719	0	NA	NA	NA	NA	NA	NA	NA	NA	NA
I_1794822	I	1794822	0.385076	Slope	4.05719	0	NA	NA	NA	NA	NA	NA	NA	NA	NA
I_1795670	I	1795670	0.385492	Slope	4.05719	0	NA	NA	NA	NA	NA	NA	NA	NA	NA
I_1797155	I	1797155	1.50251	Slope	4.05719	0	NA	NA	NA	NA	NA	NA	NA	NA	NA
I_1800327	I	1800327	0.0135971	Slope	4.05719	0	NA	NA	NA	NA	NA	NA	NA	NA	NA
I_1802220	I	1802220	0.420279	Slope	4.05719	0	NA	NA	NA	NA	NA	NA	NA	NA	NA
I_1803069	I	1803069	0.571297	Slope	4.05719	0	NA	NA	NA	NA	NA	NA	NA	NA	NA
I_1804162	I	1804162	0.451716	Slope	4.05719	0	NA	NA	NA	NA	NA	NA	NA	NA	NA
I_1805576	I	1805576	0.647035	Slope	4.05719	0	NA	NA	NA	NA	NA	NA	NA	NA	NA
I_1805726	I	1805726	1.05247	Slope	4.05719	0	NA	NA	NA	NA	NA	NA	NA	NA	NA
I_1806047	I	1806047	1.10838	Slope	4.05719	0	NA	NA	NA	NA	NA	NA	NA	NA	NA
I_1806250	I	1806250	0.856984	Slope	4.05719	0	NA	NA	NA	NA	NA	NA	NA	NA	NA
I_1806906	I	1806906	0.0798552	Slope	4.05719	0	NA	NA	NA	NA	NA	NA	NA	NA	NA
I_1808883	I	1808883	0.675166	Slope	4.05719	0	NA	NA	NA	NA	NA	NA	NA	NA	NA
I_1810459	I	1810459	0.0388434	Slope	4.05719	0	NA	NA	NA	NA	NA	NA	NA	NA	NA
I_1812887	I	1812887	1.26811	Slope	4.05719	0	NA	NA	NA	NA	NA	NA	NA	NA	NA
I_1814387	I	1814387	0.394192	Slope	4.05719	0	NA	NA	NA	NA	NA	NA	NA	NA	NA
I_1817047	I	1817047	0.385492	Slope	4.05719	0	NA	NA	NA	NA	NA	NA	NA	NA	NA
I_1817071	I	1817071	0.425617	Slope	4.05719	0	NA	NA	NA	NA	NA	NA	NA	NA	NA
I_1817078	I	1817078	0.158151	Slope	4.05719	0	NA	NA	NA	NA	NA	NA	NA	NA	NA
I_1817141	I	1817141	0.128235	Slope	4.05719	0	NA	NA	NA	NA	NA	NA	NA	NA	NA
I_1817983	I	1817983	0.393372	Slope	4.05719	0	NA	NA	NA	NA	NA	NA	NA	NA	NA
I_1819339	I	1819339	0.227628	Slope	4.05719	0	NA	NA	NA	NA	NA	NA	NA	NA	NA
I_1819404	I	1819404	0.364311	Slope	4.05719	0	NA	NA	NA	NA	NA	NA	NA	NA	NA
I_1820122	I	1820122	0.376149	Slope	4.05719	0	NA	NA	NA	NA	NA	NA	NA	NA	NA
I_1820185	I	1820185	0.163955	Slope	4.05719	0	NA	NA	NA	NA	NA	NA	NA	NA	NA
I_1822641	I	1822641	1.22187	Slope	4.05719	0	NA	NA	NA	NA	NA	NA	NA	NA	NA
I_1823335	I	1823335	0.00356119	Slope	4.05719	0	NA	NA	NA	NA	NA	NA	NA	NA	NA
I_1825779	I	1825779	0.706429	Slope	4.05719	0	NA	NA	NA	NA	NA	NA	NA	NA	NA
I_1826318	I	1826318	1.65768	Slope	4.05719	0	NA	NA	NA	NA	NA	NA	NA	NA	NA
I_1826429	I	1826429	0.0729891	Slope	4.05719	0	NA	NA	NA	NA	NA	NA	NA	NA	NA
I_1827274	I	1827274	1.5829	Slope	4.05719	0	NA	NA	NA	NA	NA	NA	NA	NA	NA
I_1827954	I	1827954	1.26811	Slope	4.05719	0	NA	NA	NA	NA	NA	NA	NA	NA	NA
I_1829726	I	1829726	0.00530815	Slope	4.05719	0	NA	NA	NA	NA	NA	NA	NA	NA	NA
I_1829903	I	1829903	1.05681	Slope	4.05719	0	NA	NA	NA	NA	NA	NA	NA	NA	NA
I_1830282	I	1830282	0.543383	Slope	4.05719	0	NA	NA	NA	NA	NA	NA	NA	NA	NA
I_1830678	I	1830678	0.557688	Slope	4.05719	0	NA	NA	NA	NA	NA	NA	NA	NA	NA
I_1831741	I	1831741	0.0150662	Slope	4.05719	0	NA	NA	NA	NA	NA	NA	NA	NA	NA
I_1831796	I	1831796	0.0700917	Slope	4.05719	0	NA	NA	NA	NA	NA	NA	NA	NA	NA
I_1832760	I	1832760	0.433959	Slope	4.05719	0	NA	NA	NA	NA	NA	NA	NA	NA	NA
I_1836625	I	1836625	0.234044	Slope	4.05719	0	NA	NA	NA	NA	NA	NA	NA	NA	NA
I_1836887	I	1836887	0.241544	Slope	4.05719	0	NA	NA	NA	NA	NA	NA	NA	NA	NA
I_1838364	I	1838364	0.260987	Slope	4.05719	0	NA	NA	NA	NA	NA	NA	NA	NA	NA
I_1838366	I	1838366	0.0729891	Slope	4.05719	0	NA	NA	NA	NA	NA	NA	NA	NA	NA
I_1840495	I	1840495	0.762486	Slope	4.05719	0	NA	NA	NA	NA	NA	NA	NA	NA	NA
I_1841116	I	1841116	0.0790111	Slope	4.05719	0	NA	NA	NA	NA	NA	NA	NA	NA	NA
I_1843849	I	1843849	1.52066	Slope	4.05719	0	NA	NA	NA	NA	NA	NA	NA	NA	NA
I_1845052	I	1845052	0.619665	Slope	4.05719	0	NA	NA	NA	NA	NA	NA	NA	NA	NA
I_1845121	I	1845121	0.413844	Slope	4.05719	0	NA	NA	NA	NA	NA	NA	NA	NA	NA
I_1845215	I	1845215	0.0844774	Slope	4.05719	0	NA	NA	NA	NA	NA	NA	NA	NA	NA
I_1845495	I	1845495	0.219119	Slope	4.05719	0	NA	NA	NA	NA	NA	NA	NA	NA	NA
I_1846045	I	1846045	0.539787	Slope	4.05719	0	NA	NA	NA	NA	NA	NA	NA	NA	NA
I_1847022	I	1847022	0.543383	Slope	4.05719	0	NA	NA	NA	NA	NA	NA	NA	NA	NA
I_1848097	I	1848097	1.05681	Slope	4.05719	0	NA	NA	NA	NA	NA	NA	NA	NA	NA
I_1857126	I	1857126	0.829394	Slope	4.05719	0	NA	NA	NA	NA	NA	NA	NA	NA	NA
I_1857751	I	1857751	1.22187	Slope	4.05719	0	NA	NA	NA	NA	NA	NA	NA	NA	NA
I_1858273	I	1858273	0.0522428	Slope	4.05719	0	NA	NA	NA	NA	NA	NA	NA	NA	NA
I_1858436	I	1858436	0.853622	Slope	4.05719	0	NA	NA	NA	NA	NA	NA	NA	NA	NA
I_1859641	I	1859641	0.0106223	Slope	4.05719	0	NA	NA	NA	NA	NA	NA	NA	NA	NA
I_1859713	I	1859713	1.26811	Slope	4.05719	0	NA	NA	NA	NA	NA	NA	NA	NA	NA
I_1859820	I	1859820	0.453228	Slope	4.05719	0	NA	NA	NA	NA	NA	NA	NA	NA	NA
I_1860922	I	1860922	0.364008	Slope	4.05719	0	NA	NA	NA	NA	NA	NA	NA	NA	NA
I_1861201	I	1861201	0.795142	Slope	4.05719	0	NA	NA	NA	NA	NA	NA	NA	NA	NA
I_1865859	I	1865859	0.230892	Slope	4.05719	0	NA	NA	NA	NA	NA	NA	NA	NA	NA
I_1873767	I	1873767	0.370088	Slope	4.05719	0	NA	NA	NA	NA	NA	NA	NA	NA	NA
I_1874805	I	1874805	0.682884	Slope	4.05719	0	NA	NA	NA	NA	NA	NA	NA	NA	NA
I_1874811	I	1874811	0.080265	Slope	4.05719	0	NA	NA	NA	NA	NA	NA	NA	NA	NA
I_1875169	I	1875169	0.591719	Slope	4.05719	0	NA	NA	NA	NA	NA	NA	NA	NA	NA
I_1876352	I	1876352	0.0729891	Slope	4.05719	0	NA	NA	NA	NA	NA	NA	NA	NA	NA
I_1876381	I	1876381	0.279925	Slope	4.05719	0	NA	NA	NA	NA	NA	NA	NA	NA	NA
I_1876424	I	1876424	0.797235	Slope	4.05719	0	NA	NA	NA	NA	NA	NA	NA	NA	NA
I_1876789	I	1876789	0.155308	Slope	4.05719	0	NA	NA	NA	NA	NA	NA	NA	NA	NA
I_1876790	I	1876790	0.0446842	Slope	4.05719	0	NA	NA	NA	NA	NA	NA	NA	NA	NA
I_1878171	I	1878171	0.105525	Slope	4.05719	0	NA	NA	NA	NA	NA	NA	NA	NA	NA
I_1878234	I	1878234	0.114937	Slope	4.05719	0	NA	NA	NA	NA	NA	NA	NA	NA	NA
I_1879681	I	1879681	0.0446583	Slope	4.05719	0	NA	NA	NA	NA	NA	NA	NA	NA	NA
I_1880625	I	1880625	0.0898804	Slope	4.05719	0	NA	NA	NA	NA	NA	NA	NA	NA	NA
I_1881811	I	1881811	0.848673	Slope	4.05719	0	NA	NA	NA	NA	NA	NA	NA	NA	NA
I_1882333	I	1882333	0.31692	Slope	4.05719	0	NA	NA	NA	NA	NA	NA	NA	NA	NA
I_1883323	I	1883323	0.506762	Slope	4.05719	0	NA	NA	NA	NA	NA	NA	NA	NA	NA
I_1883531	I	1883531	0.818185	Slope	4.05719	0	NA	NA	NA	NA	NA	NA	NA	NA	NA
I_1884419	I	1884419	1.67983	Slope	4.05719	0	NA	NA	NA	NA	NA	NA	NA	NA	NA
I_1884433	I	1884433	1.10567	Slope	4.05719	0	NA	NA	NA	NA	NA	NA	NA	NA	NA
I_1886503	I	1886503	0.635103	Slope	4.05719	0	NA	NA	NA	NA	NA	NA	NA	NA	NA
I_1886781	I	1886781	1.16638	Slope	4.05719	0	NA	NA	NA	NA	NA	NA	NA	NA	NA
I_1892769	I	1892769	0.370088	Slope	4.05719	0	NA	NA	NA	NA	NA	NA	NA	NA	NA
I_1892869	I	1892869	0.928772	Slope	4.05719	0	NA	NA	NA	NA	NA	NA	NA	NA	NA
I_1894235	I	1894235	1.26811	Slope	4.05719	0	NA	NA	NA	NA	NA	NA	NA	NA	NA
I_1902516	I	1902516	0.204774	Slope	4.05719	0	NA	NA	NA	NA	NA	NA	NA	NA	NA
I_1902811	I	1902811	0.636496	Slope	4.05719	0	NA	NA	NA	NA	NA	NA	NA	NA	NA
I_1907215	I	1907215	0.727083	Slope	4.05719	0	NA	NA	NA	NA	NA	NA	NA	NA	NA
I_1908402	I	1908402	0.436249	Slope	4.05719	0	NA	NA	NA	NA	NA	NA	NA	NA	NA
I_1911965	I	1911965	2.1858	Slope	4.05719	0	NA	NA	NA	NA	NA	NA	NA	NA	NA
I_1915076	I	1915076	0.874304	Slope	4.05719	0	NA	NA	NA	NA	NA	NA	NA	NA	NA
I_1915235	I	1915235	0.122995	Slope	4.05719	0	NA	NA	NA	NA	NA	NA	NA	NA	NA
I_1916382	I	1916382	0.204536	Slope	4.05719	0	NA	NA	NA	NA	NA	NA	NA	NA	NA
I_1916420	I	1916420	0.0364173	Slope	4.05719	0	NA	NA	NA	NA	NA	NA	NA	NA	NA
I_1916797	I	1916797	0.178845	Slope	4.05719	0	NA	NA	NA	NA	NA	NA	NA	NA	NA
I_1917065	I	1917065	0.712149	Slope	4.05719	0	NA	NA	NA	NA	NA	NA	NA	NA	NA
I_1917925	I	1917925	0.791038	Slope	4.05719	0	NA	NA	NA	NA	NA	NA	NA	NA	NA
I_1917960	I	1917960	0.574887	Slope	4.05719	0	NA	NA	NA	NA	NA	NA	NA	NA	NA
I_1918566	I	1918566	0.203601	Slope	4.05719	0	NA	NA	NA	NA	NA	NA	NA	NA	NA
I_1919458	I	1919458	0.160038	Slope	4.05719	0	NA	NA	NA	NA	NA	NA	NA	NA	NA
I_1929645	I	1929645	0.0319177	Slope	4.05719	0	NA	NA	NA	NA	NA	NA	NA	NA	NA
I_1932975	I	1932975	0.282577	Slope	4.05719	0	NA	NA	NA	NA	NA	NA	NA	NA	NA
I_1933111	I	1933111	0.0197892	Slope	4.05719	0	NA	NA	NA	NA	NA	NA	NA	NA	NA
I_1934528	I	1934528	0.520502	Slope	4.05719	0	NA	NA	NA	NA	NA	NA	NA	NA	NA
I_1938599	I	1938599	0.0445811	Slope	4.05719	0	NA	NA	NA	NA	NA	NA	NA	NA	NA
I_1941143	I	1941143	0.519164	Slope	4.05719	0	NA	NA	NA	NA	NA	NA	NA	NA	NA
I_1941366	I	1941366	0.119982	Slope	4.05719	0	NA	NA	NA	NA	NA	NA	NA	NA	NA
I_1942588	I	1942588	1.36795	Slope	4.05719	0	NA	NA	NA	NA	NA	NA	NA	NA	NA
I_1945616	I	1945616	0.587261	Slope	4.05719	0	NA	NA	NA	NA	NA	NA	NA	NA	NA
I_1945928	I	1945928	0.14806	Slope	4.05719	0	NA	NA	NA	NA	NA	NA	NA	NA	NA
I_1947747	I	1947747	0.390139	Slope	4.05719	0	NA	NA	NA	NA	NA	NA	NA	NA	NA
I_1960501	I	1960501	0.949502	Slope	4.05719	0	NA	NA	NA	NA	NA	NA	NA	NA	NA
I_1964735	I	1964735	0.0674887	Slope	4.05719	0	NA	NA	NA	NA	NA	NA	NA	NA	NA
I_1968282	I	1968282	1.09771	Slope	4.05719	0	NA	NA	NA	NA	NA	NA	NA	NA	NA
I_1968774	I	1968774	0.430598	Slope	4.05719	0	NA	NA	NA	NA	NA	NA	NA	NA	NA
I_1972580	I	1972580	0.025868	Slope	4.05719	0	NA	NA	NA	NA	NA	NA	NA	NA	NA
I_1972719	I	1972719	0.132815	Slope	4.05719	0	NA	NA	NA	NA	NA	NA	NA	NA	NA
I_1973720	I	1973720	0.16204	Slope	4.05719	0	NA	NA	NA	NA	NA	NA	NA	NA	NA
I_1973889	I	1973889	0.190944	Slope	4.05719	0	NA	NA	NA	NA	NA	NA	NA	NA	NA
I_1977851	I	1977851	0.150262	Slope	4.05719	0	NA	NA	NA	NA	NA	NA	NA	NA	NA
I_1978169	I	1978169	0.00154142	Slope	4.05719	0	NA	NA	NA	NA	NA	NA	NA	NA	NA
I_1981352	I	1981352	1.00775	Slope	4.05719	0	NA	NA	NA	NA	NA	NA	NA	NA	NA
I_1983282	I	1983282	0.381104	Slope	4.05719	0	NA	NA	NA	NA	NA	NA	NA	NA	NA
I_1983844	I	1983844	0.158151	Slope	4.05719	0	NA	NA	NA	NA	NA	NA	NA	NA	NA
I_1983867	I	1983867	0.0642617	Slope	4.05719	0	NA	NA	NA	NA	NA	NA	NA	NA	NA
I_1984126	I	1984126	0.206271	Slope	4.05719	0	NA	NA	NA	NA	NA	NA	NA	NA	NA
I_1984230	I	1984230	0.25972	Slope	4.05719	0	NA	NA	NA	NA	NA	NA	NA	NA	NA
I_1984419	I	1984419	0.359838	Slope	4.05719	0	NA	NA	NA	NA	NA	NA	NA	NA	NA
I_1985978	I	1985978	0.486814	Slope	4.05719	0	NA	NA	NA	NA	NA	NA	NA	NA	NA
I_1986154	I	1986154	0.601255	Slope	4.05719	0	NA	NA	NA	NA	NA	NA	NA	NA	NA
I_1988317	I	1988317	0.656325	Slope	4.05719	0	NA	NA	NA	NA	NA	NA	NA	NA	NA
I_1988632	I	1988632	0.258937	Slope	4.05719	0	NA	NA	NA	NA	NA	NA	NA	NA	NA
I_1989103	I	1989103	0.394542	Slope	4.05719	0	NA	NA	NA	NA	NA	NA	NA	NA	NA
I_1989106	I	1989106	0.923624	Slope	4.05719	0	NA	NA	NA	NA	NA	NA	NA	NA	NA
I_1991708	I	1991708	0.917441	Slope	4.05719	0	NA	NA	NA	NA	NA	NA	NA	NA	NA
I_1994395	I	1994395	0.339723	Slope	4.05719	0	NA	NA	NA	NA	NA	NA	NA	NA	NA
I_1996799	I	1996799	0.940911	Slope	4.05719	0	NA	NA	NA	NA	NA	NA	NA	NA	NA
I_1996959	I	1996959	1.20462	Slope	4.05719	0	NA	NA	NA	NA	NA	NA	NA	NA	NA
I_1997391	I	1997391	0.370088	Slope	4.05719	0	NA	NA	NA	NA	NA	NA	NA	NA	NA
I_2004909	I	2004909	0.146505	Slope	4.05719	0	NA	NA	NA	NA	NA	NA	NA	NA	NA
I_2005292	I	2005292	1.996	Slope	4.05719	0	NA	NA	NA	NA	NA	NA	NA	NA	NA
I_2007289	I	2007289	0.946004	Slope	4.05719	0	NA	NA	NA	NA	NA	NA	NA	NA	NA
I_2009186	I	2009186	0.605808	Slope	4.05719	0	NA	NA	NA	NA	NA	NA	NA	NA	NA
I_2009926	I	2009926	0.0397704	Slope	4.05719	0	NA	NA	NA	NA	NA	NA	NA	NA	NA
I_2011482	I	2011482	0.0672661	Slope	4.05719	0	NA	NA	NA	NA	NA	NA	NA	NA	NA
I_2012869	I	2012869	0.104599	Slope	4.05719	0	NA	NA	NA	NA	NA	NA	NA	NA	NA
I_2013029	I	2013029	1.08411	Slope	4.05719	0	NA	NA	NA	NA	NA	NA	NA	NA	NA
I_2015535	I	2015535	0.56927	Slope	4.05719	0	NA	NA	NA	NA	NA	NA	NA	NA	NA
I_2016939	I	2016939	0.0771552	Slope	4.05719	0	NA	NA	NA	NA	NA	NA	NA	NA	NA
I_2018575	I	2018575	0.649613	Slope	4.05719	0	NA	NA	NA	NA	NA	NA	NA	NA	NA
I_2018645	I	2018645	1.15088	Slope	4.05719	0	NA	NA	NA	NA	NA	NA	NA	NA	NA
I_2019427	I	2019427	0.370088	Slope	4.05719	0	NA	NA	NA	NA	NA	NA	NA	NA	NA
I_2022956	I	2022956	0.0963694	Slope	4.05719	0	NA	NA	NA	NA	NA	NA	NA	NA	NA
I_2024319	I	2024319	0.874231	Slope	4.05719	0	NA	NA	NA	NA	NA	NA	NA	NA	NA
I_2024909	I	2024909	0.132859	Slope	4.05719	0	NA	NA	NA	NA	NA	NA	NA	NA	NA
I_2025220	I	2025220	0.53865	Slope	4.05719	0	NA	NA	NA	NA	NA	NA	NA	NA	NA
I_2025243	I	2025243	0.946004	Slope	4.05719	0	NA	NA	NA	NA	NA	NA	NA	NA	NA
I_2026730	I	2026730	0.0340052	Slope	4.05719	0	NA	NA	NA	NA	NA	NA	NA	NA	NA
I_2028947	I	2028947	0.0105997	Slope	4.05719	0	NA	NA	NA	NA	NA	NA	NA	NA	NA
I_2029112	I	2029112	0.160855	Slope	4.05719	0	NA	NA	NA	NA	NA	NA	NA	NA	NA
I_2029345	I	2029345	0.508388	Slope	4.05719	0	NA	NA	NA	NA	NA	NA	NA	NA	NA
I_2030068	I	2030068	0.00913814	Slope	4.05719	0	NA	NA	NA	NA	NA	NA	NA	NA	NA
I_2033181	I	2033181	1.11352	Slope	4.05719	0	NA	NA	NA	NA	NA	NA	NA	NA	NA
I_2034490	I	2034490	0.921551	Slope	4.05719	0	NA	NA	NA	NA	NA	NA	NA	NA	NA
I_2060555	I	2060555	0.47906	Slope	4.05719	0	NA	NA	NA	NA	NA	NA	NA	NA	NA
I_2061696	I	2061696	0.178845	Slope	4.05719	0	NA	NA	NA	NA	NA	NA	NA	NA	NA
I_2061840	I	2061840	0.132859	Slope	4.05719	0	NA	NA	NA	NA	NA	NA	NA	NA	NA
I_2062279	I	2062279	1.16265	Slope	4.05719	0	NA	NA	NA	NA	NA	NA	NA	NA	NA
I_2062734	I	2062734	0.00426892	Slope	4.05719	0	NA	NA	NA	NA	NA	NA	NA	NA	NA
I_2066784	I	2066784	0.370088	Slope	4.05719	0	NA	NA	NA	NA	NA	NA	NA	NA	NA
I_2067700	I	2067700	0.278801	Slope	4.05719	0	NA	NA	NA	NA	NA	NA	NA	NA	NA
I_2068166	I	2068166	0.229184	Slope	4.05719	0	NA	NA	NA	NA	NA	NA	NA	NA	NA
I_2071258	I	2071258	1.09771	Slope	4.05719	0	NA	NA	NA	NA	NA	NA	NA	NA	NA
I_2073189	I	2073189	0.0304635	Slope	4.05719	0	NA	NA	NA	NA	NA	NA	NA	NA	NA
I_2075447	I	2075447	0.0471273	Slope	4.05719	0	NA	NA	NA	NA	NA	NA	NA	NA	NA
I_2082931	I	2082931	0.437628	Slope	4.05719	0	NA	NA	NA	NA	NA	NA	NA	NA	NA
I_2085129	I	2085129	0.53835	Slope	4.05719	0	NA	NA	NA	NA	NA	NA	NA	NA	NA
I_2086683	I	2086683	0.130644	Slope	4.05719	0	NA	NA	NA	NA	NA	NA	NA	NA	NA
I_2086842	I	2086842	0.175586	Slope	4.05719	0	NA	NA	NA	NA	NA	NA	NA	NA	NA
I_2088219	I	2088219	0.808587	Slope	4.05719	0	NA	NA	NA	NA	NA	NA	NA	NA	NA
I_2088716	I	2088716	0.47906	Slope	4.05719	0	NA	NA	NA	NA	NA	NA	NA	NA	NA
I_2090527	I	2090527	1.2461	Slope	4.05719	0	NA	NA	NA	NA	NA	NA	NA	NA	NA
I_2092922	I	2092922	0.41285	Slope	4.05719	0	NA	NA	NA	NA	NA	NA	NA	NA	NA
I_2093294	I	2093294	0.469034	Slope	4.05719	0	NA	NA	NA	NA	NA	NA	NA	NA	NA
I_2093341	I	2093341	0.370088	Slope	4.05719	0	NA	NA	NA	NA	NA	NA	NA	NA	NA
I_2094215	I	2094215	0.940911	Slope	4.05719	0	NA	NA	NA	NA	NA	NA	NA	NA	NA
I_2095395	I	2095395	0.521349	Slope	4.05719	0	NA	NA	NA	NA	NA	NA	NA	NA	NA
I_2100488	I	2100488	0.0498382	Slope	4.05719	0	NA	NA	NA	NA	NA	NA	NA	NA	NA
I_2100737	I	2100737	0.132859	Slope	4.05719	0	NA	NA	NA	NA	NA	NA	NA	NA	NA
I_2100840	I	2100840	0.0415555	Slope	4.05719	0	NA	NA	NA	NA	NA	NA	NA	NA	NA
I_2102058	I	2102058	0.0695218	Slope	4.05719	0	NA	NA	NA	NA	NA	NA	NA	NA	NA
I_2102101	I	2102101	0.839914	Slope	4.05719	0	NA	NA	NA	NA	NA	NA	NA	NA	NA
I_2102313	I	2102313	0.231246	Slope	4.05719	0	NA	NA	NA	NA	NA	NA	NA	NA	NA
I_2102496	I	2102496	0.311145	Slope	4.05719	0	NA	NA	NA	NA	NA	NA	NA	NA	NA
I_2108680	I	2108680	0.0854312	Slope	4.05719	0	NA	NA	NA	NA	NA	NA	NA	NA	NA
I_2110467	I	2110467	0.369273	Slope	4.05719	0	NA	NA	NA	NA	NA	NA	NA	NA	NA
I_2110653	I	2110653	0.00426892	Slope	4.05719	0	NA	NA	NA	NA	NA	NA	NA	NA	NA
I_2110681	I	2110681	0.185396	Slope	4.05719	0	NA	NA	NA	NA	NA	NA	NA	NA	NA
I_2111366	I	2111366	0.321881	Slope	4.05719	0	NA	NA	NA	NA	NA	NA	NA	NA	NA
I_2112342	I	2112342	1.70343	Slope	4.05719	0	NA	NA	NA	NA	NA	NA	NA	NA	NA
I_2114053	I	2114053	1.11352	Slope	4.05719	0	NA	NA	NA	NA	NA	NA	NA	NA	NA
I_2115511	I	2115511	0.0539085	Slope	4.05719	0	NA	NA	NA	NA	NA	NA	NA	NA	NA
I_2116239	I	2116239	0.0471273	Slope	4.05719	0	NA	NA	NA	NA	NA	NA	NA	NA	NA
I_2118322	I	2118322	0.500958	Slope	4.05719	0	NA	NA	NA	NA	NA	NA	NA	NA	NA
I_2118471	I	2118471	0.0823041	Slope	4.05719	0	NA	NA	NA	NA	NA	NA	NA	NA	NA
I_2125151	I	2125151	1.10068	Slope	4.05719	0	NA	NA	NA	NA	NA	NA	NA	NA	NA
I_2134803	I	2134803	0.81705	Slope	4.05719	0	NA	NA	NA	NA	NA	NA	NA	NA	NA
I_2138645	I	2138645	0.317902	Slope	4.05719	0	NA	NA	NA	NA	NA	NA	NA	NA	NA
I_2140481	I	2140481	1.66717	Slope	4.05719	0	NA	NA	NA	NA	NA	NA	NA	NA	NA
I_2142174	I	2142174	0.515849	Slope	4.05719	0	NA	NA	NA	NA	NA	NA	NA	NA	NA
I_2143993	I	2143993	0.697628	Slope	4.05719	0	NA	NA	NA	NA	NA	NA	NA	NA	NA
I_2145613	I	2145613	0.0816879	Slope	4.05719	0	NA	NA	NA	NA	NA	NA	NA	NA	NA
I_2152579	I	2152579	2.1286	Slope	4.05719	0	NA	NA	NA	NA	NA	NA	NA	NA	NA
I_2156093	I	2156093	0.888392	Slope	4.05719	0	NA	NA	NA	NA	NA	NA	NA	NA	NA
I_2157010	I	2157010	0.039107	Slope	4.05719	0	NA	NA	NA	NA	NA	NA	NA	NA	NA
I_2160112	I	2160112	0.141627	Slope	4.05719	0	NA	NA	NA	NA	NA	NA	NA	NA	NA
I_2162191	I	2162191	0.265334	Slope	4.05719	0	NA	NA	NA	NA	NA	NA	NA	NA	NA
I_2162237	I	2162237	0.27715	Slope	4.05719	0	NA	NA	NA	NA	NA	NA	NA	NA	NA
I_2162932	I	2162932	0.0481542	Slope	4.05719	0	NA	NA	NA	NA	NA	NA	NA	NA	NA
I_2168301	I	2168301	0.118097	Slope	4.05719	0	NA	NA	NA	NA	NA	NA	NA	NA	NA
I_2168306	I	2168306	0.0160294	Slope	4.05719	0	NA	NA	NA	NA	NA	NA	NA	NA	NA
I_2169861	I	2169861	0.227239	Slope	4.05719	0	NA	NA	NA	NA	NA	NA	NA	NA	NA
I_2170257	I	2170257	1.03651	Slope	4.05719	0	NA	NA	NA	NA	NA	NA	NA	NA	NA
I_2170282	I	2170282	0.0815382	Slope	4.05719	0	NA	NA	NA	NA	NA	NA	NA	NA	NA
I_2170875	I	2170875	1.30193	Slope	4.05719	0	NA	NA	NA	NA	NA	NA	NA	NA	NA
I_2172048	I	2172048	0.573962	Slope	4.05719	0	NA	NA	NA	NA	NA	NA	NA	NA	NA
I_2172612	I	2172612	0.40175	Slope	4.05719	0	NA	NA	NA	NA	NA	NA	NA	NA	NA
I_2173661	I	2173661	0.00767576	Slope	4.05719	0	NA	NA	NA	NA	NA	NA	NA	NA	NA
I_2179331	I	2179331	0.10587	Slope	4.05719	0	NA	NA	NA	NA	NA	NA	NA	NA	NA
I_2179497	I	2179497	0.0546763	Slope	4.05719	0	NA	NA	NA	NA	NA	NA	NA	NA	NA
I_2179569	I	2179569	0.73024	Slope	4.05719	0	NA	NA	NA	NA	NA	NA	NA	NA	NA
I_2180260	I	2180260	1.11352	Slope	4.05719	0	NA	NA	NA	NA	NA	NA	NA	NA	NA
I_2183613	I	2183613	0.106795	Slope	4.05719	0	NA	NA	NA	NA	NA	NA	NA	NA	NA
I_2186078	I	2186078	0.361153	Slope	4.05719	0	NA	NA	NA	NA	NA	NA	NA	NA	NA
I_2186311	I	2186311	1.01408	Slope	4.05719	0	NA	NA	NA	NA	NA	NA	NA	NA	NA
I_2187602	I	2187602	0.0588051	Slope	4.05719	0	NA	NA	NA	NA	NA	NA	NA	NA	NA
I_2190014	I	2190014	1.48224	Slope	4.05719	0	NA	NA	NA	NA	NA	NA	NA	NA	NA
I_2190063	I	2190063	0.130649	Slope	4.05719	0	NA	NA	NA	NA	NA	NA	NA	NA	NA
I_2190874	I	2190874	1.20302	Slope	4.05719	0	NA	NA	NA	NA	NA	NA	NA	NA	NA
I_2190978	I	2190978	1.05398	Slope	4.05719	0	NA	NA	NA	NA	NA	NA	NA	NA	NA
I_2192695	I	2192695	0.751796	Slope	4.05719	0	NA	NA	NA	NA	NA	NA	NA	NA	NA
I_2194171	I	2194171	0.508702	Slope	4.05719	0	NA	NA	NA	NA	NA	NA	NA	NA	NA
I_2198393	I	2198393	0.279152	Slope	4.05719	0	NA	NA	NA	NA	NA	NA	NA	NA	NA
I_2198487	I	2198487	1.08863	Slope	4.05719	0	NA	NA	NA	NA	NA	NA	NA	NA	NA
I_2198927	I	2198927	0.367404	Slope	4.05719	0	NA	NA	NA	NA	NA	NA	NA	NA	NA
I_2199785	I	2199785	0.57391	Slope	4.05719	0	NA	NA	NA	NA	NA	NA	NA	NA	NA
I_2202996	I	2202996	0.170198	Slope	4.05719	0	NA	NA	NA	NA	NA	NA	NA	NA	NA
I_2203415	I	2203415	0.0467456	Slope	4.05719	0	NA	NA	NA	NA	NA	NA	NA	NA	NA
I_2207769	I	2207769	1.36618	Slope	4.05719	0	NA	NA	NA	NA	NA	NA	NA	NA	NA
I_2210363	I	2210363	0.543186	Slope	4.05719	0	NA	NA	NA	NA	NA	NA	NA	NA	NA
I_2210564	I	2210564	1.70343	Slope	4.05719	0	NA	NA	NA	NA	NA	NA	NA	NA	NA
I_2211566	I	2211566	0.227878	Slope	4.05719	0	NA	NA	NA	NA	NA	NA	NA	NA	NA
I_2216296	I	2216296	0.531708	Slope	4.05719	0	NA	NA	NA	NA	NA	NA	NA	NA	NA
I_2219230	I	2219230	0.238119	Slope	4.05719	0	NA	NA	NA	NA	NA	NA	NA	NA	NA
I_2221814	I	2221814	0.0943778	Slope	4.05719	0	NA	NA	NA	NA	NA	NA	NA	NA	NA
I_2224155	I	2224155	0.279152	Slope	4.05719	0	NA	NA	NA	NA	NA	NA	NA	NA	NA
I_2225016	I	2225016	0.062119	Slope	4.05719	0	NA	NA	NA	NA	NA	NA	NA	NA	NA
I_2226458	I	2226458	0.543186	Slope	4.05719	0	NA	NA	NA	NA	NA	NA	NA	NA	NA
I_2226503	I	2226503	1.70343	Slope	4.05719	0	NA	NA	NA	NA	NA	NA	NA	NA	NA
I_2227133	I	2227133	0.178929	Slope	4.05719	0	NA	NA	NA	NA	NA	NA	NA	NA	NA
I_2227629	I	2227629	0.131752	Slope	4.05719	0	NA	NA	NA	NA	NA	NA	NA	NA	NA
I_2228326	I	2228326	0.118097	Slope	4.05719	0	NA	NA	NA	NA	NA	NA	NA	NA	NA
I_2228753	I	2228753	0.674341	Slope	4.05719	0	NA	NA	NA	NA	NA	NA	NA	NA	NA
I_2230008	I	2230008	0.289296	Slope	4.05719	0	NA	NA	NA	NA	NA	NA	NA	NA	NA
I_2230073	I	2230073	1.1956	Slope	4.05719	0	NA	NA	NA	NA	NA	NA	NA	NA	NA
I_2230277	I	2230277	1.7058	Slope	4.05719	0	NA	NA	NA	NA	NA	NA	NA	NA	NA
I_2231151	I	2231151	0.843829	Slope	4.05719	0	NA	NA	NA	NA	NA	NA	NA	NA	NA
I_2231400	I	2231400	0.0752075	Slope	4.05719	0	NA	NA	NA	NA	NA	NA	NA	NA	NA
I_2231772	I	2231772	0.279152	Slope	4.05719	0	NA	NA	NA	NA	NA	NA	NA	NA	NA
I_2234856	I	2234856	0.579303	Slope	4.05719	0	NA	NA	NA	NA	NA	NA	NA	NA	NA
I_2235179	I	2235179	0.167346	Slope	4.05719	0	NA	NA	NA	NA	NA	NA	NA	NA	NA
I_2235244	I	2235244	0.227878	Slope	4.05719	0	NA	NA	NA	NA	NA	NA	NA	NA	NA
I_2236543	I	2236543	0.676641	Slope	4.05719	0	NA	NA	NA	NA	NA	NA	NA	NA	NA
I_2236810	I	2236810	1.70343	Slope	4.05719	0	NA	NA	NA	NA	NA	NA	NA	NA	NA
I_2236901	I	2236901	0.543186	Slope	4.05719	0	NA	NA	NA	NA	NA	NA	NA	NA	NA
I_2237532	I	2237532	0.44931	Slope	4.05719	0	NA	NA	NA	NA	NA	NA	NA	NA	NA
I_2237611	I	2237611	0.062119	Slope	4.05719	0	NA	NA	NA	NA	NA	NA	NA	NA	NA
I_2237686	I	2237686	0.147349	Slope	4.05719	0	NA	NA	NA	NA	NA	NA	NA	NA	NA
I_2239823	I	2239823	0.370088	Slope	4.05719	0	NA	NA	NA	NA	NA	NA	NA	NA	NA
I_2240878	I	2240878	0.381104	Slope	4.05719	0	NA	NA	NA	NA	NA	NA	NA	NA	NA
I_2241952	I	2241952	0.289296	Slope	4.05719	0	NA	NA	NA	NA	NA	NA	NA	NA	NA
I_2243334	I	2243334	0.472769	Slope	4.05719	0	NA	NA	NA	NA	NA	NA	NA	NA	NA
I_2244734	I	2244734	1.9032	Slope	4.05719	0	NA	NA	NA	NA	NA	NA	NA	NA	NA
I_2245087	I	2245087	0.411668	Slope	4.05719	0	NA	NA	NA	NA	NA	NA	NA	NA	NA
I_2247498	I	2247498	0.230412	Slope	4.05719	0	NA	NA	NA	NA	NA	NA	NA	NA	NA
I_2249122	I	2249122	0.158151	Slope	4.05719	0	NA	NA	NA	NA	NA	NA	NA	NA	NA
I_2257541	I	2257541	0.178275	Slope	4.05719	0	NA	NA	NA	NA	NA	NA	NA	NA	NA
I_2260201	I	2260201	0.212132	Slope	4.05719	0	NA	NA	NA	NA	NA	NA	NA	NA	NA
I_2260930	I	2260930	0.370088	Slope	4.05719	0	NA	NA	NA	NA	NA	NA	NA	NA	NA
I_2261475	I	2261475	0.0471273	Slope	4.05719	0	NA	NA	NA	NA	NA	NA	NA	NA	NA
I_2262539	I	2262539	0.0121701	Slope	4.05719	0	NA	NA	NA	NA	NA	NA	NA	NA	NA
I_2264408	I	2264408	0.381104	Slope	4.05719	0	NA	NA	NA	NA	NA	NA	NA	NA	NA
I_2265598	I	2265598	0.100488	Slope	4.05719	0	NA	NA	NA	NA	NA	NA	NA	NA	NA
I_2265955	I	2265955	0.178929	Slope	4.05719	0	NA	NA	NA	NA	NA	NA	NA	NA	NA
I_2269627	I	2269627	0.636496	Slope	4.05719	0	NA	NA	NA	NA	NA	NA	NA	NA	NA
I_2270286	I	2270286	0.230412	Slope	4.05719	0	NA	NA	NA	NA	NA	NA	NA	NA	NA
I_2270643	I	2270643	0.869136	Slope	4.05719	0	NA	NA	NA	NA	NA	NA	NA	NA	NA
I_2271369	I	2271369	0.446771	Slope	4.05719	0	NA	NA	NA	NA	NA	NA	NA	NA	NA
I_2273828	I	2273828	0.501808	Slope	4.05719	0	NA	NA	NA	NA	NA	NA	NA	NA	NA
I_2273911	I	2273911	0.325713	Slope	4.05719	0	NA	NA	NA	NA	NA	NA	NA	NA	NA
I_2276500	I	2276500	0.217572	Slope	4.05719	0	NA	NA	NA	NA	NA	NA	NA	NA	NA
I_2278049	I	2278049	0.0471273	Slope	4.05719	0	NA	NA	NA	NA	NA	NA	NA	NA	NA
I_2280193	I	2280193	0.178929	Slope	4.05719	0	NA	NA	NA	NA	NA	NA	NA	NA	NA
I_2282245	I	2282245	0.303607	Slope	4.05719	0	NA	NA	NA	NA	NA	NA	NA	NA	NA
I_2282340	I	2282340	0.152077	Slope	4.05719	0	NA	NA	NA	NA	NA	NA	NA	NA	NA
I_2284924	I	2284924	0.627322	Slope	4.05719	0	NA	NA	NA	NA	NA	NA	NA	NA	NA
I_2284930	I	2284930	0.375681	Slope	4.05719	0	NA	NA	NA	NA	NA	NA	NA	NA	NA
I_2291600	I	2291600	1.09771	Slope	4.05719	0	NA	NA	NA	NA	NA	NA	NA	NA	NA
I_2295276	I	2295276	0.183355	Slope	4.05719	0	NA	NA	NA	NA	NA	NA	NA	NA	NA
I_2297636	I	2297636	0.184644	Slope	4.05719	0	NA	NA	NA	NA	NA	NA	NA	NA	NA
I_2297746	I	2297746	0.3267	Slope	4.05719	0	NA	NA	NA	NA	NA	NA	NA	NA	NA
I_2298778	I	2298778	0.253577	Slope	4.05719	0	NA	NA	NA	NA	NA	NA	NA	NA	NA
I_2299656	I	2299656	0.178275	Slope	4.05719	0	NA	NA	NA	NA	NA	NA	NA	NA	NA
I_2299738	I	2299738	0.331957	Slope	4.05719	0	NA	NA	NA	NA	NA	NA	NA	NA	NA
I_2307149	I	2307149	0.370088	Slope	4.05719	0	NA	NA	NA	NA	NA	NA	NA	NA	NA
I_2309623	I	2309623	0.066177	Slope	4.05719	0	NA	NA	NA	NA	NA	NA	NA	NA	NA
I_2310074	I	2310074	0.0381756	Slope	4.05719	0	NA	NA	NA	NA	NA	NA	NA	NA	NA
I_2310939	I	2310939	0.0471273	Slope	4.05719	0	NA	NA	NA	NA	NA	NA	NA	NA	NA
I_2312242	I	2312242	0.178929	Slope	4.05719	0	NA	NA	NA	NA	NA	NA	NA	NA	NA
I_2312495	I	2312495	0.627322	Slope	4.05719	0	NA	NA	NA	NA	NA	NA	NA	NA	NA
I_2312629	I	2312629	0.0916139	Slope	4.05719	0	NA	NA	NA	NA	NA	NA	NA	NA	NA
I_2315608	I	2315608	0.184644	Slope	4.05719	0	NA	NA	NA	NA	NA	NA	NA	NA	NA
I_2317195	I	2317195	1.09771	Slope	4.05719	0	NA	NA	NA	NA	NA	NA	NA	NA	NA
I_2317426	I	2317426	0.636496	Slope	4.05719	0	NA	NA	NA	NA	NA	NA	NA	NA	NA
I_2323298	I	2323298	0.991819	Slope	4.05719	0	NA	NA	NA	NA	NA	NA	NA	NA	NA
I_2324039	I	2324039	1.64995	Slope	4.05719	0	NA	NA	NA	NA	NA	NA	NA	NA	NA
I_2324491	I	2324491	0.210148	Slope	4.05719	0	NA	NA	NA	NA	NA	NA	NA	NA	NA
I_2325022	I	2325022	0.142463	Slope	4.05719	0	NA	NA	NA	NA	NA	NA	NA	NA	NA
I_2325367	I	2325367	0.0471273	Slope	4.05719	0	NA	NA	NA	NA	NA	NA	NA	NA	NA
I_2329102	I	2329102	0.0449689	Slope	4.05719	0	NA	NA	NA	NA	NA	NA	NA	NA	NA
I_2329917	I	2329917	0.184644	Slope	4.05719	0	NA	NA	NA	NA	NA	NA	NA	NA	NA
I_2330498	I	2330498	0.627322	Slope	4.05719	0	NA	NA	NA	NA	NA	NA	NA	NA	NA
I_2330986	I	2330986	0.92454	Slope	4.05719	0	NA	NA	NA	NA	NA	NA	NA	NA	NA
I_2333162	I	2333162	0.0626973	Slope	4.05719	0	NA	NA	NA	NA	NA	NA	NA	NA	NA
I_2333917	I	2333917	0.00424399	Slope	4.05719	0	NA	NA	NA	NA	NA	NA	NA	NA	NA
I_2337494	I	2337494	0.0626973	Slope	4.05719	0	NA	NA	NA	NA	NA	NA	NA	NA	NA
I_2357768	I	2357768	0.590556	Slope	4.05719	0	NA	NA	NA	NA	NA	NA	NA	NA	NA
I_2359896	I	2359896	0.617485	Slope	4.05719	0	NA	NA	NA	NA	NA	NA	NA	NA	NA
I_2359948	I	2359948	0.454401	Slope	4.05719	0	NA	NA	NA	NA	NA	NA	NA	NA	NA
I_2359992	I	2359992	0.184644	Slope	4.05719	0	NA	NA	NA	NA	NA	NA	NA	NA	NA
I_2369248	I	2369248	0.0471273	Slope	4.05719	0	NA	NA	NA	NA	NA	NA	NA	NA	NA
I_2370581	I	2370581	0.0474992	Slope	4.05719	0	NA	NA	NA	NA	NA	NA	NA	NA	NA
I_2373940	I	2373940	0.475862	Slope	4.05719	0	NA	NA	NA	NA	NA	NA	NA	NA	NA
I_2374176	I	2374176	0.367441	Slope	4.05719	0	NA	NA	NA	NA	NA	NA	NA	NA	NA
I_2375574	I	2375574	0.0581149	Slope	4.05719	0	NA	NA	NA	NA	NA	NA	NA	NA	NA
I_2384912	I	2384912	0.729719	Slope	4.05719	0	NA	NA	NA	NA	NA	NA	NA	NA	NA
I_2386021	I	2386021	0.738523	Slope	4.05719	0	NA	NA	NA	NA	NA	NA	NA	NA	NA
I_2386041	I	2386041	0.518871	Slope	4.05719	0	NA	NA	NA	NA	NA	NA	NA	NA	NA
I_2386469	I	2386469	1.20406	Slope	4.05719	0	NA	NA	NA	NA	NA	NA	NA	NA	NA
I_2386495	I	2386495	0.708941	Slope	4.05719	0	NA	NA	NA	NA	NA	NA	NA	NA	NA
I_2386545	I	2386545	0.0916139	Slope	4.05719	0	NA	NA	NA	NA	NA	NA	NA	NA	NA
I_2387555	I	2387555	0.310573	Slope	4.05719	0	NA	NA	NA	NA	NA	NA	NA	NA	NA
I_2390689	I	2390689	0.14882	Slope	4.05719	0	NA	NA	NA	NA	NA	NA	NA	NA	NA
I_2391083	I	2391083	0.594553	Slope	4.05719	0	NA	NA	NA	NA	NA	NA	NA	NA	NA
I_2393626	I	2393626	0.2177	Slope	4.05719	0	NA	NA	NA	NA	NA	NA	NA	NA	NA
I_2393645	I	2393645	0.230292	Slope	4.05719	0	NA	NA	NA	NA	NA	NA	NA	NA	NA
I_2393726	I	2393726	0.066177	Slope	4.05719	0	NA	NA	NA	NA	NA	NA	NA	NA	NA
I_2394565	I	2394565	0.652485	Slope	4.05719	0	NA	NA	NA	NA	NA	NA	NA	NA	NA
I_2396163	I	2396163	0.353009	Slope	4.05719	0	NA	NA	NA	NA	NA	NA	NA	NA	NA
I_2402433	I	2402433	0.0379698	Slope	4.05719	0	NA	NA	NA	NA	NA	NA	NA	NA	NA
I_2402512	I	2402512	0.322301	Slope	4.05719	0	NA	NA	NA	NA	NA	NA	NA	NA	NA
I_2403348	I	2403348	0.0562293	Slope	4.05719	0	NA	NA	NA	NA	NA	NA	NA	NA	NA
I_2404637	I	2404637	0.0468703	Slope	4.05719	0	NA	NA	NA	NA	NA	NA	NA	NA	NA
I_2405043	I	2405043	0.155019	Slope	4.05719	0	NA	NA	NA	NA	NA	NA	NA	NA	NA
I_2406650	I	2406650	0.450682	Slope	4.05719	0	NA	NA	NA	NA	NA	NA	NA	NA	NA
I_2407972	I	2407972	0.0355982	Slope	4.05719	0	NA	NA	NA	NA	NA	NA	NA	NA	NA
I_2408324	I	2408324	0.197408	Slope	4.05719	0	NA	NA	NA	NA	NA	NA	NA	NA	NA
I_2408396	I	2408396	0.182115	Slope	4.05719	0	NA	NA	NA	NA	NA	NA	NA	NA	NA
I_2409508	I	2409508	0.613104	Slope	4.05719	0	NA	NA	NA	NA	NA	NA	NA	NA	NA
I_2409636	I	2409636	0.294251	Slope	4.05719	0	NA	NA	NA	NA	NA	NA	NA	NA	NA
I_2410306	I	2410306	1.05911	Slope	4.05719	0	NA	NA	NA	NA	NA	NA	NA	NA	NA
I_2410324	I	2410324	1.09743	Slope	4.05719	0	NA	NA	NA	NA	NA	NA	NA	NA	NA
I_2412428	I	2412428	0.84136	Slope	4.05719	0	NA	NA	NA	NA	NA	NA	NA	NA	NA
I_2414561	I	2414561	0.0703482	Slope	4.05719	0	NA	NA	NA	NA	NA	NA	NA	NA	NA
I_2415014	I	2415014	0.513529	Slope	4.05719	0	NA	NA	NA	NA	NA	NA	NA	NA	NA
I_2415078	I	2415078	0.251384	Slope	4.05719	0	NA	NA	NA	NA	NA	NA	NA	NA	NA
I_2415282	I	2415282	0.182115	Slope	4.05719	0	NA	NA	NA	NA	NA	NA	NA	NA	NA
I_2415818	I	2415818	0.538363	Slope	4.05719	0	NA	NA	NA	NA	NA	NA	NA	NA	NA
I_2416262	I	2416262	0.613104	Slope	4.05719	0	NA	NA	NA	NA	NA	NA	NA	NA	NA
I_2417308	I	2417308	0.322301	Slope	4.05719	0	NA	NA	NA	NA	NA	NA	NA	NA	NA
I_2417487	I	2417487	0.227447	Slope	4.05719	0	NA	NA	NA	NA	NA	NA	NA	NA	NA
I_2417891	I	2417891	0.0360127	Slope	4.05719	0	NA	NA	NA	NA	NA	NA	NA	NA	NA
I_2418015	I	2418015	0.223597	Slope	4.05719	0	NA	NA	NA	NA	NA	NA	NA	NA	NA
I_2421753	I	2421753	0.762945	Slope	4.05719	0	NA	NA	NA	NA	NA	NA	NA	NA	NA
I_2421818	I	2421818	0.388376	Slope	4.05719	0	NA	NA	NA	NA	NA	NA	NA	NA	NA
I_2421954	I	2421954	0.0471273	Slope	4.05719	0	NA	NA	NA	NA	NA	NA	NA	NA	NA
I_2423687	I	2423687	0.538363	Slope	4.05719	0	NA	NA	NA	NA	NA	NA	NA	NA	NA
I_2429630	I	2429630	0.665194	Slope	4.05719	0	NA	NA	NA	NA	NA	NA	NA	NA	NA
I_2433505	I	2433505	0.182115	Slope	4.05719	0	NA	NA	NA	NA	NA	NA	NA	NA	NA
I_2433866	I	2433866	0.015475	Slope	4.05719	0	NA	NA	NA	NA	NA	NA	NA	NA	NA
I_2434057	I	2434057	0.757379	Slope	4.05719	0	NA	NA	NA	NA	NA	NA	NA	NA	NA
I_2435519	I	2435519	0.394084	Slope	4.05719	0	NA	NA	NA	NA	NA	NA	NA	NA	NA
I_2435521	I	2435521	0.585668	Slope	4.05719	0	NA	NA	NA	NA	NA	NA	NA	NA	NA
I_2435522	I	2435522	0.0735533	Slope	4.05719	0	NA	NA	NA	NA	NA	NA	NA	NA	NA
I_2437731	I	2437731	0.0753376	Slope	4.05719	0	NA	NA	NA	NA	NA	NA	NA	NA	NA
I_2438827	I	2438827	0.000395374	Slope	4.05719	0	NA	NA	NA	NA	NA	NA	NA	NA	NA
I_2438949	I	2438949	0.0471273	Slope	4.05719	0	NA	NA	NA	NA	NA	NA	NA	NA	NA
I_2440923	I	2440923	0.0922862	Slope	4.05719	0	NA	NA	NA	NA	NA	NA	NA	NA	NA
I_2441030	I	2441030	0.780884	Slope	4.05719	0	NA	NA	NA	NA	NA	NA	NA	NA	NA
I_2441151	I	2441151	0.225988	Slope	4.05719	0	NA	NA	NA	NA	NA	NA	NA	NA	NA
I_2442877	I	2442877	0.104726	Slope	4.05719	0	NA	NA	NA	NA	NA	NA	NA	NA	NA
I_2443787	I	2443787	0.015475	Slope	4.05719	0	NA	NA	NA	NA	NA	NA	NA	NA	NA
I_2444452	I	2444452	0.182115	Slope	4.05719	0	NA	NA	NA	NA	NA	NA	NA	NA	NA
I_2446003	I	2446003	0.177689	Slope	4.05719	0	NA	NA	NA	NA	NA	NA	NA	NA	NA
I_2447232	I	2447232	0.185572	Slope	4.05719	0	NA	NA	NA	NA	NA	NA	NA	NA	NA
I_2447922	I	2447922	0.980851	Slope	4.05719	0	NA	NA	NA	NA	NA	NA	NA	NA	NA
I_2448780	I	2448780	0.757379	Slope	4.05719	0	NA	NA	NA	NA	NA	NA	NA	NA	NA
I_2451164	I	2451164	0.299334	Slope	4.05719	0	NA	NA	NA	NA	NA	NA	NA	NA	NA
I_2452509	I	2452509	0.229739	Slope	4.05719	0	NA	NA	NA	NA	NA	NA	NA	NA	NA
I_2452512	I	2452512	0.178511	Slope	4.05719	0	NA	NA	NA	NA	NA	NA	NA	NA	NA
I_2452928	I	2452928	0.012454	Slope	4.05719	0	NA	NA	NA	NA	NA	NA	NA	NA	NA
I_2454099	I	2454099	0.278831	Slope	4.05719	0	NA	NA	NA	NA	NA	NA	NA	NA	NA
I_2455991	I	2455991	0.352196	Slope	4.05719	0	NA	NA	NA	NA	NA	NA	NA	NA	NA
I_2457298	I	2457298	0.955332	Slope	4.05719	0	NA	NA	NA	NA	NA	NA	NA	NA	NA
I_2457582	I	2457582	1.8565	Slope	4.05719	0	NA	NA	NA	NA	NA	NA	NA	NA	NA
I_2459636	I	2459636	0.769208	Slope	4.05719	0	NA	NA	NA	NA	NA	NA	NA	NA	NA
I_2461358	I	2461358	0.0456779	Slope	4.05719	0	NA	NA	NA	NA	NA	NA	NA	NA	NA
I_2463037	I	2463037	0.510629	Slope	4.05719	0	NA	NA	NA	NA	NA	NA	NA	NA	NA
I_2463277	I	2463277	0.494208	Slope	4.05719	0	NA	NA	NA	NA	NA	NA	NA	NA	NA
I_2474138	I	2474138	0.482044	Slope	4.05719	0	NA	NA	NA	NA	NA	NA	NA	NA	NA
I_2474219	I	2474219	0.243454	Slope	4.05719	0	NA	NA	NA	NA	NA	NA	NA	NA	NA
I_2475864	I	2475864	0.168341	Slope	4.05719	0	NA	NA	NA	NA	NA	NA	NA	NA	NA
I_2481312	I	2481312	0.0276459	Slope	4.05719	0	NA	NA	NA	NA	NA	NA	NA	NA	NA
I_2485346	I	2485346	0.0896429	Slope	4.05719	0	NA	NA	NA	NA	NA	NA	NA	NA	NA
I_2485628	I	2485628	0.367912	Slope	4.05719	0	NA	NA	NA	NA	NA	NA	NA	NA	NA
I_2488352	I	2488352	0.776461	Slope	4.05719	0	NA	NA	NA	NA	NA	NA	NA	NA	NA
I_2491553	I	2491553	0.394312	Slope	4.05719	0	NA	NA	NA	NA	NA	NA	NA	NA	NA
I_2492844	I	2492844	0.465062	Slope	4.05719	0	NA	NA	NA	NA	NA	NA	NA	NA	NA
I_2495382	I	2495382	0.0178869	Slope	4.05719	0	NA	NA	NA	NA	NA	NA	NA	NA	NA
I_2499719	I	2499719	0.384386	Slope	4.05719	0	NA	NA	NA	NA	NA	NA	NA	NA	NA
I_2499835	I	2499835	1.49105	Slope	4.05719	0	NA	NA	NA	NA	NA	NA	NA	NA	NA
I_2499909	I	2499909	0.0643821	Slope	4.05719	0	NA	NA	NA	NA	NA	NA	NA	NA	NA
I_2500102	I	2500102	1.22331	Slope	4.05719	0	NA	NA	NA	NA	NA	NA	NA	NA	NA
I_2502049	I	2502049	0.111709	Slope	4.05719	0	NA	NA	NA	NA	NA	NA	NA	NA	NA
I_2502497	I	2502497	0.273163	Slope	4.05719	0	NA	NA	NA	NA	NA	NA	NA	NA	NA
I_2502501	I	2502501	0.234213	Slope	4.05719	0	NA	NA	NA	NA	NA	NA	NA	NA	NA
I_2504331	I	2504331	0.818984	Slope	4.05719	0	NA	NA	NA	NA	NA	NA	NA	NA	NA
I_2505659	I	2505659	0.338885	Slope	4.05719	0	NA	NA	NA	NA	NA	NA	NA	NA	NA
I_2506406	I	2506406	0.677593	Slope	4.05719	0	NA	NA	NA	NA	NA	NA	NA	NA	NA
I_2506559	I	2506559	1.51864	Slope	4.05719	0	NA	NA	NA	NA	NA	NA	NA	NA	NA
I_2506636	I	2506636	2.13322	Slope	4.05719	0	NA	NA	NA	NA	NA	NA	NA	NA	NA
I_2508199	I	2508199	0.0906318	Slope	4.05719	0	NA	NA	NA	NA	NA	NA	NA	NA	NA
I_2513879	I	2513879	0.107594	Slope	4.05719	0	NA	NA	NA	NA	NA	NA	NA	NA	NA
I_2514546	I	2514546	0.0922599	Slope	4.05719	0	NA	NA	NA	NA	NA	NA	NA	NA	NA
I_2515032	I	2515032	0.0456779	Slope	4.05719	0	NA	NA	NA	NA	NA	NA	NA	NA	NA
I_2515738	I	2515738	1.47098	Slope	4.05719	0	NA	NA	NA	NA	NA	NA	NA	NA	NA
I_2520074	I	2520074	0.305275	Slope	4.05719	0	NA	NA	NA	NA	NA	NA	NA	NA	NA
I_2522142	I	2522142	0.278081	Slope	4.05719	0	NA	NA	NA	NA	NA	NA	NA	NA	NA
I_2525398	I	2525398	1.90074	Slope	4.05719	0	NA	NA	NA	NA	NA	NA	NA	NA	NA
I_2526193	I	2526193	0.960879	Slope	4.05719	0	NA	NA	NA	NA	NA	NA	NA	NA	NA
I_2527407	I	2527407	1.1326	Slope	4.05719	0	NA	NA	NA	NA	NA	NA	NA	NA	NA
I_2529627	I	2529627	1.37488	Slope	4.05719	0	NA	NA	NA	NA	NA	NA	NA	NA	NA
I_2529719	I	2529719	0.0357417	Slope	4.05719	0	NA	NA	NA	NA	NA	NA	NA	NA	NA
I_2530227	I	2530227	0.151951	Slope	4.05719	0	NA	NA	NA	NA	NA	NA	NA	NA	NA
I_2531089	I	2531089	0.213411	Slope	4.05719	0	NA	NA	NA	NA	NA	NA	NA	NA	NA
I_2533987	I	2533987	0.31137	Slope	4.05719	0	NA	NA	NA	NA	NA	NA	NA	NA	NA
I_2534039	I	2534039	0.947466	Slope	4.05719	0	NA	NA	NA	NA	NA	NA	NA	NA	NA
I_2534153	I	2534153	0.256997	Slope	4.05719	0	NA	NA	NA	NA	NA	NA	NA	NA	NA
I_2535188	I	2535188	0.281097	Slope	4.05719	0	NA	NA	NA	NA	NA	NA	NA	NA	NA
I_2535189	I	2535189	1.04736	Slope	4.05719	0	NA	NA	NA	NA	NA	NA	NA	NA	NA
I_2535580	I	2535580	0.107594	Slope	4.05719	0	NA	NA	NA	NA	NA	NA	NA	NA	NA
I_2535596	I	2535596	0.375296	Slope	4.05719	0	NA	NA	NA	NA	NA	NA	NA	NA	NA
I_2535798	I	2535798	0.250709	Slope	4.05719	0	NA	NA	NA	NA	NA	NA	NA	NA	NA
I_2536314	I	2536314	0.217901	Slope	4.05719	0	NA	NA	NA	NA	NA	NA	NA	NA	NA
I_2536410	I	2536410	1.46047	Slope	4.05719	0	NA	NA	NA	NA	NA	NA	NA	NA	NA
I_2539144	I	2539144	2.01042	Slope	4.05719	0	NA	NA	NA	NA	NA	NA	NA	NA	NA
I_2539595	I	2539595	0.891361	Slope	4.05719	0	NA	NA	NA	NA	NA	NA	NA	NA	NA
I_2539856	I	2539856	0.728256	Slope	4.05719	0	NA	NA	NA	NA	NA	NA	NA	NA	NA
I_2541680	I	2541680	0.213411	Slope	4.05719	0	NA	NA	NA	NA	NA	NA	NA	NA	NA
I_2545444	I	2545444	1.20144	Slope	4.05719	0	NA	NA	NA	NA	NA	NA	NA	NA	NA
I_2545533	I	2545533	0.875247	Slope	4.05719	0	NA	NA	NA	NA	NA	NA	NA	NA	NA
I_2546154	I	2546154	0.423183	Slope	4.05719	0	NA	NA	NA	NA	NA	NA	NA	NA	NA
I_2547344	I	2547344	0.107594	Slope	4.05719	0	NA	NA	NA	NA	NA	NA	NA	NA	NA
I_2548402	I	2548402	1.5315	Slope	4.05719	0	NA	NA	NA	NA	NA	NA	NA	NA	NA
I_2548408	I	2548408	1.62961	Slope	4.05719	0	NA	NA	NA	NA	NA	NA	NA	NA	NA
I_2550196	I	2550196	0.113232	Slope	4.05719	0	NA	NA	NA	NA	NA	NA	NA	NA	NA
I_2551409	I	2551409	1.01521	Slope	4.05719	0	NA	NA	NA	NA	NA	NA	NA	NA	NA
I_2551534	I	2551534	0.703948	Slope	4.05719	0	NA	NA	NA	NA	NA	NA	NA	NA	NA
I_2555109	I	2555109	0.213411	Slope	4.05719	0	NA	NA	NA	NA	NA	NA	NA	NA	NA
I_2556208	I	2556208	0.110042	Slope	4.05719	0	NA	NA	NA	NA	NA	NA	NA	NA	NA
I_2556319	I	2556319	0.0164149	Slope	4.05719	0	NA	NA	NA	NA	NA	NA	NA	NA	NA
I_2558498	I	2558498	0.107594	Slope	4.05719	0	NA	NA	NA	NA	NA	NA	NA	NA	NA
I_2558789	I	2558789	0.910887	Slope	4.05719	0	NA	NA	NA	NA	NA	NA	NA	NA	NA
I_2558804	I	2558804	0.113232	Slope	4.05719	0	NA	NA	NA	NA	NA	NA	NA	NA	NA
I_2560442	I	2560442	1.55399	Slope	4.05719	0	NA	NA	NA	NA	NA	NA	NA	NA	NA
I_2561005	I	2561005	0.107594	Slope	4.05719	0	NA	NA	NA	NA	NA	NA	NA	NA	NA
I_2561261	I	2561261	0.942805	Slope	4.05719	0	NA	NA	NA	NA	NA	NA	NA	NA	NA
I_2561952	I	2561952	0.285285	Slope	4.05719	0	NA	NA	NA	NA	NA	NA	NA	NA	NA
I_2561962	I	2561962	1.08412	Slope	4.05719	0	NA	NA	NA	NA	NA	NA	NA	NA	NA
I_2562473	I	2562473	0.217901	Slope	4.05719	0	NA	NA	NA	NA	NA	NA	NA	NA	NA
I_2562521	I	2562521	0.635975	Slope	4.05719	0	NA	NA	NA	NA	NA	NA	NA	NA	NA
I_2562557	I	2562557	0.213411	Slope	4.05719	0	NA	NA	NA	NA	NA	NA	NA	NA	NA
I_2562945	I	2562945	0.892081	Slope	4.05719	0	NA	NA	NA	NA	NA	NA	NA	NA	NA
I_2563206	I	2563206	1.04937	Slope	4.05719	0	NA	NA	NA	NA	NA	NA	NA	NA	NA
I_2563869	I	2563869	0.158151	Slope	4.05719	0	NA	NA	NA	NA	NA	NA	NA	NA	NA
I_2564783	I	2564783	0.107594	Slope	4.05719	0	NA	NA	NA	NA	NA	NA	NA	NA	NA
I_2565493	I	2565493	0.388437	Slope	4.05719	0	NA	NA	NA	NA	NA	NA	NA	NA	NA
I_2566152	I	2566152	0.22948	Slope	4.05719	0	NA	NA	NA	NA	NA	NA	NA	NA	NA
I_2568037	I	2568037	0.690392	Slope	4.05719	0	NA	NA	NA	NA	NA	NA	NA	NA	NA
I_2568366	I	2568366	0.217901	Slope	4.05719	0	NA	NA	NA	NA	NA	NA	NA	NA	NA
I_2569086	I	2569086	0.327612	Slope	4.05719	0	NA	NA	NA	NA	NA	NA	NA	NA	NA
I_2569672	I	2569672	0.065011	Slope	4.05719	0	NA	NA	NA	NA	NA	NA	NA	NA	NA
I_2571357	I	2571357	2.00514	Slope	4.05719	0	NA	NA	NA	NA	NA	NA	NA	NA	NA
I_2571407	I	2571407	0.213411	Slope	4.05719	0	NA	NA	NA	NA	NA	NA	NA	NA	NA
I_2571411	I	2571411	0.61162	Slope	4.05719	0	NA	NA	NA	NA	NA	NA	NA	NA	NA
I_2571723	I	2571723	0.722514	Slope	4.05719	0	NA	NA	NA	NA	NA	NA	NA	NA	NA
I_2572477	I	2572477	1.30641	Slope	4.05719	0	NA	NA	NA	NA	NA	NA	NA	NA	NA
I_2572992	I	2572992	0.556672	Slope	4.05719	0	NA	NA	NA	NA	NA	NA	NA	NA	NA
I_2576408	I	2576408	0.107594	Slope	4.05719	0	NA	NA	NA	NA	NA	NA	NA	NA	NA
I_2577499	I	2577499	0.944674	Slope	4.05719	0	NA	NA	NA	NA	NA	NA	NA	NA	NA
I_2578497	I	2578497	0.616209	Slope	4.05719	0	NA	NA	NA	NA	NA	NA	NA	NA	NA
I_2579235	I	2579235	0.0268615	Slope	4.05719	0	NA	NA	NA	NA	NA	NA	NA	NA	NA
I_2579871	I	2579871	0.213411	Slope	4.05719	0	NA	NA	NA	NA	NA	NA	NA	NA	NA
I_2580256	I	2580256	0.556672	Slope	4.05719	0	NA	NA	NA	NA	NA	NA	NA	NA	NA
I_2582707	I	2582707	0.00962324	Slope	4.05719	0	NA	NA	NA	NA	NA	NA	NA	NA	NA
I_2584669	I	2584669	1.3542	Slope	4.05719	0	NA	NA	NA	NA	NA	NA	NA	NA	NA
I_2586672	I	2586672	0.141987	Slope	4.05719	0	NA	NA	NA	NA	NA	NA	NA	NA	NA
I_2587176	I	2587176	0.511279	Slope	4.05719	0	NA	NA	NA	NA	NA	NA	NA	NA	NA
I_2587205	I	2587205	0.751387	Slope	4.05719	0	NA	NA	NA	NA	NA	NA	NA	NA	NA
I_2587285	I	2587285	0.207884	Slope	4.05719	0	NA	NA	NA	NA	NA	NA	NA	NA	NA
I_2588623	I	2588623	0.477581	Slope	4.05719	0	NA	NA	NA	NA	NA	NA	NA	NA	NA
I_2588704	I	2588704	0.544731	Slope	4.05719	0	NA	NA	NA	NA	NA	NA	NA	NA	NA
I_2591424	I	2591424	0.99324	Slope	4.05719	0	NA	NA	NA	NA	NA	NA	NA	NA	NA
I_2591521	I	2591521	1.10052	Slope	4.05719	0	NA	NA	NA	NA	NA	NA	NA	NA	NA
I_2591578	I	2591578	0.116572	Slope	4.05719	0	NA	NA	NA	NA	NA	NA	NA	NA	NA
I_2592355	I	2592355	0.0140986	Slope	4.05719	0	NA	NA	NA	NA	NA	NA	NA	NA	NA
I_2593364	I	2593364	0.0967609	Slope	4.05719	0	NA	NA	NA	NA	NA	NA	NA	NA	NA
I_2593422	I	2593422	0.0559807	Slope	4.05719	0	NA	NA	NA	NA	NA	NA	NA	NA	NA
I_2594023	I	2594023	0.656942	Slope	4.05719	0	NA	NA	NA	NA	NA	NA	NA	NA	NA
I_2594098	I	2594098	0.170361	Slope	4.05719	0	NA	NA	NA	NA	NA	NA	NA	NA	NA
I_2594661	I	2594661	0.540583	Slope	4.05719	0	NA	NA	NA	NA	NA	NA	NA	NA	NA
I_2594698	I	2594698	0.0205386	Slope	4.05719	0	NA	NA	NA	NA	NA	NA	NA	NA	NA
I_2601493	I	2601493	0.0797938	Slope	4.05719	0	NA	NA	NA	NA	NA	NA	NA	NA	NA
I_2602327	I	2602327	0.184378	Slope	4.05719	0	NA	NA	NA	NA	NA	NA	NA	NA	NA
I_2603764	I	2603764	0.142797	Slope	4.05719	0	NA	NA	NA	NA	NA	NA	NA	NA	NA
I_2603769	I	2603769	1.08411	Slope	4.05719	0	NA	NA	NA	NA	NA	NA	NA	NA	NA
I_2604074	I	2604074	0.427135	Slope	4.05719	0	NA	NA	NA	NA	NA	NA	NA	NA	NA
I_2604212	I	2604212	0.494745	Slope	4.05719	0	NA	NA	NA	NA	NA	NA	NA	NA	NA
I_2607200	I	2607200	0.170107	Slope	4.05719	0	NA	NA	NA	NA	NA	NA	NA	NA	NA
I_2608323	I	2608323	0.422048	Slope	4.05719	0	NA	NA	NA	NA	NA	NA	NA	NA	NA
I_2608857	I	2608857	0.176941	Slope	4.05719	0	NA	NA	NA	NA	NA	NA	NA	NA	NA
I_2613141	I	2613141	0.310143	Slope	4.05719	0	NA	NA	NA	NA	NA	NA	NA	NA	NA
I_2613981	I	2613981	0.486681	Slope	4.05719	0	NA	NA	NA	NA	NA	NA	NA	NA	NA
I_2615044	I	2615044	0.0644676	Slope	4.05719	0	NA	NA	NA	NA	NA	NA	NA	NA	NA
I_2615064	I	2615064	0.0611519	Slope	4.05719	0	NA	NA	NA	NA	NA	NA	NA	NA	NA
I_2616658	I	2616658	0.107594	Slope	4.05719	0	NA	NA	NA	NA	NA	NA	NA	NA	NA
I_2620495	I	2620495	0.313291	Slope	4.05719	0	NA	NA	NA	NA	NA	NA	NA	NA	NA
I_2622177	I	2622177	0.277086	Slope	4.05719	0	NA	NA	NA	NA	NA	NA	NA	NA	NA
I_2622358	I	2622358	0.393058	Slope	4.05719	0	NA	NA	NA	NA	NA	NA	NA	NA	NA
I_2626847	I	2626847	0.146497	Slope	4.05719	0	NA	NA	NA	NA	NA	NA	NA	NA	NA
I_2626895	I	2626895	0.318945	Slope	4.05719	0	NA	NA	NA	NA	NA	NA	NA	NA	NA
I_2626961	I	2626961	0.415444	Slope	4.05719	0	NA	NA	NA	NA	NA	NA	NA	NA	NA
I_2631289	I	2631289	0.184723	Slope	4.05719	0	NA	NA	NA	NA	NA	NA	NA	NA	NA
I_2638525	I	2638525	0.592143	Slope	4.05719	0	NA	NA	NA	NA	NA	NA	NA	NA	NA
I_2639752	I	2639752	0.104069	Slope	4.05719	0	NA	NA	NA	NA	NA	NA	NA	NA	NA
I_2643819	I	2643819	0.0202674	Slope	4.05719	0	NA	NA	NA	NA	NA	NA	NA	NA	NA
I_2644590	I	2644590	0.107594	Slope	4.05719	0	NA	NA	NA	NA	NA	NA	NA	NA	NA
I_2644807	I	2644807	0.161522	Slope	4.05719	0	NA	NA	NA	NA	NA	NA	NA	NA	NA
I_2650013	I	2650013	1.31843	Slope	4.05719	0	NA	NA	NA	NA	NA	NA	NA	NA	NA
I_2650123	I	2650123	0.0407588	Slope	4.05719	0	NA	NA	NA	NA	NA	NA	NA	NA	NA
I_2652806	I	2652806	0.656946	Slope	4.05719	0	NA	NA	NA	NA	NA	NA	NA	NA	NA
I_2652807	I	2652807	0.385229	Slope	4.05719	0	NA	NA	NA	NA	NA	NA	NA	NA	NA
I_2652934	I	2652934	0.208306	Slope	4.05719	0	NA	NA	NA	NA	NA	NA	NA	NA	NA
I_2655249	I	2655249	0.16037	Slope	4.05719	0	NA	NA	NA	NA	NA	NA	NA	NA	NA
I_2659668	I	2659668	0.104069	Slope	4.05719	0	NA	NA	NA	NA	NA	NA	NA	NA	NA
I_2667630	I	2667630	0.116209	Slope	4.05719	0	NA	NA	NA	NA	NA	NA	NA	NA	NA
I_2671939	I	2671939	0.345275	Slope	4.05719	0	NA	NA	NA	NA	NA	NA	NA	NA	NA
I_2673498	I	2673498	0.0380666	Slope	4.05719	0	NA	NA	NA	NA	NA	NA	NA	NA	NA
I_2675051	I	2675051	0.385229	Slope	4.05719	0	NA	NA	NA	NA	NA	NA	NA	NA	NA
I_2677088	I	2677088	1.2001	Slope	4.05719	0	NA	NA	NA	NA	NA	NA	NA	NA	NA
I_2678210	I	2678210	0.196564	Slope	4.05719	0	NA	NA	NA	NA	NA	NA	NA	NA	NA
I_2679492	I	2679492	1.0186	Slope	4.05719	0	NA	NA	NA	NA	NA	NA	NA	NA	NA
I_2681097	I	2681097	0.856189	Slope	4.05719	0	NA	NA	NA	NA	NA	NA	NA	NA	NA
I_2681368	I	2681368	1.04324	Slope	4.05719	0	NA	NA	NA	NA	NA	NA	NA	NA	NA
I_2681803	I	2681803	0.118128	Slope	4.05719	0	NA	NA	NA	NA	NA	NA	NA	NA	NA
I_2683778	I	2683778	0.0339796	Slope	4.05719	0	NA	NA	NA	NA	NA	NA	NA	NA	NA
I_2685709	I	2685709	0.719621	Slope	4.05719	0	NA	NA	NA	NA	NA	NA	NA	NA	NA
I_2686529	I	2686529	0.0269065	Slope	4.05719	0	NA	NA	NA	NA	NA	NA	NA	NA	NA
I_2688866	I	2688866	0.120898	Slope	4.05719	0	NA	NA	NA	NA	NA	NA	NA	NA	NA
I_2690596	I	2690596	0.416107	Slope	4.05719	0	NA	NA	NA	NA	NA	NA	NA	NA	NA
I_2691032	I	2691032	0.800406	Slope	4.05719	0	NA	NA	NA	NA	NA	NA	NA	NA	NA
I_2692904	I	2692904	0.622019	Slope	4.05719	0	NA	NA	NA	NA	NA	NA	NA	NA	NA
I_2693609	I	2693609	0.598162	Slope	4.05719	0	NA	NA	NA	NA	NA	NA	NA	NA	NA
I_2693910	I	2693910	0.18844	Slope	4.05719	0	NA	NA	NA	NA	NA	NA	NA	NA	NA
I_2694134	I	2694134	0.716319	Slope	4.05719	0	NA	NA	NA	NA	NA	NA	NA	NA	NA
I_2695908	I	2695908	0.615603	Slope	4.05719	0	NA	NA	NA	NA	NA	NA	NA	NA	NA
I_2698086	I	2698086	0.407922	Slope	4.05719	0	NA	NA	NA	NA	NA	NA	NA	NA	NA
I_2700443	I	2700443	0.0258272	Slope	4.05719	0	NA	NA	NA	NA	NA	NA	NA	NA	NA
I_2702880	I	2702880	1.49548	Slope	4.05719	0	NA	NA	NA	NA	NA	NA	NA	NA	NA
I_2704709	I	2704709	0.0898969	Slope	4.05719	0	NA	NA	NA	NA	NA	NA	NA	NA	NA
I_2706869	I	2706869	0.28796	Slope	4.05719	0	NA	NA	NA	NA	NA	NA	NA	NA	NA
I_2707175	I	2707175	0.195669	Slope	4.05719	0	NA	NA	NA	NA	NA	NA	NA	NA	NA
I_2708044	I	2708044	0.472328	Slope	4.05719	0	NA	NA	NA	NA	NA	NA	NA	NA	NA
I_2708571	I	2708571	0.337335	Slope	4.05719	0	NA	NA	NA	NA	NA	NA	NA	NA	NA
I_2708720	I	2708720	0.370088	Slope	4.05719	0	NA	NA	NA	NA	NA	NA	NA	NA	NA
I_2709439	I	2709439	0.381104	Slope	4.05719	0	NA	NA	NA	NA	NA	NA	NA	NA	NA
I_2713786	I	2713786	0.615603	Slope	4.05719	0	NA	NA	NA	NA	NA	NA	NA	NA	NA
I_2715321	I	2715321	0.00201285	Slope	4.05719	0	NA	NA	NA	NA	NA	NA	NA	NA	NA
I_2715340	I	2715340	0.196564	Slope	4.05719	0	NA	NA	NA	NA	NA	NA	NA	NA	NA
I_2716664	I	2716664	0.368454	Slope	4.05719	0	NA	NA	NA	NA	NA	NA	NA	NA	NA
I_2719649	I	2719649	1.43425	Slope	4.05719	0	NA	NA	NA	NA	NA	NA	NA	NA	NA
I_2722444	I	2722444	0.0258272	Slope	4.05719	0	NA	NA	NA	NA	NA	NA	NA	NA	NA
I_2722901	I	2722901	1.36981	Slope	4.05719	0	NA	NA	NA	NA	NA	NA	NA	NA	NA
I_2723482	I	2723482	0.195433	Slope	4.05719	0	NA	NA	NA	NA	NA	NA	NA	NA	NA
I_2724334	I	2724334	0.0686367	Slope	4.05719	0	NA	NA	NA	NA	NA	NA	NA	NA	NA
I_2725259	I	2725259	0.294619	Slope	4.05719	0	NA	NA	NA	NA	NA	NA	NA	NA	NA
I_2725644	I	2725644	0.413256	Slope	4.05719	0	NA	NA	NA	NA	NA	NA	NA	NA	NA
I_2725969	I	2725969	0.0842172	Slope	4.05719	0	NA	NA	NA	NA	NA	NA	NA	NA	NA
I_2728998	I	2728998	0.737011	Slope	4.05719	0	NA	NA	NA	NA	NA	NA	NA	NA	NA
I_2729074	I	2729074	0.592897	Slope	4.05719	0	NA	NA	NA	NA	NA	NA	NA	NA	NA
I_2730263	I	2730263	0.21011	Slope	4.05719	0	NA	NA	NA	NA	NA	NA	NA	NA	NA
I_2730317	I	2730317	0.769567	Slope	4.05719	0	NA	NA	NA	NA	NA	NA	NA	NA	NA
I_2731652	I	2731652	0.575741	Slope	4.05719	0	NA	NA	NA	NA	NA	NA	NA	NA	NA
I_2733130	I	2733130	0.240502	Slope	4.05719	0	NA	NA	NA	NA	NA	NA	NA	NA	NA
I_2734982	I	2734982	0.70533	Slope	4.05719	0	NA	NA	NA	NA	NA	NA	NA	NA	NA
I_2735552	I	2735552	0.307202	Slope	4.05719	0	NA	NA	NA	NA	NA	NA	NA	NA	NA
I_2735588	I	2735588	0.597246	Slope	4.05719	0	NA	NA	NA	NA	NA	NA	NA	NA	NA
I_2735653	I	2735653	0.138379	Slope	4.05719	0	NA	NA	NA	NA	NA	NA	NA	NA	NA
I_2735870	I	2735870	0.365922	Slope	4.05719	0	NA	NA	NA	NA	NA	NA	NA	NA	NA
I_2741267	I	2741267	0.135325	Slope	4.05719	0	NA	NA	NA	NA	NA	NA	NA	NA	NA
I_2741877	I	2741877	0.348268	Slope	4.05719	0	NA	NA	NA	NA	NA	NA	NA	NA	NA
I_2744758	I	2744758	0.0179064	Slope	4.05719	0	NA	NA	NA	NA	NA	NA	NA	NA	NA
I_2745367	I	2745367	0.0264991	Slope	4.05719	0	NA	NA	NA	NA	NA	NA	NA	NA	NA
I_2747057	I	2747057	0.0578875	Slope	4.05719	0	NA	NA	NA	NA	NA	NA	NA	NA	NA
I_2747158	I	2747158	0.0529777	Slope	4.05719	0	NA	NA	NA	NA	NA	NA	NA	NA	NA
I_2747389	I	2747389	0.196564	Slope	4.05719	0	NA	NA	NA	NA	NA	NA	NA	NA	NA
I_2747946	I	2747946	0.370088	Slope	4.05719	0	NA	NA	NA	NA	NA	NA	NA	NA	NA
I_2747950	I	2747950	0.716319	Slope	4.05719	0	NA	NA	NA	NA	NA	NA	NA	NA	NA
I_2748569	I	2748569	0.419823	Slope	4.05719	0	NA	NA	NA	NA	NA	NA	NA	NA	NA
I_2751052	I	2751052	0.558406	Slope	4.05719	0	NA	NA	NA	NA	NA	NA	NA	NA	NA
I_2751110	I	2751110	0.677182	Slope	4.05719	0	NA	NA	NA	NA	NA	NA	NA	NA	NA
I_2751642	I	2751642	0.0264991	Slope	4.05719	0	NA	NA	NA	NA	NA	NA	NA	NA	NA
I_2752137	I	2752137	0.196197	Slope	4.05719	0	NA	NA	NA	NA	NA	NA	NA	NA	NA
I_2752557	I	2752557	0.386146	Slope	4.05719	0	NA	NA	NA	NA	NA	NA	NA	NA	NA
I_2752673	I	2752673	0.385968	Slope	4.05719	0	NA	NA	NA	NA	NA	NA	NA	NA	NA
I_2753144	I	2753144	0.274956	Slope	4.05719	0	NA	NA	NA	NA	NA	NA	NA	NA	NA
I_2753837	I	2753837	0.0696608	Slope	4.05719	0	NA	NA	NA	NA	NA	NA	NA	NA	NA
I_2754010	I	2754010	0.438047	Slope	4.05719	0	NA	NA	NA	NA	NA	NA	NA	NA	NA
I_2756179	I	2756179	0.217805	Slope	4.05719	0	NA	NA	NA	NA	NA	NA	NA	NA	NA
I_2757564	I	2757564	0.0696608	Slope	4.05719	0	NA	NA	NA	NA	NA	NA	NA	NA	NA
I_2758220	I	2758220	0.0383814	Slope	4.05719	0	NA	NA	NA	NA	NA	NA	NA	NA	NA
I_2758746	I	2758746	0.0331157	Slope	4.05719	0	NA	NA	NA	NA	NA	NA	NA	NA	NA
I_2761065	I	2761065	0.27769	Slope	4.05719	0	NA	NA	NA	NA	NA	NA	NA	NA	NA
I_2763438	I	2763438	0.846831	Slope	4.05719	0	NA	NA	NA	NA	NA	NA	NA	NA	NA
I_2763701	I	2763701	0.29063	Slope	4.05719	0	NA	NA	NA	NA	NA	NA	NA	NA	NA
I_2764083	I	2764083	0.632065	Slope	4.05719	0	NA	NA	NA	NA	NA	NA	NA	NA	NA
I_2765220	I	2765220	0.611677	Slope	4.05719	0	NA	NA	NA	NA	NA	NA	NA	NA	NA
I_2767728	I	2767728	0.143548	Slope	4.05719	0	NA	NA	NA	NA	NA	NA	NA	NA	NA
I_2769417	I	2769417	0.205977	Slope	4.05719	0	NA	NA	NA	NA	NA	NA	NA	NA	NA
I_2769653	I	2769653	0.405911	Slope	4.05719	0	NA	NA	NA	NA	NA	NA	NA	NA	NA
I_2771257	I	2771257	0.764467	Slope	4.05719	0	NA	NA	NA	NA	NA	NA	NA	NA	NA
I_2772888	I	2772888	0.180929	Slope	4.05719	0	NA	NA	NA	NA	NA	NA	NA	NA	NA
I_2773126	I	2773126	0.0892773	Slope	4.05719	0	NA	NA	NA	NA	NA	NA	NA	NA	NA
I_2773797	I	2773797	0.291558	Slope	4.05719	0	NA	NA	NA	NA	NA	NA	NA	NA	NA
I_2775225	I	2775225	0.99894	Slope	4.05719	0	NA	NA	NA	NA	NA	NA	NA	NA	NA
I_2775396	I	2775396	0.227045	Slope	4.05719	0	NA	NA	NA	NA	NA	NA	NA	NA	NA
I_2776274	I	2776274	0.585321	Slope	4.05719	0	NA	NA	NA	NA	NA	NA	NA	NA	NA
I_2776934	I	2776934	0.0577959	Slope	4.05719	0	NA	NA	NA	NA	NA	NA	NA	NA	NA
I_2776940	I	2776940	0.0999322	Slope	4.05719	0	NA	NA	NA	NA	NA	NA	NA	NA	NA
I_2777129	I	2777129	0.460688	Slope	4.05719	0	NA	NA	NA	NA	NA	NA	NA	NA	NA
I_2777504	I	2777504	0.148749	Slope	4.05719	0	NA	NA	NA	NA	NA	NA	NA	NA	NA
I_2777596	I	2777596	0.0586849	Slope	4.05719	0	NA	NA	NA	NA	NA	NA	NA	NA	NA
I_2778113	I	2778113	0.238119	Slope	4.05719	0	NA	NA	NA	NA	NA	NA	NA	NA	NA
I_2783834	I	2783834	0.555689	Slope	4.05719	0	NA	NA	NA	NA	NA	NA	NA	NA	NA
I_2785419	I	2785419	0.109859	Slope	4.05719	0	NA	NA	NA	NA	NA	NA	NA	NA	NA
I_2786569	I	2786569	0.0358382	Slope	4.05719	0	NA	NA	NA	NA	NA	NA	NA	NA	NA
I_2789743	I	2789743	0.751796	Slope	4.05719	0	NA	NA	NA	NA	NA	NA	NA	NA	NA
I_2795012	I	2795012	0.425171	Slope	4.05719	0	NA	NA	NA	NA	NA	NA	NA	NA	NA
I_2798999	I	2798999	0.0587634	Slope	4.05719	0	NA	NA	NA	NA	NA	NA	NA	NA	NA
I_2802046	I	2802046	0.00664002	Slope	4.05719	0	NA	NA	NA	NA	NA	NA	NA	NA	NA
I_2804940	I	2804940	0.0752486	Slope	4.05719	0	NA	NA	NA	NA	NA	NA	NA	NA	NA
I_2806051	I	2806051	0.452821	Slope	4.05719	0	NA	NA	NA	NA	NA	NA	NA	NA	NA
I_2818332	I	2818332	0.299919	Slope	4.05719	0	NA	NA	NA	NA	NA	NA	NA	NA	NA
I_2820691	I	2820691	0.0274041	Slope	4.05719	0	NA	NA	NA	NA	NA	NA	NA	NA	NA
I_2821835	I	2821835	0.632813	Slope	4.05719	0	NA	NA	NA	NA	NA	NA	NA	NA	NA
I_2823448	I	2823448	0.418109	Slope	4.05719	0	NA	NA	NA	NA	NA	NA	NA	NA	NA
I_2824804	I	2824804	0.00031366	Slope	4.05719	0	NA	NA	NA	NA	NA	NA	NA	NA	NA
I_2825145	I	2825145	0.0601401	Slope	4.05719	0	NA	NA	NA	NA	NA	NA	NA	NA	NA
I_2826618	I	2826618	0.0143399	Slope	4.05719	0	NA	NA	NA	NA	NA	NA	NA	NA	NA
I_2828218	I	2828218	0.251706	Slope	4.05719	0	NA	NA	NA	NA	NA	NA	NA	NA	NA
I_2833571	I	2833571	0.120734	Slope	4.05719	0	NA	NA	NA	NA	NA	NA	NA	NA	NA
I_2834520	I	2834520	0.212705	Slope	4.05719	0	NA	NA	NA	NA	NA	NA	NA	NA	NA
I_2835348	I	2835348	0.0340081	Slope	4.05719	0	NA	NA	NA	NA	NA	NA	NA	NA	NA
I_2835977	I	2835977	0.370088	Slope	4.05719	0	NA	NA	NA	NA	NA	NA	NA	NA	NA
I_2838134	I	2838134	0.0464022	Slope	4.05719	0	NA	NA	NA	NA	NA	NA	NA	NA	NA
I_2838437	I	2838437	0.00550717	Slope	4.05719	0	NA	NA	NA	NA	NA	NA	NA	NA	NA
I_2839088	I	2839088	0.553856	Slope	4.05719	0	NA	NA	NA	NA	NA	NA	NA	NA	NA
I_2839375	I	2839375	0.418109	Slope	4.05719	0	NA	NA	NA	NA	NA	NA	NA	NA	NA
I_2842684	I	2842684	0.0412882	Slope	4.05719	0	NA	NA	NA	NA	NA	NA	NA	NA	NA
I_2847512	I	2847512	0.19869	Slope	4.05719	0	NA	NA	NA	NA	NA	NA	NA	NA	NA
I_2847563	I	2847563	0.0803608	Slope	4.05719	0	NA	NA	NA	NA	NA	NA	NA	NA	NA
I_2850734	I	2850734	0.164438	Slope	4.05719	0	NA	NA	NA	NA	NA	NA	NA	NA	NA
I_2852511	I	2852511	0.258584	Slope	4.05719	0	NA	NA	NA	NA	NA	NA	NA	NA	NA
I_2864308	I	2864308	0.400233	Slope	4.05719	0	NA	NA	NA	NA	NA	NA	NA	NA	NA
I_2877377	I	2877377	0.313132	Slope	4.05719	0	NA	NA	NA	NA	NA	NA	NA	NA	NA
I_2878983	I	2878983	0.30078	Slope	4.05719	0	NA	NA	NA	NA	NA	NA	NA	NA	NA
I_2879170	I	2879170	0.210713	Slope	4.05719	0	NA	NA	NA	NA	NA	NA	NA	NA	NA
I_2880459	I	2880459	0.285815	Slope	4.05719	0	NA	NA	NA	NA	NA	NA	NA	NA	NA
I_2888630	I	2888630	0.348639	Slope	4.05719	0	NA	NA	NA	NA	NA	NA	NA	NA	NA
I_2889203	I	2889203	0.370088	Slope	4.05719	0	NA	NA	NA	NA	NA	NA	NA	NA	NA
I_2895884	I	2895884	0.371763	Slope	4.05719	0	NA	NA	NA	NA	NA	NA	NA	NA	NA
I_2895898	I	2895898	0.152104	Slope	4.05719	0	NA	NA	NA	NA	NA	NA	NA	NA	NA
I_2897768	I	2897768	0.831325	Slope	4.05719	0	NA	NA	NA	NA	NA	NA	NA	NA	NA
I_2899256	I	2899256	0.0743562	Slope	4.05719	0	NA	NA	NA	NA	NA	NA	NA	NA	NA
I_2903989	I	2903989	0.0879276	Slope	4.05719	0	NA	NA	NA	NA	NA	NA	NA	NA	NA
I_2906037	I	2906037	0.0375216	Slope	4.05719	0	NA	NA	NA	NA	NA	NA	NA	NA	NA
I_2906957	I	2906957	0.211166	Slope	4.05719	0	NA	NA	NA	NA	NA	NA	NA	NA	NA
I_2915506	I	2915506	0.859158	Slope	4.05719	0	NA	NA	NA	NA	NA	NA	NA	NA	NA
I_2920771	I	2920771	0.370088	Slope	4.05719	0	NA	NA	NA	NA	NA	NA	NA	NA	NA
I_2921239	I	2921239	0.233029	Slope	4.05719	0	NA	NA	NA	NA	NA	NA	NA	NA	NA
I_2923206	I	2923206	0.385294	Slope	4.05719	0	NA	NA	NA	NA	NA	NA	NA	NA	NA
I_2923426	I	2923426	0.271458	Slope	4.05719	0	NA	NA	NA	NA	NA	NA	NA	NA	NA
I_2926151	I	2926151	0.102614	Slope	4.05719	0	NA	NA	NA	NA	NA	NA	NA	NA	NA
I_2930431	I	2930431	0.140545	Slope	4.05719	0	NA	NA	NA	NA	NA	NA	NA	NA	NA
I_2930976	I	2930976	0.146341	Slope	4.05719	0	NA	NA	NA	NA	NA	NA	NA	NA	NA
I_2931053	I	2931053	0.275742	Slope	4.05719	0	NA	NA	NA	NA	NA	NA	NA	NA	NA
I_2933149	I	2933149	0.254329	Slope	4.05719	0	NA	NA	NA	NA	NA	NA	NA	NA	NA
I_2940116	I	2940116	0.24159	Slope	4.05719	0	NA	NA	NA	NA	NA	NA	NA	NA	NA
I_2940601	I	2940601	0.179947	Slope	4.05719	0	NA	NA	NA	NA	NA	NA	NA	NA	NA
I_2940742	I	2940742	0.0442711	Slope	4.05719	0	NA	NA	NA	NA	NA	NA	NA	NA	NA
I_2941789	I	2941789	0.592161	Slope	4.05719	0	NA	NA	NA	NA	NA	NA	NA	NA	NA
I_2942491	I	2942491	0.449555	Slope	4.05719	0	NA	NA	NA	NA	NA	NA	NA	NA	NA
I_2942901	I	2942901	0.0654692	Slope	4.05719	0	NA	NA	NA	NA	NA	NA	NA	NA	NA
I_2944266	I	2944266	0.351015	Slope	4.05719	0	NA	NA	NA	NA	NA	NA	NA	NA	NA
I_2945643	I	2945643	0.033146	Slope	4.05719	0	NA	NA	NA	NA	NA	NA	NA	NA	NA
I_2947304	I	2947304	0.109107	Slope	4.05719	0	NA	NA	NA	NA	NA	NA	NA	NA	NA
I_2947305	I	2947305	0.0365662	Slope	4.05719	0	NA	NA	NA	NA	NA	NA	NA	NA	NA
I_2947376	I	2947376	0.0782634	Slope	4.05719	0	NA	NA	NA	NA	NA	NA	NA	NA	NA
I_2948007	I	2948007	0.266539	Slope	4.05719	0	NA	NA	NA	NA	NA	NA	NA	NA	NA
I_2949987	I	2949987	0.126686	Slope	4.05719	0	NA	NA	NA	NA	NA	NA	NA	NA	NA
I_2950237	I	2950237	0.124165	Slope	4.05719	0	NA	NA	NA	NA	NA	NA	NA	NA	NA
I_2950547	I	2950547	0.380885	Slope	4.05719	0	NA	NA	NA	NA	NA	NA	NA	NA	NA
I_2950767	I	2950767	0.387374	Slope	4.05719	0	NA	NA	NA	NA	NA	NA	NA	NA	NA
I_2951462	I	2951462	0.181177	Slope	4.05719	0	NA	NA	NA	NA	NA	NA	NA	NA	NA
I_2953051	I	2953051	0.16211	Slope	4.05719	0	NA	NA	NA	NA	NA	NA	NA	NA	NA
I_2954186	I	2954186	0.0820327	Slope	4.05719	0	NA	NA	NA	NA	NA	NA	NA	NA	NA
I_2956461	I	2956461	0.0524383	Slope	4.05719	0	NA	NA	NA	NA	NA	NA	NA	NA	NA
I_2958982	I	2958982	0.0258181	Slope	4.05719	0	NA	NA	NA	NA	NA	NA	NA	NA	NA
I_2960082	I	2960082	0.114625	Slope	4.05719	0	NA	NA	NA	NA	NA	NA	NA	NA	NA
I_2960974	I	2960974	0.0182933	Slope	4.05719	0	NA	NA	NA	NA	NA	NA	NA	NA	NA
I_2963845	I	2963845	0.472441	Slope	4.05719	0	NA	NA	NA	NA	NA	NA	NA	NA	NA
I_2966165	I	2966165	0.100488	Slope	4.05719	0	NA	NA	NA	NA	NA	NA	NA	NA	NA
I_2973046	I	2973046	0.202756	Slope	4.05719	0	NA	NA	NA	NA	NA	NA	NA	NA	NA
I_2975775	I	2975775	0.229052	Slope	4.05719	0	NA	NA	NA	NA	NA	NA	NA	NA	NA
I_2984622	I	2984622	0.213805	Slope	4.05719	0	NA	NA	NA	NA	NA	NA	NA	NA	NA
I_2990137	I	2990137	0.11467	Slope	4.05719	0	NA	NA	NA	NA	NA	NA	NA	NA	NA
I_2991018	I	2991018	0.212527	Slope	4.05719	0	NA	NA	NA	NA	NA	NA	NA	NA	NA
I_2994073	I	2994073	0.922045	Slope	4.05719	0	NA	NA	NA	NA	NA	NA	NA	NA	NA
I_2994273	I	2994273	0.329657	Slope	4.05719	0	NA	NA	NA	NA	NA	NA	NA	NA	NA
I_2996463	I	2996463	0.151363	Slope	4.05719	0	NA	NA	NA	NA	NA	NA	NA	NA	NA
I_2999342	I	2999342	0.318901	Slope	4.05719	0	NA	NA	NA	NA	NA	NA	NA	NA	NA
I_3001139	I	3001139	0.100488	Slope	4.05719	0	NA	NA	NA	NA	NA	NA	NA	NA	NA
I_3001144	I	3001144	0.0890192	Slope	4.05719	0	NA	NA	NA	NA	NA	NA	NA	NA	NA
I_3001330	I	3001330	0.10492	Slope	4.05719	0	NA	NA	NA	NA	NA	NA	NA	NA	NA
I_3002453	I	3002453	0.23871	Slope	4.05719	0	NA	NA	NA	NA	NA	NA	NA	NA	NA
I_3005983	I	3005983	0.384815	Slope	4.05719	0	NA	NA	NA	NA	NA	NA	NA	NA	NA
I_3007540	I	3007540	0.827748	Slope	4.05719	0	NA	NA	NA	NA	NA	NA	NA	NA	NA
I_3008127	I	3008127	1.03045	Slope	4.05719	0	NA	NA	NA	NA	NA	NA	NA	NA	NA
I_3010546	I	3010546	0.263108	Slope	4.05719	0	NA	NA	NA	NA	NA	NA	NA	NA	NA
I_3012703	I	3012703	0.00432875	Slope	4.05719	0	NA	NA	NA	NA	NA	NA	NA	NA	NA
I_3016051	I	3016051	0.0990747	Slope	4.05719	0	NA	NA	NA	NA	NA	NA	NA	NA	NA
I_3017236	I	3017236	0.0379609	Slope	4.05719	0	NA	NA	NA	NA	NA	NA	NA	NA	NA
I_3021298	I	3021298	0.152434	Slope	4.05719	0	NA	NA	NA	NA	NA	NA	NA	NA	NA
I_3023301	I	3023301	0.611599	Slope	4.05719	0	NA	NA	NA	NA	NA	NA	NA	NA	NA
I_3024927	I	3024927	0.186316	Slope	4.05719	0	NA	NA	NA	NA	NA	NA	NA	NA	NA
I_3028204	I	3028204	0.354617	Slope	4.05719	0	NA	NA	NA	NA	NA	NA	NA	NA	NA
I_3028305	I	3028305	0.108611	Slope	4.05719	0	NA	NA	NA	NA	NA	NA	NA	NA	NA
I_3029222	I	3029222	0.553918	Slope	4.05719	0	NA	NA	NA	NA	NA	NA	NA	NA	NA
I_3029502	I	3029502	0.671133	Slope	4.05719	0	NA	NA	NA	NA	NA	NA	NA	NA	NA
I_3031319	I	3031319	0.192371	Slope	4.05719	0	NA	NA	NA	NA	NA	NA	NA	NA	NA
I_3031401	I	3031401	1.05277	Slope	4.05719	0	NA	NA	NA	NA	NA	NA	NA	NA	NA
I_3031428	I	3031428	0.0429927	Slope	4.05719	0	NA	NA	NA	NA	NA	NA	NA	NA	NA
I_3035873	I	3035873	0.206904	Slope	4.05719	0	NA	NA	NA	NA	NA	NA	NA	NA	NA
I_3037936	I	3037936	0.151363	Slope	4.05719	0	NA	NA	NA	NA	NA	NA	NA	NA	NA
I_3038096	I	3038096	0.532697	Slope	4.05719	0	NA	NA	NA	NA	NA	NA	NA	NA	NA
I_3039157	I	3039157	0.198018	Slope	4.05719	0	NA	NA	NA	NA	NA	NA	NA	NA	NA
I_3042553	I	3042553	0.116984	Slope	4.05719	0	NA	NA	NA	NA	NA	NA	NA	NA	NA
I_3042556	I	3042556	0.0323256	Slope	4.05719	0	NA	NA	NA	NA	NA	NA	NA	NA	NA
I_3050079	I	3050079	0.0108489	Slope	4.05719	0	NA	NA	NA	NA	NA	NA	NA	NA	NA
I_3051257	I	3051257	0.121658	Slope	4.05719	0	NA	NA	NA	NA	NA	NA	NA	NA	NA
I_3051565	I	3051565	0.0330528	Slope	4.05719	0	NA	NA	NA	NA	NA	NA	NA	NA	NA
I_3051582	I	3051582	0.256581	Slope	4.05719	0	NA	NA	NA	NA	NA	NA	NA	NA	NA
I_3054046	I	3054046	0.441329	Slope	4.05719	0	NA	NA	NA	NA	NA	NA	NA	NA	NA
I_3055353	I	3055353	0.0530149	Slope	4.05719	0	NA	NA	NA	NA	NA	NA	NA	NA	NA
I_3058678	I	3058678	0.142837	Slope	4.05719	0	NA	NA	NA	NA	NA	NA	NA	NA	NA
I_3059060	I	3059060	0.952894	Slope	4.05719	0	NA	NA	NA	NA	NA	NA	NA	NA	NA
I_3060434	I	3060434	0.178845	Slope	4.05719	0	NA	NA	NA	NA	NA	NA	NA	NA	NA
I_3066704	I	3066704	0.372036	Slope	4.05719	0	NA	NA	NA	NA	NA	NA	NA	NA	NA
I_3073674	I	3073674	0.636496	Slope	4.05719	0	NA	NA	NA	NA	NA	NA	NA	NA	NA
I_3073698	I	3073698	0.675433	Slope	4.05719	0	NA	NA	NA	NA	NA	NA	NA	NA	NA
I_3073756	I	3073756	0.182509	Slope	4.05719	0	NA	NA	NA	NA	NA	NA	NA	NA	NA
I_3076864	I	3076864	0.243756	Slope	4.05719	0	NA	NA	NA	NA	NA	NA	NA	NA	NA
I_3077294	I	3077294	0.681928	Slope	4.05719	0	NA	NA	NA	NA	NA	NA	NA	NA	NA
I_3077537	I	3077537	0.00368681	Slope	4.05719	0	NA	NA	NA	NA	NA	NA	NA	NA	NA
I_3078537	I	3078537	0.0382157	Slope	4.05719	0	NA	NA	NA	NA	NA	NA	NA	NA	NA
I_3078696	I	3078696	0.0378348	Slope	4.05719	0	NA	NA	NA	NA	NA	NA	NA	NA	NA
I_3079031	I	3079031	0.311643	Slope	4.05719	0	NA	NA	NA	NA	NA	NA	NA	NA	NA
I_3079695	I	3079695	0.479492	Slope	4.05719	0	NA	NA	NA	NA	NA	NA	NA	NA	NA
I_3079880	I	3079880	0.51383	Slope	4.05719	0	NA	NA	NA	NA	NA	NA	NA	NA	NA
I_3080051	I	3080051	0.554339	Slope	4.05719	0	NA	NA	NA	NA	NA	NA	NA	NA	NA
I_3080241	I	3080241	0.375196	Slope	4.05719	0	NA	NA	NA	NA	NA	NA	NA	NA	NA
I_3080890	I	3080890	0.0641929	Slope	4.05719	0	NA	NA	NA	NA	NA	NA	NA	NA	NA
I_3081052	I	3081052	0.293373	Slope	4.05719	0	NA	NA	NA	NA	NA	NA	NA	NA	NA
I_3085725	I	3085725	0.103206	Slope	4.05719	0	NA	NA	NA	NA	NA	NA	NA	NA	NA
I_3085742	I	3085742	0.320109	Slope	4.05719	0	NA	NA	NA	NA	NA	NA	NA	NA	NA
I_3086935	I	3086935	0.0143769	Slope	4.05719	0	NA	NA	NA	NA	NA	NA	NA	NA	NA
I_3087289	I	3087289	0.00528427	Slope	4.05719	0	NA	NA	NA	NA	NA	NA	NA	NA	NA
I_3092123	I	3092123	0.159965	Slope	4.05719	0	NA	NA	NA	NA	NA	NA	NA	NA	NA
I_3095061	I	3095061	0.391648	Slope	4.05719	0	NA	NA	NA	NA	NA	NA	NA	NA	NA
I_3105707	I	3105707	0.889505	Slope	4.05719	0	NA	NA	NA	NA	NA	NA	NA	NA	NA
I_3107585	I	3107585	0.00982849	Slope	4.05719	0	NA	NA	NA	NA	NA	NA	NA	NA	NA
I_3108247	I	3108247	0.30169	Slope	4.05719	0	NA	NA	NA	NA	NA	NA	NA	NA	NA
I_3109660	I	3109660	0.223092	Slope	4.05719	0	NA	NA	NA	NA	NA	NA	NA	NA	NA
I_3110074	I	3110074	1.49827	Slope	4.05719	0	NA	NA	NA	NA	NA	NA	NA	NA	NA
I_3110638	I	3110638	0.233725	Slope	4.05719	0	NA	NA	NA	NA	NA	NA	NA	NA	NA
I_3114254	I	3114254	0.666331	Slope	4.05719	0	NA	NA	NA	NA	NA	NA	NA	NA	NA
I_3116679	I	3116679	1.16051	Slope	4.05719	0	NA	NA	NA	NA	NA	NA	NA	NA	NA
I_3116829	I	3116829	0.608438	Slope	4.05719	0	NA	NA	NA	NA	NA	NA	NA	NA	NA
I_3126275	I	3126275	0.228344	Slope	4.05719	0	NA	NA	NA	NA	NA	NA	NA	NA	NA
I_3133323	I	3133323	0.224935	Slope	4.05719	0	NA	NA	NA	NA	NA	NA	NA	NA	NA
I_3136475	I	3136475	0.13141	Slope	4.05719	0	NA	NA	NA	NA	NA	NA	NA	NA	NA
I_3137307	I	3137307	0.118349	Slope	4.05719	0	NA	NA	NA	NA	NA	NA	NA	NA	NA
I_3137820	I	3137820	0.179481	Slope	4.05719	0	NA	NA	NA	NA	NA	NA	NA	NA	NA
I_3139978	I	3139978	0.567004	Slope	4.05719	0	NA	NA	NA	NA	NA	NA	NA	NA	NA
I_3141089	I	3141089	0.78501	Slope	4.05719	0	NA	NA	NA	NA	NA	NA	NA	NA	NA
I_3149768	I	3149768	0.00661651	Slope	4.05719	0	NA	NA	NA	NA	NA	NA	NA	NA	NA
I_3150370	I	3150370	0.207113	Slope	4.05719	0	NA	NA	NA	NA	NA	NA	NA	NA	NA
I_3150563	I	3150563	0.166489	Slope	4.05719	0	NA	NA	NA	NA	NA	NA	NA	NA	NA
I_3151681	I	3151681	0.0240267	Slope	4.05719	0	NA	NA	NA	NA	NA	NA	NA	NA	NA
I_3156149	I	3156149	0.0447805	Slope	4.05719	0	NA	NA	NA	NA	NA	NA	NA	NA	NA
I_3157787	I	3157787	0.490788	Slope	4.05719	0	NA	NA	NA	NA	NA	NA	NA	NA	NA
I_3158376	I	3158376	0.109409	Slope	4.05719	0	NA	NA	NA	NA	NA	NA	NA	NA	NA
I_3159016	I	3159016	0.441816	Slope	4.05719	0	NA	NA	NA	NA	NA	NA	NA	NA	NA
I_3160955	I	3160955	0.42388	Slope	4.05719	0	NA	NA	NA	NA	NA	NA	NA	NA	NA
I_3161614	I	3161614	0.185474	Slope	4.05719	0	NA	NA	NA	NA	NA	NA	NA	NA	NA
I_3164951	I	3164951	0.237209	Slope	4.05719	0	NA	NA	NA	NA	NA	NA	NA	NA	NA
I_3169346	I	3169346	0.0264812	Slope	4.05719	0	NA	NA	NA	NA	NA	NA	NA	NA	NA
I_3173070	I	3173070	0.262478	Slope	4.05719	0	NA	NA	NA	NA	NA	NA	NA	NA	NA
I_3173877	I	3173877	0.562085	Slope	4.05719	0	NA	NA	NA	NA	NA	NA	NA	NA	NA
I_3174078	I	3174078	0.0336589	Slope	4.05719	0	NA	NA	NA	NA	NA	NA	NA	NA	NA
I_3175794	I	3175794	0.925556	Slope	4.05719	0	NA	NA	NA	NA	NA	NA	NA	NA	NA
I_3176074	I	3176074	1.18106	Slope	4.05719	0	NA	NA	NA	NA	NA	NA	NA	NA	NA
I_3178251	I	3178251	1.0323	Slope	4.05719	0	NA	NA	NA	NA	NA	NA	NA	NA	NA
I_3179739	I	3179739	0.0610425	Slope	4.05719	0	NA	NA	NA	NA	NA	NA	NA	NA	NA
I_3182040	I	3182040	0.122056	Slope	4.05719	0	NA	NA	NA	NA	NA	NA	NA	NA	NA
I_3182331	I	3182331	0.843051	Slope	4.05719	0	NA	NA	NA	NA	NA	NA	NA	NA	NA
I_3183631	I	3183631	0.340235	Slope	4.05719	0	NA	NA	NA	NA	NA	NA	NA	NA	NA
I_3183651	I	3183651	0.523244	Slope	4.05719	0	NA	NA	NA	NA	NA	NA	NA	NA	NA
I_3186622	I	3186622	0.131427	Slope	4.05719	0	NA	NA	NA	NA	NA	NA	NA	NA	NA
I_3188224	I	3188224	0.54363	Slope	4.05719	0	NA	NA	NA	NA	NA	NA	NA	NA	NA
I_3190352	I	3190352	0.720299	Slope	4.05719	0	NA	NA	NA	NA	NA	NA	NA	NA	NA
I_3193751	I	3193751	0.459589	Slope	4.05719	0	NA	NA	NA	NA	NA	NA	NA	NA	NA
I_3201918	I	3201918	0.889256	Slope	4.05719	0	NA	NA	NA	NA	NA	NA	NA	NA	NA
I_3203116	I	3203116	0.181716	Slope	4.05719	0	NA	NA	NA	NA	NA	NA	NA	NA	NA
I_3205221	I	3205221	0.0882457	Slope	4.05719	0	NA	NA	NA	NA	NA	NA	NA	NA	NA
I_3207055	I	3207055	0.563636	Slope	4.05719	0	NA	NA	NA	NA	NA	NA	NA	NA	NA
I_3217227	I	3217227	0.472344	Slope	4.05719	0	NA	NA	NA	NA	NA	NA	NA	NA	NA
I_3218107	I	3218107	0.885303	Slope	4.05719	0	NA	NA	NA	NA	NA	NA	NA	NA	NA
I_3221177	I	3221177	1.00095	Slope	4.05719	0	NA	NA	NA	NA	NA	NA	NA	NA	NA
I_3221540	I	3221540	0.905708	Slope	4.05719	0	NA	NA	NA	NA	NA	NA	NA	NA	NA
I_3221739	I	3221739	0.883992	Slope	4.05719	0	NA	NA	NA	NA	NA	NA	NA	NA	NA
I_3221811	I	3221811	0.319114	Slope	4.05719	0	NA	NA	NA	NA	NA	NA	NA	NA	NA
I_3247619	I	3247619	0.245853	Slope	4.05719	0	NA	NA	NA	NA	NA	NA	NA	NA	NA
I_3247687	I	3247687	0.289672	Slope	4.05719	0	NA	NA	NA	NA	NA	NA	NA	NA	NA
I_3247821	I	3247821	0.605008	Slope	4.05719	0	NA	NA	NA	NA	NA	NA	NA	NA	NA
I_3248100	I	3248100	0.255119	Slope	4.05719	0	NA	NA	NA	NA	NA	NA	NA	NA	NA
I_3251320	I	3251320	1.29883	Slope	4.05719	0	NA	NA	NA	NA	NA	NA	NA	NA	NA
I_3252324	I	3252324	0.370088	Slope	4.05719	0	NA	NA	NA	NA	NA	NA	NA	NA	NA
I_3255313	I	3255313	0.496213	Slope	4.05719	0	NA	NA	NA	NA	NA	NA	NA	NA	NA
I_3257894	I	3257894	1.23284	Slope	4.05719	0	NA	NA	NA	NA	NA	NA	NA	NA	NA
I_3261566	I	3261566	0.224772	Slope	4.05719	0	NA	NA	NA	NA	NA	NA	NA	NA	NA
I_3264891	I	3264891	0.764665	Slope	4.05719	0	NA	NA	NA	NA	NA	NA	NA	NA	NA
I_3269991	I	3269991	0.287473	Slope	4.05719	0	NA	NA	NA	NA	NA	NA	NA	NA	NA
I_3279213	I	3279213	0.158151	Slope	4.05719	0	NA	NA	NA	NA	NA	NA	NA	NA	NA
I_3281069	I	3281069	0.123875	Slope	4.05719	0	NA	NA	NA	NA	NA	NA	NA	NA	NA
I_3281882	I	3281882	0.771976	Slope	4.05719	0	NA	NA	NA	NA	NA	NA	NA	NA	NA
I_3284187	I	3284187	0.251179	Slope	4.05719	0	NA	NA	NA	NA	NA	NA	NA	NA	NA
I_3286937	I	3286937	0.0880015	Slope	4.05719	0	NA	NA	NA	NA	NA	NA	NA	NA	NA
I_3290554	I	3290554	0.0835392	Slope	4.05719	0	NA	NA	NA	NA	NA	NA	NA	NA	NA
I_3294351	I	3294351	0.154096	Slope	4.05719	0	NA	NA	NA	NA	NA	NA	NA	NA	NA
I_3294475	I	3294475	0.255163	Slope	4.05719	0	NA	NA	NA	NA	NA	NA	NA	NA	NA
I_3297353	I	3297353	1.10148	Slope	4.05719	0	NA	NA	NA	NA	NA	NA	NA	NA	NA
I_3299295	I	3299295	0.370088	Slope	4.05719	0	NA	NA	NA	NA	NA	NA	NA	NA	NA
I_3299323	I	3299323	1.00478	Slope	4.05719	0	NA	NA	NA	NA	NA	NA	NA	NA	NA
I_3309647	I	3309647	1.31718	Slope	4.05719	0	NA	NA	NA	NA	NA	NA	NA	NA	NA
I_3313010	I	3313010	0.376635	Slope	4.05719	0	NA	NA	NA	NA	NA	NA	NA	NA	NA
I_3313490	I	3313490	0.415809	Slope	4.05719	0	NA	NA	NA	NA	NA	NA	NA	NA	NA
I_3314476	I	3314476	0.462315	Slope	4.05719	0	NA	NA	NA	NA	NA	NA	NA	NA	NA
I_3314589	I	3314589	0.154096	Slope	4.05719	0	NA	NA	NA	NA	NA	NA	NA	NA	NA
I_3319130	I	3319130	0.225704	Slope	4.05719	0	NA	NA	NA	NA	NA	NA	NA	NA	NA
I_3331043	I	3331043	0.0955839	Slope	4.05719	0	NA	NA	NA	NA	NA	NA	NA	NA	NA
I_3331358	I	3331358	0.384664	Slope	4.05719	0	NA	NA	NA	NA	NA	NA	NA	NA	NA
I_3332898	I	3332898	1.0945	Slope	4.05719	0	NA	NA	NA	NA	NA	NA	NA	NA	NA
I_3333530	I	3333530	0.464471	Slope	4.05719	0	NA	NA	NA	NA	NA	NA	NA	NA	NA
I_3336549	I	3336549	0.468965	Slope	4.05719	0	NA	NA	NA	NA	NA	NA	NA	NA	NA
I_3342306	I	3342306	0.302213	Slope	4.05719	0	NA	NA	NA	NA	NA	NA	NA	NA	NA
I_3349887	I	3349887	0.596464	Slope	4.05719	0	NA	NA	NA	NA	NA	NA	NA	NA	NA
I_3352455	I	3352455	0.463971	Slope	4.05719	0	NA	NA	NA	NA	NA	NA	NA	NA	NA
I_3353383	I	3353383	0.289798	Slope	4.05719	0	NA	NA	NA	NA	NA	NA	NA	NA	NA
I_3353704	I	3353704	0.00045503	Slope	4.05719	0	NA	NA	NA	NA	NA	NA	NA	NA	NA
I_3354508	I	3354508	0.222447	Slope	4.05719	0	NA	NA	NA	NA	NA	NA	NA	NA	NA
I_3355885	I	3355885	1.11879	Slope	4.05719	0	NA	NA	NA	NA	NA	NA	NA	NA	NA
I_3357536	I	3357536	0.20326	Slope	4.05719	0	NA	NA	NA	NA	NA	NA	NA	NA	NA
I_3365005	I	3365005	0.632813	Slope	4.05719	0	NA	NA	NA	NA	NA	NA	NA	NA	NA
I_3367255	I	3367255	0.528193	Slope	4.05719	0	NA	NA	NA	NA	NA	NA	NA	NA	NA
I_3373419	I	3373419	0.811203	Slope	4.05719	0	NA	NA	NA	NA	NA	NA	NA	NA	NA
I_3382620	I	3382620	0.505517	Slope	4.05719	0	NA	NA	NA	NA	NA	NA	NA	NA	NA
I_3386183	I	3386183	0.725626	Slope	4.05719	0	NA	NA	NA	NA	NA	NA	NA	NA	NA
I_3394588	I	3394588	0.37788	Slope	4.05719	0	NA	NA	NA	NA	NA	NA	NA	NA	NA
I_3397330	I	3397330	0.00620501	Slope	4.05719	0	NA	NA	NA	NA	NA	NA	NA	NA	NA
I_3397547	I	3397547	0.0573212	Slope	4.05719	0	NA	NA	NA	NA	NA	NA	NA	NA	NA
I_3399293	I	3399293	0.54987	Slope	4.05719	0	NA	NA	NA	NA	NA	NA	NA	NA	NA
I_3401113	I	3401113	1.01367	Slope	4.05719	0	NA	NA	NA	NA	NA	NA	NA	NA	NA
I_3402432	I	3402432	0.98986	Slope	4.05719	0	NA	NA	NA	NA	NA	NA	NA	NA	NA
I_3402540	I	3402540	0.275666	Slope	4.05719	0	NA	NA	NA	NA	NA	NA	NA	NA	NA
I_3407492	I	3407492	0.0307603	Slope	4.05719	0	NA	NA	NA	NA	NA	NA	NA	NA	NA
I_3411605	I	3411605	0.596464	Slope	4.05719	0	NA	NA	NA	NA	NA	NA	NA	NA	NA
I_3416900	I	3416900	0.65119	Slope	4.05719	0	NA	NA	NA	NA	NA	NA	NA	NA	NA
I_3416937	I	3416937	0.487531	Slope	4.05719	0	NA	NA	NA	NA	NA	NA	NA	NA	NA
I_3420242	I	3420242	0.775436	Slope	4.05719	0	NA	NA	NA	NA	NA	NA	NA	NA	NA
I_3420534	I	3420534	0.96547	Slope	4.05719	0	NA	NA	NA	NA	NA	NA	NA	NA	NA
I_3422310	I	3422310	0.637127	Slope	4.05719	0	NA	NA	NA	NA	NA	NA	NA	NA	NA
I_3425944	I	3425944	0.529422	Slope	4.05719	0	NA	NA	NA	NA	NA	NA	NA	NA	NA
I_3426142	I	3426142	0.633554	Slope	4.05719	0	NA	NA	NA	NA	NA	NA	NA	NA	NA
I_3429798	I	3429798	0.212748	Slope	4.05719	0	NA	NA	NA	NA	NA	NA	NA	NA	NA
I_3434148	I	3434148	0.0611582	Slope	4.05719	0	NA	NA	NA	NA	NA	NA	NA	NA	NA
I_3435469	I	3435469	0.240179	Slope	4.05719	0	NA	NA	NA	NA	NA	NA	NA	NA	NA
I_3436471	I	3436471	0.300138	Slope	4.05719	0	NA	NA	NA	NA	NA	NA	NA	NA	NA
I_3436908	I	3436908	0.0522565	Slope	4.05719	0	NA	NA	NA	NA	NA	NA	NA	NA	NA
I_3441198	I	3441198	0.583476	Slope	4.05719	0	NA	NA	NA	NA	NA	NA	NA	NA	NA
I_3445426	I	3445426	0.757151	Slope	4.05719	0	NA	NA	NA	NA	NA	NA	NA	NA	NA
I_3449032	I	3449032	0.0665927	Slope	4.05719	0	NA	NA	NA	NA	NA	NA	NA	NA	NA
I_3450085	I	3450085	0.505517	Slope	4.05719	0	NA	NA	NA	NA	NA	NA	NA	NA	NA
I_3455323	I	3455323	0.669138	Slope	4.05719	0	NA	NA	NA	NA	NA	NA	NA	NA	NA
I_3463734	I	3463734	0.675802	Slope	4.05719	0	NA	NA	NA	NA	NA	NA	NA	NA	NA
I_3465541	I	3465541	0.525383	Slope	4.05719	0	NA	NA	NA	NA	NA	NA	NA	NA	NA
I_3465874	I	3465874	0.107024	Slope	4.05719	0	NA	NA	NA	NA	NA	NA	NA	NA	NA
I_3473790	I	3473790	1.66881	Slope	4.05719	0	NA	NA	NA	NA	NA	NA	NA	NA	NA
I_3474343	I	3474343	1.28946	Slope	4.05719	0	NA	NA	NA	NA	NA	NA	NA	NA	NA
I_3479286	I	3479286	0.435559	Slope	4.05719	0	NA	NA	NA	NA	NA	NA	NA	NA	NA
I_3481687	I	3481687	0.205846	Slope	4.05719	0	NA	NA	NA	NA	NA	NA	NA	NA	NA
I_3489021	I	3489021	1.20461	Slope	4.05719	0	NA	NA	NA	NA	NA	NA	NA	NA	NA
I_3493800	I	3493800	0.158151	Slope	4.05719	0	NA	NA	NA	NA	NA	NA	NA	NA	NA
I_3495584	I	3495584	0.0952784	Slope	4.05719	0	NA	NA	NA	NA	NA	NA	NA	NA	NA
I_3496266	I	3496266	0.370088	Slope	4.05719	0	NA	NA	NA	NA	NA	NA	NA	NA	NA
I_3507776	I	3507776	0.574163	Slope	4.05719	0	NA	NA	NA	NA	NA	NA	NA	NA	NA
I_3508315	I	3508315	0.973373	Slope	4.05719	0	NA	NA	NA	NA	NA	NA	NA	NA	NA
I_3512298	I	3512298	0.063375	Slope	4.05719	0	NA	NA	NA	NA	NA	NA	NA	NA	NA
I_3512515	I	3512515	0.244173	Slope	4.05719	0	NA	NA	NA	NA	NA	NA	NA	NA	NA
I_3514539	I	3514539	0.263354	Slope	4.05719	0	NA	NA	NA	NA	NA	NA	NA	NA	NA
I_3524076	I	3524076	1.47737	Slope	4.05719	0	NA	NA	NA	NA	NA	NA	NA	NA	NA
I_3524078	I	3524078	0.0211784	Slope	4.05719	0	NA	NA	NA	NA	NA	NA	NA	NA	NA
I_3528877	I	3528877	0.644708	Slope	4.05719	0	NA	NA	NA	NA	NA	NA	NA	NA	NA
I_3539083	I	3539083	0.806738	Slope	4.05719	0	NA	NA	NA	NA	NA	NA	NA	NA	NA
I_3539084	I	3539084	0.653283	Slope	4.05719	0	NA	NA	NA	NA	NA	NA	NA	NA	NA
I_3539818	I	3539818	0.980607	Slope	4.05719	0	NA	NA	NA	NA	NA	NA	NA	NA	NA
I_3539920	I	3539920	0.959324	Slope	4.05719	0	NA	NA	NA	NA	NA	NA	NA	NA	NA
I_3540450	I	3540450	1.60378	Slope	4.05719	0	NA	NA	NA	NA	NA	NA	NA	NA	NA
I_3543545	I	3543545	0.644117	Slope	4.05719	0	NA	NA	NA	NA	NA	NA	NA	NA	NA
I_3547196	I	3547196	1.62406	Slope	4.05719	0	NA	NA	NA	NA	NA	NA	NA	NA	NA
I_3552124	I	3552124	0.327326	Slope	4.05719	0	NA	NA	NA	NA	NA	NA	NA	NA	NA
I_3552999	I	3552999	0.758811	Slope	4.05719	0	NA	NA	NA	NA	NA	NA	NA	NA	NA
I_3554258	I	3554258	0.601244	Slope	4.05719	0	NA	NA	NA	NA	NA	NA	NA	NA	NA
I_3557151	I	3557151	0.14034	Slope	4.05719	0	NA	NA	NA	NA	NA	NA	NA	NA	NA
I_3561321	I	3561321	0.0864256	Slope	4.05719	0	NA	NA	NA	NA	NA	NA	NA	NA	NA
I_3572464	I	3572464	0.168116	Slope	4.05719	0	NA	NA	NA	NA	NA	NA	NA	NA	NA
I_3574667	I	3574667	0.120494	Slope	4.05719	0	NA	NA	NA	NA	NA	NA	NA	NA	NA
I_3584752	I	3584752	1.1478	Slope	4.05719	0	NA	NA	NA	NA	NA	NA	NA	NA	NA
I_3586566	I	3586566	0.325866	Slope	4.05719	0	NA	NA	NA	NA	NA	NA	NA	NA	NA
I_3591403	I	3591403	0.139834	Slope	4.05719	0	NA	NA	NA	NA	NA	NA	NA	NA	NA
I_3591406	I	3591406	0.100077	Slope	4.05719	0	NA	NA	NA	NA	NA	NA	NA	NA	NA
I_3593617	I	3593617	0.168068	Slope	4.05719	0	NA	NA	NA	NA	NA	NA	NA	NA	NA
I_3598357	I	3598357	1.28652	Slope	4.05719	0	NA	NA	NA	NA	NA	NA	NA	NA	NA
I_3598596	I	3598596	1.27844	Slope	4.05719	0	NA	NA	NA	NA	NA	NA	NA	NA	NA
I_3599570	I	3599570	0.323616	Slope	4.05719	0	NA	NA	NA	NA	NA	NA	NA	NA	NA
I_3600025	I	3600025	0.82372	Slope	4.05719	0	NA	NA	NA	NA	NA	NA	NA	NA	NA
I_3602755	I	3602755	0.929087	Slope	4.05719	0	NA	NA	NA	NA	NA	NA	NA	NA	NA
I_3602949	I	3602949	1.08514	Slope	4.05719	0	NA	NA	NA	NA	NA	NA	NA	NA	NA
I_3603389	I	3603389	0.9842	Slope	4.05719	0	NA	NA	NA	NA	NA	NA	NA	NA	NA
I_3603753	I	3603753	0.596464	Slope	4.05719	0	NA	NA	NA	NA	NA	NA	NA	NA	NA
I_3617308	I	3617308	1.00469	Slope	4.05719	0	NA	NA	NA	NA	NA	NA	NA	NA	NA
I_3619224	I	3619224	1.05065	Slope	4.05719	0	NA	NA	NA	NA	NA	NA	NA	NA	NA
I_3622453	I	3622453	1.50822	Slope	4.05719	0	NA	NA	NA	NA	NA	NA	NA	NA	NA
I_3628613	I	3628613	0.294412	Slope	4.05719	0	NA	NA	NA	NA	NA	NA	NA	NA	NA
I_3631224	I	3631224	0.227791	Slope	4.05719	0	NA	NA	NA	NA	NA	NA	NA	NA	NA
I_3632198	I	3632198	0.21429	Slope	4.05719	0	NA	NA	NA	NA	NA	NA	NA	NA	NA
I_3636543	I	3636543	0.367807	Slope	4.05719	0	NA	NA	NA	NA	NA	NA	NA	NA	NA
I_3638826	I	3638826	1.18435	Slope	4.05719	0	NA	NA	NA	NA	NA	NA	NA	NA	NA
I_3644078	I	3644078	0.82372	Slope	4.05719	0	NA	NA	NA	NA	NA	NA	NA	NA	NA
I_3655692	I	3655692	0.294412	Slope	4.05719	0	NA	NA	NA	NA	NA	NA	NA	NA	NA
I_3656663	I	3656663	1.50822	Slope	4.05719	0	NA	NA	NA	NA	NA	NA	NA	NA	NA
I_3663456	I	3663456	0.710383	Slope	4.05719	0	NA	NA	NA	NA	NA	NA	NA	NA	NA
I_3666479	I	3666479	1.05065	Slope	4.05719	0	NA	NA	NA	NA	NA	NA	NA	NA	NA
I_3669620	I	3669620	0.912141	Slope	4.05719	0	NA	NA	NA	NA	NA	NA	NA	NA	NA
I_3671430	I	3671430	0.97452	Slope	4.05719	0	NA	NA	NA	NA	NA	NA	NA	NA	NA
I_3673319	I	3673319	0.0281214	Slope	4.05719	0	NA	NA	NA	NA	NA	NA	NA	NA	NA
I_3686343	I	3686343	1.42732	Slope	4.05719	0	NA	NA	NA	NA	NA	NA	NA	NA	NA
I_3688099	I	3688099	0.0484955	Slope	4.05719	0	NA	NA	NA	NA	NA	NA	NA	NA	NA
I_3689255	I	3689255	0.416639	Slope	4.05719	0	NA	NA	NA	NA	NA	NA	NA	NA	NA
I_3689400	I	3689400	0.016158	Slope	4.05719	0	NA	NA	NA	NA	NA	NA	NA	NA	NA
I_3689987	I	3689987	1.00127	Slope	4.05719	0	NA	NA	NA	NA	NA	NA	NA	NA	NA
I_3690226	I	3690226	1.25818	Slope	4.05719	0	NA	NA	NA	NA	NA	NA	NA	NA	NA
I_3690312	I	3690312	1.21137	Slope	4.05719	0	NA	NA	NA	NA	NA	NA	NA	NA	NA
I_3694424	I	3694424	0.482277	Slope	4.05719	0	NA	NA	NA	NA	NA	NA	NA	NA	NA
I_3698290	I	3698290	0.708528	Slope	4.05719	0	NA	NA	NA	NA	NA	NA	NA	NA	NA
I_3701578	I	3701578	0.420889	Slope	4.05719	0	NA	NA	NA	NA	NA	NA	NA	NA	NA
I_3705590	I	3705590	1.47205	Slope	4.05719	0	NA	NA	NA	NA	NA	NA	NA	NA	NA
I_3707300	I	3707300	1.22315	Slope	4.05719	0	NA	NA	NA	NA	NA	NA	NA	NA	NA
I_3710135	I	3710135	1.50822	Slope	4.05719	0	NA	NA	NA	NA	NA	NA	NA	NA	NA
I_3711216	I	3711216	1.86357	Slope	4.05719	0	NA	NA	NA	NA	NA	NA	NA	NA	NA
I_3712049	I	3712049	0.0739115	Slope	4.05719	0	NA	NA	NA	NA	NA	NA	NA	NA	NA
I_3712997	I	3712997	0.61922	Slope	4.05719	0	NA	NA	NA	NA	NA	NA	NA	NA	NA
I_3713655	I	3713655	1.05065	Slope	4.05719	0	NA	NA	NA	NA	NA	NA	NA	NA	NA
I_3718046	I	3718046	1.24536	Slope	4.05719	0	NA	NA	NA	NA	NA	NA	NA	NA	NA
I_3732680	I	3732680	0.990846	Slope	4.05719	0	NA	NA	NA	NA	NA	NA	NA	NA	NA
I_3735456	I	3735456	1.50822	Slope	4.05719	0	NA	NA	NA	NA	NA	NA	NA	NA	NA
I_3739191	I	3739191	0.158151	Slope	4.05719	0	NA	NA	NA	NA	NA	NA	NA	NA	NA
I_3740869	I	3740869	0.732698	Slope	4.05719	0	NA	NA	NA	NA	NA	NA	NA	NA	NA
I_3742277	I	3742277	1.24536	Slope	4.05719	0	NA	NA	NA	NA	NA	NA	NA	NA	NA
I_3754084	I	3754084	0.0739115	Slope	4.05719	0	NA	NA	NA	NA	NA	NA	NA	NA	NA
I_3756357	I	3756357	0.627009	Slope	4.05719	0	NA	NA	NA	NA	NA	NA	NA	NA	NA
I_3757514	I	3757514	0.584667	Slope	4.05719	0	NA	NA	NA	NA	NA	NA	NA	NA	NA
I_3768247	I	3768247	1.05065	Slope	4.05719	0	NA	NA	NA	NA	NA	NA	NA	NA	NA
I_3768271	I	3768271	1.50822	Slope	4.05719	0	NA	NA	NA	NA	NA	NA	NA	NA	NA
I_3769048	I	3769048	1.24536	Slope	4.05719	0	NA	NA	NA	NA	NA	NA	NA	NA	NA
I_3782283	I	3782283	0.158151	Slope	4.05719	0	NA	NA	NA	NA	NA	NA	NA	NA	NA
I_3784154	I	3784154	1.24536	Slope	4.05719	0	NA	NA	NA	NA	NA	NA	NA	NA	NA
I_3784207	I	3784207	1.50822	Slope	4.05719	0	NA	NA	NA	NA	NA	NA	NA	NA	NA
I_3788025	I	3788025	0.0739115	Slope	4.05719	0	NA	NA	NA	NA	NA	NA	NA	NA	NA
I_3790000	I	3790000	1.50822	Slope	4.05719	0	NA	NA	NA	NA	NA	NA	NA	NA	NA
I_3792190	I	3792190	1.24536	Slope	4.05719	0	NA	NA	NA	NA	NA	NA	NA	NA	NA
I_3796249	I	3796249	0.708528	Slope	4.05719	0	NA	NA	NA	NA	NA	NA	NA	NA	NA
I_3803223	I	3803223	0.329563	Slope	4.05719	0	NA	NA	NA	NA	NA	NA	NA	NA	NA
I_3807959	I	3807959	0.158151	Slope	4.05719	0	NA	NA	NA	NA	NA	NA	NA	NA	NA
I_3808215	I	3808215	0.0739115	Slope	4.05719	0	NA	NA	NA	NA	NA	NA	NA	NA	NA
I_3812519	I	3812519	1.24536	Slope	4.05719	0	NA	NA	NA	NA	NA	NA	NA	NA	NA
I_3829022	I	3829022	0.0739115	Slope	4.05719	0	NA	NA	NA	NA	NA	NA	NA	NA	NA
I_3841592	I	3841592	1.24232	Slope	4.05719	0	NA	NA	NA	NA	NA	NA	NA	NA	NA
I_3841632	I	3841632	0.708528	Slope	4.05719	0	NA	NA	NA	NA	NA	NA	NA	NA	NA
I_3847782	I	3847782	0.609492	Slope	4.05719	0	NA	NA	NA	NA	NA	NA	NA	NA	NA
I_3852796	I	3852796	1.50822	Slope	4.05719	0	NA	NA	NA	NA	NA	NA	NA	NA	NA
I_3853477	I	3853477	0.584667	Slope	4.05719	0	NA	NA	NA	NA	NA	NA	NA	NA	NA
I_3853648	I	3853648	1.24536	Slope	4.05719	0	NA	NA	NA	NA	NA	NA	NA	NA	NA
I_3865139	I	3865139	1.65376	Slope	4.05719	0	NA	NA	NA	NA	NA	NA	NA	NA	NA
I_3880831	I	3880831	0.0801679	Slope	4.05719	0	NA	NA	NA	NA	NA	NA	NA	NA	NA
I_3882189	I	3882189	0.710383	Slope	4.05719	0	NA	NA	NA	NA	NA	NA	NA	NA	NA
I_3882216	I	3882216	1.45897	Slope	4.05719	0	NA	NA	NA	NA	NA	NA	NA	NA	NA
I_3896968	I	3896968	0.558801	Slope	4.05719	0	NA	NA	NA	NA	NA	NA	NA	NA	NA
I_3897985	I	3897985	1.50822	Slope	4.05719	0	NA	NA	NA	NA	NA	NA	NA	NA	NA
I_3904748	I	3904748	0.627009	Slope	4.05719	0	NA	NA	NA	NA	NA	NA	NA	NA	NA
I_3916347	I	3916347	1.05065	Slope	4.05719	0	NA	NA	NA	NA	NA	NA	NA	NA	NA
I_3930796	I	3930796	0.708528	Slope	4.05719	0	NA	NA	NA	NA	NA	NA	NA	NA	NA
I_3931052	I	3931052	0.0398583	Slope	4.05719	0	NA	NA	NA	NA	NA	NA	NA	NA	NA
I_3932193	I	3932193	0.179646	Slope	4.05719	0	NA	NA	NA	NA	NA	NA	NA	NA	NA
I_3932775	I	3932775	0.712008	Slope	4.05719	0	NA	NA	NA	NA	NA	NA	NA	NA	NA
I_3938690	I	3938690	0.627009	Slope	4.05719	0	NA	NA	NA	NA	NA	NA	NA	NA	NA
I_3939348	I	3939348	0.990846	Slope	4.05719	0	NA	NA	NA	NA	NA	NA	NA	NA	NA
I_3942250	I	3942250	0.571591	Slope	4.05719	0	NA	NA	NA	NA	NA	NA	NA	NA	NA
I_3946326	I	3946326	0.158151	Slope	4.05719	0	NA	NA	NA	NA	NA	NA	NA	NA	NA
I_3953235	I	3953235	0.543256	Slope	4.05719	0	NA	NA	NA	NA	NA	NA	NA	NA	NA
I_3977172	I	3977172	1.50822	Slope	4.05719	0	NA	NA	NA	NA	NA	NA	NA	NA	NA
I_3977983	I	3977983	1.31794	Slope	4.05719	0	NA	NA	NA	NA	NA	NA	NA	NA	NA
I_3997801	I	3997801	0.627009	Slope	4.05719	0	NA	NA	NA	NA	NA	NA	NA	NA	NA
I_4004615	I	4004615	0.710383	Slope	4.05719	0	NA	NA	NA	NA	NA	NA	NA	NA	NA
I_4007188	I	4007188	0.158151	Slope	4.05719	0	NA	NA	NA	NA	NA	NA	NA	NA	NA
I_4009346	I	4009346	0.708528	Slope	4.05719	0	NA	NA	NA	NA	NA	NA	NA	NA	NA
I_4012008	I	4012008	1.45374	Slope	4.05719	0	NA	NA	NA	NA	NA	NA	NA	NA	NA
I_4018396	I	4018396	0.282514	Slope	4.05719	0	NA	NA	NA	NA	NA	NA	NA	NA	NA
I_4028053	I	4028053	1.50822	Slope	4.05719	0	NA	NA	NA	NA	NA	NA	NA	NA	NA
I_4028742	I	4028742	0.761051	Slope	4.05719	0	NA	NA	NA	NA	NA	NA	NA	NA	NA
I_4030012	I	4030012	0.373336	Slope	4.05719	0	NA	NA	NA	NA	NA	NA	NA	NA	NA
I_4030098	I	4030098	2.00061	Slope	4.05719	0	NA	NA	NA	NA	NA	NA	NA	NA	NA
I_4049669	I	4049669	0.627009	Slope	4.05719	0	NA	NA	NA	NA	NA	NA	NA	NA	NA
I_4105113	I	4105113	0.761051	Slope	4.05719	0	NA	NA	NA	NA	NA	NA	NA	NA	NA
I_4118733	I	4118733	1.50822	Slope	4.05719	0	NA	NA	NA	NA	NA	NA	NA	NA	NA
I_4121499	I	4121499	0.7124	Slope	4.05719	0	NA	NA	NA	NA	NA	NA	NA	NA	NA
I_4136707	I	4136707	1.05065	Slope	4.05719	0	NA	NA	NA	NA	NA	NA	NA	NA	NA
I_4139060	I	4139060	0.869391	Slope	4.05719	0	NA	NA	NA	NA	NA	NA	NA	NA	NA
I_4144586	I	4144586	0.119778	Slope	4.05719	0	NA	NA	NA	NA	NA	NA	NA	NA	NA
I_4146221	I	4146221	0.461609	Slope	4.05719	0	NA	NA	NA	NA	NA	NA	NA	NA	NA
I_4148135	I	4148135	0.627009	Slope	4.05719	0	NA	NA	NA	NA	NA	NA	NA	NA	NA
I_4164036	I	4164036	0.0173947	Slope	4.05719	0	NA	NA	NA	NA	NA	NA	NA	NA	NA
I_4175984	I	4175984	1.50822	Slope	4.05719	0	NA	NA	NA	NA	NA	NA	NA	NA	NA
I_4184066	I	4184066	0.119778	Slope	4.05719	0	NA	NA	NA	NA	NA	NA	NA	NA	NA
I_4186599	I	4186599	1.05065	Slope	4.05719	0	NA	NA	NA	NA	NA	NA	NA	NA	NA
I_4202729	I	4202729	0.89131	Slope	4.05719	0	NA	NA	NA	NA	NA	NA	NA	NA	NA
I_4209517	I	4209517	0.129663	Slope	4.05719	0	NA	NA	NA	NA	NA	NA	NA	NA	NA
I_4210159	I	4210159	0.298144	Slope	4.05719	0	NA	NA	NA	NA	NA	NA	NA	NA	NA
I_4225746	I	4225746	0.720744	Slope	4.05719	0	NA	NA	NA	NA	NA	NA	NA	NA	NA
I_4225803	I	4225803	0.716922	Slope	4.05719	0	NA	NA	NA	NA	NA	NA	NA	NA	NA
I_4226462	I	4226462	0.370088	Slope	4.05719	0	NA	NA	NA	NA	NA	NA	NA	NA	NA
I_4229554	I	4229554	0.158151	Slope	4.05719	0	NA	NA	NA	NA	NA	NA	NA	NA	NA
I_4236976	I	4236976	0.89131	Slope	4.05719	0	NA	NA	NA	NA	NA	NA	NA	NA	NA
I_4242633	I	4242633	0.211944	Slope	4.05719	0	NA	NA	NA	NA	NA	NA	NA	NA	NA
I_4242983	I	4242983	0.580448	Slope	4.05719	0	NA	NA	NA	NA	NA	NA	NA	NA	NA
I_4261434	I	4261434	1.14409	Slope	4.05719	0	NA	NA	NA	NA	NA	NA	NA	NA	NA
I_4275206	I	4275206	0.168635	Slope	4.05719	0	NA	NA	NA	NA	NA	NA	NA	NA	NA
I_4275431	I	4275431	0.238119	Slope	4.05719	0	NA	NA	NA	NA	NA	NA	NA	NA	NA
I_4301123	I	4301123	0.401217	Slope	4.05719	0	NA	NA	NA	NA	NA	NA	NA	NA	NA
I_4301267	I	4301267	1.36074	Slope	4.05719	0	NA	NA	NA	NA	NA	NA	NA	NA	NA
I_4305556	I	4305556	0.692662	Slope	4.05719	0	NA	NA	NA	NA	NA	NA	NA	NA	NA
I_4310639	I	4310639	0.880125	Slope	4.05719	0	NA	NA	NA	NA	NA	NA	NA	NA	NA
I_4316016	I	4316016	0.00817194	Slope	4.05719	0	NA	NA	NA	NA	NA	NA	NA	NA	NA
I_4319143	I	4319143	0.671131	Slope	4.05719	0	NA	NA	NA	NA	NA	NA	NA	NA	NA
I_4324304	I	4324304	0.615475	Slope	4.05719	0	NA	NA	NA	NA	NA	NA	NA	NA	NA
I_4327702	I	4327702	1.09762	Slope	4.05719	0	NA	NA	NA	NA	NA	NA	NA	NA	NA
I_4328147	I	4328147	0.192224	Slope	4.05719	0	NA	NA	NA	NA	NA	NA	NA	NA	NA
I_4328426	I	4328426	0.206963	Slope	4.05719	0	NA	NA	NA	NA	NA	NA	NA	NA	NA
I_4330620	I	4330620	1.08341	Slope	4.05719	0	NA	NA	NA	NA	NA	NA	NA	NA	NA
I_4332127	I	4332127	0.507711	Slope	4.05719	0	NA	NA	NA	NA	NA	NA	NA	NA	NA
I_4336159	I	4336159	0.284667	Slope	4.05719	0	NA	NA	NA	NA	NA	NA	NA	NA	NA
I_4357553	I	4357553	0.6923	Slope	4.05719	0	NA	NA	NA	NA	NA	NA	NA	NA	NA
I_4357952	I	4357952	0.138207	Slope	4.05719	0	NA	NA	NA	NA	NA	NA	NA	NA	NA
I_4358913	I	4358913	0.880125	Slope	4.05719	0	NA	NA	NA	NA	NA	NA	NA	NA	NA
I_4361432	I	4361432	1.14409	Slope	4.05719	0	NA	NA	NA	NA	NA	NA	NA	NA	NA
I_4365020	I	4365020	0.633646	Slope	4.05719	0	NA	NA	NA	NA	NA	NA	NA	NA	NA
I_4370151	I	4370151	0.179382	Slope	4.05719	0	NA	NA	NA	NA	NA	NA	NA	NA	NA
I_4373534	I	4373534	0.0555215	Slope	4.05719	0	NA	NA	NA	NA	NA	NA	NA	NA	NA
I_4373695	I	4373695	0.370088	Slope	4.05719	0	NA	NA	NA	NA	NA	NA	NA	NA	NA
I_4374696	I	4374696	0.00817194	Slope	4.05719	0	NA	NA	NA	NA	NA	NA	NA	NA	NA
I_4384679	I	4384679	0.507711	Slope	4.05719	0	NA	NA	NA	NA	NA	NA	NA	NA	NA
I_4388560	I	4388560	1.14409	Slope	4.05719	0	NA	NA	NA	NA	NA	NA	NA	NA	NA
I_4391690	I	4391690	0.615475	Slope	4.05719	0	NA	NA	NA	NA	NA	NA	NA	NA	NA
I_4403624	I	4403624	0.880125	Slope	4.05719	0	NA	NA	NA	NA	NA	NA	NA	NA	NA
I_4405609	I	4405609	0.00817194	Slope	4.05719	0	NA	NA	NA	NA	NA	NA	NA	NA	NA
I_4407713	I	4407713	0.370088	Slope	4.05719	0	NA	NA	NA	NA	NA	NA	NA	NA	NA
I_4415779	I	4415779	0.507711	Slope	4.05719	0	NA	NA	NA	NA	NA	NA	NA	NA	NA
I_4420396	I	4420396	0.2395	Slope	4.05719	0	NA	NA	NA	NA	NA	NA	NA	NA	NA
I_4421563	I	4421563	1.14409	Slope	4.05719	0	NA	NA	NA	NA	NA	NA	NA	NA	NA
I_4421776	I	4421776	1.09762	Slope	4.05719	0	NA	NA	NA	NA	NA	NA	NA	NA	NA
I_4432027	I	4432027	0.880125	Slope	4.05719	0	NA	NA	NA	NA	NA	NA	NA	NA	NA
I_4434008	I	4434008	0.370088	Slope	4.05719	0	NA	NA	NA	NA	NA	NA	NA	NA	NA
I_4439242	I	4439242	1.33182	Slope	4.05719	0	NA	NA	NA	NA	NA	NA	NA	NA	NA
I_4446716	I	4446716	0.507711	Slope	4.05719	0	NA	NA	NA	NA	NA	NA	NA	NA	NA
I_4448673	I	4448673	0.782139	Slope	4.05719	0	NA	NA	NA	NA	NA	NA	NA	NA	NA
I_4448977	I	4448977	0.0028815	Slope	4.05719	0	NA	NA	NA	NA	NA	NA	NA	NA	NA
I_4449799	I	4449799	1.09762	Slope	4.05719	0	NA	NA	NA	NA	NA	NA	NA	NA	NA
I_4451410	I	4451410	0.799761	Slope	4.05719	0	NA	NA	NA	NA	NA	NA	NA	NA	NA
I_4453527	I	4453527	0.535962	Slope	4.05719	0	NA	NA	NA	NA	NA	NA	NA	NA	NA
I_4466278	I	4466278	1.09762	Slope	4.05719	0	NA	NA	NA	NA	NA	NA	NA	NA	NA
I_4477427	I	4477427	1.50822	Slope	4.05719	0	NA	NA	NA	NA	NA	NA	NA	NA	NA
I_4478286	I	4478286	1.05065	Slope	4.05719	0	NA	NA	NA	NA	NA	NA	NA	NA	NA
I_4483103	I	4483103	1.47781	Slope	4.05719	0	NA	NA	NA	NA	NA	NA	NA	NA	NA
I_4483252	I	4483252	0.843887	Slope	4.05719	0	NA	NA	NA	NA	NA	NA	NA	NA	NA
I_4489655	I	4489655	0.0657022	Slope	4.05719	0	NA	NA	NA	NA	NA	NA	NA	NA	NA
I_4510510	I	4510510	0.378771	Slope	4.05719	0	NA	NA	NA	NA	NA	NA	NA	NA	NA
I_4511577	I	4511577	0.745843	Slope	4.05719	0	NA	NA	NA	NA	NA	NA	NA	NA	NA
I_4511801	I	4511801	0.543914	Slope	4.05719	0	NA	NA	NA	NA	NA	NA	NA	NA	NA
I_4513340	I	4513340	1.2526	Slope	4.05719	0	NA	NA	NA	NA	NA	NA	NA	NA	NA
I_4521754	I	4521754	0.286325	Slope	4.05719	0	NA	NA	NA	NA	NA	NA	NA	NA	NA
I_4527599	I	4527599	0.0401824	Slope	4.05719	0	NA	NA	NA	NA	NA	NA	NA	NA	NA
I_4531321	I	4531321	0.370088	Slope	4.05719	0	NA	NA	NA	NA	NA	NA	NA	NA	NA
I_4561054	I	4561054	0.378771	Slope	4.05719	0	NA	NA	NA	NA	NA	NA	NA	NA	NA
I_4563732	I	4563732	0.745843	Slope	4.05719	0	NA	NA	NA	NA	NA	NA	NA	NA	NA
I_4563986	I	4563986	0.543914	Slope	4.05719	0	NA	NA	NA	NA	NA	NA	NA	NA	NA
I_4564836	I	4564836	0.158151	Slope	4.05719	0	NA	NA	NA	NA	NA	NA	NA	NA	NA
I_4576986	I	4576986	0.530344	Slope	4.05719	0	NA	NA	NA	NA	NA	NA	NA	NA	NA
I_4593013	I	4593013	0.0410506	Slope	4.05719	0	NA	NA	NA	NA	NA	NA	NA	NA	NA
I_4593675	I	4593675	0.201531	Slope	4.05719	0	NA	NA	NA	NA	NA	NA	NA	NA	NA
I_4594490	I	4594490	1.05391	Slope	4.05719	0	NA	NA	NA	NA	NA	NA	NA	NA	NA
I_4595038	I	4595038	0.745843	Slope	4.05719	0	NA	NA	NA	NA	NA	NA	NA	NA	NA
I_4596315	I	4596315	0.158151	Slope	4.05719	0	NA	NA	NA	NA	NA	NA	NA	NA	NA
I_4605474	I	4605474	0.579287	Slope	4.05719	0	NA	NA	NA	NA	NA	NA	NA	NA	NA
I_4607506	I	4607506	0.423563	Slope	4.05719	0	NA	NA	NA	NA	NA	NA	NA	NA	NA
I_4609835	I	4609835	1.92128	Slope	4.05719	0	NA	NA	NA	NA	NA	NA	NA	NA	NA
I_4621719	I	4621719	0.370088	Slope	4.05719	0	NA	NA	NA	NA	NA	NA	NA	NA	NA
I_4622241	I	4622241	0.0639304	Slope	4.05719	0	NA	NA	NA	NA	NA	NA	NA	NA	NA
I_4628447	I	4628447	0.745843	Slope	4.05719	0	NA	NA	NA	NA	NA	NA	NA	NA	NA
I_4630076	I	4630076	0.423563	Slope	4.05719	0	NA	NA	NA	NA	NA	NA	NA	NA	NA
I_4630737	I	4630737	0.579287	Slope	4.05719	0	NA	NA	NA	NA	NA	NA	NA	NA	NA
I_4631398	I	4631398	0.158151	Slope	4.05719	0	NA	NA	NA	NA	NA	NA	NA	NA	NA
I_4631778	I	4631778	0.378385	Slope	4.05719	0	NA	NA	NA	NA	NA	NA	NA	NA	NA
I_4633612	I	4633612	0.779344	Slope	4.05719	0	NA	NA	NA	NA	NA	NA	NA	NA	NA
I_4636178	I	4636178	0.892739	Slope	4.05719	0	NA	NA	NA	NA	NA	NA	NA	NA	NA
I_4644600	I	4644600	0.120245	Slope	4.05719	0	NA	NA	NA	NA	NA	NA	NA	NA	NA
I_4650694	I	4650694	0.370088	Slope	4.05719	0	NA	NA	NA	NA	NA	NA	NA	NA	NA
I_4653739	I	4653739	0.516672	Slope	4.05719	0	NA	NA	NA	NA	NA	NA	NA	NA	NA
I_4659496	I	4659496	0.397127	Slope	4.05719	0	NA	NA	NA	NA	NA	NA	NA	NA	NA
I_4661359	I	4661359	0.186517	Slope	4.05719	0	NA	NA	NA	NA	NA	NA	NA	NA	NA
I_4662580	I	4662580	0.319745	Slope	4.05719	0	NA	NA	NA	NA	NA	NA	NA	NA	NA
I_4662768	I	4662768	0.26078	Slope	4.05719	0	NA	NA	NA	NA	NA	NA	NA	NA	NA
I_4668159	I	4668159	0.201531	Slope	4.05719	0	NA	NA	NA	NA	NA	NA	NA	NA	NA
I_4669821	I	4669821	0.0966882	Slope	4.05719	0	NA	NA	NA	NA	NA	NA	NA	NA	NA
I_4671786	I	4671786	0.370088	Slope	4.05719	0	NA	NA	NA	NA	NA	NA	NA	NA	NA
I_4686023	I	4686023	1.3006	Slope	4.05719	0	NA	NA	NA	NA	NA	NA	NA	NA	NA
I_4687429	I	4687429	0.745843	Slope	4.05719	0	NA	NA	NA	NA	NA	NA	NA	NA	NA
I_4691442	I	4691442	0.779344	Slope	4.05719	0	NA	NA	NA	NA	NA	NA	NA	NA	NA
I_4696211	I	4696211	0.0304879	Slope	4.05719	0	NA	NA	NA	NA	NA	NA	NA	NA	NA
I_4696683	I	4696683	0.137025	Slope	4.05719	0	NA	NA	NA	NA	NA	NA	NA	NA	NA
I_4696691	I	4696691	0.397127	Slope	4.05719	0	NA	NA	NA	NA	NA	NA	NA	NA	NA
I_4705819	I	4705819	0.370088	Slope	4.05719	0	NA	NA	NA	NA	NA	NA	NA	NA	NA
I_4710200	I	4710200	0.514915	Slope	4.05719	0	NA	NA	NA	NA	NA	NA	NA	NA	NA
I_4710525	I	4710525	0.892739	Slope	4.05719	0	NA	NA	NA	NA	NA	NA	NA	NA	NA
I_4722280	I	4722280	0.779344	Slope	4.05719	0	NA	NA	NA	NA	NA	NA	NA	NA	NA
I_4727684	I	4727684	0.451072	Slope	4.05719	0	NA	NA	NA	NA	NA	NA	NA	NA	NA
I_4735590	I	4735590	0.0490445	Slope	4.05719	0	NA	NA	NA	NA	NA	NA	NA	NA	NA
I_4739024	I	4739024	0.685133	Slope	4.05719	0	NA	NA	NA	NA	NA	NA	NA	NA	NA
I_4741347	I	4741347	0.201531	Slope	4.05719	0	NA	NA	NA	NA	NA	NA	NA	NA	NA
I_4748710	I	4748710	0.227728	Slope	4.05719	0	NA	NA	NA	NA	NA	NA	NA	NA	NA
I_4750006	I	4750006	0.105285	Slope	4.05719	0	NA	NA	NA	NA	NA	NA	NA	NA	NA
I_4754801	I	4754801	0.42241	Slope	4.05719	0	NA	NA	NA	NA	NA	NA	NA	NA	NA
I_4763260	I	4763260	0.345786	Slope	4.05719	0	NA	NA	NA	NA	NA	NA	NA	NA	NA
[truncated: 44,895 more rows]

## Sheet: VariantsInQTL
WBGeneID	MARKER	CHROM	POS	REF	ALT	WBFeature_TYPE	WBFeature_ID	symbol	sequence	VARIANT_IMPACT	NUCLEOTIDE_CHANGE	AMINO_ACID_CHANGE	TYPE	TRAIT	QTL_INTERVAL_START	QTL_INTERVAL_END	VARIANT_LD_WITH_PEAK_MARKER	VARIANT_LOG10p
WBGene00169247	IV_16450530	IV	16450530	TCTCG	T	transcript	Y10G11A.51	21ur-10196	Y10G11A.51	MODIFIER	n.1_4delCGAG	NA	piRNA_gene	Slope	15939340	16613710	NA	1.3398
WBGene00171700	IV_16608337	IV	16608337	C	A	transcript	Y51H4A.752	21ur-10199	Y51H4A.752	MODIFIER	n.16C>A	NA	piRNA_gene	Slope	15939340	16613710	0.0102639	0.12903
WBGene00048228	IV_16546816	IV	16546816	T	TTAGTTTG	transcript	Y51H4A.221	21ur-1050	Y51H4A.221	MODIFIER	n.1_2insTAGTTTG	NA	piRNA_gene	Slope	15939340	16613710	NA	0.0903951
WBGene00048228	IV_16546817	IV	16546817	C	CT	transcript	Y51H4A.221	21ur-1050	Y51H4A.221	MODIFIER	n.2_3insT	NA	piRNA_gene	Slope	15939340	16613710	NA	0.0903951
WBGene00168690	IV_16134835	IV	16134835	GTCT	G	transcript	Y105C5B.898	21ur-10646	Y105C5B.898	MODIFIER	n.10_12delTCT	NA	piRNA_gene	Slope	15939340	16613710	NA	0.0226542
WBGene00169849	IV_16549346	IV	16549346	A	C	transcript	Y51H4A.659	21ur-10814	Y51H4A.659	MODIFIER	n.2A>C	NA	piRNA_gene	Slope	15939340	16613710	0.848024	3.04377
WBGene00170485	IV_16139336	IV	16139336	T	C	transcript	Y105C5B.1047	21ur-10918	Y105C5B.1047	MODIFIER	n.4T>C	NA	piRNA_gene	Slope	15939340	16613710	0.0112471	0.23499
WBGene00168800	IV_16383121	IV	16383121	A	T	transcript	Y7A9D.43	21ur-11058	Y7A9D.43	MODIFIER	n.10T>A	NA	piRNA_gene	Slope	15939340	16613710	0.00480439	0.0782248
WBGene00174178	IV_16152055	IV	16152055	T	C	transcript	Y105C5B.1342	21ur-11281	Y105C5B.1342	MODIFIER	n.15T>C	NA	piRNA_gene	Slope	15939340	16613710	0.131649	0.0761484
WBGene00169568	IV_16176737	IV	16176737	T	A	transcript	Y105C5B.968	21ur-11340	Y105C5B.968	LOW	n.19A>T	NA	piRNA_gene	Slope	15939340	16613710	0.00396152	0.280257
WBGene00171345	IV_15985375	IV	15985375	T	A	transcript	Y105C5B.1113	21ur-11371	Y105C5B.1113	MODIFIER	n.15A>T	NA	piRNA_gene	Slope	15939340	16613710	0.0136632	0.136884
WBGene00172694	IV_16568495	IV	16568495	C	T	transcript	Y51H4A.814	21ur-11380	Y51H4A.814	MODIFIER	n.15G>A	NA	piRNA_gene	Slope	15939340	16613710	0.0102639	0.12903
WBGene00174388	IV_16457424	IV	16457424	A	G	transcript	VY10G11R.69	21ur-11488	VY10G11R.69	MODIFIER	n.13T>C	NA	piRNA_gene	Slope	15939340	16613710	0.0207373	0.407418
WBGene00170384	IV_16165782	IV	16165782	T	G	transcript	Y105C5B.1038	21ur-11635	Y105C5B.1038	LOW	n.21T>G	NA	piRNA_gene	Slope	15939340	16613710	0.0083632	0.160822
WBGene00170384	IV_16165763	IV	16165763	C	T	transcript	Y105C5B.1038	21ur-11635	Y105C5B.1038	MODIFIER	n.2C>T	NA	piRNA_gene	Slope	15939340	16613710	0.00744417	0.341027
WBGene00174302	IV_16374581	IV	16374581	C	T	transcript	C35D6.117	21ur-11817	C35D6.117	MODIFIER	n.8C>T	NA	piRNA_gene	Slope	15939340	16613710	0.0442055	0.745977
WBGene00166213	IV_16604285	IV	16604285	T	G	transcript	Y51H4A.465	21ur-12300	Y51H4A.465	MODIFIER	n.7T>G	NA	piRNA_gene	Slope	15939340	16613710	0.0102639	0.12903
WBGene00165126	IV_16277985	IV	16277985	T	C	transcript	F38C2.48	21ur-12382	F38C2.48	LOW	n.21A>G	NA	piRNA_gene	Slope	15939340	16613710	0.0338164	0.426964
WBGene00167286	IV_16209768	IV	16209768	C	G	transcript	H25K10.78	21ur-12451	H25K10.78	MODIFIER	n.12G>C	NA	piRNA_gene	Slope	15939340	16613710	0.699248	1.91653
WBGene00173425	IV_16442202	IV	16442202	C	G	transcript	Y10G11A.78	21ur-12519	Y10G11A.78	MODIFIER	n.12C>G	NA	piRNA_gene	Slope	15939340	16613710	0.0102639	0.223047
WBGene00174693	IV_16257136	IV	16257136	GT	G	transcript	F38C2.93	21ur-12956	F38C2.93	LOW	n.21delA	NA	piRNA_gene	Slope	15939340	16613710	NA	0.525499
WBGene00173465	IV_16027270	IV	16027270	T	G	transcript	Y105C5B.1280	21ur-13162	Y105C5B.1280	MODIFIER	n.4A>C	NA	piRNA_gene	Slope	15939340	16613710	0.0112471	0.23499
WBGene00174686	IV_16579861	IV	16579861	T	C	transcript	Y51H4A.914	21ur-13415	Y51H4A.914	MODIFIER	n.14A>G	NA	piRNA_gene	Slope	15939340	16613710	0.0405294	0.686948
WBGene00165962	IV_15941532	IV	15941532	A	T	transcript	Y105C5B.677	21ur-13422	Y105C5B.677	MODIFIER	n.9T>A	NA	piRNA_gene	Slope	15939340	16613710	0.00744417	0.233297
WBGene00166371	IV_16543762	IV	16543762	G	A	transcript	Y51H4A.474	21ur-14202	Y51H4A.474	MODIFIER	n.10C>T	NA	piRNA_gene	Slope	15939340	16613710	0.848024	3.04377
WBGene00165702	IV_16457414	IV	16457414	T	C	transcript	VY10G11R.33	21ur-14869	VY10G11R.33	MODIFIER	n.5A>G	NA	piRNA_gene	Slope	15939340	16613710	0.0102639	0.223047
WBGene00166525	IV_16436729	IV	16436729	C	CTATTA	transcript	Y10G11A.37	21ur-14979	Y10G11A.37	LOW	n.20_21insATTAT	NA	piRNA_gene	Slope	15939340	16613710	NA	0.223047
WBGene00166525	IV_16436731	IV	16436731	C	T	transcript	Y10G11A.37	21ur-14979	Y10G11A.37	LOW	n.21C>T	NA	piRNA_gene	Slope	15939340	16613710	0.0102639	0.223047
WBGene00172000	IV_16374093	IV	16374093	AATTTTAAAGCTGTTTCAATATTCTGACAAATTATTTAGATTTTATTCAAATGTATTAATAGC	A	transcript	C35D6.103	21ur-15235	C35D6.103	MODIFIER	n.-52_10delATTTTAAAGCTGTTTCAATATTCTGACAAATTATTTAGATTTTATTCAAATGTATTAATAGC	NA	piRNA_gene	Slope	15939340	16613710	NA	0.0782248
WBGene00172429	IV_16599671	IV	16599671	G	A	transcript	Y51H4A.800	21ur-15442	Y51H4A.800	MODIFIER	n.10C>T	NA	piRNA_gene	Slope	15939340	16613710	0.0102639	0.223047
WBGene00046156	IV_16452213	IV	16452213	C	CAAATATACGACAAAAAATTAATAGAAGAG	transcript	VY10G11R.8	21ur-1546	VY10G11R.8	MODIFIER	n.14_15insATATACGACAAAAAATTAATAGAAGAGAA	NA	piRNA_gene	Slope	15939340	16613710	NA	0.775176
WBGene00046057	IV_15989531	IV	15989531	C	T	transcript	Y105C5B.79	21ur-1696	Y105C5B.79	MODIFIER	n.13C>T	NA	piRNA_gene	Slope	15939340	16613710	0.00256767	0.769062
WBGene00049351	IV_16434972	IV	16434972	GTCTAATTCT	G	transcript	Y10G11A.23	21ur-1706	Y10G11A.23	LOW	n.12_20delAGAATTAGA	NA	piRNA_gene	Slope	15939340	16613710	NA	0.223047
WBGene00047522	IV_15956005	IV	15956005	A	T	transcript	Y105C5B.234	21ur-1839	Y105C5B.234	LOW	n.19T>A	NA	piRNA_gene	Slope	15939340	16613710	0.00930289	0.141892
WBGene00045966	IV_16447951	IV	16447951	G	A	transcript	Y10G11A.7	21ur-1954	Y10G11A.7	MODIFIER	n.15C>T	NA	piRNA_gene	Slope	15939340	16613710	0.00566539	0.379645
WBGene00049698	IV_16606265	IV	16606265	T	A	transcript	Y51H4A.319	21ur-2074	Y51H4A.319	MODIFIER	n.4T>A	NA	piRNA_gene	Slope	15939340	16613710	0.0212297	0.611015
WBGene00048971	IV_16473008	IV	16473008	G	C	transcript	Y51H4A.267	21ur-209	Y51H4A.267	MODIFIER	n.16C>G	NA	piRNA_gene	Slope	15939340	16613710	0.0122531	0.179424
WBGene00050513	IV_16605055	IV	16605055	G	T	transcript	Y51H4A.376	21ur-2104	Y51H4A.376	LOW	n.21G>T	NA	piRNA_gene	Slope	15939340	16613710	0.0026009	0.266241
WBGene00050513	IV_16605042	IV	16605042	A	T	transcript	Y51H4A.376	21ur-2104	Y51H4A.376	MODIFIER	n.8A>T	NA	piRNA_gene	Slope	15939340	16613710	0.00396152	0.0538147
WBGene00047189	IV_16601252	IV	16601252	C	T	transcript	Y51H4A.142	21ur-2255	Y51H4A.142	MODIFIER	n.9G>A	NA	piRNA_gene	Slope	15939340	16613710	0.0102639	0.223047
WBGene00050175	IV_16134664	IV	16134664	A	G	transcript	Y105C5B.519	21ur-2283	Y105C5B.519	MODIFIER	n.18T>C	NA	piRNA_gene	Slope	15939340	16613710	0.000164582	0.0412855
WBGene00049697	IV_16014195	IV	16014195	A	G	transcript	Y105C5B.481	21ur-2384	Y105C5B.481	LOW	n.21T>C	NA	piRNA_gene	Slope	15939340	16613710	0.0112471	0.23499
WBGene00050266	IV_15985272	IV	15985272	G	T	transcript	Y105C5B.531	21ur-2443	Y105C5B.531	MODIFIER	n.18C>A	NA	piRNA_gene	Slope	15939340	16613710	0.0112471	0.176013
WBGene00049729	IV_16178466	IV	16178466	A	G	transcript	Y105C5B.484	21ur-2485	Y105C5B.484	MODIFIER	n.4T>C	NA	piRNA_gene	Slope	15939340	16613710	0.251873	0.916208
WBGene00048833	IV_16041508	IV	16041508	T	C	transcript	Y105C5B.387	21ur-2505	Y105C5B.387	LOW	n.19A>G	NA	piRNA_gene	Slope	15939340	16613710	0.0119227	0.504099
WBGene00050747	IV_16124806	IV	16124806	G	GT	gene_variant	WBGene00050747	21ur-2523	Y105C5B.598	MODIFIER	n.16124807dupT	NA	piRNA_gene	Slope	15939340	16613710	NA	0.361294
WBGene00046335	IV_16167653	IV	16167653	G	A	transcript	Y105C5B.107	21ur-2814	Y105C5B.107	MODIFIER	n.16G>A	NA	piRNA_gene	Slope	15939340	16613710	0.0998012	0.0295191
WBGene00045810	IV_16045665	IV	16045665	T	C	transcript	Y105C5B.53	21ur-3054	Y105C5B.53	LOW	n.19T>C	NA	piRNA_gene	Slope	15939340	16613710	0.00885085	0.638927
WBGene00045615	IV_16522241	IV	16522241	A	G	transcript	Y51H4A.39	21ur-310	Y51H4A.39	MODIFIER	n.3A>G	NA	piRNA_gene	Slope	15939340	16613710	0.0188172	0.204748
WBGene00045615	IV_16522256	IV	16522256	A	G	transcript	Y51H4A.39	21ur-310	Y51H4A.39	MODIFIER	n.18A>G	NA	piRNA_gene	Slope	15939340	16613710	0.0387748	0.114107
WBGene00047395	IV_16190289	IV	16190289	C	T	transcript	Y7A9A.10	21ur-3348	Y7A9A.10	MODIFIER	n.5C>T	NA	piRNA_gene	Slope	15939340	16613710	0.699248	1.91653
WBGene00045950	IV_16381348	IV	16381348	C	T	transcript	Y7A9D.7	21ur-3425	Y7A9D.7	MODIFIER	n.2C>T	NA	piRNA_gene	Slope	15939340	16613710	0.0102639	0.223047
WBGene00045950	IV_16381352	IV	16381352	G	GT	transcript	Y7A9D.7	21ur-3425	Y7A9D.7	MODIFIER	n.14dupT	NA	piRNA_gene	Slope	15939340	16613710	NA	0.111824
WBGene00045950	IV_16381354	IV	16381354	T	A	transcript	Y7A9D.7	21ur-3425	Y7A9D.7	MODIFIER	n.8T>A	NA	piRNA_gene	Slope	15939340	16613710	0.108314	0.0443319
WBGene00045527	IV_15955254	IV	15955254	C	T	transcript	Y105C5B.32	21ur-3449	Y105C5B.32	MODIFIER	n.6G>A	NA	piRNA_gene	Slope	15939340	16613710	0.00930289	0.141892
WBGene00047766	IV_16257186	IV	16257186	A	G	transcript	F38C2.28	21ur-3735	F38C2.28	MODIFIER	n.5T>C	NA	piRNA_gene	Slope	15939340	16613710	0.0132827	0.504882
WBGene00047766	IV_16257190	IV	16257190	A	G	transcript	F38C2.28	21ur-3735	F38C2.28	MODIFIER	n.1T>C	NA	piRNA_gene	Slope	15939340	16613710	0.00566539	0.161384
WBGene00047766	IV_16257188	IV	16257188	A	G	transcript	F38C2.28	21ur-3735	F38C2.28	MODIFIER	n.3T>C	NA	piRNA_gene	Slope	15939340	16613710	0.00480439	0.0782248
WBGene00050426	IV_16142035	IV	16142035	A	T	transcript	Y105C5B.554	21ur-3948	Y105C5B.554	MODIFIER	n.13T>A	NA	piRNA_gene	Slope	15939340	16613710	0.000830027	0.0973093
WBGene00050426	IV_16142034	IV	16142034	A	G	transcript	Y105C5B.554	21ur-3948	Y105C5B.554	MODIFIER	n.14T>C	NA	piRNA_gene	Slope	15939340	16613710	0.000830027	0.0973093
WBGene00049427	IV_16611602	IV	16611602	TTCGTTTCAGTAAGCCGTTGG	T	transcript	Y51H4A.299	21ur-4227	Y51H4A.299	MODIFIER	n.-16_4delTCGTTTCAGTAAGCCGTTGG	NA	piRNA_gene	Slope	15939340	16613710	NA	0.212069
WBGene00047646	IV_16151667	IV	16151667	G	A	transcript	Y105C5B.249	21ur-4275	Y105C5B.249	MODIFIER	n.6C>T	NA	piRNA_gene	Slope	15939340	16613710	0.178062	0.0550081
WBGene00050324	IV_15963113	IV	15963113	G	A	transcript	Y105C5B.537	21ur-4377	Y105C5B.537	LOW	n.21G>A	NA	piRNA_gene	Slope	15939340	16613710	0.00566539	1.53771
WBGene00046490	IV_16564008	IV	16564008	A	G	transcript	Y51H4A.92	21ur-4475	Y51H4A.92	MODIFIER	n.8T>C	NA	piRNA_gene	Slope	15939340	16613710	0.00744417	0.153953
WBGene00047329	IV_16438576	IV	16438576	T	A	transcript	Y10G11A.12	21ur-4601	Y10G11A.12	LOW	n.19A>T	NA	piRNA_gene	Slope	15939340	16613710	0.0102639	0.223047
WBGene00048816	IV_16284123	IV	16284123	C	G	transcript	Y7A9C.15	21ur-4728	Y7A9C.15	LOW	n.19G>C	NA	piRNA_gene	Slope	15939340	16613710	0.342891	1.66806
WBGene00050774	IV_15949242	IV	15949242	G	T	transcript	Y105C5B.600	21ur-4838	Y105C5B.600	LOW	n.20G>T	NA	piRNA_gene	Slope	15939340	16613710	0.00930289	0.141892
WBGene00049301	IV_16531843	IV	16531843	A	C	transcript	Y51H4A.291	21ur-4871	Y51H4A.291	MODIFIER	n.16T>G	NA	piRNA_gene	Slope	15939340	16613710	0.0102639	0.223047
WBGene00050141	IV_16531454	IV	16531454	A	T	transcript	Y51H4A.353	21ur-4884	Y51H4A.353	MODIFIER	n.11T>A	NA	piRNA_gene	Slope	15939340	16613710	0.0354206	0.0196799
WBGene00048771	IV_16589061	IV	16589061	G	T	transcript	Y51H4A.252	21ur-5103	Y51H4A.252	MODIFIER	n.11C>A	NA	piRNA_gene	Slope	15939340	16613710	0.00613731	0.49173
WBGene00047238	IV_16547823	IV	16547823	G	A	transcript	Y51H4A.148	21ur-5206	Y51H4A.148	MODIFIER	n.10G>A	NA	piRNA_gene	Slope	15939340	16613710	0.0102639	0.0903951
WBGene00050431	IV_15991871	IV	15991871	A	T	transcript	Y105C5B.555	21ur-528	Y105C5B.555	MODIFIER	n.5T>A	NA	piRNA_gene	Slope	15939340	16613710	0.479945	0.825831
WBGene00048410	IV_16549218	IV	16549218	G	A	transcript	Y51H4A.232	21ur-5289	Y51H4A.232	MODIFIER	n.16G>A	NA	piRNA_gene	Slope	15939340	16613710	0.0102639	0.0903951
WBGene00171178	IV_16035396	IV	16035396	T	C	transcript	Y105C5B.1103	21ur-5641	Y105C5B.1103	MODIFIER	n.1T>C	NA	piRNA_gene	Slope	15939340	16613710	0.0143369	1.26075
WBGene00048065	IV_16568870	IV	16568870	G	T	transcript	Y51H4A.204	21ur-576	Y51H4A.204	MODIFIER	n.6C>A	NA	piRNA_gene	Slope	15939340	16613710	0.00566539	0.212069
WBGene00172551	IV_16442426	IV	16442426	T	TTAAACTATC	transcript	Y10G11A.70	21ur-5972	Y10G11A.70	MODIFIER	n.17_18insGATAGTTTA	NA	piRNA_gene	Slope	15939340	16613710	NA	0.0444232
WBGene00174312	IV_16612708	IV	16612708	A	T	transcript	Y51H4A.898	21ur-6137	Y51H4A.898	MODIFIER	n.14T>A	NA	piRNA_gene	Slope	15939340	16613710	0.00557182	0.120706
WBGene00169268	IV_16455084	IV	16455084	A	AT	transcript	VY10G11R.45	21ur-6172	VY10G11R.45	MODIFIER	n.15dupA	NA	piRNA_gene	Slope	15939340	16613710	NA	3.72646
WBGene00169268	IV_16455083	IV	16455083	C	T	transcript	VY10G11R.45	21ur-6172	VY10G11R.45	MODIFIER	n.17G>A	NA	piRNA_gene	Slope	15939340	16613710	0.0143369	0.265355
WBGene00169268	IV_16455089	IV	16455089	T	C	transcript	VY10G11R.45	21ur-6172	VY10G11R.45	MODIFIER	n.11A>G	NA	piRNA_gene	Slope	15939340	16613710	0.0143369	0.265355
WBGene00166721	IV_16281302	IV	16281302	T	C	transcript	Y7A9C.18	21ur-6272	Y7A9C.18	LOW	n.19T>C	NA	piRNA_gene	Slope	15939340	16613710	0.0338164	0.426964
WBGene00168584	IV_15975737	IV	15975737	T	A	transcript	Y105C5B.892	21ur-6288	Y105C5B.892	MODIFIER	n.2T>A	NA	piRNA_gene	Slope	15939340	16613710	0.00744417	0.233297
WBGene00173464	IV_16374359	IV	16374359	A	G	transcript	C35D6.108	21ur-6306	C35D6.108	MODIFIER	n.12A>G	NA	piRNA_gene	Slope	15939340	16613710	0.00480439	0.0782248
WBGene00173150	IV_16439864	IV	16439864	A	T	transcript	Y10G11A.76	21ur-6632	Y10G11A.76	MODIFIER	n.2T>A	NA	piRNA_gene	Slope	15939340	16613710	0.0154165	1.46671
WBGene00174437	IV_16443125	IV	16443125	C	T	transcript	Y10G11A.85	21ur-7372	Y10G11A.85	MODIFIER	n.2G>A	NA	piRNA_gene	Slope	15939340	16613710	0.00566539	0.379645
WBGene00173493	IV_16035678	IV	16035678	C	T	transcript	Y105C5B.1282	21ur-7548	Y105C5B.1282	LOW	n.19C>T	NA	piRNA_gene	Slope	15939340	16613710	0.00885085	0.142607
WBGene00171456	IV_16607683	IV	16607683	A	G	transcript	Y51H4A.738	21ur-7655	Y51H4A.738	MODIFIER	n.8A>G	NA	piRNA_gene	Slope	15939340	16613710	0.00566539	0.212069
WBGene00169005	IV_16025620	IV	16025620	G	GA	transcript	Y105C5B.927	21ur-7772	Y105C5B.927	LOW	n.19dupA	NA	piRNA_gene	Slope	15939340	16613710	NA	0.054147
WBGene00172778	IV_16032509	IV	16032509	CT	C	transcript	Y105C5B.1227	21ur-7887	Y105C5B.1227	MODIFIER	n.16delT	NA	piRNA_gene	Slope	15939340	16613710	NA	1.91653
WBGene00173437	IV_16472738	IV	16472738	A	G	transcript	Y51H4A.850	21ur-8255	Y51H4A.850	MODIFIER	n.13T>C	NA	piRNA_gene	Slope	15939340	16613710	3.01196e-05	0.544141
WBGene00173437	IV_16472736	IV	16472736	C	T	transcript	Y51H4A.850	21ur-8255	Y51H4A.850	MODIFIER	n.15G>A	NA	piRNA_gene	Slope	15939340	16613710	0.0122531	0.179424
WBGene00165298	IV_16509858	IV	16509858	A	G	transcript	Y51H4A.422	21ur-8323	Y51H4A.422	MODIFIER	n.8T>C	NA	piRNA_gene	Slope	15939340	16613710	0.0387748	0.114107
WBGene00165876	IV_16218205	IV	16218205	C	T	transcript	H25K10.65	21ur-8619	H25K10.65	LOW	n.21G>A	NA	piRNA_gene	Slope	15939340	16613710	0.00480439	0.6137
WBGene00173679	IV_16124556	IV	16124556	G	T	transcript	Y105C5B.1292	21ur-8636	Y105C5B.1292	MODIFIER	n.15G>T	NA	piRNA_gene	Slope	15939340	16613710	0.0461325	0.516179
WBGene00173679	IV_16124547	IV	16124547	T	C	transcript	Y105C5B.1292	21ur-8636	Y105C5B.1292	MODIFIER	n.6T>C	NA	piRNA_gene	Slope	15939340	16613710	0.00566539	0.246522
WBGene00165779	IV_16479743	IV	16479743	A	T	transcript	Y51H4A.441	21ur-8768	Y51H4A.441	MODIFIER	n.11T>A	NA	piRNA_gene	Slope	15939340	16613710	0.00396152	0.0115395
WBGene00166669	IV_16607072	IV	16607072	TATAGAGAAAAGA	T	transcript	Y51H4A.494	21ur-8902	Y51H4A.494	MODIFIER	n.4_15delTCTTTTCTCTAT	NA	piRNA_gene	Slope	15939340	16613710	NA	0.178845
WBGene00166080	IV_16028770	IV	16028770	C	T	transcript	Y105C5B.686	21ur-8949	Y105C5B.686	MODIFIER	n.12C>T	NA	piRNA_gene	Slope	15939340	16613710	0.00480439	0.054147
WBGene00172915	IV_16124805	IV	16124805	G	A	transcript	Y105C5B.1242	21ur-9096	Y105C5B.1242	LOW	n.20G>A	NA	piRNA_gene	Slope	15939340	16613710	0.0176556	0.0468498
WBGene00172915	IV_16124789	IV	16124789	G	T	transcript	Y105C5B.1242	21ur-9096	Y105C5B.1242	MODIFIER	n.4G>T	NA	piRNA_gene	Slope	15939340	16613710	0.0132827	0.436509
WBGene00166176	IV_16384341	IV	16384341	C	T	transcript	Y7A9D.31	21ur-9216	Y7A9D.31	MODIFIER	n.8G>A	NA	piRNA_gene	Slope	15939340	16613710	0.00480439	0.0782248
WBGene00171824	IV_16152023	IV	16152023	T	A	transcript	Y105C5B.1154	21ur-9269	Y105C5B.1154	MODIFIER	n.6A>T	NA	piRNA_gene	Slope	15939340	16613710	0.00396152	0.280257
WBGene00174090	IV_16134501	IV	16134501	T	C	transcript	Y105C5B.1333	21ur-9590	Y105C5B.1333	MODIFIER	n.6A>G	NA	piRNA_gene	Slope	15939340	16613710	0.0112471	0.23499
WBGene00174090	IV_16134494	IV	16134494	G	T	transcript	Y105C5B.1333	21ur-9590	Y105C5B.1333	MODIFIER	n.13C>A	NA	piRNA_gene	Slope	15939340	16613710	0.0112471	0.23499
WBGene00046142	IV_16396599	IV	16396599	C	G	transcript	Y65A5A.6	21ur-983	Y65A5A.6	MODIFIER	n.12C>G	NA	piRNA_gene	Slope	15939340	16613710	0.0102639	0.223047
WBGene00167755	IV_16438085	IV	16438085	A	T	transcript	Y10G11A.44	21ur-9880	Y10G11A.44	MODIFIER	n.5T>A	NA	piRNA_gene	Slope	15939340	16613710	0.0102639	0.223047
WBGene00167755	IV_16438088	IV	16438088	G	A	transcript	Y10G11A.44	21ur-9880	Y10G11A.44	MODIFIER	n.2C>T	NA	piRNA_gene	Slope	15939340	16613710	0.0132827	0.0860325
WBGene00167850	IV_16042784	IV	16042784	A	G	transcript	Y105C5B.823	21ur-9929	Y105C5B.823	MODIFIER	n.10T>C	NA	piRNA_gene	Slope	15939340	16613710	0.0130363	0.491216
WBGene00000027	V_2275332	V	2275332	G	A	transcript	Y5H2A.3.1	abu-4	Y5H2A.3	LOW	c.375G>A	p.Pro125Pro	protein_coding_gene	PC1	1345848	2764788	0.152842	1.59584
WBGene00000027	V_2274855	V	2274855	C	T	transcript	Y5H2A.3.1	abu-4	Y5H2A.3	LOW	c.-27C>T	NA	protein_coding_gene	PC1	1345848	2764788	0.190007	1.26327
WBGene00000027	V_2275362	V	2275362	C	T	transcript	Y5H2A.3.1	abu-4	Y5H2A.3	LOW	c.405C>T	p.Ala135Ala	protein_coding_gene	PC1	1345848	2764788	0.190007	1.26327
WBGene00000027	V_2275476	V	2275476	G	A	transcript	Y5H2A.3.1	abu-4	Y5H2A.3	LOW	c.519G>A	p.Gln173Gln	protein_coding_gene	PC1	1345848	2764788	0.190007	1.26327
WBGene00000027	V_2275366	V	2275366	A	G	transcript	Y5H2A.3.1	abu-4	Y5H2A.3	MODERATE	c.409A>G	p.Lys137Glu	protein_coding_gene	PC1	1345848	2764788	0.152842	1.59584
WBGene00000027	V_2275232	V	2275232	A	G	transcript	Y5H2A.3.1	abu-4	Y5H2A.3	MODERATE	c.275A>G	p.Gln92Arg	protein_coding_gene	PC1	1345848	2764788	0.152842	1.59584
WBGene00000027	V_2275684	V	2275684	TCTCCAGTTGTTG	T	transcript	Y5H2A.3.1	abu-4	Y5H2A.3	MODERATE	c.745_756delGTTGTTGCTCCA	p.Val249_Pro252del	protein_coding_gene	PC1	1345848	2764788	NA	0.236564
WBGene00000027	V_2274851	V	2274851	T	C	transcript	Y5H2A.3.1	abu-4	Y5H2A.3	MODIFIER	c.-31T>C	NA	protein_coding_gene	PC1	1345848	2764788	0.190007	1.26327
WBGene00000027	V_2274862	V	2274862	G	A	transcript	Y5H2A.3.1	abu-4	Y5H2A.3	MODIFIER	c.-20G>A	NA	protein_coding_gene	PC1	1345848	2764788	0.190007	1.26327
WBGene00000056	V_2611303	V	2611303	C	T	transcript	F53E10.2b.1	acr-17	F53E10.2	LOW	c.702C>T	p.Asp234Asp	protein_coding_gene	PC1	1345848	2764788	0.210862	0.153855
WBGene00000056	V_2609558	V	2609558	T	C	transcript	F53E10.2b.1	acr-17	F53E10.2	LOW	c.153T>C	p.Asn51Asn	protein_coding_gene	PC1	1345848	2764788	0.210862	0.153855
WBGene00000056	V_2611354	V	2611354	G	A	transcript	F53E10.2b.1	acr-17	F53E10.2	LOW	c.753G>A	p.Thr251Thr	protein_coding_gene	PC1	1345848	2764788	0.210862	0.153855
WBGene00000056	V_2611309	V	2611309	A	G	transcript	F53E10.2b.1	acr-17	F53E10.2	LOW	c.708A>G	p.Ser236Ser	protein_coding_gene	PC1	1345848	2764788	0.000722472	0.145812
WBGene00000056	V_2611420	V	2611420	G	C	transcript	F53E10.2b.1	acr-17	F53E10.2	LOW	c.819G>C	p.Ser273Ser	protein_coding_gene	PC1	1345848	2764788	0.000722472	0.145812
WBGene00000056	V_2609645	V	2609645	T	C	transcript	F53E10.2b.1	acr-17	F53E10.2	LOW	c.240T>C	p.Tyr80Tyr	protein_coding_gene	PC1	1345848	2764788	0.232409	0.104015
WBGene00000056	V_2613538	V	2613538	A	G	transcript	F53E10.2b.1	acr-17	F53E10.2	LOW	c.1218A>G	p.Gln406Gln	protein_coding_gene	PC1	1345848	2764788	0.232409	0.104015
WBGene00000056	V_2609666	V	2609666	A	G	transcript	F53E10.2b.1	acr-17	F53E10.2	LOW	c.261A>G	p.Thr87Thr	protein_coding_gene	PC1	1345848	2764788	0.232409	0.104015
WBGene00000056	V_2611297	V	2611297	C	T	transcript	F53E10.2b.1	acr-17	F53E10.2	LOW	c.696C>T	p.Tyr232Tyr	protein_coding_gene	PC1	1345848	2764788	0.232409	0.104015
WBGene00000056	V_2609732	V	2609732	A	C	transcript	F53E10.2b.1	acr-17	F53E10.2	LOW	c.327A>C	p.Pro109Pro	protein_coding_gene	PC1	1345848	2764788	0.232409	0.104015
WBGene00000056	V_2609642	V	2609642	A	G	transcript	F53E10.2b.1	acr-17	F53E10.2	LOW	c.237A>G	p.Glu79Glu	protein_coding_gene	PC1	1345848	2764788	0.232409	0.104015
WBGene00000056	V_2611363	V	2611363	A	T	transcript	F53E10.2b.1	acr-17	F53E10.2	LOW	c.762A>T	p.Ile254Ile	protein_coding_gene	PC1	1345848	2764788	0.232409	0.104015
WBGene00000056	V_2612885	V	2612885	G	A	transcript	F53E10.2b.1	acr-17	F53E10.2	LOW	c.1083G>A	p.Arg361Arg	protein_coding_gene	PC1	1345848	2764788	0.232409	0.104015
WBGene00000056	V_2610148	V	2610148	T	C	transcript	F53E10.2b.1	acr-17	F53E10.2	LOW	c.585T>C	p.Asn195Asn	protein_coding_gene	PC1	1345848	2764788	0.232409	0.104015
WBGene00000056	V_2614035	V	2614035	C	T	transcript	F53E10.2b.1	acr-17	F53E10.2	LOW	c.1300C>T	p.Leu434Leu	protein_coding_gene	PC1	1345848	2764788	0.232409	0.104015
WBGene00000056	V_2609717	V	2609717	G	A	transcript	F53E10.2b.1	acr-17	F53E10.2	LOW	c.312G>A	p.Glu104Glu	protein_coding_gene	PC1	1345848	2764788	0.232409	0.104015
WBGene00000056	V_2610130	V	2610130	G	A	transcript	F53E10.2b.1	acr-17	F53E10.2	LOW	c.567G>A	p.Ala189Ala	protein_coding_gene	PC1	1345848	2764788	0.224274	0.0956407
WBGene00000056	V_2611375	V	2611375	C	T	transcript	F53E10.2b.1	acr-17	F53E10.2	LOW	c.774C>T	p.Phe258Phe	protein_coding_gene	PC1	1345848	2764788	0.224274	0.0956407
WBGene00000056	V_2611462	V	2611462	A	G	transcript	F53E10.2b.1	acr-17	F53E10.2	LOW	c.861A>G	p.Ala287Ala	protein_coding_gene	PC1	1345848	2764788	3.17249e-05	0.0642442
WBGene00000056	V_2611318	V	2611318	C	T	transcript	F53E10.2b.1	acr-17	F53E10.2	LOW	c.717C>T	p.Phe239Phe	protein_coding_gene	PC1	1345848	2764788	3.17249e-05	0.0642442
WBGene00000056	V_2612891	V	2612891	G	T	transcript	F53E10.2b.1	acr-17	F53E10.2	LOW	c.1089G>T	p.Ser363Ser	protein_coding_gene	PC1	1345848	2764788	0.248687	0.0544425
WBGene00000056	V_2609741	V	2609741	A	T	transcript	F53E10.2b.1	acr-17	F53E10.2	LOW	c.336A>T	p.Leu112Leu	protein_coding_gene	PC1	1345848	2764788	0.248687	0.0544425
WBGene00000056	V_2612912	V	2612912	G	A	transcript	F53E10.2b.1	acr-17	F53E10.2	LOW	c.1110G>A	p.Gly370Gly	protein_coding_gene	PC1	1345848	2764788	0.248687	0.0544425
WBGene00000056	V_2611246	V	2611246	T	C	transcript	F53E10.2b.1	acr-17	F53E10.2	LOW	c.645T>C	p.Asp215Asp	protein_coding_gene	PC1	1345848	2764788	0.248687	0.0544425
WBGene00000056	V_2609982	V	2609982	T	G	transcript	F53E10.2b.1	acr-17	F53E10.2	LOW	c.426-7T>G	NA	protein_coding_gene	PC1	1345848	2764788	0.248687	0.0544425
WBGene00000056	V_2611357	V	2611357	G	T	transcript	F53E10.2b.1	acr-17	F53E10.2	LOW	c.756G>T	p.Leu252Leu	protein_coding_gene	PC1	1345848	2764788	0.248687	0.0544425
WBGene00000056	V_2612936	V	2612936	G	A	transcript	F53E10.2b.1	acr-17	F53E10.2	LOW	c.1134G>A	p.Glu378Glu	protein_coding_gene	PC1	1345848	2764788	0.248687	0.0544425
WBGene00000056	V_2612867	V	2612867	C	A	transcript	F53E10.2b.1	acr-17	F53E10.2	LOW	c.1065C>A	p.Leu355Leu	protein_coding_gene	PC1	1345848	2764788	0.248687	0.0544425
WBGene00000056	V_2609985	V	2609985	C	G	transcript	F53E10.2b.1	acr-17	F53E10.2	LOW	c.426-4C>G	NA	protein_coding_gene	PC1	1345848	2764788	0.248687	0.0544425
WBGene00000056	V_2611369	V	2611369	G	C	transcript	F53E10.2b.1	acr-17	F53E10.2	LOW	c.768G>C	p.Ser256Ser	protein_coding_gene	PC1	1345848	2764788	0.248687	0.0544425
WBGene00000056	V_2611324	V	2611324	T	A	transcript	F53E10.2b.1	acr-17	F53E10.2	LOW	c.723T>A	p.Ile241Ile	protein_coding_gene	PC1	1345848	2764788	0.248687	0.0544425
WBGene00000056	V_2612894	V	2612894	T	C	transcript	F53E10.2b.1	acr-17	F53E10.2	LOW	c.1092T>C	p.Phe364Phe	protein_coding_gene	PC1	1345848	2764788	0.248687	0.0544425
WBGene00000056	V_2612882	V	2612882	T	C	transcript	F53E10.2b.1	acr-17	F53E10.2	LOW	c.1080T>C	p.Asn360Asn	protein_coding_gene	PC1	1345848	2764788	0.248687	0.0544425
WBGene00000056	V_2609612	V	2609612	A	G	transcript	F53E10.2b.1	acr-17	F53E10.2	LOW	c.207A>G	p.Gln69Gln	protein_coding_gene	PC1	1345848	2764788	0.248687	0.0544425
WBGene00000056	V_2611348	V	2611348	G	T	transcript	F53E10.2b.1	acr-17	F53E10.2	LOW	c.747G>T	p.Leu249Leu	protein_coding_gene	PC1	1345848	2764788	0.248687	0.0544425
WBGene00000056	V_2609763	V	2609763	C	T	transcript	F53E10.2b.1	acr-17	F53E10.2	MODIFIER	c.347+11C>T	NA	protein_coding_gene	PC1	1345848	2764788	0.327829	0.255898
WBGene00000056	V_2613446	V	2613446	T	C	transcript	F53E10.2b.1	acr-17	F53E10.2	MODIFIER	c.1162-36T>C	NA	protein_coding_gene	PC1	1345848	2764788	0.210862	0.153855
WBGene00000056	V_2609773	V	2609773	T	C	transcript	F53E10.2b.1	acr-17	F53E10.2	MODIFIER	c.347+21T>C	NA	protein_coding_gene	PC1	1345848	2764788	0.232409	0.104015
WBGene00000056	V_2609761	V	2609761	G	A	transcript	F53E10.2b.1	acr-17	F53E10.2	MODIFIER	c.347+9G>A	NA	protein_coding_gene	PC1	1345848	2764788	0.232409	0.104015
WBGene00000056	V_2613466	V	2613466	T	C	transcript	F53E10.2b.1	acr-17	F53E10.2	MODIFIER	c.1162-16T>C	NA	protein_coding_gene	PC1	1345848	2764788	0.232409	0.104015
WBGene00000056	V_2609796	V	2609796	G	A	transcript	F53E10.2b.1	acr-17	F53E10.2	MODIFIER	c.347+44G>A	NA	protein_coding_gene	PC1	1345848	2764788	3.17249e-05	0.0642442
WBGene00000056	V_2609965	V	2609965	T	C	transcript	F53E10.2b.1	acr-17	F53E10.2	MODIFIER	c.425+19T>C	NA	protein_coding_gene	PC1	1345848	2764788	0.248687	0.0544425
WBGene00000056	V_2613436	V	2613436	A	G	transcript	F53E10.2b.1	acr-17	F53E10.2	MODIFIER	c.1162-46A>G	NA	protein_coding_gene	PC1	1345848	2764788	0.248687	0.0544425
WBGene00000056	V_2609781	V	2609781	T	A	transcript	F53E10.2b.1	acr-17	F53E10.2	MODIFIER	c.347+29T>A	NA	protein_coding_gene	PC1	1345848	2764788	0.248687	0.0544425
WBGene00000056	V_2609959	V	2609959	G	C	transcript	F53E10.2b.1	acr-17	F53E10.2	MODIFIER	c.425+13G>C	NA	protein_coding_gene	PC1	1345848	2764788	0.248687	0.0544425
WBGene00020343	V_1972402	V	1972402	A	C	transcript	T08B1.6.1	acs-3	T08B1.6	LOW	c.1116A>C	p.Leu372Leu	protein_coding_gene	PC1	1345848	2764788	0.187725	1.16074
WBGene00020343	V_1972552	V	1972552	T	A	transcript	T08B1.6.1	acs-3	T08B1.6	LOW	c.1266T>A	p.Thr422Thr	protein_coding_gene	PC1	1345848	2764788	0.0139907	0.645072
WBGene00020343	V_1974516	V	1974516	A	T	transcript	T08B1.6.1	acs-3	T08B1.6	LOW	c.*126A>T	NA	protein_coding_gene	PC1	1345848	2764788	0.000106372	0.641073
WBGene00020343	V_1971293	V	1971293	C	T	transcript	T08B1.6.1	acs-3	T08B1.6	LOW	c.798C>T	p.Tyr266Tyr	protein_coding_gene	PC1	1345848	2764788	0.0469099	0.412321
WBGene00020343	V_1971362	V	1971362	G	A	transcript	T08B1.6.1	acs-3	T08B1.6	LOW	c.867G>A	p.Gly289Gly	protein_coding_gene	PC1	1345848	2764788	0.0469099	0.412321
WBGene00020343	V_1971347	V	1971347	T	A	transcript	T08B1.6.1	acs-3	T08B1.6	LOW	c.852T>A	p.Thr284Thr	protein_coding_gene	PC1	1345848	2764788	0.0469099	0.412321
WBGene00020343	V_1971296	V	1971296	C	T	transcript	T08B1.6.1	acs-3	T08B1.6	LOW	c.801C>T	p.Phe267Phe	protein_coding_gene	PC1	1345848	2764788	0.0469099	0.412321
WBGene00020343	V_1971341	V	1971341	G	T	transcript	T08B1.6.1	acs-3	T08B1.6	LOW	c.846G>T	p.Thr282Thr	protein_coding_gene	PC1	1345848	2764788	0.0469099	0.412321
WBGene00020343	V_1971020	V	1971020	C	A	transcript	T08B1.6.1	acs-3	T08B1.6	LOW	c.525C>A	p.Thr175Thr	protein_coding_gene	PC1	1345848	2764788	0.0262902	0.00824838
WBGene00020343	V_1971109	V	1971109	G	A	transcript	T08B1.6.1	acs-3	T08B1.6	MODERATE	c.614G>A	p.Arg205Lys	protein_coding_gene	PC1	1345848	2764788	0.575915	1.72813
WBGene00020343	V_1972782	V	1972782	C	T	transcript	T08B1.6.1	acs-3	T08B1.6	MODIFIER	c.1456+40C>T	NA	protein_coding_gene	PC1	1345848	2764788	0.662933	2.12181
WBGene00020343	V_1970448	V	1970448	C	A	transcript	T08B1.6.1	acs-3	T08B1.6	MODIFIER	c.416+371C>A	NA	protein_coding_gene	PC1	1345848	2764788	0.662933	2.12181
WBGene00020343	V_1970557	V	1970557	C	T	transcript	T08B1.6.1	acs-3	T08B1.6	MODIFIER	c.417-355C>T	NA	protein_coding_gene	PC1	1345848	2764788	0.575915	1.72813
WBGene00020343	V_1972858	V	1972858	T	C	transcript	T08B1.6.1	acs-3	T08B1.6	MODIFIER	c.1456+116T>C	NA	protein_coding_gene	PC1	1345848	2764788	0.187725	1.16074
WBGene00020343	V_1970554	V	1970554	T	A	transcript	T08B1.6.1	acs-3	T08B1.6	MODIFIER	c.417-358T>A	NA	protein_coding_gene	PC1	1345848	2764788	0.187725	1.16074
WBGene00000108	V_1647276	V	1647276	G	A	transcript	K04F1.15.1	alh-2	K04F1.15	LOW	c.1140G>A	p.Gln380Gln	protein_coding_gene	PC1	1345848	2764788	0.660038	2.61556
WBGene00000108	V_1647039	V	1647039	T	A	transcript	K04F1.15.1	alh-2	K04F1.15	LOW	c.903T>A	p.Val301Val	protein_coding_gene	PC1	1345848	2764788	0.21971	1.67651
WBGene00000108	V_1645823	V	1645823	T	C	transcript	K04F1.15.1	alh-2	K04F1.15	LOW	c.561T>C	p.Leu187Leu	protein_coding_gene	PC1	1345848	2764788	0.21971	1.67651
WBGene00000108	V_1646994	V	1646994	G	A	transcript	K04F1.15.1	alh-2	K04F1.15	LOW	c.858G>A	p.Lys286Lys	protein_coding_gene	PC1	1345848	2764788	0.21971	1.67651
WBGene00000108	V_1647072	V	1647072	G	A	transcript	K04F1.15.1	alh-2	K04F1.15	LOW	c.936G>A	p.Gln312Gln	protein_coding_gene	PC1	1345848	2764788	0.21971	1.67651
WBGene00000108	V_1645811	V	1645811	T	C	transcript	K04F1.15.1	alh-2	K04F1.15	LOW	c.549T>C	p.Asn183Asn	protein_coding_gene	PC1	1345848	2764788	0.21971	1.67651
WBGene00000108	V_1647021	V	1647021	G	T	transcript	K04F1.15.1	alh-2	K04F1.15	LOW	c.885G>T	p.Ala295Ala	protein_coding_gene	PC1	1345848	2764788	0.21971	1.67651
WBGene00000108	V_1645850	V	1645850	A	C	transcript	K04F1.15.1	alh-2	K04F1.15	LOW	c.588A>C	p.Ala196Ala	protein_coding_gene	PC1	1345848	2764788	0.21971	1.67651
WBGene00000108	V_1647528	V	1647528	A	G	transcript	K04F1.15.1	alh-2	K04F1.15	LOW	c.1392A>G	p.Ser464Ser	protein_coding_gene	PC1	1345848	2764788	0.21971	1.67651
WBGene00000108	V_1647725	V	1647725	G	A	transcript	K04F1.15.1	alh-2	K04F1.15	LOW	c.1542G>A	p.Ser514Ser	protein_coding_gene	PC1	1345848	2764788	0.21971	1.67651
WBGene00000108	V_1647570	V	1647570	G	A	transcript	K04F1.15.1	alh-2	K04F1.15	LOW	c.1434G>A	p.Pro478Pro	protein_coding_gene	PC1	1345848	2764788	0.21971	1.67651
WBGene00000108	V_1647156	V	1647156	A	G	transcript	K04F1.15.1	alh-2	K04F1.15	LOW	c.1020A>G	p.Val340Val	protein_coding_gene	PC1	1345848	2764788	0.21971	1.67651
WBGene00000108	V_1647306	V	1647306	C	T	transcript	K04F1.15.1	alh-2	K04F1.15	LOW	c.1170C>T	p.Asp390Asp	protein_coding_gene	PC1	1345848	2764788	0.21971	1.67651
WBGene00000108	V_1647438	V	1647438	C	T	transcript	K04F1.15.1	alh-2	K04F1.15	LOW	c.1302C>T	p.Ala434Ala	protein_coding_gene	PC1	1345848	2764788	0.21971	1.67651
WBGene00000108	V_1644663	V	1644663	A	G	transcript	K04F1.15.1	alh-2	K04F1.15	LOW	c.45A>G	p.Gln15Gln	protein_coding_gene	PC1	1345848	2764788	0.21971	1.67651
WBGene00000108	V_1647716	V	1647716	A	G	transcript	K04F1.15.1	alh-2	K04F1.15	LOW	c.1533A>G	p.Gln511Gln	protein_coding_gene	PC1	1345848	2764788	0.21971	1.67651
WBGene00000108	V_1645805	V	1645805	G	T	transcript	K04F1.15.1	alh-2	K04F1.15	LOW	c.543G>T	p.Pro181Pro	protein_coding_gene	PC1	1345848	2764788	0.21971	1.67651
WBGene00000108	V_1647066	V	1647066	C	T	transcript	K04F1.15.1	alh-2	K04F1.15	LOW	c.930C>T	p.Phe310Phe	protein_coding_gene	PC1	1345848	2764788	0.21971	1.67651
WBGene00000108	V_1645910	V	1645910	C	T	transcript	K04F1.15.1	alh-2	K04F1.15	LOW	c.648C>T	p.Leu216Leu	protein_coding_gene	PC1	1345848	2764788	0.21971	1.67651
WBGene00000108	V_1646889	V	1646889	C	T	transcript	K04F1.15.1	alh-2	K04F1.15	LOW	c.753C>T	p.Asp251Asp	protein_coding_gene	PC1	1345848	2764788	0.21971	1.67651
WBGene00000108	V_1647552	V	1647552	T	G	transcript	K04F1.15.1	alh-2	K04F1.15	LOW	c.1416T>G	p.Val472Val	protein_coding_gene	PC1	1345848	2764788	0.21971	1.67651
WBGene00000108	V_1647192	V	1647192	C	T	transcript	K04F1.15.1	alh-2	K04F1.15	LOW	c.1056C>T	p.Asn352Asn	protein_coding_gene	PC1	1345848	2764788	0.21971	1.67651
WBGene00000108	V_1647273	V	1647273	T	C	transcript	K04F1.15.1	alh-2	K04F1.15	LOW	c.1137T>C	p.Ala379Ala	protein_coding_gene	PC1	1345848	2764788	0.21971	1.67651
WBGene00000108	V_1647024	V	1647024	T	C	transcript	K04F1.15.1	alh-2	K04F1.15	LOW	c.888T>C	p.Asp296Asp	protein_coding_gene	PC1	1345848	2764788	0.21971	1.67651
WBGene00000108	V_1647522	V	1647522	G	A	transcript	K04F1.15.1	alh-2	K04F1.15	LOW	c.1386G>A	p.Ala462Ala	protein_coding_gene	PC1	1345848	2764788	0.21971	1.67651
WBGene00000108	V_1645814	V	1645814	C	T	transcript	K04F1.15.1	alh-2	K04F1.15	LOW	c.552C>T	p.Phe184Phe	protein_coding_gene	PC1	1345848	2764788	0.21971	1.67651
WBGene00000108	V_1644847	V	1644847	T	C	transcript	K04F1.15.1	alh-2	K04F1.15	LOW	c.111T>C	p.Phe37Phe	protein_coding_gene	PC1	1345848	2764788	0.21971	1.67651
WBGene00000108	V_1647519	V	1647519	C	A	transcript	K04F1.15.1	alh-2	K04F1.15	LOW	c.1383C>A	p.Arg461Arg	protein_coding_gene	PC1	1345848	2764788	0.21971	1.67651
WBGene00000108	V_1647036	V	1647036	G	T	transcript	K04F1.15.1	alh-2	K04F1.15	LOW	c.900G>T	p.Ala300Ala	protein_coding_gene	PC1	1345848	2764788	0.21971	1.67651
WBGene00000108	V_1647477	V	1647477	C	A	transcript	K04F1.15.1	alh-2	K04F1.15	LOW	c.1341C>A	p.Thr447Thr	protein_coding_gene	PC1	1345848	2764788	0.21971	1.67651
WBGene00000108	V_1647713	V	1647713	A	G	transcript	K04F1.15.1	alh-2	K04F1.15	LOW	c.1530A>G	p.Pro510Pro	protein_coding_gene	PC1	1345848	2764788	0.21971	1.67651
WBGene00000108	V_1646859	V	1646859	T	C	transcript	K04F1.15.1	alh-2	K04F1.15	LOW	c.723T>C	p.Asp241Asp	protein_coding_gene	PC1	1345848	2764788	0.21971	1.67651
WBGene00000108	V_1647141	V	1647141	G	A	transcript	K04F1.15.1	alh-2	K04F1.15	LOW	c.1005G>A	p.Lys335Lys	protein_coding_gene	PC1	1345848	2764788	0.21971	1.67651
WBGene00000108	V_1647309	V	1647309	G	A	transcript	K04F1.15.1	alh-2	K04F1.15	LOW	c.1173G>A	p.Gln391Gln	protein_coding_gene	PC1	1345848	2764788	0.21971	1.67651
WBGene00000108	V_1644865	V	1644865	A	T	transcript	K04F1.15.1	alh-2	K04F1.15	LOW	c.129A>T	p.Val43Val	protein_coding_gene	PC1	1345848	2764788	0.21971	1.67651
WBGene00000108	V_1645862	V	1645862	G	A	transcript	K04F1.15.1	alh-2	K04F1.15	LOW	c.600G>A	p.Gly200Gly	protein_coding_gene	PC1	1345848	2764788	0.21971	1.67651
WBGene00000108	V_1647219	V	1647219	A	G	transcript	K04F1.15.1	alh-2	K04F1.15	LOW	c.1083A>G	p.Glu361Glu	protein_coding_gene	PC1	1345848	2764788	0.0159508	1.51736
WBGene00000108	V_1647204	V	1647204	T	A	transcript	K04F1.15.1	alh-2	K04F1.15	LOW	c.1068T>A	p.Gly356Gly	protein_coding_gene	PC1	1345848	2764788	0.0159508	1.51736
WBGene00000108	V_1647207	V	1647207	G	C	transcript	K04F1.15.1	alh-2	K04F1.15	LOW	c.1071G>C	p.Pro357Pro	protein_coding_gene	PC1	1345848	2764788	0.0139907	1.11272
WBGene00000108	V_1647346	V	1647346	A	C	transcript	K04F1.15.1	alh-2	K04F1.15	MODERATE	c.1210A>C	p.Asn404His	protein_coding_gene	PC1	1345848	2764788	0.21971	1.67651
WBGene00000108	V_1647162	V	1647162	A	C	transcript	K04F1.15.1	alh-2	K04F1.15	MODERATE	c.1026A>C	p.Lys342Asn	protein_coding_gene	PC1	1345848	2764788	0.21971	1.67651
WBGene00000108	V_1647046	V	1647046	T	G	transcript	K04F1.15.1	alh-2	K04F1.15	MODERATE	c.910T>G	p.Ser304Ala	protein_coding_gene	PC1	1345848	2764788	0.21971	1.67651
WBGene00000108	V_1645947	V	1645947	G	A	transcript	K04F1.15.1	alh-2	K04F1.15	MODERATE	c.685G>A	p.Glu229Lys	protein_coding_gene	PC1	1345848	2764788	0.21971	1.67651
WBGene00000108	V_1647030	V	1647030	G	T	transcript	K04F1.15.1	alh-2	K04F1.15	MODERATE	c.894G>T	p.Glu298Asp	protein_coding_gene	PC1	1345848	2764788	0.21971	1.67651
WBGene00000108	V_1647314	V	1647314	A	T	transcript	K04F1.15.1	alh-2	K04F1.15	MODERATE	c.1178A>T	p.Tyr393Phe	protein_coding_gene	PC1	1345848	2764788	0.21971	1.67651
WBGene00000108	V_1647231	V	1647231	G	C	transcript	K04F1.15.1	alh-2	K04F1.15	MODERATE	c.1095G>C	p.Glu365Asp	protein_coding_gene	PC1	1345848	2764788	0.0159508	1.51736
WBGene00000108	V_1644872	V	1644872	A	G	transcript	K04F1.15.1	alh-2	K04F1.15	MODERATE	c.136A>G	p.Lys46Glu	protein_coding_gene	PC1	1345848	2764788	0.0169674	0.440719
WBGene00000108	V_1644615	V	1644615	A	T	transcript	K04F1.15.1	alh-2	K04F1.15	MODIFIER	c.12-15A>T	NA	protein_coding_gene	PC1	1345848	2764788	0.21971	1.67651
WBGene00000108	V_1647631	V	1647631	T	A	transcript	K04F1.15.1	alh-2	K04F1.15	MODIFIER	c.1457-9T>A	NA	protein_coding_gene	PC1	1345848	2764788	0.21971	1.67651
WBGene00000108	V_1646723	V	1646723	C	A	transcript	K04F1.15.1	alh-2	K04F1.15	MODIFIER	c.710-123C>A	NA	protein_coding_gene	PC1	1345848	2764788	0.21971	1.67651
WBGene00000108	V_1646702	V	1646702	C	T	transcript	K04F1.15.1	alh-2	K04F1.15	MODIFIER	c.710-144C>T	NA	protein_coding_gene	PC1	1345848	2764788	0.21971	1.67651
WBGene00000108	V_1644619	V	1644619	T	A	transcript	K04F1.15.1	alh-2	K04F1.15	MODIFIER	c.12-11T>A	NA	protein_coding_gene	PC1	1345848	2764788	0.21971	1.67651
WBGene00000108	V_1646377	V	1646377	A	C	transcript	K04F1.15.1	alh-2	K04F1.15	MODIFIER	c.709+406A>C	NA	protein_coding_gene	PC1	1345848	2764788	0.21971	1.67651
WBGene00000108	V_1646651	V	1646651	T	C	transcript	K04F1.15.1	alh-2	K04F1.15	MODIFIER	c.710-195T>C	NA	protein_coding_gene	PC1	1345848	2764788	0.21971	1.67651
WBGene00000108	V_1646647	V	1646647	T	C	transcript	K04F1.15.1	alh-2	K04F1.15	MODIFIER	c.710-199T>C	NA	protein_coding_gene	PC1	1345848	2764788	0.21971	1.67651
WBGene00000108	V_1646709	V	1646709	AT	A	transcript	K04F1.15.1	alh-2	K04F1.15	MODIFIER	c.710-136delT	NA	protein_coding_gene	PC1	1345848	2764788	NA	1.50019
WBGene00000108	V_1644780	V	1644780	G	A	transcript	K04F1.15.1	alh-2	K04F1.15	MODIFIER	c.105+57G>A	NA	protein_coding_gene	PC1	1345848	2764788	0.0139907	1.11272
WBGene00000108	V_1646665	V	1646665	A	T	transcript	K04F1.15.1	alh-2	K04F1.15	MODIFIER	c.710-181A>T	NA	protein_coding_gene	PC1	1345848	2764788	0.196658	0.989335
WBGene00000108	V_1646714	V	1646714	T	A	transcript	K04F1.15.1	alh-2	K04F1.15	MODIFIER	c.710-132T>A	NA	protein_coding_gene	PC1	1345848	2764788	0.01427	0.353465
WBGene00000111	V_1999224	V	1999224	C	T	transcript	T08B1.3.1	alh-5	T08B1.3	LOW	c.246G>A	p.Lys82Lys	protein_coding_gene	PC1	1345848	2764788	0.555059	2.30404
WBGene00000111	V_1999179	V	1999179	T	C	transcript	T08B1.3.1	alh-5	T08B1.3	LOW	c.291A>G	p.Lys97Lys	protein_coding_gene	PC1	1345848	2764788	0.555059	2.30404
WBGene00000111	V_1999221	V	1999221	T	C	transcript	T08B1.3.1	alh-5	T08B1.3	LOW	c.249A>G	p.Pro83Pro	protein_coding_gene	PC1	1345848	2764788	0.555059	2.30404
WBGene00000111	V_1999248	V	1999248	T	C	transcript	T08B1.3.1	alh-5	T08B1.3	LOW	c.222A>G	p.Leu74Leu	protein_coding_gene	PC1	1345848	2764788	0.555059	2.30404
WBGene00000111	V_1999260	V	1999260	A	G	transcript	T08B1.3.1	alh-5	T08B1.3	LOW	c.210T>C	p.Ile70Ile	protein_coding_gene	PC1	1345848	2764788	0.555059	2.30404
WBGene00000111	V_1999188	V	1999188	A	T	transcript	T08B1.3.1	alh-5	T08B1.3	LOW	c.282T>A	p.Pro94Pro	protein_coding_gene	PC1	1345848	2764788	0.555059	2.30404
WBGene00000111	V_1999218	V	1999218	T	G	transcript	T08B1.3.1	alh-5	T08B1.3	LOW	c.252A>C	p.Thr84Thr	protein_coding_gene	PC1	1345848	2764788	0.555059	2.30404
WBGene00000111	V_1999212	V	1999212	A	C	transcript	T08B1.3.1	alh-5	T08B1.3	LOW	c.258T>G	p.Val86Val	protein_coding_gene	PC1	1345848	2764788	0.555059	2.30404
WBGene00000111	V_1996661	V	1996661	A	G	transcript	T08B1.3.1	alh-5	T08B1.3	LOW	c.876-3T>C	NA	protein_coding_gene	PC1	1345848	2764788	0.255398	1.87767
WBGene00000111	V_1996604	V	1996604	T	C	transcript	T08B1.3.1	alh-5	T08B1.3	LOW	c.930A>G	p.Glu310Glu	protein_coding_gene	PC1	1345848	2764788	0.0139907	0.376644
WBGene00000111	V_1996270	V	1996270	G	A	transcript	T08B1.3.1	alh-5	T08B1.3	LOW	c.1215C>T	p.Phe405Phe	protein_coding_gene	PC1	1345848	2764788	0.0137527	0.217534
WBGene00000111	V_1999565	V	1999565	C	T	transcript	T08B1.3.1	alh-5	T08B1.3	MODERATE	c.14G>A	p.Arg5Gln	protein_coding_gene	PC1	1345848	2764788	0.255398	1.87767
WBGene00000111	V_1999163	V	1999163	C	T	transcript	T08B1.3.1	alh-5	T08B1.3	MODERATE	c.307G>A	p.Asp103Asn	protein_coding_gene	PC1	1345848	2764788	0.590346	1.84175
WBGene00000111	V_1997950	V	1997950	A	T	transcript	T08B1.3.1	alh-5	T08B1.3	MODIFIER	c.777+685T>A	NA	protein_coding_gene	PC1	1345848	2764788	0.522604	3.99507
WBGene00000111	V_1997803	V	1997803	A	T	transcript	T08B1.3.1	alh-5	T08B1.3	MODIFIER	c.777+832T>A	NA	protein_coding_gene	PC1	1345848	2764788	0.522604	3.99507
WBGene00000111	V_1998557	V	1998557	A	G	transcript	T08B1.3.1	alh-5	T08B1.3	MODIFIER	c.777+78T>C	NA	protein_coding_gene	PC1	1345848	2764788	0.372034	2.57179
WBGene00000111	V_1997999	V	1997999	C	A	transcript	T08B1.3.1	alh-5	T08B1.3	MODIFIER	c.777+636G>T	NA	protein_coding_gene	PC1	1345848	2764788	0.504099	2.41638
WBGene00000111	V_1996950	V	1996950	A	T	transcript	T08B1.3.1	alh-5	T08B1.3	MODIFIER	c.778-142T>A	NA	protein_coding_gene	PC1	1345848	2764788	0.504099	2.41638
WBGene00000111	V_1996168	V	1996168	C	T	transcript	T08B1.3.1	alh-5	T08B1.3	MODIFIER	c.*3G>A	NA	protein_coding_gene	PC1	1345848	2764788	0.255398	1.87767
WBGene00000111	V_1997997	V	1997997	A	G	transcript	T08B1.3.1	alh-5	T08B1.3	MODIFIER	c.777+638T>C	NA	protein_coding_gene	PC1	1345848	2764788	0.255398	1.87767
WBGene00000111	V_1998430	V	1998430	A	C	transcript	T08B1.3.1	alh-5	T08B1.3	MODIFIER	c.777+205T>G	NA	protein_coding_gene	PC1	1345848	2764788	0.369647	1.72247
WBGene00000111	V_1998548	V	1998548	T	C	transcript	T08B1.3.1	alh-5	T08B1.3	MODIFIER	c.777+87A>G	NA	protein_coding_gene	PC1	1345848	2764788	0.248313	1.6012
WBGene00000111	V_1997397	V	1997397	TTTGTAC	T	transcript	T08B1.3.1	alh-5	T08B1.3	MODIFIER	c.778-595_778-590delGTACAA	NA	protein_coding_gene	PC1	1345848	2764788	NA	0.562665
WBGene00000111	V_1997785	V	1997785	A	T	transcript	T08B1.3.1	alh-5	T08B1.3	MODIFIER	c.777+850T>A	NA	protein_coding_gene	PC1	1345848	2764788	0.0139907	0.376644
WBGene00000111	V_1997859	V	1997859	GGC	G	transcript	T08B1.3.1	alh-5	T08B1.3	MODIFIER	c.777+774_777+775delGC	NA	protein_coding_gene	PC1	1345848	2764788	NA	0.376644
WBGene00000111	V_1997862	V	1997862	ATTTTTCCAAAATTTTGT	A	transcript	T08B1.3.1	alh-5	T08B1.3	MODIFIER	c.777+756_777+772delACAAAATTTTGGAAAAA	NA	protein_coding_gene	PC1	1345848	2764788	NA	0.376644
WBGene00000111	V_1997218	V	1997218	A	T	transcript	T08B1.3.1	alh-5	T08B1.3	MODIFIER	c.778-410T>A	NA	protein_coding_gene	PC1	1345848	2764788	3.17249e-05	0.25577
WBGene00020955	V_2659041	V	2659041	A	G	transcript	W02G9.5a.1	angl-1	W02G9.5	LOW	c.918A>G	p.Leu306Leu	protein_coding_gene	PC1	1345848	2764788	0.00582975	1.13479
WBGene00020955	V_2654778	V	2654778	T	C	transcript	W02G9.5a.1	angl-1	W02G9.5	LOW	c.420-3T>C	NA	protein_coding_gene	PC1	1345848	2764788	0.3107	1.06259
WBGene00020955	V_2659023	V	2659023	G	A	transcript	W02G9.5a.1	angl-1	W02G9.5	LOW	c.900G>A	p.Gln300Gln	protein_coding_gene	PC1	1345848	2764788	0.352028	0.368267
WBGene00020955	V_2662534	V	2662534	A	T	transcript	W02G9.5a.1	angl-1	W02G9.5	MODERATE	c.1442A>T	p.Lys481Ile	protein_coding_gene	PC1	1345848	2764788	0.407473	0.782344
WBGene00020955	V_2658946	V	2658946	A	C	transcript	W02G9.5a.1	angl-1	W02G9.5	MODERATE	c.823A>C	p.Lys275Gln	protein_coding_gene	PC1	1345848	2764788	0.177546	0.147757
WBGene00020955	V_2658844	V	2658844	A	G	transcript	W02G9.5a.1	angl-1	W02G9.5	MODERATE	c.721A>G	p.Asn241Asp	protein_coding_gene	PC1	1345848	2764788	0.177546	0.147757
WBGene00020955	V_2659028	V	2659028	C	G	transcript	W02G9.5a.1	angl-1	W02G9.5	MODERATE	c.905C>G	p.Ser302Cys	protein_coding_gene	PC1	1345848	2764788	0.0200082	0.107408
WBGene00020955	V_2653466	V	2653466	C	T	transcript	W02G9.5a.1	angl-1	W02G9.5	MODERATE	c.194C>T	p.Ala65Val	protein_coding_gene	PC1	1345848	2764788	0.285132	0.0742773
WBGene00020955	V_2654755	V	2654755	G	A	transcript	W02G9.5a.1	angl-1	W02G9.5	MODIFIER	c.420-26G>A	NA	protein_coding_gene	PC1	1345848	2764788	0.265823	0.694225
WBGene00020955	V_2653272	V	2653272	T	C	transcript	W02G9.5a.1	angl-1	W02G9.5	MODIFIER	c.180+10T>C	NA	protein_coding_gene	PC1	1345848	2764788	0.305606	0.0277454
WBGene00020955	V_2653310	V	2653310	A	G	transcript	W02G9.5a.1	angl-1	W02G9.5	MODIFIER	c.180+48A>G	NA	protein_coding_gene	PC1	1345848	2764788	0.305606	0.0277454
WBGene00020955	V_2653396	V	2653396	G	A	transcript	W02G9.5a.1	angl-1	W02G9.5	MODIFIER	c.181-57G>A	NA	protein_coding_gene	PC1	1345848	2764788	0.305606	0.0277454
WBGene00008821	V_16050101	V	16050101	C	CA	transcript	F14H3.2.1	best-12	F14H3.2	HIGH	c.276dupA	p.Asp93fs	protein_coding_gene	PC1	15775895	18065050	NA	0.763776
WBGene00008821	V_16050098	V	16050098	TC	T	transcript	F14H3.2.1	best-12	F14H3.2	HIGH	c.273delC	p.Ala92fs	protein_coding_gene	PC1	15775895	18065050	NA	0.763776
WBGene00008821	V_16050101	V	16050101	C	CA	transcript	F14H3.2.1	best-12	F14H3.2	HIGH	c.276dupA	p.Asp93fs	protein_coding_gene	Slope	15660911	17615557	NA	0.519499
WBGene00008821	V_16050098	V	16050098	TC	T	transcript	F14H3.2.1	best-12	F14H3.2	HIGH	c.273delC	p.Ala92fs	protein_coding_gene	Slope	15660911	17615557	NA	0.519499
WBGene00008821	V_16050303	V	16050303	C	T	transcript	F14H3.2.1	best-12	F14H3.2	LOW	c.405C>T	p.Asp135Asp	protein_coding_gene	PC1	15775895	18065050	0.444444	3.51915
WBGene00008821	V_16050428	V	16050428	C	A	transcript	F14H3.2.1	best-12	F14H3.2	LOW	c.526+4C>A	NA	protein_coding_gene	PC1	15775895	18065050	0.444444	3.51915
WBGene00008821	V_16051260	V	16051260	T	C	transcript	F14H3.2.1	best-12	F14H3.2	LOW	c.1056T>C	p.Tyr352Tyr	protein_coding_gene	Slope	15660911	17615557	0.0355175	1.72268
WBGene00008821	V_16050303	V	16050303	C	T	transcript	F14H3.2.1	best-12	F14H3.2	LOW	c.405C>T	p.Asp135Asp	protein_coding_gene	Slope	15660911	17615557	0.466338	1.56537
WBGene00008821	V_16050428	V	16050428	C	A	transcript	F14H3.2.1	best-12	F14H3.2	LOW	c.526+4C>A	NA	protein_coding_gene	Slope	15660911	17615557	0.466338	1.56537
WBGene00008821	V_16051260	V	16051260	T	C	transcript	F14H3.2.1	best-12	F14H3.2	LOW	c.1056T>C	p.Tyr352Tyr	protein_coding_gene	PC1	15775895	18065050	0.0372671	0.695043
WBGene00008821	V_16050126	V	16050126	A	G	transcript	F14H3.2.1	best-12	F14H3.2	LOW	c.300A>G	p.Glu100Glu	protein_coding_gene	PC1	15775895	18065050	0.015873	0.678734
WBGene00008821	V_16050093	V	16050093	A	G	transcript	F14H3.2.1	best-12	F14H3.2	LOW	c.267A>G	p.Ala89Ala	protein_coding_gene	PC1	15775895	18065050	0.015873	0.678734
WBGene00008821	V_16049924	V	16049924	T	C	transcript	F14H3.2.1	best-12	F14H3.2	LOW	c.144T>C	p.Phe48Phe	protein_coding_gene	PC1	15775895	18065050	0.015873	0.678734
WBGene00008821	V_16049834	V	16049834	T	C	transcript	F14H3.2.1	best-12	F14H3.2	LOW	c.61-7T>C	NA	protein_coding_gene	PC1	15775895	18065050	0.015873	0.678734
WBGene00008821	V_16050126	V	16050126	A	G	transcript	F14H3.2.1	best-12	F14H3.2	LOW	c.300A>G	p.Glu100Glu	protein_coding_gene	Slope	15660911	17615557	0.0713939	0.549218
WBGene00008821	V_16049924	V	16049924	T	C	transcript	F14H3.2.1	best-12	F14H3.2	LOW	c.144T>C	p.Phe48Phe	protein_coding_gene	Slope	15660911	17615557	0.0713939	0.549218
WBGene00008821	V_16050093	V	16050093	A	G	transcript	F14H3.2.1	best-12	F14H3.2	LOW	c.267A>G	p.Ala89Ala	protein_coding_gene	Slope	15660911	17615557	0.0713939	0.549218
WBGene00008821	V_16049834	V	16049834	T	C	transcript	F14H3.2.1	best-12	F14H3.2	LOW	c.61-7T>C	NA	protein_coding_gene	Slope	15660911	17615557	0.0713939	0.549218
WBGene00008821	V_16050544	V	16050544	A	G	transcript	F14H3.2.1	best-12	F14H3.2	MODERATE	c.604A>G	p.Thr202Ala	protein_coding_gene	PC1	15775895	18065050	0.0126358	0.763776
WBGene00008821	V_16049897	V	16049897	G	C	transcript	F14H3.2.1	best-12	F14H3.2	MODERATE	c.117G>C	p.Met39Ile	protein_coding_gene	PC1	15775895	18065050	0.0126358	0.763776
WBGene00008821	V_16050518	V	16050518	C	T	transcript	F14H3.2.1	best-12	F14H3.2	MODERATE	c.578C>T	p.Thr193Ile	protein_coding_gene	PC1	15775895	18065050	0.015873	0.678734
WBGene00008821	V_16050518	V	16050518	C	T	transcript	F14H3.2.1	best-12	F14H3.2	MODERATE	c.578C>T	p.Thr193Ile	protein_coding_gene	Slope	15660911	17615557	0.0713939	0.549218
WBGene00008821	V_16050544	V	16050544	A	G	transcript	F14H3.2.1	best-12	F14H3.2	MODERATE	c.604A>G	p.Thr202Ala	protein_coding_gene	Slope	15660911	17615557	0.0945826	0.519499
WBGene00008821	V_16049897	V	16049897	G	C	transcript	F14H3.2.1	best-12	F14H3.2	MODERATE	c.117G>C	p.Met39Ile	protein_coding_gene	Slope	15660911	17615557	0.0945826	0.519499
WBGene00008821	V_16049980	V	16049980	C	A	transcript	F14H3.2.1	best-12	F14H3.2	MODIFIER	c.182+18C>A	NA	protein_coding_gene	PC1	15775895	18065050	0.0126358	0.763776
WBGene00008821	V_16050160	V	16050160	C	T	transcript	F14H3.2.1	best-12	F14H3.2	MODIFIER	c.320+14C>T	NA	protein_coding_gene	PC1	15775895	18065050	0.0126358	0.763776
WBGene00008821	V_16049627	V	16049627	G	T	transcript	F14H3.2.1	best-12	F14H3.2	MODIFIER	c.1-106G>T	NA	protein_coding_gene	PC1	15775895	18065050	0.0126358	0.763776
WBGene00008821	V_16050190	V	16050190	T	C	transcript	F14H3.2.1	best-12	F14H3.2	MODIFIER	c.321-29T>C	NA	protein_coding_gene	PC1	15775895	18065050	0.0126358	0.763776
WBGene00008821	V_16049828	V	16049828	A	G	transcript	F14H3.2.1	best-12	F14H3.2	MODIFIER	c.61-13A>G	NA	protein_coding_gene	PC1	15775895	18065050	0.0126358	0.763776
WBGene00008821	V_16050625	V	16050625	T	A	transcript	F14H3.2.1	best-12	F14H3.2	MODIFIER	c.642+43T>A	NA	protein_coding_gene	PC1	15775895	18065050	0.019404	0.711522
WBGene00008821	V_16049980	V	16049980	C	A	transcript	F14H3.2.1	best-12	F14H3.2	MODIFIER	c.182+18C>A	NA	protein_coding_gene	Slope	15660911	17615557	0.0945826	0.519499
WBGene00008821	V_16049627	V	16049627	G	T	transcript	F14H3.2.1	best-12	F14H3.2	MODIFIER	c.1-106G>T	NA	protein_coding_gene	Slope	15660911	17615557	0.0945826	0.519499
WBGene00008821	V_16050160	V	16050160	C	T	transcript	F14H3.2.1	best-12	F14H3.2	MODIFIER	c.320+14C>T	NA	protein_coding_gene	Slope	15660911	17615557	0.0945826	0.519499
WBGene00008821	V_16050190	V	16050190	T	C	transcript	F14H3.2.1	best-12	F14H3.2	MODIFIER	c.321-29T>C	NA	protein_coding_gene	Slope	15660911	17615557	0.0945826	0.519499
WBGene00008821	V_16049828	V	16049828	A	G	transcript	F14H3.2.1	best-12	F14H3.2	MODIFIER	c.61-13A>G	NA	protein_coding_gene	Slope	15660911	17615557	0.0945826	0.519499
WBGene00008821	V_16050625	V	16050625	T	A	transcript	F14H3.2.1	best-12	F14H3.2	MODIFIER	c.642+43T>A	NA	protein_coding_gene	Slope	15660911	17615557	0.0520296	0.174695
WBGene00017723	V_2116598	V	2116598	G	T	transcript	F22F7.6.1	bgnt-1.2	F22F7.6	LOW	c.512-7C>A	NA	protein_coding_gene	PC1	1345848	2764788	0.825196	1.50201
WBGene00017723	V_2115761	V	2115761	A	G	transcript	F22F7.6.1	bgnt-1.2	F22F7.6	LOW	c.1083T>C	p.Thr361Thr	protein_coding_gene	PC1	1345848	2764788	0.287975	0.732354
WBGene00017723	V_2115672	V	2115672	AT	A	transcript	F22F7.6.1	bgnt-1.2	F22F7.6	MODIFIER	c.1139+32delA	NA	protein_coding_gene	PC1	1345848	2764788	NA	0.877684
WBGene00017723	V_2116882	V	2116882	T	C	transcript	F22F7.6.1	bgnt-1.2	F22F7.6	MODIFIER	c.512-291A>G	NA	protein_coding_gene	PC1	1345848	2764788	0.0362486	0.390589
WBGene00017723	V_2115669	V	2115669	A	G	transcript	F22F7.6.1	bgnt-1.2	F22F7.6	MODIFIER	c.1140-33T>C	NA	protein_coding_gene	PC1	1345848	2764788	0.023115	0.160666
WBGene00009032	V_16254497	V	16254497	T	A	transcript	F21H7.10.1	bgnt-1.3	F21H7.10	LOW	c.1125A>T	p.Ile375Ile	protein_coding_gene	Slope	15660911	17615557	0.00309297	0.587639
WBGene00009032	V_16254923	V	16254923	C	T	transcript	F21H7.10.1	bgnt-1.3	F21H7.10	LOW	c.912G>A	p.Gly304Gly	protein_coding_gene	Slope	15660911	17615557	0.0136712	0.58145
WBGene00009032	V_16255860	V	16255860	T	C	transcript	F21H7.10.1	bgnt-1.3	F21H7.10	LOW	c.243A>G	p.Glu81Glu	protein_coding_gene	Slope	15660911	17615557	0.0136712	0.58145
WBGene00009032	V_16255013	V	16255013	G	A	transcript	F21H7.10.1	bgnt-1.3	F21H7.10	LOW	c.825-3C>T	NA	protein_coding_gene	Slope	15660911	17615557	0.0136712	0.58145
WBGene00009032	V_16254671	V	16254671	A	G	transcript	F21H7.10.1	bgnt-1.3	F21H7.10	LOW	c.996T>C	p.Ala332Ala	protein_coding_gene	Slope	15660911	17615557	0.0289531	0.527386
WBGene00009032	V_16254551	V	16254551	A	G	transcript	F21H7.10.1	bgnt-1.3	F21H7.10	LOW	c.1071T>C	p.His357His	protein_coding_gene	Slope	15660911	17615557	0.0289531	0.527386
WBGene00009032	V_16254998	V	16254998	A	G	transcript	F21H7.10.1	bgnt-1.3	F21H7.10	LOW	c.837T>C	p.Phe279Phe	protein_coding_gene	Slope	15660911	17615557	0.0289531	0.527386
WBGene00009032	V_16255887	V	16255887	G	A	transcript	F21H7.10.1	bgnt-1.3	F21H7.10	LOW	c.216C>T	p.Ile72Ile	protein_coding_gene	Slope	15660911	17615557	0.0289531	0.527386
WBGene00009032	V_16255018	V	16255018	G	A	transcript	F21H7.10.1	bgnt-1.3	F21H7.10	LOW	c.825-8C>T	NA	protein_coding_gene	Slope	15660911	17615557	0.0289531	0.527386
WBGene00009032	V_16254512	V	16254512	C	T	transcript	F21H7.10.1	bgnt-1.3	F21H7.10	LOW	c.1110G>A	p.Lys370Lys	protein_coding_gene	Slope	15660911	17615557	0.0289531	0.527386
WBGene00009032	V_16254523	V	16254523	T	G	transcript	F21H7.10.1	bgnt-1.3	F21H7.10	LOW	c.1099A>C	p.Arg367Arg	protein_coding_gene	Slope	15660911	17615557	0.0289531	0.527386
WBGene00009032	V_16254473	V	16254473	G	A	transcript	F21H7.10.1	bgnt-1.3	F21H7.10	LOW	c.1149C>T	p.His383His	protein_coding_gene	Slope	15660911	17615557	0.0289531	0.527386
WBGene00009032	V_16255926	V	16255926	G	A	transcript	F21H7.10.1	bgnt-1.3	F21H7.10	LOW	c.177C>T	p.Tyr59Tyr	protein_coding_gene	Slope	15660911	17615557	0.0289531	0.527386
WBGene00009032	V_16255884	V	16255884	C	A	transcript	F21H7.10.1	bgnt-1.3	F21H7.10	LOW	c.219G>T	p.Ala73Ala	protein_coding_gene	Slope	15660911	17615557	0.0289531	0.527386
WBGene00009032	V_16254563	V	16254563	C	T	transcript	F21H7.10.1	bgnt-1.3	F21H7.10	LOW	c.1059G>A	p.Gly353Gly	protein_coding_gene	Slope	15660911	17615557	0.0289531	0.527386
WBGene00009032	V_16254677	V	16254677	G	A	transcript	F21H7.10.1	bgnt-1.3	F21H7.10	LOW	c.990C>T	p.Tyr330Tyr	protein_coding_gene	Slope	15660911	17615557	0.0289531	0.527386
WBGene00009032	V_16255658	V	16255658	A	T	transcript	F21H7.10.1	bgnt-1.3	F21H7.10	LOW	c.393T>A	p.Leu131Leu	protein_coding_gene	Slope	15660911	17615557	0.0136712	0.518462
WBGene00009032	V_16254989	V	16254989	G	T	transcript	F21H7.10.1	bgnt-1.3	F21H7.10	LOW	c.846C>A	p.Arg282Arg	protein_coding_gene	Slope	15660911	17615557	0.00309297	0.241085
WBGene00009032	V_16254380	V	16254380	G	A	transcript	F21H7.10.1	bgnt-1.3	F21H7.10	LOW	c.1191C>T	p.Ile397Ile	protein_coding_gene	Slope	15660911	17615557	0.00309297	0.241085
WBGene00009032	V_16254589	V	16254589	G	GGAATT	transcript	F21H7.10.1	bgnt-1.3	F21H7.10	LOW	c.1036-4_1036-3insAATTC	NA	protein_coding_gene	Slope	15660911	17615557	NA	0.241085
WBGene00009032	V_16255053	V	16255053	T	C	transcript	F21H7.10.1	bgnt-1.3	F21H7.10	LOW	c.824+4A>G	NA	protein_coding_gene	Slope	15660911	17615557	0.00309297	0.241085
WBGene00009032	V_16255007	V	16255007	A	G	transcript	F21H7.10.1	bgnt-1.3	F21H7.10	LOW	c.828T>C	p.Thr276Thr	protein_coding_gene	Slope	15660911	17615557	0.00309297	0.241085
WBGene00009032	V_16255941	V	16255941	G	A	transcript	F21H7.10.1	bgnt-1.3	F21H7.10	LOW	c.162C>T	p.Gly54Gly	protein_coding_gene	PC1	15775895	18065050	0.00540358	0.237364
WBGene00009032	V_16255049	V	16255049	TA	T	transcript	F21H7.10.1	bgnt-1.3	F21H7.10	LOW	c.824+7delT	NA	protein_coding_gene	PC1	15775895	18065050	NA	0.237364
WBGene00009032	V_16255736	V	16255736	A	T	transcript	F21H7.10.1	bgnt-1.3	F21H7.10	LOW	c.315T>A	p.Thr105Thr	protein_coding_gene	PC1	15775895	18065050	0.00540358	0.237364
WBGene00009032	V_16254560	V	16254560	G	A	transcript	F21H7.10.1	bgnt-1.3	F21H7.10	LOW	c.1062C>T	p.Tyr354Tyr	protein_coding_gene	PC1	15775895	18065050	0.00540358	0.237364
WBGene00009032	V_16254575	V	16254575	G	T	transcript	F21H7.10.1	bgnt-1.3	F21H7.10	LOW	c.1047C>A	p.Leu349Leu	protein_coding_gene	PC1	15775895	18065050	0.00540358	0.237364
WBGene00009032	V_16254566	V	16254566	T	A	transcript	F21H7.10.1	bgnt-1.3	F21H7.10	LOW	c.1056A>T	p.Ala352Ala	protein_coding_gene	PC1	15775895	18065050	0.00540358	0.237364
WBGene00009032	V_16255941	V	16255941	G	A	transcript	F21H7.10.1	bgnt-1.3	F21H7.10	LOW	c.162C>T	p.Gly54Gly	protein_coding_gene	Slope	15660911	17615557	0.0136712	0.201877
WBGene00009032	V_16255049	V	16255049	TA	T	transcript	F21H7.10.1	bgnt-1.3	F21H7.10	LOW	c.824+7delT	NA	protein_coding_gene	Slope	15660911	17615557	NA	0.201877
WBGene00009032	V_16254575	V	16254575	G	T	transcript	F21H7.10.1	bgnt-1.3	F21H7.10	LOW	c.1047C>A	p.Leu349Leu	protein_coding_gene	Slope	15660911	17615557	0.0136712	0.201877
WBGene00009032	V_16255736	V	16255736	A	T	transcript	F21H7.10.1	bgnt-1.3	F21H7.10	LOW	c.315T>A	p.Thr105Thr	protein_coding_gene	Slope	15660911	17615557	0.0136712	0.201877
WBGene00009032	V_16254560	V	16254560	G	A	transcript	F21H7.10.1	bgnt-1.3	F21H7.10	LOW	c.1062C>T	p.Tyr354Tyr	protein_coding_gene	Slope	15660911	17615557	0.0136712	0.201877
WBGene00009032	V_16254566	V	16254566	T	A	transcript	F21H7.10.1	bgnt-1.3	F21H7.10	LOW	c.1056A>T	p.Ala352Ala	protein_coding_gene	Slope	15660911	17615557	0.0136712	0.201877
WBGene00009032	V_16254533	V	16254533	A	G	transcript	F21H7.10.1	bgnt-1.3	F21H7.10	LOW	c.1089T>C	p.Phe363Phe	protein_coding_gene	Slope	15660911	17615557	0.00309297	0.181874
WBGene00009032	V_16255717	V	16255717	G	A	transcript	F21H7.10.1	bgnt-1.3	F21H7.10	LOW	c.334C>T	p.Leu112Leu	protein_coding_gene	Slope	15660911	17615557	0.00309297	0.181874
WBGene00009032	V_16255718	V	16255718	A	G	transcript	F21H7.10.1	bgnt-1.3	F21H7.10	LOW	c.333T>C	p.Phe111Phe	protein_coding_gene	Slope	15660911	17615557	0.00309297	0.181874
WBGene00009032	V_16254589	V	16254589	G	GGAATT	transcript	F21H7.10.1	bgnt-1.3	F21H7.10	LOW	c.1036-4_1036-3insAATTC	NA	protein_coding_gene	PC1	15775895	18065050	NA	0.169464
WBGene00009032	V_16254380	V	16254380	G	A	transcript	F21H7.10.1	bgnt-1.3	F21H7.10	LOW	c.1191C>T	p.Ile397Ile	protein_coding_gene	PC1	15775895	18065050	0.00250627	0.169464
WBGene00009032	V_16254989	V	16254989	G	T	transcript	F21H7.10.1	bgnt-1.3	F21H7.10	LOW	c.846C>A	p.Arg282Arg	protein_coding_gene	PC1	15775895	18065050	0.00250627	0.169464
WBGene00009032	V_16255053	V	16255053	T	C	transcript	F21H7.10.1	bgnt-1.3	F21H7.10	LOW	c.824+4A>G	NA	protein_coding_gene	PC1	15775895	18065050	0.00250627	0.169464
WBGene00009032	V_16255007	V	16255007	A	G	transcript	F21H7.10.1	bgnt-1.3	F21H7.10	LOW	c.828T>C	p.Thr276Thr	protein_coding_gene	PC1	15775895	18065050	0.00250627	0.169464
WBGene00009032	V_16254671	V	16254671	A	G	transcript	F21H7.10.1	bgnt-1.3	F21H7.10	LOW	c.996T>C	p.Ala332Ala	protein_coding_gene	PC1	15775895	18065050	0.00885085	0.159542
WBGene00009032	V_16255926	V	16255926	G	A	transcript	F21H7.10.1	bgnt-1.3	F21H7.10	LOW	c.177C>T	p.Tyr59Tyr	protein_coding_gene	PC1	15775895	18065050	0.00885085	0.159542
WBGene00009032	V_16254998	V	16254998	A	G	transcript	F21H7.10.1	bgnt-1.3	F21H7.10	LOW	c.837T>C	p.Phe279Phe	protein_coding_gene	PC1	15775895	18065050	0.00885085	0.159542
WBGene00009032	V_16254473	V	16254473	G	A	transcript	F21H7.10.1	bgnt-1.3	F21H7.10	LOW	c.1149C>T	p.His383His	protein_coding_gene	PC1	15775895	18065050	0.00885085	0.159542
WBGene00009032	V_16255887	V	16255887	G	A	transcript	F21H7.10.1	bgnt-1.3	F21H7.10	LOW	c.216C>T	p.Ile72Ile	protein_coding_gene	PC1	15775895	18065050	0.00885085	0.159542
WBGene00009032	V_16255884	V	16255884	C	A	transcript	F21H7.10.1	bgnt-1.3	F21H7.10	LOW	c.219G>T	p.Ala73Ala	protein_coding_gene	PC1	15775895	18065050	0.00885085	0.159542
WBGene00009032	V_16254512	V	16254512	C	T	transcript	F21H7.10.1	bgnt-1.3	F21H7.10	LOW	c.1110G>A	p.Lys370Lys	protein_coding_gene	PC1	15775895	18065050	0.00885085	0.159542
WBGene00009032	V_16254677	V	16254677	G	A	transcript	F21H7.10.1	bgnt-1.3	F21H7.10	LOW	c.990C>T	p.Tyr330Tyr	protein_coding_gene	PC1	15775895	18065050	0.00885085	0.159542
WBGene00009032	V_16254551	V	16254551	A	G	transcript	F21H7.10.1	bgnt-1.3	F21H7.10	LOW	c.1071T>C	p.His357His	protein_coding_gene	PC1	15775895	18065050	0.00885085	0.159542
WBGene00009032	V_16254523	V	16254523	T	G	transcript	F21H7.10.1	bgnt-1.3	F21H7.10	LOW	c.1099A>C	p.Arg367Arg	protein_coding_gene	PC1	15775895	18065050	0.00885085	0.159542
WBGene00009032	V_16255018	V	16255018	G	A	transcript	F21H7.10.1	bgnt-1.3	F21H7.10	LOW	c.825-8C>T	NA	protein_coding_gene	PC1	15775895	18065050	0.00885085	0.159542
WBGene00009032	V_16254563	V	16254563	C	T	transcript	F21H7.10.1	bgnt-1.3	F21H7.10	LOW	c.1059G>A	p.Gly353Gly	protein_coding_gene	PC1	15775895	18065050	0.00885085	0.159542
WBGene00009032	V_16254923	V	16254923	C	T	transcript	F21H7.10.1	bgnt-1.3	F21H7.10	LOW	c.912G>A	p.Gly304Gly	protein_coding_gene	PC1	15775895	18065050	0.00540358	0.0936427
WBGene00009032	V_16255860	V	16255860	T	C	transcript	F21H7.10.1	bgnt-1.3	F21H7.10	LOW	c.243A>G	p.Glu81Glu	protein_coding_gene	PC1	15775895	18065050	0.00540358	0.0936427
WBGene00009032	V_16255013	V	16255013	G	A	transcript	F21H7.10.1	bgnt-1.3	F21H7.10	LOW	c.825-3C>T	NA	protein_coding_gene	PC1	15775895	18065050	0.00540358	0.0936427
WBGene00009032	V_16254533	V	16254533	A	G	transcript	F21H7.10.1	bgnt-1.3	F21H7.10	LOW	c.1089T>C	p.Phe363Phe	protein_coding_gene	PC1	15775895	18065050	0.0225564	0.0861145
WBGene00009032	V_16255718	V	16255718	A	G	transcript	F21H7.10.1	bgnt-1.3	F21H7.10	LOW	c.333T>C	p.Phe111Phe	protein_coding_gene	PC1	15775895	18065050	0.0225564	0.0861145
WBGene00009032	V_16255717	V	16255717	G	A	transcript	F21H7.10.1	bgnt-1.3	F21H7.10	LOW	c.334C>T	p.Leu112Leu	protein_coding_gene	PC1	15775895	18065050	0.0225564	0.0861145
WBGene00009032	V_16254497	V	16254497	T	A	transcript	F21H7.10.1	bgnt-1.3	F21H7.10	LOW	c.1125A>T	p.Ile375Ile	protein_coding_gene	PC1	15775895	18065050	0.0225564	0.039154
WBGene00009032	V_16255658	V	16255658	A	T	transcript	F21H7.10.1	bgnt-1.3	F21H7.10	LOW	c.393T>A	p.Leu131Leu	protein_coding_gene	PC1	15775895	18065050	0.0273556	0.0217458
WBGene00009032	V_16256307	V	16256307	C	T	transcript	F21H7.10.1	bgnt-1.3	F21H7.10	MODERATE	c.4G>A	p.Val2Ile	protein_coding_gene	PC1	15775895	18065050	0.347678	1.42077
WBGene00009032	V_16254355	V	16254355	G	C	transcript	F21H7.10.1	bgnt-1.3	F21H7.10	MODERATE	c.1216C>G	p.His406Asp	protein_coding_gene	Slope	15660911	17615557	0.0289531	0.527386
WBGene00009032	V_16254987	V	16254987	T	A	transcript	F21H7.10.1	bgnt-1.3	F21H7.10	MODERATE	c.848A>T	p.Tyr283Phe	protein_coding_gene	Slope	15660911	17615557	0.00309297	0.241085
WBGene00009032	V_16254987	V	16254987	T	A	transcript	F21H7.10.1	bgnt-1.3	F21H7.10	MODERATE	c.848A>T	p.Tyr283Phe	protein_coding_gene	PC1	15775895	18065050	0.00250627	0.169464
WBGene00009032	V_16254355	V	16254355	G	C	transcript	F21H7.10.1	bgnt-1.3	F21H7.10	MODERATE	c.1216C>G	p.His406Asp	protein_coding_gene	PC1	15775895	18065050	0.00885085	0.159542
WBGene00009032	V_16256307	V	16256307	C	T	transcript	F21H7.10.1	bgnt-1.3	F21H7.10	MODERATE	c.4G>A	p.Val2Ile	protein_coding_gene	Slope	15660911	17615557	0.432733	0.115851
WBGene00009032	V_16255846	V	16255846	T	C	transcript	F21H7.10.1	bgnt-1.3	F21H7.10	MODIFIER	c.245+12A>G	NA	protein_coding_gene	Slope	15660911	17615557	0.0289531	0.527386
WBGene00009032	V_16255035	V	16255035	G	A	transcript	F21H7.10.1	bgnt-1.3	F21H7.10	MODIFIER	c.824+22C>T	NA	protein_coding_gene	Slope	15660911	17615557	0.0289531	0.527386
WBGene00009032	V_16255839	V	16255839	T	C	transcript	F21H7.10.1	bgnt-1.3	F21H7.10	MODIFIER	c.245+19A>G	NA	protein_coding_gene	Slope	15660911	17615557	0.0289531	0.527386
WBGene00009032	V_16255824	V	16255824	G	A	transcript	F21H7.10.1	bgnt-1.3	F21H7.10	MODIFIER	c.246-19C>T	NA	protein_coding_gene	Slope	15660911	17615557	0.0289531	0.527386
WBGene00009032	V_16254757	V	16254757	AAC	A	transcript	F21H7.10.1	bgnt-1.3	F21H7.10	MODIFIER	c.942-34_942-33delGT	NA	protein_coding_gene	Slope	15660911	17615557	NA	0.241085
WBGene00009032	V_16255039	V	16255039	A	G	transcript	F21H7.10.1	bgnt-1.3	F21H7.10	MODIFIER	c.824+18T>C	NA	protein_coding_gene	Slope	15660911	17615557	0.00309297	0.241085
WBGene00009032	V_16255034	V	16255034	G	A	transcript	F21H7.10.1	bgnt-1.3	F21H7.10	MODIFIER	c.824+23C>T	NA	protein_coding_gene	Slope	15660911	17615557	0.00309297	0.241085
WBGene00009032	V_16254757	V	16254757	AAC	A	transcript	F21H7.10.1	bgnt-1.3	F21H7.10	MODIFIER	c.942-34_942-33delGT	NA	protein_coding_gene	PC1	15775895	18065050	NA	0.169464
WBGene00009032	V_16255034	V	16255034	G	A	transcript	F21H7.10.1	bgnt-1.3	F21H7.10	MODIFIER	c.824+23C>T	NA	protein_coding_gene	PC1	15775895	18065050	0.00250627	0.169464
WBGene00009032	V_16255039	V	16255039	A	G	transcript	F21H7.10.1	bgnt-1.3	F21H7.10	MODIFIER	c.824+18T>C	NA	protein_coding_gene	PC1	15775895	18065050	0.00250627	0.169464
WBGene00009032	V_16255035	V	16255035	G	A	transcript	F21H7.10.1	bgnt-1.3	F21H7.10	MODIFIER	c.824+22C>T	NA	protein_coding_gene	PC1	15775895	18065050	0.00885085	0.159542
WBGene00009032	V_16255846	V	16255846	T	C	transcript	F21H7.10.1	bgnt-1.3	F21H7.10	MODIFIER	c.245+12A>G	NA	protein_coding_gene	PC1	15775895	18065050	0.00885085	0.159542
WBGene00009032	V_16255839	V	16255839	T	C	transcript	F21H7.10.1	bgnt-1.3	F21H7.10	MODIFIER	c.245+19A>G	NA	protein_coding_gene	PC1	15775895	18065050	0.00885085	0.159542
WBGene00009032	V_16255824	V	16255824	G	A	transcript	F21H7.10.1	bgnt-1.3	F21H7.10	MODIFIER	c.246-19C>T	NA	protein_coding_gene	PC1	15775895	18065050	0.00885085	0.159542
WBGene00013606	V_16812772	V	16812772	G	A	transcript	Y102A5A.1.1	cand-1	Y102A5A.1	LOW	c.3438G>A	p.Ser1146Ser	protein_coding_gene	PC1	15775895	18065050	0.257499	3.2841
WBGene00013606	V_16811948	V	16811948	A	T	transcript	Y102A5A.1.1	cand-1	Y102A5A.1	LOW	c.3383+4A>T	NA	protein_coding_gene	PC1	15775895	18065050	0.160714	2.10942
WBGene00013606	V_16811948	V	16811948	A	T	transcript	Y102A5A.1.1	cand-1	Y102A5A.1	LOW	c.3383+4A>T	NA	protein_coding_gene	Slope	15660911	17615557	0.0828881	2.04429
WBGene00013606	V_16812772	V	16812772	G	A	transcript	Y102A5A.1.1	cand-1	Y102A5A.1	LOW	c.3438G>A	p.Ser1146Ser	protein_coding_gene	Slope	15660911	17615557	0.140481	1.21092
WBGene00013606	V_16811664	V	16811664	G	A	transcript	Y102A5A.1.1	cand-1	Y102A5A.1	MODERATE	c.3103G>A	p.Asp1035Asn	protein_coding_gene	Slope	15660911	17615557	0.0480816	1.74375
WBGene00013606	V_16805550	V	16805550	T	G	transcript	Y102A5A.1.1	cand-1	Y102A5A.1	MODERATE	c.981T>G	p.Asp327Glu	protein_coding_gene	Slope	15660911	17615557	0.0407965	1.69067
WBGene00013606	V_16810470	V	16810470	C	G	transcript	Y102A5A.1.1	cand-1	Y102A5A.1	MODERATE	c.2788C>G	p.Gln930Glu	protein_coding_gene	Slope	15660911	17615557	0.0407965	1.69067
WBGene00013606	V_16811664	V	16811664	G	A	transcript	Y102A5A.1.1	cand-1	Y102A5A.1	MODERATE	c.3103G>A	p.Asp1035Asn	protein_coding_gene	PC1	15775895	18065050	0.139009	1.63493
WBGene00013606	V_16810470	V	16810470	C	G	transcript	Y102A5A.1.1	cand-1	Y102A5A.1	MODERATE	c.2788C>G	p.Gln930Glu	protein_coding_gene	PC1	15775895	18065050	0.0171485	0.95815
WBGene00013606	V_16805550	V	16805550	T	G	transcript	Y102A5A.1.1	cand-1	Y102A5A.1	MODERATE	c.981T>G	p.Asp327Glu	protein_coding_gene	PC1	15775895	18065050	0.0171485	0.95815
WBGene00013606	V_16805330	V	16805330	G	A	transcript	Y102A5A.1.1	cand-1	Y102A5A.1	MODERATE	c.761G>A	p.Arg254Lys	protein_coding_gene	Slope	15660911	17615557	0.0751819	0.949323
WBGene00013606	V_16805330	V	16805330	G	A	transcript	Y102A5A.1.1	cand-1	Y102A5A.1	MODERATE	c.761G>A	p.Arg254Lys	protein_coding_gene	PC1	15775895	18065050	0.00116144	0.853982
WBGene00013606	V_16811719	V	16811719	C	T	transcript	Y102A5A.1.1	cand-1	Y102A5A.1	MODERATE	c.3158C>T	p.Ala1053Val	protein_coding_gene	PC1	15775895	18065050	0.192547	0.518424
WBGene00013606	V_16811719	V	16811719	C	T	transcript	Y102A5A.1.1	cand-1	Y102A5A.1	MODERATE	c.3158C>T	p.Ala1053Val	protein_coding_gene	Slope	15660911	17615557	0.183507	0.270364
WBGene00013606	V_16808318	V	16808318	T	C	transcript	Y102A5A.1.1	cand-1	Y102A5A.1	MODIFIER	c.2079+185T>C	NA	protein_coding_gene	Slope	15660911	17615557	0.0195888	2.08736
WBGene00013606	V_16808403	V	16808403	A	G	transcript	Y102A5A.1.1	cand-1	Y102A5A.1	MODIFIER	c.2080-147A>G	NA	protein_coding_gene	Slope	15660911	17615557	0.0302197	1.88904
WBGene00013606	V_16805714	V	16805714	G	A	transcript	Y102A5A.1.1	cand-1	Y102A5A.1	MODIFIER	c.1018+127G>A	NA	protein_coding_gene	Slope	15660911	17615557	0.0407965	1.69067
WBGene00013606	V_16805611	V	16805611	A	C	transcript	Y102A5A.1.1	cand-1	Y102A5A.1	MODIFIER	c.1018+24A>C	NA	protein_coding_gene	Slope	15660911	17615557	0.0570171	1.65379
WBGene00013606	V_16808370	V	16808370	G	T	transcript	Y102A5A.1.1	cand-1	Y102A5A.1	MODIFIER	c.2080-180G>T	NA	protein_coding_gene	Slope	15660911	17615557	0.0338731	1.63445
WBGene00013606	V_16808198	V	16808198	C	G	transcript	Y102A5A.1.1	cand-1	Y102A5A.1	MODIFIER	c.2079+65C>G	NA	protein_coding_gene	Slope	15660911	17615557	0.0338731	1.63445
WBGene00013606	V_16813601	V	16813601	C	T	transcript	Y102A5A.1.1	cand-1	Y102A5A.1	MODIFIER	c.3754-411C>T	NA	protein_coding_gene	PC1	15775895	18065050	0.0264063	1.60476
WBGene00013606	V_16808276	V	16808276	C	T	transcript	Y102A5A.1.1	cand-1	Y102A5A.1	MODIFIER	c.2079+143C>T	NA	protein_coding_gene	PC1	15775895	18065050	0.0264063	1.60476
WBGene00013606	V_16812666	V	16812666	AT	A	transcript	Y102A5A.1.1	cand-1	Y102A5A.1	MODIFIER	c.3384-51delT	NA	protein_coding_gene	PC1	15775895	18065050	NA	1.54771
WBGene00013606	V_16808370	V	16808370	G	T	transcript	Y102A5A.1.1	cand-1	Y102A5A.1	MODIFIER	c.2080-180G>T	NA	protein_coding_gene	PC1	15775895	18065050	0.0633176	1.51179
WBGene00013606	V_16808198	V	16808198	C	G	transcript	Y102A5A.1.1	cand-1	Y102A5A.1	MODIFIER	c.2079+65C>G	NA	protein_coding_gene	PC1	15775895	18065050	0.0633176	1.51179
WBGene00013606	V_16804695	V	16804695	G	A	transcript	Y102A5A.1.1	cand-1	Y102A5A.1	MODIFIER	c.504+292G>A	NA	protein_coding_gene	Slope	15660911	17615557	0.0070195	1.46905
WBGene00013606	V_16812666	V	16812666	AT	A	transcript	Y102A5A.1.1	cand-1	Y102A5A.1	MODIFIER	c.3384-51delT	NA	protein_coding_gene	Slope	15660911	17615557	NA	1.45751
WBGene00013606	V_16814090	V	16814090	C	A	transcript	Y102A5A.1.1	cand-1	Y102A5A.1	MODIFIER	c.*7C>A	NA	protein_coding_gene	Slope	15660911	17615557	0.124034	1.43758
WBGene00013606	V_16814400	V	16814400	G	C	transcript	Y102A5A.1.1	cand-1	Y102A5A.1	MODIFIER	c.*317G>C	NA	protein_coding_gene	Slope	15660911	17615557	0.0407965	1.38182
WBGene00013606	V_16808289	V	16808289	T	C	transcript	Y102A5A.1.1	cand-1	Y102A5A.1	MODIFIER	c.2079+156T>C	NA	protein_coding_gene	PC1	15775895	18065050	0.275126	1.20759
WBGene00013606	V_16814090	V	16814090	C	A	transcript	Y102A5A.1.1	cand-1	Y102A5A.1	MODIFIER	c.*7C>A	NA	protein_coding_gene	PC1	15775895	18065050	0.195804	1.16739
WBGene00013606	V_16804695	V	16804695	G	A	transcript	Y102A5A.1.1	cand-1	Y102A5A.1	MODIFIER	c.504+292G>A	NA	protein_coding_gene	PC1	15775895	18065050	0.0264063	1.14697
WBGene00013606	V_16808276	V	16808276	C	T	transcript	Y102A5A.1.1	cand-1	Y102A5A.1	MODIFIER	c.2079+143C>T	NA	protein_coding_gene	Slope	15660911	17615557	0.0289531	1.09884
WBGene00013606	V_16813601	V	16813601	C	T	transcript	Y102A5A.1.1	cand-1	Y102A5A.1	MODIFIER	c.3754-411C>T	NA	protein_coding_gene	Slope	15660911	17615557	0.0289531	1.09884
WBGene00013606	V_16813816	V	16813816	TCG	T	transcript	Y102A5A.1.1	cand-1	Y102A5A.1	MODIFIER	c.3754-195_3754-194delCG	NA	protein_coding_gene	PC1	15775895	18065050	NA	1.05872
WBGene00013606	V_16808318	V	16808318	T	C	transcript	Y102A5A.1.1	cand-1	Y102A5A.1	MODIFIER	c.2079+185T>C	NA	protein_coding_gene	PC1	15775895	18065050	0.015873	0.969114
WBGene00013606	V_16805714	V	16805714	G	A	transcript	Y102A5A.1.1	cand-1	Y102A5A.1	MODIFIER	c.1018+127G>A	NA	protein_coding_gene	PC1	15775895	18065050	0.0171485	0.95815
WBGene00013606	V_16809157	V	16809157	A	G	transcript	Y102A5A.1.1	cand-1	Y102A5A.1	MODIFIER	c.2234-45A>G	NA	protein_coding_gene	PC1	15775895	18065050	0.157796	0.924928
WBGene00013606	V_16814118	V	16814118	G	C	transcript	Y102A5A.1.1	cand-1	Y102A5A.1	MODIFIER	c.*35G>C	NA	protein_coding_gene	PC1	15775895	18065050	0.230769	0.892586
WBGene00013606	V_16814400	V	16814400	G	C	transcript	Y102A5A.1.1	cand-1	Y102A5A.1	MODIFIER	c.*317G>C	NA	protein_coding_gene	PC1	15775895	18065050	0.00510204	0.891522
WBGene00013606	V_16805611	V	16805611	A	C	transcript	Y102A5A.1.1	cand-1	Y102A5A.1	MODIFIER	c.1018+24A>C	NA	protein_coding_gene	PC1	15775895	18065050	0.0121832	0.812396
WBGene00013606	V_16808403	V	16808403	A	G	transcript	Y102A5A.1.1	cand-1	Y102A5A.1	MODIFIER	c.2080-147A>G	NA	protein_coding_gene	PC1	15775895	18065050	0.011979	0.795033
WBGene00013606	V_16806350	V	16806350	A	T	transcript	Y102A5A.1.1	cand-1	Y102A5A.1	MODIFIER	c.1019-55A>T	NA	protein_coding_gene	PC1	15775895	18065050	0.182882	0.793203
WBGene00013606	V_16811981	V	16811981	G	C	transcript	Y102A5A.1.1	cand-1	Y102A5A.1	MODIFIER	c.3383+37G>C	NA	protein_coding_gene	PC1	15775895	18065050	0.179611	0.746435
WBGene00013606	V_16814486	V	16814486	G	A	transcript	Y102A5A.1.1	cand-1	Y102A5A.1	MODIFIER	c.*403G>A	NA	protein_coding_gene	PC1	15775895	18065050	0.201681	0.742883
WBGene00013606	V_16814826	V	16814826	G	C	transcript	Y102A5A.1.1	cand-1	Y102A5A.1	MODIFIER	c.*743G>C	NA	protein_coding_gene	PC1	15775895	18065050	0.201681	0.742883
WBGene00013606	V_16813768	V	16813768	A	G	transcript	Y102A5A.1.1	cand-1	Y102A5A.1	MODIFIER	c.3754-244A>G	NA	protein_coding_gene	PC1	15775895	18065050	0.201681	0.742883
WBGene00013606	V_16814826	V	16814826	G	C	transcript	Y102A5A.1.1	cand-1	Y102A5A.1	MODIFIER	c.*743G>C	NA	protein_coding_gene	Slope	15660911	17615557	0.192212	0.385968
WBGene00013606	V_16814486	V	16814486	G	A	transcript	Y102A5A.1.1	cand-1	Y102A5A.1	MODIFIER	c.*403G>A	NA	protein_coding_gene	Slope	15660911	17615557	0.192212	0.385968
WBGene00013606	V_16813768	V	16813768	A	G	transcript	Y102A5A.1.1	cand-1	Y102A5A.1	MODIFIER	c.3754-244A>G	NA	protein_coding_gene	Slope	15660911	17615557	0.192212	0.385968
WBGene00013606	V_16814118	V	16814118	G	C	transcript	Y102A5A.1.1	cand-1	Y102A5A.1	MODIFIER	c.*35G>C	NA	protein_coding_gene	Slope	15660911	17615557	0.219935	0.356795
WBGene00013606	V_16812685	V	16812685	T	C	transcript	Y102A5A.1.1	cand-1	Y102A5A.1	MODIFIER	c.3384-33T>C	NA	protein_coding_gene	PC1	15775895	18065050	0.142687	0.346475
WBGene00013606	V_16811981	V	16811981	G	C	transcript	Y102A5A.1.1	cand-1	Y102A5A.1	MODIFIER	c.3383+37G>C	NA	protein_coding_gene	Slope	15660911	17615557	0.210414	0.29071
WBGene00013606	V_16814119	V	16814119	C	T	transcript	Y102A5A.1.1	cand-1	Y102A5A.1	MODIFIER	c.*36C>T	NA	protein_coding_gene	PC1	15775895	18065050	0.0322581	0.245833
WBGene00013606	V_16809157	V	16809157	A	G	transcript	Y102A5A.1.1	cand-1	Y102A5A.1	MODIFIER	c.2234-45A>G	NA	protein_coding_gene	Slope	15660911	17615557	0.168452	0.195753
WBGene00013606	V_16812685	V	16812685	T	C	transcript	Y102A5A.1.1	cand-1	Y102A5A.1	MODIFIER	c.3384-33T>C	NA	protein_coding_gene	Slope	15660911	17615557	0.169898	0.141884
WBGene00013606	V_16813816	V	16813816	TCG	T	transcript	Y102A5A.1.1	cand-1	Y102A5A.1	MODIFIER	c.3754-195_3754-194delCG	NA	protein_coding_gene	Slope	15660911	17615557	NA	0.131283
WBGene00013606	V_16813655	V	16813655	A	C	transcript	Y102A5A.1.1	cand-1	Y102A5A.1	MODIFIER	c.3754-357A>C	NA	protein_coding_gene	Slope	15660911	17615557	0.00309297	0.12025
WBGene00013606	V_16806350	V	16806350	A	T	transcript	Y102A5A.1.1	cand-1	Y102A5A.1	MODIFIER	c.1019-55A>T	NA	protein_coding_gene	Slope	15660911	17615557	0.142328	0.111513
WBGene00013606	V_16813655	V	16813655	A	C	transcript	Y102A5A.1.1	cand-1	Y102A5A.1	MODIFIER	c.3754-357A>C	NA	protein_coding_gene	PC1	15775895	18065050	0.0225564	0.0816723
WBGene00013606	V_16808289	V	16808289	T	C	transcript	Y102A5A.1.1	cand-1	Y102A5A.1	MODIFIER	c.2079+156T>C	NA	protein_coding_gene	Slope	15660911	17615557	0.260692	0.0780617
WBGene00013606	V_16814119	V	16814119	C	T	transcript	Y102A5A.1.1	cand-1	Y102A5A.1	MODIFIER	c.*36C>T	NA	protein_coding_gene	Slope	15660911	17615557	0.00791475	0.023994
WBGene00009537	IV_16278764	IV	16278764	C	T	transcript	F38C2.5.1	ccch-2	F38C2.5	MODERATE	c.502C>T	p.Arg168Trp	protein_coding_gene	Slope	15939340	16613710	0.0132827	0.953362
WBGene00009537	IV_16274922	IV	16274922	GA	G	transcript	F38C2.5.1	ccch-2	F38C2.5	MODIFIER	c.-13+779delA	NA	protein_coding_gene	Slope	15939340	16613710	NA	1.66806
WBGene00009537	IV_16274366	IV	16274366	A	G	transcript	F38C2.5.1	ccch-2	F38C2.5	MODIFIER	c.-13+222A>G	NA	protein_coding_gene	Slope	15939340	16613710	0.342891	1.66806
WBGene00009537	IV_16274980	IV	16274980	G	T	transcript	F38C2.5.1	ccch-2	F38C2.5	MODIFIER	c.-13+836G>T	NA	protein_coding_gene	Slope	15939340	16613710	0.342891	1.66806
WBGene00009537	IV_16274700	IV	16274700	T	A	transcript	F38C2.5.1	ccch-2	F38C2.5	MODIFIER	c.-13+556T>A	NA	protein_coding_gene	Slope	15939340	16613710	0.342891	1.66806
WBGene00009537	IV_16275554	IV	16275554	A	T	transcript	F38C2.5.1	ccch-2	F38C2.5	MODIFIER	c.-13+1410A>T	NA	protein_coding_gene	Slope	15939340	16613710	0.00480439	1.33578
WBGene00009537	IV_16272995	IV	16272995	C	A	transcript	F38C2.5.1	ccch-2	F38C2.5	MODIFIER	c.-1162C>A	NA	protein_coding_gene	Slope	15939340	16613710	0.0250896	0.543976
WBGene00009537	IV_16274831	IV	16274831	A	G	transcript	F38C2.5.1	ccch-2	F38C2.5	MODIFIER	c.-13+687A>G	NA	protein_coding_gene	Slope	15939340	16613710	0.0200082	0.515951
WBGene00009537	IV_16272628	IV	16272628	ATTGATTTTTTT	A	transcript	F38C2.5.1	ccch-2	F38C2.5	MODIFIER	c.-1526_-1516delGATTTTTTTTT	NA	protein_coding_gene	Slope	15939340	16613710	NA	0.504882
WBGene00009537	IV_16273434	IV	16273434	A	G	transcript	F38C2.5.1	ccch-2	F38C2.5	MODIFIER	c.-723A>G	NA	protein_coding_gene	Slope	15939340	16613710	0.0338164	0.426964
WBGene00009537	IV_16274545	IV	16274545	TAAACGGTTAACGGTTAACGGTTAACGG	T	transcript	F38C2.5.1	ccch-2	F38C2.5	MODIFIER	c.-13+402_-13+428delAAACGGTTAACGGTTAACGGTTAACGG	NA	protein_coding_gene	Slope	15939340	16613710	NA	0.426964
WBGene00009537	IV_16277738	IV	16277738	T	A	transcript	F38C2.5.1	ccch-2	F38C2.5	MODIFIER	c.-12-464T>A	NA	protein_coding_gene	Slope	15939340	16613710	0.0354206	0.387997
WBGene00009537	IV_16276722	IV	16276722	G	A	transcript	F38C2.5.1	ccch-2	F38C2.5	MODIFIER	c.-12-1480G>A	NA	protein_coding_gene	Slope	15939340	16613710	0.0122531	0.371468
WBGene00009537	IV_16276695	IV	16276695	T	C	transcript	F38C2.5.1	ccch-2	F38C2.5	MODIFIER	c.-12-1507T>C	NA	protein_coding_gene	Slope	15939340	16613710	0.0122531	0.371468
WBGene00009537	IV_16278013	IV	16278013	T	G	transcript	F38C2.5.1	ccch-2	F38C2.5	MODIFIER	c.-12-189T>G	NA	protein_coding_gene	Slope	15939340	16613710	0.0083632	0.160822
WBGene00009537	IV_16273195	IV	16273195	C	T	transcript	F38C2.5.1	ccch-2	F38C2.5	MODIFIER	c.-962C>T	NA	protein_coding_gene	Slope	15939340	16613710	0.0083632	0.160822
WBGene00009537	IV_16277824	IV	16277824	A	C	transcript	F38C2.5.1	ccch-2	F38C2.5	MODIFIER	c.-12-378A>C	NA	protein_coding_gene	Slope	15939340	16613710	0.0083632	0.160822
WBGene00009537	IV_16272774	IV	16272774	A	T	transcript	F38C2.5.1	ccch-2	F38C2.5	MODIFIER	c.-1383A>T	NA	protein_coding_gene	Slope	15939340	16613710	0.0122531	0.145074
WBGene00009537	IV_16274029	IV	16274029	A	C	transcript	F38C2.5.1	ccch-2	F38C2.5	MODIFIER	c.-128A>C	NA	protein_coding_gene	Slope	15939340	16613710	0.00396152	0.118238
WBGene00009537	IV_16274807	IV	16274807	G	A	transcript	F38C2.5.1	ccch-2	F38C2.5	MODIFIER	c.-13+663G>A	NA	protein_coding_gene	Slope	15939340	16613710	0.00396152	0.118238
WBGene00009537	IV_16273900	IV	16273900	C	T	transcript	F38C2.5.1	ccch-2	F38C2.5	MODIFIER	c.-257C>T	NA	protein_coding_gene	Slope	15939340	16613710	0.103943	0.105158
WBGene00009537	IV_16273597	IV	16273597	A	G	transcript	F38C2.5.1	ccch-2	F38C2.5	MODIFIER	c.-560A>G	NA	protein_coding_gene	Slope	15939340	16613710	0.00480439	0.0782248
WBGene00009537	IV_16273918	IV	16273918	C	A	transcript	F38C2.5.1	ccch-2	F38C2.5	MODIFIER	c.-239C>A	NA	protein_coding_gene	Slope	15939340	16613710	0.00480439	0.0782248
WBGene00009537	IV_16273313	IV	16273313	T	A	transcript	F38C2.5.1	ccch-2	F38C2.5	MODIFIER	c.-844T>A	NA	protein_coding_gene	Slope	15939340	16613710	0.00480439	0.0782248
WBGene00009537	IV_16274011	IV	16274011	A	C	transcript	F38C2.5.1	ccch-2	F38C2.5	MODIFIER	c.-146A>C	NA	protein_coding_gene	Slope	15939340	16613710	0.00744417	0.00800249
WBGene00020391	V_1872341	V	1872341	A	G	transcript	T10B5.5a.1	cct-7	T10B5.5	LOW	c.90A>G	p.Gln30Gln	protein_coding_gene	PC1	1345848	2764788	0.0397206	0.0382372
WBGene00020391	V_1874468	V	1874468	C	T	transcript	T10B5.5b.1	cct-7	T10B5.5	MODIFIER	c.*234C>T	NA	protein_coding_gene	PC1	1345848	2764788	0.617239	1.58374
WBGene00020391	V_1874694	V	1874694	A	T	transcript	T10B5.5a.1	cct-7	T10B5.5	MODIFIER	c.1324-196A>T	NA	protein_coding_gene	PC1	1345848	2764788	0.0200082	0.153298
WBGene00020391	V_1874596	V	1874596	C	T	transcript	T10B5.5a.1	cct-7	T10B5.5	MODIFIER	c.1324-294C>T	NA	protein_coding_gene	PC1	1345848	2764788	0.00204535	0.101419
WBGene00000387	V_1583467	V	1583467	G	A	transcript	F16B4.8a.1	cdc-25.2	F16B4.8	LOW	c.393G>A	p.Arg131Arg	protein_coding_gene	PC1	1345848	2764788	0.465711	1.83656
WBGene00000387	V_1583509	V	1583509	A	G	transcript	F16B4.8a.1	cdc-25.2	F16B4.8	LOW	c.435A>G	p.Leu145Leu	protein_coding_gene	PC1	1345848	2764788	0.255398	1.38162
WBGene00000387	V_1584694	V	1584694	C	T	transcript	F16B4.8a.1	cdc-25.2	F16B4.8	LOW	c.1203C>T	p.Phe401Phe	protein_coding_gene	PC1	1345848	2764788	0.0139907	1.11272
WBGene00000387	V_1583479	V	1583479	G	A	transcript	F16B4.8a.1	cdc-25.2	F16B4.8	LOW	c.405G>A	p.Lys135Lys	protein_coding_gene	PC1	1345848	2764788	0.0139907	1.11272
WBGene00000387	V_1584553	V	1584553	A	T	transcript	F16B4.8a.1	cdc-25.2	F16B4.8	MODERATE	c.1062A>T	p.Gln354His	protein_coding_gene	PC1	1345848	2764788	0.452617	1.15967
WBGene00000387	V_1577795	V	1577795	G	A	transcript	F16B4.8a.1	cdc-25.2	F16B4.8	MODERATE	c.58G>A	p.Glu20Lys	protein_coding_gene	PC1	1345848	2764788	0.0139907	1.11272
WBGene00000387	V_1582864	V	1582864	C	T	transcript	F16B4.8a.1	cdc-25.2	F16B4.8	MODERATE	c.152C>T	p.Ser51Leu	protein_coding_gene	PC1	1345848	2764788	0.0139907	1.11272
WBGene00000387	V_1583342	V	1583342	G	A	transcript	F16B4.8a.1	cdc-25.2	F16B4.8	MODERATE	c.268G>A	p.Glu90Lys	protein_coding_gene	PC1	1345848	2764788	0.0139907	0.11487
WBGene00000387	V_1581329	V	1581329	T	A	transcript	F16B4.8a.1	cdc-25.2	F16B4.8	MODIFIER	c.59-1442T>A	NA	protein_coding_gene	PC1	1345848	2764788	0.555059	2.45237
WBGene00000387	V_1578580	V	1578580	T	C	transcript	F16B4.8a.1	cdc-25.2	F16B4.8	MODIFIER	c.58+785T>C	NA	protein_coding_gene	PC1	1345848	2764788	0.245375	1.78619
WBGene00000387	V_1584496	V	1584496	G	A	transcript	F16B4.8a.1	cdc-25.2	F16B4.8	MODIFIER	c.1051-46G>A	NA	protein_coding_gene	PC1	1345848	2764788	0.245375	1.78619
WBGene00000387	V_1581172	V	1581172	T	TA	transcript	F16B4.8a.1	cdc-25.2	F16B4.8	MODIFIER	c.59-1599_59-1598insA	NA	protein_coding_gene	PC1	1345848	2764788	NA	1.70351
WBGene00000387	V_1569048	V	1569048	C	G	transcript	F16B4.8d	cdc-25.2	F16B4.8	MODIFIER	n.36+1937C>G	NA	protein_coding_gene	PC1	1345848	2764788	0.487921	1.53765
WBGene00000387	V_1574953	V	1574953	A	G	transcript	F16B4.8d	cdc-25.2	F16B4.8	MODIFIER	n.37-2738A>G	NA	protein_coding_gene	PC1	1345848	2764788	0.487921	1.53765
WBGene00000387	V_1582002	V	1582002	A	T	transcript	F16B4.8a.1	cdc-25.2	F16B4.8	MODIFIER	c.59-769A>T	NA	protein_coding_gene	PC1	1345848	2764788	0.487921	1.53765
WBGene00000387	V_1571060	V	1571060	A	G	transcript	F16B4.8d	cdc-25.2	F16B4.8	MODIFIER	n.36+3949A>G	NA	protein_coding_gene	PC1	1345848	2764788	0.487921	1.53765
WBGene00000387	V_1576620	V	1576620	T	C	transcript	F16B4.8d	cdc-25.2	F16B4.8	MODIFIER	n.37-1071T>C	NA	protein_coding_gene	PC1	1345848	2764788	0.487921	1.53765
WBGene00000387	V_1570993	V	1570993	C	T	transcript	F16B4.8d	cdc-25.2	F16B4.8	MODIFIER	n.36+3882C>T	NA	protein_coding_gene	PC1	1345848	2764788	0.487921	1.53765
WBGene00000387	V_1580473	V	1580473	T	C	transcript	F16B4.8a.1	cdc-25.2	F16B4.8	MODIFIER	c.59-2298T>C	NA	protein_coding_gene	PC1	1345848	2764788	0.487921	1.53765
WBGene00000387	V_1578549	V	1578549	C	A	transcript	F16B4.8a.1	cdc-25.2	F16B4.8	MODIFIER	c.58+754C>A	NA	protein_coding_gene	PC1	1345848	2764788	0.487921	1.53765
WBGene00000387	V_1582251	V	1582251	T	C	transcript	F16B4.8a.1	cdc-25.2	F16B4.8	MODIFIER	c.59-520T>C	NA	protein_coding_gene	PC1	1345848	2764788	0.265823	1.48725
WBGene00000387	V_1585046	V	1585046	A	C	transcript	F16B4.8a.1	cdc-25.2	F16B4.8	MODIFIER	c.*112A>C	NA	protein_coding_gene	PC1	1345848	2764788	0.265823	1.48725
WBGene00000387	V_1585044	V	1585044	A	C	transcript	F16B4.8a.1	cdc-25.2	F16B4.8	MODIFIER	c.*110A>C	NA	protein_coding_gene	PC1	1345848	2764788	0.265823	1.48725
WBGene00000387	V_1581957	V	1581957	T	TA	transcript	F16B4.8a.1	cdc-25.2	F16B4.8	MODIFIER	c.59-814_59-813insA	NA	protein_coding_gene	PC1	1345848	2764788	NA	1.48725
WBGene00000387	V_1585120	V	1585120	G	T	transcript	F16B4.8a.1	cdc-25.2	F16B4.8	MODIFIER	c.*186G>T	NA	protein_coding_gene	PC1	1345848	2764788	0.276673	1.42114
WBGene00000387	V_1570540	V	1570540	A	G	transcript	F16B4.8d	cdc-25.2	F16B4.8	MODIFIER	n.36+3429A>G	NA	protein_coding_gene	PC1	1345848	2764788	0.255398	1.38162
WBGene00000387	V_1571728	V	1571728	C	T	transcript	F16B4.8d	cdc-25.2	F16B4.8	MODIFIER	n.36+4617C>T	NA	protein_coding_gene	PC1	1345848	2764788	0.255398	1.38162
WBGene00000387	V_1572395	V	1572395	G	A	transcript	F16B4.8d	cdc-25.2	F16B4.8	MODIFIER	n.36+5284G>A	NA	protein_coding_gene	PC1	1345848	2764788	0.255398	1.38162
WBGene00000387	V_1578198	V	1578198	A	T	transcript	F16B4.8a.1	cdc-25.2	F16B4.8	MODIFIER	c.58+403A>T	NA	protein_coding_gene	PC1	1345848	2764788	0.255398	1.38162
WBGene00000387	V_1581721	V	1581721	A	C	transcript	F16B4.8a.1	cdc-25.2	F16B4.8	MODIFIER	c.59-1050A>C	NA	protein_coding_gene	PC1	1345848	2764788	0.255398	1.38162
WBGene00000387	V_1568388	V	1568388	G	A	transcript	F16B4.8d	cdc-25.2	F16B4.8	MODIFIER	n.36+1277G>A	NA	protein_coding_gene	PC1	1345848	2764788	0.255398	1.38162
WBGene00000387	V_1568709	V	1568709	G	A	transcript	F16B4.8d	cdc-25.2	F16B4.8	MODIFIER	n.36+1598G>A	NA	protein_coding_gene	PC1	1345848	2764788	0.255398	1.38162
WBGene00000387	V_1577616	V	1577616	C	G	transcript	F16B4.8d	cdc-25.2	F16B4.8	MODIFIER	n.37-75C>G	NA	protein_coding_gene	PC1	1345848	2764788	0.462958	1.37529
WBGene00000387	V_1568864	V	1568864	G	A	transcript	F16B4.8d	cdc-25.2	F16B4.8	MODIFIER	n.36+1753G>A	NA	protein_coding_gene	PC1	1345848	2764788	0.276673	1.37411
WBGene00000387	V_1577622	V	1577622	T	G	transcript	F16B4.8d	cdc-25.2	F16B4.8	MODIFIER	n.37-69T>G	NA	protein_coding_gene	PC1	1345848	2764788	0.0139907	1.11272
WBGene00000387	V_1574361	V	1574361	A	G	transcript	F16B4.8d	cdc-25.2	F16B4.8	MODIFIER	n.37-3330A>G	NA	protein_coding_gene	PC1	1345848	2764788	0.0139907	1.11272
WBGene00000387	V_1569534	V	1569534	C	T	transcript	F16B4.8d	cdc-25.2	F16B4.8	MODIFIER	n.36+2423C>T	NA	protein_coding_gene	PC1	1345848	2764788	0.0139907	1.11272
WBGene00000387	V_1570061	V	1570061	AT	A	transcript	F16B4.8d	cdc-25.2	F16B4.8	MODIFIER	n.36+2951delT	NA	protein_coding_gene	PC1	1345848	2764788	NA	1.11272
WBGene00000387	V_1567579	V	1567579	GGACGCCATAA	G	transcript	F16B4.8d	cdc-25.2	F16B4.8	MODIFIER	n.36+469_36+478delGACGCCATAA	NA	protein_coding_gene	PC1	1345848	2764788	NA	1.11272
WBGene00000387	V_1575527	V	1575527	G	A	transcript	F16B4.8d	cdc-25.2	F16B4.8	MODIFIER	n.37-2164G>A	NA	protein_coding_gene	PC1	1345848	2764788	0.0139907	1.11272
WBGene00000387	V_1571636	V	1571636	T	G	transcript	F16B4.8d	cdc-25.2	F16B4.8	MODIFIER	n.36+4525T>G	NA	protein_coding_gene	PC1	1345848	2764788	0.0139907	1.11272
WBGene00000387	V_1575772	V	1575772	G	GTC	transcript	F16B4.8d	cdc-25.2	F16B4.8	MODIFIER	n.37-1919_37-1918insTC	NA	protein_coding_gene	PC1	1345848	2764788	NA	1.11272
WBGene00000387	V_1575380	V	1575380	A	T	transcript	F16B4.8d	cdc-25.2	F16B4.8	MODIFIER	n.37-2311A>T	NA	protein_coding_gene	PC1	1345848	2764788	0.0139907	1.11272
WBGene00000387	V_1567606	V	1567606	T	A	transcript	F16B4.8d	cdc-25.2	F16B4.8	MODIFIER	n.36+495T>A	NA	protein_coding_gene	PC1	1345848	2764788	0.433711	1.04696
WBGene00000387	V_1582229	V	1582229	A	G	transcript	F16B4.8a.1	cdc-25.2	F16B4.8	MODIFIER	c.59-542A>G	NA	protein_coding_gene	PC1	1345848	2764788	3.17249e-05	0.511213
WBGene00000387	V_1578824	V	1578824	G	GA	transcript	F16B4.8a.1	cdc-25.2	F16B4.8	MODIFIER	c.58+1029_58+1030insA	NA	protein_coding_gene	PC1	1345848	2764788	NA	0.511213
WBGene00000387	V_1579080	V	1579080	G	A	transcript	F16B4.8a.1	cdc-25.2	F16B4.8	MODIFIER	c.58+1285G>A	NA	protein_coding_gene	PC1	1345848	2764788	3.17249e-05	0.511213
WBGene00000387	V_1579489	V	1579489	C	T	transcript	F16B4.8a.1	cdc-25.2	F16B4.8	MODIFIER	c.58+1694C>T	NA	protein_coding_gene	PC1	1345848	2764788	3.17249e-05	0.511213
WBGene00000387	V_1581797	V	1581797	T	G	transcript	F16B4.8a.1	cdc-25.2	F16B4.8	MODIFIER	c.59-974T>G	NA	protein_coding_gene	PC1	1345848	2764788	3.17249e-05	0.511213
WBGene00000387	V_1578185	V	1578185	T	A	transcript	F16B4.8a.1	cdc-25.2	F16B4.8	MODIFIER	c.58+390T>A	NA	protein_coding_gene	PC1	1345848	2764788	3.17249e-05	0.511213
WBGene00000387	V_1579181	V	1579181	C	G	transcript	F16B4.8a.1	cdc-25.2	F16B4.8	MODIFIER	c.58+1386C>G	NA	protein_coding_gene	PC1	1345848	2764788	3.17249e-05	0.511213
WBGene00000387	V_1572470	V	1572470	T	A	transcript	F16B4.8d	cdc-25.2	F16B4.8	MODIFIER	n.37-5221T>A	NA	protein_coding_gene	PC1	1345848	2764788	0.0295359	0.402828
WBGene00000387	V_1577475	V	1577475	A	G	transcript	F16B4.8d	cdc-25.2	F16B4.8	MODIFIER	n.37-216A>G	NA	protein_coding_gene	PC1	1345848	2764788	0.149525	0.342266
WBGene00000387	V_1575205	V	1575205	G	A	transcript	F16B4.8d	cdc-25.2	F16B4.8	MODIFIER	n.37-2486G>A	NA	protein_coding_gene	PC1	1345848	2764788	0.000722472	0.324243
WBGene00000387	V_1572007	V	1572007	C	A	transcript	F16B4.8d	cdc-25.2	F16B4.8	MODIFIER	n.36+4896C>A	NA	protein_coding_gene	PC1	1345848	2764788	8.90543e-05	0.286314
WBGene00000387	V_1570780	V	1570780	G	A	transcript	F16B4.8d	cdc-25.2	F16B4.8	MODIFIER	n.36+3669G>A	NA	protein_coding_gene	PC1	1345848	2764788	8.90543e-05	0.286314
WBGene00000387	V_1572273	V	1572273	T	C	transcript	F16B4.8d	cdc-25.2	F16B4.8	MODIFIER	n.36+5162T>C	NA	protein_coding_gene	PC1	1345848	2764788	8.90543e-05	0.286314
WBGene00000387	V_1578481	V	1578481	T	TA	transcript	F16B4.8a.1	cdc-25.2	F16B4.8	MODIFIER	c.58+686_58+687insA	NA	protein_coding_gene	PC1	1345848	2764788	NA	0.2096
WBGene00000387	V_1577099	V	1577099	G	A	transcript	F16B4.8d	cdc-25.2	F16B4.8	MODIFIER	n.37-592G>A	NA	protein_coding_gene	PC1	1345848	2764788	0.0211029	0.0681542
WBGene00000387	V_1579507	V	1579507	A	G	transcript	F16B4.8a.1	cdc-25.2	F16B4.8	MODIFIER	c.58+1712A>G	NA	protein_coding_gene	PC1	1345848	2764788	0.0211029	0.0681542
WBGene00000387	V_1580419	V	1580419	A	T	transcript	F16B4.8a.1	cdc-25.2	F16B4.8	MODIFIER	c.59-2352A>T	NA	protein_coding_gene	PC1	1345848	2764788	0.0211029	0.0681542
WBGene00000387	V_1577223	V	1577223	G	A	transcript	F16B4.8d	cdc-25.2	F16B4.8	MODIFIER	n.37-468G>A	NA	protein_coding_gene	PC1	1345848	2764788	0.0211029	0.0681542
WBGene00000387	V_1581679	V	1581679	A	G	transcript	F16B4.8a.1	cdc-25.2	F16B4.8	MODIFIER	c.59-1092A>G	NA	protein_coding_gene	PC1	1345848	2764788	0.0211029	0.0681542
WBGene00000387	V_1576612	V	1576612	A	G	transcript	F16B4.8d	cdc-25.2	F16B4.8	MODIFIER	n.37-1079A>G	NA	protein_coding_gene	PC1	1345848	2764788	0.0211029	0.0681542
WBGene00000387	V_1581677	V	1581677	CA	C	transcript	F16B4.8a.1	cdc-25.2	F16B4.8	MODIFIER	c.59-1093delA	NA	protein_coding_gene	PC1	1345848	2764788	NA	0.0681542
WBGene00000387	V_1572022	V	1572022	C	T	transcript	F16B4.8d	cdc-25.2	F16B4.8	MODIFIER	n.36+4911C>T	NA	protein_coding_gene	PC1	1345848	2764788	0.00204535	0.0175606
WBGene00000387	V_1572669	V	1572669	T	C	transcript	F16B4.8d	cdc-25.2	F16B4.8	MODIFIER	n.37-5022T>C	NA	protein_coding_gene	PC1	1345848	2764788	0.0241123	0.014335
WBGene00000387	V_1571571	V	1571571	A	G	transcript	F16B4.8d	cdc-25.2	F16B4.8	MODIFIER	n.36+4460A>G	NA	protein_coding_gene	PC1	1345848	2764788	0.0241123	0.014335
WBGene00000387	V_1572953	V	1572953	C	A	transcript	F16B4.8d	cdc-25.2	F16B4.8	MODIFIER	n.37-4738C>A	NA	protein_coding_gene	PC1	1345848	2764788	0.0241123	0.014335
WBGene00000387	V_1570517	V	1570517	A	T	transcript	F16B4.8d	cdc-25.2	F16B4.8	MODIFIER	n.36+3406A>T	NA	protein_coding_gene	PC1	1345848	2764788	0.0241123	0.014335
WBGene00000387	V_1573320	V	1573320	G	A	transcript	F16B4.8d	cdc-25.2	F16B4.8	MODIFIER	n.37-4371G>A	NA	protein_coding_gene	PC1	1345848	2764788	0.0241123	0.014335
WBGene00000387	V_1572241	V	1572241	A	C	transcript	F16B4.8d	cdc-25.2	F16B4.8	MODIFIER	n.36+5130A>C	NA	protein_coding_gene	PC1	1345848	2764788	0.0241123	0.014335
WBGene00000387	V_1570516	V	1570516	A	G	transcript	F16B4.8d	cdc-25.2	F16B4.8	MODIFIER	n.36+3405A>G	NA	protein_coding_gene	PC1	1345848	2764788	0.0241123	0.014335
WBGene00000387	V_1572757	V	1572757	A	T	transcript	F16B4.8d	cdc-25.2	F16B4.8	MODIFIER	n.37-4934A>T	NA	protein_coding_gene	PC1	1345848	2764788	0.0200082	0.00433918
WBGene00000412	V_15922327	V	15922327	T	C	transcript	F35E8.11.1	cdr-1	F35E8.11	LOW	c.441T>C	p.Phe147Phe	protein_coding_gene	Slope	15660911	17615557	0.276472	1.79405
WBGene00000412	V_15922561	V	15922561	A	G	transcript	F35E8.11.1	cdr-1	F35E8.11	LOW	c.675A>G	p.Glu225Glu	protein_coding_gene	Slope	15660911	17615557	0.276472	1.79405
WBGene00000412	V_15922513	V	15922513	A	C	transcript	F35E8.11.1	cdr-1	F35E8.11	LOW	c.627A>C	p.Arg209Arg	protein_coding_gene	Slope	15660911	17615557	0.276472	1.79405
WBGene00000412	V_15922321	V	15922321	A	C	transcript	F35E8.11.1	cdr-1	F35E8.11	LOW	c.435A>C	p.Ile145Ile	protein_coding_gene	Slope	15660911	17615557	0.276472	1.79405
WBGene00000412	V_15922150	V	15922150	A	T	transcript	F35E8.11.1	cdr-1	F35E8.11	LOW	c.357+8A>T	NA	protein_coding_gene	Slope	15660911	17615557	0.276472	1.79405
WBGene00000412	V_15922567	V	15922567	G	A	transcript	F35E8.11.1	cdr-1	F35E8.11	LOW	c.681G>A	p.Thr227Thr	protein_coding_gene	Slope	15660911	17615557	0.276472	1.79405
WBGene00000412	V_15922142	V	15922142	G	T	transcript	F35E8.11.1	cdr-1	F35E8.11	LOW	c.357G>T	p.Pro119Pro	protein_coding_gene	Slope	15660911	17615557	0.276472	1.79405
WBGene00000412	V_15922309	V	15922309	C	T	transcript	F35E8.11.1	cdr-1	F35E8.11	LOW	c.426-3C>T	NA	protein_coding_gene	Slope	15660911	17615557	0.276472	1.79405
WBGene00000412	V_15922336	V	15922336	T	C	transcript	F35E8.11.1	cdr-1	F35E8.11	LOW	c.450T>C	p.Ala150Ala	protein_coding_gene	Slope	15660911	17615557	0.276472	1.79405
WBGene00000412	V_15922306	V	15922306	T	C	transcript	F35E8.11.1	cdr-1	F35E8.11	LOW	c.426-6T>C	NA	protein_coding_gene	Slope	15660911	17615557	0.276472	1.79405
WBGene00000412	V_15922149	V	15922149	G	A	transcript	F35E8.11.1	cdr-1	F35E8.11	LOW	c.357+7G>A	NA	protein_coding_gene	Slope	15660911	17615557	0.276472	1.79405
WBGene00000412	V_15922304	V	15922304	T	G	transcript	F35E8.11.1	cdr-1	F35E8.11	LOW	c.426-8T>G	NA	protein_coding_gene	Slope	15660911	17615557	0.311012	1.72697
WBGene00000412	V_15922318	V	15922318	T	C	transcript	F35E8.11.1	cdr-1	F35E8.11	LOW	c.432T>C	p.Leu144Leu	protein_coding_gene	Slope	15660911	17615557	0.311012	1.72697
WBGene00000412	V_15922629	V	15922629	T	C	transcript	F35E8.11.1	cdr-1	F35E8.11	LOW	c.690T>C	p.Asp230Asp	protein_coding_gene	Slope	15660911	17615557	0.311012	1.72697
WBGene00000412	V_15922641	V	15922641	C	T	transcript	F35E8.11.1	cdr-1	F35E8.11	LOW	c.702C>T	p.Phe234Phe	protein_coding_gene	Slope	15660911	17615557	0.311012	1.72697
WBGene00000412	V_15921393	V	15921393	G	A	transcript	F35E8.11.1	cdr-1	F35E8.11	LOW	c.18G>A	p.Leu6Leu	protein_coding_gene	Slope	15660911	17615557	0.311012	1.72697
WBGene00000412	V_15922146	V	15922146	A	G	transcript	F35E8.11.1	cdr-1	F35E8.11	LOW	c.357+4A>G	NA	protein_coding_gene	Slope	15660911	17615557	0.311012	1.72697
WBGene00000412	V_15922221	V	15922221	T	A	transcript	F35E8.11.1	cdr-1	F35E8.11	LOW	c.387T>A	p.Ser129Ser	protein_coding_gene	Slope	15660911	17615557	0.311012	1.72697
WBGene00000412	V_15922230	V	15922230	A	G	transcript	F35E8.11.1	cdr-1	F35E8.11	LOW	c.396A>G	p.Leu132Leu	protein_coding_gene	Slope	15660911	17615557	0.311012	1.72697
WBGene00000412	V_15922752	V	15922752	C	T	transcript	F35E8.11.1	cdr-1	F35E8.11	LOW	c.813C>T	p.Tyr271Tyr	protein_coding_gene	Slope	15660911	17615557	0.311012	1.72697
WBGene00000412	V_15922692	V	15922692	T	A	transcript	F35E8.11.1	cdr-1	F35E8.11	LOW	c.753T>A	p.Val251Val	protein_coding_gene	Slope	15660911	17615557	0.311012	1.72697
WBGene00000412	V_15921387	V	15921387	A	T	transcript	F35E8.11.1	cdr-1	F35E8.11	LOW	c.12A>T	p.Ser4Ser	protein_coding_gene	Slope	15660911	17615557	0.311012	1.72697
WBGene00000412	V_15922304	V	15922304	T	G	transcript	F35E8.11.1	cdr-1	F35E8.11	LOW	c.426-8T>G	NA	protein_coding_gene	PC1	15775895	18065050	0.235534	0.897552
WBGene00000412	V_15921393	V	15921393	G	A	transcript	F35E8.11.1	cdr-1	F35E8.11	LOW	c.18G>A	p.Leu6Leu	protein_coding_gene	PC1	15775895	18065050	0.235534	0.897552
WBGene00000412	V_15922146	V	15922146	A	G	transcript	F35E8.11.1	cdr-1	F35E8.11	LOW	c.357+4A>G	NA	protein_coding_gene	PC1	15775895	18065050	0.235534	0.897552
WBGene00000412	V_15922318	V	15922318	T	C	transcript	F35E8.11.1	cdr-1	F35E8.11	LOW	c.432T>C	p.Leu144Leu	protein_coding_gene	PC1	15775895	18065050	0.235534	0.897552
WBGene00000412	V_15922641	V	15922641	C	T	transcript	F35E8.11.1	cdr-1	F35E8.11	LOW	c.702C>T	p.Phe234Phe	protein_coding_gene	PC1	15775895	18065050	0.235534	0.897552
WBGene00000412	V_15922221	V	15922221	T	A	transcript	F35E8.11.1	cdr-1	F35E8.11	LOW	c.387T>A	p.Ser129Ser	protein_coding_gene	PC1	15775895	18065050	0.235534	0.897552
WBGene00000412	V_15922629	V	15922629	T	C	transcript	F35E8.11.1	cdr-1	F35E8.11	LOW	c.690T>C	p.Asp230Asp	protein_coding_gene	PC1	15775895	18065050	0.235534	0.897552
WBGene00000412	V_15922692	V	15922692	T	A	transcript	F35E8.11.1	cdr-1	F35E8.11	LOW	c.753T>A	p.Val251Val	protein_coding_gene	PC1	15775895	18065050	0.235534	0.897552
WBGene00000412	V_15921387	V	15921387	A	T	transcript	F35E8.11.1	cdr-1	F35E8.11	LOW	c.12A>T	p.Ser4Ser	protein_coding_gene	PC1	15775895	18065050	0.235534	0.897552
WBGene00000412	V_15922752	V	15922752	C	T	transcript	F35E8.11.1	cdr-1	F35E8.11	LOW	c.813C>T	p.Tyr271Tyr	protein_coding_gene	PC1	15775895	18065050	0.235534	0.897552
WBGene00000412	V_15922230	V	15922230	A	G	transcript	F35E8.11.1	cdr-1	F35E8.11	LOW	c.396A>G	p.Leu132Leu	protein_coding_gene	PC1	15775895	18065050	0.235534	0.897552
WBGene00000412	V_15922561	V	15922561	A	G	transcript	F35E8.11.1	cdr-1	F35E8.11	LOW	c.675A>G	p.Glu225Glu	protein_coding_gene	PC1	15775895	18065050	0.24794	0.810097
WBGene00000412	V_15922321	V	15922321	A	C	transcript	F35E8.11.1	cdr-1	F35E8.11	LOW	c.435A>C	p.Ile145Ile	protein_coding_gene	PC1	15775895	18065050	0.24794	0.810097
WBGene00000412	V_15922513	V	15922513	A	C	transcript	F35E8.11.1	cdr-1	F35E8.11	LOW	c.627A>C	p.Arg209Arg	protein_coding_gene	PC1	15775895	18065050	0.24794	0.810097
WBGene00000412	V_15922142	V	15922142	G	T	transcript	F35E8.11.1	cdr-1	F35E8.11	LOW	c.357G>T	p.Pro119Pro	protein_coding_gene	PC1	15775895	18065050	0.24794	0.810097
WBGene00000412	V_15922567	V	15922567	G	A	transcript	F35E8.11.1	cdr-1	F35E8.11	LOW	c.681G>A	p.Thr227Thr	protein_coding_gene	PC1	15775895	18065050	0.24794	0.810097
WBGene00000412	V_15922150	V	15922150	A	T	transcript	F35E8.11.1	cdr-1	F35E8.11	LOW	c.357+8A>T	NA	protein_coding_gene	PC1	15775895	18065050	0.24794	0.810097
WBGene00000412	V_15922309	V	15922309	C	T	transcript	F35E8.11.1	cdr-1	F35E8.11	LOW	c.426-3C>T	NA	protein_coding_gene	PC1	15775895	18065050	0.24794	0.810097
WBGene00000412	V_15922327	V	15922327	T	C	transcript	F35E8.11.1	cdr-1	F35E8.11	LOW	c.441T>C	p.Phe147Phe	protein_coding_gene	PC1	15775895	18065050	0.24794	0.810097
WBGene00000412	V_15922306	V	15922306	T	C	transcript	F35E8.11.1	cdr-1	F35E8.11	LOW	c.426-6T>C	NA	protein_coding_gene	PC1	15775895	18065050	0.24794	0.810097
WBGene00000412	V_15922149	V	15922149	G	A	transcript	F35E8.11.1	cdr-1	F35E8.11	LOW	c.357+7G>A	NA	protein_coding_gene	PC1	15775895	18065050	0.24794	0.810097
WBGene00000412	V_15922336	V	15922336	T	C	transcript	F35E8.11.1	cdr-1	F35E8.11	LOW	c.450T>C	p.Ala150Ala	protein_coding_gene	PC1	15775895	18065050	0.24794	0.810097
WBGene00000412	V_15922552	V	15922552	C	T	transcript	F35E8.11.1	cdr-1	F35E8.11	LOW	c.666C>T	p.Phe222Phe	protein_coding_gene	PC1	15775895	18065050	0.0126358	0.534135
WBGene00000412	V_15922552	V	15922552	C	T	transcript	F35E8.11.1	cdr-1	F35E8.11	LOW	c.666C>T	p.Phe222Phe	protein_coding_gene	Slope	15660911	17615557	0.0655062	0.409321
WBGene00000412	V_15921615	V	15921615	G	T	transcript	F35E8.11.1	cdr-1	F35E8.11	MODERATE	c.177G>T	p.Leu59Phe	protein_coding_gene	Slope	15660911	17615557	0.686433	4.1883
WBGene00000412	V_15921599	V	15921599	A	G	transcript	F35E8.11.1	cdr-1	F35E8.11	MODERATE	c.161A>G	p.Lys54Arg	protein_coding_gene	Slope	15660911	17615557	0.686433	4.1883
WBGene00000412	V_15922484	V	15922484	C	T	transcript	F35E8.11.1	cdr-1	F35E8.11	MODERATE	c.598C>T	p.Leu200Phe	protein_coding_gene	Slope	15660911	17615557	0.603334	3.66391
WBGene00000412	V_15922484	V	15922484	C	T	transcript	F35E8.11.1	cdr-1	F35E8.11	MODERATE	c.598C>T	p.Leu200Phe	protein_coding_gene	PC1	15775895	18065050	0.499059	3.09344
WBGene00000412	V_15921599	V	15921599	A	G	transcript	F35E8.11.1	cdr-1	F35E8.11	MODERATE	c.161A>G	p.Lys54Arg	protein_coding_gene	PC1	15775895	18065050	0.436886	2.73753
WBGene00000412	V_15921615	V	15921615	G	T	transcript	F35E8.11.1	cdr-1	F35E8.11	MODERATE	c.177G>T	p.Leu59Phe	protein_coding_gene	PC1	15775895	18065050	0.436886	2.73753
WBGene00000412	V_15922198	V	15922198	C	T	transcript	F35E8.11.1	cdr-1	F35E8.11	MODERATE	c.364C>T	p.Pro122Ser	protein_coding_gene	Slope	15660911	17615557	0.276472	1.79405
WBGene00000412	V_15922452	V	15922452	A	T	transcript	F35E8.11.1	cdr-1	F35E8.11	MODERATE	c.566A>T	p.Gln189Leu	protein_coding_gene	Slope	15660911	17615557	0.276472	1.79405
WBGene00000412	V_15921664	V	15921664	C	T	transcript	F35E8.11.1	cdr-1	F35E8.11	MODERATE	c.226C>T	p.Pro76Ser	protein_coding_gene	Slope	15660911	17615557	0.276472	1.79405
WBGene00000412	V_15922684	V	15922684	T	A	transcript	F35E8.11.1	cdr-1	F35E8.11	MODERATE	c.745T>A	p.Ser249Thr	protein_coding_gene	Slope	15660911	17615557	0.276472	1.79405
WBGene00000412	V_15922673	V	15922673	G	A	transcript	F35E8.11.1	cdr-1	F35E8.11	MODERATE	c.734G>A	p.Arg245His	protein_coding_gene	Slope	15660911	17615557	0.276472	1.79405
WBGene00000412	V_15922451	V	15922451	C	G	transcript	F35E8.11.1	cdr-1	F35E8.11	MODERATE	c.565C>G	p.Gln189Glu	protein_coding_gene	Slope	15660911	17615557	0.276472	1.79405
WBGene00000412	V_15922547	V	15922547	C	A	transcript	F35E8.11.1	cdr-1	F35E8.11	MODERATE	c.661C>A	p.Leu221Ile	protein_coding_gene	Slope	15660911	17615557	0.276472	1.79405
WBGene00000412	V_15922559	V	15922559	G	A	transcript	F35E8.11.1	cdr-1	F35E8.11	MODERATE	c.673G>A	p.Glu225Lys	protein_coding_gene	Slope	15660911	17615557	0.311012	1.72697
WBGene00000412	V_15921392	V	15921392	T	C	transcript	F35E8.11.1	cdr-1	F35E8.11	MODERATE	c.17T>C	p.Leu6Ser	protein_coding_gene	Slope	15660911	17615557	0.311012	1.72697
WBGene00000412	V_15922213	V	15922213	A	G	transcript	F35E8.11.1	cdr-1	F35E8.11	MODERATE	c.379A>G	p.Thr127Ala	protein_coding_gene	Slope	15660911	17615557	0.311012	1.72697
WBGene00000412	V_15921451	V	15921451	G	C	transcript	F35E8.11.1	cdr-1	F35E8.11	MODERATE	c.76G>C	p.Val26Leu	protein_coding_gene	Slope	15660911	17615557	0.311012	1.72697
WBGene00000412	V_15921412	V	15921412	T	A	transcript	F35E8.11.1	cdr-1	F35E8.11	MODERATE	c.37T>A	p.Phe13Ile	protein_coding_gene	Slope	15660911	17615557	0.311012	1.72697
WBGene00000412	V_15922676	V	15922676	A	G	transcript	F35E8.11.1	cdr-1	F35E8.11	MODERATE	c.737A>G	p.Asn246Ser	protein_coding_gene	Slope	15660911	17615557	0.311012	1.72697
WBGene00000412	V_15921407	V	15921407	C	T	transcript	F35E8.11.1	cdr-1	F35E8.11	MODERATE	c.32C>T	p.Ala11Val	protein_coding_gene	Slope	15660911	17615557	0.311012	1.72697
WBGene00000412	V_15922559	V	15922559	G	A	transcript	F35E8.11.1	cdr-1	F35E8.11	MODERATE	c.673G>A	p.Glu225Lys	protein_coding_gene	PC1	15775895	18065050	0.235534	0.897552
WBGene00000412	V_15921412	V	15921412	T	A	transcript	F35E8.11.1	cdr-1	F35E8.11	MODERATE	c.37T>A	p.Phe13Ile	protein_coding_gene	PC1	15775895	18065050	0.235534	0.897552
WBGene00000412	V_15921451	V	15921451	G	C	transcript	F35E8.11.1	cdr-1	F35E8.11	MODERATE	c.76G>C	p.Val26Leu	protein_coding_gene	PC1	15775895	18065050	0.235534	0.897552
WBGene00000412	V_15922213	V	15922213	A	G	transcript	F35E8.11.1	cdr-1	F35E8.11	MODERATE	c.379A>G	p.Thr127Ala	protein_coding_gene	PC1	15775895	18065050	0.235534	0.897552
WBGene00000412	V_15921392	V	15921392	T	C	transcript	F35E8.11.1	cdr-1	F35E8.11	MODERATE	c.17T>C	p.Leu6Ser	protein_coding_gene	PC1	15775895	18065050	0.235534	0.897552
WBGene00000412	V_15922676	V	15922676	A	G	transcript	F35E8.11.1	cdr-1	F35E8.11	MODERATE	c.737A>G	p.Asn246Ser	protein_coding_gene	PC1	15775895	18065050	0.235534	0.897552
WBGene00000412	V_15921407	V	15921407	C	T	transcript	F35E8.11.1	cdr-1	F35E8.11	MODERATE	c.32C>T	p.Ala11Val	protein_coding_gene	PC1	15775895	18065050	0.235534	0.897552
WBGene00000412	V_15922452	V	15922452	A	T	transcript	F35E8.11.1	cdr-1	F35E8.11	MODERATE	c.566A>T	p.Gln189Leu	protein_coding_gene	PC1	15775895	18065050	0.24794	0.810097
WBGene00000412	V_15922673	V	15922673	G	A	transcript	F35E8.11.1	cdr-1	F35E8.11	MODERATE	c.734G>A	p.Arg245His	protein_coding_gene	PC1	15775895	18065050	0.24794	0.810097
WBGene00000412	V_15922198	V	15922198	C	T	transcript	F35E8.11.1	cdr-1	F35E8.11	MODERATE	c.364C>T	p.Pro122Ser	protein_coding_gene	PC1	15775895	18065050	0.24794	0.810097
WBGene00000412	V_15922547	V	15922547	C	A	transcript	F35E8.11.1	cdr-1	F35E8.11	MODERATE	c.661C>A	p.Leu221Ile	protein_coding_gene	PC1	15775895	18065050	0.24794	0.810097
WBGene00000412	V_15922684	V	15922684	T	A	transcript	F35E8.11.1	cdr-1	F35E8.11	MODERATE	c.745T>A	p.Ser249Thr	protein_coding_gene	PC1	15775895	18065050	0.24794	0.810097
WBGene00000412	V_15922451	V	15922451	C	G	transcript	F35E8.11.1	cdr-1	F35E8.11	MODERATE	c.565C>G	p.Gln189Glu	protein_coding_gene	PC1	15775895	18065050	0.24794	0.810097
WBGene00000412	V_15921664	V	15921664	C	T	transcript	F35E8.11.1	cdr-1	F35E8.11	MODERATE	c.226C>T	p.Pro76Ser	protein_coding_gene	PC1	15775895	18065050	0.24794	0.810097
WBGene00000412	V_15921339	V	15921339	G	A	transcript	F35E8.11.1	cdr-1	F35E8.11	MODIFIER	c.-37G>A	NA	protein_coding_gene	Slope	15660911	17615557	0.603334	3.66391
WBGene00000412	V_15921339	V	15921339	G	A	transcript	F35E8.11.1	cdr-1	F35E8.11	MODIFIER	c.-37G>A	NA	protein_coding_gene	PC1	15775895	18065050	0.499059	3.09344
WBGene00000412	V_15922791	V	15922791	G	A	transcript	F35E8.11.1	cdr-1	F35E8.11	MODIFIER	c.*18G>A	NA	protein_coding_gene	Slope	15660911	17615557	0.276472	1.79405
WBGene00000412	V_15922788	V	15922788	C	T	transcript	F35E8.11.1	cdr-1	F35E8.11	MODIFIER	c.*15C>T	NA	protein_coding_gene	Slope	15660911	17615557	0.276472	1.79405
WBGene00000412	V_15921322	V	15921322	G	T	transcript	F35E8.11.1	cdr-1	F35E8.11	MODIFIER	c.-54G>T	NA	protein_coding_gene	Slope	15660911	17615557	0.276472	1.79405
WBGene00000412	V_15922583	V	15922583	T	G	transcript	F35E8.11.1	cdr-1	F35E8.11	MODIFIER	c.684+13T>G	NA	protein_coding_gene	Slope	15660911	17615557	0.276472	1.79405
WBGene00000412	V_15922268	V	15922268	A	G	transcript	F35E8.11.1	cdr-1	F35E8.11	MODIFIER	c.425+9A>G	NA	protein_coding_gene	Slope	15660911	17615557	0.276472	1.79405
WBGene00000412	V_15922160	V	15922160	C	T	transcript	F35E8.11.1	cdr-1	F35E8.11	MODIFIER	c.357+18C>T	NA	protein_coding_gene	Slope	15660911	17615557	0.276472	1.79405
WBGene00000412	V_15922302	V	15922302	T	A	transcript	F35E8.11.1	cdr-1	F35E8.11	MODIFIER	c.426-10T>A	NA	protein_coding_gene	Slope	15660911	17615557	0.311012	1.72697
WBGene00000412	V_15921341	V	15921341	A	T	transcript	F35E8.11.1	cdr-1	F35E8.11	MODIFIER	c.-35A>T	NA	protein_coding_gene	Slope	15660911	17615557	0.311012	1.72697
WBGene00000412	V_15922271	V	15922271	T	A	transcript	F35E8.11.1	cdr-1	F35E8.11	MODIFIER	c.425+12T>A	NA	protein_coding_gene	Slope	15660911	17615557	0.311012	1.72697
WBGene00000412	V_15922270	V	15922270	T	C	transcript	F35E8.11.1	cdr-1	F35E8.11	MODIFIER	c.425+11T>C	NA	protein_coding_gene	Slope	15660911	17615557	0.311012	1.72697
WBGene00000412	V_15921316	V	15921316	C	T	transcript	F35E8.11.1	cdr-1	F35E8.11	MODIFIER	c.-60C>T	NA	protein_coding_gene	Slope	15660911	17615557	0.311012	1.72697
WBGene00000412	V_15922164	V	15922164	T	A	transcript	F35E8.11.1	cdr-1	F35E8.11	MODIFIER	c.357+22T>A	NA	protein_coding_gene	Slope	15660911	17615557	0.311012	1.72697
WBGene00000412	V_15921359	V	15921359	GTAC	G	transcript	F35E8.11.1	cdr-1	F35E8.11	MODIFIER	c.-12_-10delACT	NA	protein_coding_gene	Slope	15660911	17615557	NA	1.12534
WBGene00000412	V_15921359	V	15921359	GTAC	G	transcript	F35E8.11.1	cdr-1	F35E8.11	MODIFIER	c.-12_-10delACT	NA	protein_coding_gene	PC1	15775895	18065050	NA	0.982192
WBGene00000412	V_15921341	V	15921341	A	T	transcript	F35E8.11.1	cdr-1	F35E8.11	MODIFIER	c.-35A>T	NA	protein_coding_gene	PC1	15775895	18065050	0.235534	0.897552
WBGene00000412	V_15922271	V	15922271	T	A	transcript	F35E8.11.1	cdr-1	F35E8.11	MODIFIER	c.425+12T>A	NA	protein_coding_gene	PC1	15775895	18065050	0.235534	0.897552
WBGene00000412	V_15922302	V	15922302	T	A	transcript	F35E8.11.1	cdr-1	F35E8.11	MODIFIER	c.426-10T>A	NA	protein_coding_gene	PC1	15775895	18065050	0.235534	0.897552
WBGene00000412	V_15922270	V	15922270	T	C	transcript	F35E8.11.1	cdr-1	F35E8.11	MODIFIER	c.425+11T>C	NA	protein_coding_gene	PC1	15775895	18065050	0.235534	0.897552
WBGene00000412	V_15922164	V	15922164	T	A	transcript	F35E8.11.1	cdr-1	F35E8.11	MODIFIER	c.357+22T>A	NA	protein_coding_gene	PC1	15775895	18065050	0.235534	0.897552
WBGene00000412	V_15921316	V	15921316	C	T	transcript	F35E8.11.1	cdr-1	F35E8.11	MODIFIER	c.-60C>T	NA	protein_coding_gene	PC1	15775895	18065050	0.235534	0.897552
WBGene00000412	V_15922791	V	15922791	G	A	transcript	F35E8.11.1	cdr-1	F35E8.11	MODIFIER	c.*18G>A	NA	protein_coding_gene	PC1	15775895	18065050	0.24794	0.810097
WBGene00000412	V_15922788	V	15922788	C	T	transcript	F35E8.11.1	cdr-1	F35E8.11	MODIFIER	c.*15C>T	NA	protein_coding_gene	PC1	15775895	18065050	0.24794	0.810097
WBGene00000412	V_15921322	V	15921322	G	T	transcript	F35E8.11.1	cdr-1	F35E8.11	MODIFIER	c.-54G>T	NA	protein_coding_gene	PC1	15775895	18065050	0.24794	0.810097
WBGene00000412	V_15922160	V	15922160	C	T	transcript	F35E8.11.1	cdr-1	F35E8.11	MODIFIER	c.357+18C>T	NA	protein_coding_gene	PC1	15775895	18065050	0.24794	0.810097
WBGene00000412	V_15922268	V	15922268	A	G	transcript	F35E8.11.1	cdr-1	F35E8.11	MODIFIER	c.425+9A>G	NA	protein_coding_gene	PC1	15775895	18065050	0.24794	0.810097
WBGene00000412	V_15922583	V	15922583	T	G	transcript	F35E8.11.1	cdr-1	F35E8.11	MODIFIER	c.684+13T>G	NA	protein_coding_gene	PC1	15775895	18065050	0.24794	0.810097
WBGene00000412	V_15922281	V	15922281	G	C	transcript	F35E8.11.1	cdr-1	F35E8.11	MODIFIER	c.425+22G>C	NA	protein_coding_gene	PC1	15775895	18065050	0.0126358	0.534135
WBGene00000412	V_15922281	V	15922281	G	C	transcript	F35E8.11.1	cdr-1	F35E8.11	MODIFIER	c.425+22G>C	NA	protein_coding_gene	Slope	15660911	17615557	0.0655062	0.409321
WBGene00000412	V_15921370	V	15921370	TC	T	transcript	F35E8.11.1	cdr-1	F35E8.11	MODIFIER	c.-5delC	NA	protein_coding_gene	Slope	15660911	17615557	NA	0.229197
WBGene00000412	V_15921364	V	15921364	AC	A	transcript	F35E8.11.1	cdr-1	F35E8.11	MODIFIER	c.-11delC	NA	protein_coding_gene	Slope	15660911	17615557	NA	0.229197
WBGene00000412	V_15921368	V	15921368	T	TA	transcript	F35E8.11.1	cdr-1	F35E8.11	MODIFIER	c.-8_-7insA	NA	protein_coding_gene	Slope	15660911	17615557	NA	0.229197
WBGene00000412	V_15921370	V	15921370	TC	T	transcript	F35E8.11.1	cdr-1	F35E8.11	MODIFIER	c.-5delC	NA	protein_coding_gene	PC1	15775895	18065050	NA	0.0752292
WBGene00000412	V_15921368	V	15921368	T	TA	transcript	F35E8.11.1	cdr-1	F35E8.11	MODIFIER	c.-8_-7insA	NA	protein_coding_gene	PC1	15775895	18065050	NA	0.0752292
WBGene00000412	V_15921364	V	15921364	AC	A	transcript	F35E8.11.1	cdr-1	F35E8.11	MODIFIER	c.-11delC	NA	protein_coding_gene	PC1	15775895	18065050	NA	0.0752292
WBGene00011517	V_15886892	V	15886892	T	C	transcript	T06C12.10.1	cgt-1	T06C12.10	LOW	c.1383A>G	p.Leu461Leu	protein_coding_gene	Slope	15660911	17615557	0.29773	2.23786
WBGene00011517	V_15886892	V	15886892	T	C	transcript	T06C12.10.1	cgt-1	T06C12.10	LOW	c.1383A>G	p.Leu461Leu	protein_coding_gene	PC1	15775895	18065050	0.223602	0.842259
WBGene00011517	V_15888756	V	15888756	G	A	transcript	T06C12.10.1	cgt-1	T06C12.10	LOW	c.44-6C>T	NA	protein_coding_gene	Slope	15660911	17615557	0.0844942	0.803175
[truncated: 19,768 more rows]

## Sheet: FineMapping_irlds
WBGeneID	MARKER	CHROM	POS	REF	ALT	TRAIT	VARIANT_LOG10p	STRAIN_GENOTYPE	STRAIN	REGION	WBFeature_TYPE	WBFeature_ID	VARIANT_IMPACT	NUCLEOTIDE_CHANGE	AMINO_ACID_CHANGE	symbol
[truncated: 300 more rows]

[truncated: 6 more sheets: Divergence_irlds, WormCat_output, VariantQTL_proteinDomains, CRISPR_sequences, Genotyping, NIL_seq]
