# Supplementary figures and images for: Using population selection and sequencing to characterize natural variation of starvation resistance in Caenorhabditis elegans
Source: eLife journal article supplement (doi:10.7554/elife.80204), 2022-06-21

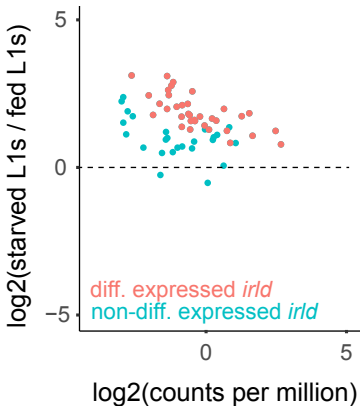

Supplement: supp [file elife-80204-supp-v1.zip]

Absolute value of latitude

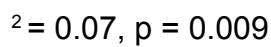

Elevation

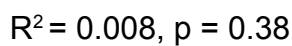

Substrate

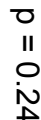

Supplement: supp [file elife-80204-supp-v1.zip]

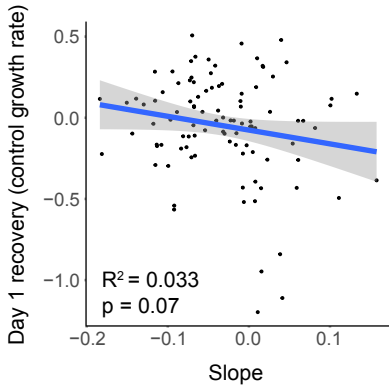

Supplement: supp [file elife-80204-supp-v1.zip]

$\log_2(\text{day N frequency} / \text{day 1 frequency})$  for N = 1, 9, 13, and 17

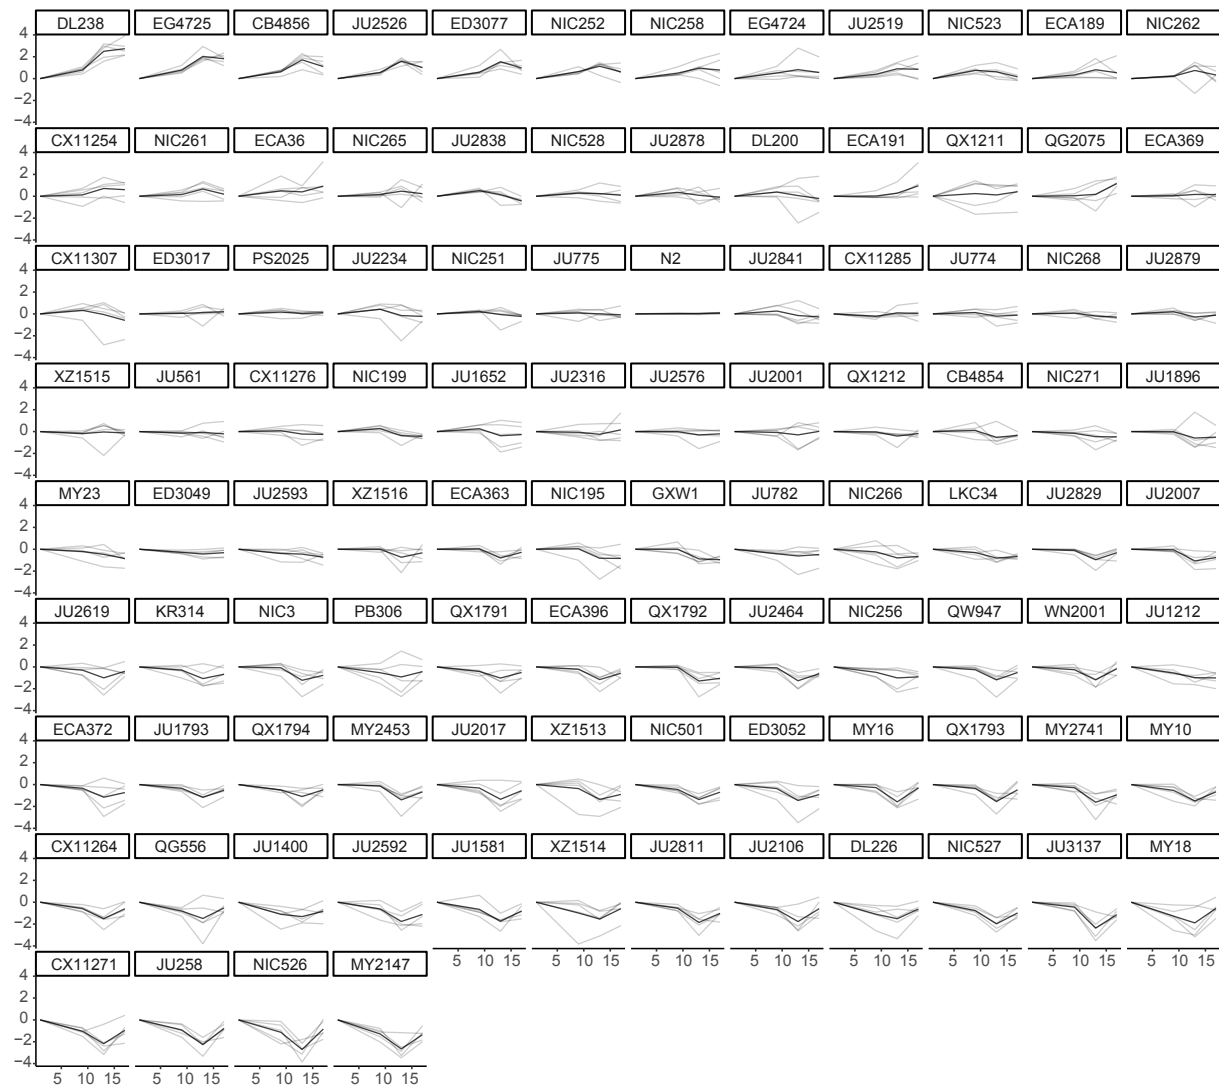

Days of L1 arrest

Supplement: supp [file elife-80204-supp-v1.zip]

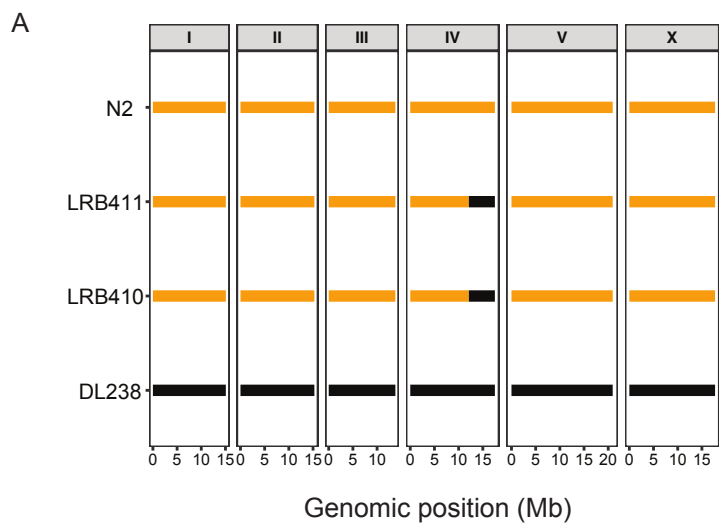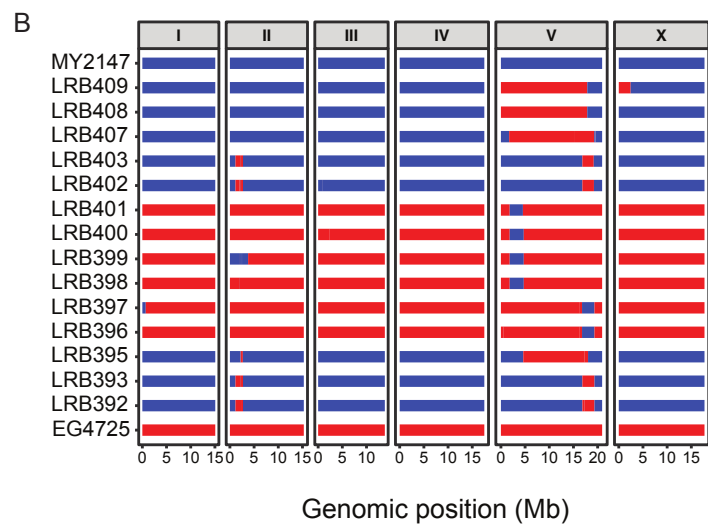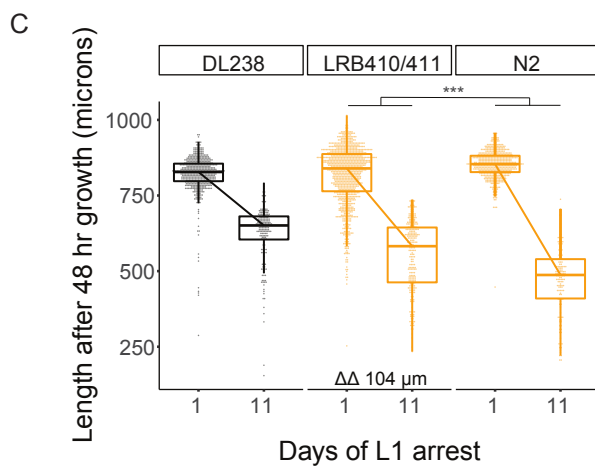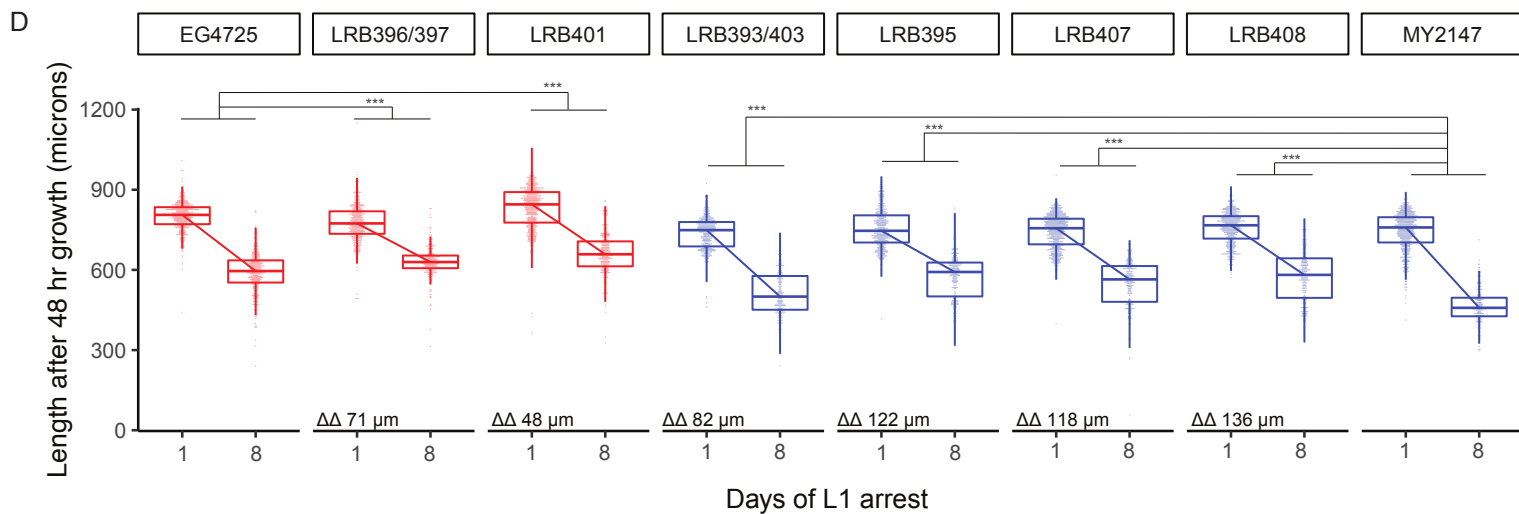

Supplement: supp [file elife-80204-supp-v1.zip]

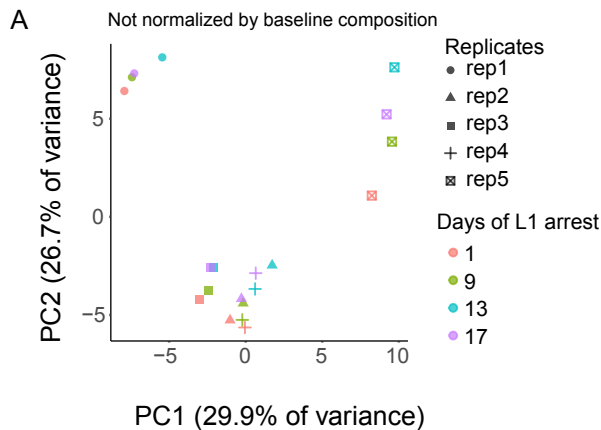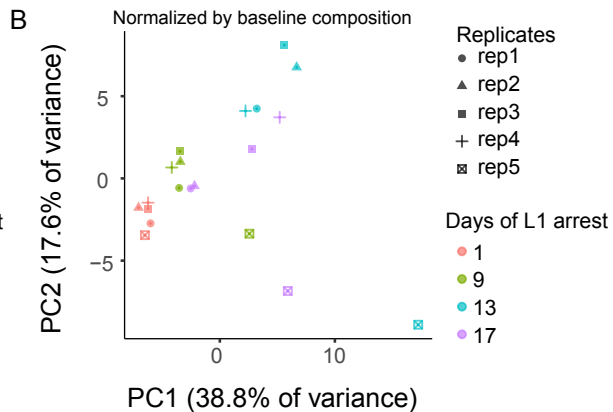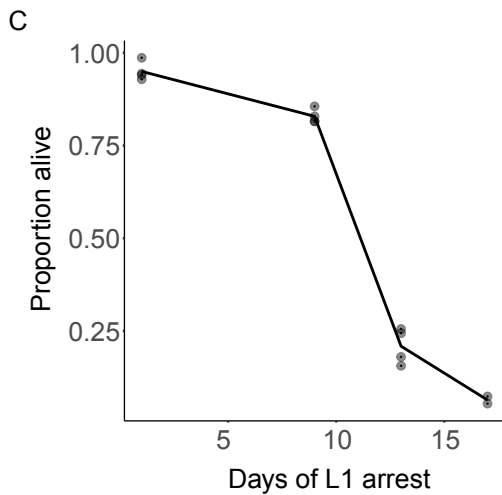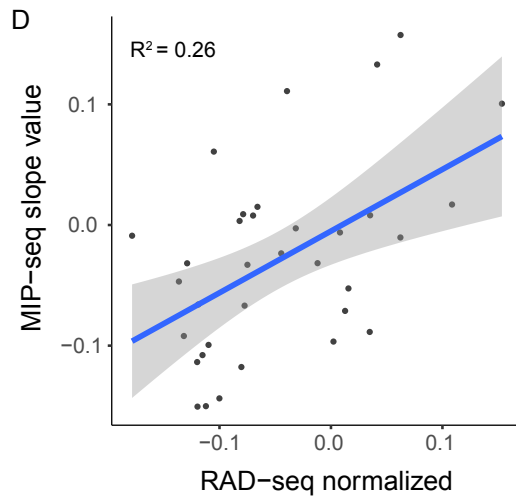

Supplement: supp [file elife-80204-supp-v1.zip]
